# Supplementary material
Source: ML conference proceedings conference paper supplement (https://aclanthology.org/2024.emnlp-main.886)
Supplement: software [file CreHate.xlsx]

## Sheet: Sheet1
ID	text	United_States_Hate	Australia_Hate	United_Kingdom_Hate	South_Africa_Hate	Singapore_Hate
AU-YouTube-0	The National Authoritarian Terrorist Organization is behind this instability, just like they are responsible for all the other coos to disrupt opposing countries around the world!😔	0	1	0	0	1
AU-YouTube-1	American propaganda, nothing comes out of the US is true, the terrorist cia has been committing much worse crimes	0	0	0	0	1
AU-YouTube-2	@USER they just let 2 terrorists go from Gitmo they have room	0	0	0	0	0
AU-YouTube-3	USA BIGGEST TERRORISTS	1	1	0	1	1
AU-YouTube-4	China isn't nothing but a crap ton of terrorists in one crap hole country. We should kick every one of them out of USA	1	1	1	1	1
AU-YouTube-5	Taiwan president should issue warning to fag xi jin ping n put him on most wanted	1	1	1	1	1
AU-YouTube-6	I look more Abo than Gordon Reid and i ain't got any Abo in me.	0	1	1	1	0
AU-YouTube-7	Go to hell, Abbo knees	0	1	1	0	1
AU-YouTube-8	Well good for one good for why should the abos get it all	0	1	0	0	1
AU-YouTube-9	Calling people Abo is so 1960's racist slang	0	0	0	0	0
AU-YouTube-10	The special treatment is for real abbos only.......equality.	0	1	1	1	0
AU-YouTube-11	The US is committed to defending Australia? 😆🤣😆🤣😆🤣 sooo fucken funny, the US should first be able to defend itself. Two fascist coward terrorist nations are making fool of themselves	0	1	1	0	1
AU-YouTube-12	@USER no clue joe north atlantic terrorist organisation didnt commence to expand 2014	0	0	0	0	0
AU-YouTube-13	Well done Australia but as a proud Pom England to be fair never turned up 👏👏👏👏👏👏	0	0	0	0	0
AU-YouTube-14	Bruh Nelson Mandela was a communist terrorist he and his wife used to burn opponents with burning tires and blew up school buses	0	0	0	1	0
AU-YouTube-15	What part of hammass being labeled terrorists did you miss???	0	0	0	1	0
AU-YouTube-16	Because they are into trafficking woman so to them it's like ordering lunch they are sickening pedophiles	0	1	0	0	0
AU-YouTube-17	As a Pom im proud of you at Sky Aus IM ASHAMED OF SLY NEWS UK ,i cant believe the difference between true truth & the shite we are sold at home	0	0	0	0	0
AU-YouTube-18	Key findings: There's no curry restaurant on the Moon (soon to change). They'll call the franchise the Luney Indian.	0	0	1	1	0
AU-YouTube-19	​​ @USER we would hv established few curry restaurants before your "mass transits" And curry would be shoved down your throats as a welcome meal.	0	1	1	1	0
AU-YouTube-20	Does it have curry on board?	0	0	0	0	0
AU-YouTube-21	At least they now know that India is more than just curry and cricket 😅	0	0	0	1	1
AU-YouTube-22	And Australians can't wait a second to say Cunt and Mate, clown from Kangaroo Land	0	1	1	0	0
AU-YouTube-23	Made out of paper.... fuelled by curry farts!	0	1	0	1	0
AU-YouTube-24	@USER So what are u crying about here.. Ur country can't even deal with animals like rabbits, Camels, foxes not even frogs lol 😅.. So forget about space...	0	0	0	1	0
AU-YouTube-25	Fuck off Australia just before made making fun of us and morale support fucking cunts white are	1	1	1	1	1
AU-YouTube-26	​ @USER stupid Your country only funds Terrorist ngo Missionary	1	0	1	1	1
AU-YouTube-27	The ABC is infested with communists who love the terrorists in Palestine and hate democratic Israel	1	1	1	0	1
AU-YouTube-28	Islam is a satanic ideology for pedophiles and weak minded people	1	1	1	1	1
AU-YouTube-29	JUSTIN TRUDEAU PM OF CANADA SELF PROCLAIMED FEMINIST LOVES ENSLAVEMENT OF WOMEN BY ISLAMIC TERRORISTS BUT MAYBE KARMA IS COMING HOME TO THIS BASTARD HE HAS CORONAVIRUS HOPEFULLY IT WILL BE FATALE	1	1	1	1	1
AU-YouTube-30	Watch the video. Her murderers had SMILES and looks of nonchalance on their faces. To them, this was fun and no big deal.	0	0	0	0	0
AU-YouTube-31	By giving the Islamic council access to the Taliban they will inspire more terrorist activities here in Australia, it's reckless and it's a dumb idea	0	1	0	1	1
AU-YouTube-32	kick these cunts out oz catch hold of your selves	0	1	0	1	1
AU-YouTube-33	Taliban are Terrorist .Just say no. They created a Humanitarian crises. Taliban are killing and torchuring women and people daily.	0	0	0	1	1
AU-YouTube-34	I am an afghan muslim escape from discrimination rule of Taliban, they are a terrorist group, no need to talk with such Extremist group	0	0	0	1	0
AU-YouTube-35	same traitor coward terrorists as always happens 😵💀🖤💔🤣😭😋😁💤	0	0	0	1	1
AU-YouTube-36	They need to be labelled as terrorist groups an deported..	1	1	1	1	1
AU-YouTube-37	just like America it's world leader, when they are strong, funding terrorist and manipulation poor people into terrorist just like taliban.	0	0	1	1	1
AU-YouTube-38	Mechanical engineer to go to school 😂 just give them what is right for them you cunt tell him piers. Islamic can't stop gila or woman to get educated. What a pricks	0	1	1	1	1
AU-YouTube-39	schools are closed because u mf put murderers in schools they are setteling the schools and temp closed them to make things peaceful	0	0	0	0	0
AU-YouTube-40	This man with a beard is very malicious and unfortunately the majority of Muslims support him and practice the same provocative method and evade the answer. Terrorist ideology distorts human nature.	1	1	1	1	0
AU-YouTube-41	It's Achmed the terrorist 😂😂😂 I was expecting him to say "silence I kill you" 😂😂	1	1	1	0	0
AU-YouTube-42	I bet that turban towel head married his 6 year daughter	1	1	1	1	1
AU-YouTube-43	Blow that towel head up	1	1	1	0	1
AU-YouTube-44	Shout it out Meg!!..A CAT CANNOT BE A DOG!!!!!!..A FROG CANNOT BE A RABBIT..A BUTTERFLY CANNOT BE PIGEON...A FISH CANNOT BE AN ANT AND FINALLY A MAN CANNOT BE A WOMAN.!!!.	1	1	1	0	1
AU-YouTube-45	non binary was invented by a pedophile named Alfred kinsie, saying you're non binary is like walking around quoting jeffrey Epstein	1	1	1	1	1
AU-YouTube-46	Child abuse !! Mental child abuse ! She's not a parent ! She's a pedophile !	1	0	1	0	1
AU-YouTube-47	she only needed that episode to be shown, now its on the internet and every poor kid can see it, evil fucking cunts !!! what the actuall fuck is wrong with this groomers????	0	0	0	0	0
AU-YouTube-48	DEATH TO THE PALE SOUTH AFRICAN CUNT WHORE INVADERS!	1	1	1	1	1
AU-YouTube-49	Any people who are supporting this. They are supporting pedophiles who are going to target children to think this normal thinking	0	1	1	0	1
AU-YouTube-50	Because without "straight" you wouldn't be here at all ya shirtlifter. We'd die out in a generation if we were all homos.	1	1	1	1	1
AU-YouTube-51	Eww this is all disgusting...next they will have pedophiles claiming they identify as a child ....crazy	0	1	1	1	0
AU-YouTube-52	The Satanic Global Elite pedophiles are behind all these trans people...they are going after our kids after desecrating the men and women.... please fight back. We are many against their few....	1	1	1	1	1
AU-YouTube-53	Stop trying to push the rainbow agenda on our kids prek they need trans drag queen showns in school ? Really? Keep your pedophiles books	1	1	1	0	1
AU-YouTube-54	Of course he supports all terrorists	0	1	0	1	1
AU-YouTube-55	He can't wait for pedophiles to be added to the alphabet people. Won't be long now, couple of years Joe then you can sniff all the kiddies you want.	1	0	1	1	0
AU-YouTube-56	Pandering to groomers and pedophiles, that's the way Joe rolls.	1	0	0	0	1
AU-YouTube-57	The West are the Pedophile Capital of the World🤮🤮🤮	1	1	0	0	1
AU-YouTube-58	The lgbtq+ don’t accept pedophiles but nice try. Provide some evidence if i am wrong	0	0	0	0	0
AU-YouTube-59	So the Biden regime will invite an openly Pedophile next , to stop the stereotype about MAPS . People ? FJB AND HIS REGIME 🤬	1	0	1	0	0
AU-YouTube-60	You’re Irish and you support your pals the Provisional IRA murderers of the innocent Australian civilians Stephen Melrose and Nick Spanos. You support terrorists.	0	1	1	1	1
AU-YouTube-61	Can we now admit trannies are fucking nuts	1	1	1	1	1
AU-YouTube-62	The proverbial slippery slope !!!!! They Fd up, they came for our children !!!!	0	0	0	0	1
AU-YouTube-63	This is how they work. They are domestic terrorists. They are taking over corporations world wide and nothing good will come of it.	0	1	0	0	1
AU-YouTube-64	until the Terrorists(Normal Society) start strapping themselves with IED's & AR's and stand between LGBTQ and start blasting! HECK YEAH!!!!!!!!!!!!!!!!!!!!!!	1	1	1	1	1
AU-YouTube-65	The '+' is for Pedophiles and, the euphimistically called, Minor Attracted Persons.	0	1	0	1	0
AU-YouTube-66	To late! The damage is already done! Laws should be put back in place making homo sexuality illegal!	1	1	1	1	1
AU-YouTube-67	Good for Uganda. LGBT is a trojan horse to transgenderism and grooming children. The slippery slope is real.	1	1	1	0	1
AU-YouTube-68	Best wishes Uganda . Fighting back against violent homosexuality & the grooming and violation of children . Australia .	1	1	1	0	0
AU-YouTube-69	@USER ...That's not what the the news anchor said concerning the Ugandan law. He said Death penalty is for AGGREVATED homo crimes against children, and passing HIV to same sex partners.	0	0	0	0	0
AU-YouTube-70	He isn't gay he is miserable. Whether he is hetero or homo is another matter.	0	0	0	1	0
AU-YouTube-71	Get trannies out of womens/mens sports. I think most people would agree. These people should start their own divisions if they want to compete.	1	1	1	1	1
AU-YouTube-72	Is Trudeau now pedophile or homosexual?	1	0	1	1	1
AU-Reddit-0	Imagine how clever he thought he was being writing that tweet - "her last name is Abo; boy, have I got some gold up my sleeve."	0	0	0	0	0
AU-Reddit-1	Poof doof and bush doofs	0	0	0	0	0
AU-Reddit-2	Yes cunt… it is	0	0	0	0	1
AU-Reddit-3	Lmao - time to start your tally. I was gettin "ching chong china-man'd" back in grade 3	1	1	1	0	1
AU-Reddit-4	Call a dumb cunt a dumb cunt - and call the police	0	0	0	1	0
AU-Reddit-5	It's not lock down, it's lock out, which was long before the pandemic. For all the awesome Leb foodie night life, come out to Bankstown area, and then drop by my place for Wheel of Yagoona	0	0	0	0	0
AU-Reddit-6	So, to summarise your point, all those fucking low-life gooks sandgropers were racist towards you even though you don't look like a towel head and they were OK when you talked like a pom ?	1	1	1	1	1
AU-Reddit-7	"Super racist remarks" "Ching Chong" We're doomed.	1	1	1	1	1
AU-Reddit-8	If an Asian guy wants to call his burger a ching chong burger then let him.	1	1	1	0	1
AU-Reddit-9	You may have just seen some drunks coming back from denzel curry tbh	0	0	0	0	0
AU-Reddit-10	They knew they were doing the wrong thing, but they'd already decided to do it, so they found a way to justify it to themselves. Stupid, selfish cunts. Everyone on that boat deserves an uppercut.	0	0	0	1	0
AU-Reddit-11	It is a thing, only different now is we are full of dumb cunts who don't use the other half of their brain.	0	0	0	0	0
AU-Reddit-12	Welcome to Melbourne. Full of youth criminals and sluts. They all deserve to be stabbed	1	1	1	1	1
AU-Reddit-13	Being a real estate agent requires no education and is everyone's fallback job. Are you really surprised that they're cunts? They're just being them.	0	0	0	0	1
AU-Reddit-14	Recovering Mormon and fellow homo here. Congratulations on the change in lifestyle. Moved to Brisbane in 2017. Feel free to send a DM if you'd like	0	0	0	0	0
AU-Reddit-15	The understanding that "Cunts fucked" is something that is broken and cannot be repaired, or is not going to be financially insignificant to repair.	0	0	0	0	0
AU-Reddit-16	Come around to my place cunt and we can see	0	0	0	0	1
AU-Reddit-17	short answer No, you are not :) fuck those cunts	0	0	0	1	0
AU-Reddit-18	So your mother-in-law is a cunt? and so is her sister? It happens.	1	0	0	0	0
AU-Reddit-19	I prefer chicken katsu curry.	0	0	0	0	0
AU-Reddit-20	The cunts who can't turn a block later or earlier on a right turn with a turning lane and decide to clog up a lane really grinds my gears. Still better than Redlands......	0	0	0	0	1
AU-Reddit-21	Typical abos. Im from the far north and this is a daily occurrence, even woman doing it to 120kg full grown ass men.. alcohol and drugs play a huge part.	0	1	1	1	0
AU-Reddit-22	That’s fine. With the new digital loss of rights act. We can get a god fearing Christian warrior in the police to plant some cp on the homos hard drive. Problem solved.	1	1	1	1	1
AU-Reddit-23	My friend djs at poof doofs in prahran so he recommends that Also theres a meetup discord URL	0	1	0	0	0
AU-Reddit-24	Saturdays - poof doof. Weekdays- Sircuit, Rainbow, Peel	0	0	0	0	0
AU-Reddit-25	*in a civil suit. Now bring this murderer to a military tribunal and throw him in jail.	0	0	0	0	0
AU-Reddit-26	Jesus a week before the guy was supposed to get married, and the article says that the murderer was unknown to the victims. How horrible and random.	0	0	0	0	0
AU-Reddit-27	They'd be walking if he was a double murderer.	0	0	0	0	0
AU-Reddit-28	What about little Suzie who going to stop her doing onlyfans an being a disgusting slut	1	1	1	0	0
AU-Reddit-29	No doubt 10 years and bail at 5 like the other teen murderers get. Disgusting	0	0	0	0	0
AU-Reddit-30	He’s a murderer in the same way Hans Moleman from the Simpsons is blind	0	0	0	0	0
AU-Reddit-31	" They say I know fkn nothing! But I know fk all! " -Wog Boy Now googling 'muzza'	0	0	1	0	0
AU-Reddit-32	Man I jerked off over her so many times in grade 11 even with the wog Moe. Same with Rose Byrne in two hands	0	0	0	0	0
AU-Reddit-33	Gets said on minesites alot. Aboriginals also use it as a add-on to their casual racism. Ie. White cunt, black cunt, dog cunt etc. In general society it's not quite so used.	1	1	1	1	1
AU-Reddit-34	Anjappar in the HSBC building. Try their Egg Curry and Rice.	0	0	0	0	0
AU-Reddit-35	Hunter connection - Malaysian curry is cheap and very decentv for the money imo. Roti set for the win.	0	0	0	0	0
AU-Reddit-36	I want to know what's in the green file. Curry + accounting on a Wednesday night?	0	0	0	0	0
AU-Reddit-37	King curry hut - Bracken ridge!	0	0	0	1	0
AU-Reddit-38	Curry n cask in corinda is the best.	0	0	0	0	0
AU-Reddit-39	I dunno, Ravneels Curry House at Burpengary is pretty good	0	0	0	0	0
AU-Reddit-40	IGA in Royal St, East Perth serves delicious takeaway curry/Indian food in containers.	0	0	0	0	0
AU-Reddit-41	House of Spice in Baldivis does a delicious goat curry. Mother India in Fremantle is amazing too, but they’re only open on weekends, and I don’t think they do a goat curry.	0	0	0	0	0
AU-Reddit-42	Curries on Blvd Joondalup does a good goat curry	0	0	0	0	0
AU-Reddit-43	Check out the curries at Logical Indian at Rundle Mall, Next to HnM.	0	0	0	0	0
AU-Reddit-44	Name something more iconic than a crusty old racist aussie cunt	1	0	1	1	1
AU-Reddit-45	Typical right wing old cunt, not surprising. Can't even tell the difference between Asians	1	1	1	1	1
AU-Reddit-46	“Fukn chinks are spying on me fishes”	1	1	1	0	1
AU-Reddit-47	Does the Pope shit in the woods? It's not rocket surgery. Ironing out the chinks.	0	1	1	0	1
AU-Reddit-48	Probably should have made it more clear that this post was just for laughs so that people didn’t feel the need to define chinks...	1	1	1	0	1
AU-Reddit-49	iron out all the chinks that’s right that’s my education minister right there 😤😤😤	1	1	1	0	1
AU-Reddit-50	She will be ironing for a very long time in syd...chinks everywhere. She may need a steam press. A BIG ONE😷	1	1	1	1	1
AU-Reddit-51	I run a sparky business and I have to answer every call. Honestly 50% of calls now are from some cunt trying to scam me, or sell me something	0	0	0	0	0
AU-Reddit-52	Well of course he would, thats how them secretly Moslem Lebs are. /s	1	1	1	1	1
AU-Reddit-53	My leb friends say Mr. Shawarma in Greenacre is good shawarma. I haven't tried it myself though.	0	0	0	0	0
AU-Reddit-54	Lebs. Guaranteed.	0	1	0	0	0
AU-Reddit-55	These cunts getting one cent of taxpayers money for their brainwashing is some bullshit	0	0	0	0	0
AU-Reddit-56	Can religious church's stop hiring pedophiles?	0	0	1	0	1
AU-Reddit-57	They also have poof doofs at the ivy.	1	0	1	0	0
AU-Reddit-58	You will be safe at Poof Doof, but bored. Try Heaps Gay or Unicorns parties. More ‘variety’ of people of the rainbow!	0	0	0	0	1
AU-Reddit-59	As a straight bloke I have been to Poof Doof with other straight mates. The only thing to watch out for at Doof are the straight chicks, they are cooked cunts.	1	1	1	1	1
AU-Reddit-60	>So of course like a modern homo Do gay men refer to themselves (and each other?) as homos? I only know two gay men but I've never heard them use that term.	1	0	0	1	0
AU-Reddit-61	It's just cunts trying to sell shit. Not even kidding.	0	0	0	0	0
AU-Reddit-62	Bearded tit has a heap on! Sad Dyke Sundays is making a return this weekend too ☺️	1	0	0	0	0
AU-Reddit-63	Also Basil “I hate homeless people”. Cunt.	1	0	0	1	1
AU-Reddit-64	Odds on the Principal is a raging homo.	1	1	1	1	1
AU-Reddit-65	Get rid of him. We love homos.	0	0	0	0	0
AU-Reddit-66	Those homos and their welcome to country/policing agenda.../s	1	0	1	1	1
AU-Reddit-67	Another homo-in-denial joins the ranks.	1	1	1	1	1
AU-Reddit-68	Pedophile cult covers up pedophila. What's new? Poor woman.	0	0	0	0	0
AU-Reddit-69	I hear he has disbanded the navy too. He did an inspection, so many boat people😱	0	0	0	0	0
AU-Reddit-70	But some of those boat people were au pairs.	0	1	1	0	0
AU-Reddit-71	Ah the irony, when Australians become the boat people.	0	0	1	1	1
AU-Reddit-72	Majority of people in this country are selfish, miserable bastards. Simple. Never mind, some dickhead pointed out only 41.1% of Australians are dirty, old cunts. My bad!	1	1	0	1	1
AU-Reddit-73	Meanwhile in Brighton it's Lebs on jet skis doing the same crap.	0	1	1	1	1
AU-Reddit-74	This thread reinforces that Sydney is full of entitled cunts who all think they are right.	0	0	0	1	1
AU-Reddit-75	Its always a shit show there. I heard a Nurse at DoC call indigenous employees as boongs because they talked loudly.	0	0	1	1	0
AU-Reddit-76	Your landlord is a shit cunt.	0	0	0	0	1
GB-YouTube-0	Out of all the immigrants how many are gonna go back home?	0	1	1	0	0
GB-YouTube-1	Well it'd be a shame if Paddy lost you in the ocean.	0	0	0	0	0
GB-YouTube-2	@USER Very few Poles in Ireland now, they went to better places once the Celtic Tiger went tits up.	0	0	0	0	1
GB-YouTube-3	People are protesting all over Ireland not just Dublin rural Ireland is swamped with immigrants aswell	0	1	0	0	0
GB-YouTube-4	Now you know how we feel when your pikeys come over to england! 😂😂😂	1	1	1	1	1
GB-YouTube-5	The illegal immigrants are far smarter than the Irish Government.	0	1	0	0	0
GB-YouTube-6	Too right,I know you have poles living and working in ireland and many married Irish ladies,they have fitted in quite well, similar cultures.	0	0	0	0	0
GB-YouTube-7	Home Office will do nothing. Illegal immigrants are more valuable than us. BICYCLE S are expensive, I had to save to buy one. WHERE DID THEY GET £ HUNDREDS ????	1	1	0	0	1
GB-YouTube-8	SOUTH AFRICANS are called xenophobic when they complain about illegal immigrants who get employed and paid cheap labour. Thank you	0	0	0	0	1
GB-YouTube-9	No law and order against the illegal immigrants criminals cartels fentanly drugs	1	1	1	0	1
GB-YouTube-10	when immigrants have the vote, an vote to say they're for immigration, how can you tell what the true figures are?	0	0	0	1	0
GB-YouTube-11	I've just seen a group of 8 immigrants walking in my village. It's a disgrace and shouldn't be allowed!!!!!	1	1	1	1	1
GB-YouTube-12	Including chinese immigrants credible questions they bring illegal drugs and gambling that not allowed in their own country	1	1	1	1	0
GB-YouTube-13	Love to Britain thats the path to follow. Massive economical immigrants taked as for asylum seekers will cause mayhem like in France please follow the path of Poland and Hungary.	0	0	1	0	1
GB-YouTube-14	Yeah yeah yeah we’ve heard this all before. He wants more immigrants not less. Lies lies lies	0	0	0	0	1
GB-YouTube-15	Have a look at London and Paris, Having too many immigrants is bad for most country	1	1	1	1	1
GB-YouTube-16	USA doesn’t admit as many immigrants as Canada. Take a look up here it’s insanity	0	0	0	0	0
GB-YouTube-17	They never address the elephant in the room which is that only 1 in 5 Muslims immigrants work in the U.K.	0	0	1	0	0
GB-YouTube-18	saw a youtuber channel eh went to village in slovkia alot of the gypsy people there want to come back to uk	1	0	0	0	1
GB-YouTube-19	@USER Glad you are where you belong - at last. My family are all immigrants and nobody ran away. Says more about you than Britain.	0	0	0	0	0
GB-YouTube-20	@USER A pikey calling someone uneducated. The irony is painful 😂	1	0	1	1	1
GB-YouTube-21	@USER Islamic terrorists	0	0	1	1	1
GB-YouTube-22	😂but paki never tried to stop the accident by shooting it down ..probably they love accident 😂	1	1	1	0	1
GB-YouTube-23	Now that a high profile burning of the homosexual and queer 'pride' flag has been made, maybe he should do the same in order to recant. I'm surprised that more of this is being done by Muslims.	1	1	1	1	0
GB-YouTube-24	Show your audience them Ukrainian nazis	1	1	1	1	1
GB-YouTube-25	We Poles 🇵🇱 share with British 🇬🇧common Christian legacy ✝️, but you do prefer Muslims ☪️ 👍	0	0	0	1	1
GB-YouTube-26	We think the U.K. should look at European immigrants . 6 million compared to 500k since 2015. 600k since 2008.	0	0	0	0	0
GB-YouTube-27	British people refuse to do the jobs immigrants will do. Education is poor in the UK immigrants fill skill shortages.	0	0	0	0	0
GB-YouTube-28	Before long we will have more immigrants than UK citizens. What do our government do?? Poke their noses in other countries wars. Wake up	0	0	1	0	1
GB-YouTube-29	Brits are just jealous. All these immigrants are highly educated and hard working. They are putting lazy British to shame	1	0	1	0	1
GB-YouTube-30	Those are the skilled immigrants that have integrated into Western societies, instead of creating parallel societies within their new host country.	0	0	0	1	0
GB-YouTube-31	It doesn’t lol, not when most immigrants that people are angry about are the dinghy scroungers	1	1	1	1	1
GB-YouTube-32	There's no one to vote for who wants to stop it. The won't realise how bad it is until the immigrants vote to deport the British. 🎉	0	1	1	0	1
GB-YouTube-33	Australia take in more net immigrants per person than we do- they're on track for over 300,000 this year. So you'd be looking at similar levels, maybe more.	0	0	0	0	0
GB-YouTube-34	By definition these " illegal " immigrants are criminals but instead of being penalised , like everyone else, they get rewarded. A total insult to the British people	0	1	1	1	1
GB-YouTube-35	Scrap the processing, SIMPLY ROUND THESE ILLEGAL CRIMINAL IMMIGRANTS UO GET THEM ON A BOAT AND SEND THEM TO THE DESERTS THEY CAME FROM, OR FRANCE.	1	1	1	1	1
GB-YouTube-36	You have to give them I.d if you buy fags the cheek	1	0	0	0	0
GB-YouTube-37	But wait...............I thought that illegal immigrants were not working, getting everything for free? Which is it?	0	0	0	1	0
GB-YouTube-38	What’s the problem? It’s called capitalism………supply and demand! If it wasn’t for plucky immigrants you won’t get your pizza. Leave them alone, you Brexit Bullies!	0	0	0	1	0
GB-YouTube-39	The officers 👮‍♀️ want to nip down the coast they’ll find plenty there! Not hard is it 🤦🏼‍♂️😡	0	0	0	0	0
GB-YouTube-40	@USER Donald Trump he is more British than the ones we have 50% Mommy is a Jock and he knows how to run Hotels he will get a better deal for our Illegals.	0	0	0	1	1
GB-YouTube-41	Muslim women with nice car helps immigrants cheat...no????	1	1	1	1	1
GB-YouTube-42	All immigrants lawyers are filthy rich ...	0	0	0	1	1
GB-YouTube-43	An immigrant helping immigrants get in the UK. Nothing new here	0	1	1	0	1
GB-YouTube-44	Labour councillor helping illegal immigrants bypass U.K. immigration laws ! How is this being tolerated by the Labour Party ?	0	1	0	0	0
GB-YouTube-45	We pakis are the most corrupt folks.	1	1	1	0	1
GB-YouTube-46	@USER i dont eat frogs anyway so fuck em	0	0	0	0	0
GB-YouTube-47	@USER Umh! Hitler and the Nazis who pillaged, terrorised and murdered the French??	0	0	0	0	0
GB-YouTube-48	If you really want to shorten the war, Russia, try messing with the Poles 😂	0	0	0	0	0
GB-YouTube-49	Wagner are standing by the Belarus border in case the poles try anything stupid.	0	0	0	0	0
GB-YouTube-50	​ @USER Did you miss the attacks on civilians by the Neo Nazi Avoz in The Donbass since 2014 which has killed over 100 children ?	0	0	0	0	0
GB-YouTube-51	@USER i agree. I was talling about gypsy Romanians. Sorry!	0	0	0	0	0
GB-YouTube-52	@USER Gypsy send to Albania Romanians back home and let uk be uk	1	1	1	1	1
GB-YouTube-53	Civil war to expell Islam and queers needed .	1	1	1	1	1
GB-YouTube-54	I am a Muslim from Pakistan. But I see whats wrong with UK. Just letting Immigrants in and then complaining.	0	0	0	0	1
GB-YouTube-55	Alice is so right ,your a boy or a girl as simple as that give me a break whos making up these new gender benders some gay it	1	1	1	1	1
GB-YouTube-56	Igaf how transphobic you think I am, you’re gonna learn what it feels like to catch one with your jaw if you gonna try to rob me. Give her damn money back queer bate.	1	1	1	1	1
GB-YouTube-57	Just call them ladyboys.	1	1	1	1	0
GB-YouTube-58	Who’s Davis? The ladyboy with the Botox eyebrows? Why can’t she accept herself as she is - an old woman with 2 trensticles. And s(he) is mocking her fellow shemales.	1	1	1	1	1
GB-YouTube-59	That's OK as long as they stay in India we have enough queers in britain	1	1	1	1	1
GB-YouTube-60	@USER What? Most of Europe is just as or more accepting of queer people than the US are...	0	0	0	0	0
GB-YouTube-61	how can he be gay if he made some kids with a woman :D I thought gays arent turned on by women :D	0	1	1	1	0
GB-YouTube-62	ITV has already replaced Philips spot on This Morning with a couple of arabic speaking immigrants just off the boat. ITV says their new presenter's represent their wider and majority audience.	1	1	1	0	0
GB-YouTube-63	Holly and the POOF on this morning every MORNING what a Joke , there’s him banging a young man and Holly not doing nothing about it unbelievable 😡😡😡😡	1	1	1	0	0
GB-YouTube-64	Why is he only mentioning gays and lesbians? Why is he ignoring the b, q, double spirit and 75 other groups? I am offended on their behalf?	0	0	0	0	0
GB-YouTube-65	It makes you want to open a bar and hire a lesbian to check for correct genitals at the door. Why cant trans people just open their own bar? That's what gays and lesbians did back in the day.	1	1	1	1	1
GB-YouTube-66	Trans gender is just down the slippery slope of homosexuality. People living in fantasy land. Men who want to be women. And women who want to have sex like a man.	1	1	1	1	1
GB-YouTube-67	What a lesbian being closed minded, bigoted, and sexist. WHO would have thought that!!! BAAAHAAHHHAAAA! Queers acting queer.	1	1	1	1	1
GB-YouTube-68	That tranny should SUE them for discrimination! Lesbians say a man CAN be a woman... so why CAN'T they be lesbian too? We "straight" men find all this lbgt infighting hilarious! 😂😂😂	1	1	1	1	1
GB-YouTube-69	You're fine as a frog hair. Can't say I blame himhershehe. Whoever.. anyways, ill shut up now.	1	0	0	1	1
GB-YouTube-70	@USER queer theory is making you crazy	1	1	1	0	0
GB-YouTube-71	What a joke. All these queers are not getting along. The whole idealogy is sinful & disgusting. These are totally confused people, so no wonder there is chaos within their ranks.	1	1	1	1	1
GB-YouTube-72	And this is why the transgender movement of today will lose, because gays and lesbians, once their allies, will want nothing to do with them.	0	0	1	0	1
GB-YouTube-73	You do all know it will illegal in the future for heterosexual mem to refuse to sleep with men in frocks ? The slippery slope never ever ends	1	1	1	1	1
GB-YouTube-74	You know that this is exactly what homophobes would say about police protecting a gay & lesbian march from attacks by the nazis?	0	0	1	1	0
GB-YouTube-75	so now gays are the good guys? gimme a break.	1	1	1	1	1
GB-YouTube-76	It used too, alas. And queer used to mean strange. Ah, those were the days. 😌	0	0	1	0	0
GB-Reddit-0	Cupcakes. Ideally they'll come out identical, but in practice some will be browner than others, so it'll show you how even the heat is and where the hotspots are.	0	0	0	0	0
GB-Reddit-1	Aw thanks, now I want pea soup & a fag.	0	0	0	0	0
GB-Reddit-2	Booze and fags	1	0	0	1	0
GB-Reddit-3	As an Alpine owner I would've liked to see that display, but I'm not sure I could've dealt with all the god botherers.	0	0	1	0	0
GB-Reddit-4	Taking this opportunity for a fag break before we're on! Not heard our entry yet	0	0	0	0	0
GB-Reddit-5	Oh god, uni all over again and having to explain that faggots are definitely a thing in the Black Country.	1	1	1	1	1
GB-Reddit-6	Can't beat chips done in the Ninjja foodie. Also if you can't taste the difference in the variety of tatties you must smoke 60 fags a day and gargle with bleach.	0	0	0	0	1
GB-Reddit-7	Man, wait till you hear about Fairytale of New York using the word 'faggot'.	1	1	0	1	0
GB-Reddit-8	I enjoy smoking and smirking And weed may not be legal, but it's eeeeverywhere And yes, 'can I bum a fag?' is still a common phrase to hear in your average pub	0	0	0	0	0
GB-Reddit-9	I rarely say cigarette I always say I'm going for a fag	0	0	0	0	0
GB-Reddit-10	For me it's the transphobic gays and lesbians. Like once the right wing nuts are done with us, who do you think they're going to target next??	0	1	1	1	1
GB-Reddit-11	a while back i saw some mush in tescos 7am on a monday morning qued up at the lottery counter in a tiger onesie. looked like he was on the brink of death after a 3 day bender	0	0	0	0	0
GB-Reddit-12	People wont know that you are native american. They will probably think you are Indian or Paki.	0	1	1	1	0
GB-Reddit-13	I apologise upfront for this, but what in gods name is a queer community space, and how does it differ from a community space? Are the benches pink or something?	0	1	1	0	1
GB-Reddit-14	Of you move to lo typool for a queer Community space that's all you wouk have. There is less than shit all in Pontypool.	0	1	0	0	1
GB-Reddit-15	The Nazi's were enemies of the Brits, and the Muslims and the Nazi's both hated the Jews. These people need an education.	1	0	0	0	0
GB-Reddit-16	Dear Americans, When we ask if we can “bum a fag”, it’s not what you think it is. When we say something about a “fanny”, you’re only a few inches out.	0	0	0	1	0
GB-Reddit-17	And you should ask tranny's what they call there hole	1	1	1	1	1
GB-Reddit-18	I can't, I'm queer and they won't take it	0	0	0	0	0
GB-Reddit-19	This morning I had a bag of mixed salad, a piece of cheese and 4 conference pears. Tomorrow I may go liquid and have Pino Grigio and 20 fags.	0	0	0	0	1
GB-Reddit-20	Why not include TUV in this pole. Who's the best politician there???	0	0	0	0	0
GB-Reddit-21	Metal and total gays at the same time!	1	0	0	1	0
GB-Reddit-22	loreen's definitely winning, too many elderly gays phone voting for her not to when you combine it with those jury votes	0	1	0	0	1
GB-Reddit-23	who won or who is in pole position? I hope the Ukraine wins the contest	0	0	0	0	0
GB-Reddit-24	No pole on this stage set?	0	0	0	0	0
GB-Reddit-25	He’s one for the straight girls and gays 😂	0	0	0	1	0
GB-Reddit-26	Stale fag smoke, an overcooked (burnt) breakfast, Stella, boak and suncream. So like Benidorm basically.	0	0	0	0	0
GB-Reddit-27	the chippy, stella, crackhead piss and stale fags	1	0	0	1	1
GB-Reddit-28	No it’s absolutely not normal. It might be normal if his whole family has a drug problem but honestly I wouldn’t go near a family like that with a barge pole. You’re just asking for trouble 🚩🚩🚩	0	0	0	0	0
GB-Reddit-29	Wait, you're telling me that as a non-Pole I'm allowed to enter Polish shops?!	0	1	1	0	1
GB-Reddit-30	Poof buster (Phil) he once sat on a poofé (soft bean bag type thing) and it burst	0	0	0	0	0
GB-Reddit-31	This pole does not speak for all EU truckers. I wouldn’t worry about him.	0	0	0	0	0
GB-Reddit-32	I'm a food snob (wouldn't touch walkers with a barge pole) but pretty much all tescos own brand food is excellent these days I find.	0	0	0	0	0
GB-Reddit-33	Maybe visit a strip club and visit your fellow Poles? If you're lucky one of the women might even have a dance on you. Oi oi	0	1	1	1	1
GB-Reddit-34	It’s a pity these shops generally aren’t licensed to sell booze because the Poles do some very good beer.	0	0	0	0	0
GB-Reddit-35	Random thought if you put a dash between paki-Stan are being really racist to a guy name Stan	0	1	1	0	0
GB-Reddit-36	London’s safer than America but Manchester or Brighton are (slighter) cheaper and much nicer and have more accessible communities of queer and trans people.	0	0	0	0	0
GB-Reddit-37	im not trans, but i am a queer woman. thank you for putting yourself out there to try and help better educate our country!!!	0	0	0	0	0
GB-Reddit-38	I used to work as a barman in the ‘Washington’ Llandudno, it was gay night every Thursday, and it was always packed. There’s a lot of gays up north, they’re just spread out everywhere.	0	0	0	0	0
GB-Reddit-39	The bbc don’t give a shit about the safety of queer people. We’re headlines and targets and nothing more.	0	0	0	0	0
GB-Reddit-40	Amazing it took this long. It's soccer, a game full of the gays I'm sure.	1	0	1	1	1
GB-Reddit-41	Gays getting HIV - Sleep Straights getting HIV - Real shit	1	1	1	1	1
GB-Reddit-42	Jesus im one of those awful gays. I dont care . I literally fought to be proud of me and ill fight for his free speech.	0	0	0	0	0
GB-Reddit-43	I think people should just leave the ~~homosexuals about~~ gays alone. They aren't disturbing them. Just leave them alone. They are harmless.	0	0	0	0	0
GB-Reddit-44	Its not like it was entirely unknown that these people weren't straight. It is always good to have this sort of queer history spotlighted more though.	0	0	0	0	0
GB-Reddit-45	Beware of the gays..... They're fabulous.	0	0	0	0	0
GB-Reddit-46	Those gays	1	1	1	1	1
GB-Reddit-47	I told an American friend once online that I'll be right back and that I was off to smoke a fag. Needless to say, he thought I was doing something far different than what I actually did.	0	0	0	0	0
GB-Reddit-48	Does the person expect all musicals about gays to be called "Gay! A gay musical"?	0	0	0	1	0
GB-Reddit-49	“The samples won’t delay, but the cables—“ “There’s another way. Say something. Anything.” “I DIDN’T REALISE THIS SHOW WAS ABOUT GAYS!” “…anything but that.”	1	1	1	0	0
GB-Reddit-50	Wait, the gays have infiltrated musical theatre as well now? /s	1	1	1	1	1
GB-Reddit-51	I thought rent was awful. But it had nothing to do with gays and more to do with it being inaudible.	0	1	0	0	0
GB-Reddit-52	I had no idea Rent was about gays but it wouldn't stop me from enjoying it, if a story about gays is entertaining, i'm more than happy to be entertained.	0	1	1	0	0
GB-Reddit-53	Gays have cards? are they sparkly?	1	1	1	0	0
GB-Reddit-54	I'm getting *really* worried about the future of the SNP now and about Queer rights in Scotland.	0	0	0	0	0
GB-Reddit-55	Glasgow - Katie’s Bar, Delmonicas, Speakeasy, the Waterloo, Bonjour, Polo, AXM. They also have drag nights at the Cathouse. Also a great queer book shop in the southside called Category Is…	0	0	0	0	0
GB-Reddit-56	Yet we're still dithering lest we offend the God botherers. End this now.	0	0	1	1	0
GB-Reddit-57	If "the gays" are this powerful then they should be running the place.	0	0	0	1	1
GB-Reddit-58	Morgan freeman: there were, in fact, many gays.	0	1	0	0	1
GB-Reddit-59	The gays, THEY STOLE THE RAINBOW FROM US.... such a gay complaint	1	0	1	1	1
GB-Reddit-60	I'm queer, and i've never said "yass" in place of "yes".	0	0	0	0	0
GB-Reddit-61	cardiff here and yeah noone cares, legit be as queer as you want	0	0	0	0	0
GB-Reddit-62	Cannot prove existence of God Can prove some men like cock Gays win	0	0	1	1	1
GB-Reddit-63	Honestly whoever is directing it, the utilisation of women vs the queers* as the next episode of Culture Wars I'm really not loving it. *As one of them I allow myself to say that word folks.	1	1	1	0	0
GB-Reddit-64	Speaking as a lesbian, I have yet another reason to think facebook is a load of shit. &#x200B; I mean, I am literally a devil dyke.	0	0	0	0	0
GB-Reddit-65	I guess the story of the little Dutch boy who stuck his finger in the dyke/dijk wouldn't be acceptable then.	0	0	0	1	0
GB-Reddit-66	I (not a native speaker) thought the Devils part was offensive rather than the Dyke part... Now I know another word which I should never use!	0	0	0	0	0
GB-Reddit-67	And Boris already hates dykes	1	0	1	0	1
GB-Reddit-68	There was a british documentary series about Thai Ladyboys a while back. ( cant remember what Channel, probably 4 ). Really fascinating stuff. Not sure what their show would be about though?	0	0	0	0	0
GB-Reddit-69	I don't know why people are proud to be Nazi's, they *lost*. Why would you want to be associated with a bunch losers.	0	0	0	0	0
GB-Reddit-70	Nazi's claiming Churchill as their hero is like a poo worshipping toilet roll.	0	0	0	1	0
GB-Reddit-71	Look on the plus side... he hates Nazi's!	0	1	0	0	0
GB-Reddit-72	I'm thinking something involving faggots.	1	1	1	1	1
ZA-YouTube-0	We blacks must stop 🛑 visiting white owned resorts , they only want your money, while they see you as Monkey 🙈	0	1	1	1	1
ZA-YouTube-1	Who can imitate a mumu like Malema, he is not even a South African, this is why he behaves like his kwerekwere brothers and sisters. He thinks everyone is a prostitute and drug addicts.	1	1	0	1	1
ZA-YouTube-2	But k don't blame them kwerekweres March and demand also.Why can't they	0	0	0	1	0
ZA-YouTube-3	Do away with race classification, jobs for all, rainbow 🌈 nation	0	0	0	0	0
ZA-YouTube-4	Affirmative action turned the rainbow 🌈 completely black.	1	1	1	0	1
ZA-YouTube-5	@USER I've always thought that letting a terrorist group run our country was a bad idea...	0	1	0	1	0
ZA-YouTube-6	Wow. Rainbow 🌈 turned completely black😅	0	0	0	1	1
ZA-YouTube-7	Yes. 100 percent correct. Rainbow 🌈 turned completely black😅	0	0	0	1	0
ZA-YouTube-8	America is terrorists	1	0	1	1	1
ZA-YouTube-9	The arrogance, sanctimonious and self-righteous attitude displayed by farmers who stole land rejecting compensation from the very people they wronged. Even satan is in awe.	0	0	0	0	1
ZA-YouTube-10	You’d swear white people are a living Satan the way they resold in this comment section. They act like devils or possessed	1	1	1	1	1
ZA-YouTube-11	Killl the BOER the FARMER!!!!! BRRRR POW! POW!	1	1	1	1	1
ZA-YouTube-12	He's right. I have to work with Boers in Australia and they deserve anything they get.	1	1	0	0	1
ZA-YouTube-13	😂😂 Sings kill the boer. While the boer protects him. Brains uziko	0	1	0	1	0
ZA-YouTube-14	Every Boer needs a job unfortunately. 😂	0	1	1	0	0
ZA-YouTube-15	Iff you wound stop the song kill the farmer kill the boer than whe will sing kill the joutkop kill the blacks is that ok with you malema	1	1	1	1	1
ZA-YouTube-16	Lol, guess he will meet the boers who killed his ancestors. 😂	0	1	1	1	0
ZA-YouTube-17	This man is a terrorist aiming to divide our nation and encite violence while he rakes in millions and lives in luxury we are dying. He is worse than Robert. Wake up people. Get rid of this dictator	0	0	0	0	1
ZA-YouTube-18	When Penny Sparrow wrote about blacks as monkeys she was fined R150000 The judge who said that Malemas rhetoric is not hate speech is either very sick or eff member	0	0	0	0	0
ZA-YouTube-19	YOU DELUSIONAL COLONIZER YOU DONT EVEN BELONG ON THE LAND. YOU'RE THE ONLY TERRORIST YOU PALE HYPOCRITE	1	1	1	1	1
ZA-YouTube-20	BE CAREFULL IT DOESNT BACK FIRE ON THE EFF,AND THAT THE BOER KILLS THE ONES SING THIS SONG. EVEN THE COURTS ARE ON THE EFF SIDE ,THIS WILL START VERY SERIOUSE ACTIONS AGAINST THE EFF.	0	0	0	0	1
ZA-YouTube-21	😊 i like the version of kiss 💋 the boer kiss the farmer	0	0	0	0	0
ZA-YouTube-22	Why cant they sing love the boer? It is not about freedom it is about unity! It does stir violence. They are provoking violence. The boer will defend themselves.	0	0	0	0	0
ZA-YouTube-23	Kill the boer heah 🎶🎶🎶🕺🕺🕺	1	1	1	1	1
ZA-YouTube-24	let him sing . He is uniting the boers again .	0	0	0	0	0
ZA-YouTube-25	Yes...'Kill the Boer Kill the Farmer' ✊🏾	1	1	1	1	0
ZA-YouTube-26	This song really escalate violence,the meaning is clear,no translation needed,if the Boers can call us Kafirs are we gonna be happy,being called that?	0	0	1	0	0
ZA-YouTube-27	Before you guys forget, kiss the boer kiss the farmer, we will sing it and make it amapiano	0	0	0	1	0
ZA-YouTube-28	If the eff says dont take this song literally then we can also sing along " kill the boer kill the farmer and the farmworkers ...and shoot to kill..nothing wrong with that 🤔	0	1	0	0	0
ZA-YouTube-29	For you saying a political party celebration is a terrorist gathering will cause them to terrorize you. Your way of thinking is questionable.	0	0	0	0	0
ZA-YouTube-30	If you are complicit in terrorist activities than that is what you are. You cant say farm murders are crimes. Its terrorist activities that target white people and white farmers.	0	1	0	0	0
ZA-YouTube-31	So what about the old flag that allso an old fag but banned why that is only a emblem but to me kill a boer means you can kill a boer thats ok.	1	1	1	1	1
ZA-YouTube-32	How can you say singing kill the blacks is not ok but kill the boer is fine. Jy kan baie k@USER praat neh.	1	0	1	0	0
ZA-YouTube-33	Uncultured kill the boer singer😂	1	0	0	0	0
ZA-YouTube-34	Terrorists are terrorists. They have no country. Raise public awareness against the terrorists and help the police to take stern actions against the terrorists.	0	0	0	0	0
ZA-YouTube-35	Ey... those ones are the biggest terrorists, these NGO's have an underlying agenda with SA	0	1	1	0	0
ZA-YouTube-36	ANC doesn't care about our safety and security everyone just flock to SA even terrorists are here 😭😭😭😭	0	0	0	0	0
ZA-YouTube-37	Detain and deport all kwerekwere diplomats, and sever all ties with kwerekwere jungle governments	0	1	1	1	1
ZA-YouTube-38	@USER I'm not South African. I'm a stinking kwerekwere from zimbabwe.	1	0	1	1	1
ZA-YouTube-39	Yea them Boers are still here since 1652 but no attack on Dem lol😂😂😂😂	0	0	0	1	0
ZA-YouTube-40	Bob, we've never interfered in the affairs of your country, so shut that kwerekwere mouth of yours!	1	1	1	1	1
ZA-YouTube-41	Even the boers thought we were domkops until June 16 happened and there was no turning back!	0	1	1	0	0
ZA-YouTube-42	Nonsense is your president in kwerekwere country hamba we don't care go home	0	1	1	1	1
ZA-YouTube-43	At least there's no crooked ministers always wanting to eat	0	0	0	0	0
ZA-YouTube-44	Soon only the monkeys will be left at the circus	0	0	1	0	0
ZA-YouTube-45	Haibo ma sasafrika amahle R300 only? They should do better. I would pay at least 5 figures for that. I guess since the Pakistanis were not Kwerekweres or foreigners they got a huge discount 😂	0	1	1	1	1
ZA-YouTube-46	@USER yeah,I’m having a threeway with Satan and Lucifer	0	0	0	0	0
ZA-YouTube-47	@USER you respect satans homophobic community???????	0	0	0	1	1
ZA-YouTube-48	@USER yes we understand ur need to support satan. Shame you like satan though this much to support the Devil this way.	0	0	0	0	0
ZA-YouTube-49	he is wrong for doing satans work	0	0	0	0	0
ZA-YouTube-50	@USER you are wrong as you knew and your not a real christian so .... who cares what you say old bean? Go pray to satan as you do sound as if u do anyway.	1	0	1	1	1
ZA-YouTube-51	​ @USER kwerekwere really? When racists are kicking your but in South Africa. You need to learn and educate yourself about who you are, you are lost.	0	0	1	1	0
ZA-YouTube-52	haa Malema didn't you say you have joined the Lamba Jews? what are the Lamba Jews views about this?	0	0	0	0	0
ZA-YouTube-53	We want our rainbow back 😢 Eff is for gays, only gay people must vote eff.	1	1	1	1	0
ZA-YouTube-54	Rights ,hahahahaa what bullshit this rainbow bullshit.	1	0	1	0	0
ZA-YouTube-55	What about the rights of Christians. The rainbow belings to God not the gays	1	1	1	0	1
ZA-YouTube-56	If you want to be stupid go to west not in Africa no room for homosexual in Africa ✊✊✊	1	1	1	1	1
ZA-YouTube-57	Nazi fascist kukluxklan criminals genocidal USA NATO uk Israel Ukraine. These demon satan worshipers FOLLOWERS must be neutralized.	1	1	1	1	1
ZA-YouTube-58	no one cares... Long live Uganda !!! Stand strong Africa. Protect the children from the rainbow mafia. 🫡	0	1	1	0	1
ZA-YouTube-59	"Shame poor man,, Satan took over in our lives...😭😭🙏🏽	0	0	0	0	0
ZA-YouTube-60	Hahahahaaaaaa and you stupid people don't understand how come south africa is such a cursed country! Keep on hating Israel and being jealous of the Jews 🎉🎉🎉🎉😂😂😂😂😂😂	1	1	1	1	1
ZA-YouTube-61	You Ashkenazi are being punished by Yah. Fake Jews	1	1	1	1	1
ZA-YouTube-62	Has everyone forgotten that Hamas is an officially recognised terrorist organisation by the UN ???	0	0	0	0	0
ZA-YouTube-63	@USER Hamas is like our ANC back in the day. They are not terrorists. ISIS is a terrorist org. Not Hamas they are the only source of defence	0	0	0	0	0
ZA-YouTube-64	dont forget, umkhonto we sizwe who was tasked with fighting the Apartheid government, was also seen as terrorists	0	0	0	0	0
ZA-YouTube-65	Russia on the border of Ukraine. Jews vs Christians and Muslims in Jerusalem. Chinese want to take Tawian back , difficulty with Australia as well. Stay safe all.	0	0	0	0	0
ZA-Reddit-0	As a rule-of-thumb, what monkeys eat is safe for humans. SA has a lot of monkeys.	0	0	0	0	1
ZA-Reddit-1	It’s because they’re being trained in Pretoria by Jews to be [snipers](URL)	0	0	1	0	0
ZA-Reddit-2	Reading this thread has turned me into a communist, the morality and values of rich Boers is some real upside-down twisted shit lmao	0	0	1	1	1
ZA-Reddit-3	Monkey see monkey do. We are sheep and are driven by clicks. Even if we like to think you have an original thought in your mind, you don't. An unfortunate reality that won't change for years.	0	0	0	0	0
ZA-Reddit-4	Hotnot is the insult	0	0	0	0	0
ZA-Reddit-5	Hottentots Holland is the name of the HS i went to and the name is unchanged so im guessing, NO.	0	0	0	0	0
ZA-Reddit-6	I had no idea "rainbow donut" was a thing	0	0	0	0	0
ZA-Reddit-7	The rainbow is a lie.	0	0	0	0	0
ZA-Reddit-8	This is a very sweet message, thank you for posting, OP. Wishing you a lovely week ahead. <3 But now you've made me wish for a rainbow doughnut and my fat ass can't stop thinking about it. xD	0	0	0	0	0
ZA-Reddit-9	As a South African white male, your age. Trump is a cunt. And an idiot	0	0	0	0	1
ZA-Reddit-10	Just like Jews are white when it suits them, and Jews when it doesn't.	1	1	1	1	1
ZA-Reddit-11	Cape Town has so many of these dumb cunts in their Volkswagens	0	0	0	0	0
ZA-Reddit-12	Maybe "Kill the boer, Brr Paa Paa" didn't give the world confidence of stability of SA economy. They dont seem to see it as a struggle chant instead of a statement of intent.	0	0	0	0	0
ZA-Reddit-13	Elon Musk tweeted about the EFF's Kill the boer.	0	0	0	0	0
ZA-Reddit-14	Definitely has to do with “Kill the Boer” Rand is weakening, even to the Euro. As it seemed to be getting stronger something happens again.	0	0	0	0	0
ZA-Reddit-15	That boer pampoene song always hits definitely watch the music videos Berry hoener Bob Jan And maybe captuin van die syler	0	0	0	0	0
ZA-Reddit-16	Poplak: you are a disgusting sack of molding shit. How that for ‘satire’, you urban son of a toothless whore?	0	0	0	1	0
ZA-Reddit-17	A Jew talking about genocide , no surprise there	1	1	1	1	1
ZA-Reddit-18	Poplak's other quote should get more attention: Singing “Kill the Boer” while wearing Gucci loafers is just cosplay by a racketeer masquerading as a politician.	0	0	0	0	0
ZA-Reddit-19	Amazing. Kudos to the Poles. Fuck these ANC cunt nuggets.	1	1	1	0	1
ZA-Reddit-20	We don't really give a fuck what you're into, aslong as it doesn't influence me or my kids lives. Do your thing cunts.	1	0	0	0	0
ZA-Reddit-21	I said yes, because fuck that murderous cunt.	0	0	0	0	0
ZA-Reddit-22	\>afriforum>right wing for fuck sakes... edit: "kiss" the boer.. for fuck sakes....!	0	0	0	0	1
ZA-Reddit-23	Terrorist is not the right word anymore, it just describes a part of their character. They have expanded in mean time.	1	0	0	0	0
ZA-Reddit-24	How are these dumb cunts so fucking retarded	0	1	1	0	0
ZA-Reddit-25	At what stage do we declare the EFF a terrorist entity? It should have happened 8 years ago.	0	0	0	0	0
ZA-Reddit-26	I would also recommend Moffie	0	0	0	1	0
ZA-Reddit-27	Let me just make sure I'm getting this. Posting a video of a monkey breaking tiles off a roof and captioning it with, "eff takeover", is a no no, right?	0	0	0	1	0
ZA-Reddit-28	Hypothetically, what about calling the DA monkeys? No go I assume?	0	0	0	1	0
ZA-Reddit-29	"... Saying they [The DA] should be shot isn't" The court ruled that "Shoot the Boer" is protected speech.	0	0	0	1	0
ZA-Reddit-30	The bad guys are always "terrorists" aren't they?	0	0	0	0	0
ZA-Reddit-31	Wait, what? Why are South African soldiers fighting terrorists in Mozambique???	0	0	0	0	0
ZA-Reddit-32	Are they looking for ISIS terrorists?	0	0	0	0	0
ZA-Reddit-33	Anyone remember how a few months ago r/southafrica was convinced that sending troops to Moz would result in tons of terrorist attacks?	0	0	0	0	0
ZA-Reddit-34	Why are people in this thread arguing what we should name the terrorist groups? Lmao it seems agressively pointless	0	0	0	0	0
ZA-Reddit-35	Nobody else mentioning anywhere the fact that the ANC are nothing more than a bunch of terrorists and have been terrorising the people of this country for decades.	0	1	0	0	1
ZA-Reddit-36	What a shit terrorist can you be if anyone knows more or less when you are arriving? Sounds like something the EFF is capable of arranging.	0	0	1	1	1
ZA-Reddit-37	😭 Why us we already have enough issues, doesn’t make sense, which Terrorist groups are active in SA ?	0	0	0	0	0
ZA-Reddit-38	You think the ANC would have sympathy with not wanting to be caledon a terrorist organisation	0	0	0	0	1
ZA-Reddit-39	Who are/is the “terrorist” you’re referring to in the title	0	0	0	0	0
ZA-Reddit-40	They're not terrorists they're fReEdOm FiGhTeRs. Just like how when the ANC necklaced BLACK people they were freedom fighters, or when they bombed innocent civilians.	1	1	1	0	0
ZA-Reddit-41	If I were a terrorist and planning an attack in Sandton, then read in the news that they knew about it, I would just change areas. So Sandton is probably the safest place this weekend	0	0	0	0	0
ZA-Reddit-42	It's equivalent to Boy, Darkie, Preet, K word, Chink &China, also not excluding boer and colonisers. It's not just one derogatory word it is a collective group	0	0	1	0	0
ZA-Reddit-43	I remember "coolie creepers" in Eastern Cape. Kinda like a googly I think in cricket. Anyone else?	0	0	0	0	0
ZA-Reddit-44	Indian here. Calling us charous, bread ous, slam ous porridge ous are fine. Never coolie/ koolies unless you wanna get smacked and booted.	0	0	0	0	0
ZA-Reddit-45	Possibly coconut-ice.	0	0	0	0	0
ZA-Reddit-46	Could be coconut ice if it has coconut flakes in it.	0	0	0	0	0
ZA-Reddit-47	Coconut worms. Delicious.	0	0	0	0	0
ZA-Reddit-48	I'm European and yeah whats up with that? All i learned about africa was about the first monkey humans, and then egypt slave times.	1	1	1	1	1
ZA-Reddit-49	A crisis created by you amd yours and your chommies in the ANC fix your own fuck ups, oh yes, I forgot, you're too fokken dom. Full of hot air and nothing else, get fucked cunt.	1	0	0	1	1
ZA-Reddit-50	Satan Africa	1	1	1	1	1
ZA-Reddit-51	Why would Boers fighting the English use a union jack in their flag? Use a Vierkleur or a Transvaal flag, lol.	0	0	0	1	0
ZA-Reddit-52	Boer maak n’plan. Look, I don’t know when you need to action your plan, but you need to have a plan. You may also want to explore options for moving to WC.	0	0	0	0	0
ZA-Reddit-53	How long before the racist apologists crawl out to claim Boer actually means cop or Kill the Boer means overthrow the system??	0	1	1	0	1
ZA-Reddit-54	"Kill the Boer" is blatant hate speech and Americans should focus on their own problems.	0	0	0	1	0
ZA-Reddit-55	Can Boers sing "Kill Malema"?	0	0	0	1	0
ZA-Reddit-56	Kill the boer is a struggle song it'll remain that way, whether you like it or not.	0	0	0	0	0
ZA-Reddit-57	I wonder when people will recognize the EFF for what it really is. It's not a political party, it's a terrorist organization.	0	0	0	1	0
ZA-Reddit-58	When he says “boer” who exactly is he referring to in this context? All Afrikaans people? All White people? Farmers? All the above?	0	0	0	0	0
ZA-Reddit-59	You won't catch a boer in American overalls.	0	0	0	0	0
ZA-Reddit-60	The AI knew to give a boer seun a Mauser.	0	0	0	0	0
ZA-Reddit-61	Few people know that the concentration camp concept which was widely used in WW2 by the nazis was first perfected in South Africa during the Boer war's by the British.	0	0	0	0	0
ZA-Reddit-62	The Boers gave them a good run for their money on biltong and rusks. Edit : /s just in case.	0	0	0	0	0
ZA-Reddit-63	> Turns out Conor McGregor was a South African army general during the Boer War. Picture from the 30s: FTFY. I think.	0	0	0	0	0
ZA-Reddit-64	See it this way. If the word boer was replaced with a religious, ethnic, or social group would it be seen as okay to sing? Would it even be a debate?	0	0	0	0	0
ZA-Reddit-65	That's a cult. Also I'm a white south african. These ouens are kak, cunts.	1	1	1	0	1
ZA-Reddit-66	Apparently, Julius replied with masepa (cunt) to Elon Musk Watch how Julius account gets banned from X. Elon should ban all political parties from X	0	0	0	0	0
ZA-Reddit-67	Just don't call him a monkey, literally, or illiterately, for that matter. You'll go to jail, literally, even if if you did not mean he is a literal monkey.	0	0	0	0	0
ZA-Reddit-68	Aaaah fuck. I read Boer War Recommendations..... As if where to hold it..... Well have a nice read.	0	0	0	0	0
ZA-Reddit-69	So when do the sing kill the boer in this video ?	0	1	0	0	0
ZA-Reddit-70	EFF is a terrorist organization know doubt. Why was the white women trying to stop it by herself, just call the cops.	1	1	0	1	0
ZA-Reddit-71	This is what happens when BEE is brought into academia. "You must not ask a monkey to do a lion's job." Kenyan proverb.	0	0	1	1	0
ZA-Reddit-72	Hey PIC stop being racist cunts	0	0	0	0	1
ZA-Reddit-73	This is sad that farmers ask for this. The fact that the fat cunts in the ANC is so obsessed with themselves that all the police are patrolling their houses.	0	0	1	1	1
ZA-Reddit-74	What about if we listen to all the experts, and not just a few? Perhaps the OP is a stupid cunt? And can't think critically?	0	0	0	0	0
ZA-Reddit-75	Wow a brand new Homo, a lot of them have been found in South Africa	1	1	1	1	1
ZA-Reddit-76	so, kill the boer...except if he's gay. strange, but im sure my white brothers and sister will appreciate it.	1	1	1	1	1
ZA-Reddit-77	The same reason the government is not labeled as terrorists/criminal organisation	0	0	0	0	0
ZA-Reddit-78	Attention whore, nothing more. Maybe he'll get a rugby game when this is all over, but I doubt it.	0	0	0	0	0
ZA-Reddit-79	This is silly, you think they would travel all the way to conduct terrorist attacks.	0	0	0	0	0
ZA-Reddit-80	Not going to lie that unicorn lunch box from Satan sounds like a vibe🤣 gave me a good chuckle!	0	0	0	0	0
ZA-Reddit-81	What's so EFFing special about you EFFing Jews?	1	1	1	1	1
ZA-Reddit-82	Leaving aside the fucking BIZARRE comment about Jews, Julius is apparently now making it clear that he's opposed to mandatory vaccines. I find it interesting how little reaction this has drawn.	0	0	0	0	0
ZA-Reddit-83	I agree...bugger that...my mom used to say it until I told her what it means...anyway...I have nothing to do with Jews said my Dad during WW2...	0	0	1	0	0
SG-YouTube-0	I am Singaporean Chinese buti love my china Chinese mate	0	0	0	0	0
SG-YouTube-1	@USER those day we are living in Ang mo chu, not adap chu.	0	0	0	0	0
SG-YouTube-2	@USER fir jab masjid hum tod denge fir mat rona 😂😂😂😂	0	0	0	0	0
SG-YouTube-3	These scammers scam our moneys, so please do not give in to china demand for the moneys, heard they sending a vice minister here for their illegal gains.	0	1	1	1	1
SG-YouTube-4	Send back pinoy manager send alllll back pinoy	1	1	1	0	1
SG-YouTube-5	Farah kong pinoy is goood worker so call. most of them Prefer their own kind when come hired	1	1	1	0	1
SG-YouTube-6	Indian 🇮🇳 workers are smarter, cheaper, and 10 years younger than the Chinese counterparts. - Who wouldn't love that?	0	1	1	1	1
SG-YouTube-7	@USER asshole see china and usa first	1	0	0	0	0
SG-YouTube-8	Well done 👍 China 🇨🇳 Taking revenge by virus 🦠 from Indians	1	1	1	1	1
SG-YouTube-9	all assembled chinese parts 😂	0	1	0	0	0
SG-YouTube-10	Lol xi claims south china sea part of Malaysia Indonesia had birder disputes with Kazakhstan and what not.	0	0	0	0	0
SG-YouTube-11	other way around, Chinese will exit Brics as the members are all close to India than to loan shark China. 😁	0	0	0	1	1
SG-YouTube-12	Boy..what a question is that…u can do nothing about it can u…India too can have its own map that irritates china ..and china can do nothing about it.	0	0	0	0	0
SG-YouTube-13	No worry China gov has so much money	0	0	0	0	0
SG-YouTube-14	Singapore take note: China party central will take back the money that moved to Singapore from Hong Kong. It is Chinese money. Also stop making bad news about China	0	0	0	0	0
SG-YouTube-15	I giggle when I hear China struggles	0	1	0	1	0
SG-YouTube-16	Ghost cities are everywhere in china, even a decade ago. So why are home buyers of Chinese builders surprised when their houses are not completed and become ghost cities!?	0	0	0	0	0
SG-YouTube-17	Correct, But those China ha-te here are so happy 😅	0	1	1	1	0
SG-YouTube-18	the chinese are risk adverse, wont go to war unless absolutely necessary, they think long game, if china wanted to, it could create miitary parade ten times size of north korea	0	0	0	0	0
SG-YouTube-19	People who respect humanity, not USA , killing people for nothing, quenching for blood, China will takeover Usa soon.	1	1	0	1	0
SG-YouTube-20	@USER The Chinese people all agree that China is and will always be a developing country	0	0	0	0	0
SG-YouTube-21	north korea vibe XD china and north korea are like twin commies	0	1	1	0	1
SG-YouTube-22	Russia China and north Korea can start the ww3 soon	0	0	0	0	0
SG-YouTube-23	Maybe the genius thinks an American and indian alliance is in the best interest of china lol	0	0	0	0	0
SG-YouTube-24	@USER lol china done it, what you do on that map?	0	0	0	0	0
SG-YouTube-25	Singapore will not follow like other Countries to impose TRAVEL RESTRICTIONS TO CHIA CHINESE PEOPLE	0	0	0	0	0
SG-YouTube-26	Pls Malaysia does not discriminate against China. It’s for all foreign entry into Malaysia. Don’t lump us with the China haters	0	0	0	0	0
SG-YouTube-27	Why??? China has zero transparency on Covid so expect restrictions and bans!!	0	0	0	0	0
SG-YouTube-28	This 3 January Malaysia close border to China tourist..	0	0	0	0	0
SG-YouTube-29	Singapore govt is always Tunggu, nanti and then mati 🤣	0	0	0	0	0
SG-YouTube-30	they are angry because their plan to infect the world is being checked? these chinese must stay in china!	1	1	1	1	1
SG-YouTube-31	@USER As long you have Chinatown in your country CCP will said your country is part of China. Same as Taiwan just because they speak Chinese and sharing food similarity they are part of China.	0	0	0	0	0
SG-YouTube-32	In time to come, mainland Chinese would be considered like pariahs, given the CCP mismanagement of Wuhan virus. CCP refuse to cooperate with the world on transparency of information	0	0	0	0	0
SG-YouTube-33	Many are relatives of china government officials. Thailand should give china a list of buyers so that proper tax levied against them or send those govt officials to jail	0	0	0	0	1
SG-YouTube-34	Bangladesh, India, China FLoods	0	0	0	0	0
SG-YouTube-35	I am proud of sg policies. Bangla today, then PR then citizen . They are most likely muslims can help increase sg population and maintain the muslim ratio	0	0	0	0	1
SG-YouTube-36	@USER chibai you eat babi at hawker centre, they got put headcover anot	0	0	1	0	1
SG-YouTube-37	Zero Tolerance for radical Religous terrorists ideology Acts.	0	0	0	0	0
SG-YouTube-38	Lawrence looks stressed… 😂 he’s expected to speak in Malay and mandarin	0	0	0	0	0
SG-YouTube-39	Just put Malay is enough what... Why need to put the "Singapore" in it... Haiya, simple thing become complicated.	0	0	0	0	0
SG-YouTube-40	@USER oh really? Then explain why chinese ethnics cannot buy lands in Jogjakarta?	0	0	0	0	0
SG-YouTube-41	Malaysia is for everybody. We have millions of Indons bangkaideshi Rohingyas Burmese Pinoys Vietnamese or the Africans..be it legal or illegal. They made this country as theirs now. What a blessing.	0	0	0	0	0
SG-YouTube-42	The only way for a Chinese to be PM of Malaysia is by voting for PH✅. For a new Malaysia❤	0	0	0	0	0
SG-YouTube-43	@USER Since when Singapore belong to Chinese? If so why do we have Malay and Indian MPs?	0	0	0	0	0
SG-YouTube-44	@USER You were claiming Chinese schools = promote Chinese? Since when? So is Ahmad Ibrahim Sch promoting Malays? Hilarious claims.	0	0	0	0	0
SG-YouTube-45	@USER We do have Malays in Airforce or Navy. Just fewer.	0	0	0	0	0
SG-YouTube-46	Let all those capable lead the country. Respect the Malays, love thy country, we only live once on this earth.	0	0	0	0	0
SG-YouTube-47	Not when u have terrorists groups breeding like crazy….. they are overwhelming the progressing and peace loving malays now.	0	1	1	1	1
SG-YouTube-48	why malay?do you know that singapore malay are actualy jawa majority?	0	0	0	0	0
SG-YouTube-49	@USER LHL leaps and bounds better than his father. Till today, I cannot stomach LKY's comments on Malays and how he's eroded our identity. If he's here today high chance kena cancelled.	0	0	0	0	0
SG-YouTube-50	I worry that one day it is a must to be gay as society becomes gay…	1	1	1	1	1
SG-YouTube-51	@USER the coin phrase actually is "pink money" that mostly derives from gay tourism. Of course, it would have to be a country or region that's accepting of homosexuals.	0	0	0	0	0
SG-YouTube-52	Step 1 accomplished soon 🔜 step 2 😮 Gay marriage	1	0	0	1	0
SG-YouTube-53	I walk at my market every day , i heard some uncle say " SI ALL CHAO AH GWA " in chinese . Cause i'm gay too . I feel so sad .	0	1	0	0	0
SG-YouTube-54	They should move to Singapore Chinese is prioritize there.	0	0	0	0	1
SG-YouTube-55	A Chinese free UK is a better UK.	1	1	1	1	1
SG-YouTube-56	The weird thing is his victimes are straight men not gay and he said he want to make them gay because he want them to be free from their monsters girlfriends	0	1	0	1	1
SG-YouTube-57	@USER emang in Indonesia most of the people are Homophobic, Try gay people in Brunei they have been killed	0	1	1	0	1
SG-YouTube-58	Cos the Court has been challenged by Talented Gay lawyers...no one dare to challenge the court till now..cos it violates equal protection provision	0	1	0	0	0
SG-YouTube-59	Think the government should still stay put with what they have then to look into this area. But now they are encouraging gay community.	1	1	0	1	1
SG-YouTube-60	Next GE, we will hv a NMP to represent these Ah Gua in parliament.	0	0	0	0	1
SG-YouTube-61	@USER Gay Talents are challenging the law...now that talented lawyers are coming out..	0	1	0	0	1
SG-YouTube-62	So, an Iraqi refugee, in Sweden, burns the ISIS Terror Manual....And that´s a bad deed?	0	0	0	0	0
SG-YouTube-63	to talk against China he must have balls of titanium	0	0	0	0	0
SG-YouTube-64	The problem of Osama Bin Laden was also his personal problem and it was made a world problem۔ Due to which thousands of people died.	0	0	0	0	0
SG-YouTube-65	Communist China and Xi burn Qur@USER each day	1	1	1	1	1
SG-YouTube-66	Bro religion did play in politics China for “past 2000 years” what is Confucianism and mandate of Heaven? Bro doesn’t even know history and China only recently become officially atheist	0	0	0	0	0
SG-YouTube-67	PAS makes Chinese know their place	1	1	1	1	1
SG-YouTube-68	@USER That's what I do not understand. SG dollar is 3 times more than ringgit but the Malaysian Chinese refuse to migrate. What more do these people want?	0	1	0	0	1
SG-YouTube-69	Tel that girl to go to Iran, they'd love her there! Now I understand China's Xingjiang policy, China doesn't want nonsense to stop her progress.	1	0	1	1	1
SG-YouTube-70	@USER You just lost your job to a bangla right ? I understand ,i lost mine too but i want to show to the church ,temple & mosque i am happy. Have 2 beers and stop cursing .🥰🥰🥰🥰🥰🥰🥰🥰🥰	0	0	0	0	1
SG-YouTube-71	Unfortunately UN and other countries not responding on the Hindu terrorists in India.	0	0	0	0	0
SG-YouTube-72	Just to fill up the quota for chinese woman. That's all.	1	1	1	0	0
SG-Reddit-0	Wow, that whole section on Singaporeanisms/dialect terms. "We may speak Chinese, but we're not China Chinese" in a nutshell.	0	0	0	0	0
SG-Reddit-1	Is it just me or the malay portion is so positive then the Chinese portion like kena scolding	0	1	0	1	0
SG-Reddit-2	Wah Malay portion over so soon. Could listen to him go all day	0	0	0	0	0
SG-Reddit-3	friends stall is 30k a month a few years ago after the big reno. i cant find my old pinoy stall anymore	0	0	0	0	0
SG-Reddit-4	So with the repeal of 377A, married men are going to church to have gay sex?	0	1	1	1	1
SG-Reddit-5	Looks like no one ever bothered to ask the atheists and agnostics what they thought about the homos and assumed they are all godless hedonists too.	1	1	1	1	1
SG-Reddit-6	I don't know what kind of shit the prc propaganda are feeding our boomers, I feel like my father is slowly becoming your father.	0	0	0	0	1
SG-Reddit-7	Why critical of Taiwan if it's part of PRC 😂😂	0	0	0	1	0
SG-Reddit-8	1) Do your NS 2) Plenty of people on this sub alone are saying we should stop using cheap labour and bangla slaves, so don't act like nobody has a problem with this.	0	1	0	0	1
SG-Reddit-9	When she pulls the I have Malay and Indian friends card you know what's going down	0	0	0	0	0
SG-Reddit-10	this the type of person that refer to a malay person as yalam dog. or kiao tor.	0	1	1	1	0
SG-Reddit-11	KNN don’t come and bullshit you commie ah tiong, you the 30F with the throw-away account write essay one right KNN CB LMFAOOOOOO	1	1	1	0	0
SG-Reddit-12	Need homos to contribute to GDP	1	1	1	1	1
SG-Reddit-13	being in ns with majority malay made me hate malays with a passion.	1	1	1	1	1
SG-Reddit-14	I hope our isd monitor those who go and protest in the embassy. Those jokers are potential Terrorist who were brainwashed.	0	1	0	1	1
SG-Reddit-15	> insulting people who oppose LGBT rights as retarded + comparing them to ISIS. They are. Imposing your own cultures view on others doing NOTHING wrong. ISIS behaviour	0	1	1	1	1
SG-Reddit-16	Indian style Prata? Malay style Nasi Lemak? Chinese style Hor Fun? Eurasian style Shepherd's Pie? Doggy style beas......	0	0	0	0	0
SG-Reddit-17	The attitude of Malays being “holier than thou “ is kinda sickening . Have experienced it many times , sadly it’s not gonna stop .	0	1	1	1	1
SG-Reddit-18	Talking about malay muslim struggles what do you all put when documents asked for full names? If i put my father's name they always messed it up.	0	0	0	0	0
SG-Reddit-19	I propose that new citizens and PRs pass a Malay language test instead.	0	0	0	0	0
SG-Reddit-20	There's only about 180000 pinoys in sg.	0	0	0	0	0
SG-Reddit-21	Lmao that dumbass mat yoyo. Which halal place in the whole world sells pork as well? This kambing never read his qoran properly	1	1	0	1	0
SG-Reddit-22	And then Malays get a leg up in education via state funded Mendaki	0	0	1	0	0
SG-Reddit-23	Thought this guy is gay too? Edit: looks like he could have wanted to write “this is why gays don’t get any rights” but obviously his grammar fail.	1	0	1	0	0
SG-Reddit-24	bilibili is another site with pretty interesting comments by PRCs. Sometimes I like to see the comments on their lianhezaobao page	0	0	0	0	0
SG-Reddit-25	Ah Tiong don’t work as construction labourer already. The pay not enough to bring them over. Most probably are supervisors	0	0	0	0	0
SG-Reddit-26	I think it's the Chinese from PRC who get super-defensive about Sinovac. Local Singaporean Chinese either don't care or are actively avoiding Sinovac.	0	0	0	0	0
SG-Reddit-27	Bangla boys are hot stuff to Indons and Pinoy maids.	1	0	1	1	0
SG-Reddit-28	Why doesn't he ask why SMRT CEO is always a former SAF general? By the way, just curious whether in the first place is there an application submitted by the Malays for the interns?	0	0	0	0	0
SG-Reddit-29	Malay-Muslim people of r/Singapore is this a big issue for you guys ? Not being sarcastic. I am genuinely wondering.	0	0	0	0	0
SG-Reddit-30	Geylang is huge. Geylang Serai is mostly halal, while the rest is haram af.	0	0	0	0	0
SG-Reddit-31	Means the neighbour don't like him 🤣 My Malay neighbour always cook for my family and bake cookies. We can't cook so we just buy cookies during CNY.	0	0	0	0	0
SG-Reddit-32	Try import a ah tiong to be your next PM. See what happens next ...lol	1	1	1	1	1
SG-Reddit-33	These PRCs are funny, in Europe they never pay hotel rent, get chased out, yet shout for help and questioned about human rights. Said Anti Japan, yet they visited there most.	0	1	1	1	1
SG-Reddit-34	Why so pressed about babi? Just say no lol	0	0	0	0	0
SG-Reddit-35	Lol this is actually quite accurate *laughs in Malay*	0	0	0	0	0
SG-Reddit-36	I don't care if you're gay or straight or anything else, the only PDA I want to see in public is the XDA.	0	0	0	0	0
SG-Reddit-37	Eh, you wanna watch this movie about this superhero who talks to fish or not, this Ah Gua Man?	0	0	0	0	0
SG-Reddit-38	Probably also the same person that thinks you’ll turn gay if you eat rainbow cakes.	0	0	0	0	1
SG-Reddit-39	I don't recall coming out but I recall the nicknames. Sissy, aqua, giraffe	0	0	0	1	0
SG-Reddit-40	Not sure where you learnt this but I don’t think you’ll be put behind bars if you’re gay. Gay or not, we’re still human. We’re all equal. 🙂	0	0	0	0	0
SG-Reddit-41	You don't go to jail for being gay lmao. There is a law that criminalizes sex between 2 males but it's not enforced.	0	0	0	0	1
SG-Reddit-42	But gay sex can potentially allow 12 inch social distancing	1	1	0	1	1
SG-Reddit-43	Why not get the best of both world? Marry a tranny?	1	1	1	1	1
SG-Reddit-44	Yes i get that gay meant happy lol	0	0	0	0	0
SG-Reddit-45	I really appreciate that no fag sign used in this scene, they should have it more irl. Reminds people not to bring fags into stores because I hate it when they do	1	1	0	1	1
SG-Reddit-46	Gays are still human. From here you can see the black gay being a dick to Mr Kim while the other gay is understanding. Be like Mr Kim. You do you, I do I.	0	1	0	1	0
SG-Reddit-47	Complaining regardless of what the government does is not a gay thing, it’s a Singaporean thing.	1	1	0	1	0
SG-Reddit-48	Fine, cane, jail, exile, and execute this homo now!	1	1	1	1	1
SG-Reddit-49	No homo please, this is Singapore	1	1	1	1	1
SG-Reddit-50	Homo bad, family values good	1	1	1	1	1
SG-Reddit-51	The most important thing is to fish out the homo schoolteachers who are constantly seeking to anally penetrate little boys. Cane, jail, and cancel them!	1	1	1	1	1
SG-Reddit-52	Bruh you're not a pussy if you worry about slashings, I dont particularly feel like getting slashed today, or any other day tbh	0	1	0	0	0
SG-Reddit-53	can we also add that rsaf hougang knocking sound making person a terrorist too?	0	1	1	0	0
SG-Reddit-54	I sprayed the room, turned on air con...nothing works. in the end, i deal with these terrorist with counter terrorism tactics learnt in NS.......mosquito coil. It works.	0	0	0	1	0
SG-Reddit-55	No thanks. Maybe if got ISIS vtuber mascot ask to join then I consider.	0	1	0	0	0
SG-Reddit-56	Agreed. Muslims shouldn’t have to have butt-seks or get gay married.	1	1	1	1	1
SG-Reddit-57	I guess Samsung listened to their heart and said no homo	1	1	1	1	1
SG-Reddit-58	When u paste price tag with haram thoughts...	0	0	0	0	0
SG-Reddit-59	As a side note, disappointing that our local media names and hyperlinks terrorists like the Christchurch shooter.	0	0	0	0	1
SG-Reddit-60	This post would be more appropriate in r/Islam. Standard answer to this would be to break up. Bf gf relationship is haram, doubly so with a freethinker.	0	1	0	1	0
SG-Reddit-61	LMAO which idiot muslim actually think arabiki = arab? fking hell i thought only china chinese people have this level of thinking	1	1	1	1	1
SG-Reddit-62	Has he seen how many Malay guys buy 4D and drink beer? LoL Fuckin hypocrite	0	0	0	1	0
SG-Reddit-63	Most muslims won’t care lah. You want halal food? You want malay food? Lai, come makan.	0	0	0	0	0
SG-Reddit-64	Mock pork is haram but Mock Tail is ok. Because reasons.	0	1	0	0	0
SG-Reddit-65	lol. first time i hear of ah tiong self radicalisation	0	1	0	0	0
SG-Reddit-66	Assalamualaikum my name is Imran..here's how i donated $450 to a terrorist group with my passive income!	0	1	0	0	0
SG-Reddit-67	I knew it, of course Imran is a terrorist.	1	1	0	1	1
SG-Reddit-68	Just ask them to give up citizenship, take up PRC citizenship and move to China	0	1	0	0	1
SG-Reddit-69	Have to agreed. With such high volume of PRC tourists. Not infected? Probably people dead already there, and it is not reported and pass off as another typical bodycount.	0	1	0	0	1
SG-Reddit-70	Ok nvm I dowan support anymore this Winnie the Pooh cocksucker	0	0	0	0	0
SG-Reddit-71	With so many china chinese singapore new citizens now. We better show loyalty to motherland.	0	1	0	0	0
SG-Reddit-72	There we go comparing sg chinese to china chinese. It's like trying to fit apples with oranges, the culture also no fit lmao	0	0	1	0	0
SG-Reddit-73	I fucking hate prc	0	1	1	0	1
SG-Reddit-74	prc man forgot his bing qi ling	0	1	0	0	0
SG-Reddit-75	If you like a guy, is it considered gay?	0	0	0	0	0
SG-Reddit-76	That's why either conscript everyone or conscript no one. Ah gua have always had these problems in NS. Even 新兵小传 highlighted this decades ago. It's not nice for them, many killed themselves.	0	0	0	0	1
SBIC-0	if you make a fact filled book or book of lies about the clintons your gonna just end up another number on the clinton body count.	0	0	0	0	0
SBIC-1	Jason Donner‏: FBI Deputy Director Andrew McCabe has now been meeting with the House Intel Committee behind closed doors for more than seven hours.	0	0	0	0	0
SBIC-2	"""Almost called you to ask if you were okay... u were eating A LOT of food on your IG story yday. Are you going through things?"" Wow thx &#128528;&#128514;"	0	0	0	0	0
SBIC-3	"""Blanny loves it when I call her that... You can tell from the angrily blushes and explicit language. That's how you know, hmhmhmhm~"""	0	0	0	0	0
SBIC-4	"""Boys convince themselves they are a man by drinking lots of beer and having a vagina nearby to stick themselves into."" FUCKING NAILED IT"	1	1	1	1	0
SBIC-5	"""Don't worry, don't be afraid -- ever -- because... this is just a ride!"" _Bill Hicks"	0	0	0	0	0
SBIC-6	"""i've got these fucking barney rubbles in my mentions"""	0	0	0	0	0
SBIC-7	".@USER It showed gossip network users got news or headlines from those networks, that's not ""their news."""	0	0	0	0	0
SBIC-8	"@USER: Females think dating a pussy is cute now? URL" how does doing this stuff make him a pussy?	1	0	0	1	1
SBIC-9	"@USER: Have you ever been threatened with rape by a woman? #QuestionsForMen" Yes. Many times, but ONLY by feminist women.	1	1	1	1	1
SBIC-10	"@USER @USER +don't forget to grab your coupons to Big Belly Burger on your way out."""	0	0	0	0	0
SBIC-11	"@USER Pepsi is not alone, may be they are more direct but all of them turn politics into ""cool"" product then sell it for profit"	0	0	0	0	0
SBIC-12	"@USER @USER Bill O""Reilly did nothing wrong, says the Donald He probably just grabbed some pussy Like a president!"	0	0	0	1	1
SBIC-13	"@USER: bitches can't cook but know how to suck dick .." s/o to the ones that can do both!	1	1	1	1	0
SBIC-14	"@USER: Sad knowing that most hoes won't fuck with you bc you ain't got stacks." wait till friday	1	1	0	1	1
SBIC-15	"@USER No.. that's me laughing at your desperate attempts to ""explain-away"" people that don't believe/accept your cult's bullshit"	1	1	0	0	0
SBIC-16	"@USER I know it's easy to think names as first+last, but ""you can't create a lead without a last name"" ignores real world names."	0	0	0	0	0
SBIC-17	"@USER i deadass just hear hobi saying ""park jimin"" honestly this could be a play in our ears lmao"	0	0	0	0	0
SBIC-18	"As we loaded on the shuttle, our gate agent ran by our tarmac shuttle yelling ""where is the white plains plane parked?"" #lowconfidence"	0	0	0	0	0
SBIC-19	"Before we ""PRAY FOR SYRIA"" and their fake crisis, can we ""PRAY FOR CHICAGO"" and their real crisis of murdered children⁉️⁉️"	0	1	1	1	1
SBIC-20	"Bylsma on Justin Bailey: ""He did quite well up here, and the challenge is sustaining that. Saw dips and inconsistencies in his game."""	0	0	0	0	0
SBIC-21	"Edgy" means u get 2 complain about how persecuted you are for saying horrible things while u continue 2 face no consequences 4 saying them.	0	0	0	0	0
SBIC-22	"Fat acceptance" is absolutely degeneracy of the highest order, and during the Fourth Reich, there will be compulsory calisthenics.	1	1	1	1	1
SBIC-23	"From 1480 to 1913 European Queens waged far more wars that European Kings" [xpost: r/history]	0	0	0	0	0
SBIC-24	"Google Home to me this morning: ""Just remember, it is April 1st, so there are many people out to fool you today. Stay vigilant."" &#128514;&#128514;&#128514;&#128514;"	0	0	0	0	0
SBIC-25	"How can I help if she doesn't even try to explain what's ""the help"" she need & let me translate her needs from screenshot of WhatsApp convo?"	0	0	0	0	0
SBIC-26	"Is that an albino Mexican?" "No dad, he's Asian."	1	1	1	0	1
SBIC-27	"Libyan government to investigate slave auctions in which African migrants are sold to the highest bidder" How come they're selling them in Libya when they're giving them to Europe for free?	1	1	1	1	0
SBIC-28	"Madam, your son just called me ugly!" The mother apologizes shamefacedly, "I'm so sorry, I must have told him like a thousand times it is wrong to judge people just from how they look..."	0	0	0	0	0
SBIC-29	"Niggas don't lie, our ugly friend put up a pic we just gon write ""nigga u ugly"" under it"	1	1	1	0	1
SBIC-30	"One man's trash is another man's treasure" Wonderful saying, horrible way to find out that you were adopted.	0	0	0	1	0
SBIC-31	"Personality" I just want to get a bat and bludgeon the face of the next female that utters this word.	1	1	1	1	1
SBIC-32	"RT @USER: (Haters): Please name a rapper from Austin who has ""Valid"" numbers like these... can't? &#129300;Okay, shut the fuck up and…"	0	0	0	0	1
SBIC-33	"RT @USER: ""na boo you just be fucking with the wrong niggas"" - a wronger nigga"	0	0	0	0	0
SBIC-34	"RT @USER: Muslims in Germany chant""Adolf Hitler""&""death to Jews""as they Nazi salute. Ironically side fighting this hate in U.…"	1	1	1	1	1
SBIC-35	"RT @USER: .@USER to @USER ""Suck my dick. Suck my dick. Suck my dick you fucking prick"" #gayporn @USER…"	0	0	0	1	1
SBIC-36	"Red Pill" cuck gets used for money on a date, writes a field report on it lmfao	0	0	1	0	1
SBIC-37	"Snigger" -> "Laughrican American"	1	1	1	1	1
SBIC-38	"The ""White Helmets"" have done plenty of proven hoaxes in the past. Why would this event be any different?"	0	0	1	1	1
SBIC-39	"Why people think gay marriage is okay is beyond me. Sorry I don't want my future son seeing 2 fags walking down the street holding hands an	1	1	1	1	1
SBIC-40	"he is attractive but not my type" u hear this saying a lot from females in the show 'dating in the dark' ie: he is ugly but i don't want to look shallow because im a coward piece of shit	0	0	0	0	0
SBIC-41	"i can't stand these ""grown"" ass females &#129318;&#127997;‍♀️&#129318;&#127997;‍♀️ how you "" grown "" but childish as hell ?! &#128553;&#128514;&#129318;&#127997;‍♀️&#129318;&#127997;‍♀️"	1	0	1	0	1
SBIC-42	"i feel bad for intentionally mishearing this part in park bo gum's song (but i swear on me mum it sounded like ""chinko"" IM SORRY)"	0	1	1	0	0
SBIC-43	"if i wasnt in a work place id deck you" aye fucking right, I'd give you a tyson 4 combo nd end you with an uppercut. Shut the fuck up bitch	1	0	0	0	1
SBIC-44	"imagine having such a pathetic relationship with christ that'd you would ""consider"" paganism @USER"	0	1	0	0	1
SBIC-45	"just don't" = the sum total of your unconscious biases @USER I'm not sexist but I just dont like female singers haha	1	1	1	0	0
SBIC-46	"most ugly men are ugly on the inside too"	1	0	0	1	1
SBIC-47	#000000 this sub has only gone downhill since scrooge left, but i can't blame him. nigger	1	1	1	0	1
SBIC-48	#Ascendant / #MediumCoeli for Budapest, H for now (16h28m02s UT): 06°51'22.7'' #Libra (AC) / 08°30'57.6'' #Cancer (MC)	0	0	0	0	0
SBIC-49	#Hyères #footjob throat #sexo #uniforms #planq #incall #chatroom blowjob #kikhorny #dirty URL	0	0	0	0	0
SBIC-50	#YesAllWomen because my mother hoped I would inherit a better world than this	0	0	0	0	0
SBIC-51	#cabinetreshuffle fricking hell Melusi Gigaba for finance minister???????? @USER @USER I'm shell shocked	0	0	0	0	0
SBIC-52	#faggots are MERELY a #scientific indicator that SOMETHING IS WRONG> Do not celebrate as "unique indiviuals" for they are #cancer>	1	1	1	1	1
SBIC-53	#followfriday time! You guys are so so awesome!! Thanks for the support &#128522; #GamersUnite @USER @USER	0	0	0	0	0
SBIC-54	&#8220;@USER: done w. All these fuck niggas &#128554;&#128514; snip snip hoe &#9996;&#65039;&#9986;&#65039;&#8221; stfu	1	1	1	1	1
SBIC-55	&#8220;@USER: Throwing lamps at bitches who need to lighten up.&#8221; True dat	1	0	0	0	1
SBIC-56	&#8220;@USER: If Jennifer Hudson can lose weight anybody can you fat ass hoes!!!&#8221;&#128514;&#128514;&#128514;&#128514;	1	0	0	1	1
SBIC-57	&#8220;@USER: I'm 2 much for these niggas and 3 much for these hoes &#128129;&#8221;	1	1	1	0	1
SBIC-58	&#8220;@USER: @USER would love the Parkside sport girls, dressed like Kobe all day everyday!&#8221; Let me see 1 of them hoes	0	0	1	1	0
SBIC-59	&#8220;@USER: That one friend who you greet with an insult.&#8221; @USER @USER niggers	1	1	1	1	0
SBIC-60	&#8220;@USER: When hoes feel like their photo didnt get enough favorites URL;	0	1	0	0	0
SBIC-61	&#8220;@USER: If you got netflix watch fresh that hoe live&#8221; from now on my name is Chuck E I'm not chuckie no more &#128514;&#128514;&#128514;	0	0	0	0	0
SBIC-62	>tfw even if you woke up as Chad and you wouldn't feel any different because years of psychological damage at the hands of female human organisms has permanently made you the way you are mentally	1	1	1	0	0
SBIC-63	<--- number of femoids who would rather die than spend more than 5 seconds with an incel	1	1	1	1	1
SBIC-64	'As long as we never make another mistake the left will let us speak' Good luck with that, altlite fags.	1	1	1	1	0
SBIC-65	'Build the wall deport em all (not just illegals)'	1	1	1	1	1
SBIC-66	(If I owe you a reply please forgive me. I can't find them! It will take me a bit of time to go through my mentions.)	0	0	0	0	0
SBIC-67	(In America) Men get circumcised but women don't Maybe if we started cutting off their clits they'd be less likely to whore away their youth	1	1	1	1	1
SBIC-68	(Stolen) A black woman calls her 5 kids Tyrone. How can she tell them apart? By their last names	1	1	1	1	1
SBIC-69	*Does backflip* THISSSSSSSS!!! RT @USER: You niggas switch up your opinions like faggots	1	1	1	1	0
SBIC-70	*Goes to store* A box of condoms, please. That’ll be 3,99. Do you want a bag with it? Nah I’m OK. She’s actually quite pretty.	0	0	0	0	0
SBIC-71	*Has upset stomach* *Smokes j of Blue Dream* *Doesn't have upset stomach* Funny how that works.	0	0	0	0	0
SBIC-72	*No jews were harmed in the making of the holocaust.	1	1	1	1	1
SBIC-73	*gasps* You've NEVER had taiyaki* before? You're not really Japanese!	0	0	0	0	0
SBIC-74	*jumps up and down because I cannot wait to get to it and for @USER to destroy me emotionally*	0	0	0	0	0
SBIC-75	*most boys @USER I'm not sexist but all the internet does is show that most girls don't know how to form their own opinions.	1	1	1	1	1
SBIC-76	.@USER Realized then that selfish hypocrisy is the crux of modern feminism, not equality.	1	1	0	0	0
SBIC-77	.@USER really does talk like a buck nigger	1	1	1	1	1
SBIC-78	.@USER there will not be comment section so people comment i want to see reviews so i feel people are watching liking chandrakanta or not	0	0	0	0	0
SBIC-79	12 Computer Technicians Share The Weirdest Thing Theyve Found On A Customers Computer. URL	0	0	0	0	0
SBIC-80	135 Billion dollars a year due to Illegal Aliens .....NO MORE IMMIGRATION.....PERIOD....WE ARE FULL !	0	1	1	1	1
SBIC-81	2 condoms walk by a gay bar The other one looks at the other and asks "Hey, you wanna go get shitfaced?"	1	1	0	1	1
SBIC-82	2018 Democrat Strategy: Lie about Conservative Candidates Dredge up paid examples of lies Flood advertising with these lies and liars Bring unqualified voters to the polls by the busload Program voting machines to register "Democrat" at least 1.5:1 ratio Destroy votes immediately after election	0	1	1	0	0
SBIC-83	28. We see all the budding possibilities and are excited to be accepted by such a wonderful and perfect person. #YingAndYang	0	0	0	0	0
SBIC-84	4) safety gloves. It's time we start calling out the hypocrisy and end our coddling of religion. No more tax breaks for churches. No more	0	0	0	0	1
SBIC-85	4chan will find out the truth about the shooter before our government does.	0	0	0	0	0
SBIC-86	9/11 jokes always seem good in the beginning But then they come crashing down	0	0	0	0	1
SBIC-87	9/11 was a very sad day... I lost 500$ betting on which building would fall down first.	0	0	0	0	0
SBIC-88	9/11 was an inside job I mean why else would you only put one tower to replace two, there's no way that Trump could hit two targets in one go	0	0	0	0	0
SBIC-89	:D @USER Dudes who go to culinary school: #why #findawife #notsexist :)	0	0	0	0	1
SBIC-90	<url> [ removed ]	0	0	0	0	0
SBIC-91	> Because in my family my mom would have supported me getting a new dress and would have made my sister pay for it (as she should) Love this idea.	0	0	0	0	0
SBIC-92	@USER too bad hes a faggot	1	1	1	1	0
SBIC-93	@USER yeah that niggah played good, lowkey i wanted brazil to win	0	1	1	0	1
SBIC-94	@USER @USER No he didn't. He said that at one rally. So at no point do we blame the people who acted out.	0	0	0	0	0
SBIC-95	@USER Yes because the person we voted for is keeping his promises, in spite of the lefts resistance! # MAGA. today and 2020	0	0	0	0	0
SBIC-96	@USER I don't really do twitter JA 2 emotio wen the countdown of letters goes from 1left to a negative &then… URL	0	0	0	0	0
SBIC-97	@USER Dat damn dog eats betta den most colored folk do.	1	1	1	1	1
SBIC-98	@USER @USER I'm afraid no chance 4 US 2 get a really independent potus.Swamp drains anyone.Doubt… URL	0	0	0	0	0
SBIC-99	@USER Shame of you! Self-hating kike. We Jews are G-d's chosen people.	1	1	1	1	1
SBIC-100	@USER hii fag. :)	1	1	1	1	0
SBIC-101	@USER I eat dat chicken out your love box baby. Lovin a white woman while eatin chicken. A colored mans dream	0	0	1	0	0
SBIC-102	@USER faggot	1	1	1	1	1
SBIC-103	@USER bet hoe	0	0	0	0	0
SBIC-104	@USER And once he called me an ungrateful bitch and retarded nigga in an argument. It's how we argued. Now… URL	1	1	1	1	0
SBIC-105	@USER gay fags	1	1	1	1	1
SBIC-106	@USER @USER Well, NI seems stuck. RoI doesn't want it. Westminster views it as a burden. It'll have to help itself, I think.	0	0	0	0	0
SBIC-107	@USER You don't have any kids?! What are you, one of them queers!?	1	1	1	1	0
SBIC-108	@USER "bitches talk shit, you got the right to swerve" god damnit you are da shittt	0	0	0	0	1
SBIC-109	@USER What else do you expect from that nigger lover?	1	1	1	1	1
SBIC-110	@USER them hoes ain't thick at all u clowning	0	1	0	0	0
SBIC-111	@USER why did Nunes recuse himself? Why does your party refuse to stand up and fight. I'm disappointed.	0	0	0	0	0
SBIC-112	@USER niqqa that's every white person just because some might seem down to earth don't mean there not gonna use nigger against us	1	1	1	0	1
SBIC-113	@USER CH3BURASHKA sure gets to be a nit-picky Russian monkey/bear thing sometimes, doesn't he?	1	1	1	1	1
SBIC-114	@USER Omg shes so fucking THIRSTY for me & i find it so unattractive when people are that dehydrated	0	0	0	0	0
SBIC-115	A "random scientist" that keeps blogging about me. A sexist asswipe that told me to not bother with my projects coz he did it @USER	0	1	0	0	1
SBIC-116	A Black kid complemented my T-shirt He said: Nice shirt faggot... I said yeah, it’s 100% cotton. Tell your grandparents I said thanks	1	1	1	1	1
SBIC-117	A Cop Told A Suspect To Put His Hands Up, And Then He Shot Him. Do You Know Why? Because He Was Black	0	1	1	1	1
SBIC-118	A Jew walks in to a bar And then the metal door closes behind him	1	1	1	1	1
SBIC-119	A Jewish boy asks his father for $50. The father replies, "$40, what do you need $30 for?"	1	0	0	0	0
SBIC-120	A Jewish toddler drowned recently. He threw a penny into a fountain, hoping it gave him a wish. His parents then chucked him angrily into the water to get it back.	1	1	1	1	0
SBIC-121	A Madden player was fatally shot during a touchdown... Trueboy really was in the 'End Zone'	0	0	0	0	0
SBIC-122	A Mexican and an American jump off a skyscraper at the same time. Who hits the ground first? The American because the Mexican has to clean the windows on the way down	1	1	1	1	1
SBIC-123	A Muslim man said “Allah Akbar” But I thought he was sneezing so I said “god bless you” and I was blown away by his reaction.	1	1	1	0	0
SBIC-124	A Nigguh spitting dat crack to your bitch	0	1	1	1	1
SBIC-125	A bf and gf&#128107; are suppose to laugh&#128514; at these hoes&#128111; together&#128145;. A guy should never have these hoes&#128111; laughing&#128514; at his girl&#128134;	1	0	0	0	0
SBIC-126	A black guy and Mexican were in a car, Who is driving? The Cop	1	1	1	1	1
SBIC-127	A black guy finds a genie in a bottle Any three wishes he had would be granted, the genie informed him. "I wanna be rich," said the black guy. The back yard filled up with chests of gold coins and jewels in the blink of an eye. "I'm no fool," said the black guy. "I wanna be white." And there he stood, white, blonde-haired and blue-eyed. "Last but not least, I never want to work another day in my …	1	1	1	1	1
SBIC-128	A black guy went to give a white guy a high five And then the black guy said "why did you leave me hanging?"	0	1	1	1	1
SBIC-129	A black man and a Mexican jump off the roof at the same time, who hits the ground first? Who cares?	1	1	1	1	1
SBIC-130	A black man and a jew jump off a building. Who lands first No one cares	1	1	1	1	1
SBIC-131	A black man and a white women go to her apartment... ...when they get their she grabs his crotch and says "Show me what they say about black men is true." So he stabs her and takes her purse.	1	1	1	1	1
SBIC-132	A black man gets shot 12 times and stabbed 34 times by a white man. "These black people are now possessing people in order to commit suicide. Worst case of suicide I've seen" #####- Local County Sheriff	1	1	1	1	1
SBIC-133	A black man walked into a bar.... Sorry, I meant 3/5ths of a man walked into a bar	1	1	1	1	1
SBIC-134	A black man walks into a bar with a parrot on his shoulder. Bar tender goes he man that's neat where did you get that? The parrot says Africa there all over the fucking place!	1	1	1	1	1
SBIC-135	A cripple walks into a bar. Just kidding, no he doesn't.	0	1	1	0	1
SBIC-136	A female on r/foreveralone turns out to be an actual creep and thought about stalking Chad.	0	0	0	0	0
SBIC-137	A gay guy, A black guy, and A Jew get hit by a bus They all appear in front of the gates of heaven. The Angel says. "Welcome to Heaven!" The three guys beg him for a second chance. The angel says,"I can only do it if you promised to give up what you love doing the most." The three men immediately agreed to do that. Suddenly, they're on the street and the bus is passing by. They cautiously cross t…	1	1	1	0	1
SBIC-138	A guy wanted to be burned So someone called him a Jew.	1	1	1	1	1
SBIC-139	A guy with parkinsons went to the bathroom to pee He came.	1	1	1	1	1
SBIC-140	A jew with a boner walks into a wall what does he break? his nose	1	1	1	1	1
SBIC-141	A long time ago, scientists started to combine dog DNA along with human DNA. The outcome turned out to be Mexican girls.	1	1	1	1	1
SBIC-142	A male fellow philosophy student tells me:: Don't read <insert old, dead, iconic male philosopher here>, it wasn't written for you. (It wasn't written for women.) He also says, after a girl gives her interpretation of a reading:: This is what happens when you let women study philosophy.	1	1	1	1	1
SBIC-143	A man of opposite color of white is offensive I just want to state my hate for them /s might be needed	1	1	1	1	1
SBIC-144	A naked woman bursts into a police station covered with bruises and is screaming "GRAPE! GRAPE! GRAPE!". The duty officer replied "Don't you mean RAPE?" The woman said "No, there a bunch of them!"	0	0	0	0	0
SBIC-145	A pedophile, a rapist and a priest walk into a bar And thats just the 1st guy	1	1	1	0	0
SBIC-146	A priest & a rabbi walk through a forest where they find a boy strapped to a tree & unconscious. The priest says, "Should we screw him?" To which the rabbi replies, "Out of what?"	1	1	1	1	0
SBIC-147	A priest told me that he was secretly santa,but I could not tell anyone Every time I came back from church my butthole hurts	1	0	1	0	0
SBIC-148	A red bull a day keeps the niggers away	1	1	1	1	1
SBIC-149	A rich black man, a educated black man and a poor black man was walking down the street when they saw a drumstick on the ground, who picked it up? The poor black man as the other 2 don't exist	1	1	1	1	1
SBIC-150	A silver lining of growing obesity rates and trashy tattooing trends among women Far fewer females to worry about passing when I go out and pining over.	1	0	1	1	1
SBIC-151	A single book of matches gonna burn what's standing in the way. Roaring down the mountain, they're calling on the fire brigade...	0	0	0	0	0
SBIC-152	A special #DIHWorkshop tip: screw holes can be hidden with wood filler to make painting smoother. Try it out! #حياتك53	0	0	0	0	0
SBIC-153	A subreddit meant for guys who get cucked to come together and talk about it If you go to the sub r/deadbedrooms its literally guys who are in relationships were they get cucked because the women only want them for their money and support.	0	0	1	0	0
SBIC-154	A white male toddler needs to have its head smashed by a hammer because its a rapist But every nigger and a spic can rape a newborn in the ass and be seen as a deity for it	1	1	1	1	1
SBIC-155	A white man and a black man play hide and seek at night. Who has the advantage? The white man, as the cops are on his side.	1	1	1	1	0
SBIC-156	A wife is killed after a car drives through her living room and kills her. Who's fault is it? The wife's because she should've been in the kitchen	1	1	1	1	1
SBIC-157	Aan indian was taking a dump and died. Strange, isn't it?? He didn't pay attention to the train heading towards him...	1	1	1	1	1
SBIC-158	Abortion It really brings out the kid in you.	0	0	0	0	0
SBIC-159	According to evolution, all human beings came from apes Except for Indians, they came from rapes.	1	1	1	1	1
SBIC-160	Africa is really boring during Halloween Everyone's a skeleton	1	1	1	1	1
SBIC-161	African Americans scare me. They've taken over the sub to take back the Dark in Dark Jokes.	1	1	1	1	1
SBIC-162	Africanized bees are more aggressive than regular bees. Just like Africanized humans	1	1	1	1	1
SBIC-163	Africans actually have more of some things. Like infant mortality.	1	1	1	1	1
SBIC-164	After going blind a man stabbed himself to death. Know Why? He could no longer see the point	0	0	0	0	0
SBIC-165	After watching the clip on "Mansplaining" I would like to introduce the term "Vaginapology" I believe this is self-explanatory.	0	1	1	0	0
SBIC-166	After witnessing the shit show that is tRUmp and the nihilism of the @USER & @USER, maybe, just maybe folks will show up & #VOTE!	0	0	0	0	0
SBIC-167	Agreed, The Blacks and Hispanics should have their own school only for them and have worse education than the children whites like that might not compete with our children whites .	1	1	1	1	1
SBIC-168	Al Jazeera are making their own version of the Jeremy Kyle show They'll discuss scandals such as monogamy and consensual adult relationships	0	1	0	0	0
SBIC-169	All I found out yesterday was that I'm the prettiest ugly Nigga out hurrrrrr	0	0	0	0	0
SBIC-170	All I want for Christmas is an absolute elimination of Islam in the western world.	1	1	1	1	1
SBIC-171	All I want is to stop hurting... All I want is to make my pain go away, but it never fucking leaves, ever...at best I just start feeling nothing.	0	0	0	0	0
SBIC-172	All girls have rape fantasies. At least all the girls in the nursery I teach at.	0	1	1	1	1
SBIC-173	All of these school shootings in the news are really effecting me, I never thought I would let fame go to my head	0	0	0	0	0
SBIC-174	All the jews I have ever known will do anything for money , and all I can say is there are no good jews	1	1	1	1	1
SBIC-175	All you muzzy lovers need to do one thing. Tell muzzies in the mideast to leave Israel alone. Don't start no shit won't be no shit. #Israel	1	1	1	1	1
SBIC-176	Already pre-ordered Destiny 2 Limited Edition bundle and its only had one teaser trailer. Can you feel my excitement.	0	0	0	0	0
SBIC-177	Also, I can't imagine anything more counterproductive than getting into fights with shit-tier niggers and other diversity when those aren't the people who have socially engineered the destruction of your homeland.	1	1	1	1	1
SBIC-178	Although we have slight variances in our position here I want to thank all the posters who have kept this thread civil .	0	0	0	0	0
SBIC-179	Always remember, it was normies that enacted the Holocaust, acted in the Slave Trade, and committed every atrocity in history Normies are evil	0	1	1	1	1
SBIC-180	Amazing how #labor & #liberals point the finger at the independents for their failures for not getting on with the job of governing #pmlive	0	0	1	0	0
SBIC-181	Amusing to watch the #LyingLiarsLie about incompetence while being so unaware at how incompetent they themselves are #maddow #resist	0	0	0	0	0
SBIC-182	An Asian woman just gave me a handjob while fingering my ass Which isnt what i meant when i asked her to give me a 'Hand Roll and Pork Intestines That's the problem with having the Chinese Massage place right next to the Chinese takeout place	1	1	1	1	1
SBIC-183	And mi hate a bum bitch Mi really really hate bum niggas	1	1	1	1	1
SBIC-184	And then there 's Asiacourt , the once beautiful , safe , WHITE , area of Scarborough ... ( and the last i checked ) was a garbage infested Chinease outpost .	1	1	1	1	1
SBIC-185	And this same teacher will call the Germans evil because they taught their school children the same thing about the jews .	0	1	1	1	0
SBIC-186	Anerican Dream We were talking about the american dream in class and the teacher said to a german boy if he had a german dream. He said "We did but no-one liked it."	0	0	0	0	0
SBIC-187	Angela Spain was murdered in her home by a drifter negro .	1	1	1	1	1
SBIC-188	Another good match, would have meant more if it was her first title match win , but still good finish with the elbow drop #Wrestlemania	0	0	0	0	0
SBIC-189	Are there any sources that state that it was Trotsky who reiceived the money and was responsible for destruction of Black Hundreds , as opposed to Lenin or another Bolshevik leader ?	0	0	0	0	1
SBIC-190	Are there really that many gay people?!	0	1	0	0	0
SBIC-191	Are you Sandy Hook? 'Cause I wanna shoot some kids inside you.	0	0	0	0	0
SBIC-192	Are you guys tired of being lumped in with rich old white men in politics and in business, while you toil away and live from paycheck to paycheck?	0	0	1	1	1
SBIC-193	Are you white but wanna be black? Just follow the Jews footsteps.	1	1	1	1	1
SBIC-194	Arseniy Yatsenyuk approved as Ukraine 's new prime minister Arseniy Yatsenyuk , Ukraine 's new prime minister Published February 27 , 2014 / URL Source : Arseniy Yatsenyuk approved as Ukraine 's new prime minister | Fox News	0	0	0	0	0
SBIC-195	As a poor Southern Man here in Kentucky I wish I could go to the MAGA Movement Rally's and Demonstrations but when you live by a budget and trying to make every unemployment check you get stretch as wide as Rosie O'Donnell's Ass it's hard to do those things	0	0	0	1	1
SBIC-196	Asian girls sees a chad... URL suicide fuel right here.. chad privilege much?	1	1	1	1	0
SBIC-197	Asian women hate their race so much they will literally date white supremacists	1	1	1	1	1
SBIC-198	Asking north Korea not to make nuclear weapons is a bit like asking an Audi driver not to drive too close to the car in front.	0	1	0	1	0
SBIC-199	At this point I will assume the media is lying about everything other than a Negro being arrested for his murder .	1	1	1	1	1
SBIC-200	Awwww. What would you call The Flintstones if they were black???????...….. niggars.	1	1	1	1	1
SBIC-201	B.S., there would not be a race war because of Whites going out and shooting up non-White neighborhoods ; it is already open season on White Americans and White Europeans and White Australians and White Canadians .	1	1	1	1	1
SBIC-202	BREAKING NEWS: Shooting at a New Mexico high school leaves three students dead and 15 injured... LET US ALL GUESS!	0	1	0	0	1
SBIC-203	BUT LIKE ME I CANT JUST GO WORK AT MCDONALD'S NOW...Like i gotta do shit to bring HARMONY which is OF LOVE LOVE IS GOD AND IN IT PUREST FORM	0	0	0	0	0
SBIC-204	Baking was your major in college? Our Führer has the perfect job for you.	0	1	1	0	1
SBIC-205	Beautiful, I 'm so glad it went well .	0	0	0	0	0
SBIC-206	Being colorblind has given You the Degenerate Fucked Up Country you've got Now.....If You like It.....Keep Doing what you're Doing !......Azzmador	1	1	1	1	1
SBIC-207	Being tall is a good advantage for being taller It's also good if you wanna get shot easily.	0	0	0	0	0
SBIC-208	Bhopal Gas Tragedy killed 15000 Indians Yeah while you are here, please send bob	0	1	0	0	1
SBIC-209	Black ' females ' fighting with black police in Harlem after the officers try to ticket them for skipping their fares .	0	1	1	0	0
SBIC-210	Black People are functional members of society. Lock this post if you agree	0	0	0	0	1
SBIC-211	Black Student:: Yeah man us Black people don't do too well in water. White student:: Yeah, yall took advantage of that free boat ride huh? An exchange my friend who attends Lake Forest College overheard.	1	1	1	1	1
SBIC-212	Black men always lock their own kids out of their life. Lock this thread if you agree.	1	1	1	1	0
SBIC-213	Black people are like mitochondria They're the powerhouse of the cell	1	1	0	1	1
SBIC-214	Black people are nothing like monkeys because at least monkeys are well behaved	1	1	1	1	1
SBIC-215	Black people arent like sperm Black people can't swim and sperm swims so they are unsuccessful	1	1	1	1	1
SBIC-216	Black people deserve the same rights and the civil rights act wasn’t a mistake. Lock if u disagree.	0	0	0	0	0
SBIC-217	Blacks are a lot like apples After all, it's just natural for them to hang from trees	1	1	1	1	1
SBIC-218	Blacks can shoot , funny thing is they only seem to be able to hit the little innocent law abiding child , walking home from church to help take of their sick mother .	1	1	1	1	1
SBIC-219	Blue Bell ice cream has one showing five kids one black playing in the fields and barn .	0	0	0	0	1
SBIC-220	Broke: Worried that a 3rd world immigrant is going to murder me or someone in my family Woke: Worried that a jury of 3rd world immigrants will let them get away with it #KateSteinle	1	1	1	1	1
SBIC-221	Build a wall throw the illegals over it and put it on PPV where all the money goes to the troops.	1	1	1	1	1
SBIC-222	But you are too strong to be raped.	0	1	0	1	0
SBIC-223	But you're not REALLY disabled. You look so pretty!	0	1	1	1	0
SBIC-224	Cagondie bailando fucking shuffle en nava esto es la focking polla	0	0	0	0	1
SBIC-225	Can someone explain unwelcome and involuntary when it comes to verbal sexual harassment?	0	0	0	0	0
SBIC-226	Check out CBSN On Assignment on CBS at 9pm they are gonna tell moslem kids its not right to cut peoples heads off... could be funny	1	1	1	1	1
SBIC-227	Chingle changle goes the jew Because of the pennies in his pocket that he stole from you	1	1	1	1	0
SBIC-228	Cleary has been there two days. Two fucking days. But yeah it him kicking players out &#128580; Give me a fucking spell.	0	0	0	0	0
SBIC-229	Coffee just dinged, so I'm going to finish this story quickly.	0	0	0	0	0
SBIC-230	Colombians hate Americans, so let the haters die in the mud. Every Colombian child killed in the mudslides, one less future American hater.	1	1	1	1	1
SBIC-231	Compare your ideal woman to a drink, and then to food Joe says red wine and steak. Bob says coffee and blue berries. Joe asks how that is an ideal woman, Bob says “black and blue”	1	1	1	0	1
SBIC-232	Cool, finally got it working just in time to hear someone call in and let the host know that thanks to Stormfront , the show is being listened to all over the world .	0	0	0	0	0
SBIC-233	Countdown until GamerGate screencaps and starts talking about how fat I am. <3	0	0	0	0	0
SBIC-234	Crosspost: /r/Atheism submission notes how large percentages of Muslims support killing women for adultery, while omitting fact that the same percentage supports killing men.	0	0	1	1	0
SBIC-235	Current GOP demonstrating depth of their Christian values. @USER @USER @USER #HaveAHeart URL	0	0	0	0	0
SBIC-236	Currently sitting down wishing a bitch would.&#128133;	0	0	1	0	1
SBIC-237	Dating after 30 like trying to find a parking space... The good ones are taken and the rest are handicapped	0	1	1	1	0
SBIC-238	Dear Utah Polynesians: Again, stop acting black and speaking ghetto. Speak FOB, you ain't no ghetto niggaz.	1	1	1	1	1
SBIC-239	Dear republicucks: yes we've noticed how quick you were to throw judge Moore under the bus we also know it's not a coincidence you and the left oppose the same people	1	1	0	0	1
SBIC-240	Dicks are basically ar-15s Only disabled kids whip em out in class	1	1	1	1	0
SBIC-241	Did they try turning Stephen Hawking off and on again?	0	1	0	0	0
SBIC-242	Did you hear about the Irish exorcism? They had to bring in the devil to get the priest out of the child.	1	1	1	1	1
SBIC-243	Did you hear about the two car pile up in Mexico? 200 Mexicans died.	1	1	1	0	0
SBIC-244	Did you know it's possible for a woman to have an orgasm when she's being raped? I mean come on, is there anything they won't ruin?	1	1	1	1	1
SBIC-245	Did you know that Germany came up with sparkling water Who else would think of adding gas.	1	1	1	1	1
SBIC-246	Did you know that Ray was not the inventor of the X-Rays? He was his little brother.	0	0	0	0	0
SBIC-247	Did you know there's an equation to calculate the rate of Jews who left concentration camps? Chimney length vs. wind speed.	1	1	1	1	1
SBIC-248	Disgusting whore has sex with her gay friend and gets HIV.	1	1	1	1	1
SBIC-249	Dj Khaled is retarded	0	1	1	0	1
SBIC-250	Do schools have speed bumps? Because I think I hit a couple eariler today but I never recall seeing any at that school before.	0	0	0	0	0
SBIC-251	Do tell feminist hypocrites who organized abuse report fraud to REPEATEDLY ban @USER of #WomenAgainstFeminism how you #LetWomenSpeak.	1	1	0	0	0
SBIC-252	Do you ever ask yourself why you have a screen name that 's reminiscent of the sound a butthole makes after too many beans ? .	0	0	0	0	0
SBIC-253	Do you know how copper wire was invented? Two Jews fighting over a penny	1	1	1	1	1
SBIC-254	Do you know what’s the worst part of a blow job ? It’s when you realize the 72 virgins were a lie.	0	1	1	0	1
SBIC-255	Do you want to know how a depressed person can beat depression quick? Just give them a chair and a rope, the depression will be gone in a matter of minutes!	1	1	0	1	1
SBIC-256	Doesn't make it to formal one time out of my four years of college and everyone and their grandmas still remember &#128579;	0	0	0	0	0
SBIC-257	Don't forget to catch us tomorrow for the last workplace challenge on @USER with @USER	0	0	0	0	0
SBIC-258	Don't mind how we strong racist Republican people enjoy our freedom of playing out or acting out as free as we want and do whatever we want as we vote for you to do the same but remember we all ready if you like to abuse our friendliness for such freedom #GodBlessAmerica	0	1	0	0	1
SBIC-259	Don't subtweet me you conniving stupid idiotic bitch &#128580;	0	0	0	0	0
SBIC-260	Don't worry about Mr. ________. He's just extremely Jewish.	1	1	1	0	1
SBIC-261	Don’t bully people with obesity! I’m being serious guys, they already have enough on their pl8!	0	1	1	1	1
SBIC-262	Education system is messed up for the same reason everything else is messed up - Jews , non-whites and liberal women run and ruin everything .	1	1	1	1	1
SBIC-263	Ever notice the way the mechanisations of the state , always side with their anti-fascist NWO goffers ?	0	0	1	0	0
SBIC-264	Ever since I've become a cop, I've had to deal with endless cases of rape victims. I mean, these women trust me too much with my uniform on.	1	0	1	0	0
SBIC-265	Everyone in this thread is sick for making dark jokes! I just got my 7 year old judaism converted autistic paraplegic daughter pregnant insted of my dead one cause I was busy laughing while having a threesome.	1	1	0	1	1
SBIC-266	Exposed man charged with risk of injury Found with child in car Just another day in da hood ....	0	0	0	0	0
SBIC-267	F-K-G Leftists want to destroy every single institution that makes America the country that she is.	1	1	1	1	0
SBIC-268	FAB NEW 925 Silver Adjustable Brown Cord Bracelet with 14 Karat Gold Plated CZ Circle $18 @USER URL	0	0	0	0	0
SBIC-269	FAST F - FACE: Has it fallen on one side? A - ARMS: Can they raise them? S - SPEECH: Is it slurred? T - TIME... to get her knickers down. The rohypnol has kicked in.	0	0	1	0	1
SBIC-270	FOR ALL THE IDIOTS THAT BELIEVE THE ILLEGAL IMMIGRATION PROBLEM STARTED A FEW DECADES AGO......I BELIEVE IT WAS 1965.....NO MORE IMMIGRATION PERIOD......BUILD YOUR OWN COUNRTIES MOTHERFUCKERS	1	1	1	1	1
SBIC-271	Fat fucking funky nasty ass hoes	0	0	1	1	1
SBIC-272	Fat girls, landwhales, ugly girls So on online dating why do they think they are entitled to chad?	1	1	1	1	1
SBIC-273	Fat hoes on Twitter calling themselves Barbies, bitch you ain't no damn Barbie you a damn care bear.	1	0	1	1	0
SBIC-274	Father's wise words on my 23rd Birthday "After shagging a dozen birds you'll probably want to settle down" - my Father.	0	0	0	0	1
SBIC-275	Female loneliness \>ignores 90% of men \>only fucks Chads \>gets pumped and dumped or used as a cum dumpster when Chad's main bitch is being a bitch \>"I'm lonely girls can be incel too :("	1	1	1	1	1
SBIC-276	Feminism is toxic for men Discuss and critically evaluate in less than 2000 words.	0	0	0	0	0
SBIC-277	Feminism- bunch of adult women deciding that it's ok to permanently disfigure a baby boy's penis.	1	1	1	1	1
SBIC-278	Feminist compares Cologne mass rape to white men raping her with their eyes • /r/european	0	1	1	1	0
SBIC-279	Fighting fire with fire is not the fucking answer!!! @USER #usairstrike #helpsyria #stopfightingfirewithfire #Airstrikes	0	0	0	0	0
SBIC-280	Finally something positive I found of the Ethiopians HIV	1	1	1	1	1
SBIC-281	Financial Fatherhood Are men legally able to waive financial responsibility in Texas if they were part of an unplanned/unwanted pregnancy?	0	0	0	0	0
SBIC-282	Fly Q-How do you kill 100 Flys at once? A-Hit an Ethiopian in the face with a frying pan.	1	1	1	1	1
SBIC-283	Found a Transponder Snail! Shots of those Spooky guys at Thriller Bark! URL #TreCru URL	0	0	0	0	0
SBIC-284	Gay Muslims are the horniest. They blow the entire neighborhood.	1	1	1	1	1
SBIC-285	Genesis 16:12 "He will be a wild donkey of a man; his hand will be against everyone and everyone's hand against him, and he will live in hostility toward all his brothers" Ishmael was Abraham's firstborn, from his slave Hagar Ishmael is recognized by Muslims as being the forefather of Muhammad	0	0	0	0	0
SBIC-286	Girls will literally try to talk to you about how bad your ex is, then literally be blowing their phone up behind your back. Smh &#128514;	0	0	0	0	1
SBIC-287	Gladio's tattoo must've cost so much fucking money	0	0	0	0	0
SBIC-288	God in Heaven Hitler on Earth Jews in the atmosphere	1	1	1	1	0
SBIC-289	God was a big fan of wrestling Until his son got pinned.	0	0	0	0	0
SBIC-290	Going braless in a jumpsuit seemed like a good idea, until I was currently sat naked in a public restroom x	0	0	0	0	0
SBIC-291	Going to buy some timbs, Air Force 1s, other Nike shoes and idk. I feel the need to expand. OK goodnight for real now	0	0	0	0	0
SBIC-292	Good news! AIDS is no longer the leading cause of death in Africa! Seems like they're finally starving before a mosquito can bite them.	1	1	1	1	1
SBIC-293	Got banned from r/Aspergers for throwing red pills at them AHAHAHAHAHAHAHAHA GET FUCKED, SPERGS	1	1	1	0	1
SBIC-294	Government won't ley Key residents back til they loot all the guns....	0	1	0	0	1
SBIC-295	Guys ( and gals ) , just wanted to say : there are few things more entertaining than watching you do another arrogant negro poster .	1	1	1	1	1
SBIC-296	Guys I just got my chromosome test back Above average	0	0	0	0	1
SBIC-297	HI im looken to recrute and i dont know anything bout how to so I was wondering if anyboby can help me out .	0	0	0	0	0
SBIC-298	HONESTY HOUR: like this post and I'll dm you a name and you gotta quote the tweet and be honest about how you feel about them &#128064;&#128539;	0	0	0	0	0
SBIC-299	Hack by ur dope ass girlfriend. I love you more than anything, I'm so lucky to call you mine handsome.&#128536;#mymcmeveryday	0	0	0	0	0
SBIC-300	Hahaha, you're so funny! You're not asexual! There's no such thing! Humans are MADE for sex! You just haven't had GOOD sex yet! Someday you'll meet the right guy and you'll want to screw his brains out, and then you'll remember how insane you were to ever say you're asexual!	1	0	1	1	0
SBIC-301	Happy birthday, little Sofia, we love you very much and wish the best ever &#128557;❣️&#128149; #HappyBirthdaySofi #WishesForSofi URL	0	0	0	0	0
SBIC-302	Has anyone created a new sub for the refugees of this sub yet?	0	0	0	1	0
SBIC-303	Has to be a parody account. @USER I'm not sexist, but women just shouldn't be sports announcers.	1	1	1	1	1
SBIC-304	Have you ever tried Ethiopian cuisine? Nether have they	0	1	1	0	1
SBIC-305	Have you guys seen the new study from BOFA?	0	0	0	0	0
SBIC-306	Having a criminal record is more attractive to women than having a PhD A violent alpha male is the ultimate sexual desire for women.	1	0	0	1	0
SBIC-307	Having sex with german girls is weird They keep screaming their age for some reason.	1	1	0	1	0
SBIC-308	He's a retarded feral negro ( yes , feral humans who cannot talk occasionally pop up , having been abandoned as children. ) .	1	1	1	1	1
SBIC-309	Heard this from a 12 year old: 'Whats the difference between black people and apples?' I like apples	1	1	1	1	1
SBIC-310	Helen Keller walked into a bar and then a chair, and then a table	0	0	0	0	0
SBIC-311	Her friends knows I fucked her but I deny it and they respect me for that and let me hit too. It a like collateral effect..	0	0	0	0	0
SBIC-312	Her:: (talking about her sister): I'm worried that her whole life is going to fall apart and she'll be living in a trailer park. Me:: Not that there's anything wrong with that. Her:: Of course not...but she can't raise her kids in a trailer park. I was with two middle-aged, upper-middle class women after a domestic violence advocacy meeting. I grew up in a trailer park and loved it. Made me feel …	0	0	0	0	0
SBIC-313	Hey normies, if you are not sure whether a girl likes you, she doesn't im sorry, but its true.	0	0	0	0	0
SBIC-314	Hey son, you know what your brother said when he lost his virginity? Dad, please don’t. Your exactly right.	0	0	0	0	0
SBIC-315	Hi brothers and sisters , i live in wiltshire so if there is anyone else here from wiltshire let me know .	0	0	0	0	0
SBIC-316	Hitler just suck at running He cant even finish a race	1	1	1	0	1
SBIC-317	Hitler set some jews on fire and then jews go to Palestine and kill muslims in it The joke there is no relation	1	1	1	1	1
SBIC-318	Hitler was a good doctor. He cured tons of disabilities.	1	1	1	0	1
SBIC-319	Hitler's birthday it's like, ironic and shit. Holy fuck, I can't believe twitter OKed that username and not "you're sexist as fuck"	0	0	0	0	0
SBIC-320	Holy Balls....LIBERALS ARE THE BIGGEST F'ing idiots ever!!! #tucker #tuckercarlson Russia Russia Russia	1	1	1	1	1
SBIC-321	Hopefully in a few hours I'll have the hair I've always dreamed of. Thanks to me fucking it up earlier this year.	0	0	0	0	0
SBIC-322	How I explain my ordeal of 25 years of Inceldom I haven't lost my virginity because I never lose.	0	0	0	0	0
SBIC-323	How are people with mental disabilities similar to electronic products? Sometimes they are, "batteries not included"	1	1	1	1	1
SBIC-324	How are the Twin Towers similar to a lasagna? They both have ground meat at the bottom	0	0	0	1	0
SBIC-325	How can a woman take u serious when you're a hoe? I mean RT @USER: How can a nigga take you serious when youre a hoe? Lol like..	1	1	0	1	1
SBIC-326	How can you tell that it’s your sisters time of the month? When your dads dick tastes funny.	0	0	0	0	1
SBIC-327	How dare my son not stand for the national anthem. I don’t care if he’s quadriplegic, this is America, that commie fuck.	1	1	1	1	1
SBIC-328	How did Hitler kill so many Jews? Free transportation	1	1	1	1	1
SBIC-329	How did Jews save money on remote communication during WW2? They used smoke signals.	1	1	1	1	1
SBIC-330	How did they know princess Diana had dandruff? they found her head and shoulders in the glove compartment	0	0	0	0	1
SBIC-331	How do Autists deal with school? With a reeeeeeeeee-volver	1	1	1	1	1
SBIC-332	How do you become the most popular kid in school? You shoot it up.	1	0	0	1	0
SBIC-333	How do you call someone with Down that likes other men A Chromosexual	1	1	1	1	1
SBIC-334	How do you execute a retard the electric wheelchair	1	1	1	1	1
SBIC-335	How do you feed a drooling disabled? Just open the cage door and throw him in.	1	1	1	1	1
SBIC-336	How do you get a Korean dad to let you date his daughter? Don't be black.	1	1	1	1	1
SBIC-337	How do you know if your dick is big? When she starts screaming “nooo please stop raping me”	0	0	0	1	0
SBIC-338	How do you know your dad is fucking your sister? When her body isn’t in the freezer.	0	0	0	0	0
SBIC-339	How do you start a rave in Africa? You staple a piece of bread to the ceiling	1	1	1	1	1
SBIC-340	How do you stop a horizon? Push her back down, and slap her if she resists.	1	0	1	1	1
SBIC-341	How do you successfully advertise sleeping pills? You get Bill Cosby to sponsor you	0	1	0	1	0
SBIC-342	How many Jews can you fit in a car? 2 in the front, 3 in the back, and 6 million in the ashtray. I’m so sorry.	1	1	1	1	1
SBIC-343	How many financially central towers can a book take down? Two in new york.	0	1	1	1	1
SBIC-344	How many holes does a German shower head have? 11	0	1	1	1	1
SBIC-345	How many jews died in the Holocaust? Not enough.	1	1	1	1	1
SBIC-346	How many shots does it take for a black guy to tap out? Twenty, apparently	1	1	1	1	1
SBIC-347	How much does it cost to enter the Boston Marathon? An arm and a leg.	0	0	0	0	0
SBIC-348	How to know if you're good at sports Your not good if your not black	1	1	1	1	1
SBIC-349	How to tell if you are ugly If you are over 20 and a virgin, and it's not by choice, then you are ugly.	0	0	0	0	1
SBIC-350	How's America like the Dark Knight Trilogy? No one gives a fuck about Harvey.	0	0	0	0	0
SBIC-351	Humans are like bread. We all come from the same loaf of bread but are differently toasted. But who likes burnt toast?	1	1	1	1	1
SBIC-352	Husband: "Right now, for this Women's Day, I am going to make you the happiest woman in the world!" Wife: "Oh dear, I will miss you!"	0	0	0	0	0
SBIC-353	I BET THE ANTIFA COULDN'T DISRUPT THE NATIONAL REVIEW CRUISE OR SINK THEIR BOAT, NO WAY THEY'RE TOO WEAK AND INEFFECTUAL (fingers crossed you guys, this just might work)	0	0	1	0	0
SBIC-354	I SO HATE liberal people and there NONSENSE on TWITTER> MAY ALL OF THEM get sick of a TERRIBLE Disease and DROP DEAD	1	1	1	1	1
SBIC-355	I Support LGBTQ Activities L - Let’s G - Go B - Beat T - The Q - Queers	1	1	1	1	1
SBIC-356	I Told My American Friend To Smoke A Fag When He Gets Stressed He shot up an Orlando nightclub.	1	1	1	1	1
SBIC-357	I also pulled my son out of public school last year .	0	0	0	0	0
SBIC-358	I am a landlord Every time I have someone who is at least a 7(male or female), I overcharge them on rent.	0	1	0	0	1
SBIC-359	I assume you went to the High Caliber gun show in Houston , I usually go when they are in Conroe and I know the feeling the last two or three times I did n't get much or see anything that really caught my eye .	0	0	0	0	0
SBIC-360	I ate my wife alive! She liked it and we're both doing well, what did you expect, you pervert?	0	0	0	0	0
SBIC-361	I bet my friend $6 I could get him laid The man from the woods was very excited	0	0	0	0	0
SBIC-362	I cant stand that Jamie all through this not 1 person has mentioned the bird hes with get ova it leave @USER alone. Ur ex bird cheated	0	0	0	0	0
SBIC-363	I clean my own toilet as for public toilets and such there is no dirty work there it is an Economical contribution 2508	0	0	0	0	0
SBIC-364	I could never be a liberal because I'm positive my head won't fit up my own ass.	1	1	0	1	0
SBIC-365	I cringe whenever I see a picture of myself from before 2011, because my eyebrows were just so fucking horrendous	0	0	0	0	0
SBIC-366	I did some graffiti on one of the walls of the abortion clinic. "No Children Allowed"	0	0	1	0	0
SBIC-367	I don't think Tucker realized how bad it is and Andrew presented the case well!	0	0	0	0	0
SBIC-368	I don’t know if you guys have ever realized but.. Midget porn is the next best thing to child pornography	1	1	1	1	0
SBIC-369	I don’t think Muslims would be very good at comedy They’d all just bomb the show	1	1	1	1	1
SBIC-370	I feel bad for Ethiopian women... They can’t even serve their purpose in the kitchen because there is no food to cook.	1	1	1	1	1
SBIC-371	I feel bad that my bestfriend got gang raped... And she did not enjoy it as much as I did.	0	0	1	0	1
SBIC-372	I feel guilty because I know his daughter is feeling it 10x worse....the world is a fucking awful place.	0	0	0	0	0
SBIC-373	I feel that since political correctness is such a massive topic it's good to bring it up. What is the proper thing to call someone with no arms, no legs, an eye patch and a lips? Names.	0	0	0	0	0
SBIC-374	I fucked a spastic the other day. Suffice it to say she had a good time. There was saliva coming out of her mouth and she had a hard time getting her words out.	1	0	1	1	1
SBIC-375	I get that, but isn't that what the comment ing is for? If you don't like something or think it looks bad or whatever, leave a comment saying why so I can work to improve my look. [...] I just don't get it.	0	0	0	0	0
SBIC-376	I got a handjob from a blind girl, my friend asked me how was it I replied “Ah blind girls—you have to hand it to them”	1	0	1	1	1
SBIC-377	I got kicked out of my job interview for becoming a Biology teacher.... I guess answering the question “Why do you want this job?” with “To give 10 year olds a practice lesson about my dick” was an inappropriate response.	0	0	0	0	0
SBIC-378	I got my son a trampoline but noooo he just sits in a wheelchair and complains.	0	0	0	0	0
SBIC-379	I got sick after my friend gave me... A box of dynamite.	0	0	0	0	0
SBIC-380	I guess in that case , I will just grow a big fro , and it 's no big deal .	0	0	0	0	0
SBIC-381	I guess the police have a history with this person repeatedly losing their dogs or something? Something bad has them very unhappy.	0	0	0	0	0
SBIC-382	I had no idea that Alabama had this many retarded Democrats in it!	1	1	1	1	1
SBIC-383	I hate The fucking police and I hate the attitude that they have a soon as they fucking speak to you	0	0	0	0	1
SBIC-384	I hate jokes about 9/11 victims they always fall flat	0	1	0	0	0
SBIC-385	I hate when people say tomatoes are fruits and not vegetables. If a gay dude in a wheelchair can be both, why can't a tomato.	1	1	1	1	1
SBIC-386	I have concluded from the "Death Wish" controversy that the left is now trying to portray Jews as Fascists, so they can combine all of their hatreds into a single category to save headspace in their small minds.	1	1	1	1	1
SBIC-387	I have never heard a song by this idiot negro but the press is always talking about everything he says or does .	1	1	1	1	1
SBIC-388	I have one more day of fucking school. God nansemond is fucking retarded	0	0	0	1	1
SBIC-389	I heard today that the niggers were freed from their owners. Then my slave woke me up. What a nightmare!	1	1	1	1	1
SBIC-390	I held a bingo game in Iraq. When I said,"B-52!". everyone left.	0	0	0	0	0
SBIC-391	I hope Trump doesn't casually mention at his next rally how rape culture is tolerated in professional and college sports.	0	0	0	0	0
SBIC-392	I hope you all accidentally get a fat black bitch pregnant	1	1	1	1	1
SBIC-393	I joined a suicide cult today It’s known as the American Public School System	0	0	0	0	1
SBIC-394	I just can't get over how wadhwa wouldn't believe that woman was a dev because on Twitter, you can "be anybody"	0	0	0	0	1
SBIC-395	I just think that the feminist movement glorifies obesity. It should focus on being healthy, because what it's doing now is just as bad as the mainstream media!	0	0	0	1	0
SBIC-396	I keep trying to understand the phenomenon of why adults are so literal when children are so imaginative. Toys are a caricature of reality	0	0	0	0	0
SBIC-397	I kinda regret looking up articles about Gilbert Baker on FB.. so many people celebrating his death. that's fuckin' twisted man	0	0	0	0	0
SBIC-398	I like my girlfriends like I like my dogs Rescued from a young age and stays in their cage	1	1	0	0	1
SBIC-399	I like my grilled cheese like how I like my Vietnamese villagers. Yellow and Melted.	1	1	1	1	1
SBIC-400	I like my shoes like I like my women In the corner tied up	1	1	1	1	0
SBIC-401	I like my women like I like my chicken. Dead at a young age, drugged, and burnt.	1	1	1	1	1
SBIC-402	I like my women like I like my cigars 7 years old and coming from cuba in a burlap sack	0	1	1	1	0
SBIC-403	I like my women like I like my firewood Chopped up and in my basement	1	1	1	1	1
SBIC-404	I like my women like I like my toasters turned on and in the bath with me	0	0	0	0	1
SBIC-405	I like my women like i like my Jews... cooking.	1	1	1	1	1
SBIC-406	I like my women like i lile my whiskey 12 years old and brown.	1	1	1	1	0
SBIC-407	I like you, you don't act gay.	1	1	1	1	0
SBIC-408	I liked a @USER video from @USER URL SMB3 Boss Rush Cave by Zach ~ SUPER MARIO MAKER ~ NO COMMENTARY	0	0	0	0	0
SBIC-409	I lived in texas when i was younger , i know how tough some things can get . `` rasslin animals '' is half the fun	0	0	0	0	0
SBIC-410	I looked at the discussion and it is obvious that we are outnumbered by non-whites and race traitors and follow the other followers types .	1	1	1	0	1
SBIC-411	I never look away; I want to stare into your face, The gentle look away; I let my true feelings be sitting here trying to	0	0	0	0	0
SBIC-412	I read recently in cold black and white print that there was around 10,000 nigerians in Ireland ... Now you say close to 300,000 ????!	0	0	0	1	0
SBIC-413	I really wish feminists would stop perpetuating gender roles like the fragile and feckless girl who faints over anything crude; or the hysterical and entitled woman who relies on a man's gentlemanly virtue to get what she wants.	0	0	1	1	1
SBIC-414	I sat next to a femoid on the bus She's probably on the phone with her therapist crying about a depressive episode now.	1	1	1	1	1
SBIC-415	I so hate democrats they are some sore losers my gosh they are fucking annoying.	1	0	1	1	1
SBIC-416	I suspect that Hillary Clinton was using the Awan brothers to spy on members of Congress in order to gather blackmail material for when she became president.	0	0	0	0	0
SBIC-417	I think by now, we can safely assume the shooter was NOT WHITE If he WERE white, we'd already know his name, address, family, where he works, who he voted for (as long as it's Republican), and anything else he may or may not have done that would make him out to be a loony, right-wing, gun nut	1	1	1	1	0
SBIC-418	I think that it is fair to say that the National Alliance is a secular organization that has taken a specific stance against multicultural Christianity for political reasons and has also had prominent members who have promoted non-Christian religions or spiritual paths .	0	0	0	0	0
SBIC-419	I titty fucked this 80 year old last night and her tits just went *-POOF-*	0	0	0	0	0
SBIC-420	I want to access my Internet pretty much the same way I access my broadcast TV signals or my radio stations If I WANT to watch, listen, participate, I watch, listen, or participate If I find something I disagree with, don't support, or feel is too far outside my values, I CHANGE CHANNELS Simple	0	0	0	0	0
SBIC-421	I warned everybody awhile back that Bannon plans on running for President in 2020.	0	0	0	0	0
SBIC-422	I was craving chicken nuggets so fucking bad. Thank u morning star for ur veggie nuggest even tho that wheat allergy will bite me in the ass	0	0	0	0	0
SBIC-423	I was having sex with this GERMAN girl Then my uncle who molested me as a kid killed her out of jelousy. He molested me when I was NEIN	1	0	1	1	0
SBIC-424	I was hoping for a killer deal at the Mandalay Bay but it's still $410 a night. It's not like people are dying to get in there. also Who do I gotta kill to get a better price on a room	0	0	0	0	0
SBIC-425	I was saying that to him to GTFO once realized what he meant and what trying to do. Make me feel guilty then he did instead	0	0	0	0	0
SBIC-426	I was washing the car with my 2 year old daughter. When she started crying, my wife told me to put her down.	0	0	0	0	0
SBIC-427	I was with a Jewish boy in DT Food today. I said to him "One oven a day keeps the Jews away" He hasn't talked to me since.	1	1	1	1	1
SBIC-428	I wish GPS' had an avoid ghetto" setting!"	1	1	1	1	1
SBIC-429	I wish my grass was emo... So it could cut itself.	0	1	1	0	0
SBIC-430	I would make a transgender joke, but... ...Mom always told me not to make fun of the mentally ill.	1	1	1	1	1
SBIC-431	I'd say a fitting punishment is dealing with the developmentally challenged children for the rest for your life .	0	1	1	1	0
SBIC-432	I'll only accept a #Firefly reboot if @USER's Wash is miraculously found unharmed and he's cast in the show.	0	0	0	0	0
SBIC-433	I'm at the coast and walking along the cliff edge... As the path narrows and gets closer to the very edge, I see a young girl crying. So I stop and ask her what's wrong. She says whilst sobbing heavily "My, my mo, mo, mother has fallen off, I, I, I think she's dead." So I look over the edge and sure enough, her mother is at the bottom, all mangled and covered in blood, dead as dead can be. I turn…	0	1	0	1	0
SBIC-434	I'm fucking sick of double standards! Santa can go into a child's room and empty his sack but when i do it it's all tears and policemen.	0	0	0	1	0
SBIC-435	I'm glad you're not allowed to swear anymore. It scares of the kids I'm trying to sext.	0	0	0	0	0
SBIC-436	I'm guessing that you are not from Ireland as then you would know how well organised AFA are .	0	0	0	0	0
SBIC-437	I'm like JFK and my wife is like the people beside him. She screams and tries to get out of the car as I splatter all over her, teach that fucking bitch to wash dishes next time.	1	1	1	0	1
SBIC-438	I'm naturally bowlegged.. I be trying to stand normal . I think i look deformed while hoes thinking that shit is cute.	0	0	0	0	0
SBIC-439	I'm not racist. One of my best slaves is black.	1	1	1	1	1
SBIC-440	I'm tired of all the Holocaust jokes that's why we gas them.	1	1	1	1	1
SBIC-441	I've always been comfortable and open and extremely honest and truthful about my sexuality that is I absolutely want everyone know who the real me is I'm just a loving caring respectful Bisexual Trump Supporter Atheist	0	0	0	0	0
SBIC-442	I've been reassuring him and the family that it's okay - losing a dog would have been devastating to that family.	0	0	0	0	0
SBIC-443	If I had to choose only one tv channel, I will go for Diva. I love the series, movies even the ads and all.	0	0	0	0	0
SBIC-444	If I was president.... I would gather all the people with ADHD and put them in concentration camps..	1	1	1	1	1
SBIC-445	If UCONN somehow manages to win this game, they'd better erect a fucking statue of Gabby Williams in Storrs.	0	0	0	0	0
SBIC-446	If a bitch is bad n single she single fo a reason....hoe prolly cray or a runna	1	1	1	0	1
SBIC-447	If a deaf person has Parkinson's disease, do they also have Tourette's? Three disabilities in one joke. That's pretty good	1	1	0	1	1
SBIC-448	If all these people are actually just immigrants seeking a better life and not invaders why do they act like an invading army	1	1	1	0	1
SBIC-449	If feminists are the champions of women, why do they openly mock the looks & intelligence of Sarah Sanders & Kellyanne Conway?	0	0	0	0	0
SBIC-450	If one day you wake up as Chad, what would you do in order to become a successful person?	0	0	0	0	0
SBIC-451	If somebody brought my ugly ass horchata you would have my heart for life	0	0	0	0	0
SBIC-452	If the government is shut down and I don't notice any difference, I should be able to get a full refund on the money they've taken that I'm apparently getting nothing in exchange for.	0	0	0	0	0
SBIC-453	If you are what you eat... Then Africans must be nothing!	1	1	1	1	1
SBIC-454	If you can keep your head whilst everyone else around you is losing their's... Than you're probably in an Arabic country fighting for Isis.	1	1	1	1	1
SBIC-455	If you can stop a comma with a period point, what do you use to stop a coma? A hollow-point.	0	0	0	0	0
SBIC-456	If you don’t have a self story to tell about “Sexual Assault” either you are; or were not charming or you are out of fashion- #MeToo	0	1	1	0	1
SBIC-457	If you ever hated on me... bitch naw I don't fuck wit you	0	0	0	0	0
SBIC-458	If you hit a girl Is it destruction of property?	1	1	1	1	1
SBIC-459	If you look like me, you should just give up and/or kill yourself I won't show what I look like but you'll get what I mean.	0	0	0	1	0
SBIC-460	If you shoot up a home schooled kid at home is it considered a school shooting Serious question	0	0	0	1	0
SBIC-461	If you're a 7-8/10 minority, you can't even compete with 5-6/10 white guys Honestly, if you're a minority incel, suicide is the better option.	1	1	1	1	1
SBIC-462	Im not sure of a site but those stats are from `` The Color Of Crime '' book .	0	0	0	0	0
SBIC-463	Im not ugly cause im fat, im fat because im ugly	0	0	0	0	0
SBIC-464	Imagine doing music GCSE/A level and having to lug around a fucking harp	0	0	0	0	0
SBIC-465	In 1977, a prominent feminist lawyer Ruth Bader Ginsburg wrote the “age of consent” for sexual acts should be lowered to the age of 12.	0	0	0	0	0
SBIC-466	In hood posted like light pole dey use to call us track &#127939;&#127997;stars&#128171; b4 da cars stopped we rann to dem cars&#127941;&#128176;&#128175;&#129297;&#128170;&#127998;	0	0	0	0	0
SBIC-467	In the UK we go to New year countdowns for shots and fireworks In America we go to school	0	1	1	1	0
SBIC-468	Irony: Being put on trial for killing a homosexual but then swearing on a bible which tells you to kill gays (Leviticus 20:13)	1	0	1	1	1
SBIC-469	It is also what i and almost everyone on this thread dream about and work for after all it is the only asurance the Aryan people have for survival	0	0	0	0	1
SBIC-470	It's not my responsibility to locate , isolate or else eliminate trolls at this site , nor do I wish to defend this person in any way .	0	0	0	0	0
SBIC-471	It's not rape If you yell "Surprise!"	0	0	1	1	1
SBIC-472	It's the Marine Corps Birthday Tomorrow One former marine started celebrating early by buying a bar free shots.	0	0	0	0	0
SBIC-473	Its so sad how fucked up we've been treated in this country that we dont even believe what the government says anymore	0	0	0	0	0
SBIC-474	Jesus gave 6 million people bread and wine But Hitler made 6 million Jews toast	1	1	1	0	1
SBIC-475	Just bout gave up on this season of Big Brother 19 because of Paul, Raven, Elena, and Mark just can't deal with them anymore so I'm focusing more on SURVIVOR and also easing my way catching up on Wrestling also other Pop Culture shows and stuff	0	0	0	0	0
SBIC-476	Just for study, let's go see what happened there Sure there's a timeline, (just a beginner here) will likely mess that up	0	0	0	0	0
SBIC-477	Just played: Broken Into Better Shape.wav - GOOD OLD WAR -Tell Me What You Want From Me (Radio Edit) - unknown(unknown)	0	0	0	0	0
SBIC-478	Just read about the Heroes 2.0 Mastery Taunts. How often do you ever have time to taunt in Heroes of the Storm?? What a stupid edition	0	0	0	0	0
SBIC-479	Just smile for me baby, let me see that pretty smile.	0	0	0	0	0
SBIC-480	Just the content of the tweet, not the name of the person that sent it. Pref with a screenshot.	0	0	0	0	0
SBIC-481	Just went to my first Chanukah party Had now idea that Jews were so adept at frying	1	1	0	0	1
SBIC-482	Kenny done fucked around and got crazy with the visuals... well I'll be	0	0	0	0	0
SBIC-483	Know the best part about raping a midget? When they scream like a fucking child.	1	1	1	1	1
SBIC-484	Koreans do anything to achieve their purpose. URL #Pakistan #UAE #Israel #Palestrina	0	1	1	0	1
SBIC-485	LYDIA KISSED STILES CUZ HE WAS HAVING A PANIC ATTACK! CAN MY CRUSH STOP MY PANIC ATTACKS WITH A KISS PLEASE !!	0	0	0	0	0
SBIC-486	Labour started as a party for 'the people' and under @USER it seems to represent an ideology that would see said people destroyed	0	0	0	0	0
SBIC-487	Laptops are like paralyzed children. They are very mobile, and they cannot run that well.	1	1	1	0	1
SBIC-488	Left wanted to push normalization of Nazism as they target the right as all Soclist Nazi nationalist and they have achieved there goal but how do we handle this issue we all know the power of voting with silence will be ours but that just leaves violence as a choice for the Left not winning.	0	1	1	0	0
SBIC-489	Leicester FC rising up the league, almost from the dead. Resurrection, U might say. Shakespeare's got it right. Richard 3 found in carpark.	0	0	0	0	0
SBIC-490	Let's hope they rot in hell. Yeah, that's how the Trumpocalypse makes me feel &#128544; URL	1	1	1	1	1
SBIC-491	Life RT @USER: I'm not giving these hoes free meals so they can go lay up with the dude they can't get over. Nope.	0	1	1	0	0
SBIC-492	Life is like a box of choclate It dosent last as long for fat people	1	1	1	1	0
SBIC-493	Look, the only live action Disney remake I want is the Emperor’s New Groove and I want there to be no CGI	0	0	0	0	0
SBIC-494	Maichard and DTBY give us a roller coaster ride of emotions. That is why we love them. #ALDUBKSGoesToUS	0	0	0	0	0
SBIC-495	Male vs female as victims of abuse (x-post from r/divorce with permission)	0	0	0	0	0
SBIC-496	Man that run game ain't no hoe. Fuck Alex. don't even need his bitch ass	0	0	0	0	1
SBIC-497	Mana would legit be a retard driving an F1 car and telling the people that are made up of 3 vienna sausages.	1	0	1	1	0
SBIC-498	Mark Richardson was on the 92nd floor of the world trade center on September 11th. What was the first thing that went through his mind when the planes struck the towers? The 93rd floor.	0	0	0	0	1
SBIC-499	Me suki suki you long time!	0	0	1	0	0
SBIC-500	Me:: Hi, I'm _________. Non-Korean person:: Are you Korean?? Me:: ....... Yeah."" Person:: I LOVE Korean dramas and k-pop! Then, I am excitedly told a list of all the favorite Korean actors, dramas, and singers. I'm not into the Korean dramas nor the k-pop... still don't know what she was raving about.	0	0	0	0	0
SBIC-501	MeToo Movement Femoid Likens Being Hit on in Public to Being Mugged.	1	0	1	1	1
SBIC-502	Mladic jailed, the good news just keeps on coming.	0	0	0	0	0
SBIC-503	Mob boss: So, are you willing to kill women and children if necessary? “I’m a film major, I shoot disappointments for a living“	0	1	0	0	1
SBIC-504	Mohammad Salah: second best Muslim attacker… …after Bin Laden	0	1	1	1	1
SBIC-505	Much love + respect to @USER for tying the Big O in trip-dubs tonight. Dude is a force and the clear #MVP. Not to mention @USER alum!	0	0	0	0	0
SBIC-506	Murder is one sure way to live longer than other people.	0	0	0	1	0
SBIC-507	My German girlfriend likes to rate our sex between 1-10. Last night we tried anal, she kept shouting 9! That's the best I've done so far.	0	0	0	0	0
SBIC-508	My bible says what applies to men applies to women so don't tell me it's a man's nature to cheat & they are weak,don't tell me that rubbish	0	0	0	0	1
SBIC-509	My brother was my favorite vegetable After the car accident	0	1	0	0	1
SBIC-510	My dad has always told me back in his day you had to walk uphill both ways through a foot of snow to get to school That ain’t nothing. My generation has to walk through open fire.	0	0	0	0	0
SBIC-511	My daughter has gotten to the age where she asks me embarrassing questions about sex. Just this morning she asked me "is that the best you can do?"	0	0	0	0	0
SBIC-512	My daughter killed a butterfly so I said, “no butter for a month,” The next day she killed a cockroach. Nice try.	0	0	0	0	0
SBIC-513	My daughter said she wanted to see her siblings. So I cum on her eye.	1	0	0	0	0
SBIC-514	My favourite sex position is the JFK I splatter all over her while she screams and tries to get out of the car.	0	0	0	0	1
SBIC-515	My friend asked me how many students are in my class and I said 27 and a half... He asked how can you have a half? And I replied "one can't walk"	1	1	0	0	1
SBIC-516	My friend married a cancer patient. Looks like he got himself a honeymoon.	0	0	0	0	1
SBIC-517	My girlfriend broke up with me for stealing her wheelchair I know she'll come crawling back eventually	0	1	1	0	1
SBIC-518	My girlfriend called me a pedophile. I never knew 1 years old could talk. Especially with a dick in the mouth.	1	1	0	0	1
SBIC-519	My grandfather once told me, "Your generation is too reliant on technology." So I replied, "No, your generation is too reliant on technology!" Then I disconnected his life support.	0	0	0	0	1
SBIC-520	My humour is so dark that cops are beating it	1	0	0	0	0
SBIC-521	My lil cousin be hating. Bitches always want the older nigga, not my fault nor did I fuck the bitch so chill..lol	0	0	1	0	1
SBIC-522	My name is Jafar I come from afar I have a bomb in my car Allahu Akbar	1	1	1	1	1
SBIC-523	My sense of humor is a lot like food Not everybody gets it.	0	0	0	0	0
SBIC-524	My slaves are like Minecraft trees They give me wood when I beat them	1	1	1	1	1
SBIC-525	My son pointed at a homeless man and said "Human waste!!" I was so ashamed and embarrassed I told him its "waste of a human". Kids are so dumb.	1	1	1	1	0
SBIC-526	My wife gets so fed up of our baby's incessant crying that... She gets tries to push our baby back into the hole it came out of.	0	0	0	0	0
SBIC-527	My wife says I should break the rules once in a while. Obviously rape is not what she meant.	0	0	0	0	0
SBIC-528	Name one positive about Africa. The HIV Tests.	1	1	1	1	1
SBIC-529	Netflix censored Bill Nye episode to remove segment about biological basis for gender • r/videos	0	0	0	0	0
SBIC-530	Niggas don't hate yall man, they just don't like you as a person. &#128514;&#128514;&#128514;	1	1	1	1	1
SBIC-531	No, I'm not telling anyone what their score is. Then it'll just turn into a contest for GamerGate to try to 'win'.	0	0	0	0	0
SBIC-532	Not All Straight Men - I am frustrated. Unlike on OKCupid, queer folks don&#8217;t have the ability to block... URL	0	0	1	0	0
SBIC-533	Now I feel sick now Maddie gotta get her ass beat &#129314;	0	0	0	0	0
SBIC-534	Now on Britains pressing issues: can occasion cards be too offensive? Find out after we bubble wrap this child.	0	0	0	1	0
SBIC-535	OH GOD IT LOOKS BAD THIS IS WHY I DONT FUCK WITH HIGHWAYS AND INTERSECTIONS	0	0	0	0	0
SBIC-536	Offensive Joke #2 What is the difference between a Jew and a pizza? The pizza doesn't scream when you put it in the oven	1	1	1	1	1
SBIC-537	Oh god. I am so stubborn. Just realized the only thing it took to push me off the fence in the real name/pseudonym debate was jason/wadhwa.	0	0	0	0	0
SBIC-538	Oh my God! Yea, that shooting at Haas last week was so crazy! I feel like I go to a ghetto school now!	0	0	1	0	1
SBIC-539	Ok so all in all I loved Rogue One. They did some fanservicey shit i didn't care for but overall it was fantastic	0	0	0	0	0
SBIC-540	Old woman:: "Schools shouldn't offer free lunches to kids, since that means their parents just take advantage, and don't bother trying to find jobs to support their kids." Me:: "So you think we should allow kids to starve?!" Woman's husband:: "You see [myname], if you give them handouts, these people don't work. When I got out of high school, if you wanted to eat, you had to find a job. Nobody ha…	0	0	0	0	0
SBIC-541	Only 1 in 700 people will get this... An extra 21st chromosome.	0	1	0	0	0
SBIC-542	Only snowflake libtards believe anything that scumbag wrote in his crappy book!	1	1	1	0	1
SBIC-543	Over 2000 people went to Vegas to meet Jason Aldeen 58 also got to meet Tom Petty.	0	0	0	0	0
SBIC-544	Owens vs. Jericho is one of the most intense, one of the most longest built matches on this #Wrestlemania card. It shouldn't be on 2nd.	0	0	0	0	0
SBIC-545	Parents: If YOU do not teach your children the rich, vibrant, and yes, sometimes controversial, history of your own locale, your region, your State, and your Country, they will be taught the Leftist version...sterilized, false, misleading, twisted, and full of intentional Social Justice overtones	0	1	0	0	0
SBIC-546	People are like chicken... They taste better deep fried.	0	0	0	0	1
SBIC-547	People blaming ref &#128584;&#128584; haha Think he's been ok. No arguments. We're stupid. So dumb at times its untrue	0	0	0	0	0
SBIC-548	People grandmothers want to get fucked up today cause I don't have time for their nasty ass attitude and rudeness &#128127;&#128548;&#128548;	0	0	0	0	1
SBIC-549	People told me to stop inviting disabled people to my farm. Well, they're right. When I buried them, the vegetables didn't grow!	1	1	1	1	1
SBIC-550	Please do not talk to me about OJ and parole as long as Casey Anthony walks this earth.	0	0	0	0	0
SBIC-551	Please go to GoFundMe and put in dachshund needs help. My cream girl who is three yrs old has lost her feeling in the back.	0	0	0	0	1
SBIC-552	Please stop with all of the karma/negative comments. There's a bigger issue here than the person that was targeted.	0	0	0	0	0
SBIC-553	Pretty sure Richard Gilmore is Cracker von Patriarch.	1	0	0	0	1
SBIC-554	REMINDER: femoids would rather fuck ABUSIVE CHADS than an incel But don't forget that your personality is the problem.	1	1	1	1	1
SBIC-555	RT @USER: Cue the liberal left's Uncle Tom attacks against Tim Scott in 4...3...2... #tcot #teaparty #GOP	1	0	1	1	0
SBIC-556	RT @USER: Ungrateful bitches ... URL	0	0	0	0	1
SBIC-557	RT @USER: I'm tired of fat hoes calling themselves "thick". Bitch, yo fat ass can't even bend over and touch your toes withou ...	1	0	0	1	1
SBIC-558	RT @USER: @USER them klutzy bitches	0	0	0	1	1
SBIC-559	RT @USER: Any Nigga Or Dike Play Pussy Goin Get Fucked & That's On Luv	1	1	1	0	1
SBIC-560	RT @USER: im sick of bitches , bitching about other bitches &#128530;	0	1	0	0	0
SBIC-561	RT @USER: hos will literally do ANYTHING to say they got a nigga dawg &#128514;&#128514;	0	1	1	0	1
SBIC-562	RT @USER: In the car with my frands going FUCKING HYPERSPEED URL	0	0	0	0	0
SBIC-563	RT @USER: I'm really fucking sick of watching the Republican Party be rewarded for flagrantly degrading our democracy.	1	1	0	0	1
SBIC-564	RT @USER: You should want a bad bitch like this URL	0	0	0	0	1
SBIC-565	Raping a stewardess at 30,000’... ... is just plane fucked.	0	0	1	0	0
SBIC-566	Rate Me In Happier Times at 18 (Pic)	0	0	0	0	0
SBIC-567	Recent medical studies shows that obesity can cause lots of problems in pregnant women. I think there’s nothing to worry about it. If a woman is obese, she won’t be pregnant in the first place.	1	0	1	1	1
SBIC-568	Reminder: it is at the very least Not any more difficult for an actual deformed person to find a partner than a conventional but non-attractive one	0	1	1	0	1
SBIC-569	Researchers found out the most important difference between humans and apes Apes lives in Africa	1	1	1	1	1
SBIC-570	Richmond police just made a Kissyface it Leo.	0	0	0	0	0
SBIC-571	Roy Moore: "Trannies are an abomination, repeal gay marriage, put God back into the government" Populist Working-Class Voter: "Okay, whatever nigga I just want a job"	1	1	1	1	1
SBIC-572	Safe havens for ILLEGAL immigrants is absolute nonsense. The left are protecting their voting base by harboring criminals. Citizens b damned	0	1	0	1	1
SBIC-573	Secret Language During the holocaust the Jews had a secret language they used to speak... it went something like this, "OH MY GOD! I'M BURNING ALIVE"	1	1	1	1	1
SBIC-574	See bitches ruin sports kobe don't play no damn football. Either you was looking to be mentioned for stupidity or ya momma a hoe. Or both.	1	0	0	1	1
SBIC-575	Sept 11th 2001 The day al qaeda won the worst game of jenga ever...	0	1	0	0	0
SBIC-576	Seriously, you're not going to pay for her?	0	0	0	0	0
SBIC-577	She always wears such revealing clothing and flirts with all of these guys when we're out. It's just gross and dangerous. I'm not saying that a person deserves to be raped, but...	0	1	0	1	1
SBIC-578	Shocking This is a similiar incident to that of a Boy in England recently who was killed by Muslims for wearing an England Shirt .	1	0	1	0	0
SBIC-579	Shoutout to Subway Australia For fundraising for prostate cancer research in a country dominated by feminists.	0	1	1	0	1
SBIC-580	Shower Thought: If feminism is cancer, is that why ladies afflicted with it often lose their hair?	1	1	1	1	1
SBIC-581	Sitting in the car is a date, watching movies is a date, laying in bed is a date. A date doesn't require your wallet only you're time&#128149;	0	0	0	0	0
SBIC-582	Smack these hoes on they ass like we birthed these bitches	1	0	1	0	1
SBIC-583	So I guess women are now being promoted to the level of the Jews:as long as one says something happened we have to believe it because not possible they would lie	1	1	1	1	1
SBIC-584	So Toronto Police are investigating a `` racist '' `` alt-right '' poster found on a telephone poll near a school .	0	0	0	0	0
SBIC-585	So a girl recently got braces and sees her dad's wheelchair outside which is odd. She then asks her mom what's for dinner. Then mom says, "Wanna try mashed vegies?"	0	0	1	0	1
SBIC-586	So my girlfriend refused to let me have sex with her but she didn't say anything when I put my dick inside her. Maybe because her mouth was taped.	1	0	0	0	1
SBIC-587	So, the Holocaust confuses me... So, the Holocaust confuses me... Like, I don't understand why anyone would want to survive it, because they would still be a jew afterwards...	1	1	1	1	0
SBIC-588	So, water is actually heavier than liquefied dino-dong .	0	0	0	0	0
SBIC-589	Some guy on ig that doesn't even know me; asked me if I had a boyfriend because he liked me. lmao gtfoh boyyy	0	0	0	0	0
SBIC-590	Some twoliners about Ethiopia Why did the Ethiopian mother span dental floss across the desert? So her children could play in the shade for once. How are barcodes actually made? By photographing Ethiopian families. And What do the numbers at the bottom of a barcode mean? How many Ethiopians are standing there. What's considered to be the most dangerous ralley on earth? Through the Ethiopian deser…	1	1	1	1	1
SBIC-591	Sometimes I think I enjoy gay sex... But that's just the French in me	1	1	1	1	0
SBIC-592	Sometimes I think of what I would do in a mass shooting event if I ran out of ammo.	0	0	0	1	0
SBIC-593	Sometimes you have to forgive & forget. Forgive them for hurting and forget they even exist. #ALDUBKSGoesToUS	0	0	0	0	0
SBIC-594	Special ed classes are superior to the rest in, at least, one thing Chromosome average	1	1	1	0	0
SBIC-595	Spreading a woman's legs is like spreading butter It can be done with a credit card but I prefer to use a knife	1	1	1	1	1
SBIC-596	Still out here smilin as much as I can wishin people good days and actually meaning it , little shit but it can make a difference.	0	0	0	0	0
SBIC-597	Stop thinking they have to prove they self when they fucking with a community ass nigga Issa shooter	1	1	1	1	1
SBIC-598	Stupid kids of stupid liberals and stupid bitchs who are of stupid liberals and stupid Governments that are of stupid issues stupid stupid stupid stupid people who get out of jail just so they can go right back for more of there dumb Politcal issues idk what els to say but im the target of there repeated issues that fail.	1	1	0	1	1
SBIC-599	Sure in the primaries and stuff... but the main elections are as simple as ABCD Anyone Besides Commie Democrats	1	1	1	1	1
SBIC-600	Swedish proposal for legal paternal surrender (LPS) gets major support in /r/news!	0	0	0	0	0
SBIC-601	TELL ME MORE @USER I'm not sexist but I don't think I actually find any female comedian funny	1	0	0	0	0
SBIC-602	TRP gets it - Anybody else noticing fat/ugly chicks with handsome guys?	1	1	1	1	1
SBIC-603	Takes pride in his work and is extremely thorough Were not the words I wanted to see printed on my Sex Offenders file.	0	0	0	0	1
SBIC-604	Tanzania Pardoned Two Child Rapists But Called For Arrest Of Pregnant Teens News of the pedophile rapists' release emerged simultaneously as another government official called for pregnant pupils to be taken into custody.	0	0	0	0	0
SBIC-605	Technically legal If you penetrate before she says no its technically not rape	1	0	0	1	1
SBIC-606	Teenage boys wear skirts to school to protest against 'no shorts' policy • r/news	0	0	0	0	0
SBIC-607	Thank you my friend for posting on our section ...	0	0	0	0	0
SBIC-608	Thanks for the #RT! @USER @USER @USER @USER @USER @USER Have a great week!	0	0	0	0	0
SBIC-609	Thanks for the advice i 'll keep that on mind .	0	0	0	0	0
SBIC-610	That was two girls!	0	0	0	0	0
SBIC-611	The Classic Mini Has Been Remastered With New Engines And Tech via @USER URL	0	0	0	0	0
SBIC-612	The Obama Era is the largest collection of treasonous acts upon this country, since it's founding.	0	0	0	0	0
SBIC-613	The Twin Towers were full of Nazis. They did Nazi the planes coming.	0	1	0	0	1
SBIC-614	The body of Mollie, the missing Iowa student, has been found. She was chopped Tibbetts.	0	0	0	0	1
SBIC-615	The entire Series of Step By Step is on Hulu.	0	0	0	0	0
SBIC-616	The fat acceptance movement is the only movement without movement	1	1	1	1	1
SBIC-617	The first thing I do When I see a new haiku Is count syllables	0	0	0	0	0
SBIC-618	The funny thing about conversing with kikes is once you've mastered seeing through their deceptive jewspeak you quickly realize that whole high iq thing is largely a myth	1	1	1	1	1
SBIC-619	The kikes probably put the Leftist up to it , to make it seem like they do n't have total control of everyone .	1	1	1	0	0
SBIC-620	The nine-year-olds at my younger cousin's birthday party think they can beat me in laser tag because they have experience in Fortnite Little did they know I have experience in American highschools.	0	0	0	0	1
SBIC-621	The only people in Obama's administration that didn't break the law were his children.	0	0	0	0	0
SBIC-622	The opposite of being far right is to be way wrong.	0	1	0	0	1
SBIC-623	The red scum will never wake up , ignorant lefties fight for `` their class '' when their making a mockery of their culture and heritage . commie scum ..	1	1	1	1	1
SBIC-624	The slogan on the entrance of Auschwitz was the well-known "work sets you free". But what was the slogan at the exit? "Hot surface. Do not touch."	0	1	1	0	1
SBIC-625	The therapy ads in the banner are, unsurprisingly, a scam.	0	0	0	0	0
SBIC-626	The younger ones will say they are survivors because they were sperm in the men and eggs in the women .	0	0	0	0	0
SBIC-627	There is a special place for snowflake libtards it has many names, mental ward, mental institution, insane asylum, funny farm!	1	1	1	1	1
SBIC-628	There is no doubt in my mind that the #LegacyMedia and academia are intentionally indoctrinating the population with "White Guilt" in every Western nation in a subversive attempt to usher in Communism.	1	0	1	0	1
SBIC-629	There is no thread on r/thebluepill regarding RippedRichAndIncel's atomic black pill 🤔🤔🤔🤔🤔🤔🤔🤔🤔🤔	0	0	0	0	0
SBIC-630	There is one language I don't understand and that language is.....Snowflake libtard!	1	0	1	1	1
SBIC-631	There should be a modernized version of "The Boy Who Cried Wolf" called "The Girl Who Cried Rape"	1	1	1	1	1
SBIC-632	These bitches boringgggg	0	0	0	0	0
SBIC-633	These bitches so broke instead of go get it they quick to go ask for somethin	0	0	0	1	1
SBIC-634	These fat hoes think they slick posting neck up pics and shit	1	1	0	1	1
SBIC-635	These guys took offence earlier because I said "midget" instead of "little person". I was forced to restart my story. I said, "OK, so I was fucking this dead little person..."	1	1	1	1	1
SBIC-636	They do this with criminals who ought to be in jail , they put tracking bracelets on them and the smart ones cut them off before they rape and rob , the dumb ones do n't care and just leave them on .	1	1	0	0	1
SBIC-637	Things Chad doesn't have to deal with or worry about Getting cheated on Getting laid Not getting any matches on Tinder Having to message first Having to be confident Having to ask any girl out Getting attention or validation Getting invited to parties Care to add more?	0	0	1	0	0
SBIC-638	This Fool is Sick on @USER and that's saying something for this Show where Pyschos are the Norm & not the Exception #CrazyIsDaNorm	0	0	1	0	0
SBIC-639	This is fucking retarded	0	0	0	1	0
SBIC-640	This is the 4th act of Leftist terrorism on Trump's supporters since his election -Tennessee Church shooting -Vegas Massacre -Republican Senate baseball game shooting -Texas Church shooting RICO Antifa, Soros, BLM	1	1	1	0	0
SBIC-641	This is what innovation looks like. Horrible organization. Proprietary standards like AZW that have a substantial lack in metadata fields.	0	0	0	0	0
SBIC-642	This is why libtards and Jews call us white supremacists and get away with it .	1	1	1	1	1
SBIC-643	This mf made me cum not 1,2,3, but 4 times tonight. I made him bust 3. Nigga had stamina 4 sho damn ....	0	0	0	0	1
SBIC-644	This random girl came up to me last night & said she was coming home w me. My heart started beating so fast y'all I was SCARED & AFRAID.	0	0	0	0	0
SBIC-645	This truth applies to other subjects we discuss on this board .	0	0	0	0	0
SBIC-646	This why I am the way I am bc mfs is out of this world retarded &#128514;&#128514;	0	0	0	0	0
SBIC-647	To me anal is like a boxing match It's only fun if you knock her out and go till things get bloody	0	0	1	0	1
SBIC-648	To the women marching across the US today Have as many abortions as you’d like Boycott sperm Get sterilized Boycott the patriarchy Kill yourselves in protest	1	1	1	1	1
SBIC-649	Today I found out what the world inferior really meant I was nothing compared to the highly nt group i was eating lunch with, absolutely nothing.	0	0	0	0	0
SBIC-650	Today I got a joke email about adopting a fast-food delivery robot and that was more believable than the Trump presidency #aprilfoolsday	0	0	0	0	0
SBIC-651	Today's read is ANOTHER book published today - @USER Reservoir 13 - couple of chapters in and I want to just sit all day+ read	0	0	0	0	0
SBIC-652	Totally different if I was prepping a meal for him. But y'all on something else if imma reach across he table to cut his chicken...	0	0	0	0	0
SBIC-653	Trade free follows 200x200 or less I don't go first liars get blocked & reported team up 30x30 tweet me &#128123;	0	0	0	0	0
SBIC-654	Travelling with #flybe we will track your flight so we will always be at the airport in time awaiting your arrival @USER	0	0	0	0	0
SBIC-655	Truly sad that we 've decreased education standards to make minority students more successful .	0	1	1	1	1
SBIC-656	Trump and hitler are similar but Atleast hitler knew when to kill himself	0	1	1	0	1
SBIC-657	TwoX agrees that the gender pay gap doesn't exist!	0	1	0	1	0
SBIC-658	Ugh, I can't. @USER Nothing quite as degrading as a man using a feather duster. #GenderRoleShock #NotSexist #JustManly	0	1	0	0	1
SBIC-659	Ugly but got the balls to talk not like your pussy ass #mcm	0	0	0	1	1
SBIC-660	Update: apparently my whole family ate dinner without me cos they thought i ate :)))) i was starving waiting to eat together with yall :))))	0	0	0	0	0
SBIC-661	User talks about his perspective on being a young parent	0	0	0	0	0
SBIC-662	Vince once again fucked over Undertaker over a blind push. 'Taker is over now, and so is me as a @USER fan. #VinceScrewedTaker	0	0	0	0	0
SBIC-663	WOW TOP SHELF HUMOR @USER What's the point in having a cleaning lady when I have a mom and a sister? #NotSexist	1	1	1	1	1
SBIC-664	Wait, can I catch your Asperger's?	0	0	0	0	1
SBIC-665	Wanna hear the biggest lie? "Men and women deserve equal rights"	1	1	1	1	0
SBIC-666	Wasn't that when Steve and Bean got their heads cracked opened ?	0	0	0	0	1
SBIC-667	We are all entitle to our feelings toward any politicians (R or D)...just don't @ me, unless I ask for your feelings.	0	0	0	0	0
SBIC-668	We don't keep eating utensils in the car. That's what FAT FAT FAT people do.	1	1	1	1	1
SBIC-669	We have a saying in South Africa : As die kop dom is moet die lyf sukkel .	0	0	0	0	1
SBIC-670	We have enslaved entire species of animals because we think that they are cute... but I kidnap one cute schoolgirl and the nation goes mad!	0	0	1	0	1
SBIC-671	We must never forget what happened during the Holocaust. Three million survived.	1	1	1	1	0
SBIC-672	We were just kids when we fell in love Not knowing what it was I will not give you up this time.<3 — thinking about old memories	0	0	0	0	0
SBIC-673	Well, if the Ambassadors won't hang Trump's picture maybe we should just hang the Ambassadors.	0	1	1	1	1
SBIC-674	What Do A Woman And A Bar Have In Common? Liq-Her In The Front, Poke Her In The Back.	0	1	1	1	1
SBIC-675	What a fucking goal! Zaha to Puncheon to Townsend to Benteke Goal!!! &#128293;&#128293;&#128293;&#128293;	0	0	0	0	0
SBIC-676	What a load of crap.Water are ye people for real Ireland is been taken over by non Irish and this rubbish .	1	1	1	1	1
SBIC-677	What a nice feeling to be in love with God. No pain. No heartache. No disappointment. Just blessings and non stop joy.	0	0	0	0	0
SBIC-678	What an excellent book, reading it now and seeing clearly the cycles that repeat.	0	0	0	0	0
SBIC-679	What are the advantages of being blacc? You can attend a funeral naked...	1	1	1	1	1
SBIC-680	What did Hitler tell the jews when they can't solve a riddle. take a gas	1	1	1	1	1
SBIC-681	What did the Catholic priest say when asked if his profession hinders his chances of getting laid? "Ahh nah it's all child's play"	1	1	1	0	1
SBIC-682	What did the homeless man get for Christmas? Hypothermia	0	1	1	0	1
SBIC-683	What did the jew say to the other jew? Jew: Is something burning?	1	1	1	0	1
SBIC-684	What did the kid who stole the gun from the school shooter say? My Turn!	0	0	0	1	1
SBIC-685	What did the kid with down syndrome get in his test? 47/46	1	1	1	1	1
SBIC-686	What did the little nerd kid say to his bullies after class? Nothing they're all dead	0	0	0	0	0
SBIC-687	What did the nigger get on his SAT's? Watermelon Juice -Kevin Barnett	1	1	1	1	1
SBIC-688	What do Jews and cars have in common They are full of gas	1	1	1	1	1
SBIC-689	What do brick sidewalks and fat women have in common They both get laid by mexicans	1	1	1	1	1
SBIC-690	What do jews and meat have in common? They're both better cooked	1	1	1	1	1
SBIC-691	What do my wife and the water temple have in common? I can spend hours beating them.	1	1	1	1	1
SBIC-692	What do retards eat on toast? BuDURRRRRRR	1	1	1	0	1
SBIC-693	What do u do after raping Helen Keller? Break her fingers so she can't tell	1	1	1	1	1
SBIC-694	What do you call a Jew with autism? Auschwistic	1	1	1	1	1
SBIC-695	What do you call a black man left hanging? a lynching victim	1	1	1	1	1
SBIC-696	What do you call a black midget in Ireland. A leprecoon.	1	1	1	1	1
SBIC-697	What do you call a black spider? No daddy long legs	1	0	0	1	1
SBIC-698	What do you call a charred hot dog? An Anne Frank	1	1	0	0	1
SBIC-699	What do you call a kid with Down's Syndrome after he smokes 2 blunts? A baked potato	1	1	1	1	1
SBIC-700	What do you call a kid with no arms or legs? Names.	1	0	1	1	0
SBIC-701	What do you call a little boy with no arms and no legs? You call him names.	1	1	1	0	1
SBIC-702	What do you call a muslim girl in a birthday party? Drone target.	1	1	1	1	1
SBIC-703	What do you call a paralysed black man ? Useless	1	1	1	1	1
SBIC-704	What do you call a person with no arms or legs in the ocean? Bob	0	0	0	0	0
SBIC-705	What do you call a picture of smoke? A Jewish family photo	1	1	1	1	1
SBIC-706	What do you call a special jew? Auschwistic	1	1	1	1	1
SBIC-707	What do you call a white girl that can run faster than her brothers? The redneck virgin	1	1	1	0	1
SBIC-708	What do you call a white girl who’s faster than her brothers? A redneck virgin	1	1	1	1	1
SBIC-709	What do you call an Hispanic group that targets black people? The Que, Que, Que	1	1	1	1	1
SBIC-710	What do you call an adopted fat person thats retarded? Hammy downs.	1	1	1	1	1
SBIC-711	What do you call an autistic child after they’ve been hit by a car? Mashed potatoes	1	1	1	1	1
SBIC-712	What do you call an autistic gymnast? A leo-Tard	1	1	1	1	1
SBIC-713	What do you call an orgy of retards? Veggie salad.	1	1	1	1	1
SBIC-714	What do you call it when you are beating up a mentally insane person? Busting A Nut	1	1	1	1	0
SBIC-715	What do you call it when you kill 3 old people? Geri-hat trick	1	0	1	0	1
SBIC-716	What do you call it when you throw a Molotov cocktail into the special-ed room? Hot potato	1	1	1	0	1
SBIC-717	What do you call vegetables that are having a threesome A triple cripple	1	1	1	1	1
SBIC-718	What do you do when you are done fucking the tightest pussy? You put it back in the womb.	0	0	0	1	1
SBIC-719	What do you get by dragging 50 dead babies through a field? A boner	0	0	0	0	1
SBIC-720	What do you get when an Autistic child gets in a car crash? Mashed potatoes.	1	1	1	1	1
SBIC-721	What do you get when someone bullies a really autistic kid? 20 casualties.	1	1	1	1	1
SBIC-722	What do you get when you mix human DNA and goat DNA? Kicked out of the petting zoo.	0	0	0	0	0
SBIC-723	What does a homeless man get every day that a normal person doesn't? Hungry.	0	0	0	0	1
SBIC-724	What does a redneck girl say when she meets her first lover? Hi dad!	1	0	1	1	1
SBIC-725	What does life and a box of chocolates have in common? It doesn't last as long if you're fat.	1	1	1	0	0
SBIC-726	What does the crippled, mute, deaf and blind Hannah get for Christmas? Cancer	1	1	0	1	1
SBIC-727	What does the president say to get rid of all the black people in his country? Nothing. He just opens the cage.	1	1	1	1	1
SBIC-728	What falls harder, rain or snow? World Trade Center.	0	0	0	1	1
SBIC-729	What happens when you grill up a retard You get assburgers	1	1	1	1	1
SBIC-730	What is another way to describe a school shooting? Population control	0	0	1	1	1
SBIC-731	What is black and sits on the top of the stairs A cripple in a house fire	1	1	1	1	1
SBIC-732	What is that in the background, a giant lawn chair?	0	0	0	0	0
SBIC-733	What is the difference between a crucifixion and a circumcision? In a crucifixion, they throw out the whole Jew.	1	1	1	1	1
SBIC-734	What is worse than Hitler,Stalin,Mao Nd PolPot put together That stupid Chadbot	0	1	0	0	1
SBIC-735	What is worse than finding a worm in your apple? AIDS	0	0	0	0	0
SBIC-736	What martial arts type was hitler scared of? jewjitsu	1	1	1	1	1
SBIC-737	What never eats but still is alive? The children of africa	1	1	0	1	1
SBIC-738	What part of a vegetable cant you eat? The wheelchair	1	1	1	1	1
SBIC-739	What runs faster then a mexican who just stole your TV? His cousin with the DVD player	1	1	1	1	1
SBIC-740	What should you never give a dyslexic person for breakfast? Alpha-bits	1	1	0	1	1
SBIC-741	What the difference between jelly and jam? I can't jelly my dick into an 8 year old.	0	1	0	1	0
SBIC-742	What the fuck is wrong with these players? No fighting spirit whatsoever! Losing the ball and then walking!!!!	0	0	0	0	0
SBIC-743	What were the best r/pussypassdenied moments in your life?	0	0	0	0	1
SBIC-744	What would a overdose victim’m eulogy be? “They died doing what they loved.”	0	0	0	0	1
SBIC-745	What's Hitler's favorite breakfast beverage? Freshly squeezed orange jews.	1	1	1	1	1
SBIC-746	What's Hitler's favorite time of the year Gas season	0	1	1	0	1
SBIC-747	What's a 1000 meters long and has an IQ of 68? A black lives matter parade.	1	1	1	1	1
SBIC-748	What's better than a gold medal at the Paralympics? Legs	1	1	1	0	1
SBIC-749	What's better than winning the special Olympics? Not being retarded	1	1	1	1	1
SBIC-750	What's black and blue, and doesn't like sex? The kid in my trunk.	0	1	0	1	1
SBIC-751	What's black yellow and blurry? A bus full of niggers rolling down a hill	1	1	1	1	1
SBIC-752	What's common between Newton and the kid i stabbed to death? Newton Died virgin.	0	1	0	0	0
SBIC-753	What's even worse than black men? Black women feminists.	1	1	1	1	1
SBIC-754	What's she got that stick for if she can read [that book]?	0	0	0	0	1
SBIC-755	What's the best part about using a vegtible for sex? they can't escape.	1	1	1	1	1
SBIC-756	What's the best thing about fucking twenty four year olds? There's twenty of them.	0	0	0	0	0
SBIC-757	What's the brightest star in Africa? Starvation	1	1	1	1	0
SBIC-758	What's the difference between Batman and a black man? Batman can go out at might without robin.	1	1	1	1	1
SBIC-759	What's the difference between Santa Claus and a Holocaust Jew? Santa Claus is jolly, fat, and goes DOWN the chimney.	1	1	1	0	1
SBIC-760	What's the difference between Santa and the Jews? Santa goes down the chimney.	1	1	1	0	1
SBIC-761	What's the difference between a Black Lives Matter rally and this sub? Nothing, they both hate white people.	1	1	1	1	1
SBIC-762	What's the difference between a black person and a bucket of shit? The bucket.	1	1	1	1	1
SBIC-763	What's the difference between a blonde and a mosquito? A mosquito stops sucking after you slap it	1	0	1	1	1
SBIC-764	What's the difference between a feminist and a cry baby? A cry baby stops crying when it grows up.	1	1	1	1	1
SBIC-765	What's the difference between a feminist and a knife? A knife has a point.	0	1	1	1	1
SBIC-766	What's the difference between a fruit and a vegetable? Fruit doesn't scream when you try eating it	0	0	1	0	1
SBIC-767	What's the difference between a jew and a pizza? The pizza doesn't screems when it gets into the oven	1	1	1	1	1
SBIC-768	What's the difference between a priest and a retard? The priest is behind a little and the retard is a little behind.	1	1	1	1	1
SBIC-769	What's the difference between anal sex and oral sex? Oral makes your day. Anal makes your hole weak.	0	0	0	0	0
SBIC-770	What's the difference between heroine and a black person? I think twice about shooting heroin.	1	1	1	1	1
SBIC-771	What's the difference between homeless people and rats? Nothing, they both are infestations to big cities	1	1	1	1	1
SBIC-772	What's the difference between my mum and cancer? My mum didn't beat cancer	0	0	0	0	0
SBIC-773	What's the only warm organ inside a deceased female body? My Dick. (it's not illegal if the cops don't know about it)	0	1	0	1	1
SBIC-774	What's the size of a priest's bed? Come on, every kid should know this.	1	1	1	0	1
SBIC-775	What's the worst part about being a black Jew? You have to sit at the back, of the oven	1	1	1	1	1
SBIC-776	What's the worst part about having sex with some one with downs syndrome? You're fucking retarded.	1	1	1	1	1
SBIC-777	What's worse than raping Helen Keller? Breaking her fingers so she can't tell anybody.	1	1	1	1	1
SBIC-778	Whats black and sits at the top of the stairs? A paraplegic after a house fire.	1	1	1	1	1
SBIC-779	Whats the difference betweeen a feminist and a piece of shit? I don’t know.	1	1	1	0	1
SBIC-780	Whats the difference between a blonde and an elevator? You dont even have to press a button for her to open up.	1	1	0	1	1
SBIC-781	Whats the difference between a tweaker and a black person? The tweaker started out as a good person	1	1	1	1	1
SBIC-782	Whats the difference between hockey player and a women hippie A hockey player showers after 3 periods	1	1	1	1	1
SBIC-783	Whats the hardest bit about eating a vegtable? The wheelchair	1	1	1	1	1
SBIC-784	Whats the hardest part of the vegetable to eat? The wheelchair	1	1	1	1	1
SBIC-785	What’s blue and black and hates sex? A 9 year old girl in my trunk	1	1	1	1	1
SBIC-786	What’s the best part about having sex with twenty nine year olds? There’s twenty of them!	0	1	0	1	0
SBIC-787	What’s the best part of being a doctor? Vegetables don’t need to give consent.	1	1	0	1	1
SBIC-788	What’s the best thing about fucking a 5 year old girl? You can flip her over and pretend she’s a 5 year old boy.	1	1	1	1	1
SBIC-789	What’s the best thing about having sex with 21 year olds? There’s 20 of em	0	1	0	0	0
SBIC-790	What’s the difference between a feminist and an infant? I’d fuck the infant	1	1	1	1	1
SBIC-791	What’s the difference between a potato and my disabled 5 year old? One is a root vegetable the other is a vegetable I root	0	1	1	1	1
SBIC-792	What’s the difference between a women and a computer You can punch information into a computer	1	1	1	1	1
SBIC-793	What’s the difference between heroin and niggers? I’d actually think twice before shooting heroin	1	1	1	1	1
SBIC-794	What’s the difference between roadkill and a 9/11 victim? You can bury roadkill.	0	0	1	1	1
SBIC-795	What’s the difference between your wife and a computer? The computer shuts up after you hit it	1	1	0	1	1
SBIC-796	What’s the hardest part of a vegetable to eat? The wheelchair	1	1	1	1	1
SBIC-797	What’s worse than raping a deaf girl? Breaking her fingers so she can’t tell anyone.	1	1	1	1	1
SBIC-798	When people are presented with data that contradicts their beliefs they become more steadfast in those beliefs and this is especially true with the Left!	0	1	1	0	0
SBIC-799	When two fat American's have sex it's... MISSIONARY IMPOSSIBLE.	1	1	1	1	1
SBIC-800	When you ask a question and the person can't answer it without fckn arguing or jumping to something irrelevant. Well, thanks anyway!	0	0	0	0	0
SBIC-801	When you can be arrested and imprisoned for tweeting your opinion, your government might have too much power.	0	0	0	0	0
SBIC-802	When you say you love me, know I love you more . And when you say you need me, know I need you more	0	0	0	0	0
SBIC-803	Where are Jews most found? In the atmosphere.	1	1	1	1	1
SBIC-804	Where are all the feminist and leftist riots/rallies in the streets against Hollywood's pedophilia and sexual harassment culture?	0	1	1	1	1
SBIC-805	Where could you find a quadriplegic? Where you left him.	1	1	1	1	0
SBIC-806	Who is the best boxer of all time? Jim Jones. He knocked out 909 people with one punch.	0	0	0	0	0
SBIC-807	Who's downtown and wanna buy me a coffee and food bc Wells Fargo is fucking me	0	0	0	0	0
SBIC-808	Why am I crying that I wasnt able to watch last night and all of my friends were telling me how good it was?	0	0	0	0	0
SBIC-809	Why are all blacks and gays left handed? They all have no rights.	1	1	1	1	1
SBIC-810	Why are all women lefty Because they have no rights	1	1	1	1	1
SBIC-811	Why are there so many party stores in the ghetto? Like do all the poor people like to celebrate they're poor?	1	1	0	1	1
SBIC-812	Why can't orphans play baseball? Why can't orphans play baseball? They dont know where home is.	1	1	1	1	0
SBIC-813	Why can't you act like a normal person? You don't have Asperger's. There's nothing wrong with you. You're just looking for attention/excuses. If you'd just stop behaving so oddly, you wouldn't need to blame it on a disease.	0	1	1	0	1
SBIC-814	Why couldn’t Sally go to school Sally has crippling depression	0	0	0	0	0
SBIC-815	Why did Hitler kill the nazi? It was past its jew date	1	1	1	1	1
SBIC-816	Why did Hitler kill the out-of-time drummer? Rhythmic cleansing	0	1	1	1	1
SBIC-817	Why did the feminist jump off the building? She was trying to equalize the suicide rates	1	1	1	1	1
SBIC-818	Why did the sun never set on the British Empire? Even God didn't trust the English in the dark.	1	1	1	1	1
SBIC-819	Why do Puerto Ricans hang the Puerto Rican flag in their car? So they dont steal from each other.	1	1	1	1	1
SBIC-820	Why do blacks only have nightmares? Because the rednecks shot the only one with a dream.	1	1	1	1	1
SBIC-821	Why do epileptics bexome atheists in December? Because they found out that "Jesus is the reason for the seizin'"	0	1	0	1	0
SBIC-822	Why do sumo wrestlers shave their legs? So that people don't confuse them for feminists.	1	1	1	1	0
SBIC-823	Why do the white kids only shoot up schools? cuz all the black kids shot each other	1	1	1	1	1
SBIC-824	Why do we celebrate Hitler's birthday with weed? Cause' he already smoked all the jews.	1	1	1	0	1
SBIC-825	Why does being a Black Jew suck so much? Having to sit in the back of the oven.	1	1	1	1	1
SBIC-826	Why does the myth that women rarely lie about rape persist?	0	1	0	0	1
SBIC-827	Why doesn't Mexico have an Olimpic team? All the ones who can run,jump or swim have allready crossed the border.	1	1	1	1	1
SBIC-828	Why don't bookmakers take bets on the special Olympics? because they're all winners	0	1	1	1	0
SBIC-829	Why don’t Jews get gifts for Christmas? Cuz why the fuck would you give a gift to a pile of ashes	1	1	1	1	1
SBIC-830	Why is chess prohibited in Islam? Because the queen moves freely.	1	1	1	0	1
SBIC-831	Why is the camel called the ship of the desert? Because it’s filled with Arab seamen	1	1	1	0	1
SBIC-832	Why should they ban weed from hospitals? I don't like my vegetables baked.	0	0	0	0	1
SBIC-833	Why should you never rape elderly women? because sex is for procreation you fucking Heathen!	0	1	1	1	0
SBIC-834	Why would you watch porn... When there's an elementary school right down the road.	0	0	1	1	0
SBIC-835	Wind 6.6 mph NNW. Barometer 1029.3 hPa, Falling slowly. Temperature 15.5C, feels like 12.4C. Rain today 0.0 mm. Humidity 51%. f1.	0	0	0	0	0
SBIC-836	With some dog breeds, it's advised that you don't look at them directly in the eye. I've found a simple solution to that problem. Anal.	0	0	0	0	1
SBIC-837	With the help of God we will be congratulating an Irish WN Party on their election success in the not so distant future .	0	0	0	0	1
SBIC-838	With the polarization and hate I'm seeing, it seems to me that there are a lot of people that are going to die soon.	0	0	0	0	0
SBIC-839	Women just keep coming to me and I just keep raping them. They trust this police uniform way too much.	1	1	1	1	1
SBIC-840	Women think sub8 men are creepy; women give birth to sub8 men; therefore women think their sub8 sons are creepy Women are the shittiest people ever to exist.	1	1	1	1	1
SBIC-841	Would Jason Vorhees be considered a chad because of his size and strength?	0	0	0	0	0
SBIC-842	Would the police release evidence of Marc Lépine and Elliot Rodger being baited and goaded by feminists?	0	0	0	0	0
SBIC-843	YALL MOTHERFUCKER NORMIES WILL GET SPOILERS ON SEASON 8 OF GAME OF THRONES IF YOU DONT LEAVE NOW	0	0	0	0	0
SBIC-844	Yall black ass hoes aint east African	1	1	1	1	1
SBIC-845	Yeah I watch the History Channel all the time and I am in all the Honor classes I just wanted to do something and yes I do have the muscle to back it up .	0	0	0	0	0
SBIC-846	Yeah, you might be able to hit a quarter from two miles away with your .300 Win Mag, but I have over 1,000 headshots in Day of Infamy.	0	0	0	0	0
SBIC-847	You CUCKS and Patriots....and my Brothers.....UNITE....ITS TIME !	0	0	0	0	0
SBIC-848	You communicate like a girl, I just don't get it. I'm a guy. You need to just say what you mean!	1	0	0	0	0
SBIC-849	You hear a bunch of machine gun bullets and see a black man slump over dead on your porch, what do you do? Stop laughing and reload	1	1	1	1	1
SBIC-850	You incels are ugly This is why you're incel	1	1	0	1	1
SBIC-851	You just get on an Uber and you keep riding and them get off They are the new whores	0	0	1	0	1
SBIC-852	You know, Fortnite actually reminds of school You hop out the bus and shoot everyone you see.	0	1	0	0	1
SBIC-853	You mad because your bitch found out you a hoe &#128514;&#129335;&#127997;‍♀️	1	0	0	0	0
SBIC-854	You might be gleefully anticipating a day off, only to be conf... More for Aquarius URL	0	0	0	0	0
SBIC-855	You niggas talking to these females trying to get some pussy but dont realize you're only boosting their ego and getting curved.	0	1	1	1	0
SBIC-856	You should have heard of him becouse he is the greatest chess player of all times .	0	0	0	0	0
SBIC-857	Your in ya cell 22 hours a day here u dont in general walk around the landings .	0	0	0	0	0
SBIC-858	[Life Fuel] On-duty NYPD officers handcuffed 17-year-old girl, took her to deserted spot and raped her	0	0	0	0	0
SBIC-859	[META] We knew three years ago that they were creating shill account to control the discussion here.	0	0	0	0	0
SBIC-860	[X-Post]Gang sexually assaulting, killing men in Mumbai - TOI gives only one inch space on front page.	0	0	0	0	0
SBIC-861	``TheDark Romance of Dian Fossey '' ( 1990 ) by Harold TP Hayes Under the mentorship of noted anthropologist Louis Leakey , Dian Fosse spent 16 years in Africa researching the last remaining mountain gorillas .	0	0	0	0	0
SBIC-862	a cop saw a blonde on her knees under a streetlight . " can i help you ? " she asked . the blonde replied , " i dropped my diamond ring and i 'm looking for it . " the cop asked , " did you drop it here ? " the woman replied , " no , i dropped it about a block away , but the light 's better here . "	0	0	0	0	0
SBIC-863	a gay muslim walks into a bar . <repeat> he ordered shots for everyone .	1	1	1	0	1
SBIC-864	a jew , a mexican and a black guy walk into the bar . <repeat> the bartender pulls out his gun and says " get the fuck outta here "	1	1	1	0	1
SBIC-865	a man was brought in on pedophilia and incest charges according to the prosecution , the man had raped his daughter many times . the man however , was very cunning . he had a defense he thought was perfect . in court , the man said , " i have a tattoo on my penis , and i bet my daughter ca n't tell you what it is . " the daughter then said , " well of course i could n't tell , every time you took…	0	0	0	0	0
SBIC-866	a priest asks the convicted murderer at the electric chair , " do you have any last requests ? ” " yes , " replies the murderer . " can you please hold my hand ? "	0	0	0	0	0
SBIC-867	ah why is brushing the hair so damn difficult and exhausting ;-; that's the worst part every morning	0	0	0	0	0
SBIC-868	alabama where eharmony and ancestry are the same website .	1	1	1	0	1
SBIC-869	also the context of this is just, Fucking Horrible	0	0	0	0	0
SBIC-870	anybody that shitted on me, I ain't fucking with none of ya!!!!	0	0	0	0	0
SBIC-871	anything you can do to bait Rich Black NFL and NBA players into attacking Whites is good	1	1	1	1	1
SBIC-872	because in that moment if i had told them when i told the school someone sexually assulted me and they didnt do anything would they believe?	0	0	0	0	0
SBIC-873	black people are like tires they work better with chains	1	1	1	1	1
SBIC-874	cripples what do you call three people in wheelchairs stacked on top of each other ? a vegetable rack .	1	1	1	1	1
SBIC-875	dead baby joke mom : " why are these scissors so sticky ? " son : " sorry , i cut something wet . " mom : what 'd you cut with scissors that was wet ? <repeat> " son : " an infant 's windpipe "	0	0	0	0	0
SBIC-876	drawing for u GOD I AM SO BAD AT DRAWING ITS SO BORING (has pen) god drawing is so fun, omg i wanna drawww (doesnt know where that idiot is)	0	0	0	0	0
SBIC-877	fat bitches fat bitches heeeey	1	0	0	0	1
SBIC-878	fat chicks . <repeat> make uggs look like socks .	1	1	0	1	1
SBIC-879	fred needs crutches , thomas has a terrible stutter they 're best friends . one day , they hear that a faith healer is in town . thomas tells his friend they should go and see if they can make it on stage . fred reluctantly agrees , and they go . even better , they get called on stage . fred explains that he 's always had tto use crutches , even as a child , while thomas talks , with great effort…	0	0	0	0	0
SBIC-880	hey have you seen rolling thunder ? last time i saw him he was burning rubber with the new wheelchair he got from his disability benefits outside of wal - mart .	0	1	1	1	0
SBIC-881	how do they know what shampoo everyone in the twin towers used? they found their head and shoulders everywhere	0	1	0	0	1
SBIC-882	how do you fit a fat woman in a bikini ? take the f out of fat and the f out of weigh .	0	1	1	1	1
SBIC-883	how do you give a redneck aids ? get a black guy to rape his sister	1	1	1	1	1
SBIC-884	how do you kill a retard ? hand him a knife and ask him " who 's special ? "	1	1	1	1	1
SBIC-885	how do you starve a black man . <repeat> put his food stamps under his work boots .	1	1	1	1	1
SBIC-886	how does a redneck find a sheep in his field ? sexy .	1	1	0	1	0
SBIC-887	how many feminists does it take to change a light bulb ? feminists ca n't change anything .	1	1	0	1	1
SBIC-888	how many times can you screw a blonde ? i do n't know , how much time you got ?	1	1	0	1	1
SBIC-889	how to pick up chicks how do you pick up a black chick ? noose . how do you pick up a mexican chick ? border patrol . how do you pick up a muslim chick ? body bag . how do you pick up a jewish chick ? dustpan and brush . how do you pick up white chicks ? flunitrazepam .	1	1	1	1	1
SBIC-890	i hate ole dusty ass mississippi but jus for these moments i gotta be there	0	0	0	0	0
SBIC-891	i knew a guy who died in a terrorist attack . <repeat> his last words were " allahu akbar "	1	1	0	1	1
SBIC-892	i kno this aint canon but tbh cyaron's leader should be you, AZALEA's dia and Guilty Kiss' yoshiko xndnaxmks	0	0	0	0	0
SBIC-893	i like my women like my wine aged <number> years and stored in the cellar	1	1	1	1	1
SBIC-894	i like wanking whilst looking at myself in the mirror . my driving instructor does n't .	0	0	0	0	0
SBIC-895	i named my son michael simon albert timothy charles brian kevin andrew nicholas frederick anthony donald victor alfonse lawrence theodore stephen william jacob alexander richard benjamin arthur daniel aidan lucas john oliver david sebastian henry ryan julian evan cameron dominic leonardo . <repeat> . <repeat> ut the little fucker still did n't drown at the christening .	0	0	0	0	1
SBIC-896	i think i need to find a new girlfriend she is starting to learn to talk now	0	1	0	0	0
SBIC-897	i want a dyke clique	1	0	0	0	0
SBIC-898	i want to be reincarnated as a bacteria living in the pubic hair of the artist IU	0	0	0	0	0
SBIC-899	i will never forgive the rihanna navi for letting KIB flop but that trash ass Needed Me and equally bad LOTB are legitimate HITS!!	0	0	0	0	0
SBIC-900	if any one has any info on the austin texas band Straight Laced any info please contact me at skinranger@USER.com white power 88	1	0	0	0	1
SBIC-901	if i had a dollar for every gender . <repeat> i 'd have $ <number> and a pile of counterfeits .	1	1	1	0	1
SBIC-902	if you donate just <number> pound a month . . . you can help us make another advert with sad looking african children in it .	1	1	1	1	1
SBIC-903	illegal check to the head? are you fucking stupid???	0	0	0	0	1
SBIC-904	in at halle's so she can get stuff to spend the night and i kid you not, i have been in her dang car for a good 20 mins	0	0	0	0	0
SBIC-905	is the glass half full or half empty ? i really do n't know , because there 's different ways to look at it : - optimism : the glass is half full . - pessimism : the glass is half empty . - feminism : the glass is raping me .	1	1	1	1	1
SBIC-906	jews what 's the best jew joke ever ? the holocaust	1	1	1	1	1
SBIC-907	kids of yesterday use to work go to school and work again the kids of today live in basements and play games and text 247 thank you liberals	1	0	0	0	1
SBIC-908	me: do you know who the latest power rangers are from? kids: YES, 2A7! (Their own class) me: /rofl SHUDDUPP	0	0	0	0	0
SBIC-909	my african friend asked me if he could ask for bob and vegene i told him "u better ask for food"	0	1	1	1	1
SBIC-910	my wife told me to get our ginger son ready . . . my wife told me to get our ginger son ready for his first day at school . so i punched him in the face and stole his dinner money .	1	1	1	0	0
SBIC-911	none of them 3 bitches look like dey ca boil a egg, but working at buds broiler....	0	0	1	0	0
SBIC-912	normies dont know what its like to suffer there whole life they have had it easy,barley lonely,never had to deal with mental illness,and yet they pass judgment on us,we have every right to dislike them	0	0	1	0	1
SBIC-913	of course you want to make those habanero pickles, what with this goddamn head cold	0	0	0	0	0
SBIC-914	oh look that's another reason to fucking hate my shit-ass group	0	0	0	0	1
SBIC-915	on a scale of <number> to <number> how much do you love children ? hollywood	0	0	0	0	0
SBIC-916	one. collage. texture + sound + color. How it moves. Why it moves. moments form image. what stories are we telling?	0	0	0	0	0
SBIC-917	porn is like a cancer ward way better when you see kids in it	0	1	0	1	1
SBIC-918	should be a prenatal test to find out if you're gonna have one of those kids with tiny teeth and giant gums.	0	1	0	1	0
SBIC-919	slow replies make me feel like a retard and I just want to put my foot through a wall... hjhdyhdhlgjdftilh	0	0	1	0	0
SBIC-920	so a priest and a rabbi are walking by an orphanage . <repeat> and they see a young boy bending over to pick up a ball . the priest says , " tell me you do n't wanna fuck that little boy . " the rabbi responds , " yes , but out of what ? "	0	1	1	1	0
SBIC-921	some people say i do n't let my wife choose anything , but that 's not true ! i let her choose between front hand and back hand .	1	1	0	0	0
SBIC-922	spanish stereo types are so false bc i'm spanish as fuck and i hate spicy food and have no rhythm in my hips	0	0	0	0	0
SBIC-923	still fucking fumin we drew against Bourneshite, cant wait to get molested at Britannia tmrw	0	0	0	0	1
SBIC-924	that moment when you silence a mage and they start backpedalling and you just KNOW it's about to go down	0	0	0	0	0
SBIC-925	the Brexit snake May must be pleased that throwing that election is bearing fruit.. bitch will fuck Brexit and play the victim - maybe a tear at some stage ?	1	1	0	1	1
SBIC-926	the Nina is my bitch & I might have to rape a nigga , the heater on my waist and I might have to bake a nigga!	1	1	1	1	1
SBIC-927	the blacks and special needs are cursed with ? tardiness	1	1	1	1	1
SBIC-928	the entire system of classes are a marxist invention. the judeo-bolsheviks are using this to divide our society. in other words ' Divide et impera ' .	0	1	1	0	1
SBIC-929	the level 99 one was so fucking bonkers it was glitched im fucking yelling	0	0	0	0	0
SBIC-930	the young homeless girl was delighted when i asked if i could take her home . she was n't too excited when i walked off with her cardboard box .	0	0	0	0	1
SBIC-931	there once was thug named brown who bum rushed a cop with a frown three shots a thunder he 's now <number> foot under and so 's the rest of the town	0	0	1	0	0
SBIC-932	this is a retarded question but what's the Pokemon in your avatar	0	0	0	0	0
SBIC-933	three jews walk into a bar . <repeat> i lied it was a gas chamber	1	1	1	1	1
SBIC-934	trump has been fucking toxic from the start and you fucks who voted for him are just NOW seeing this? IT TOOK YOU THIS LONG #PrayForSyria	0	0	0	1	1
SBIC-935	trump is an idiot . minorities ca n't take our jobs if they ca n't keep our jobs .	1	1	1	1	1
SBIC-936	volkswagen gas emissions scandal . the germans are still trying to gas us .	1	1	1	1	1
SBIC-937	watch out for these foul hoes and flagrant niggas!	1	1	1	1	1
SBIC-938	we should not help poor african children they are not entitled to food, they should be confident and funny	0	1	1	1	1
SBIC-939	we've gone from "Don't Believe It Unless You Hear It Direct From Trump" to "Don't Believe It Even When You Hear It Direct From Trump Cause Sometimes Trump Says The Exact Opposite Of What He Means"	0	0	0	0	0
SBIC-940	went to a paris restaurant for snails today . <repeat> pretty disappointed . <repeat> came out with a gut full of slugs .	0	0	0	0	0
SBIC-941	what 's black and screams ? stevie wonder answering the iron .	0	1	0	1	1
SBIC-942	what 's the best way to wash down five hundred chocolates ? katrina .	1	1	0	1	1
SBIC-943	what 's the difference between a boko haram training camp and a nigerian refugee camp ? i do n't know , i just fly the fighter jet .	1	1	1	1	1
SBIC-944	what 's the difference between a jew and a bullet ? a bullet can escape the chamber	1	1	1	1	1
SBIC-945	what 's the difference between harry potter and jews ? harry escaped the chamber	1	1	1	1	1
SBIC-946	what 's the meanest thing you can do to a blind person ? give them a cheese grater to read .	1	1	1	1	1
SBIC-947	what 's the most common type of shooting range ? a school .	0	1	1	1	0
SBIC-948	what 's the worst thing about being told you have alzheimer 's ? it dosen't happen at once	0	1	0	0	0
SBIC-949	what do you call a good looking muslim ? asif	1	1	1	1	1
SBIC-950	what do you call a high person with downs syndrome ? a baked potato .	1	1	1	1	1
SBIC-951	what do you call a jewish person who 's just been for a shower ? cleansed	1	1	1	1	1
SBIC-952	what do you call a letter from a feminist ? hate male	1	1	0	1	1
SBIC-953	what do you call a mentally handicapped jew ? aushwistic .	1	1	1	1	1
SBIC-954	what do you call a redneck priest ? dad , father and daddy .	1	1	1	1	1
SBIC-955	what do you do when someone is having a seizure in the bath ? throw a load of dirty laundry in .	0	1	1	1	0
SBIC-956	what do you get when you blend a nazi and a communist together ? ground meat .	1	1	1	1	1
SBIC-957	what is a muslim 's favourite band ? the taliband , their performances always blows the audience away	1	1	1	1	1
SBIC-958	what is the difference between a feminist and a suicide vest ? i can turn on a suicide vest .	0	1	1	1	1
SBIC-959	what is the difference between a homosexual and a mentally ill person ? nothing .	1	1	1	1	1
SBIC-960	what is the german translation of ' harry potter and the chamber of secrets ? " harry hitler and the chamber of gas .	1	1	1	1	1
SBIC-961	what is the most important part in a good isis <allcaps> joke ? the * execution *	0	1	1	0	1
SBIC-962	what is the toughest part about being a pedophile ? fitting in .	0	0	0	0	1
SBIC-963	what s the main cause of paedophilia sexy kids	0	1	0	1	1
SBIC-964	what would be another name for black lives matter ? rise of the planet of the apes .	1	1	1	1	1
SBIC-965	whats a gay guys favorite restaurant? five guys	1	1	1	1	0
SBIC-966	whats the worst part about eating vegetables the wheelchair	1	1	1	1	1
SBIC-967	when she wants to date you but shes ugly and fat	0	1	0	1	0
SBIC-968	when someone uses my last name to introduce or address me, i always feel like i'm in trouble.	0	0	0	0	0
SBIC-969	when ya name gain weight ya ex hoes can't let go	0	0	0	0	1
SBIC-970	why are blacks the most common users of vine ? because it brings them back to when they were swinging on the vines <number> years ago .	1	1	1	1	1
SBIC-971	why did a black man cross the road ? hey ! gimme back my wallet !	1	1	1	0	1
SBIC-972	why did they plant trees in harlem ? for free public transit .	1	1	1	0	1
SBIC-973	why do so many people think teen boys only want sex?	0	0	0	0	0
SBIC-974	why were <number> negros sterilized ? because it was a year between <number> and <number> in north carolina and they were deemed mentally ill or mentally deficient .	0	1	1	1	1
SBIC-975	woman : what were the results from the test ? doctor : there are good news and bad news , the good news is that your child will always find a parking space	1	1	0	1	1
SBIC-976	you ever tell someone your plans and you've kept your mouth shut until now and all of a sudden they get canceled or ruined? BRUJERÍA MIJO	0	0	0	0	0
SBIC-977	you know what the best part about fucking a <number> year old girl is ? . <repeat> lipping her over and pretending she s a <number> year old boy .	0	1	1	0	1
SBIC-978	|| @USER || &#127800;A QUEEN &#127800;slay &#127800;multi-fandom &#127800;selfies on point &#127800;qtie &#127800;ily &#127800;layout always on point &#127800;UR EDITING SKILLS&#128557;&#128175;	0	0	0	0	0
SBIC-979	‼️SENIORS: The big '17' class picture will be taken NEXT WEDNESDAY. Please wear your senior t shirt for the picture!! ‼️	0	0	0	0	0
