# Supplementary material
Source: ML conference proceedings conference paper supplement (https://aclanthology.org/2024.emnlp-main.886)
Supplement: software [file De.xlsx]

## Sheet: Sheet1
tweet_id	text	task1	task2	ID
1133388798925189122	Deutsche rothaarige porno reife deutsche frauen porno. Deutsche politessen pornos porno deutsch inzets. https://t.co/xAag87Y0Jd	NOT	NONE	hasoc_2020_de_2684
1127134592517980161	RT @NDRinfo: Die deutsche Klimaaktivistin Luisa Neubauer wirft Kanzlerin Merkel wegen ihrer fehlenden Unterstützung für den europäischen Kl…	NOT	NONE	hasoc_2020_de_1042
1128897106171842560	@ruhrbahn jeden Morgen eine neue „Fahrzeugstörung“, ihr seid einfach nur zum Kotzen	NOT	NONE	hasoc_2020_de_774
1123576753199484928	@Junge_Freiheit Die Inkas hatten sich schon dämlich angestellt, bei den spanischen Eindringlingen, aber der Deutsche toppt dann doch alles	NOT	NONE	hasoc_2020_de_559
1128743783393312768	RT @technosteron: leute die 'boar' schreiben lassen sich bestimmt auch von ihren analphabetischen Vater in arsch ficken	HOF	PRFN	hasoc_2020_de_1969
1134139256375525376	ich habe mir gerade diese dorne aus meinem arsch gezogen https://t.co/x40mpKgBZN	HOF	PRFN	hasoc_2020_de_2926
1132759271618293761	RT @Schrammi44: Er ist einfach der GOAT @Bouncaay https://t.co/bb9b5SWaKi	NOT	NONE	hasoc_2020_de_2994
1131107693123526657	KFM Deutsche Mittelstand AG: Deutscher Mittelstandsanleihen FONDS zeichnet neue Hörmann-Anleihe mit Mindest-Kupon 4… https://t.co/5HeRedf9cx	NOT	NONE	hasoc_2020_de_1574
1133093570229997573	@mentalshards_ ich will jetzt nicht offenden oder so, ich will einfach nur, das die scheiße weniger wird	HOF	PRFN	hasoc_2020_de_1480
1126898700683501569	RT @SteinbachErika: Einfach skandalös! https://t.co/dC5NXFbviQ	NOT	NONE	hasoc_2020_de_3224
1128386596452085760	"Das geht nicht." "Doch. Zugreifen!" Ach halt doch die Fresse. Scheiß Werbung.	HOF	PRFN	hasoc_2020_de_410
1124322999551840256	@holzraspler @Apple @Botometer Ja Touchbar da kotzen die meisten, unnötig wie sau Xcode: seit 2003 aber egal… https://t.co/BQnklEeDMw	NOT	NONE	hasoc_2020_de_3441
1123489897548001281	XXL weights pack v1.1.1.0 FS19 https://t.co/zTpqTSGujE	NOT	NONE	hasoc_2020_de_1685
1128294539872165889	@Kizer_Media @Zero_Aquila @tagesschau (1) https://t.co/oiwSZhwsPt (2) https://t.co/l12aHaxDIy (3) Agora ist etwas z… https://t.co/kHsKBubRsk	NOT	NONE	hasoc_2020_de_2215
1130919100451106819	deutsche lesben free deutsches ehepaar fickt porno deutscher porno ffentlichkeit free porno muschilecken deutsch https://t.co/GRHmv0F1J9	HOF	PRFN	hasoc_2020_de_3404
1129884743137398784	RT @johannesgrunert: Armselig, peinlich und dumm 👎 #ESC2019 #Iceland https://t.co/sWesovTO9q	HOF	OFFN	hasoc_2020_de_1996
1127236438624473089	@FlorianFOLI 1. Waren es 2 2. Musst du nicht, aber hat halt eh keinen Effekt 3. Ist der Sieg immernoch eher lucky als verdient	NOT	NONE	hasoc_2020_de_3198
1132021174773460992	@joahlen Da ist nichts mehr zu retten. Hirn schon gar nicht. Wo nichts ist, kann nichts werden.	NOT	NONE	hasoc_2020_de_1803
1124358286218649602	süggest movies plz ty :&gt;	NOT	NONE	hasoc_2020_de_2391
1132029215279394818	@EinJanik @MHP2002 Ja ok du arsch	HOF	PRFN	hasoc_2020_de_1228
1131180745324728320	@KONRAD1000 @LVZ Wenn man Ihnen eine Körperverletzung antut, wird man hoffentlich genauso handeln und Täter-Opfer R… https://t.co/cq2bdfZ3ly	HOF	OFFN	hasoc_2020_de_2683
1128638657353650177	RT @maxotte_says: "#Merkel muss weg!" darf bei #Kundgebug in #Wuppertal nicht gerufen werden. Willkommen in der dunklen Zeit! #Repression #…	NOT	NONE	hasoc_2020_de_1618
1125703697332350981	@heuteshow Und linke Journalisten wollen die humanitäre Aufnahme von Flüchtlingen, halt nur nicht in ihrer Wohngege… https://t.co/qr9WNCNZtP	NOT	NONE	hasoc_2020_de_2427
1131536384542629889	@zeitonline was haben die beiden Kopalken nur im Kopf?	NOT	NONE	hasoc_2020_de_1804
1132713729852870661	@tagesschau Die Hasselfeld, Wahlkampfhelferin der Grünen. https://t.co/FLQKHv0jFb	NOT	NONE	hasoc_2020_de_1970
1131482508711874560	Gescher - Christdemokrat möchte, dass Gänse aus dem Naturschutzgebiet Berkeltal verschwinden. Dreck.… https://t.co/b8060gV3hK	NOT	NONE	hasoc_2020_de_776
1133037848913960963	Desnudas xxx gratis, deutsche schwgerin porno! Italiani porno gratis, canal chat gratis. https://t.co/wJWFnVuhVe	HOF	PRFN	hasoc_2020_de_2755
1127483176929116160	@SatireUNfreiesD So ist es, der Islam ist keine Religion des Friedens! https://t.co/NSyjYNJ477	HOF	HATE	hasoc_2020_de_3043
1127626345285136384	@hubertus_zulu @nilzee011 @LinoTobi @dieserRoman Wie dumm kann man eigentlich sein?	NOT	NONE	hasoc_2020_de_2820
1130853572814393345	porno estar gratis unterwrfige deutsche frauen porno mutter fisten sexy mdchen in hotpants https://t.co/FvAKmqCJCu	HOF	PRFN	hasoc_2020_de_759
1123649289463451648	@LianePoost @welt Ich beziehe mich nicht nur auf die DDR. Sozialistische System waren schon immer unproduktiv und w… https://t.co/lrQeZvtXF6	NOT	NONE	hasoc_2020_de_2431
1133836125641105408	@brunipamder237 @Sonnenbebrillt3 @Altonese86 Wir halt einfach immer	NOT	NONE	hasoc_2020_de_3466
1125537229575806976	Ohne scheiss, das is doch einfach unfair	NOT	NONE	hasoc_2020_de_1268
1131886101415759873	RT @yungatakan: niemand: vertrau mir niemand nichtmal merkel: deutsche kinder von afd wählern: https://t.co/EHO9ip8u6z	NOT	NONE	hasoc_2020_de_520
1125064237922045953	RT @Deacon__Blues: Da @TwitterDE anscheinend ein Haufen Idioten sind, die momentan auf Zuruf von afd-Bots Leute wie @RAStadler oder @Sawsan…	NOT	NONE	hasoc_2020_de_2861
1123704385861824512	Ist es nicht Extrem Dumm Zeit für Geld zu verkaufen ? Arbeitskraft/Stundenlohn/ Zeit. Ist es nicht erbärmlich Wisse… https://t.co/rymiIWWH7O	NOT	NONE	hasoc_2020_de_3475
1129724864649150465	#NWBRB58 +++ Ausfall +++ Osnabrück Hbf (ab 13:26) -&gt; Delmenhorst (an 15:24) am 18.05.2019 Grund: Fahrzeugstörung… https://t.co/0yqkl1fESN	NOT	NONE	hasoc_2020_de_1920
1131183823948013569	@JoergRMayer @lichtmesz Wirst schon noch deinen Versorgungsposten bekommen. So wie jeder hartnäckige Karrierist. Ab… https://t.co/UsQERWQxXm	NOT	NONE	hasoc_2020_de_474
1127239156508311557	@Hartes_Geld #Nazis waren schon immer #Linke, halt miese #Sozialisten - wie die #Antifanten der #kriminellen #Antifa.	HOF	HATE	hasoc_2020_de_548
1128056961906413568	RT @451_grad: #Benziner dreckiger als #Diesel? Für @Die_Gruenen schon, aber stimmt das auch? 🤷‍ 📍 Noch mehr dazu: https://t.co/NSfD2FOCqd 📍…	NOT	NONE	hasoc_2020_de_3163
1128589927934042112	@xRxss_ Ich hab halt überall Wireless Charging Pads, wär sau dumm. 😅	NOT	NONE	hasoc_2020_de_2813
1133741065901608961	RT @Katerfrieden: Ich bin dafür dass die Grünen das Geschoß ertragen. https://t.co/E8azul8WmQ	NOT	NONE	hasoc_2020_de_1035
1130112447690530816	RT @braindead_xy: @tagesschau Deutsche Regierung stürzt ausländische Regierung. Und feiert das! Ihr Deutschen (87%) kotzt mich so an! Ihr…	HOF	HATE	hasoc_2020_de_2368
1134362607249448960	@johannesw82 @bellefired @VollzeitJonas 🤦‍♂️wie kann man nur so dumm sein 😂🤣	NOT	NONE	hasoc_2020_de_3140
1128223819708162049	*hier nach belieben auch Politik(er) einfügen.	NOT	NONE	hasoc_2020_de_2663
1129130045224685572	Schlagabtausch im ZDF..... regierungsgesteuerte SCHEISSE mit dementsprechendem Publikum vor Ort!!!!!!!!!!	HOF	OFFN	hasoc_2020_de_1266
1123557279037644801	ich verleih nie wieder mein scheiß crusher	HOF	PRFN	hasoc_2020_de_874
1131663094458003456	RT @neomagazin: Deutsche Carpool Karaoke #DoTheyKnowItsEurope https://t.co/JENTkGq11j	NOT	NONE	hasoc_2020_de_1344
1131180690777751552	WELT: Horst Seehofer kündigt kriminellen Clans den Kampf an WELT: Horst Seehofer kündigt kriminellen Clans den Kamp… https://t.co/RT1oMHEGvq	NOT	NONE	hasoc_2020_de_1282
1125641143490895872	RT @Das_KGB: Zum kotzen https://t.co/LGsgiE4Jjb	NOT	NONE	hasoc_2020_de_2590
1131966011295584256	RT @Hihi97948034: Mero ist ein Hurensohn	HOF	PRFN	hasoc_2020_de_2658
1133326932911808512	Wenn du schon seit knapp 10 Monaten mit einem Kollegen zusammen arbeitest, nie ein Wort Deutsch mit ihm sprachst, w… https://t.co/94SZrnqotc	NOT	NONE	hasoc_2020_de_1062
1128699319576612864	@domi_twr Einfach kein assi sein der im kreisel nicht blinkt. Und auf der autobahn wäre blinken auch vorteilhaft	NOT	NONE	hasoc_2020_de_2822
1125431663163531264	hab glaube echt gerade den größten hurensohn busfahrer deutschlands	HOF	OFFN	hasoc_2020_de_1305
1125778708260896770	RT @tagesschau: EVP-Spitzenkandidat Weber will Europa einen https://t.co/ooAUUBLZTj #Europawahl2019 #Weber #Wahlarena	NOT	NONE	hasoc_2020_de_1254
1124427395782643712	Warum haben linke Politiker eigentlich kaum ein richtiges Berufsleben?	NOT	NONE	hasoc_2020_de_94
1131875879913742337	Aaaain gabriel ❤️😍	NOT	NONE	hasoc_2020_de_2946
1129105403709743104	hört sich an wie Hintergrundmusik für Mobilfunkwerbung #escorf	NOT	NONE	hasoc_2020_de_1384
1126030790100434944	@Der_OG_Julius ist der echt mit der zusammen	NOT	NONE	hasoc_2020_de_944
1132576718722617344	RT @TopTomCH: Aufruf zum ficken! Da Er @MichaelHaenel3 seit über 3 Monaten keinen echten Schwanz mehr im Arsch hatte wird eine geiler Top…	HOF	PRFN	hasoc_2020_de_336
1130882173794496512	Damit wir vor #Scheisse bewahrt werden: #FusionBleibt !! https://t.co/0mLIf78Gms	HOF	PRFN	hasoc_2020_de_2289
1132919389169291265	@go73729092 @Ralf_Stegner Machen doch alle privaten Medien so!	NOT	NONE	hasoc_2020_de_1916
1134044712552357888	@xmerve021 ja ist halt echt	NOT	NONE	hasoc_2020_de_923
1125980915635773440	RT @Jesus_folgen: @HaraldBecker80 Als Gegenbeispiel gibt es ein Video, in dem gezeigt wird, wie die DEUTSCHE BUNDESKANZLERIN NAMENS MERKEL…	NOT	NONE	hasoc_2020_de_260
1126848356435865600	900.000 deutsche „Flüchtlinge“ im EU-Ausland https://t.co/8RsEOvFFY0	NOT	NONE	hasoc_2020_de_1943
1125744075880136704	ALERTE Ruche4 Poids=10.2kg -&gt;https://t.co/WTpfLC1Afv … Infos-&gt;https://t.co/nzwsT5HGPr (14:47:56) https://t.co/gjZnuXZoSy	NOT	NONE	hasoc_2020_de_154
1132456476415541248	@GG_SSBM was soll dieser scheiß man	NOT	NONE	hasoc_2020_de_3088
1131482424809054208	RT @BB12_DE: @krippmarie @KunkelMuhme Die linken Schlägertrupps sind wieder in Deutschland unterwegs. 🙄 #unserwir https://t.co/mhkvN554er	NOT	NONE	hasoc_2020_de_217
1124999989590147075	RT @Atomreisfleisch: @jacky_lope Und man hört diese ganzen Elektro-Dinger nicht. Ich stelle mich schon heute auf das Geheule ein, wenn Leut…	NOT	NONE	hasoc_2020_de_2137
1133839673988718592	* rachsüchtige Frauen. Es gibt hasserfüllte Frauen, Frauen die betrügen und lügen. Hört auf eure Mysogynie hinte… https://t.co/k2mvmkkVsC	NOT	NONE	hasoc_2020_de_1965
1132931582032076800	die arroganz der leute aus den westlichen bundesländern ist so ekelhaft und abstoßend, ich könnt kotzen wie kann m… https://t.co/uXdFuejOZB	HOF	HATE	hasoc_2020_de_1886
1124444323997716480	@Pokehita97 Hey sorry das ich so overreacted habe!! (kenn das deutsche wort für overreact nicht sry😅) CAN U PLS FOR… https://t.co/nLPmQIhVCW	NOT	NONE	hasoc_2020_de_1962
1125147385791942656	RT @burger_ein: Radikale Moslems und nationalistische Türken Die verschwiegenenen Wähler der Grünen https://t.co/u7Jj38Ldc1	HOF	HATE	hasoc_2020_de_2217
1134550809855844352	@Obi_Jan_Kenobii @walkerjole Die haben sich mit der Zeit schon selbst entsorgt.	NOT	NONE	hasoc_2020_de_762
1124388900464676864	Siege &gt; CoD	NOT	NONE	hasoc_2020_de_227
1133480201197948929	RT @RolandTichy: Keiner redet vom Wetter, nur wir: Die Grünen sitzen jetzt ihrerseits in der Klimafalle: Radiale Maßnahmen sind hübsche For…	NOT	NONE	hasoc_2020_de_59
1130111608838139907	@MartinaHolst @rudolfuz Politiker kriegen bestimmt wieder Extrarechte	NOT	NONE	hasoc_2020_de_2573
1124744715868549121	Die Bigotterie von Grünen ist kaum aushaltbar. FCK NAZIS auf den Plakaten aber neben ihnen Stehen und Flyer verteil… https://t.co/D2SoJv7zU0	NOT	NONE	hasoc_2020_de_980
1130096303801872384	@STARGAMESTV69 @verankernLUL @Papaplatte @tim0cy arsch https://t.co/ezeiGmpJAb	NOT	NONE	hasoc_2020_de_792
1131161308911398913	EINFACH NUR AUS ZEITVERTREIB	NOT	NONE	hasoc_2020_de_1069
1133436311979868161	@Tlaytweet hilfe diese frau was befindet sich in ihrem kopf an der stelle, wo normale menschen ein hirn haben?	HOF	OFFN	hasoc_2020_de_2052
1124546006505357312	RT @PeterZobel4: @ZDFheute "Keine Zusammenarbeit mit rechten Parteien". Also gehört Merkel einer linken Partei an? Oder was soll das heißen?	NOT	NONE	hasoc_2020_de_3433
1129294617134784514	Gutschein "-50% REBELITA Fleecepulover für Frauen!" https://t.co/EC0VX6LWYj	NOT	NONE	hasoc_2020_de_1435
1129510569256587264	#Hofheim Hobbyhure-sucht-Taschengeld: Anna zarte St*te - Zarte, deutsche St*te will d... https://t.co/z5s5n4K9fl https://t.co/FJqJxBuyIS	HOF	PRFN	hasoc_2020_de_2513
1132621144824139776	„Die Wähler sind halt zu dumm, sodass wir ihnen unsere Positionen nicht vermitteln konnten. Diese Verachtung für si… https://t.co/rMolA6HBKi	HOF	HATE	hasoc_2020_de_862
1125732050818994176	benutze dein Gehirn! Niemand hat mich bezahlt :( #EducaAunFifi	NOT	NONE	hasoc_2020_de_682
1124636523788406784	RT @Ulrik_von: @spdberlin @gabischoff @RaedSalehBerlin Das neue Logo ist auch schon fertig. https://t.co/BZeIk9yBzf	NOT	NONE	hasoc_2020_de_2005
1132616921155743745	@RainerWinklerDE Lieben Heteros, jetz habter richtig Scheiße am Arsch, etzala fliegt ihr raus.	NOT	NONE	hasoc_2020_de_1763
1134560620349706240	@Piratenpartei Was soll dieses Gequatsche von Nazis? Wer gegen ILLEGALE Migration und linken Gesinnungsterror ist,… https://t.co/FRLCTDCZoE	NOT	NONE	hasoc_2020_de_3104
1134399169010065408	@nicerlucas Scheiß alki	HOF	PRFN	hasoc_2020_de_2162
1128376953747247105	@DanyVause Deutsche Kultur https://t.co/nUdQfuCLsc	NOT	NONE	hasoc_2020_de_2690
1128709427824136192	@maynstream Bin halt aber schon tip-top motivator https://t.co/AvRaWLUEMI	NOT	NONE	hasoc_2020_de_380
1128390300026789888	ich hasse meine eltern ohne spass diese dummen hurensohne ich bin fucking 14 und die heulen rum wenn ich EINE fuxki… https://t.co/ARddcXxbDn	HOF	PRFN	hasoc_2020_de_1320
1127530950055874561	scheiß bauchschmerzen	NOT	NONE	hasoc_2020_de_2707
1132663154943700997	@DrThomasBruns @VonSchwer Wer tritt denn heute von den dt. Politikern noch zurück? Demnach hätte Merkel schon vor J… https://t.co/rRzVlfdkMK	NOT	NONE	hasoc_2020_de_2890
1132690636027641857	RT @ZDFheute: Wer wählte die Grünen bei der #Europawahl2019? https://t.co/bDmYsTVuTf	NOT	NONE	hasoc_2020_de_2065
1125638278768680960	@tukyabitch lass linken	NOT	NONE	hasoc_2020_de_870
1127788065081188352	Merkel hat Deutschland abgehakt. Es interessiert sie einfach nicht mehr. Sie reist ein bisschen durch die Welt und… https://t.co/ofrWEtyVKP	NOT	NONE	hasoc_2020_de_3504
1128675315574870016	Alkohol und Schwangerschaft: Noch nicht geboren – schon betrunken https://t.co/mEMT2egFpC	NOT	NONE	hasoc_2020_de_2792
1134102967248965633	RT @____Firefox___: Der Kern der #Grünen Pädo und Nekrosex Sekte. Was ist das doch für ein widerliches Geschmeiß Die Grünen müssen weg h…	HOF	PRFN	hasoc_2020_de_95
1127310656829624323	RT @Zar2001doz: @tagesschau Trump war im Dezember in Deutschland, ohne Merkel und Maas überhaupt bescheid zu geben. Jetzt versetzt Pompeo d…	NOT	NONE	hasoc_2020_de_664
1129060973451644929	Kölner Stadt-Anzeiger: Martin Schulz wirft Merkel Untätigkeit für Europa vor – "Skandal, dass sie am Euro https://t.co/ARMwSBbkGH	NOT	NONE	hasoc_2020_de_1882
1125010013955788800	RT @Glockto: Wenn ich Blumenkohl zubereite, muss ich immer vorstellen, dass ich ein Gehirn seziere. "Und das, werte Kolleginnen und Kolleg…	NOT	NONE	hasoc_2020_de_883
1124770884101787648	RT @zuckerbienchen_: Bin kurz vor den 2.222 Followern! Ein paar von euch können sich jetzt schon mal ausziehen und mir dann ihre Nudes sch…	NOT	NONE	hasoc_2020_de_1057
1126070753466753024	„Schlimmer geht es nicht“ – Adidas-Chef Rorsted rechnet mit Bundeskanzlerin Merkel ab https://t.co/QsBE9yAeXY via @DrDavidBerger	NOT	NONE	hasoc_2020_de_3048
1127597685618499586	@untenistoben Unfassbar. Merkel muss weg!	NOT	NONE	hasoc_2020_de_3486
1130015697675935745	@ZDFheute @wulfschmiese Ach, und mit Leuten wie Maas und Merkel, die uns vorgelogen haben, der unheilvolle… https://t.co/M4pnSEFeHF	NOT	NONE	hasoc_2020_de_12
1132379947161587713	@milkiriveri Beißt Dir den Kopf ab	NOT	NONE	hasoc_2020_de_2980
1129871543637557248	RT @tabeayy: meine tante schickt das einfach in die familiengruppe und i- https://t.co/NFpw13DNHU	NOT	NONE	hasoc_2020_de_374
1128426127754711041	RT @SpiegelAnti: Warum die Europäer Vasallen der USA sind und wie von dieser Tatsache abgelenkt wird https://t.co/t02eVtMCZf	NOT	NONE	hasoc_2020_de_2188
1127905694341058561	macht mich schon wieder absolut sad dass ich nichts kann	NOT	NONE	hasoc_2020_de_2383
1125499250186555398	Achja Deutsche und ihr Heldenmythos😒 https://t.co/JiCFjakW4W	NOT	NONE	hasoc_2020_de_2286
1128625701152788482	@WELTnews Don alphonso? Echt jetzt? Der komische neue-Rechte, der nie Ahnung hat?	NOT	NONE	hasoc_2020_de_2306
1129705843488886784	@vanHimbeeren @tagesschau Wenn ich ihr Gesicht sehe muss ich auch brechen! 😁	NOT	NONE	hasoc_2020_de_2826
1128139228989337601	RT @AliceWo18626168: Merkel spalterische Eurorettungspolitik entpuppt sich als fiskalisches Fiasko un Täuschungskonstrukt https://t.co/FDHX…	NOT	NONE	hasoc_2020_de_210
1129681206122078208	@tagesschau Mir doch Scheißegal	NOT	NONE	hasoc_2020_de_1043
1128393147975905280	Und noch eine Luftblase: Merkel strebt Klimaneutralität bis 2050 an https://t.co/kDlqUZcdo1	NOT	NONE	hasoc_2020_de_362
1125805627291439105	@Tulpa2230 @ZDFheute @PeterToitberg @ArminWolf Die Arroganz der Linken schadet nicht nur dem politischen Diskurs so… https://t.co/5EElap5LXN	HOF	HATE	hasoc_2020_de_389
1124639967291039745	@schwartz_ht @internetbazi @KulierJarolina Ist Dein bester Freund auch so 1 Hurensohn wie der Bazi?	HOF	OFFN	hasoc_2020_de_1245
1124617385175134208	@Golzheimer Das ist das Resultat Merkel Deutschland Europa Welt Politik/Merkel kassierte Milliarden für Aufbau der… https://t.co/q2smFXJmoE	NOT	NONE	hasoc_2020_de_768
1127101524608454657	Kennst du schon „Ryan Riback - Kinder Eyes (HoshiMusikDesign)“ von HoshiMusikDesign auf #SoundCloud? #np https://t.co/sTtTrCgBFZ	NOT	NONE	hasoc_2020_de_2847
1133891209414549505	Neueste Videos : 30.05.2019 von KikiVega -&gt; Krasse Aktion. Von der Strasse direkt in den ARSCH !! https://t.co/bzbpPlIsgw	HOF	PRFN	hasoc_2020_de_171
1133744543013265408	RT @heuteshow: Einfach weiter lächeln. #AKK #Merkel https://t.co/8dTW0WHlnI	NOT	NONE	hasoc_2020_de_111
1133574749177679872	Deutsche hobby pornos, deutsche junge schlampen porno. Teens ficken hd frauen ficken sich. https://t.co/QCWxAen3tA	HOF	PRFN	hasoc_2020_de_2467
1129469322466910209	Dir würde ich jetzt gerne in deinen geilen Arsch ficken und dir das Arschloch voll spritzen. Geile Sau… https://t.co/h0as0ch4s8	HOF	PRFN	hasoc_2020_de_3126
1125357876942446592	@realverlust Kotzen muss ich so oder so 😂	NOT	NONE	hasoc_2020_de_2546
1125681958254673927	@SchwesterFD Einfach nur ❤❤❤	NOT	NONE	hasoc_2020_de_2255
1134524796786679808	@Dieter_Grind Da brauchts nicht mal was staatlich organisiertes. Die Leute sind so im Kopf gfickt, die schaffens selbst	HOF	PRFN	hasoc_2020_de_2702
1126772867339673600	@KNA_Redaktion @bodoramelow Hmm, ab 1933 unterstützte die Kirche ja auch die Nazis! 🤷🏼‍♀️	NOT	NONE	hasoc_2020_de_2003
1134196022052368384	@Karl_Lauterbach Du Super Spinner! Ihr seit doch die Mietpreis Wucherer mit Eurem Styropor " das Pack" Gabriel. Verlogene Scheiss Partei	HOF	HATE	hasoc_2020_de_3465
1133089841481232385	RT @434Italo: Niemand in Europa redet vom Klimaschutz. Nur in eurer kleinen, deutsch-chauvinistischen Welt, die ihr euch eingerichtet habt,…	NOT	NONE	hasoc_2020_de_2022
1127995167217262592	@sailorvicious_ DAS DOCH FRÜHER! :&gt;	NOT	NONE	hasoc_2020_de_2332
1127299491583991809	@jusederjude kinder sind halt dumm wie scheiße schade	HOF	HATE	hasoc_2020_de_2675
1125705874180399104	RT @tagesschau: Auf 11 Quadratmetern mit einer vierköpfigen Familie: Junge Wohnkonzepte in Europa. Unsere neue Serie #Club28 zeigt Probleme…	NOT	NONE	hasoc_2020_de_20
1128219658971176960	@bernd471 @Silke1974geb @Mrchentante1 Die Linken und Grünen scheinbar doch!	NOT	NONE	hasoc_2020_de_1040
1125450592061665282	@Sudelheft Was für ein dummes widerliches Arschloch	HOF	PRFN	hasoc_2020_de_3310
1127968445323198464	Merkel hat doch fast alles erreicht!Den Rest Deutschland schafft sie auch noch!Macht alle weiter so und denkt das s… https://t.co/vjHZSOALty	HOF	OFFN	hasoc_2020_de_951
1133263997405474816	Extension: Daniel Mitchell (F) | Telford Tigers -&gt; Telford Tigers | https://t.co/nkx2RGNWVN #NIHL	NOT	NONE	hasoc_2020_de_2388
1128290915976712194	RT @Ricarda_Lang: Konservative: Die Linken machen nur noch Identitätspolitik und sind deshalb Schuld am Rechtsruck. Linke: Lasst mal über…	NOT	NONE	hasoc_2020_de_3339
1134553221568110592	RT @schautnichtweg: @LoveGuerillos @thorser62 @luciamertins @kmw2904 Ich pack’s langsam nicht mehr 🙈😅🤩 https://t.co/VtR6VnY7LL	NOT	NONE	hasoc_2020_de_2184
1131616638342782976	Merkel Doktorarbeit: Ein Fake? | MMnews https://t.co/nmHgVfK0IA	NOT	NONE	hasoc_2020_de_2579
1134560322528907265	@citylayer Ich packs eh überhaupt nicht, dass es hier schon so weit ist. Anscheinend taugt die neue Balkonlage echt was. 😂	NOT	NONE	hasoc_2020_de_491
1129793496045502464	@coffeiniker Oder der Aluhut zu fest auf dem Kopf sitzt und das restliche Hirn zerquetscht	NOT	NONE	hasoc_2020_de_2973
1126077124576722945	@Enrico95151143 @welt Schon "irritierend" dass hinter Herrn Kühnert nicht nur der DIW-Präsident Fratzscher sondern… https://t.co/YKvE1icEOW	NOT	NONE	hasoc_2020_de_440
1124486669690912768	pass that Deutsche	NOT	NONE	hasoc_2020_de_1735
1131060528158257152	RT @_Adora_Belle_: Politiker so: "Die Jugend ist so unpolitisch!" #Rezo so: *beschäftigt sich mit Politik* Politiker so: "Mimimi, #fakenew…	NOT	NONE	hasoc_2020_de_1911
1134117936703135744	Zurück ins Jugendzimmer https://t.co/PRUP8CoQDH	NOT	NONE	hasoc_2020_de_2434
1128535116781891585	RT @VQuaschning: #Merkel will Klimaneutralität bis 2050. Reicht nicht für Paris. Mit aktueller Politik wirds auch nichts vor 2200. Merkel i…	NOT	NONE	hasoc_2020_de_384
1124792304433287168	Gabriel morreu	NOT	NONE	hasoc_2020_de_1644
1125139898971971587	@ThorsMetkeller Bestell dir halt früher was DansGame	NOT	NONE	hasoc_2020_de_2376
1131104706774880257	Juristen die nichts können werden Politiker vom Kaliber Maas!	NOT	NONE	hasoc_2020_de_1730
1129647102232023040	@YohBuh @ZeeLikeZorro @MOOOrizzle Scheiß Nazi!!!!!	HOF	OFFN	hasoc_2020_de_750
1131583708861992961	RT @Craftergut5: @CDU Das ist eure Politik Merkel und sie der Verbrecher Macron. https://t.co/erTdrUYp19	HOF	OFFN	hasoc_2020_de_49
1132192612763488256	KEIN WUNDER !!! Diese NAZIS wollten/wollen ÖSTERREICH PUTSCHEN !!! KEINE MACHT diesen NAZIS !!! #HCSmussWeg… https://t.co/tBdl3Nn8Io	NOT	NONE	hasoc_2020_de_1102
1128193356478152705	RT @alextv: Gibt es eigentlich Puffs für Frauen? 🤔	NOT	NONE	hasoc_2020_de_602
1133367865116168192	Das linke Wahldesaster in Europa Strömungsübergreifend haben linke Parteien bei der EU-Wahlen verloren. Ein nachha… https://t.co/BuBI5szpRx	NOT	NONE	hasoc_2020_de_164
1124830652942245889	@BILD Sie meisten Grünen sind Alkoholiker.	HOF	HATE	hasoc_2020_de_2336
1125744604370829312	RT @chil_ro: Es gibt immer dieses "nur mal kurz" ARSCHLOCH! https://t.co/SZGCAiHsqc	HOF	PRFN	hasoc_2020_de_1121
1128194199533256704	Freiheizstatue: RT AchimSpiegel: Bei Euch LINKEN gäbe es gar nichts, außer Zerfall, Armut und Unterdrückung.… https://t.co/Q9C1DUmSye	NOT	NONE	hasoc_2020_de_2062
1131578390513893381	RT @Grottekbrutal: Deutsche Traumurlaub https://t.co/5xAiARXiCe	NOT	NONE	hasoc_2020_de_1226
1125326851696623617	RT @BytePirat: Es ist eine Schande! Es gibt tausende bedürftige Kinder und Familien. Warum kann man diese Lebensmittel nicht verschenken? h…	NOT	NONE	hasoc_2020_de_3467
1123504611158106112	RT @PParzival: #Aufstehen gegen pseudolinken Grüne Die vormalige grüne Friedenspartei hat sich zur schrillsten Kriegspartei gemausert, die…	NOT	NONE	hasoc_2020_de_300
1125846572078649344	Der Doktor hat ein Herz. Das ist NICHT dumm! #HomeForWhovians	NOT	NONE	hasoc_2020_de_1767
1134521730729500672	@weilkp1 da stimmt einfach alles vallah	NOT	NONE	hasoc_2020_de_2501
1125080683775447040	@frauE_ausB Du leckst den ab????🙄	NOT	NONE	hasoc_2020_de_1020
1128585066723069953	@faznet Nun die USA machen doch nur was Merkel selbst fordert. https://t.co/BRS9z1Yuz5	NOT	NONE	hasoc_2020_de_632
1127303581038780416	@RandyRaudi @tagesschau Was hat das mit dem Islam zu tun? Alle Religionen gehören zum Teufel, um es mit ihrem Wort zu sagen	NOT	NONE	hasoc_2020_de_1584
1133395895662383104	Was machen eigentlich die Linken und ihre symphatische Vorzeigekandidatin , weiss man da was ?	NOT	NONE	hasoc_2020_de_1500
1132981922043441152	Was die #erstwähler noch erfahren werden ist, dass ein Kreux bei den Grünen nicht das Klima rettet,,weil Grüne v… https://t.co/rggHOvByzO	NOT	NONE	hasoc_2020_de_1631
1123851522046140416	Hitler macht kein Deutschrap 6:1 hitler	NOT	NONE	hasoc_2020_de_137
1132623044818739201	@lukasinho01 Ist irgendwie blöde, AFD ist scheiße aber auch die scheinheilige Linke und CO. Wenn man sich mal richt… https://t.co/RZRn2hYYC7	HOF	OFFN	hasoc_2020_de_757
1131103767263436800	RT @mozart2018: #EUWahl Stoppt endlich Merkels jahrelange #Massen-und #Verbrecherinvasion sie zerstört Deutschland wählt #AFD https://t.c…	HOF	OFFN	hasoc_2020_de_120
1130836225164812288	Wussten Sie, dass das Wort “Mülldeponie” eigentlich schon zu den veralteten Wörtern in Deutschland zählen müsste? W… https://t.co/dtQBDL6B9C	NOT	NONE	hasoc_2020_de_1696
1133061752227287040	@AljaseAs Puh. Was für kollossale Scheisse einfach. (Kann das nicht faven. ☹️)	HOF	PRFN	hasoc_2020_de_139
1124589283346501632	Die deutschen Politiker sind den Islamisten ausgeliefert, Punkt	NOT	NONE	hasoc_2020_de_921
1126179859884126208	Ein Rapper, der in seinen Texten hauptsächlich misogyne scheiße von sich gibt und sich als misogynes Arschloch insz… https://t.co/EyqH4V6yKK	HOF	PRFN	hasoc_2020_de_852
1125840607790927872	deutsche xxxtentacion https://t.co/BNE5k3hVw3	NOT	NONE	hasoc_2020_de_408
1125146232387719168	RT @ulrichham: @Karl_Lauterbach Wir hatten schon mal rot grün .Abgezockt habt ihr uns .Belogen und betrogen .H4 , Altersarmut ,Leiharbeit,…	HOF	HATE	hasoc_2020_de_2045
1133660187150159873	RT @_TheTrveVarg_: Deutschland wird in der Bedeutungslosigkeit verschwinden. Eine Schande, wenn man bedenkt, was Deutsche der Welt einst hi…	NOT	NONE	hasoc_2020_de_1457
1134019173435301888	Wie viele dumme Menschen es doch gibt... Und sie merken noch nicht mal, wie dämlich sie sind. Sie denken total besc… https://t.co/evnrJebcdu	HOF	HATE	hasoc_2020_de_2883
1127836463163412480	RT @SonjadelaRosa7: @Eddie_1412 @DarkCat90 @zeitonline Verdammt, die Grünen kommen nicht ins Himmelsreich, weil sie Vielflieger sind?! 🤣	NOT	NONE	hasoc_2020_de_1662
1130781674084737024	RT @tagesschau: Stiftung Warentest: Tropenholz in Grillkohle https://t.co/iWgoLmpTu4 #Grillen #Grillkohle	NOT	NONE	hasoc_2020_de_2105
1126956875684229120	@steak_staub6760 Hört sich nach aua an	NOT	NONE	hasoc_2020_de_483
1129942737766223872	RT @depositodetiras: por charles schulz https://t.co/KZHHK9XMhF	NOT	NONE	hasoc_2020_de_2887
1133444432152469505	@FrauWeh Wart ab, die Bogenschützen dezimieren die Prinzen und dann stimmt es wieder ;-)	NOT	NONE	hasoc_2020_de_58
1132345503549722626	@GurkenplaysYT @ChrisFCN1900 Was ein hurensohn und dann lacht der noch so dreckig...	HOF	PRFN	hasoc_2020_de_124
1133127095289294849	@BeateHaubrock @mokomokai @KJPGehrden #IdentifikationmitdemAggressor? Oder einfach Dummheit?	NOT	NONE	hasoc_2020_de_1307
1125766817396547590	RT @samelou: Das seltsame an der Zensur dieses Satzes: er ist einfach nur ein Fakt. Es ist keine Beleidigung, keine Verleumdung, keine entw…	NOT	NONE	hasoc_2020_de_3482
1129070117009199106	RT @oklara: Nazis sind Nazis, weil sie Nazis sein wollen.	NOT	NONE	hasoc_2020_de_1707
1134481469634727937	Real pornos deutsch, reality kings gratis. Frauen vogeln milf arsch https://t.co/kmtGI7MbtE	HOF	PRFN	hasoc_2020_de_1380
1133314178045947904	Was geschieht, wenn deutsche Familien #Austauschschüler aufnehmen: mal die übliche Teenager-Mühsal, mal Sitcom, mal… https://t.co/bPIwteQK4v	NOT	NONE	hasoc_2020_de_583
1131380129958170624	RT @TemmuzKacak: Deutsche Medien sind schon komisch: TerrorPKK in #Deutschland Gestern: #Pkk = Freiheitskämpfer Jetzt: Pkk = Irakische Ro…	NOT	NONE	hasoc_2020_de_173
1127573358676193280	@AfDBerlin Burka für Merkel! https://t.co/n4Xrey3s8s	NOT	NONE	hasoc_2020_de_2143
1129244189005373441	Und ich werde NURNOCH in meinem Zimmer sitzen und ich werde hier bis ich ausziehe KEIN Gramm essen zu mir nehmen !!	NOT	NONE	hasoc_2020_de_2515
1128229574318407680	@BoserEr @SebastianHampel @DrDavidBerger Was ist den mit den Gängster Rap. Unsere Kinder verblöden,wenn sie die Cha… https://t.co/XVfdR9gove	NOT	NONE	hasoc_2020_de_2811
1127159733167775744	Für mich schon DAS BUCHZITAT des Tages: "Immer musste man dort hinter irgendeinem Idioten in der Schlange stehen,… https://t.co/bL1hZeYyep	NOT	NONE	hasoc_2020_de_2384
1130185457965387782	@ghostikun sexistische kackscheisse einfach nur	HOF	PRFN	hasoc_2020_de_2799
1127159347291873281	@Krise_K @BrabaxBln @s_ill_e @Zitronenjette20 @Morgaine620 @dgh_de Auch das Treppenhaus ist dann sehr einfach zu re… https://t.co/EHnW43wide	NOT	NONE	hasoc_2020_de_2782
1132985743054393346	liebs, wie er beim Wahlomat auch bei den grünen am meisten Prozent hatte, aber bestimmt irgendeinen anderen scheiß… https://t.co/l55CAQLg2F	HOF	PRFN	hasoc_2020_de_1097
1124688268900147206	RT @burger_ein: Bewährungsstrafe für Schwarzafrikanischen Asyltouristen der eine junge Deutsche auf Kirchentreppe vergewaltigt hat https:/…	NOT	NONE	hasoc_2020_de_903
1132651163428499461	Hure mit milch lesbensexvideos kostenlos. Blonde deutsche schlampe, deutsche schwiegermtter gratis porno. https://t.co/iW5W99oAJM	HOF	PRFN	hasoc_2020_de_1823
1134539799807893509	@chris_98763 @zeitonline dummheit volltreffer	NOT	NONE	hasoc_2020_de_3079
1134093739767607296	RT @schmid_claudio: Es ist mir ein Rätsel wozu es überhaupt noch Wirtschaftsverbände gibt. Tatenlos sehen sie zu, wie eine grüne Bande den…	NOT	NONE	hasoc_2020_de_497
1132041026405687296	RT @DaddyAtze: So that was fun 😜💦💦💦🤘 Einfach goil, dieser Arsch 🤘😜 https://t.co/O1qiWZis6U	HOF	PRFN	hasoc_2020_de_289
1126057663031390208	@cookiesforjoon fandest du es auch so scheiße wie ich?	HOF	PRFN	hasoc_2020_de_2387
1132647476639522816	Sind blaue Haare das neue blond oder warum wird @rezomusik, um es doof zu sagen, für dumm erklärt?	NOT	NONE	hasoc_2020_de_2127
1127290717083185153	@Skototaxis Damals, als es linke Journalisten waren, die sich so trafen.	NOT	NONE	hasoc_2020_de_1124
1134510267700785153	Reifen frauen com, fette haarige frauen. Ficken junge frauen deutscher wrge fetisch porno https://t.co/bvgPauANmS	HOF	PRFN	hasoc_2020_de_1722
1128225824572944384	Samsung DA29-00020B, HAF-CIN/EXP Premium Refrigerator Water Filter (White, 2 pack) https://t.co/IgevEPEmUG… https://t.co/fjNWdORenQ	NOT	NONE	hasoc_2020_de_2244
1129083811415887872	@aufklaerer2017 Der #Aufschrei gewesen, wenn er einen #linken über die Brüstung gehoben hätte 😎	NOT	NONE	hasoc_2020_de_293
1128609179780960256	#NWBRE14 Borken (Westf.) (ab 16:31) -&gt; Essen Hbf (an 17:29) am 15.05.2019 +++ Teilausfall +++ von Dorsten (ab 16:5… https://t.co/DQFghhRD1L	NOT	NONE	hasoc_2020_de_1309
1125106994657021952	@tagesschau Allen ein fröhliches Allahu Akbert.	NOT	NONE	hasoc_2020_de_914
1125800262772449280	wennst nicht zuhörst und SIE dich gegen die wand choked💖💖	NOT	NONE	hasoc_2020_de_1239
1126074855462506496	Hurensohn wer nicht für mich stimmt	HOF	PRFN	hasoc_2020_de_793
1132921989654560769	@ZDFheute @sven_giegold Rot-Grün zusammen haben 1,7% verloren.	NOT	NONE	hasoc_2020_de_2134
1123532989814726657	was zur hölle ist in dem veganem dings von mecces dringe warum sieht der scheiß genau so aus wie deren ranziges rindfleisch	HOF	PRFN	hasoc_2020_de_868
1131988798965997568	Hurensohn wer Videoaufrufe kaufende hurensöhne hört	HOF	PRFN	hasoc_2020_de_3462
1132455897601597440	RT @TopTomCH: FF Nicht für jeden Arsch - Fistplay 😜😜😜 #gay #ass #assplay #ff #fistingtime #fisting #xyz © @TopTomCH https://t.co/O7YF0ZgA…	HOF	PRFN	hasoc_2020_de_3240
1129811523143184396	RT @BoserEr: Causa Strache: Ein Konservativer schießt einen Bock und tritt zurück. Linke tricksen, betrügen, versagen und brechen geltendes…	NOT	NONE	hasoc_2020_de_266
1132345960733007872	mdchen naked extrem behaarte muschis a deutsche porno deutsche transnutte porno clip https://t.co/dCh4j9R8JK	HOF	PRFN	hasoc_2020_de_386
1127530429949644802	@SPIEGEL_alles Habt Ihr da nicht was verwechseln ist es nicht die SPD die mit dem Islam den Roten Teppich aus legt… https://t.co/foCSZRIccb	NOT	NONE	hasoc_2020_de_3474
1132343762892578816	Kurz schreckt echt vor nix zurück. #EUWahl19	NOT	NONE	hasoc_2020_de_2462
1131177826084900870	@cubcgn1 @Davidhf92 Den arsch würde ich gerne einmal verwöhnen	HOF	PRFN	hasoc_2020_de_3274
1132337236572278784	RT @narrhallamarsch: scheiß auf Spargel, Erbeeren for President!	NOT	NONE	hasoc_2020_de_3024
1133455249249853440	RT @el_ramberto: @hururensooohn okok stopp nein abort mission da ist n faltiger arsch voll mit ausschlag	HOF	PRFN	hasoc_2020_de_3013
1130044177021054977	@realAntiZion77 @nettilatte @AkifPirincci @HCStracheFP Halt deine fresse du anonymer nicht mal seine fresse zeigender Bonner stricher	HOF	OFFN	hasoc_2020_de_278
1131572833065340928	@PillePa47127736 @rezomusik Ich wollte nur zeigen, dass meine Tweets einen Scheiß zur Umweltbelastung beiträgt. Und… https://t.co/NXyPAdCIBE	NOT	NONE	hasoc_2020_de_2657
1129146868582289411	Trends der Grünen Branche auf der Spoga+Gafa https://t.co/3NOVZpn6vf	NOT	NONE	hasoc_2020_de_3133
1130213584947109889	RT @Bjrn17547904: @gruenenrw @Die_Gruenen Nein zum Nationalmasochismus der Grünen und anderen Linken Geisteskranken !!! https://t.co/8Jr1Zz…	HOF	HATE	hasoc_2020_de_382
1133098116880769026	@larsweisbrod Wir sind im Arsch...	HOF	PRFN	hasoc_2020_de_1001
1124001627797692419	Will ich mich verlieben oder bin ich einfach nur dumm?	NOT	NONE	hasoc_2020_de_3076
1126891050247835648	@ess_steffen A Flüchtlinge B Asylanten C Goldstücke D Facharbeiter	NOT	NONE	hasoc_2020_de_1447
1132772064232914944	@domi_twr @Aelydysdenossi @Morastmops Behinderte fresse? Der kann mich mal gewaltig am Arsch lecken!	HOF	OFFN	hasoc_2020_de_577
1124093202011701252	@politicalbeauty #naziaufmärsche können nicht unter freie meinungsäusserung, demorecht, genemigt werden, da nazis g… https://t.co/laRGYIErrm	NOT	NONE	hasoc_2020_de_1109
1127568392624513030	An alle Frauen der Welt. https://t.co/5a3bJEkP9Y	NOT	NONE	hasoc_2020_de_1654
1132876821186396160	@bodoloettgen Grün war schon immer linksextrem.	HOF	HATE	hasoc_2020_de_1484
1133233282496303104	@tagesschau Das wird den Linksextremisten und Merkels Fachkräften überhaupt nicht gefallen!	NOT	NONE	hasoc_2020_de_1422
1128219327595986944	RT @a_nnaschneider: Und die Krönung des ganzen ist Ökofeminismus aka: #birthstrike, also keine Kinder bekommen, der Umwelt zuliebe. Völlig…	NOT	NONE	hasoc_2020_de_1538
1126871286687383553	@krippmarie Der Brinkhaus ist auch nicht das, was man von ihm erwartet hat. Keinen Deut besser als der ganze CDU-Ve… https://t.co/2GsfsDflES	NOT	NONE	hasoc_2020_de_2777
1125783137420816384	Das ist der größte Fehler dieser ganzen Idioten. Jeden, der (noch) dümmer ist als sie, dennoch/"erst recht" maximal… https://t.co/l8GpjHfi4f	HOF	HATE	hasoc_2020_de_3007
1128937908361191424	RT @just__st: Junge ich hasse meine scheiß Hurensohn klasse.	HOF	PRFN	hasoc_2020_de_2620
1129801532340342785	@MaribonCW dumme hurensöhne die jungen	HOF	OFFN	hasoc_2020_de_1446
1132885524358881280	RT @LaVieVagabonde: In der nächsten BILD: Schwarze Schuhcreme und eine Anleitung, wie man sich dunkle Haut ~bastelt~! Herrje. https://t.c…	NOT	NONE	hasoc_2020_de_3228
1125073276659732481	@YuumaTsukumo @AfDBerlin Bei 1.67% von Islamisierung labern ist schon gewaltig debil.	HOF	OFFN	hasoc_2020_de_234
1124928833222844416	@AndreasStraub Ich würde nicht blöd sagen, sondern eher verblendet, sie haben sich von linken Rassisten leimen lass… https://t.co/HZgvuLkgW8	NOT	NONE	hasoc_2020_de_2371
1131236491815002115	S60 18:34 ab Böblingen nach Stuttgart Schwabstr. 19:33 an, fährt erst ab Maichingen um 18:40 #SBahnStgt https://t.co/12XHWNR5U8	NOT	NONE	hasoc_2020_de_2379
1133674938508947457	RT @gifev: Viel los in der gif Kompetenzgruppe Wohnen! Aktuelle Projektgruppen: Neue Wohnformen, Mikrolagen-Ranking für deutsche Großstädte…	NOT	NONE	hasoc_2020_de_1176
1124457540228665344	@Riesen_Einlauf Was Hurensohn du Spasti	HOF	PRFN	hasoc_2020_de_1893
1128708941293215745	RT @gottessohn13: Scheisse bleibt Scheisse und Nazis bleiben Nazis. Wer das Dreckspack wählt, wählt wieder Fackel Umzüge und Krieg und ha…	HOF	HATE	hasoc_2020_de_2070
1129819798530088960	@dagilp_lbh @1Lisschen93 Wäre ja dumm wenn nicht😂🤷‍♀️	NOT	NONE	hasoc_2020_de_2222
1130778947774558208	RT @B24PT: Dortmund contrata Schulz ao Hoffenheim. https://t.co/h6PwZr5gul	NOT	NONE	hasoc_2020_de_960
1127859473098387457	FWA was great :&gt;	NOT	NONE	hasoc_2020_de_2474
1125456006887161856	@Naku64 wo sollen die Nazis denn hin?	NOT	NONE	hasoc_2020_de_1560
1129054623254351872	@Quin_nsfw Willkommen zurück	NOT	NONE	hasoc_2020_de_2507
1133088608368365568	RT @3te_generation: Die Untote: Die Stimmenverteilung für Die Linke, AfD und Bündnis 90/Die Grünen (denn so heißt die Partei eigentlich) ma…	NOT	NONE	hasoc_2020_de_2899
1132681844787433472	Hört auf, Politik nur noch für Ü50 zu machen. Ihr habt bereits eine Generation vor den Kopf gestossen. Ändert euren… https://t.co/zgiRVhZLDU	NOT	NONE	hasoc_2020_de_2049
1134208391071633412	Ich und sera als wir uns gegenseitig arsch schickten https://t.co/aPH0OWKwRY	HOF	PRFN	hasoc_2020_de_3452
1129341916292812800	@Herr_Klartext @Pbern12 Spieglein spieglein an der Wand.... https://t.co/aocIQEIvme	NOT	NONE	hasoc_2020_de_2759
1126223711332372483	@HerrNewstime Man man man, die Community ist echt am Arsch https://t.co/Cjpq2eMTon	HOF	PRFN	hasoc_2020_de_812
1132687020537667586	Wünschte, die CDU/CSU hätte noch deutlicher eins auf die Fresse bekommen, aber man nimmt, was man kriegen kann, ne.	HOF	PRFN	hasoc_2020_de_3453
1133848448493641734	@Garfieldine @SexismObserver @zeitonline @SPIEGELONLINE Hop Hop ab in die Küche	NOT	NONE	hasoc_2020_de_609
1125425757558206466	Merkel schickt aus Hamburger Hafen Botschaft an Trump https://t.co/cska3LPkOO https://t.co/RevM9wSw9M	NOT	NONE	hasoc_2020_de_1723
1125021628004544512	@Stefan_K__ @Beatrix_vStorch Die türkischen Döner in der Türkei mit Dicherheit. Die deutsche Variante bleibt aber die deutsche Variante.	NOT	NONE	hasoc_2020_de_2824
1125878000023740418	Müssen und die Jungs entweder nichts machen oder halt anderen scheiß. Und er meinte, so; ja, stimmt. Und ich habe i… https://t.co/FdmP6HlIe2	NOT	NONE	hasoc_2020_de_2020
1127117244859912197	RT @jouwatch: Gewaltbereitschaft bei Linken immer noch hoch https://t.co/2JRVsCCOtm https://t.co/oMMthQA4Wf	NOT	NONE	hasoc_2020_de_103
1125684797794394112	@veganhure Was zum arsch ist thinspo?	HOF	PRFN	hasoc_2020_de_3286
1131999842555826181	@bootboss @tagesschau Die sind keine Experten und schon raus	NOT	NONE	hasoc_2020_de_538
1128620105947021312	RT @tagesschau: Europäische Spitzenkandidaten im Kurzporträt https://t.co/HYi6dC35vq #Kandidatencheck #Europawahl2019	NOT	NONE	hasoc_2020_de_2763
1131312459053195267	@ItsDesey Perkz &gt;:)	NOT	NONE	hasoc_2020_de_2520
1132360225556709376	Gunlike ist gerade von schwule hurensohn zu einen noch größeren schwulen hurensohn aufgestiegen	HOF	OFFN	hasoc_2020_de_1349
1132687339325730817	Das einzig Positive ist die geringere Anzahl an Sitzen für den linken Parteienblock.	NOT	NONE	hasoc_2020_de_732
1123559149688717313	Ich weiß einfach jetzt schon dass Staffel 8 von Voltron scheisse wird. Tu ich es mir trd an? Auf jeden Fall	HOF	PRFN	hasoc_2020_de_1156
1125560029837393920	@eVoRoX750 Ich fresse mich gerade voll, denk einfach an mich, dann schläfst du schon ein 🤪	NOT	NONE	hasoc_2020_de_1645
1133308276676931584	Produktivität am Arbeitsplatz: Frauen sind bei Wärme leistungsfähiger als sonst ➜ https://t.co/kFpNQQoASY	NOT	NONE	hasoc_2020_de_1762
1125506510505828352	@Jodl @Merkur @maas @RegSprecher Ich glaube kaum, dass @HeikoMaas oder @AuswaertigesAmt dafür Zeit haben. Die sind… https://t.co/9q2jzjuZnm	NOT	NONE	hasoc_2020_de_74
1129322953856966657	RT @artep21: @Joerg_Meuthen Nicht die Grünen ?😂😂😂😊Bald bei „Naked Attraction“ - Grünen-Politiker outet sich als Fetisch-Aktivist https://t.…	NOT	NONE	hasoc_2020_de_2057
1131234554059137027	@GedichtW @HerrNaumann @dergazetteur es ist halt echt 😂	NOT	NONE	hasoc_2020_de_2249
1125608570526011397	RT @ZDFheute: Erster Deutschland-Besuch: Pompeo trifft Merkel und Maas https://t.co/yA3eZwN32J	NOT	NONE	hasoc_2020_de_790
1133456889256316929	einfach nur ich https://t.co/aGSxZJoyhG	NOT	NONE	hasoc_2020_de_1255
1132641441023483904	@VollzeitJonas @mjwock Ist ja auch kein Fehler. Allemal besser als Grüne, Linke, Ökolinx und die ganzen anderen Ideologen.	NOT	NONE	hasoc_2020_de_279
1133484030572285953	@polizISTmensch Deutsche Medien?	NOT	NONE	hasoc_2020_de_1273
1127685824731131905	@schnischna1992 Bin am Arsch ALLA	NOT	NONE	hasoc_2020_de_359
1132753504462942210	doktor deutsch porno deutsche klassische porno xhamster von mutter gefickt frauen orgasmus porn https://t.co/C4wwqU5TnT	HOF	PRFN	hasoc_2020_de_543
1131610258814709762	@edgyluwuca Wenn du die Umfrage machen würdest alle würden dich für dumm verkaufen, dass du überhaupt fragst	NOT	NONE	hasoc_2020_de_1828
1127827307010433024	Wenn #AKK es mit den Personalentscheidungen so hält wie #Merkel, ist #Merkel sehr bald nicht mehr BK.	NOT	NONE	hasoc_2020_de_2978
1131707654739566592	RT @_KingRighteous: Raleigh &gt; Durham	NOT	NONE	hasoc_2020_de_2748
1133005531789103104	@Musashi_Haiku Ja, die #Haltung ist schon wichtig ! Wir brauchen neue Politiker in der Verantwortung, die mit der V… https://t.co/3bGfXZv9pc	NOT	NONE	hasoc_2020_de_2129
1126967747315781632	RT @genialewelt: "Er hat Waldnattern gesagt, erst mal melden!" Echt jetzt? 🤦‍♂️ https://t.co/nEgw0GnFpk	NOT	NONE	hasoc_2020_de_787
1132216784533303296	Mein Puls ist auf 180, ich zitter und muss mich echt zusammenreißen, nicht loszudiskutieren. Weil es alles an ihrer… https://t.co/jBjfRPU58W	NOT	NONE	hasoc_2020_de_3086
1129002999777570816	@SirSchnee Es kommt ,auch bei den Grünen, letztendlich immer braun raus!💩😉	NOT	NONE	hasoc_2020_de_488
1128323174406467585	RT @HaraldRostock: Der renommierte deutsche Anwalt Wilfried Schmitz hat Strafanzeige gegen Merkel und ihre amtlichen Mitarbeiter „wegen Bet…	NOT	NONE	hasoc_2020_de_327
1127175939983585280	@BoserEr @Lebensformation @DrDavidBerger Von den Medien wird soviel unter den Tisch gekehrt, möchte nicht mal unter… https://t.co/vqfIICcwTQ	NOT	NONE	hasoc_2020_de_224
1123631048443744256	RT @coraxaroc: Nazis. Es sind Nazis. Neons sind Reklame oder Fische und leuchten hübsch bunt. https://t.co/h4hE438D5y	NOT	NONE	hasoc_2020_de_2199
1134100039637200896	Wetlook Arsch Showoff mit Dirty Talk https://t.co/vYct0k52cD https://t.co/Rteygy4Jqb	HOF	PRFN	hasoc_2020_de_2784
1127880637564715010	@Lebensformation Wie wäre es mit abschieben, dass primitive Gesindel?	HOF	OFFN	hasoc_2020_de_424
1131515152958918656	RT @D4ncingMonkey: #Amthor Leben und Tod des @rezomusik "Es wird langsam Zeit, mich zu der Scheiße hier zu äußern. Die Lügen, die Du über…	NOT	NONE	hasoc_2020_de_1896
1130285936678440961	@luaks030 Alle bis auf die Grünen 🤓 🍌	HOF	HATE	hasoc_2020_de_2982
1130177346164670465	@gabkurt1 @srfnews @CurdinV Die Welt ist nicht einfach schwarz-weiss. Es gibt auch noch #Grautöne. Sie sind übrig… https://t.co/YthXNTrtNG	NOT	NONE	hasoc_2020_de_3179
1130236544571367424	[Empfohlen mit WELT News: Gewalt von Zuwanderern gegen Deutsche nimmt zu] Gewalt von Zuwanderern gegen Deutsche nim… https://t.co/JNJbrZnTsJ	NOT	NONE	hasoc_2020_de_1853
1132250171218309120	RT @Reiner02192679: #Grüne sind in jeder Beziehung in der Politik und im Privaten, die aller Schlimmsten! Finger weg, von den #Grünen https…	HOF	HATE	hasoc_2020_de_160
1133120183105662978	@FlXMYDlSEASES Merkel muss weg	NOT	NONE	hasoc_2020_de_2830
1131220729607970816	@heiner_gesper @alexarusss @bernd471 Ach laber doch keinen Scheiss du arme Linksoma https://t.co/70M6F7AWHk	HOF	PRFN	hasoc_2020_de_2280
1127987315509350408	Deutsche Behörden sehen untätig zu: Das Steuerkarussell: So funktioniert der Milliarden-Raubzug, der Europa erschüt… https://t.co/2ho4XtlJY3	NOT	NONE	hasoc_2020_de_126
1125815337121996800	@Obviant @Buloneee 2 Antworten, 2 mal hurensohn, der Pflegefall bist dann doch eher du. https://t.co/XP4PM4tIxn	HOF	OFFN	hasoc_2020_de_348
1131934855992938496	Hat da jemand auf die Fresse bekommen oder was ist da los?	NOT	NONE	hasoc_2020_de_258
1123665789880623104	RT @trackmaniagamer: der pädo lord abbadon wurd kein stück verurteilt für die scheisse, ist jetzt finanzberater und ich muss sowas sehen (k…	HOF	PRFN	hasoc_2020_de_803
1131813049244049408	Gauland: Forderung nach einem europäischen Islam ist eine Schnaps-Idee https://t.co/Q6cHhXfsVC via @jouwatch	NOT	NONE	hasoc_2020_de_306
1127267946215223297	nap auf arsch	HOF	PRFN	hasoc_2020_de_14
1125008478857256962	RT @masyaf_sy: Das halte ich für groben Unfug. Oder die Propaganda der Öffentlich-Rechtlichen ist effektiver und die Deutschen als Ganzes s…	NOT	NONE	hasoc_2020_de_568
1125423274534604801	Reppinum kriegt die Eier mir zu linken wenn ich 1 Monat inaktiv war und nicjt sprinten kann 😂😂😂😂	NOT	NONE	hasoc_2020_de_3235
1126844199901564930	RT @Daffyfuq: Ihr habt alle einen Stock im Arsch weil ihr keine Pornos mit gummipuppe hochladet	HOF	PRFN	hasoc_2020_de_2810
1134169870571098112	RT @hl_h2o: Komm,mein Herz,geh und leg dich wieder in deine Schatulle. Ich schließe ab und pass ab jetzt noch besser auf dich auf.	NOT	NONE	hasoc_2020_de_1212
1130947797879054336	Garantiertes bpl pack hat gegönnt @GamerBr0ski also manche mussten seine sbc machen Kappa https://t.co/TkgZIgPzYF	NOT	NONE	hasoc_2020_de_2508
1126826319545815040	RT @verusoss1: Doch, Deutschland fördert Islamisten, arabische kriminelle Clans, Schmarotzer und Taugenichtse aus aller Welt und völlig übe…	HOF	HATE	hasoc_2020_de_2752
1127937646540546049	@ZDFheute Es ist halt ziemlich sinnfrei, 200l in einen 60l-Tank füllen zu wollen, wenn man gar nicht wegfahren möchte...	NOT	NONE	hasoc_2020_de_90
1126094111545729027	@tagesschau @MiriamOzen Schon wieder framing ...	NOT	NONE	hasoc_2020_de_824
1123644268885704704	Es gibt politische Versager, die die Verstaatlichung von BMW fordern. Kannste Dir nicht ausdenken. Eher tritt Bayer… https://t.co/yAwTPaCnvT	NOT	NONE	hasoc_2020_de_2548
1131666856744497155	@zSkaveYT @_Sypherox_ @luuxaa_ @GANGMEMBERGAARA @zKidaa @HabeBrot @Die_Paedagogin @_txm3rx @Benizzel1 Dumme 13 hat er dich eingeschätzt	NOT	NONE	hasoc_2020_de_3343
1127954981624135681	Top #Anwalt klagt #Merkel an, wegen #Voelkermord. https://t.co/XZ4gevKEcA	NOT	NONE	hasoc_2020_de_2116
1132717114677178369	@ZDF Grüne 20,5% ?! Germany is doomed!	HOF	HATE	hasoc_2020_de_3264
1126245664319524870	⭐ EU-Richtlinie: "Ein Schlag ins Gesicht der Kleinaktionäre" [premium] ⭐ https://t.co/2q0HLKpzob	NOT	NONE	hasoc_2020_de_2908
1127086316083122176	RT @GriffinthePeter: legende einfach https://t.co/TagdvUzPOI	NOT	NONE	hasoc_2020_de_1989
1124844213110235137	#Gabriel: Das hätte ich nicht von S. Gabriel erwartet, dass er auf Kevin Kühnert herumhackt. Schließlich hat der Ju… https://t.co/BJuH4TqcOK	NOT	NONE	hasoc_2020_de_3436
1127199067359068161	#Betze das Spiel spiegelt unsere Führungetage. Ein Passfehler nach dem anderen und kein Arsch in der Hose.	HOF	PRFN	hasoc_2020_de_3214
1127906768095457280	RT @1967Gorzata: @SBunners Ja, mit 0,2 % wieder mal wie #Merkel die Welt retten. Fanatisch und unverantwortlich.	NOT	NONE	hasoc_2020_de_2561
1132411274401329154	@gagadaily scheisse + hair	NOT	NONE	hasoc_2020_de_1846
1133301603518373888	RT @burger_ein: Omas gegen Rechts, Moslems, Linke und Pfarrer bei Gegendemo Starnberg: Linke wollen AfD mit Besen vom Kirchplatz kehren htt…	NOT	NONE	hasoc_2020_de_1866
1134154779486240768	michellemalkin: 3) #freespeechfriday reminder ==&gt; https://t.co/0ABHiLCKl0 #fightthecensors #pjnet #tcot	NOT	NONE	hasoc_2020_de_2322
1126914982954848257	@ainyrockstar Oder Patrioten die die 1. Strophe des Deutschlandliedes singen als Nazis zu bezeichnen!🤷	NOT	NONE	hasoc_2020_de_2138
1129290963892015104	RT @sulemannmalik: Gehört der Islam zu Deutschland? Deutschland ist ein säkularer Staat.Entsprechend gehört Deutschland keiner Religion an.…	NOT	NONE	hasoc_2020_de_2858
1125815521658712064	@TimoKloepper @gruene_jugend Als grüne Jugend in FFF-Tagen und im Angesicht der Grossprobleme der Welt hielte ich… https://t.co/ZoU24B6rfM	NOT	NONE	hasoc_2020_de_2796
1129508488890265605	RT @Arnd_Schumacher: @AF_Will @TimmermansEU Schwache EU-Aussenpolitik sorgt dafür, dass der Islam bald zu Europa gehört. Der UN-#Migrations…	NOT	NONE	hasoc_2020_de_2407
1130001743255728128	@halia_yee_ durex &gt; trojan	NOT	NONE	hasoc_2020_de_1393
1124600922510954496	DWD -&gt; WARNLAGEBERICHT für Deutschland – https://t.co/oDGEQWCLEK	NOT	NONE	hasoc_2020_de_593
1133612703447179264	Warum zünden Frauen ihren Arsch an? Weil sie es können.	HOF	PRFN	hasoc_2020_de_1966
1131425126443028481	@eysvog3l @SM100d Genau , es sind die täglichen Lügen die Grünen brauchern !	NOT	NONE	hasoc_2020_de_1277
1124379291310010368	@SapereAudeDE @mariomayl So ein asoziales Pack... raus aus Deutschland	HOF	HATE	hasoc_2020_de_1845
1125103433713901569	@tagesschau Einen Scheiss wünsche ich denen!	HOF	PRFN	hasoc_2020_de_1315
1132344857597493249	@TiloJung Sorry, aber das kann ich so nicht stehen lassen. Denkt halt mal etwas größer und nicht immer so #linear i… https://t.co/5fiDT43dss	NOT	NONE	hasoc_2020_de_2563
1132382027536326660	@tinten_killer In dein Arsch?	HOF	PRFN	hasoc_2020_de_3330
1125463623768391680	@Nichttweeterin Keine Ahnung. Stimmt, ist was Italienisches.	NOT	NONE	hasoc_2020_de_417
1127149935302991873	@_nasir_ahmad_ Warum müssen immer die muslimische Frauen Kopftuch ablegen was ist mit den anderen??? https://t.co/9HuMGR4tzN	NOT	NONE	hasoc_2020_de_2029
1133344658032087040	RT @kallepilsbier: Deutsche Donald Trump https://t.co/rXpGeBqZw6	NOT	NONE	hasoc_2020_de_1826
1133676125505433601	Vom „Fabrikle“ zum Global Player – das ist unsere #Unternehmensgeschichte, die ab nun auch auf Englisch hanserliter… https://t.co/z3C7xaYyF1	NOT	NONE	hasoc_2020_de_2042
1133076222576082944	@MazeMatze Haha :D Volkslehrer, Ingo Schulz und Reconquista Germanica	NOT	NONE	hasoc_2020_de_414
1131205428807950336	@RegSprecher Offener Brief an Bundeskanzlerin #Merkel -wieder einmal🤔 Ab und zu habe ich einen Brief an das Bundesk… https://t.co/YF2EyYOG4b	NOT	NONE	hasoc_2020_de_1470
1129823149753798658	RT @UnDEANiable: Steve Hofmeyr &gt; Kaizer Chiefs	NOT	NONE	hasoc_2020_de_992
1130936943011860480	@just_n3rdy *einfach mal so den Nacken krault....* :D :D :D :	NOT	NONE	hasoc_2020_de_2856
1127125755119452160	@StefanSkibbe @Karl_Lauterbach Jap. Zum Kotzen.	NOT	NONE	hasoc_2020_de_2398
1127280982107803649	@milfdiana2 Geiler Arsch zum verwöhnen	HOF	PRFN	hasoc_2020_de_1689
1129474657642524672	#Direktflug Merkels #Fachkräfte und Sofort-und #Dauerrentner bei Anreise an die deutsche Geldbörse https://t.co/PtZk1o4tSY	NOT	NONE	hasoc_2020_de_3174
1131269123483295750	Match issn verdammtes scheiss wort	NOT	NONE	hasoc_2020_de_2071
1123695657523585025	@AtotheIex die ist so dumm	HOF	PRFN	hasoc_2020_de_1936
1126176563165188097	RT @EdzardErnst: @extra3 @jnfingerle Politiker, die keine Ahnung haben, haben keine Ahnung, dass sie keine Ahnung haben!!!	NOT	NONE	hasoc_2020_de_2151
1128294594410627072	@SPIEGEL_Politik @SPIEGELONLINE Politiker sind die größten klimaschädlichen Treibhausgase Verbrecher.	HOF	HATE	hasoc_2020_de_3210
1131612636972498945	@bheinzlmaier Idioten machen sowas...	NOT	NONE	hasoc_2020_de_2558
1129675615114858496	@klinger291259 aBeR dIe LiNkEn! q.e.d.	NOT	NONE	hasoc_2020_de_668
1129330860111667201	RT @Hadmut: Kapazitäten im ZDF und zur Eurowahl: Den Islam gibt es erst seit dem 7. Jahrhundert, aber Frans Timmermans, der Kommissionspräs…	NOT	NONE	hasoc_2020_de_3500
1134165042939736066	RT @ExGruene: @tagesschau Hat sich die Tagesschau schon von ihrer #Özil Berichterstattung distanziert? War der Schnappschuss mit #Erdogan n…	NOT	NONE	hasoc_2020_de_3341
1131280263554555904	RT @hoeferjunge: Wieso eigentlich nich "media markt - ich bin doch kein hurensohn" würde viel heftiger wirken is mir doch egal ob ich blöd…	HOF	PRFN	hasoc_2020_de_1299
1123880693413613569	RT @lawyerberlin: #Linke und #Grüne wollen enteignen, die Medien kontrollieren, ganze Dörfer zwangsumsiedeln, Kritiker wie Palmer oder Sarr…	NOT	NONE	hasoc_2020_de_1792
1125770005063323649	RT @DrDavidBerger: Unerhört! AfD möchte Einbürgerungsverbot für Ausländer, die in Mehrehen leben https://t.co/L8jRitdyf3 via @DrDavidBerger…	NOT	NONE	hasoc_2020_de_2147
1125276364834209792	@BILD Deutschland ohne Hitler wäre geschichtlich öde und langweilig und nebenbei kann man sich als Antifaschist zu… https://t.co/YgWG2eqo4Y	NOT	NONE	hasoc_2020_de_1575
1126173723600441344	RT @haramizemer: wie könnt ihr eigentlich single sein? seid ihr zu hässlich oder einfach nur scheiß Charakter? macht ihr euch keine Gedanke…	HOF	PRFN	hasoc_2020_de_83
1128515458070720513	@Ralf_Stegner Meinen sie echt die 🇺🇸 warten auf sie ?	NOT	NONE	hasoc_2020_de_749
1130047863797559297	RT @SteinbachErika: Es war und ist die deutsche Kanzlerin die Europa spaltet! https://t.co/J6D3kUKRWZ	NOT	NONE	hasoc_2020_de_606
1124987855464480769	Typisch Arschloch. Wie Merkel.	HOF	OFFN	hasoc_2020_de_2366
1123711612622397443	RT @DavidGeorge91: Scheiß auf @KarlLagerfeld Ich trage Jogginghose 😂	HOF	PRFN	hasoc_2020_de_1590
1124896608393539584	RT @DaRaschi: In Zwickau ist das "Maas" voll, hunderte Bürger "verjagten" den Bundesjustizminister Heiko Maas aus der Stadt. Er flüchtete m…	NOT	NONE	hasoc_2020_de_315
1131553220474605568	RT @erkanallesffm: @iBlali Dumme Youtubevideos: gemacht, Nazis: relativiert, Feminismus: erklärt yep, its ich kotze meine unnötige Meinung…	HOF	OFFN	hasoc_2020_de_506
1129337239647862784	RT @HyperBushido: Adolf Hitler 1923 als er wegen putschversuch in knast gekommen ist https://t.co/5wGo2MkzEA	NOT	NONE	hasoc_2020_de_453
1129299763566981120	@CCrunk9 Was erwartet der hurensohn was passiert	HOF	PRFN	hasoc_2020_de_2906
1125361018488655872	RT @Hartes_Geld: Wer sich in #England zum Imam ausbilden lässt, lernt folgendes: "Allah ist glücklich, wenn Moslems ihre Frauen vergewaltig…	HOF	HATE	hasoc_2020_de_1789
1134252942985482240	RT @tomatenhass: kastor von akielos dieser kleine hurensohn	HOF	PRFN	hasoc_2020_de_2882
1124319522473881601	RT @PatMair1: @AfDBraunschweig Warum sterben die Insekten? Die #Grünen verspargeln unsere Landschaft mit "Todesanlagen" für Insekten! #Grün…	NOT	NONE	hasoc_2020_de_3479
1128588342461911041	RT @KeineAFD2017: ERINNERN WIR UNS und zwar vor der #Europawahl2019 ! Nazis marschieren wie 1933 über unsere Straßen in #plauen0105 #plau…	NOT	NONE	hasoc_2020_de_1740
1133768702200037377	@BarbaraKaufmann Das Verhältnis ist zerrüttet. Die GRÜNEN müssen von selbst in den NR zurück finden. JETZT schafft… https://t.co/tsyoBhXYN5	NOT	NONE	hasoc_2020_de_2355
1123719388887166976	#zdf #meinerstesmal zeigt mir nur wie Politiker sich immer wieder ins rechte Licht rücken. #ekelhaft	NOT	NONE	hasoc_2020_de_2703
1133210369030348803	@lou_lorenz @SonjaAblinger so eine MännerWG ist halt schon lässig... ;-)	NOT	NONE	hasoc_2020_de_589
1123564409333399552	EU-Abgeordnete über Martin Schulz: "Ich bin sehr froh, dass wir ihn los sind" https://t.co/HiNEq8q0lM via @China_Welt_News	NOT	NONE	hasoc_2020_de_2802
1131833521604038657	@Rabensalat @RanaJeanne einfach nicht kündigen lassen! einfach kinderbetreuung haben! einfach nicht umziehen! EINFACH!	NOT	NONE	hasoc_2020_de_1977
1132973244041093121	Ich sehe schon kommen, dass die Grünen aus meinem Ortsverband bei mir anfragen, ob ich in den Gemeinderat möchte, w… https://t.co/kutVHvhIGb	NOT	NONE	hasoc_2020_de_70
1124269492824092673	@welt Wir brauchen ehrliche Politiker die für Klarheit Wahrheit und Transparenz stehen .Wir brauchen Bürger die nic… https://t.co/unuxnLbHVB	NOT	NONE	hasoc_2020_de_457
1129938031757189120	free deutsche pornos blond hund fickt frau sexi reife frauen flotter dreier deutscher porno https://t.co/thDN0DwqqB	HOF	PRFN	hasoc_2020_de_3261
1124533499082551296	RT @Textvergessen: Ich bin auch Organspender. Mein Hirn soll im Falle meines Ablebens ein AfD-Wähler bekommen.	NOT	NONE	hasoc_2020_de_325
1132763419784949761	RT @heike_gassmann: Im Land von Greta Thunberg stürzen die Grünen ab via @welt https://t.co/75x5n8ZLNO	NOT	NONE	hasoc_2020_de_116
1132183901210857473	RT @in_so_fern: Wenn Du mit einem Idioten diskutierst, gewinnt immer nur einer und das bist nicht Du.	NOT	NONE	hasoc_2020_de_2818
1134183955043966976	@MadcapKostia @winstspencer2 Gay deutsche dung	HOF	PRFN	hasoc_2020_de_3032
1132720319108718593	@ZDF Mehr Frauen braucht das Land.	NOT	NONE	hasoc_2020_de_2206
1125900619875794944	SpFUgANg Ihr dummen lappen	HOF	PRFN	hasoc_2020_de_1037
1130891690657632256	RT @tantetictac: Rehe dystopische Hundesöhne einfach 😡😭 https://t.co/UEEqOzbPCs	HOF	PRFN	hasoc_2020_de_2837
1134336384439918593	@TheFaboHD einfach unge mit draufklatschen	NOT	NONE	hasoc_2020_de_1537
1131630425024225280	@saltyironflower WARTE DU BIST DEUTSCHE??	NOT	NONE	hasoc_2020_de_1623
1129264237795270656	@HeikoMaas Politiker machen du Du Du aber nicht einer übernimmt von Ihnen Verantwortung für das was Sie alle über J… https://t.co/TBgl1lzEHp	NOT	NONE	hasoc_2020_de_1335
1123534508135989248	RT @KlischkoE: Merkel will stärkeren Islam in der BRD Nach Ansicht von Bundeskanzlerin Angela Merkel (CDU) wird der Islam in Deutschland i…	NOT	NONE	hasoc_2020_de_873
1127614110521266176	Er ist einfach 7 Jahre jünger als ich und baggert mich besser an als jeder Typ vor ihm	NOT	NONE	hasoc_2020_de_296
1130198636451770369	@WS_Porsche Den eliter war einfach domm	NOT	NONE	hasoc_2020_de_3123
1131536875288707073	Das ist..... Ein joke oder? Nein? Ich möchte mir grade einfach nur noch den Kopf an die Wand hauen. @CDU: "wir b… https://t.co/whFYLhPDza	NOT	NONE	hasoc_2020_de_432
1133093431805448194	RT @LukederTypda: Ich kicherte mir meinen verfickten Arsch ab https://t.co/1Vxq17PHz1	HOF	PRFN	hasoc_2020_de_1929
1129441644284133377	@RaunigMichael Derzeit scheisst er sich voll an, danach ist eine Verschwörung der Linken und die Insel Ibiza gibt es gar nicht.	NOT	NONE	hasoc_2020_de_3297
1134204658141020160	Errol ist einfach eine Verkörperung meiner Persönlichkeit	NOT	NONE	hasoc_2020_de_685
1129696049763880960	RT @SirSchnee: #Buntland ist bald abgebrannt? 🤔 Beharrlich weigerte sich der mit einer Deutschen verheiratete Tunesier, seine Mütze abzune…	NOT	NONE	hasoc_2020_de_882
1130103195068436480	RT @derherrschulz: "Der neoliberale und der autoritäre, rassismusgetriebene Staatsumbau gehören zusammen. Das eine lenkt vom anderen ab o…	NOT	NONE	hasoc_2020_de_1938
1128371056547368961	RT @lovelisa18x: Mein Arschloch liebt auch Schwänze ❤️ RETWEET, wenn du jetzt dein Schwanz in mein Arsch stecken könntest 😉 https://t.co/rN…	HOF	PRFN	hasoc_2020_de_2424
1132753361860734976	@Lemurian1897 @krustytheboss @tagesschau Ich bin kein Nazi aber	NOT	NONE	hasoc_2020_de_1683
1128771591603666944	@Herr_Klartext @StefanS56831841 @lawyerberlin Doch Linksgrünes Pack	HOF	PRFN	hasoc_2020_de_1477
1130861273569222661	RT @ryuuly: als goethe gesagt hat 'wer animal crossing nicht ehrt ist meinen arsch nicht' wert i really felt that	NOT	NONE	hasoc_2020_de_301
1131947719952613376	RT @MediaRings: Dean Stuart Illustrations &gt; Dirk Petzold https://t.co/Ggd1JOBepW #productdesign #designthinking #DesignInspiration #Graphic…	NOT	NONE	hasoc_2020_de_63
1126845076473360390	Die Aerith is schon ne hübsche, aber ich warte vergeblich auf Vincent Valentines reitbares Gesicht	NOT	NONE	hasoc_2020_de_394
1134255589561905154	RT @liiamichel: @AhmadMansour__ Weil die Männer im Islam die Frauen unterstützen und nicht zugucken wie den Frauen die Rechte verweigert we…	NOT	NONE	hasoc_2020_de_1070
1123911009851314176	Kommunikation, was ein hurensohn	HOF	PRFN	hasoc_2020_de_2356
1125670025430470656	RT @den_tyske: ICH KÖNNTE 🤮 Wie wäre es denn mal mit einem Pilotprojekt für bedürftige deutsche Rentner? Oder einem Pilotprojekt für arme…	NOT	NONE	hasoc_2020_de_916
1123608613099122688	RT @E_Fensterheber: @LaraIstanbul guck wie dieser hipsterschlampe der kopf anschwillt weil sie gluten isst 🤣🤣 die will einfach mitleid	HOF	OFFN	hasoc_2020_de_19
1126126625786073088	RT @Lovefefee: Denkt ihr die neuen Nazis würden davor zurück schrecken millionenfach zu töten, oder sind sie harmloser als ihre Vorbilder?…	NOT	NONE	hasoc_2020_de_186
1126810196678934528	Kennst du schon „Mein Kampf - Adolf Hitler - Volk und Rasse“ von User 167067272 auf #SoundCloud? #np https://t.co/UgXSJkfael	NOT	NONE	hasoc_2020_de_3457
1123855804409552896	Juso-Chef: Die radikal linken Tagträume des Kevin Kühnert - WELT https://t.co/zSojmCfqdr	NOT	NONE	hasoc_2020_de_1467
1131296034162970627	@Cloud_Plays Aber nur deutsche Kartoffeln!	NOT	NONE	hasoc_2020_de_922
1128047260506439680	RT @Rapid__RTs: RT: (ChillJo1) &gt; https://t.co/PS9WAcUKXw	NOT	NONE	hasoc_2020_de_2829
1133509640996687872	RT @ava_uff: sorry aber rauchen ist halt einfach sexy	NOT	NONE	hasoc_2020_de_2670
1131110436202602497	RT @PatrickGensing: Das Profil von "Dora Bromberger" ist nach Sperrung mittlerweile als "Ex Grüne" unterwegs, Schwesteraccount "Emma Richte…	NOT	NONE	hasoc_2020_de_280
1126221786134269958	RT @DerSPIEGEL: SPON-Regierungsmonitor: Merkel immer beliebter https://t.co/3TywZnBZF5 https://t.co/o4NUKXwnb9	NOT	NONE	hasoc_2020_de_1649
1131617150043611136	@BB12_DE @krippmarie @KunkelMuhme Schützen muss man sich vor dem Linken Terror und Gewalt, der Hass auf das eigene… https://t.co/kYJE9qJZCl	NOT	NONE	hasoc_2020_de_1589
1130893259318988800	Wie lange sollen wir Johanna noch ertragen? Kann die nicht einfach auswandern???#gzsz	HOF	OFFN	hasoc_2020_de_1937
1131220545075388416	RT @AFCAjax: Today’s starting XI! 📋👀 #AjaxO19 -&gt; Reiziger; Kasanwirjo, J. Timber, Rensch, Salah-Eddine; Taylor, Q. Timber, Llansana; Hans…	NOT	NONE	hasoc_2020_de_3125
1132879597811449856	Die politische Landschaft war früher von Rot und Schwarz dominiert. In Zukunft wird sie von Grün und Nationalisten geprägt sein.	NOT	NONE	hasoc_2020_de_2085
1123586924382445569	RT @CorneliaNoack: Ich bin Ossi und schäme mich zutiefst fremd für die Merkel. 40 Jahre mußten wir die Diktatur ertragen, die Merkel jetzt…	NOT	NONE	hasoc_2020_de_756
1132973210486607872	@lawyerberlin @Peaches1804 Hat ja irgendwie, was vom Vierten Reich. Die Grünen leiten dies alles, wie Hitler damals.	HOF	OFFN	hasoc_2020_de_683
1132150271281434627	RT @tschemal: Deutsche K-Pop https://t.co/lbSBgGUBjl	NOT	NONE	hasoc_2020_de_656
1127082205648437248	Gabriel V. 🖤 https://t.co/apynLAt21z	NOT	NONE	hasoc_2020_de_832
1133697470335262720	@DaniEngel6 @HeikoMaas @BILD "Bethäuser" für Kirchen ist brutal ! 😀	NOT	NONE	hasoc_2020_de_3328
1124291907184734210	@Grolmori 👀 ist er Single? Hört sich nach meinem Traum-Mann an! 😍	NOT	NONE	hasoc_2020_de_2331
1129005717661388800	@ZDFheute “Nazi Schlampe“ hat mal wieder gestampft?	NOT	NONE	hasoc_2020_de_34
1134167815378886658	RT @SirSchnee: #Terror in #Lyon: Algerier legt ein Geständnis ab. Vor einigen Jahren wäre eine mit Nägeln versehene Bombe in der Fußgänger…	NOT	NONE	hasoc_2020_de_3120
1130875697768091648	RT @baerbeli04: @DaniEngel6 Das Einnisten in unsere Sozialsysteme wollen die Grünen zum Menschenrecht erklären. Steuern und Sozialabgaben,…	NOT	NONE	hasoc_2020_de_3389
1129375512676196352	hbsche frauen nackt nackte gefesselte frauen cartoon tube gratis https://t.co/QlgggCFC4k	HOF	PRFN	hasoc_2020_de_2532
1132609249773850624	RT @ralph_bremer: Ich wähle #PIRATEN Die sind ehrlich und Grün und Freiheitlich ! Oder nehmt die Linken, die werden nicht schwarz Mit de…	NOT	NONE	hasoc_2020_de_1573
1126204899853783041	@Jasmin_Pur @Mr_Empty_hier @KM_Baehnk hört hört! 😏	NOT	NONE	hasoc_2020_de_2025
1129977076541530112	Neueste Videos : 18.05.2019 von BouncyTitAction -&gt; Arsch versohlen in Fishnets https://t.co/bzbpPlIsgw	HOF	PRFN	hasoc_2020_de_1209
1125769191393583104	@janboehm Wenn man den Tenhagen von @SPIEGELONLINE fragt, dann reicht es schon aus, den Stromanbieter zu wechseln.… https://t.co/x3sSBK7zad	NOT	NONE	hasoc_2020_de_3225
1129701150058602497	@ZDFheute Man stelle sich vor, ein Afghane wäre durch Deutsche nach Tritten auf den Kopf gestorben. Das Strafmaß w… https://t.co/WGjZt82txB	NOT	NONE	hasoc_2020_de_2869
1132385575917346818	RT @fabianphx: @GaziGhost Kimmichs assist &gt;	NOT	NONE	hasoc_2020_de_176
1128699642533896193	Fazos &gt; Shell Tops	NOT	NONE	hasoc_2020_de_1569
1130725940135387136	RT @ndaktuell: Es darf es nicht sein, dass #Flüchtlinge miserabel bezahlt und dazu missbraucht werden, Löhne zu drücken. https://t.co/SZThr…	NOT	NONE	hasoc_2020_de_1206
1132999823349702661	Haben Sie eine Minute, um Jens Merkel zu helfen? https://t.co/PUfu0HBU5D	NOT	NONE	hasoc_2020_de_3044
1128328614385266690	Deutsche Grey‘s Anatomy https://t.co/os4nMsQyy9	NOT	NONE	hasoc_2020_de_2514
1129409838872702978	Die IT-Woche: inside_it -&gt; https://t.co/XkboJ1AThz	NOT	NONE	hasoc_2020_de_3348
1130911588456779777	@bbabyaleyna @aceofmrtz @NamelstProgramm @lassmichbitteee halt die fresse	HOF	PRFN	hasoc_2020_de_3271
1127274984261464067	Bb hurensohn game Jeder spast ist nur am wkeyen Alter was soll das https://t.co/kzbJmvb0Of	HOF	PRFN	hasoc_2020_de_1503
1123615747605975040	@hanvoi Es wird Zeit, dass Plauen unter Bundesaufsicht gestellt wird. Dann kann mit dem braunen Pack mal aufgeräumt werden!	HOF	HATE	hasoc_2020_de_2305
1129658414282477568	Gleichberechtigung bei der Wahl: "Klasse, dass wir nicht mehr für dumm gehalten werden" https://t.co/WsxKj4JeHd	NOT	NONE	hasoc_2020_de_2656
1133044480100184064	Die tritt freiwillig nicht zurück, die muss man raus tragen wie Merkel &amp; Co	NOT	NONE	hasoc_2020_de_2482
1127928725281169408	Das sind Politiker! https://t.co/oPFYLr3jHx	NOT	NONE	hasoc_2020_de_2481
1130757317752950786	@tony_pip Es kommt immer wieder vor. Aber die Konnotation in Medien war "Nazi-Treffen" - das war den Linken Hetzern… https://t.co/LoqG2cWKzB	HOF	HATE	hasoc_2020_de_2624
1134578433554550795	RT @ruketsueki: Kanacke: du hurensohn fuck nicht ab Typ: bist du nicht der kleine bruder.... Kanacke: bruder war spaß wie gehts alles gu…	HOF	PRFN	hasoc_2020_de_2699
1134525425919639552	@MadIceGG Dein engstirniger Eurozentrismus ist zum kotzen.Europa hatte ein Dunkles Mittelalter. Der Islam zu der Ze… https://t.co/SlMBuqnlvn	NOT	NONE	hasoc_2020_de_3151
1131642278135701511	Das MTG Arena Event ist einfach nur fürn Arsch.	NOT	NONE	hasoc_2020_de_428
1125350654371872769	@BilBuHa_iR Warum färbt Frau Roht sich nicht schwarz und trägt ein Kopftuch???	NOT	NONE	hasoc_2020_de_734
1124052949280469002	@verpeilteTomate Das schaff ich mit meinem Auto. Da hab ich jetzt so viel Scheiß rausgeräumt, das wiegt jetzt nix m… https://t.co/Qdg9ucmGIQ	NOT	NONE	hasoc_2020_de_933
1132596528424656896	Einfach nur: #GehtWaehlen!	NOT	NONE	hasoc_2020_de_221
1130863081301643266	RT @DerRiccardo: Das muss so eine Art „Sport“ bei der #Linken in Brandenburg sein. #GehtWaehlen #Brandenburg https://t.co/NqcSRM9f5T	NOT	NONE	hasoc_2020_de_2540
1134170176755294208	RT @der_klauer: @tacoskrt68 @shahbabrarya Is nie im leben deins du hurensohn	HOF	PRFN	hasoc_2020_de_2586
1133695087974715392	RT @welt: CDU-Debatte nach Rezo-Video: Jetzt mischt sich Merkel ein https://t.co/BHUddmNbgL https://t.co/neMZy9XvAI	NOT	NONE	hasoc_2020_de_818
1132607811102359552	RT @Sir_Schnee: Ein Wähler* der #Grünen auf dem Weg zur #Europawahl2019 ? 🤣 #NoGrüne #NoEu https://t.co/aTY1jYaaCc	NOT	NONE	hasoc_2020_de_1412
1126205713586507776	Einfach nijazi dieser typ der im flixbus sich einen runtergeholt hat	NOT	NONE	hasoc_2020_de_141
1125143938099290112	RT @LeoBietton: @Hartes_Geld Früher waren alle, die dem Führer folgten Nazis. Heute sind alle Nazis die der Führerin nicht folgen wollen.	HOF	OFFN	hasoc_2020_de_3136
1134161142237020160	Waren das noch Zeiten, als wir richtige Bahnhofbuffets hatten! Jetzt ist in Solothurn ab 20h tote Hose... Deutsche… https://t.co/ByfKOUYMxW	NOT	NONE	hasoc_2020_de_901
1133862914622935041	RT @Ungebeten1: Und Zöpfe, du Vollpfosten! Dicke, fette, völkische Zöpfe, du Intelligenzallergiker! Jetzt habe ich mich geoutet. Ist denn v…	HOF	OFFN	hasoc_2020_de_1800
1128827992447377409	@CASPERxOFFICIAL ist ab jetzt nicht nur Emorapper, sondern linksextremer Emorapper ☝️ #WirSindMehr	NOT	NONE	hasoc_2020_de_826
1133333970974846976	Scheiß Dürre. https://t.co/A7Vm9vWxMk	NOT	NONE	hasoc_2020_de_3054
1134163507811880961	Ficken versaut sex porno blasen. Dicke geile frauen, kostenlose deutsche porno korsett. https://t.co/w0FmL6Gimv	HOF	PRFN	hasoc_2020_de_1458
1131561827182292994	purnu gratis deutsch porno wnsche www kostenlose erotik geile arsch fick https://t.co/Oxk6sqTRWr	NOT	NONE	hasoc_2020_de_1264
1133775983499272192	LED Arbeitsscheinwerfer LY8012 12V 24V eckig schwarz 34.99 EUR new Lampen &gt; LED Beleuchtung &gt; Arbeitsscheinwe… https://t.co/UGEAWH6L6L	NOT	NONE	hasoc_2020_de_2176
1131601622747029504	Merkel zockt das deutsche Volk ab https://t.co/EqG8zok6E8 via @wordpressdotcom	NOT	NONE	hasoc_2020_de_2698
1132083955107278848	Sex emma starr blanke fötzchen aleska diamond, fett weiber dessous schwarz erotische geile frauen. https://t.co/M74Mqrir72	HOF	PRFN	hasoc_2020_de_2957
1131973552658366464	RT @VzVhdS_deutsch: "Bin Nationalromantiker" – das "I didn't inhale" der Rechtsextremen und Nazis.	NOT	NONE	hasoc_2020_de_741
1134027293628624896	@zeitonline Ja er hat sich genug unbeliebt gemacht. Und noch was Islam gehört zu Deutschland! https://t.co/s4fhBvSmoz	NOT	NONE	hasoc_2020_de_232
1131192464193261569	@HeikoMaas NICHT VERGESSEN daß SOZIS &amp; MERKEL bedingungslose Willkommenpolitik woll(t)en u. praktizier(t)en. https://t.co/fHzHEOjsTV	NOT	NONE	hasoc_2020_de_851
1129851746552041473	@tagesschau Dummes Propagandageschwafel.	HOF	OFFN	hasoc_2020_de_3208
1123952260810145793	RT @Europarl_DE: Die Zeit läuft! ⏰ Vergiss nicht, dich als Expat ins deutsche Wählerverzeichnis für die Europawahl 🇪🇺 einzutragen!	NOT	NONE	hasoc_2020_de_1860
1134196143720738816	Mpse frauen, xxx in deutsch. Fette frauen de, videis pirno gratis! https://t.co/VC87eAtwUq	HOF	PRFN	hasoc_2020_de_1347
1124414783497940994	@OzraeliAvi Because Merkel told Zuckerberg🙄	NOT	NONE	hasoc_2020_de_1558
1124469888272216065	@bineuerboss @shoutoutxobella Würde Arsch geben	HOF	PRFN	hasoc_2020_de_996
1125756440696717312	@mjungclaus GRÜNE = Umweltschänder https://t.co/Dj8ZLmXtMP und 2.#Beweis der #Grünen-#SPD Klimaschutz-#Lüge:… https://t.co/eV1E1PLq0F	HOF	HATE	hasoc_2020_de_136
1124780195477622790	vallah billah ich bin nicht so eine 2 minuten später postet sie bild wo sie arsch für likes präsentiert hahaha	HOF	PRFN	hasoc_2020_de_2345
1131793931585380352	@BILD CDU lebt hinter dem Mond! Aber von Zukunft dumm daherreden! Die Original-Populisten!	NOT	NONE	hasoc_2020_de_162
1131221790775283712	@OnryouYuurei Ich hatte es grade auch im Kopf 🙈🙈🙈	NOT	NONE	hasoc_2020_de_1085
1126068874401734656	RT @HolDuDieLadio: Sie soll es der Merkel und GroKo sagen..... da sitzen die Lobbyisten der Autobauer, die das ganze System manipulieren...…	NOT	NONE	hasoc_2020_de_927
1125084664207687680	RT @SM100d: Deutsche Demokratie Deutschland 2019 https://t.co/ul8HQ9obZL	NOT	NONE	hasoc_2020_de_3121
1125322258937892864	@HeikoMaas @SawsanChebli Das A....Loch meldet sich zu Wort, der die ZENSIERUNG der Medien eingeleitet hat. Abartiger Lügner	HOF	OFFN	hasoc_2020_de_267
1125796139800907776	@ZDFheute Deutsche Neider und ihre Komplexe mit der Türkei...	NOT	NONE	hasoc_2020_de_610
1125333562557911040	@aryeshalicar @SPIEGELONLINE Das hat System! Die meisten (linken) Regierungen unterstützen ideel und finanziell P… https://t.co/WRqM6zijx4	HOF	HATE	hasoc_2020_de_468
1126189963949813760	Merkel und ihre Günstlinge, die diese Verbrecher zu Hauf zu uns einladen, müssen für jedes dieser Opfer zur Rechens… https://t.co/h4RRsh3EDj	HOF	HATE	hasoc_2020_de_580
1131202803140124672	in 🇱🇻 ballern jetzt einfach alle alle pointen raus wo irgendwie gibt https://t.co/vC93rfQ37Z	NOT	NONE	hasoc_2020_de_758
1133028533368963074	@Moewennase Es gibt nichts, was man mit einem scharfen Skalpell nicht verunstalten könnte. 😎😇 Halt mal kurz still.... 🔪	NOT	NONE	hasoc_2020_de_3060
1129110940195184643	@LuuucaBy Nicht eher 'Schon' ?	NOT	NONE	hasoc_2020_de_3337
1128186633008951296	RT @tagesschau: Von Qualzucht sprechen Tiermediziner und Wissenschaftler. #Milchkühe in Deutschland sind auf maximalen Ertrag getrimmt und…	NOT	NONE	hasoc_2020_de_1607
1131869278058291201	@JezAbiii Fuck mich nicht ab einfach heute nicht	NOT	NONE	hasoc_2020_de_3119
1134408329340608513	@MichaeLaGrasser War entspannter . Schon eher Feierabend bekommen 😅👍😊🌞☕☕☕	NOT	NONE	hasoc_2020_de_1111
1130280953841102850	@Ralf_Stegner Und warum mischt sich die dicke Nahles in die Innenpolitik eines souveränen Landes ein? Deutsche Poli… https://t.co/mHnuudpVRt	HOF	OFFN	hasoc_2020_de_3111
1130845326825336834	RT @Glubb_Fan: Geiler Scheiß #MASCHINIA2024 #fcn #Mathenia	HOF	PRFN	hasoc_2020_de_2017
1134409432434130944	RT @Kranzschwinger: Wer erinnert sich nicht an die Türkinnen und Araberinnen, die ab 1945 Deutschland wieder aufbauten. Die erste deutsche…	NOT	NONE	hasoc_2020_de_942
1126966904239853568	@Nora50Moya Dieses Bild ist einfach nur widerlich!Da sieht man mal was diese Frau so alles für Ihre Karriere macht!… https://t.co/c6dnFoTxgo	NOT	NONE	hasoc_2020_de_1013
1133114579515596800	@SoziaI 90% der Frauen sagen das... stimmt halt nur nicht 😂	NOT	NONE	hasoc_2020_de_3218
1133087463348613120	@rantingronja Eure scheiß Witze über Agumon lasse ich so nicht durchgehen!	HOF	PRFN	hasoc_2020_de_1933
1131220998051831808	@KrahMax ...für dumm genug.🤣😎	NOT	NONE	hasoc_2020_de_905
1130168336812249088	Es ist schon bemerkenswert, wie der Vaterlandsverräter Strache unter seinem "Jetzt erst recht"-Post von den ganzen… https://t.co/U3Bdp5Yjyf	NOT	NONE	hasoc_2020_de_206
1133130958247481344	Checkt den mal ab hat aufjedenfall Potenzial! https://t.co/X8DvevBQRE	NOT	NONE	hasoc_2020_de_2014
1132587384837681152	Hahah ich kann jz zum Wahlbüro laufen weil ich zu meinem Vater gesagt hab dass er dumm ist	NOT	NONE	hasoc_2020_de_1321
1132899722077847552	@welt_empfaenger @Weltspiegel_ARD @tagesschau Du Rassist.	NOT	NONE	hasoc_2020_de_3023
1130912288901337089	pelixulas porno gratis bokep gratis info deutsche porno stars frauen kostenlose porno download https://t.co/xnvua7ZDGL	HOF	PRFN	hasoc_2020_de_50
1128959039243788289	@CamilleLotheZH Nur werden die linken Medien diese nicht führen wollen.	NOT	NONE	hasoc_2020_de_66
1131314078025228289	Lak warum gönnst du nicht du hurensohn 😔😔🥺	HOF	OFFN	hasoc_2020_de_2510
1124246856144445441	@MuratSerin69 @yooli_derechte Scheiß Kanacke!	HOF	OFFN	hasoc_2020_de_595
1130835537315663873	@That_Deli Ich finds kinda dumm deutschrap so zu verallgemeinern. Es gibt so viele verscheiede Arten, aber es sind… https://t.co/zrSTPQIhhY	NOT	NONE	hasoc_2020_de_460
1132566203610927105	was für ein geiler Arsch klar will ich den Ficken herkommen	HOF	PRFN	hasoc_2020_de_2247
1131112143284330496	Bei einem gewagten Abstoß passt Rummenigge kurz vor der 50. Minute die Pille ins mittlere Feld zu Gauland der das D… https://t.co/fegfou0wMS	NOT	NONE	hasoc_2020_de_2031
1125679903037370368	@stromkasteriks Hauptsache es wird arsch geschlemmert	HOF	PRFN	hasoc_2020_de_150
1129379698574630912	kafeel ---&gt; kafeer ---&gt; kafir	NOT	NONE	hasoc_2020_de_1230
1128299761772257280	@mitzat Halt dein Maul.	HOF	OFFN	hasoc_2020_de_330
1130762774550843392	RT @BlackboxVS: Wenn die Leichtmatrosen bei der Wasserschutzpolizei angestrengt aufs Wasser schauen, machen die Nazis Landgewinne. https://…	NOT	NONE	hasoc_2020_de_507
1129300765997195265	RT @bigfrager: Barley sollte sich erst mal die Prozentzahl der Übergriffe auf Juden ansehen! Ca. 80 % werden von Moslems gemacht. Ist das s…	NOT	NONE	hasoc_2020_de_3147
1133228979148775424	@SawsanChebli Passen Sie auf die Leute die sie nicht mögen als Nazi zu bezeichnen. Hoffentlich zeigt sie jemand an.… https://t.co/PbHhAjh3x3	NOT	NONE	hasoc_2020_de_3217
1128011709556432896	Ich hab mal mega liebevoll zu meiner Mum gesagt, dass ich mir wünsche, genug Geld zu verdienen, sodass ich ihr neue… https://t.co/j6QK7aFEYU	NOT	NONE	hasoc_2020_de_605
1130338378094993408	RT @ArasBacho: AfD-Wähler: " Wir sind keine Nazis" Fühlen sich aber bei #NazisRaus angesprochen, und verharmlosen Nazis. Nie wieder Nat…	NOT	NONE	hasoc_2020_de_1926
1131637777630736385	@ak_hipp @regsprecher 70y #Grundgesetz. #Juhuu. (Germany ist am Arsch, merkt Iht das nicht???)	NOT	NONE	hasoc_2020_de_2737
1127875956713115648	@lonelyUmut Stimmt schon eigentlich	NOT	NONE	hasoc_2020_de_955
1125290768086839297	RT @ironicguerreiro: Brandt -&gt; Dortmund €25m Demirbay -&gt; Leverkusen €28m https://t.co/O10q90tRX4	NOT	NONE	hasoc_2020_de_1182
1133311095249092608	Flüge nach Manila (Philippinen) hin und zurück von München (September - Oktober) ab 387€ https://t.co/YPpK3ttebf	NOT	NONE	hasoc_2020_de_1542
1133477873355038720	RT @GolinehAtai: Erinnert mich an Merkels allererste Kennzeichnung der #FridaysForFuture Bewegung als „asymmetrische Kriegsführung“. Solch…	NOT	NONE	hasoc_2020_de_3202
1134110890276597760	Zurück ins Jugendzimmer https://t.co/BtBtk4z5qr	NOT	NONE	hasoc_2020_de_482
1133848712709644288	Als satiriker war er mal interessant. Als politiker wirkt er nur noch dumm. Schuster bleib bei deinen leisten. Furc… https://t.co/hVjZcw0qN1	NOT	NONE	hasoc_2020_de_965
1130756243998564358	RT @Karl_Lauterbach: Kinder in den Konflikt mit ihren Eltern zu zwingen ist unehrenhaft. Die Kinder machen mit dem Kopftuch kein politische…	NOT	NONE	hasoc_2020_de_1639
1133085462644625412	@RikeRaven @Volksverpetzer Das könnte man manchen hier an den Kopf hauen und die würden einen noch angrinsen und sagen "Stimmt und gerne"	NOT	NONE	hasoc_2020_de_3366
1133611436742254597	Der deutsche Bildungs-Skandal: "Deutschland verdummt, Lehrer tragen Maulkorb" https://t.co/sOxyAGTWcO via @China_Welt_News	NOT	NONE	hasoc_2020_de_847
1131070879721545735	Hab heute Bundesjugendspiele. Der dämlichste Scheiß meiner Schullaufbahn.	HOF	PRFN	hasoc_2020_de_2662
1132365942372093957	@lowcarbrudi @sehrtrocken DU DRECKIGER HURENSOHN ICH NEHM DIR DEINEN JOB UND DEINE FRAU MIT MEINEM MEHIKANER PIMMEL… https://t.co/NaohMcdsqf	HOF	OFFN	hasoc_2020_de_2086
1126256678540914688	@DieHumanisten @sixtus @dieLinke @Attacd Hört einfach auf, es wird nicht besser.	NOT	NONE	hasoc_2020_de_2669
1133211262421274625	RT @ranzmann: #Direktflug Merkels #Fachkräfte und Sofort-und #Dauerrentner bei Anreise an die deutsche Geldbörse https://t.co/PtZk1o4tSY	NOT	NONE	hasoc_2020_de_3430
1127122760386383872	@zerbrxsler @GPRealomon @ZDFheute @ARDde @ZDF Haben Sie eigentlich schon mal an fachkundige Hilfe ihres Psychiaters gedacht???	HOF	HATE	hasoc_2020_de_439
1131507397724385280	geile indische frauen cognata porno gratis porno mit deutscher ttowierten deutsche mutter hd https://t.co/r9u3Ud05km	NOT	NONE	hasoc_2020_de_3334
1125515205306454016	@Deanfan123Urban Man kann die Hashtags ja auch einfach muten.. aber so? Glaube manche Leute haben einfach zu viel Zeit	NOT	NONE	hasoc_2020_de_2547
1131237813020778496	RT @Moormoewe: Es gibt ja so Frauen, deren Make Up sitzt auch morgens um drei nach dem Kotzen im Club noch absolut perfekt. Und dann gibt…	NOT	NONE	hasoc_2020_de_1078
1125493856299036672	RT @peppermind: @DerSPIEGEL #Relotiuspresse, halt die Fresse! #Relotiuspresse, halt die Fresse! #Relotiuspresse, halt die Fresse! #Re…	HOF	OFFN	hasoc_2020_de_444
1123638396851822593	Kann mein Kater aufhören mir seinen Arsch ins Gesicht zu strecken? :((	HOF	PRFN	hasoc_2020_de_2647
1133707595368280064	@badrepuwhy SAME EINFACH 😭😭😂😂😂	NOT	NONE	hasoc_2020_de_934
1125046990952333312	Kosummoralisten, Heuchler und Faschisten! Kosummoralisten, Heuchler und Faschisten! Kosummoralisten, Heuchler und F… https://t.co/yoZi1gatlF	NOT	NONE	hasoc_2020_de_1549
1125036920428531715	https://t.co/JQvlVLegh7 Grundrente für jeden , Auch für faulenzer, Flüchtlinge und Asylanten . Weswegen Arbeiten wir eigentlich noch?? .	HOF	HATE	hasoc_2020_de_107
1128677781817167872	RT @BoserEr: @maxotte_says Merkel muss weg.	NOT	NONE	hasoc_2020_de_2679
1131123413370712069	@DieTagespost Die deutsche (National-)Kirche IST eine Glückskeks-Fabrik!	NOT	NONE	hasoc_2020_de_1700
1132369985681203203	Wie man einfach an den Titeln vom neuen HWSQ-Video schon erkennt, dass alle wieder @Gronkh hassen werden.	NOT	NONE	hasoc_2020_de_2114
1128982363785048066	heimlich ficken deutsche blondine fickt frauen virgin https://t.co/kjS22CZwrr	HOF	PRFN	hasoc_2020_de_275
1123594109208412161	@Batu_0699 @Kippo2o Digga ich hab die ganze Zeit, nicht einmal Hurensohn zu dir gesagt, weil ein Mann sowas nicht t… https://t.co/xhU7dx6kQA	HOF	PRFN	hasoc_2020_de_2761
1133398026381398017	Wtf. Lange nicht mehr so etwas dummes von Nintendo gehört.	NOT	NONE	hasoc_2020_de_840
1133039186896990208	RT @bimbas_world: Warum fragt denn die Bild so blöd, warum Merkel schweigt zum Wahl-Desaster? Die Chefin der CDU ist AKK, nicht Merkel.	NOT	NONE	hasoc_2020_de_651
1126235790911078401	RT @ZDF: Zwar wird immer mehr Geld ins #Pflegesystem gepumpt, doch die Berichte über Missstände in den Heimen ebben nicht ab. Wie kann das…	NOT	NONE	hasoc_2020_de_2420
1125068281239547904	@HeikoMaas @SawsanChebli Naja, hat eben bei einer Sozialistin angeschlagen... Wenn schon Filter, dann für alle Faschisten😂	NOT	NONE	hasoc_2020_de_2585
1123554816951758848	RT @Korallenherz: 13:38 So, auch ich habe den Startpunkt der Nazis erreicht. Aktuell erst 50 Nazis versammelt. #du0105 https://t.co/I1wGKGL…	NOT	NONE	hasoc_2020_de_3438
1124990934066843649	RT @uedio: Dass Sigmar Gabriel als Bundestagsabgeordneter eine Art Kolumne in mehreren Tageszeitungen hat, für die er auch noch mit einem H…	NOT	NONE	hasoc_2020_de_1806
1134200564504563715	#Merkel bekommt Ehrendoktor. #Harvard Aber es ist ja nicht so, dass #Trump leer ausgegangen ist: https://t.co/RuUDcBIyEk	NOT	NONE	hasoc_2020_de_860
1127230189111586816	Diese scheiß Ultras....	HOF	HATE	hasoc_2020_de_1715
1123595996632690690	Ich sollte echt mal was essen.	NOT	NONE	hasoc_2020_de_79
1131607570265845760	Du meine Güte @digitec_de! Ich habe doch schon mehr als genug iPads! Bringt mich nicht auf dumme Ideen 😂😂😂 https://t.co/J57pCpstrE	NOT	NONE	hasoc_2020_de_259
1127898727606292480	@KaiserTrajan87 ist einfach nicht mehr so meins °^°	NOT	NONE	hasoc_2020_de_2335
1131488456230801409	@EinGereusch @bbyfrkmcgzx @grknzrstrr ja naja ich zock halt gerne auch mal :D und linux ist da mittlerweile echt am… https://t.co/doRHKl4yHH	NOT	NONE	hasoc_2020_de_1663
1133269923956973568	@reitschuster Sind halt empfindliche Idioten, die schon Widerspruch zur eigenen Meinung als so schlimm empfinden, d… https://t.co/ddtiPqm2PE	NOT	NONE	hasoc_2020_de_2189
1131530608994336768	RT @Herzblutbluete: Rock'n'Roll im Kopf Punk im Herzen Blues in der Seele Samba im Arsch Ich bin Musik.	NOT	NONE	hasoc_2020_de_373
1124362556020330501	RT @EnricoTokarEU: Mich ekelt dieses Nazispack einfach nur an. Es ist eine Schande, dass diese Faschisten in unserem Land wieder derartig a…	HOF	HATE	hasoc_2020_de_630
1132736626558414849	62% scheiße was soll denn das	HOF	PRFN	hasoc_2020_de_324
1124590520645214208	Rohstoffbrief: #Fresnillo, der größte #Silberproduzent der Welt, lieferte schwache Q1-Zahlen ab. Die Analysten glau… https://t.co/lJhysxdV81	NOT	NONE	hasoc_2020_de_1217
1127595378763804673	@HSV @SCPaderborn07 Titz zurück!!!	NOT	NONE	hasoc_2020_de_1436
1127139516639272960	@_keentech_ Kopf hoch das wird schon,	NOT	NONE	hasoc_2020_de_3150
1126334193489858561	RT @GodCoder: @MalteKaufmann @MartinHolubek3 @HeikoMaas @SawsanChebli Heil leise, Fascho. Dein Game war schon 1945 over.	HOF	OFFN	hasoc_2020_de_2149
1125735066519384064	@ImmerGeil82 Was ein geiler Arsch 😍	HOF	PRFN	hasoc_2020_de_366
1133474635356491776	@lehrbuda @EDreisvogt @moritur_et_ride @PIRATEN_Saar @rezomusik Es ist einfach aus der Ferne so etwas rauszuhauen u… https://t.co/4ZpqDryNdk	NOT	NONE	hasoc_2020_de_3185
1129498028283445248	@ADHS_Roman @Priiizzyy Du hurensohn. Ich sag dir jetzt mal was du hurensohn Ich hab deine Mutter gefickt du hurenso… https://t.co/GazYnTwKUH	HOF	PRFN	hasoc_2020_de_576
1123614023755321344	@jeonpokpok hEnLoOOoo oOmF h3h3 :"&gt;	NOT	NONE	hasoc_2020_de_1488
1128339133699690496	@derpsichologe @Burhan____ diggi du denkst mehr an fasten als alle moslems hier zusammen was los	NOT	NONE	hasoc_2020_de_3381
1132298120472272897	@tagesschau Eine widerliche Verlogenheit des Herren Herrmann! Man kann zwar #Kippa tragen, aber wenn die Kameras au… https://t.co/5lT4p3aUnB	NOT	NONE	hasoc_2020_de_1748
1132712970692255745	@MzudemOffiziell Willkommen zurück??	NOT	NONE	hasoc_2020_de_365
1130919305972002821	@KevinNeuwirth über wen man keine Witze mehr machen darf, der ist wirklich am Arsch	NOT	NONE	hasoc_2020_de_2595
1134005013485932545	Ich würde uns so hassen wenn ich mit uns im Abteil sitzen würde	NOT	NONE	hasoc_2020_de_370
1125873302394818562	@csu_bt Was soll der Scheiss?	NOT	NONE	hasoc_2020_de_27
1133810200635412482	RT @InDampf: @NanuNan32440900 @Chinationalist9 Diebe = Hände ab, Scheidung/ Fremdgehen = Steinigung, Hassrede gegen Islam = Köpfen, Homosex…	NOT	NONE	hasoc_2020_de_2497
1125188238325493761	@davescustomxxx @HeideeNytes @BellaInksClips Das ist ja mal geil wie sie dir dein geilen arsch versohlt	HOF	PRFN	hasoc_2020_de_1142
1131540750821466113	@WELTnews Die Merkel soll "Flinten-Uschi" rausschmeissen, dann wird alles wieder vernünftig geregelt!!	NOT	NONE	hasoc_2020_de_2401
1127661229336559618	@welt Eine deutsche Frau, die von einem für sie traumatisch empfundenen Erlebnis berichtet. Was will man mit solchen Nachrichten bezwecken?	NOT	NONE	hasoc_2020_de_1373
1131607519938449408	Ich hab die Fahrschule letzte Zeit echt vernachlässigt (hatte aber den Kopf auch mit anderem voll) Also gehts heu… https://t.co/GwaAdsSXGV	NOT	NONE	hasoc_2020_de_1817
1129955593316425728	@tagesschau Meine Fresse, was für ein Theater	HOF	PRFN	hasoc_2020_de_3357
1134148651616546817	Frau Merkel, handeln Sie! https://t.co/lv959vDff5	NOT	NONE	hasoc_2020_de_93
1133633473636384769	@Museumsdoerfer @SPIEGELONLINE Natürlich wird Merkel den kleinen Weber fallenlassen wie eine heiße Kartoffel, sobal… https://t.co/YOVvhCUprQ	HOF	OFFN	hasoc_2020_de_3153
1127680275658551296	RT @sensusnoctis: @lostboislim fass an ihr arsch und du drippst	HOF	PRFN	hasoc_2020_de_1041
1128405214963412993	RT @LoveBeatsHB: Aber die Linken mimimimi !!!1!!! #AfD #noAfD #NazisRaus #FCKAFD https://t.co/OssMdaaucG	HOF	HATE	hasoc_2020_de_1736
1131154065348550657	@franz_salzmann @tagesschau Als Minister benötigt man halt noch nicht mal einen Schulabschluss und Ahnung von dem A… https://t.co/AqXiFaIAqD	NOT	NONE	hasoc_2020_de_2598
1125458909362307073	Wenn Politiker Politik für den Arsch machen https://t.co/ZJ9Z9Rnopw https://t.co/EJAPKYaAtl	HOF	HATE	hasoc_2020_de_2705
1128626259007660032	Daniel+Kermit &gt; Red+Andy	NOT	NONE	hasoc_2020_de_381
1132980013643509762	@DerTheooo Aber Torwart auf offchem ist auch scheisse	HOF	PRFN	hasoc_2020_de_1880
1127578274400538624	@Rockstarleben Es ist schon viel besser als früher 😅☝️	NOT	NONE	hasoc_2020_de_1
1131252040083095553	RT @Linksfunk: @RosamWolfgang Jener Politiker der dieses Chaos wesentlich mitverursacht hat, soll jetzt auch noch mit einer ÖVP Alleinregie…	NOT	NONE	hasoc_2020_de_1123
1124378838342021124	@lola_barista okaaaay ich trau mich das jetzt einfach mal :D https://t.co/I5nYbS4Fjw	NOT	NONE	hasoc_2020_de_2115
1130129526892244992	@ThcAltan du bist ein fauler sack, zieh es doch einfach durch	HOF	OFFN	hasoc_2020_de_2323
1131878413260742661	😍🔥 Extrem alte Oma Moni zeigt hift ihrem Stief Enkel mit ersten Arsch Fick 😘👌 https://t.co/eoDHsFHI4o #NSFW #RT… https://t.co/F1pZMSbFX8	HOF	PRFN	hasoc_2020_de_2533
1132993854838321154	RT @K_Wehnemann: @Thomas_Bareiss Und deswegen haben die Grünen sich verdoppelt? Weil die Leute gegen CO2-Steuer sind?	NOT	NONE	hasoc_2020_de_908
1130730017015697408	Erst wenn der Mensch seine eigene Scheiße fressen muss, passiert was. Mich macht die derzeitige (nicht erst seit ge… https://t.co/qJTwbLjJr5	HOF	PRFN	hasoc_2020_de_3395
1128579375073460224	Deutsche plata o plomo https://t.co/n6hNyUjYOR	NOT	NONE	hasoc_2020_de_1479
1131362312558825473	RT @banana_fishxx: Angel Gabriel✨ https://t.co/BxoBej7PIc	NOT	NONE	hasoc_2020_de_423
1127501598308098049	Frankfurt-Helden versteigern ihre getragenen und signierten Europa League-Trikots für die Deutsche Sporthilfe / Die… https://t.co/kx1nhPJHmY	NOT	NONE	hasoc_2020_de_1898
1131631523948572672	Die @Tagesschau hat die Endphase das Wahlkampfs eröffnet.	NOT	NONE	hasoc_2020_de_1055
1134541414610718721	@EthopianM Zu geiler arsch	HOF	PRFN	hasoc_2020_de_3432
1129492714100318213	@kaufmannskrimis Absolut. Dieses kleinbürgerliche Imponiergehabe. Es ist so einfach.	NOT	NONE	hasoc_2020_de_2628
1124254594652090368	@yooli_derechte @triplepsn @MontanaBlack Lösch dich Hurensohn!	HOF	PRFN	hasoc_2020_de_2013
1130198846175424513	@HeikoMaas Naja mit linken hatten wir auch schon Pech #Honecker	NOT	NONE	hasoc_2020_de_2090
1127850199508975617	Mussolini einfach unhatebar	HOF	PRFN	hasoc_2020_de_1676
1127184743794188288	RT @OnkommD: Hey ihr people vom #abi2019 - wisst ihr schon genau, wie euer Leben nach dem Abi jetzt weitergeht? Haut mal raus https://t.co/…	NOT	NONE	hasoc_2020_de_2599
1124526960154238976	RT @oxensepp: @katjakipping Also Katja, ich wäre eher dafür, erstmal die Linke, genauer gesagt die SED zu enteignen. Wo habt ihr denn die K…	NOT	NONE	hasoc_2020_de_1108
1125098345997983744	RT @MWinteron: So, wie die Merkel - Regierung, incl. des größten Teils der sog. Opposition, Deutschland in die Scheiße geritten hat, müßte…	HOF	HATE	hasoc_2020_de_2757
1126757562357915648	OTS: KfW / KfW-ifo-Mittelstandsbarometer: Mittelständisches Geschäftsklima ... #tradesfeed -&gt; https://t.co/RWqfcilvbP	NOT	NONE	hasoc_2020_de_2124
1126766680774856704	Totale Unterwerfung – Dahlia Sky wird von einem Fremden in den Arsch gefickt! – Grobe Rollenspiele Fantasy Sex mit… https://t.co/YTOJ1GgsPI	HOF	PRFN	hasoc_2020_de_1172
1133384273258532867	@Domtendo Diesen Scheiß fixen https://t.co/IN8JU2Ww5j	NOT	NONE	hasoc_2020_de_1759
1133842610005663744	Die haben arsenal halt einfach gebummst	HOF	PRFN	hasoc_2020_de_3364
1128715652200652802	Ach du Scheisse, wie peinlich! Hätte sie mal die Haare zusammen gebunden, dann würde sie was sehen🙄 #dasperfektedinner	NOT	NONE	hasoc_2020_de_3031
1133354669873541125	RT @LukasDerRapper: Ich bin einfach mal im Intro bei Gewitter im Kopf NICE 💚💚 https://t.co/DjANWb7Dyk	NOT	NONE	hasoc_2020_de_3129
1133345547249770497	Benjamin Schulz - https://t.co/PkoQhBOaZy	NOT	NONE	hasoc_2020_de_189
1131260525185253376	Jessd sssollte Frau Tssservakis doch mal nach ihrer Sstzunge sssehen lassen. Das tststss wird ja immer schlimmer .… https://t.co/ypv4q1sNoM	NOT	NONE	hasoc_2020_de_1978
1130825324181303296	RT @nutellaflxke: liebeskummer ist so eine dumme drecksscheiße ich hab‘ so keine lust mehr	HOF	PRFN	hasoc_2020_de_2349
1131177285002911747	@AliCologne @gamergateblogde Islam ist ein Krebsgeschwür, das sich mithilfe der linken Politiker in Deutschland ausbreitet.	HOF	HATE	hasoc_2020_de_1197
1127485567678189568	RT @RealSHIRA: Grüne Heuchler https://t.co/OEUUxedlRM	HOF	HATE	hasoc_2020_de_2081
1125117027436384262	RT @_Naschkatze86_: Paradoxe deutsche Wörter : - Gefrierbrand - Holzeisenbahn - Wahlpflichtfach - Doppelhaushälfe - Selbsthilfegruppe	NOT	NONE	hasoc_2020_de_1819
1123980522034737161	@cem_oezdemir @ConstSchreiber Grüne Ökonazis raus	HOF	HATE	hasoc_2020_de_528
1132546100307660806	@IonBlackOut @NomadeX2 @SawsanChebli Sie ist einfach blond, das ist alles!	HOF	OFFN	hasoc_2020_de_1278
1126076097001676802	Manchen Leuten haben sie echt heftig ins Hirn geschissen (P. H. Allee) https://t.co/faMRdIqWij	HOF	PRFN	hasoc_2020_de_547
1123814595381145603	RT @AngelaUlrichrbb: Wir müssen schneller werden gegen die Terroristen, sagt #Merkel bei Treffen mit #G5Sahel-Präsidenten. #BurkinaFaso. Mo…	NOT	NONE	hasoc_2020_de_134
1125430752974450688	Hab mich jetzt auch als Trombozytenspender eintragen lassen! Bald hat die ganze Welt Bazi-DNA °^°	NOT	NONE	hasoc_2020_de_2654
1130034353940119554	@Miiiaa_C Schöner arsch	HOF	PRFN	hasoc_2020_de_3376
1128401402345115648	RT @Lu41598225: #frontal21 Es ist unglaublich, dass das Kopftuch, das ein eindeutiges Unterdrückungsmerkmal von Frauen darstellt, bei einem…	NOT	NONE	hasoc_2020_de_1797
1130851798623739905	@timolammert Keine Tribüne -&gt; kein Ground 🤷🏻‍♂️	NOT	NONE	hasoc_2020_de_2225
1133398294820982784	@biermitdir Gamescom einfach für die ganzen anime jungfrauen	NOT	NONE	hasoc_2020_de_3285
1124791234890014720	@SPORT1_Dopa @SPORT1 Es fehlt einfach ein Tuchel oder ein Nagelsmann dann schneiß den Aki raus irgendwie ist er auch nicht mehr der richtige	NOT	NONE	hasoc_2020_de_2770
1129348736231124993	die burger sehen aus wie ein göt und ich krieg dieses bild nichtmehr aus meinem kopf	NOT	NONE	hasoc_2020_de_561
1129642152970137600	@Schimpf_Bot Schnauze du Hurensohn amk	HOF	PRFN	hasoc_2020_de_3207
1131750512154615810	asiaticas peludas gratis deutsche 18 porno deutsche porno f porno gratis abspritzen https://t.co/vYle3Pa2Ll	NOT	NONE	hasoc_2020_de_737
1133149023131578368	RT @l_sauerwald: Man könnte sich auch über die Wahlergebnisse von Nazis echauffieren. Aber was weiß ich schon. #Europawahl2019 https://t.co…	NOT	NONE	hasoc_2020_de_10
1129124563256774657	RT @DrDavidBerger: Deutsche in der Minderheit an deutschen Schulen – Ministerin hilflos https://t.co/5nzX39B27a via @DrDavidBerger	NOT	NONE	hasoc_2020_de_1816
1127895049193148418	Rekomen username &gt; @cigsafterimsak.	NOT	NONE	hasoc_2020_de_3016
1128575428208267264	RT @FatalityBaerlis: @fladdermues @Fern_Schreiber @tibhubay Nanu? Noch kein Linker oder Antifant vorstellig gewesen, der panisch auf der Ta…	NOT	NONE	hasoc_2020_de_689
1129099296794730496	Hört ihr das HA!!!! ?😂	NOT	NONE	hasoc_2020_de_15
1128278081406427136	@_fakuum Die ist dumm das könnte ein Grund sein	NOT	NONE	hasoc_2020_de_102
1132960543671803905	Ist eigentlich Frau Merkel noch im Amt? 🤔 #EUWahl2019	NOT	NONE	hasoc_2020_de_512
1132783103678664704	Linke Aktivisten - die geduldeten Verbrecher https://t.co/Cpq8VT9qR9	HOF	HATE	hasoc_2020_de_2478
1129458345994313729	@Die_Gruenen Jetzt müssten die Grünen Politiker nurnoch zu ihren ursprünglichen Grundwerten zurückkehren, dann wäre… https://t.co/cEB3luyLlq	NOT	NONE	hasoc_2020_de_2089
1128726121174962176	Was geht ab ihr Pisser, warum interagiert man mit mir, wenn man Stress sucht aber jeden anderen scheiß den ich poste, wird gekonnt ignoriert	HOF	PRFN	hasoc_2020_de_2187
1129474800261488640	Meine scheiß MANDELN JUNGE	NOT	NONE	hasoc_2020_de_3329
1134059723962159104	RT @GioRap90: noch nie in meinem Leben herrentag mit Alkohol zelebriert, bin doch kein hurensohn	NOT	NONE	hasoc_2020_de_2709
1130899181701337088	schwarze deutsche frauen porno haarige geile omas geile omavotze putas peruanas gratis https://t.co/iz55Vq6sNJ	HOF	PRFN	hasoc_2020_de_3450
1134366541494005765	RT @ZDFheute: Klimaforscher Ottmar Edenhofer vom @PIK_Klima fordert, Deutschland müsse seine #CO2-Emissionen in den Griff bekommen. https:/…	NOT	NONE	hasoc_2020_de_1822
1127340956452380672	RT @tagesschau: Wahl in Istanbul: Imamoglu - ein Konkurrent für Erdogan https://t.co/XGEwan73NV #Türkei #Imamoglu	NOT	NONE	hasoc_2020_de_3172
1125729605548224512	@tagesschau Der käme ja in die DDR!	NOT	NONE	hasoc_2020_de_1728
1131613459060350976	@Pavle_HD @ToasterMatthi Am Arsch der Welt ist noch geiler. Da muss man fast keine Menschen sehen.	NOT	NONE	hasoc_2020_de_3250
1127547844691484673	@DieserButzi @wineslvt halt die fresse	HOF	PRFN	hasoc_2020_de_3234
1124207559718707200	@Zaubermaus57 Kopf hoch, das wird schon 👍❤️🍀🌷!	NOT	NONE	hasoc_2020_de_243
1125409089390034946	Imam warnt den Westen: „Hört auf uns. Wir gemäßigten Moslems können Euch bald nicht mehr helfen“ https://t.co/LuGGNvU3kA	NOT	NONE	hasoc_2020_de_701
1124930619967004673	@ofdarkhumor Mal den teufel nicht an die wand 😂	NOT	NONE	hasoc_2020_de_2504
1126123001907433477	@talita_kum76 Man ist nur so lange dumm, bis man merkt, dass die anderen auch nicht schlauer sind.	NOT	NONE	hasoc_2020_de_3062
1134152753612283906	@OStirboeck ...wie ist es eigentlich mit den Linken, Grünen und Sozialen Populisten, die enteignen, einschränken und "regulieren" wollen?	NOT	NONE	hasoc_2020_de_1152
1128998478309449728	RT @realHerrSammy: 🔔 MK-HOSTING ---&gt; V E R L O S U N G 🔔 🎁 1x #ROOTSERVER 🎁 2 Kerne, 3 GB RAM, 50 GB HDD Festplatten Speicher 🎁 LAUFZEIT:…	NOT	NONE	hasoc_2020_de_360
1126875636172193793	RT @MarleneSchfer1: In der Hölle sorgen die Linken für die Ordnung, vegane Grüne für die Küche und Merkel für den Humor. Der Satan selbst i…	HOF	HATE	hasoc_2020_de_2454
1133342913230974976	RT @DominaKristin: Die #Erziehung einer #Zofe im #Nylonkittel mit Schlägen auf den nackten Arsch bewirkt erstaunliche #Wunder. #Brav wie ei…	HOF	PRFN	hasoc_2020_de_2948
1130316815178117120	RT @l800mph: Deutsche Flagged Trump, Kushner for Money Laundering: Report https://t.co/bA76a793lm	NOT	NONE	hasoc_2020_de_834
1132702187153502208	RT @BStarkimarm: Putzig, wenn sich Leute echauffieren, daß @DiePARTEI gewählt wird. DANN MACHT SIE HALT ÜBERFLÜSSIG, INDEM IHR NICHT MEHR…	NOT	NONE	hasoc_2020_de_1666
1124987167602872321	RT @Ungebeten1: Der "Bundesfrauenrat" der Grünen... Sicher, dass das alles Frauen sind? https://t.co/AkTsWsYcWj	NOT	NONE	hasoc_2020_de_738
1129350653053161473	RT @froschdomse: "Lass das liegen Mia-Marie! Das ist Müll!" "Das ist Müll und da ist ein Mülleimer!" sprach die kleine Mia-Marie vor dem K…	NOT	NONE	hasoc_2020_de_765
1127227815122874369	@bundeswehrInfo Zum Glück bin ich da schon lange raus und muss diesen Schwachsinn nicht mehr ertragen. Es gab mal e… https://t.co/PbWylaG8V9	NOT	NONE	hasoc_2020_de_906
1126795055212179456	RT @Kristin_Brinker: Die Zukunft #Berlin|s wird von #Linken und #Grünen auf dem Altar kurzfristiger Wählerstimmen geopfert. #StarkeSchulden…	NOT	NONE	hasoc_2020_de_183
1129784356665479169	@OrenIShiKiddo @profraika und ich sage Ihm er wird sich Irren. Warum? Weil sich nur wenige deutsche Frauen auf Nege… https://t.co/lFHvK5eJk2	HOF	HATE	hasoc_2020_de_399
1124372110678401025	@NinaL1999 FICK DICH DOCH EINFACH D';	HOF	PRFN	hasoc_2020_de_1433
1131280745908064257	@jesus_frank So ist es. Aber da es eine Grüne von sich gab u noch dazu gegen Deutsche, wird es beklatscht.	NOT	NONE	hasoc_2020_de_470
1129439836518211584	Die haben echt noch keine Ahnung was sie erwartet... #dasperfekteDinner	NOT	NONE	hasoc_2020_de_2353
1129850429515403264	Du dumme hässliche kleine schlampe alter	HOF	PRFN	hasoc_2020_de_3107
1134372400924188672	RT @SPIEGELONLINE: Die Präsidentin der "Harvard Alumni Association" bedankte sich bei #Merkel nach ihrer umjubelten Rede – und sagt dann nu…	NOT	NONE	hasoc_2020_de_404
1129466898159198209	Willkommen zurück @MzudemOffiziell	NOT	NONE	hasoc_2020_de_2155
1127703377884921856	twitter lass mich gif posten du arsch	HOF	PRFN	hasoc_2020_de_1869
1124324211693182976	RT @Hagen_Rether: Dem weißen Mann geht der Arsch auf Grundeis, weil er merkt, dass er langsam in die Unterzahl kommt. So viel Grundeis gibt…	NOT	NONE	hasoc_2020_de_998
1131974655756124160	@MBU1959 Schon, aber letztendlich sind es die Hassprediger an der Spitze, die das Fußvolk aka Stimmvieh verhetzen und für dumm verkaufen.	NOT	NONE	hasoc_2020_de_936
1124986785912770560	RT @Maulwerker1: @NetReaper @MiataMuc @Kachelmann Die Grünen können nix, aber auch gaaarrrrnix 🤢 https://t.co/zhwCBxFIQQ	NOT	NONE	hasoc_2020_de_1017
1133100503418703874	@iParaadox Das ist einfach anders	NOT	NONE	hasoc_2020_de_1592
1128631866758762497	RT @krippmarie: Innenminister Matteo Salvini hatte während einer linken Störaktion im EU-Wahlkampf genug von den Faxen der linken Demonstra…	NOT	NONE	hasoc_2020_de_1528
1133062641444950021	RT @TuncayOezdamar: “Regulierung von Meinungsäußerungen” Wir Türken kennen das irgendwoher. https://t.co/CYF8JG3jK9	NOT	NONE	hasoc_2020_de_3411
1127083413620576256	RT @333Goltz: @AndreaSchlegel3 das stimmt, das ist auffällig bei den linken Gruppen RAF Antifa, Morde Brandstiftungen usw und den neuen…	NOT	NONE	hasoc_2020_de_1016
1130149630187061252	RT @haraldlaatsch: #Strache verspricht einer Frau im kurzen Rock, in freudiger Erwartung die Welt. #Merkel verursacht dutzende Tote, 100e…	NOT	NONE	hasoc_2020_de_598
1133766537930842112	@LPSebo haahahaha cüüüüüs das ist einfach mehr als dokkan damals bei Phy SV	NOT	NONE	hasoc_2020_de_3158
1125992638728101888	RT @maternus: Das werfe ich Frau Merkel und ihrer Claque am meisten vor: daß sie unser Land für kriminelle, fanatische und unverschämte Mig…	HOF	HATE	hasoc_2020_de_1764
1129843605387042816	@ZDFheute Ich fordere das die Merkel zurücktritt, und in ein islamisches Land auswandert.	NOT	NONE	hasoc_2020_de_87
1126762289304981505	@morgenpost Und nicht alle Grünen brauchen Freigang.	NOT	NONE	hasoc_2020_de_2236
1134334220212609024	RT @EventyrJ: @maxotte_says Mit der Einladung der alten #FDJ-Fuchtel 🤯#Merkel🤕, der schädlichsten Frau Europas, ist nun #Harvard zu einer "…	HOF	OFFN	hasoc_2020_de_3308
1134105102128701440	Ohne Radtour ist so ein Eisbecher einfach zu groß. Ich hätte noch ein paar Mitesser gebraucht. Jetzt geht es halt zurück	NOT	NONE	hasoc_2020_de_1749
1132906407802671104	RT -&gt; IHelzer_:https://t.co/2AfIFnxX8i	NOT	NONE	hasoc_2020_de_1246
1133063048292392960	@Thomas_Bareiss @NiemaMovassat Als ob Politiker ihr eigenes geld verdienen würden lul ihr lebt von meinem ... Und w… https://t.co/OVpuMA6rHu	NOT	NONE	hasoc_2020_de_265
1126058615125741568	Was für ein scheiß Wetter https://t.co/oEdcv0tbu9	HOF	PRFN	hasoc_2020_de_2800
1134569868769071106	RT @mehlprinzessin: Ich seh schon wieder so viel zum Thema Kopftuch. Deutschland in deinen Medien werden Frauen 24/7 sexualisiert und als L…	NOT	NONE	hasoc_2020_de_3354
1132729252992962560	Ist tinder eig useful oder komplett fürn arsch? Frag für nen Freund	NOT	NONE	hasoc_2020_de_808
1128902718146449408	@tagesschau @WDR Seehofer Pläne taugen nichts. Man sollte zuerst Seehofer und Merkel abschieben. Danach kann man in… https://t.co/KfjgnMPHYb	HOF	OFFN	hasoc_2020_de_876
1126355144042524673	Frauen: Wir wollen das Patriarchat stürzen und ein Ende der chauvinistischen Rollenbilder! Ebenfalls Frauen: Du bi… https://t.co/7cY18q7YPr	NOT	NONE	hasoc_2020_de_696
1125770680367185921	@Monitorex_fotos @maximariegoldt so ein scheiß, erst nehmen uns die Autos die Straßen und jetzt sollen wir nach ein… https://t.co/Ko8Lka6T1R	NOT	NONE	hasoc_2020_de_508
1129839364958248961	RT @Herr_Wirt: Lange nichts mehr von ihr gehört, insbesondere nicht, als Kollektiv-Kevin die DDR herbeiredete. Jetzt aber meldet sie sich e…	NOT	NONE	hasoc_2020_de_1745
1133782702765817856	Bewege deinen Arsch endlich her! - Bigfoot 3.0 https://t.co/zWtmr2zrUJ	HOF	PRFN	hasoc_2020_de_1601
1134381125093212160	RT @amkrpinfo: fav und retweete einfach, wenn du da bist.	NOT	NONE	hasoc_2020_de_2859
1127887306512326657	Mir sind jetzt schon 4 Laufgruppen entgegen gekommen, ich möchte auch so was würde mehr bock machen zusammen	NOT	NONE	hasoc_2020_de_953
1127855958292668416	@ChristianHelms Dumm hat seine Aufgabe tatsächlich noch erledigt bekommen. Aber ich habe die Dummheit von Dümmer mal wieder unterschätzt.	NOT	NONE	hasoc_2020_de_3307
1129483092400304128	Was soll er denn machen der Bub? Sebastian ist da einfach so reingeraten.	NOT	NONE	hasoc_2020_de_940
1124966720354045952	@tagesschau Hoffentlich bald	NOT	NONE	hasoc_2020_de_207
1134075947550990336	RT @BigDaddyTom143: @Vor8Viertel @Dealo_RU Jaa alles was er macht ist ein Hurensohn	HOF	PRFN	hasoc_2020_de_377
1124391953926381568	niemand: Personen im Kdrama zu der Person mit der sie so oder so am Ende zusammen kommen: "O mG dU bisT sO duMm w… https://t.co/jIjoOhqGqG	NOT	NONE	hasoc_2020_de_2002
1133121160374304768	RT @pikachumagbier: Ich will meinen arsch ficken https://t.co/IV5sYYYiM2	HOF	PRFN	hasoc_2020_de_2591
1124251792840318976	@annalist Diente nur zur Verdeutlichung. Wenn Sorgearbeit mitgezählt wird, gibt es bestimmt schon wieder mehr Leute… https://t.co/6tKK1Ha1nX	NOT	NONE	hasoc_2020_de_2394
1133055192365187072	RT @christophaviv: @beyenburgerin @IreneKellner @Saefken Merkels Mädchen	NOT	NONE	hasoc_2020_de_237
1125484633037201414	@CharlotteMacht @florianklenk @heutejournal @_vanessavu Einmal die Linken, dann die Rechten, dann wieder die Linken usw usw	NOT	NONE	hasoc_2020_de_1370
1130941548340961280	RT @bodoramelow: Ich kann es einfach nicht glauben! Seifenkistenrennen absagen für Kinder und Nazis marschieren lassen? Mehr Platz für Kin…	NOT	NONE	hasoc_2020_de_1132
1133438081959440384	RT @SPIEGEL_Wissen: Welterbe Selous-Reservat: "1500 Quadratkilometer sollen abgeholzt werden - da passen mehrere deutsche Nationalparks rei…	NOT	NONE	hasoc_2020_de_1071
1126045453404053505	RT @joleffers: Pack die Badehose ein: Heute vor 112 Jahren eröffnete das Berliner Strandbad Wannsee (aus dem @einestages-Archiv) https://t.…	NOT	NONE	hasoc_2020_de_253
1126182087059488768	RT @AndreasAndy3131: Türkei: »Erdogan wird noch schwächer dastehen« (https://t.co/tmQKDtRvsw) https://t.co/sGKLbovuqt	NOT	NONE	hasoc_2020_de_270
1126193009039683586	Genauso lehrt es der Islam, warum also die Aufregung. Da muss man einfach nur konseq. vorgehen. Hier bleiben darf n… https://t.co/gVMUoGkEQk	NOT	NONE	hasoc_2020_de_1429
1129820733868335104	Oh ne, Barbara Schöneurgghhh macht den scheiß immer noch? fml	HOF	PRFN	hasoc_2020_de_573
1131674108721324032	@verblasste Merle ich sehe einfach SO EDGY aus	NOT	NONE	hasoc_2020_de_2904
1128424009647812608	RT @NHausfrauen: https://t.co/hvoKCVZLsW Sahne Arsch https://t.co/scGspzc7nm	HOF	PRFN	hasoc_2020_de_2985
1124246117942812674	RT @wtrappmann: @HeikoMaas Als ein deutscher Journalist im venezuelanischen Knst saß, hat das den Herrn Maas nicht sehr interessiert. Es is…	NOT	NONE	hasoc_2020_de_2456
1133749400004640768	@OmarHedeya @e_bo30 @SawsanChebli Kommen Sie nicht mit dem Opfermythos. Sie waren Alliierte der Nazis.	NOT	NONE	hasoc_2020_de_1979
1131126462617137153	@tantepiep Bring mich nicht auf dumme Ideen. https://t.co/z0GN0Izw4F	NOT	NONE	hasoc_2020_de_2095
1124706631575535617	@AfD_Hamburg Boah seid ihr dumm! Scheiß Afd scheiß nazis! Verpisst euch einfach!	HOF	HATE	hasoc_2020_de_1361
1129796121667153920	Ich fühl mich so..keine Ahnung.. einfach nur scheiße. lol. x__x tabatabayi	NOT	NONE	hasoc_2020_de_2488
1129714538276904960	RT @CapYossarian: @WELTnews Der deutsche Verfassungschutz ist ein Inlandsgeheimdienst. Was soll das? Reicht es nicht dass er schon als Waf…	NOT	NONE	hasoc_2020_de_1747
1132679068137209856	RT @Florian161_Punk: LifeHack gegen Nazis: #ReconquistaInternet https://t.co/phZPTcLUp9	NOT	NONE	hasoc_2020_de_2627
1131569125275373569	@Fern_Schreiber Dumm und Glücklich.	NOT	NONE	hasoc_2020_de_660
1130735729640910849	@GebtName Dumm wenn du jetzt alles hinschmeißt und aufgibst	NOT	NONE	hasoc_2020_de_1492
1130076674484252672	RT @ChrisVelten1: @Lebensformation Was soll das bitte für eine uns "bereichernde Kultur" sein, in der es zum Imponieren bei Frauen reicht,…	HOF	HATE	hasoc_2020_de_857
1127285625231749120	RT @DieserButzi: scheiß egal wie lang ich leb denn ich hab den scheiß gelebt	HOF	PRFN	hasoc_2020_de_1143
1132711804696764418	@nERDANZIEHUNG @DF_Chris Parallel zu den Letztwählern gibt es halt auch Letztgewählte.	NOT	NONE	hasoc_2020_de_1544
1132647615064158209	@tommycassells War schon echt nice! :)	NOT	NONE	hasoc_2020_de_997
1124808054032207873	RT @krippmarie: Kanzlerin #Merkel sagt Niger Hilfe im Kampf gegen Instabilität zu Sie verteilt nach dem Gießkannenprinzip deutsche Steuerg…	NOT	NONE	hasoc_2020_de_945
1127318076528234497	Hirn, lass locker, ich regel das schon ☝	NOT	NONE	hasoc_2020_de_3487
1124444630181916674	Möchte mich mit 90% meines abiklasse prügeln, weil es einfach dumme huuuuuunte waren/sind	HOF	PRFN	hasoc_2020_de_3077
1132336624187129858	Ich will zurück zu IHR	NOT	NONE	hasoc_2020_de_2952
1133847701882318848	RT @Pablaer: Merkels Vollstrecker - Die Antifa	NOT	NONE	hasoc_2020_de_1802
1126860477970157569	@juviatears Zahls mir einf zurück ✌🏼😔	NOT	NONE	hasoc_2020_de_129
1123688225208446976	RT @DFakeNews1: Würde Deutschland nicht von Idioten bewohnt, würde es nicht von Idioten regiert.	HOF	HATE	hasoc_2020_de_1671
1123507748497428481	@rauhnacht @Info_DIREKT @ArminWolf Jetzt stellst du dich noch dümmer als du eh schon bist.	HOF	OFFN	hasoc_2020_de_2910
1130883486586474497	6. ich habe eine ungesunde obsession mit miley cyrus und das halt schon seit der grundschule	NOT	NONE	hasoc_2020_de_2516
1132700471657844737	Frau kam grade nach Hause ,,Haste die Prognosen gesehen?Die scheiß Kinder u ihr Klima!“ Ich: das Zitat twitter i… https://t.co/ahb2QlGHhX	NOT	NONE	hasoc_2020_de_2239
1132290704942739456	@78warschoen @kess_18_ @fckoeln Wenn Horn mal ausfällt und Kess uns den Arsch rettet, dann will ich dich sehen	NOT	NONE	hasoc_2020_de_1511
1132523451086823425	@MissSchmaguelze @who_is_Annett Gute Idee. Diese Idioten glauben ja auch jeden scheiß 😀	NOT	NONE	hasoc_2020_de_201
1132937621838159874	RT @abballern: wie kann man arsch hauen nicht mögen	HOF	PRFN	hasoc_2020_de_1090
1125092616591355904	RT @rhythm_rhymes: Wir sitzen alle nicht in diesem Boot. #fckafd https://t.co/hhmTzZjfo2	HOF	HATE	hasoc_2020_de_391
1132370375764058112	mdchen splitternackt deutsche schwarz porno streaming porno deutsch nackte geile weiber https://t.co/n4dPot1kft	HOF	PRFN	hasoc_2020_de_1059
1133247056599035904	@Gripskrams @janboehm @leogfischer zum kotzen, dieser mob, der sich auch noch als "das volk" versteht.	NOT	NONE	hasoc_2020_de_1406
1133025538635968512	@Meidoragon_ das ist echt so, bei dem Spaß verfliegt die Zeit einfach	NOT	NONE	hasoc_2020_de_2665
1124955789989437447	@Echsenkrafthaus @tagesschau "Meine beiden Omas und Opas ihre Töchter und Ehemänner und die Kinder + deren Kinder u… https://t.co/x6p4P8NkHo	NOT	NONE	hasoc_2020_de_3280
1128728159610900480	@chokemeat6am bei türken einfach gelogen	NOT	NONE	hasoc_2020_de_3105
1128775370696744961	„Ich kann mir überhaupt nicht vorstellen, dass Angela Merkel in der Versenkung verschwindet, sie ist nicht nur eine… https://t.co/S7tU5xcJxy	NOT	NONE	hasoc_2020_de_1796
1133439935866970112	RT @SirSchnee: Hört das niemals auf? Bei dem Volksfest Schlossgrabenhock in #Ehrenkirchen-Kirchhofen hat es einen Messerangriff durch eine…	NOT	NONE	hasoc_2020_de_1614
1126349867587112960	@Ralf_Stegner Nach euren unzähligen Lügen glaubt euch diesbezüglich eh kein Mensch. Hört auf uns den nächsten Krieg… https://t.co/wKdTxNluiP	NOT	NONE	hasoc_2020_de_678
1125650316404449280	@welt Die Franzosen und Tschechen machen das schon für uns, die sind weit weg, den Müll müssen wir auch nicht entso… https://t.co/nC3XxRlxtm	NOT	NONE	hasoc_2020_de_485
1132418866108424194	gratis muestras porn mia deutsche porno deutsche riesen brste zorras maduras gratis https://t.co/daiFqlMfnB	HOF	PRFN	hasoc_2020_de_3258
1132919749896298496	RT @kamuezue: Solange Politiker meiner Generation nicht aufhören, die nächste Generation als zu dumm fürs Leben zu beleidigen, dürfen Erstw…	NOT	NONE	hasoc_2020_de_3047
1133636636133220353	Mein Bus fährt nicht ich bin am arsch :)))))	NOT	NONE	hasoc_2020_de_1092
1132751101130924033	RT @LIZ_de: Nazis raus im Rathaus #Leipzig #srwle19 https://t.co/4BuFay4i53	HOF	HATE	hasoc_2020_de_913
1125379095926321158	RT @_schnurri: Ich, wenn ich mit dem Rest der deutschen Linken rumhänge http://t.co/ZlKhzyvCWi	NOT	NONE	hasoc_2020_de_653
1125005526054707200	@aufklaerer2017 @SawsanChebli @HeikoMaas Sie ist die bundesdeutsche Geheimwaffe gegen den Allahkultus😂	NOT	NONE	hasoc_2020_de_3020
1131665745274908693	RT @AufgewachteWelt: Spahn fordert einen europäischen Islam! (ntv) EU-Wahl‼️ #niewiederCDUCSUSPDGrüneFDPLinke	NOT	NONE	hasoc_2020_de_649
1129072369346256896	Jetzt nehmen uns die Ausländer schon die Parkplätze weg. Vor allem die Flüchtlinge, die alle mit ihren Autos kommen… https://t.co/5X2Ji4pcS9	NOT	NONE	hasoc_2020_de_1765
1130742545401696256	RT @krippmarie: Nach dem mit übelsten Methoden herbeigeführten Staatsstreich in Österreich lassen es sich die deutschen Linken nicht nehmen…	NOT	NONE	hasoc_2020_de_2742
1127127671912173568	@aussieguylive @JosieJoBee @SunnyCAnderson @femnationwatch @samanthaluvhe Du bist einfach nur Dumm !	HOF	OFFN	hasoc_2020_de_2965
1132904453244411904	@WunderEileen @Mircow @nicihood Ich wollte mir einfach mein eigenes Bild machen 😅	NOT	NONE	hasoc_2020_de_251
1127678144964640776	@ExGruene Ohne Bleiberecht hei#t sofortige Abschiebung ist die zu dumm das zu begreifen?	HOF	OFFN	hasoc_2020_de_2227
1134205710907170816	@MRSL0NELYY Du bist einfach wunderschön 🥺	NOT	NONE	hasoc_2020_de_2875
1129663611012550656	@Glueckskekse1 Mir dem "sch" haben echt alle Kleinen Probleme. Aber das hört sich immer so süß an😊	NOT	NONE	hasoc_2020_de_2715
1130742188894089217	@HeikoMaas @alicanglobal Dänischer Politiker fordert eine Mauer zu Deutschland zur Abwehr von Flüchtlingen. Rasmus… https://t.co/b96SSzv5LC	NOT	NONE	hasoc_2020_de_2377
1124220163610566656	Es hört nicht auf.	NOT	NONE	hasoc_2020_de_2324
1134194134619738112	@MarcFelixSerrao Glücklicherweise hat #Merkel den Libanon und Jordanien vor einer Destabilisierung durch deren über… https://t.co/czI0We66HL	NOT	NONE	hasoc_2020_de_3449
1129445272336125952	@fiomythoughts *glubscht zurück*	NOT	NONE	hasoc_2020_de_1319
1127238896453062658	gabriel gei https://t.co/ZCJJrLMOPC	NOT	NONE	hasoc_2020_de_422
1124713216641249280	RT @deutsch365: 💥💥💥 In Afrika wird der Islam wie vor 1.400 Jahren mit Gewalt verbreitet. Die weltweite Expansion des Islam ist scheinbar un…	NOT	NONE	hasoc_2020_de_679
1126143524628512770	@MarkusHammer9 @tagesschau So dumm kann nur einer schreiben der nicht weis was Krieg bedeutet!	NOT	NONE	hasoc_2020_de_865
1128975443179315200	Will einfach nur heulen, aber es geht nicht und das Gefühl ist eigentlich noch schlimmer als alles andere	NOT	NONE	hasoc_2020_de_1810
1127198811523297281	RT @tagesschau: Zyklon "Fani": Es hätte viel schlimmer kommen können https://t.co/kAL6GzUXsu #Fani #Indien	NOT	NONE	hasoc_2020_de_1358
1126119285724798981	RT @EmmxbelleChrist: Boah leck... scheiß auf dumme Huren, scheiß auf Nazis. @EmmxbelleChrist hat einen neuen Hass: Stimme von pubertietende…	HOF	PRFN	hasoc_2020_de_2183
1125408586107170818	@julianabolika ging tatsächlich um einen zeh aber der war nich nur gelb sondern auch so gesplittert und spröde und ekelhaft ich will kotzen	NOT	NONE	hasoc_2020_de_2231
1129044082985189376	@Blumi_87 @Patriots Arsch😜😜😜😜 https://t.co/3PAMPXSwkI	HOF	PRFN	hasoc_2020_de_2929
1133781289272782848	@RolandTichy @Menschaffe Weil die GRÜNEN SOROS gehören! Und die Journalisten ebenso von dem gepampert sind! Das ist sonnenklar!	NOT	NONE	hasoc_2020_de_1505
1123681463998799881	Was war ich dumm, Was war ich stur. Ging sie fort, die Frau fürs Leben, O‘ was würd ich für sie geben.	NOT	NONE	hasoc_2020_de_3247
1131602113472151552	RT @SoleyLifa: @MalteKaufmann Malte guck mal..... Ihr seid schon richtige Checker..... Dummheit ist echt bei Euch Mitmachkriterium ....http…	NOT	NONE	hasoc_2020_de_3233
1129374598309601282	RT @nicole_schoen: Sebastian Kurz „schweigt“, Sebastian Kurz „schaut zu“, blablabla, hört doch einfach auf, ihn als Außenstehenden zu betra…	NOT	NONE	hasoc_2020_de_1643
1129474670217039872	@AlteRosa7 @marcelsardo @Propapanda666 Beides halt Scheiße im Endeffekt	NOT	NONE	hasoc_2020_de_599
1131665204201304064	RT @wortuose: Jeder hat ja so einen Song, den er das erste Mal hört (und sieht) und sich denkt: Boom! Meiner ist dieser hier: https://t…	NOT	NONE	hasoc_2020_de_2921
1133456021022806017	Dat Murksel is in Brüssel, um ihren blassen Willi namens weber auf'n Thron zu hieven.	NOT	NONE	hasoc_2020_de_629
1123682890024353792	@ChristianEnder @Hallaschka_HH ist aber Blödsinn, niemand, der eine deutsche Staatsangehörigkeit erworben hat, mus… https://t.co/n9fEOQ0Fiu	NOT	NONE	hasoc_2020_de_1165
1125771179472629760	RT @MensworldZone: Wenn Frauen in die Jahre kommen und einen stock im Arsch haben dann endet das so! Als ob ein "block" eine strafe wäre. h…	NOT	NONE	hasoc_2020_de_2500
1131508446271070208	@PsychBSC @fanvomscf @Canstatt93 @fcunion Warum schaffen wir nich einfach das auf- und absteigen ab? 😂😂😂	NOT	NONE	hasoc_2020_de_85
1134080930358992896	RT @baerbeli04: Ich bin für den sofortigen Kohleausstieg! Ab sofort keine Kohle mehr für Grüne, deren Politik sich gegen das Wohl des Volk…	NOT	NONE	hasoc_2020_de_869
1125013298100035584	RT @aufklaerer2017: Was soll man zu @sawsanchebli von der @spdberlin noch sagen ? Wenn sie Tweetet, warte einfach, bis sie sich selbst wide…	NOT	NONE	hasoc_2020_de_2466
1133081364801183744	RT @HannahNeedsHugs: hab grade wieder gemerkt was für eine scheiß schlechte freundin ich doch bin das ihr mit mir befreundet sein müsst tu…	HOF	PRFN	hasoc_2020_de_350
1131662981215997955	@Fred_ahoi Nur blöd, wenn man's vor lauter Dummheit und Gier nicht erwarten kann, bis man "ehemaliger Parteichef" ist. 😁	NOT	NONE	hasoc_2020_de_2389
1128384117610090496	RT @cornelia_cagol: Bei aller Welcome-Euphorie vergessen Merkel &amp; Co. gänzlich die Belange der Bürger und der Staatsbediensteten. Merkel &amp;…	NOT	NONE	hasoc_2020_de_533
1134581298268385281	RT @Gaby3101: Ich will nicht behaupten, dass ich zugenommen habe, aber wenn Sie mir am Arsch vorbeigehen, nehmen Sie Proviant für 3 Tage un…	NOT	NONE	hasoc_2020_de_420
1128362865084325888	Ich hab so null Ideen, was ich zeichnen soll. Haut mal ein paar Ideen raus!	NOT	NONE	hasoc_2020_de_1244
1128286524557156353	Scheisse, jetzt muss ich auch ins Europaparlament einziehen.	HOF	PRFN	hasoc_2020_de_1681
1132342013880356864	@Traijan_ @misterlemonade_ @maudado @DeutschlandVolt Kann man denn nicht einfach die Grünen wählen? Die sind immerh… https://t.co/KlqeIcpY8P	NOT	NONE	hasoc_2020_de_1044
1132751583467462662	Ich bin echt am struggeln, ob ich mich traue meinen Arsch mal in so'n schicken Jumpsuit zu drücken qwq	NOT	NONE	hasoc_2020_de_2736
1125752632264601605	sofort diese masken dreck von meine gesicht. auch raus aus meinen gesäß, bauch. die NSA soll die schlangen weg, sof… https://t.co/Q23SXXY3rI	NOT	NONE	hasoc_2020_de_2791
1131896033536106498	@Floooryy @xDeturns @MyraHawo Sag das mal zu einem Kanack ins Gesicht du Hurensohn	HOF	PRFN	hasoc_2020_de_2840
1127923377530912768	@mac_and_i @heiseonline die haben halt wie Samsung gemerkt das genug Idioten deren Phones auch alle 12 Monate kaufe… https://t.co/gKx1SQwdKn	NOT	NONE	hasoc_2020_de_84
1134155530241478656	#Grüne haben es in #Kolumbien nicht einfach - https://t.co/dEXg3LPE8k	NOT	NONE	hasoc_2020_de_3459
1128363775256559616	Jetzt europäische Nazis im #ZDF. #Europawahl2019	NOT	NONE	hasoc_2020_de_9
1132714782656782341	Die Idioten Verbrecher und Wahnsinnigen im NRW-Landtag haben diesem Gesetz zugestimmt. https://t.co/8tfy8jcSdG https://t.co/vRPDSOkvNz	NOT	NONE	hasoc_2020_de_2695
1124735085729730565	@ichbinschoener @echo_pbreyer @szagunn Für Freigabe von Drogen sind die Grünen auch schon lange nicht mehr, stimmt's? ;-)	NOT	NONE	hasoc_2020_de_964
1131505904527003649	Merkel wäre das nicht passiert #AmthorVideo	NOT	NONE	hasoc_2020_de_833
1127274434824417280	@Yuma_lein Wird unter einem grünen Justizsenator und einer grünen Bezirksbürgermeisterin schwierig 😉	NOT	NONE	hasoc_2020_de_2697
1123526799009427456	Deutsche Behörden halten Bagdadi-Video für echt https://t.co/k7f6NfuPBB	NOT	NONE	hasoc_2020_de_3301
1128017535440498690	@GehDuschen69 Boy schaff ich auch nicht bleib mit der lieben Anna sitzen	NOT	NONE	hasoc_2020_de_1827
1126134779487838209	RT @spitze19: @namifay @Nooirine Was soll diese Scheiß..??? Arschloche Deutschen Leuten. Kartoffelfresser. Kommt doch mal nach Thailand, da…	HOF	HATE	hasoc_2020_de_3483
1134102010960252928	RT @CaZuRaa11: So ein Hurensohn, ohne Witz. https://t.co/hZJIdRkPrm	HOF	PRFN	hasoc_2020_de_2626
1131984785017102339	@Gegen_die_AfD richtig no Nazis, also keine Parteien, die hochprozentig Nazis in Amt und Würden hatten https://t.co/OxQ36LhiXR	NOT	NONE	hasoc_2020_de_1322
1133705594685272064	was soll ich jetzt machen um geld zu verdienen? in nem klamotten laden arbeiten?? bedienen gehen?? meinen arsch verkaufen??	NOT	NONE	hasoc_2020_de_2477
1130212540577980416	RT @Hadmut: Blog: Merkels 2002-zu-2015-Wende https://t.co/AJ29pIJsAW	NOT	NONE	hasoc_2020_de_312
1134214753839210496	Deutsche Kappa https://t.co/Yc5I6gQHFn	NOT	NONE	hasoc_2020_de_1224
1130012170257874944	RT @SirSchnee: „Ja, es war dumm“ - Österreichs Vizekanzler #Strache tritt zurück. In #Oesterreich wird noch zurück getreten, dies kennt ma…	NOT	NONE	hasoc_2020_de_1260
1125815693633622016	@KimberlyHot4 Wie geil 🍆🍆🤩🤩 haste auch schon ne geile Double Penetration bekommen mit gleichzeitig Schwanz im arsch… https://t.co/4VJbVj6Lqc	HOF	PRFN	hasoc_2020_de_2203
1134317224867459072	RT @deutsch365: Muslimische Welt empört: Angola verbietet den Islam - https://t.co/6ynyw2sES9 https://t.co/ey8UhB5bP9	NOT	NONE	hasoc_2020_de_2541
1127557101545455616	RT @AndreaSchlegel3: https://t.co/bXmmFYhTvA Bescheuerter geht's echt nicht mehr.. Der Berliner Senat will zurückkehrende IS Terroristen vo…	NOT	NONE	hasoc_2020_de_174
1131653019748245504	Und Herbert ist nicht eingeladen? Undankbares Pack! #gntmfinale #GNTM	NOT	NONE	hasoc_2020_de_588
1125848086247555073	Martin Schulz @MartinSchulz	NOT	NONE	hasoc_2020_de_1396
1134382798628892672	Da sollte man besser mit dem Rücken zur Wand sitzen 😬	NOT	NONE	hasoc_2020_de_143
1132653700978270208	Dieser Kommentar zeigt eindeutig, wie nah sich AfD und Nazis nahestehen. Eine Schande für EU und das deutsche Volk,… https://t.co/mOmu66QPhL	NOT	NONE	hasoc_2020_de_6
1129302955411365888	Vault 69 - 999 Frauen und ein Typ	NOT	NONE	hasoc_2020_de_1462
1131430277056729088	@namenskind Es weiss es einfach und du dann auch! 😊❤️	NOT	NONE	hasoc_2020_de_1050
1132309419918860291	@bettercallaxel Grüne eher nicht: https://t.co/OTwBikhJJ9	NOT	NONE	hasoc_2020_de_760
1127925197846327297	@janboehm Kaum tut ein Politiker mal was fürs Volk wird er auch schon angegriffen. Wäre er ein besserer Politiker w… https://t.co/JYMMtWWCoI	NOT	NONE	hasoc_2020_de_2011
1131460568311848960	“Die Linken”	NOT	NONE	hasoc_2020_de_571
1127919023843364866	@texas_boi69 Nehm ich gerne und bearbeite in mit dem mund und meinen arsch	HOF	PRFN	hasoc_2020_de_2402
1130753467386073088	RT @zeitonline: Bei der Europawahl werden die deutschen Grünen wohl ein Rekordergebnis erzielen. Doch wie sieht es eigentlich im Rest von E…	NOT	NONE	hasoc_2020_de_3298
1124994469881839616	@Anabell2301 Willkommen zurück.	NOT	NONE	hasoc_2020_de_2018
1133821147773112320	RT @pinkcrazypony: Millionenfach holt man Islamisten ins Land und präsentiert sich noch auf Wahlkampfplakaten mit Islamisten und jede Parte…	NOT	NONE	hasoc_2020_de_406
1124681214093418497	@MarieSkyler13 Geiler Arsch	HOF	PRFN	hasoc_2020_de_697
1125890855548669956	RT @frankundfreya: Kasperletheater für dumme Kartoffeln https://t.co/6OGaAcr0a2	HOF	HATE	hasoc_2020_de_1995
1126051342215196672	@ZtarEid @MULTR4BR41N Es musste einfach mal wieder sein	NOT	NONE	hasoc_2020_de_2519
1131487281825632256	@Harit04 @Justin44243406 @DerMalteDuerr In München hätte man keinen Unterschiedmacher gebraucht, sondern einen Arsch in der Hose.	NOT	NONE	hasoc_2020_de_2253
1133046019409752064	Ich bin jetzt schon #TeamQuintus weil er sich weigert den verschwitzten Lendenschurz von einem anderen Dude anzuzie… https://t.co/ZyafHJLqda	NOT	NONE	hasoc_2020_de_1708
1129455670032523264	@ObiJuanKenobi6 @reklamedame Schlimmer sind eher die, die Kritiker als Hater abstempeln.	NOT	NONE	hasoc_2020_de_31
1127965177943609345	RT @MontanaBlack: Jeder der diesen komischen Frauen Face Filter Postet ist ein Opfa	NOT	NONE	hasoc_2020_de_2354
1130852016756944903	RT @SimyisCW: Habe gerade mein deepWaterBlue Pack released. Falls ihr noch ein stabiles Pack braucht, könnt ihr es euch gerne downloaden :)…	NOT	NONE	hasoc_2020_de_2632
1129085367498498048	@dieserOskar Ist einfach so. Sorry das müsste raus. Ich könnte es mir nicht unterdrücken. Ich würde einfach von meinem Gehirn gezwungen	NOT	NONE	hasoc_2020_de_3009
1131380327065235456	RT @helllud123: @ZDFheute Tja, das zeigt nur einmal mehr, wie unfassbar unfähig die linksradikalen Altparteien sind. Außer Hetze und indire…	NOT	NONE	hasoc_2020_de_1463
1128301519189757953	@Didinable Was für ein widerliches Stück Scheiße dieser Typ	HOF	OFFN	hasoc_2020_de_2689
1128346368907542528	@HeyItsMeBuboy @greeeengurl einzig richtiges ranking: pc &gt;&gt;&gt;&gt;&gt;&gt;&gt;&gt;&gt;&gt;&gt;&gt;&gt;&gt;&gt;&gt;&gt;&gt;&gt;&gt;&gt;&gt;&gt;&gt;&gt;&gt;&gt;&gt;&gt;&gt;&gt;&gt;&gt;&gt;ps&gt;&gt;&gt;xbox	NOT	NONE	hasoc_2020_de_815
1133765157983801344	Cheers! 🍹 Afterwork -&gt; FF einläuten! #freierfeiertag #afterwork #cheers #itsaperoloclock #ourhood #lieblingsnachbar… https://t.co/H9MOfdGk7G	NOT	NONE	hasoc_2020_de_1948
1130150351636705281	RT @GeriBarreti: Rauchermüll ordnungsgemäß entsorgt #antiraucher #blackandwhitephotography https://t.co/eHBNbQNX6l	NOT	NONE	hasoc_2020_de_646
1126023915669807105	RT @SPIEGELONLINE: Fraktionen beklagen Ausschluss: Grüne und Linke attackieren Seehofer wegen Einheitsfeier https://t.co/ivJ3jmSvBe https:/…	NOT	NONE	hasoc_2020_de_907
1134326116800442368	Es ist so ungewohnt im Bus zu sitzen	NOT	NONE	hasoc_2020_de_3431
1131920930924650497	RT @old_and_grumpy: Heidi Klum ist peinlicher als die gesamte deutsche Politik. Das ist schon ne Leistung.	NOT	NONE	hasoc_2020_de_856
1126930732549660672	@KarpReturns klingt doch voll ulkig also echt es gibt legit 7 deutsche synchronsprecher	NOT	NONE	hasoc_2020_de_3368
1133789606594400258	Alle Kinder werden unsere neue Rucksäcke lieben! Süße Pandas und Lamas mit abstehenden Ohren, „beißender“ Hai oder… https://t.co/NddIsAAtcg	NOT	NONE	hasoc_2020_de_798
1134026983220875264	@Einzelfallinfos Am Arsch!🖕🏻	HOF	PRFN	hasoc_2020_de_2135
1128992786613776385	@MalteKaufmann 3, 2, 1...ich warte schon auf die linken Verharmloser von religiösen Kopftüchern für Kinder.	NOT	NONE	hasoc_2020_de_3106
1133263666047070208	RT @Ugugu: Studiert ungläubig Wahlresultate von ehemals linken Hochburgen in Mittel- und Süditalien in denen Salvini abgeräumt hat. Schon v…	NOT	NONE	hasoc_2020_de_3340
1124005843056377857	Am krank sein hasse ich am meisten die Gliederschmerzen... Ohne scheiß, welcher Vollhorst hat das denn bitte erfunden!??	NOT	NONE	hasoc_2020_de_3050
1127568510064816129	RT @DestroysBoys: Boxer verde #Pack #ChicoDesnudo #DestroysBoys https://t.co/AQUZ45izdJ	NOT	NONE	hasoc_2020_de_1695
1123639206381785094	@ralf_bauer @Ma_Heller @welt Gibt's denn nicht so ein vermummungsverbot? Oder gilt das nicht bei den Linken?	NOT	NONE	hasoc_2020_de_1418
1127910215800840193	Scheiß ma auf Charakter Hauptsache mein Sack wird entleert	HOF	PRFN	hasoc_2020_de_2751
1133219625838239745	Daniel Vogelbach &gt; Your favorite player	NOT	NONE	hasoc_2020_de_1887
1133116248856965123	jetzt ab in eine andere welt nachti	NOT	NONE	hasoc_2020_de_3165
1131720585803948033	porno nani gratis partnertausch kostenlose deutsche pornos sesso gratis segretaria deutsche mature als sklavin https://t.co/kBuplnQxQI	NOT	NONE	hasoc_2020_de_1670
1125118642226647042	RT @Disfosgen: Während wir uns von #Kühnert ablenken lassen, arbeiten die #Grünen weiter an der Umsetzung --&gt; Marsch in den totalitären Sta…	NOT	NONE	hasoc_2020_de_2055
1130174552745697280	@SLAKE180 @KaFuNow Willkommen zurück 👍	NOT	NONE	hasoc_2020_de_2944
1134374204474830849	Warum der Höhenflug der Grünen i-wann in sich zusammenbrechen wird - weil sie mit ihrer Vorstellung eines grünen Ka… https://t.co/UONx1zjinQ	NOT	NONE	hasoc_2020_de_645
1133998298384261120	RT @srfnews: #Malaysia will nicht mehr die Müllhalde der Welt sein und schickt tonnenweise importierten #Müll zurück an die Absender. #Abfa…	NOT	NONE	hasoc_2020_de_1104
1131202882844405762	RT @danslesfIammes: junge erdnussbutter ohne trinken kriegste nicht runter die scheiße kelbt wie ein hurensohn	HOF	PRFN	hasoc_2020_de_2240
1123967511303733251	@Auristrahl chillen und einfach chillen	NOT	NONE	hasoc_2020_de_1949
1127978406807732224	Vestalentracht einher; wirf du sie ab!	NOT	NONE	hasoc_2020_de_3132
1134400167233368064	@FrikaWies Wäre Clinton an die Macht gekommen, hätte sie auch die USA mit Moslems geflutet. Hatte sie ja schon ange… https://t.co/owsDj0zNaT	NOT	NONE	hasoc_2020_de_938
1124324329162969088	Wenn das Kind schon genug Spielzeug hat, kauft Frau halt was für den Hund. 🤣 https://t.co/7A1Gd1Zl9Y	NOT	NONE	hasoc_2020_de_2511
1129511164839378950	@grobi_grobsen Chefs lachen über Idioten, die für lau arbeiten!	NOT	NONE	hasoc_2020_de_1646
1124378620229750797	Ja, echt mal! Wo kommen wir denn da hin, wenn #Wissenschaftler einfach so zu #Ergebnissen kommen? Wäre die… https://t.co/CR4mA52SS5	NOT	NONE	hasoc_2020_de_1939
1127196085221494784	RT @helllud123: Staatsfunk und Lügenpresse befinden sich im absoluten Panikmodus und verbreiten dummdreiste Lügen" "Portale, die zum Teil…	HOF	HATE	hasoc_2020_de_321
1128693292370100225	Warum gibt es Kalorien und Fett und Zucker ich will einfach nur Müll in mich reinstopfen bis ich mich nicht mehr be… https://t.co/sfTlW5pU7F	NOT	NONE	hasoc_2020_de_1660
1128754373989941248	Sau dumme Strafe von Ehliz #GERSVK #EishockeyWM	NOT	NONE	hasoc_2020_de_340
1123555378996940801	RT @kifferbarbie: Supermarkt. Irgendein Kind: „Maaaaamaaaaa!“ Ich: „VERDAMMT NOCHMAL, WAS?!?“ Mein Kind: „Bist du dumm, ich steh neben dir…	HOF	PRFN	hasoc_2020_de_3429
1126780031219523584	@AkebanBluepaw Ist halt voll die scheiß verarsche das geht gar nicht 😡	HOF	PRFN	hasoc_2020_de_3418
1133575969732812800	Kostenlose omapornos, porno deutsche reife. Geile deutsche krankenschwestern, redtobe gratis! https://t.co/aSdBN80urM	NOT	NONE	hasoc_2020_de_1742
1127716468324540416	lak dumme nutte was willst du von meinen eiern	HOF	PRFN	hasoc_2020_de_3491
1131567279802605568	RT @BruderVom: Flüchtling mit 3 Frauen bewohnt 3 Wohnungen Deutsche Rentner auf dem Campingplatz Ganzes Video: https://t.co/YoiO8GmKrD http…	NOT	NONE	hasoc_2020_de_796
1128136162974097408	@ziemlichmuede yess bin hoffentlich sowieso bald in 50	NOT	NONE	hasoc_2020_de_2539
1127066091161886720	RT @talita_kum76: Warum fühlt man sich dumm, wenn man etwas nicht weiß? Eigentlich ist man doch nur dumm, wenn man nicht lernen möchte.	NOT	NONE	hasoc_2020_de_3272
1131854186952482823	⭐ PowerCell-Aktie sackt ab: Jetzt positionieren! ⭐ https://t.co/ixTVmwkNLr	NOT	NONE	hasoc_2020_de_3102
1132309487061221377	Raus mit dem Pack	HOF	HATE	hasoc_2020_de_2422
1132345541285875712	Uhhhhhhh, wie kann man so.... nichtmal dumm sein, keine Ahnung was das ist xD	NOT	NONE	hasoc_2020_de_2448
1128151958722887680	@vanishedLeaf Scheiß mal auf mathe du kannst stolz auf dich sein	NOT	NONE	hasoc_2020_de_3289
1124719860393676805	RT @deutsch365: 🇩🇪🇩🇪‼️ In Zwickau war das "Maas" voll, hunderte Bürger "verjagten" den Bundesjustizminister Heiko Maas aus der Stadt‼️🇩🇪🇩🇪…	NOT	NONE	hasoc_2020_de_2936
1134413295388114944	RT @maxotte_says: Teaser: "#Merkel richtet flammenden Appell an Studenten." Merkel? Nach #Harvard reisen, #Trump bekritteln, zu Hause #AKK…	NOT	NONE	hasoc_2020_de_1903
1126883718596124674	RT @jouwatch: Wirtschaftsaussichten: Deutschland ist am Arsch https://t.co/tlqqvZ8Dj3 https://t.co/NuABfRadVr	HOF	PRFN	hasoc_2020_de_3352
1132705655817744384	@RudiRocka @tagesschau Ich bin aber kein Fascho: ich habe genauso was gegen Nazis, den Nationalsozialismus wie auch… https://t.co/X6piXUWWa6	NOT	NONE	hasoc_2020_de_779
1123995634116300802	@Scyltara @MartinaZann Es fehlen Ötzemir Özekuz Barlay CHEBLI Lauterbach Stegner Roth Fahimi Künast Schulz K.Schul… https://t.co/3A7GWGf2k3	NOT	NONE	hasoc_2020_de_3193
1126035504527548417	Scheiss GEISTERRADLER!!🤮🤢😡	HOF	PRFN	hasoc_2020_de_539
1133703619168088064	Keine Versorgungssicherheit: Europa kann die deutsche Stromversorgung nicht retten https://t.co/gnkE7Cm99o via @welt	NOT	NONE	hasoc_2020_de_523
1125791907739779072	@COMPACTMagazin Das diese Büttel des Systems sich noch trauen sich als "Linke" zu bezeichnen. Beamte gehören zum Überbau. *Kopf schüttel *	NOT	NONE	hasoc_2020_de_3325
1132915865962405888	RT @SehrLesbisch: Hört auf, Nazis ihre Normalisierungsarbeit zu vereinfachen, indem ihr ~zum Spott~ deren Ideologie anwendet. Ich bin's SO…	NOT	NONE	hasoc_2020_de_1365
1126885689939890187	@NextLvlBastard @TomGoerdy Bischte dumm oder so?	NOT	NONE	hasoc_2020_de_1553
1132584583059447809	RT @kulturbolschewi: So. Nun sehen wir mal, ob das großmäulig angekündigte "Politiker abstrafen" dann auch mal funktioniert. Dazu müsste m…	NOT	NONE	hasoc_2020_de_1593
1131891436574715904	@CallmeSMZ Bist einfach unterbelichtet Kid	NOT	NONE	hasoc_2020_de_564
1125994656205017088	RT @66Norweger66: Es wird immer Besser! Wie ich schon sagte, die DE Politiker lassen sich immer neue Sachen einfallen. Um den Einfachen Arb…	NOT	NONE	hasoc_2020_de_1986
1126872553363054592	@MikotoMunakata @chefkochroci @moviepilot Sorry, aber dann bist du einfach dumm. Man findet das doch direkt...	HOF	OFFN	hasoc_2020_de_415
1129651757913653248	Handsome jack collection im sale auf steam einfach mal gegönnt hät ich gesagt.	NOT	NONE	hasoc_2020_de_1379
1134066409670086657	Linke Idioten kann man nur noch blocken. #Vatertag https://t.co/ZMjScHXMNT	NOT	NONE	hasoc_2020_de_57
1124018576980086785	RT @AndreasStraub: ZDF Heute: Merkel in Mali, Hochburg der Menschenschmuggler. Sie überwacht persönlich dass Bevölkerungsaustausch der Eur…	NOT	NONE	hasoc_2020_de_2330
1128194472184041472	@Ralf_Stegner Das stimmt	NOT	NONE	hasoc_2020_de_2037
1127137201366683648	@Susannchen01 Rot ist die Komplementärfarbe zu Grün, Sie haben eine grüne Erkrankung, mit dem Placebo schlucken Sie… https://t.co/ubL05CULIn	NOT	NONE	hasoc_2020_de_3089
1130073474217721856	RT @AliceWo18626168: Donald Trump Das deutsche Volk wird Angela Merkel stürzen https://t.co/hiFXB6Cxff	NOT	NONE	hasoc_2020_de_2935
1130207423527043072	mein zeitmanagement war einfach für‘n arsch	NOT	NONE	hasoc_2020_de_254
1125885004490465280	RT @pip_news: „Ich zerficke erst deine Hündin, dann dich“. ... „Und aufs Maul kriegst du auch, wenn du willst.“... „Dein scheiß Köter kann…	HOF	PRFN	hasoc_2020_de_665
1132967388796850179	RT @momentsammlerin: Cn: #ableismus AfD-Wähler sind nicht per se "dumm" wtf. Die wählen die Partei, weil sie Nazis sind. Nazis wählen Nazi…	NOT	NONE	hasoc_2020_de_2901
1131925284587016195	RT @bundesamtfvs: EIL +++ AfD veröffentlicht offizielle Zahl: "6 Millionen Deutsche sind dumm." https://t.co/AjuCxbw2Gk	NOT	NONE	hasoc_2020_de_2266
1130779627251744769	@jetsetcata chefket du hurensohn	HOF	OFFN	hasoc_2020_de_979
1129356269226266624	RT @wokeup777: In Saudi-Arabien gibt es Schilder an Pools, auf denen Hunde und Frauen durchgestrichen sind. Wollen wir das in Europa? https…	NOT	NONE	hasoc_2020_de_1149
1126144254429077505	@SurprisedTodoku @veemo2k19 fortnite is halt einfach scheiße optimized tbh	HOF	PRFN	hasoc_2020_de_2584
1128733779969871872	Einfach!! https://t.co/P4RQ9Lwml8	NOT	NONE	hasoc_2020_de_2895
1133114936023015424	@pupnsfd hmph fine &gt;:(	NOT	NONE	hasoc_2020_de_477
1129537177921171456	Kolumne Netzentdecker : „Ab und zu RussiaToday“ - https://t.co/lCoRd1De7M #GoogleAlerts	NOT	NONE	hasoc_2020_de_1411
1128961123842183169	RT @golem: Flugtaxi: Fünfsitziger Lilium Jet hebt erstmals ab #elektroflieger https://t.co/GnaUHP9NOZ	NOT	NONE	hasoc_2020_de_3374
1133789069727719424	RT @AvalancheGerman: @deutsch365 Verdammte Zecken! Einfach mennschenverachtend die Ideologie der #ANTIFA. Eins ist sicher, wäre #Hitler heu…	HOF	HATE	hasoc_2020_de_3400
1132985134892896256	Leute beschweren sich über CDUs Klimapolitik, doch fressen permanent Fertiggerichte aus Zutaten vom Arsch der Welt… https://t.co/LxOyjZIJ3I	HOF	PRFN	hasoc_2020_de_896
1132722537891278858	nackte frauen fotze anfnger porno deutsch deutsche young home pornos gratis porno mpg https://t.co/v5YhSPwc3a	HOF	PRFN	hasoc_2020_de_1432
1125096978667458560	RT @helllud123: @tagesschau Die CO2-Lüge! https://t.co/cEi7t9mOhG	NOT	NONE	hasoc_2020_de_1402
1127653553747709952	Ansonsten tweety ich halt einfach Dong Alphonso, dass er schlimmer als Frohmann ist.	NOT	NONE	hasoc_2020_de_393
1128381529737052162	@hafentaenzerin Stimmt einfach	NOT	NONE	hasoc_2020_de_2370
1132082923329458176	@marteimer Keiner von den "echten Journalisten" will da halt seinen Arsch riskieren um den Job bei der Zeitung zu v… https://t.co/HLHh99QdSA	NOT	NONE	hasoc_2020_de_1489
1129061237655052289	@JanaMll15178714 Ob der kleine Bannon nicht weiss, dass die Nazis in Stalingrad richtig einen auf die Fresse bekomm… https://t.co/IEob5jXFbs	NOT	NONE	hasoc_2020_de_3401
1133368414590918658	RT @MOKoffizieIl: @tacoskrt68 hurensohn ich ficke deine mutter	HOF	PRFN	hasoc_2020_de_3412
1131891428165136384	#nowplaying Robin Schulz - Speechless (Ft. Erika Sirola - Intro Clean) |IOS: https://t.co/Fq6nDK4fRK | Android:… https://t.co/zADuBzDScn	NOT	NONE	hasoc_2020_de_2819
1134434480838520834	Ich will sie zurück 😔😔	NOT	NONE	hasoc_2020_de_3142
1123652732987031552	@GustafGabel @NVIDIAGeForceDE Geiles Pack würde es echt feiern wenn ih es bekommen könnte, ich habe mit letztens e… https://t.co/0cpt3u5MEB	NOT	NONE	hasoc_2020_de_2287
1134528869472620544	Traditionell stehen die Grünen nicht gerade im Verdacht, der deutschen Rüstungsindustrie besonders nahe zu stehen.… https://t.co/O4vgNl5458	NOT	NONE	hasoc_2020_de_3171
1132687729387614208	ich hab grünen gewählt weils meine lieblingsfarbe ist	NOT	NONE	hasoc_2020_de_3078
1130773516142432256	RT @GtzFrmming: Schon witzig, dass Claudia Roth uns das Wort "Altparteien" untersagen will. Dabei haben es auch die Grünen seinerzeit gerne…	NOT	NONE	hasoc_2020_de_3277
1129773656970792960	@PGDeutschland @FCBayern drecksbayern pack!	HOF	HATE	hasoc_2020_de_16
1131668639353069568	Iven Axen Blitzschutz GmbH -&gt; https://t.co/dxBBc9QDkH	NOT	NONE	hasoc_2020_de_3313
1126252404561915904	Wollte mich eigentlich um Mitternacht nicht mehr damit beschäftigen wie am Arsch wir trans Menschen sind but here we fucking are	HOF	PRFN	hasoc_2020_de_1913
1131690768471646209	RT @asapfuro: Fler zeigt wie man flowt einfach Gänsehaut https://t.co/HOFEbTZgJm	NOT	NONE	hasoc_2020_de_2919
1128588497680576512	RT @ChristinaBRoth: Das stimmt: Gräben zwischen linken und rechten Frauen zu ziehen, bringt echt nichts. Ich organisiere übrigens den #Frau…	NOT	NONE	hasoc_2020_de_503
1125502127449751554	@welt ... Hitler könnte man nach heutigen Gesichtspunkten als Veganer bezeichnen !	NOT	NONE	hasoc_2020_de_530
1131557532231712768	@PureLove3103 @SirkCaligo @holyprincessch1 Ich Blöcke nur Psychopathen. Du bist nur dumm.	NOT	NONE	hasoc_2020_de_1183
1134261390288531456	@YaGorlJoozma Zeppelin &gt;	NOT	NONE	hasoc_2020_de_1872
1126292120405286912	Eine Frau ist ein Gegenstand und das teilt man gerne, Hose auf, Frauen kauf, komm und zeig dein Arsch, du geile Sau	HOF	HATE	hasoc_2020_de_1054
1132642984539955201	RT @IIIoritz: Für unsere Linken Freunde 😊 https://t.co/zEsHDslPgg	NOT	NONE	hasoc_2020_de_1824
1131623223395803136	RT @kamar2019: @Gruene_Austria Willst du jetzt die Linken quälen? Dann musst du einfach Strache wählen! #votestrache	NOT	NONE	hasoc_2020_de_3103
1126775102899511296	Seits bei Cafepress diese scheiß E-commerce-Verkäufe gibt, sind die Provisionen noch kleiner. Und man kann seine Pr… https://t.co/cBVgbkK03M	HOF	PRFN	hasoc_2020_de_542
1134493146572873730	2/2 31.05.2018 - ich ziehe Suarez und CR7 in einem Pack https://t.co/vJMAC4JZut	NOT	NONE	hasoc_2020_de_735
1125683870853103616	RT @DoraBromberger: @tagesschau Schlechte-Politiker-Problem. Untätigkeit-Durch-Werbung-Kaschieren-Problem. https://t.co/NzwbBL2L15	NOT	NONE	hasoc_2020_de_3335
1126191947872382976	@AZeckenbiss Sie wollen das Volk massiv mit Lügen, Hetze und Hass aufwiegeln. Bannon ist ein Ami-Nazi der in Europa… https://t.co/5rNzPB5dgA	HOF	HATE	hasoc_2020_de_1455
1127266964773253121	@Furkan_Ak3010 @zeitonline Fick dich halt mit deiner Kinderfickerreligion	HOF	PRFN	hasoc_2020_de_1698
1128404040579153920	RT @nnamrreherdna: Also mir hilft das immer sehr, wenn ein sächsischer Politiker mal wieder Nazis verharmlost und mir dann sächsische Journ…	NOT	NONE	hasoc_2020_de_2375
1133997321094668289	@vonBuehlau DIESER FUCKING REZO IS NE SCHEIß LINKE ZECKE! NIEDER MIT DEM GRÜNEN UND ROTEN PACK!	HOF	HATE	hasoc_2020_de_1465
1131294788454629377	RT @tagesschau: Sicherheitslücken bei Onlinebank: Finanzaufsicht knöpft sich N26 vor https://t.co/ieCUX9TcQK #N26 #BaFin	NOT	NONE	hasoc_2020_de_2309
1124764278077235201	@shoutoutxobella @Ryulayy Halt deine Fresse du Hurensohn	HOF	OFFN	hasoc_2020_de_3361
1126884259669663744	@Ralf64904117 Dumm gelaufen , jetzt bist du nicht mehr Oma´s Liebling ! 🤣🤣🤣	NOT	NONE	hasoc_2020_de_1961
1129918394034212866	gratis pornofilme nl superior porno gratis video gratis moglie deutsche frauen spritzen ab https://t.co/zgf0WaAlGv	HOF	PRFN	hasoc_2020_de_2713
1126964832249495552	@erontmaloku HE LOREDANA HE HITLER ICH STERBE VOR LACHEN https://t.co/M4gzGcc9dv	NOT	NONE	hasoc_2020_de_392
1124830476793991169	Verleiht der Rock den Frauen mehr Weiblichkeit?#Dennsiewissennichtwaspassiert https://t.co/2PlegHOqDV	NOT	NONE	hasoc_2020_de_1946
1123871755360247808	Das Kopftuch und die Linke - Wie faschistisch ist die Antifa? - https://t.co/TIDDeQpB4G Zukunft Leben Ist der Kam… https://t.co/KbOM9P3FQz	NOT	NONE	hasoc_2020_de_892
1129381867046801409	Zurück aus #eppelheim vom #Frisör https://t.co/8ORBCpzJPu	NOT	NONE	hasoc_2020_de_1839
1124363856275562497	@bitangeI @KeroKeroDeVito Verdammt stimmt	NOT	NONE	hasoc_2020_de_1928
1131118581515718657	@Ralf_Stegner Der Hochmut der deutschen Politiker ist beschämend......insb. der Ihrer.	NOT	NONE	hasoc_2020_de_241
1132565066958745600	@Pabgee Ist das nicht einfach 113?	NOT	NONE	hasoc_2020_de_1398
1128671796562223107	@Pofetisch Ich glaube auch. Bald holen sie uns ab. 👽🛸😎	NOT	NONE	hasoc_2020_de_1527
1133781964589293569	Die meisten Journalisten in Deutschland sind ja auch keine Journalisten, sondern linke und grüne Aktivisten.	NOT	NONE	hasoc_2020_de_889
1129447189154009088	RT @RUBewaehrung: Zu einfach https://t.co/C3kKoZwc4M	NOT	NONE	hasoc_2020_de_3321
1123592347592347649	Lügen gegen rääächds 😱 Statistik gegen rääächds 😱 ... Alles gegen rääächds, wenn hüpfen nicht mehr reicht 😝	NOT	NONE	hasoc_2020_de_3338
1134535278360694785	Er hat Nazis in einem Nazinetzwerk als Nazis enttarnt - jetzt wollen ihn die Nazis loswerden https://t.co/QH9UaeYpt2	NOT	NONE	hasoc_2020_de_504
1132963337095004165	RT @clas_hannes: So von wegen #Rezo Video und kein #AmthorVideo und #NieMehrCDU. Angela Merkel weiss schon am 2.4.98 warums keine #CO2Steu…	NOT	NONE	hasoc_2020_de_937
1123643400685748226	RT @DfaCheck: Unfassbar! Weg mit den #Nazis! #NazisRaus https://t.co/J90Njwu2AE	HOF	HATE	hasoc_2020_de_2165
1129675749357707270	RT @ClaudiaZettel: Wenn einfach nur Strache gegen Hofer getauscht wird und die so weitermachen, soll mir keiner mehr kommen und das System…	NOT	NONE	hasoc_2020_de_2362
1127396619098492928	@Zwunchen @_sissil_ bist du dumm wenn dann 75%	HOF	OFFN	hasoc_2020_de_2739
1132916339914530817	@keineaggrosmehr es ist halt ne abwägung für mich. die grünen sind zb auch gegen eine impfpflicht, was ich nicht gu… https://t.co/3y7CdiWFm4	NOT	NONE	hasoc_2020_de_2650
1130141489076592640	RT @rivotrilmitstil: manche maenner einfach andere liga an dumm siehe: https://t.co/WRvmvMCxGF	HOF	HATE	hasoc_2020_de_1927
1125855208167415811	@tagesschau Fehlt eigentlich noch folgendes Zitat von BMW-Chef Del… äh Krüger: „An Elon Musks Stelle würde ich den… https://t.co/FQTz8qWzlL	NOT	NONE	hasoc_2020_de_140
1126793893402611712	RT @Schwulemiker: Vergesst niemals was der Islam ist! Schaut Euch die Gesellschaften an, in denen der Islam die Mehrheit stellt! Seht, welc…	HOF	HATE	hasoc_2020_de_624
1133226454194499584	RT @lawyerberlin: Wieviel Prozent bekäme die #AfD, wenn Sie im Staatsfunk (#ARD, #ZDF) und von den linken Journalisten (Pleonasmus?) genau…	NOT	NONE	hasoc_2020_de_3243
1127992893917016064	@dopetobetattoo @tagesschau doch	NOT	NONE	hasoc_2020_de_988
1127108201969856514	RT @willnurschreibn: Um offenen Sozialstaat ohne Grenzen für alle Migraten der Welt zu finanzieren: #Merkel will Renten für Deutsche NOCH!…	NOT	NONE	hasoc_2020_de_766
1133947677325123584	Deutsche muschi tube, deutsche 18 porno. Deutschsprachige sexvideo, bel porno gratis. https://t.co/5IAzllGHzt	HOF	PRFN	hasoc_2020_de_917
1126171248965443584	@KompetenzWolf @brxkentears @Scribatz @KevinBTW_ Echt mal der arme Simbabwe	NOT	NONE	hasoc_2020_de_3324
1131656060618432512	eBay: 1999 Porsche CARERRA GT -- 1999 Porsche CARERRA GT https://t.co/Ev7aOF8nxs #porsche #porsches https://t.co/kI59LVQ70I	NOT	NONE	hasoc_2020_de_2762
1132515985200680960	@eysvog3l Aber da wollen sie doch garnicht hin , sie wollen doch zu Merkel !! 🤔🤔	NOT	NONE	hasoc_2020_de_670
1127901659424862208	Wie unterhalte ich mich mit Freundinnen in der Öffentlichkeit über Sex, ohne dass uns all die dummen Kerle in Hörwe… https://t.co/0ILkCeVfRX	NOT	NONE	hasoc_2020_de_2987
1131279470822866945	Moslems vertreiben Christen aus Berliner Asylunterkünften https://t.co/QI2TxhBXDV	NOT	NONE	hasoc_2020_de_62
1133237007063420929	HAHA 😂 versteht ihr?? Die Sind halt einfach DUMMM 😂😂 Alle ausbürgern einfach 😂 oder MAUER BAUEN 🤪🤪	HOF	HATE	hasoc_2020_de_1137
1129715351971753984	Funko, Gundam &gt; GF 👌🏽	NOT	NONE	hasoc_2020_de_487
1134534074582937605	@Ungebeten1 @Ofenschlampe @lawyerberlin #Kahrs: "Arsch macht häßlich!" 😂	NOT	NONE	hasoc_2020_de_2064
1133059730593783809	@mazze791 @PoggenburgAndre Kleiner Typ an Neo Faschisten, einfach keine Nazi Sachen wie Afrikaner jagen oder Hitler… https://t.co/XrTU3OR9kZ	NOT	NONE	hasoc_2020_de_1269
1124271740958461953	RT @AliceWo18626168: ja das stimmt schon ist schon die SED https://t.co/3GVlMkpzsv	NOT	NONE	hasoc_2020_de_128
1129354042042400768	@JustSkda Literally jedes andere Getränk &gt; Cola	NOT	NONE	hasoc_2020_de_2226
1129863482206248966	@bruderych mit welchem geld du hurensohn	HOF	PRFN	hasoc_2020_de_3320
1134409780582334466	RT @mariomayl: #Merkel hält Rede an US-Eliteuni #Harvard und düpiert #Trump , indem sie seinem Hass- #CNN ein Interview gibt. Folge: #Trum…	NOT	NONE	hasoc_2020_de_3356
1134320475473993730	RT @KoelnerPeter: Was für ein Irrsinn. Der Islam überrollt #Europa / #Deutschland und in deutschen Talkrunden und in der Politik wird darüb…	NOT	NONE	hasoc_2020_de_3263
1132915438134992896	RT @Horst_Hutzel: Die ersten Tage nach einer Wahl. Die Zeit, in der die deutsche Einheit ihr wahres Gesicht zeigt.	NOT	NONE	hasoc_2020_de_3144
1133089036187373568	RT @jan_f_orth: Ich fürchte mit @akk werden wir noch in anderen Bereichen viel Spaß bekommen und Angela #Merkel nach kurzer Zeit schon schm…	NOT	NONE	hasoc_2020_de_2164
1133092844615417856	@ExoTrioX52415 @raidr_fn Warum bin ich ein kek du hurensohn	HOF	OFFN	hasoc_2020_de_2314
1129554034824753152	@skaltenbrunner Es ist eine einzigartige Hetze, die die öst. Medien seit der Angelobung veranstalten. Widerlich! Ab… https://t.co/cmMjtR8dQA	NOT	NONE	hasoc_2020_de_2212
1126065665763414016	@kulturbolschewi Einer "gelockerten Poperze" wird ab jetzt - als Juwelchen meines Wortschatzkästleins - gehuldigt.	NOT	NONE	hasoc_2020_de_2411
1133029984573054976	RT @PlatonsTochter: Baden-Württemberg: Ehemaliger AfD-Landeschef tritt aus | https://t.co/Lpzjzf7sNS Trendet #Idioten schon? https://t.co…	NOT	NONE	hasoc_2020_de_710
1133016499902386178	RT @JacobyJost: @MS_Berlin Auf dem sinkenden Dampfer der Linken sind die weniger werdenden Wähler von der roten auf die grüne Seite gewechs…	NOT	NONE	hasoc_2020_de_970
1132973575403708416	RT @manager_magazin: Mit dem Rücken zur Wand: Huawei-Gründer keilt gegen Trump - und macht sich lustig... https://t.co/LsNWxjSE3k	NOT	NONE	hasoc_2020_de_570
1128615890654769152	@WELTnews Zeigt mal wieder die totale ignoranz ggü dem islam seitens WO.	NOT	NONE	hasoc_2020_de_3040
1128944967353810944	RT @polenz_r: Kaum zeigt einer den Hitlergruß, heißt es, „aber die Linken“.	NOT	NONE	hasoc_2020_de_2374
1131913003702603776	Merkel telefoniert mit neuem ukrainischen Präsidenten https://t.co/djlzuPntqU	NOT	NONE	hasoc_2020_de_2960
1128211366823772160	Ein Rülpser ist ein Magengas, das den Weg zum Arsch vergas.	HOF	PRFN	hasoc_2020_de_3387
1133119189047283719	@schautnichtweg Igitt, jetzt hab ich was Ekliges im Kopf. 😂	NOT	NONE	hasoc_2020_de_1985
1123483299907813377	Ende des Monats kommen neue Euro-Scheine in den Umlauf #tradesfeed -&gt; https://t.co/2219bwousQ	NOT	NONE	hasoc_2020_de_2264
1130887404095721475	RT @COMPACTMagazin: Der Lachknaller: #Gruenen -Politikerin Claudia #Roth hat versucht, das Wort "#Altparteien" als "Goebbels-Ziat" zu tabui…	NOT	NONE	hasoc_2020_de_2008
1133717418440830981	@hhavink62 @Batu_0699 @MemetOhneH "Du bist so ein hurensohn Du heulst rum, dass man dich während des Ramadans belei… https://t.co/056UMctzZ2	HOF	PRFN	hasoc_2020_de_3347
1127979245647667200	"eigenes" zu haben. Man kann Männern auch mal lassen, was Männern ist und Frauen lassen, was Frauen ist. Das änder… https://t.co/3eXvqP6ZYH	NOT	NONE	hasoc_2020_de_71
1127427854080380929	final destination 3 &gt; citizen kane	NOT	NONE	hasoc_2020_de_2000
1129394437363294209	Pack hinter jedem Satz einfach „Prank 😂“ und alles ist im grünen Bereich DU HURENSOHN ICH FICKE DEINE TOTEN!!!! Prank 😂	HOF	PRFN	hasoc_2020_de_1873
1133266203613585408	@Juergen_Fritz @BILD Merkel verschleißt ALLE......	NOT	NONE	hasoc_2020_de_2771
1126784133252952064	Es stimmt halt.	NOT	NONE	hasoc_2020_de_2999
1125497186559713280	RT @AlexLNTC: Ich möchte eine Welt in der ich aus einer Toilette trinken kann ohne Ausschlag zu kriegen!	NOT	NONE	hasoc_2020_de_3041
1130819066288115712	@Howie__Official Die soll ersma arsch zeigen	HOF	PRFN	hasoc_2020_de_1934
1125559316797362177	@Heavenlyuri Gabriel angel	NOT	NONE	hasoc_2020_de_1147
1132727101302419457	RT @schneeridara: Schade das Ergebnis für die Grünen hat mir jetzt den Soaß verdorben Späße über die SPD und Schulz zu machen 😞	NOT	NONE	hasoc_2020_de_2450
1124728806839922688	Erst #Merkel, dann Amri, jetzt Habeck. Alle wurden/werden falsch eingeschätzt. Immer mit fatalen Folgen. https://t.co/gJfeak98DA	NOT	NONE	hasoc_2020_de_1025
1128351016183840769	@Myers_Obsession @MCote_BHVR @PaulieEsther1 @DeadByBHVR @LMcLean_BHVR @Patricia_BHVR @not__queen Der Deutsche wiede… https://t.co/DndBg6vteA	NOT	NONE	hasoc_2020_de_2916
1132993443825967106	@LukiFutTrader @FynnFUT Das war keine taktische meisterleistung sondern einfach disasterclass von barca wäre bei ba… https://t.co/vvywOIltwH	NOT	NONE	hasoc_2020_de_2614
1127998161946140672	Bodenfahrzeug beschädigt Merkels Regierungsmaschine - NewswireNow - https://t.co/93cb8VNbSz #newswirenow	NOT	NONE	hasoc_2020_de_842
1131872759322173443	RT @Toni62574625: @Hochheimer_12 Die erfolgslose #klöckner taugt nun mal nichts	NOT	NONE	hasoc_2020_de_2834
1126903628990701568	@TurgayArdahanli @Real_AlBundy @BILD Erdolf ist schlimmer als Hitler. Erdolf lässt Babys hinrichten ,frauen vergewaltigen und töten 🤮🤮	HOF	OFFN	hasoc_2020_de_1047
1125870244743077889	@famous_blubb 2, ka jz is eh schon besser mein eines Argument ist halt schon unpassend haha	NOT	NONE	hasoc_2020_de_601
1133473268013387777	@we3lash Ich wäre heulend rausgerannt und sofort zurück nach Deutschland geflogen byebye	NOT	NONE	hasoc_2020_de_2104
1131661068630220800	RT @aufklaerer2017: Als @ConstSchreiber für "Inside Islam" heimlich filmte und aufdeckte, wie in deutschen Moscheen gehetzt und gegen Chris…	NOT	NONE	hasoc_2020_de_654
1123987337795575808	@KYSOLTIX Nichts ich bin einfach zu 200IQ	NOT	NONE	hasoc_2020_de_2649
1130994136528674816	darkskin men &gt; 🥴	NOT	NONE	hasoc_2020_de_2072
1124668299843969024	@HSV Wolf halts Maul und verpiss dich	HOF	OFFN	hasoc_2020_de_1960
1125081874995601408	RT @jazellah_: Mein Körper ist dazu da geilen Käse zu essen und kacken zu gehen. Deiner ist dazu da deine scheiß Fresse zu halten du incel…	HOF	OFFN	hasoc_2020_de_3470
1134402700605571073	RT @APatzwahl: Die deutsche Bundeskanzlerin #Merkel erhält in #Harvard einen #Ehrendoktor! 👉🏼Sie sagt: „Man darf Lügen nicht Wahrheiten n…	NOT	NONE	hasoc_2020_de_427
1129654077359575040	RT @FPOEBlockwart: @LeoKohlbauer @SPOE_at Hahaha Leo..Sicher das wird euch den Arsch retten	HOF	PRFN	hasoc_2020_de_1864
1123597313656741888	Claudia ist Abschaum.	HOF	OFFN	hasoc_2020_de_3176
1131329299192188931	@_SweetDiamond_ @tagesthemen @tagesschau @gigi_deppe Nach "..die Merkel..." bin ich ausgestiegen. Hab ich was verpasst? 🤔🙄	NOT	NONE	hasoc_2020_de_736
1130905708017463297	@eygulli @HydraOR @leonard07226586 Du bist einfach genau so ein hässlicher hurensohn wie dein Freund HAHAHAHAH	HOF	OFFN	hasoc_2020_de_2218
1128350961645301765	@hanseat1966 Genau das! Ich hab das ganze scheiß Wochenende damit verbracht, hab meinen Sohn deswegen vernachlässig… https://t.co/rZgrhgWJLJ	HOF	PRFN	hasoc_2020_de_2925
1127372854142623744	RT @pinkcrazypony: Eigentlich ist das hier ja keine Singlebörse , ach egal ich starte einfach mal einen Aufruf an die Single Frauen mit pat…	NOT	NONE	hasoc_2020_de_1877
1129792665573367808	RT @deutsch365: Nicole Höchst: „Die Grünen sind die größten Heuchler der deutschen Politik!“ https://t.co/OVNfgvrJGH via @jouwatch	HOF	OFFN	hasoc_2020_de_1519
1133396642252709890	RT @croix_du_nord: Da bin ich meines Glückes Schmied und krieg jetzt den scheiß Hammer nicht hoch....	NOT	NONE	hasoc_2020_de_2302
1126889204779241472	RT @GywerMelanie: Ich will mit Dir auf der Parkbank sitzen, wenn wir alt sind. Verliebt. #tiny60s https://t.co/14KwNImjd3	NOT	NONE	hasoc_2020_de_1561
1127203932743376896	@HanyuuVent Orange und Gelb können ja echt nur wenige, aber wir sind halt einfach schnieke.	NOT	NONE	hasoc_2020_de_1081
1125806008977301504	@janboehm @ORF Man schüttelt einfach nur noch peinlich berührt den Kopf und denkt sich OIDA!	NOT	NONE	hasoc_2020_de_1892
1131942787442794497	@DensoTM Ist einfach nur übersetzt 😂	NOT	NONE	hasoc_2020_de_2900
1127929081767571457	@maybach_ron @DDuric So werden bald alle Frauen behandelt Nücht mit Gleichberechtigung und so ein Müll das gehört ab sofort zu Deutschland.	NOT	NONE	hasoc_2020_de_2607
1125736857478758406	Divinity 2: Ego Draconis #38 – Mit dem Kopf durch die Wand https://t.co/PlbUd9wc6D	NOT	NONE	hasoc_2020_de_3071
1124243303598305280	die Deutschen - dumm, dümmer, am dümmsten ...	HOF	HATE	hasoc_2020_de_1552
1131738428377378816	deutsche privat amatre porno deutsche reife schlampen suche gratis porno erotikmassage fr frauen https://t.co/Im3BZYDJHs	NOT	NONE	hasoc_2020_de_3369
1133385854511190018	Emo hure, nenas desnudas gratis. Pissende fotze lecken, deutsche einkauf porno. https://t.co/1AO6lIr28j	HOF	PRFN	hasoc_2020_de_1678
1130797750843527170	RT @RussiaGoto: Was kann die Kinder so beeinflussen, was meinen Sie? "Geh zurück nach Russland, du Abschaum!", "Dabei kommt Edward gar nic…	HOF	OFFN	hasoc_2020_de_2111
1123908342269739012	RT @wundertussi: nichts schafft soviel ausgrenzung wie das wort 'wir'. verirrt euch nicht in dem wort, von dem ihr euch zugehörigkeit vers…	NOT	NONE	hasoc_2020_de_494
1131910059297071106	"Produktivität am Arbeitsplatz: Frauen sind bei Wärme leistungsfähiger als sonst." Und nun? Geschlechtergetrennte B… https://t.co/SYz5ZrtXRl	NOT	NONE	hasoc_2020_de_1297
1127991765670166529	@LenaSnape2 Willkommen zurück😊	NOT	NONE	hasoc_2020_de_3205
1130780910708772866	Jemand zu haben dem man einfach ganzen Scheiß des Tages erzählen kann ohne das es abfuckt is noice	HOF	PRFN	hasoc_2020_de_1807
1132320505464332288	@Gaumen_freude Ich auch 😍 Da gibt es einfach ALLES. Und bei Douglas stinkt es nur!	NOT	NONE	hasoc_2020_de_3319
1128458373563801600	Huhuhuee kangen unveil &gt;:(	NOT	NONE	hasoc_2020_de_1240
1134392927868858368	RT @Mara_Donner10: Deutsche Kid Rock https://t.co/BKnCnFUn9H	NOT	NONE	hasoc_2020_de_2369
1125173000410677249	@angelicIuv Einfach er lügt weil alles ab 1.85 gross rüberkommt	NOT	NONE	hasoc_2020_de_1324
1126737622632505344	RT @derFuetsch: Weil man als dumme Frau nichts zu sagen hat? https://t.co/GOhrYy3kfL	HOF	HATE	hasoc_2020_de_591
1132292021962575873	Keine Lust mehr auf den Scheiß!!! https://t.co/fDvRBkjkzk	NOT	NONE	hasoc_2020_de_969
1130077932767121408	Schau ich scheiß in die Lotion, deine Creme für's Gesicht Denn du sollst dich wohl fühl'n	HOF	PRFN	hasoc_2020_de_309
1128075467200897024	die hufeisen gehören auf den arsch	HOF	PRFN	hasoc_2020_de_1867
1132324771079819265	RT @Sir_Schnee: Rekordspende bringt #Grüne in Erklärungsnot. 100.000 € von #Südwestmetall! Jaja die #Klimasekte, nimmt was sie kriegen k…	NOT	NONE	hasoc_2020_de_719
1131611395479543808	Ich hasse es, wenn sich erwachsene Frauen wie Kleinkinder aufführen. #dasperfektedinner	NOT	NONE	hasoc_2020_de_1734
1133330066052669440	@grasimar Scheiß auf die Leute, kannste regulieren. 😂😂😂	NOT	NONE	hasoc_2020_de_957
1132317531719569411	@shoutoutxobella halt mal die fresse	HOF	PRFN	hasoc_2020_de_1151
1132011272042627072	@SchafDas @msp_pictures @DrDavidBerger Weil die Idioten nicht wengier werden.	NOT	NONE	hasoc_2020_de_1276
1128287006906290176	"Es ist ein Unglück, dass in der Welt mehr Dummheit ist, als die Schlechtigkeit braucht, und mehr Schlechtigkeit, a… https://t.co/JY6k5GXbUQ	NOT	NONE	hasoc_2020_de_823
1125747318093942784	@JARVIS1187 @SawsanChebli Der Islam ist ja keine Rasse und auch nicht angeboren, sondern eine Weltanschauung/Religi… https://t.co/EgwS1xi3EA	NOT	NONE	hasoc_2020_de_3283
1128085311211417600	RT @HeinzSc51846951: @verusoss1 @CroqiSunshine Merkels Vasall Haldenwang muss natürlich kurz vor den Wahlen auf " verstärkten Rechtsextremi…	HOF	OFFN	hasoc_2020_de_2296
1134392370018029569	RT @welt: Antisemitismus in Deutschland: Auf dem Weg zum Supermarkt hört er "Du scheiß Jude" https://t.co/otxPMMwlPb https://t.co/oc2krCIO8v	NOT	NONE	hasoc_2020_de_2279
1132413837121138691	@xRapidSandro @FlorianFOLI @Kimmich_WRLD Jaja wolltest nh? Wenn ich merke dass ich ganze Zeit so einen Scheiß laber… https://t.co/KS2nWsas61	NOT	NONE	hasoc_2020_de_2093
1131518185474285572	@milchmitzucker sorry aber sie ist auch einfach mega cute https://t.co/zxks54jqeB	NOT	NONE	hasoc_2020_de_1847
1134392755919249408	RT @c3llofrau: Zeit heilt einen Scheiß.	NOT	NONE	hasoc_2020_de_1731
1124239784547901443	RT @impFanOffiziell: Frau schiebt sich vor der Cam Elektrogeräte in den Arsch: "Boah geil, und auch voll interessant, lass mal in ne Talksh…	HOF	PRFN	hasoc_2020_de_2724
1126341881657532416	Chartanalyse der Infineon Technologies Aktie &gt; (noch) Halten &gt; Mit einem Kursrutsch aus dem Aufwärtstrend !… https://t.co/VymHSxmsmc	NOT	NONE	hasoc_2020_de_723
1132912753780379648	Oder auch: Nur Idioten brauchen "Führer"!	NOT	NONE	hasoc_2020_de_2063
1124303823206481922	@MuratSerin69 @MontanaBlack @yooli_derechte -&gt; 2 Monte kann ja nicht mehr machen als zu sagen hört auf zu beleidige… https://t.co/7n32xFZO3c	NOT	NONE	hasoc_2020_de_2282
1129820314416898048	RT @DfaCheck: Frau Merkel (Bundeskanzlerin) hat gesagt, man soll nicht zulassen, dass der Rechtspopulismus stärker und lauter wird! Hier me…	NOT	NONE	hasoc_2020_de_681
1129436627871436800	reife frauen blasen deutsche frauen porn schwarze beim ficken https://t.co/LLW7TbjyTE	HOF	PRFN	hasoc_2020_de_3350
1132788845680967685	deutsche hd milf porno geile lehrerin schne haarige frauen videos xnxxx gratis https://t.co/UQYAo53MWM	HOF	PRFN	hasoc_2020_de_3353
1134099028797526016	RT @tuesmavieg: frauen: stoppt body shaming, das ist ekelhaft und abwertend! mann: *unter 1.80* frauen: https://t.co/753taeqQyN	NOT	NONE	hasoc_2020_de_97
1126770401084755968	@Zyendra1 Dann hätte ich nur einen dummen Kommentar bekommen :/	NOT	NONE	hasoc_2020_de_53
1123849164851425281	RT @KHinnek: Erding: Grüne Stadträtin verleumdet Stürzenberger „Verurteilter Nazi“ https://t.co/Fvb2LcWoLt	NOT	NONE	hasoc_2020_de_925
1128985966709039105	@Edelnickel Früher als Kinderlose hätt ich den Leuten den Arsch aufgerissen für so eine Absage. Wenn jetzt jemand e… https://t.co/HImKbKxYCH	NOT	NONE	hasoc_2020_de_2756
1129118259222056962	Stoppt den Islam	HOF	HATE	hasoc_2020_de_2721
1133328711309234176	@EisMelone also mein 18 jähriges ich war ziemlich dumm, das weiß ich weil ich heute immer noch ziemlich dumm bin	NOT	NONE	hasoc_2020_de_1564
1131203847546912768	@veeenox War sein Gt nicht ScumpOfOpTic88	NOT	NONE	hasoc_2020_de_3378
1132598306817941510	Unfruchtbares Streitgespräch im Sektenstil, ob man mit Nazis reden soll oder nicht. #Europawahl Wir werden wieder p… https://t.co/E0Mx8AQDHm	NOT	NONE	hasoc_2020_de_2178
1124067730024534029	@enmachuk Deutsche leute... 🤦🏼‍♀️	NOT	NONE	hasoc_2020_de_1146
1134013293042028544	RT @KeineAFD2017: Das sind Nazis und wenn wir die alle hinter Gittern haben, wird es lange dauern bis wir den Hass, die Hetze und die Lügen…	NOT	NONE	hasoc_2020_de_536
1125808638814302208	@Garooozis @GOATaiGa @BBBBuddha @Rrxsky @Reselation scheisse man kann sich nicht so aufreizen	NOT	NONE	hasoc_2020_de_2136
1134164115985969156	RT @0Siegfried: @tagesschau Der totale Irrsinn die Anhänger dieser Ideologie zu hofieren, und Maulkörbe gegen Andere zu verordnen. https://…	NOT	NONE	hasoc_2020_de_2294
1129843559241310208	keine Ahnung ob das die Lyrics waren... ick versteh das immer net, das hat mein Gehirn nur aus den Geräuschen gemacht 🤷‍♀️	NOT	NONE	hasoc_2020_de_2495
1126181374006837249	@ZDF Deutschen sind Schädlingen	HOF	HATE	hasoc_2020_de_1829
1125445164632244225	@Hendricus56 @Bear_Greeter @drguidoknapp Stimmt, die frage ist halt nur ob man sich für Mindestlohn bücken möchte oder nicht...	NOT	NONE	hasoc_2020_de_1677
1125799843358760961	RT @HelalBeauty: Es ist genau ein Hochamt zu Erbauung. Die Linke wird immer hirnlosen Abschaum ohne Potential anziehen. Wie das halt ist, w…	HOF	HATE	hasoc_2020_de_2251
1127434967594754048	@Frank_Pasemann @AfDimBundestag @AfD Den Linken fällt halt nichts mehr ein.	NOT	NONE	hasoc_2020_de_1283
1127318676334575623	@TurkoGermane Bist du dumm	HOF	OFFN	hasoc_2020_de_2438
1134404957124354048	RT @DetlefStoldt: AfD-Chef Gauland: „Die Grünen werden dieses Land zerstören“ https://t.co/FtSberrDvB via @welt	NOT	NONE	hasoc_2020_de_3408
1128365306181750784	Ein Genderklo für schwule Islamisten und deren lesbischen Frauen.	HOF	HATE	hasoc_2020_de_676
1134185859262177285	RT @tagesschau: Ehrendoktorwürde für Merkel in Harvard https://t.co/KiFqX1swv5 #AngelaMerkel #HarvardUniversity #Ehrendoktorwürde	NOT	NONE	hasoc_2020_de_1220
1132184354166333440	Die Religion des Friedens mal wieder! #Islam	NOT	NONE	hasoc_2020_de_1374
1127912052922769408	@FineDilettante @TiniDo @JuedischeOnline Oder von Linken? So als offizielle Politik? https://t.co/m1j5Q1XXKW	NOT	NONE	hasoc_2020_de_1931
1132638588896763911	@schatti030 Aber wär doch geil wenn ein paar mehr von den linken in der EU sitzen als jetzt oder	NOT	NONE	hasoc_2020_de_514
1128380825081348096	RT @SirSchnee: Das größte Kreditinstitut in der #EU, die #DeutscheBank, könnte der Grund für eine neue globale #Finanzkrise werden. Der #I…	NOT	NONE	hasoc_2020_de_3248
1129712822814822401	@SinOfSpeed weil ich dumm bin, denke ich.	NOT	NONE	hasoc_2020_de_3130
1131504398788681730	Neulich im Konrad Andenauer Haus: "Fuck Fipsi, wir haben uns halt voll selbst zerstört." "Stimmt Paule, aber schei… https://t.co/eFQum1xkZt	NOT	NONE	hasoc_2020_de_1739
1131670132529487872	@champagnenihal er stürzt ab mit diese drogensachen keske yanimda olsa adam ederdim	NOT	NONE	hasoc_2020_de_1491
1128605321008644096	RT @journaliszt: Schreibt man jetzt "Rammstein sind dumme Nazis" oder "Leute, die Rammstein nicht verstehen, sind dumme Nazis"? Ist nicht,…	HOF	HATE	hasoc_2020_de_1468
1124664474634457089	@KreuzAcht AfD und die Bandidos, eine verschworenes, rechtsextremes Pack.	NOT	NONE	hasoc_2020_de_1811
1124821387707912193	Ich war angetrunken, es baut sich mittlerweile ab, aber ich möchte eine Umarmung bitte umarmt mich doch einfach :((	NOT	NONE	hasoc_2020_de_3143
1128666301994536963	Mit Pech ist mein Herd im Arsch und ich erreiche keinen bei der Hausverwaltung mehr	NOT	NONE	hasoc_2020_de_2678
1124332575143616513	RT @welt: Diese Musik hilft gegen Nazis und Islamisten https://t.co/tDOQ9exyHM https://t.co/FOap4LvwOD	NOT	NONE	hasoc_2020_de_3460
1124372769171488769	@polit_junkie @polenz_r Die "Linken" sind also am Versagen der sächsischen Polizei Schuld?	NOT	NONE	hasoc_2020_de_302
1128656583787982849	@justcumm Schön in den arsch	HOF	PRFN	hasoc_2020_de_2891
1124829793126682629	RT @PRINCESS_TSNINA: @MinipimmelL Halt einfach Deine Fresse Du Zeitfresser und Nichtzahler, Dich liest man überall nur negativ #timewaster…	HOF	OFFN	hasoc_2020_de_1279
1132174073956622336	@HerrNewstime @MatthiasHauer Bitte Halt einfach dein Maul und trete zurück und mach Platz für Leute in der Politik… https://t.co/yN2WwdU14j	HOF	OFFN	hasoc_2020_de_2158
1126095302698598400	RT @CarlDerOtter: Diese Aufgaben haben wir heute im Englischunterricht bekommen und sowas ist einfach nur ekelhaft und unüberlegt, vorallem…	NOT	NONE	hasoc_2020_de_788
1125518879504121856	@Gruene_Austria nie mehr zurück zu den Grünen	NOT	NONE	hasoc_2020_de_3094
1131981463099006976	RT @AlexanderTill5: Komisch, früher waren alle Nazis, die dem Führer folgten. Und heute sind alle Nazis, die der Führerin nicht folgen.	HOF	OFFN	hasoc_2020_de_91
1132706817644138497	dragonball &gt; alle anderen dragonballz	NOT	NONE	hasoc_2020_de_204
1132554325337804803	RT @PhilHackemann: Wie kann einem #Europa eigentlich so am Arsch vorbeigehen, dass man bei solch einer Schicksalswahl seine Stimme an „Die…	HOF	HATE	hasoc_2020_de_2735
1124981748541132800	Nach einem grünen Dribbling flankt Müller nach der 34. Minute die Pille ins hintere Mittelfeld zu Gauland der das Ding zielsicher ins lange	NOT	NONE	hasoc_2020_de_1556
1133198033573896198	alte frauen bumsen muschi lecke arschficken anal und porno gratis frauen porno https://t.co/su3TczSkx4	HOF	PRFN	hasoc_2020_de_343
1132902419032084480	Die kriegst auch nicht durch dummes Geschwätz zurück	NOT	NONE	hasoc_2020_de_1167
1131791712786030592	RT @DerZeroy: ich hab schon tweets gemacht da warst du stadtbekannt als hurensohn.	HOF	OFFN	hasoc_2020_de_114
1123660677015535616	@Ma_Heller @welt Grüne und Feinstaub sauber	NOT	NONE	hasoc_2020_de_352
1133988555007700993	@laeriaa kommt halt rr auch immer auch die umstände winkel und alles an du kuh	HOF	OFFN	hasoc_2020_de_3323
1133382268377022466	Awuuu... Hört man aus der Ferne heulen. Hört sich so an als wenn unser Silberner Wolf @everyone zusammen ruft. Geht… https://t.co/MC4JZjp0WB	NOT	NONE	hasoc_2020_de_2889
1133066139486101504	@RealBrandiBlack Hübscher Arsch😘 Den wünsche ich dir auch😍😍😘😘	HOF	PRFN	hasoc_2020_de_3384
1131958096643919872	Kopftuch-Debatte: Warum lieben Linke den Islam? https://t.co/Yng2xxD3aT via @welt	NOT	NONE	hasoc_2020_de_1125
1127643277728145415	@KompetenzSimba ScHeiSS NaZi	NOT	NONE	hasoc_2020_de_3196
1128102210078900225	@ntvde So eine dumme, unwissende und faule Pute!	HOF	OFFN	hasoc_2020_de_1787
1126159798511206401	@ChrisEpunkt Ihr Gesicht sieht aus wie Mülleimer und kleine titten auch aber net wichtig digga will nur Kopf auf di… https://t.co/SYYWkK2jKQ	HOF	OFFN	hasoc_2020_de_3099
1127840061863731202	@Not1Proud @PeperArno @derdems ich werde mir einfach mehr Auszeiten gönnen, dann wird es erträglicher.	NOT	NONE	hasoc_2020_de_1547
1124132905318473729	Arsch Arsch Arsch Arsch Arsch und Titten	HOF	PRFN	hasoc_2020_de_981
1129060608509263872	Mobi Download Feslegen =&gt; https://t.co/IahmSjr7Be	NOT	NONE	hasoc_2020_de_2133
1125472750552977409	@frht2208 @tagesschau Am höchsten christlichen Feiertag, dem Karfreitsg, essen die Leute im Westen, was sie wollen.… https://t.co/ZcLmK7o9lj	NOT	NONE	hasoc_2020_de_398
1132678510319931393	Gratulation zu 3 Sitzen @DiePARTEI @MartinSonneborn @nicosemsrott	NOT	NONE	hasoc_2020_de_1554
1129359100352106499	@TurboMyu Ach Niveau! Dieser Schweinekopf ist so selten dumm.	HOF	PRFN	hasoc_2020_de_1947
1132444447181090818	deutsche parkplatz porno reiche frau ficken gratis muschis com deutsche massage https://t.co/eGMFeQvEUo	HOF	PRFN	hasoc_2020_de_1100
1125987928533086214	braeden lemasters starter pack @BraedenLemaster https://t.co/0puMNXybdk	NOT	NONE	hasoc_2020_de_2733
1126820443342737408	@janboehm Und USA raus aus der NATO und UNO. Und überhaupt Amis raus aus USA, Winnetou ist wieder da!!!	NOT	NONE	hasoc_2020_de_2346
1124691339126484992	@pjakobs Am Ende sind wir doch alle Afrikaner. Ja ist schon schwierig das deutsche Gen zu isolieren. :)	NOT	NONE	hasoc_2020_de_2941
1124951083988783104	@NewsCompact Der Islam ist die Weltanschauung des Teufels!	HOF	HATE	hasoc_2020_de_1298
1132973126608982018	RT @thrvaim: Obacht, sonst fallen dir noch ein paar Lobbyisten aus dem Arsch. 🙄 https://t.co/9JlMPuki0D https://t.co/SAtUE8gqOI	HOF	PRFN	hasoc_2020_de_1899
1132690245978415104	@AntonioSV97 Doch, jeder ist besser als ein Rechter. Nazis raus	NOT	NONE	hasoc_2020_de_328
1128299275224539137	RT @Luisamneubauer: Beide, Schulze und Merkel, stehen jetzt in maximaler Verantwortung Ansagen zu machen. Denn für noch mehr unerfüllte Zus…	NOT	NONE	hasoc_2020_de_2780
1126766160655949836	RT @UgMads: ZDF lüftet pikantes Geheimnis um Angela Merkel https://t.co/pZY9byIr7u	NOT	NONE	hasoc_2020_de_1113
1129050269579448320	@SirSchnee Wie man die #Gutmenschen kennt, wird die Mutter auch durch eine solche Katastrophe nicht schlauer werden.	NOT	NONE	hasoc_2020_de_3327
1134522410223439872	Deutsche mature polizistin porn, deutsche sex orgie porno Arschfick tumblr hausfrau rapidshare porn.html https://t.co/XsERQLWpxE	HOF	PRFN	hasoc_2020_de_48
1127859766699667456	@SehrLesbisch 😠😠🔪🔪🔪 der Typ gehört fachgerecht entsorgt 🚮.	HOF	OFFN	hasoc_2020_de_2315
1132704347211608064	Scheiß Fakten Verdreherei	HOF	PRFN	hasoc_2020_de_662
1133004437096681472	RT @DSM_Nordkirche: Philippinen schicken 69 Container mit Müll zurück nach Kanada https://t.co/pgEjdIhVXv	NOT	NONE	hasoc_2020_de_2870
1125525921753128960	RT @Jennywild996: Retweet wenn ich mich auf dein Gesicht setzen darf 💦❤👅 #sexy #nude #young #wild #Germany #Arsch #Ass #findom #boobs #…	HOF	PRFN	hasoc_2020_de_3345
1129354776041463808	RT @FoersterCarlo: „Es hört einfach nicht auf! Ich möchte einfach nur noch weglaufen!“😥🌲🌳😱😳😢 https://t.co/1u8SSA8fTA	NOT	NONE	hasoc_2020_de_1310
1134568157509763079	RT @Maori: Hat er den Geldbetrag einfach … abgehoben? 👯‍♀️ https://t.co/wSUiBiCaFk	NOT	NONE	hasoc_2020_de_2036
1129855542393004039	@erzhngswndrlnd @AntonKrell @ZDDK_ Merkel beim Abschiedsbesuch von Obama: "Dazu bin ich damals in der DDR nicht fro… https://t.co/JxBcsGKvtS	NOT	NONE	hasoc_2020_de_1871
1131685202626064385	@endbossfight @HeroNoOneNeeds ihr seid alle dumm	NOT	NONE	hasoc_2020_de_2559
1133437620590120962	@Mexify @mcky_tv stimmt halt auch 🤷‍♂️	NOT	NONE	hasoc_2020_de_1171
1132579507964190720	RT @MikaMurstein: Besonders hass ich diese "Vom Saulus zum Paulus"-Geschichten: "Ich war früher so1 Arschloch und nun bin ich mega aware, b…	NOT	NONE	hasoc_2020_de_1712
1129754304481509376	eig ist der tag voll nice undso aber meine stimmung ist komischerweise trzd im arsch	HOF	PRFN	hasoc_2020_de_319
1133820237579718656	@emmaohnenamen Ganzes Studium für'n arsch oder?	NOT	NONE	hasoc_2020_de_1012
1127826870785978369	Wenden Sie sich bitte an den deutschen Waffenhandel und deren Lobbyistin Frau Merkel!!!! Ich als deutscher Steuerza… https://t.co/XfJyhcjG9C	NOT	NONE	hasoc_2020_de_3314
1123659972351545344	Jeder der Endgame spoilert ist ein Hurensohn 🙃 #DontSpoilTheEndgame	HOF	PRFN	hasoc_2020_de_242
1124642181896077312	"Werner Baumann ist so etwas wie der Martin Schulz der deutschen Wirtschaft – ein grotesk Abstürzender. Der Bayer-V… https://t.co/DVdNW16Ipc	NOT	NONE	hasoc_2020_de_294
1128313196123754498	RT @Irene97652350: @Hartes_Geld Merk dir, du... Das "Pack" vergisst nichts...	HOF	OFFN	hasoc_2020_de_534
1130821293471932416	RT @SteinbachErika: Erst Wasser predigen, und dann Champagner saufen..... So waren die Grünen und so sind sie immer noch... https://t.co/ud…	HOF	HATE	hasoc_2020_de_872
1133381651801808898	Oma in den arsch, videos gratis bangros! Ficken in prag, deutsche publik pornos gratis. https://t.co/luzw0vO4GR	HOF	PRFN	hasoc_2020_de_1387
1124649362540376064	RT @phenome71810818: in Zwickau ist das "Maas" voll, hunderte Bürger "verjagten" Heiko Maas aus der Stadt. Er flüchtete mit quietschenden R…	NOT	NONE	hasoc_2020_de_2250
1129533772163112961	RT @IQ_Stimulator: Er wäre der perfekte Kandidat für die Grünen als Bundestagsvizepräsident, wenn CR aufhört. Er wirkst soviel seriöser als…	NOT	NONE	hasoc_2020_de_2075
1123864557947105281	@FairDest @Cloafleev1606 @BlizzardCSEU_DE @Warcraft_DE Naja, wenn wir schon so anfangen ist das Wort "Hurensohn" auch fehl am Platz.	NOT	NONE	hasoc_2020_de_574
1134498146158034949	@TaylorLissi @_donalphonso Und der durchschnittliche Autofahrer ist auch umgänglicher... -&gt; Leichte Beute	NOT	NONE	hasoc_2020_de_187
1126038243407998978	@paar_aus Super würde aber besser direkt auf dem arsch aussehen 😃	HOF	PRFN	hasoc_2020_de_2397
1127340100822679553	RT @JungereCato: Also Ihr Tol(l)eranten und linken Hyperintellektuellen fangt schon mal an Eure Musikinstrumente zu zerschlagen um Eure Gäs…	HOF	HATE	hasoc_2020_de_1261
1128410042598928385	@Andreas69291642 @Uli_Hofstoetter @tagesschau Das haben dir doch unter deinen anderen Postings schon andere Leute erklärt.	NOT	NONE	hasoc_2020_de_1786
1130160841591017472	RT @EddieDonovan: Yazidis, die sich weigerten, zum Islam zu konvertieren, wurden vergewaltigt u lebendig in Käfigen verbrannt! 3000 Frauen…	NOT	NONE	hasoc_2020_de_2259
1131611261245042689	@vielweib Guckst Du -&gt; https://t.co/tmXiiRKHMU	NOT	NONE	hasoc_2020_de_2644
1125069900249276416	@jawl @miriam_vollmer @8xTeilzeit @_Daudi_ @LittleBinF Bzw. meist die Mutter, die erst ab Grundschulalter wieder ar… https://t.co/Nb1u1TDhHv	NOT	NONE	hasoc_2020_de_3039
1132632733652590594	Martin Schulz will Andrea Nahles angeblich den SPD-Fraktionsvorsitz streitig machen - WELT https://t.co/c3oVZiWgWr #schulz	NOT	NONE	hasoc_2020_de_3100
1130065094002581510	RT @frankundfreya: Die Briten sind immer schon einen Schritt weiter bei der Kriegsführung gegen die einheimischen Weißen. Man muß auf so et…	NOT	NONE	hasoc_2020_de_1655
1132346086524411904	RT @GamerBr0ski: Entweder bin ich behindert an den Augen oder diese Trikotwahl ist einfach Todes dumm 😂 Rot weiß gegen weiß rot? 🌚😂	NOT	NONE	hasoc_2020_de_133
1123899479709638656	@maschmeyer @KuehniKev @maschmeyer Sind sie sehr dumm?	NOT	NONE	hasoc_2020_de_932
1133061601249177600	RT @QuirinWeber: Die #EUWahlen in #Deutschland haben tektonische Verschiebungen ausgelöst. Sieger sind die #Grünen - auch bei den #Jungwähl…	NOT	NONE	hasoc_2020_de_1036
1127191228192305152	RT @ichbinkoelnerin: Wer also noch unentschlossen ist, aber seinen Verstand nicht durch Dauerapplaus (Merkel) oder Klimahüpfen eingebüßt ha…	NOT	NONE	hasoc_2020_de_1950
1123653454428295168	@NetteLiebe @Revo13834527 Es wird doch andauernd hier von Linken "empfohlen" die Wahlzettel zu unterschreiben". ..… https://t.co/9gGd5sQV8z	NOT	NONE	hasoc_2020_de_430
1124354788186099713	RT @BauerGeorg6: ⁦@AndreaNahlesSPD⁩, ihr seit Abschaum, ich nur „Pack“! 🤮........... https://t.co/nKTCTBEkYm	HOF	OFFN	hasoc_2020_de_2833
1131270822201577473	#Die scheiß Amis können nicht ohne Krieg auf dieser Welt, die weißhelme Zetteln den Dreck an und Amis spielen wiede… https://t.co/d9gPOjVghN	HOF	HATE	hasoc_2020_de_1684
1125352889910726656	@Akira_86 @74wonnie Ich werde ab jetzt diese Frage jedes Mal stellen! Und Wehe die kommen mir mit Belastbarkeit oder son scheiß	NOT	NONE	hasoc_2020_de_2109
1124041821812924417	@Gitarre159 @Luna1234luna1 @EngelGert Wenn es Deutsche wären, hätten es die Medien schon geschrieben, weder "Bild" noch ntv erwähnen was.	NOT	NONE	hasoc_2020_de_2100
1125779991722119173	"Solche Idioten... Man müsste ja nur einfach... Aber dazu sind sie ja zu blöd.. brüllbrüll" "Dann sag es ihnen. Fr… https://t.co/d71YD2sxBX	NOT	NONE	hasoc_2020_de_977
1131058267440988160	Mikromobilität: E-Scooter - Tel Avi zeigt, was auf deutsche Städte zukommt https://t.co/GHlTkv7Rle	NOT	NONE	hasoc_2020_de_1609
1130098853951225856	@atzenantifa @sueszling Warum haben die Linken eigentlich alle Brillen auf?	NOT	NONE	hasoc_2020_de_813
1123684660041715712	@Kellerfreak_N_E @MrsMarryPoppins @HerrPanTau Werte Winzerin, schieben sie da bald flott ihren Arsch hin. 😁.	HOF	PRFN	hasoc_2020_de_941
1134381003450003456	@JoanaCotar @MuellerLiesche Nur Deutsche und Osteuropäer.. IHR.. IHR nazis! 🤣	NOT	NONE	hasoc_2020_de_238
1133102952913264641	Frau Merkel Denkt ihr, Schulfreunde sind Fakefreunde?	NOT	NONE	hasoc_2020_de_3454
1130155732924542976	RT @Hochheimer_12: Es wird auch höchste Zeit Frau Merkel! Europawahl: Merkel knöpft sich Europas Rechtspopulisten vor https://t.co/pY0tlG…	NOT	NONE	hasoc_2020_de_2789
1129003863779008512	@newromantiics mei was willsch macha die hebbet glaub i a stock im arsch	NOT	NONE	hasoc_2020_de_3440
1129668702897627137	@ThegreatHubini @IlIIlIIIIlI @GeraldGrosz Das hättet Ihr Linken Spinner wohl am liebsten, nix dergleichen wird pass… https://t.co/C67SQAMaKN	HOF	HATE	hasoc_2020_de_2263
1126992728561209346	Die GRÜNEN und die Padophilie https://t.co/w6oY6MJPUl	NOT	NONE	hasoc_2020_de_1337
1127476415698546688	RT @IvanRodionov_: Egal wie lange #HeikoMaas schon im Amt ist, er wirkt wie ein fleißiger aber unbegabter Platzhalter. Als eine provisorisc…	NOT	NONE	hasoc_2020_de_782
1125477066487607303	RT @MarcoRouvoet: Max DHA (180 Softgels) - Jarrow Formulas -&gt; https://t.co/sANIrLUP6C https://t.co/wt5bc09kbO	NOT	NONE	hasoc_2020_de_2403
1131126013822406656	RT @Sachse02: @chrisjuko @helllud123 Gibt es in der Türkei jetzt deutsche Wahlplakate 🤔😎	NOT	NONE	hasoc_2020_de_1788
1126012918192119808	@MisterLavender @tagesschau Das stimmt, dazu bedarf es auch gewissen #Standards in #Rechtschreibung und #Grammatik	NOT	NONE	hasoc_2020_de_1215
1128331260999413760	RT @gorezilla360: @HolgerEwald1 @verusoss1 @China_Welt_News Genau das sind keine Flüchtlinge! Hört endlich auf, dieses Wort zu benutzen! Wo…	NOT	NONE	hasoc_2020_de_2051
1127158181300506624	@willnurschreibn @Graubaer1953 @welt Die ganze Welt nur Nazis. 😂	NOT	NONE	hasoc_2020_de_1540
1124786574997245953	RT @ZDFheute: Über 12.000 Rechtsextremisten in #Deutschland werden als gewaltorientiert eingeschätzt. Das Innenministerium zeigt sich alarm…	NOT	NONE	hasoc_2020_de_2340
1130160451495518208	RT @ero692015: Sailor Kamikatzerl brauchts hart in den Arsch! https://t.co/KnSO9Do4PR https://t.co/UNTgOTD2bl	HOF	OFFN	hasoc_2020_de_2527
1132574944544645123	👉👉Eva Herman Ihr seid Idioten‼️‼️😉https://t.co/z2MUkdw6nT	HOF	OFFN	hasoc_2020_de_3267
1129141223070076929	@Tentakelkaiser So sind die Kinder halt ... Man kann in Kinder nichts hineinprügeln, aber vieles herausstreicheln.	NOT	NONE	hasoc_2020_de_249
1125758416230780929	RT @revo_heart: Islamisierung Deutschlands: Barley putscht, Seehofer kuscht https://t.co/ltVU6HRS7D via @jouwatch	NOT	NONE	hasoc_2020_de_751
1131662201092222980	Lehrer mit Rücken zur Wand und Autoplay better Lovestory then Twilight https://t.co/86vSgIKZlB	NOT	NONE	hasoc_2020_de_1150
1131581217445490688	hah , 😂 tschuüs : ==&gt; meepmeep 💤 https://t.co/fopPjnHASx	NOT	NONE	hasoc_2020_de_1271
1133783680026107906	@knatterknabe @lillauch @NextLvlBastard Kurzgefasst. Du nicht Kolle. Kolle heult mit Pfeil im Arsch.	HOF	PRFN	hasoc_2020_de_1858
1133813530904260608	Fick mich bitte in den Arsch https://t.co/dy4inVpQLM https://t.co/ftbjBx1owq	HOF	PRFN	hasoc_2020_de_1205
1125967141575057410	So ist es, und war es schon immer. Die Menschheit ist im Grunde genommen 😜 dumm, sonst gäbe es diese Kriege nicht u… https://t.co/mRQxziMXca	NOT	NONE	hasoc_2020_de_200
1130823101221097472	@T_Meyer_T Was für eine grüne Laufstrecke! Voll viel 🌲🌲🌲🌳🌳🌳🌳!	NOT	NONE	hasoc_2020_de_2273
1133221756536332288	Wagner ist einfach wie die BILD: Saublöd!	HOF	OFFN	hasoc_2020_de_2931
1134499932969275394	@mariafan812 Vor allem die sind einfach wohlstandsverwahrlost, kein Proletariat	NOT	NONE	hasoc_2020_de_2457
1134407528257937413	@sxmclk das Gesicht sieht dann einfach viel markanter aus hehe	NOT	NONE	hasoc_2020_de_1476
1127924291893379072	Haben Deutsche eigentlich schon mitbekommen, dass "Stromberg" nur deutscher, billiger Abklatsch von "The Office" ist?	NOT	NONE	hasoc_2020_de_1495
1128960641467789312	@Pukhovka Verdammt, warum sehe ich das jetzt erst?	NOT	NONE	hasoc_2020_de_2947
1132742616037122053	RT @alisffm: @reinboth @Hallaschka_HH Das war vor ca 40 J schon einmal so. Und dann kommt die Zeit, in der die Grünen auch mal Leistung zei…	NOT	NONE	hasoc_2020_de_3458
1129486988892094464	zitat @NeIodyn zitatrecht ist ein hurensohn	HOF	PRFN	hasoc_2020_de_2441
1125838447715987456	@blackismyfavc Klapper mal die Schrottplätze ab, sehr viel günstiger	NOT	NONE	hasoc_2020_de_535
1124015485765419009	was verkauft ein buchladen überhaupt so eine scheiße und warum diese ganzen räucherstäbchen	NOT	NONE	hasoc_2020_de_3019
1130935600826245120	@AniMeep Einfach Kappa Shinobi Trainingsjacke	NOT	NONE	hasoc_2020_de_1460
1130322217416515584	sexy hintern nackt schne frauen poppen xxx hd gratis schlanke deutsche porno https://t.co/uJXafH1mXe	HOF	PRFN	hasoc_2020_de_3306
1132604791203487745	@Walnusskipferl Unfassbar dumm.	HOF	PRFN	hasoc_2020_de_2271
1130205221496512512	Türken sliden bei ihrer Cousine mit „Kennt man sich? 😏💦“ in die DMs	NOT	NONE	hasoc_2020_de_3318
1132340818499526657	@realDonaldTrump Ihr verfickten scheiß US amerikanischen Kriegstreiber übersät die ganze Welt mit Kriegen, Terror u… https://t.co/lSrNP65W5A	HOF	OFFN	hasoc_2020_de_1420
1129487940986519553	"UND DANN REIß ICH DER PUPPE DEN KOPF AB JA ICH REIß DER PUPPE DEN KOPF AB UND DANN BEIß ICH DER PUPPE DEN HAL… https://t.co/M4VFTZI3n3	NOT	NONE	hasoc_2020_de_2283
1134165344925442049	@WaWnord @che_notte Du bist so called Hurensohn	HOF	OFFN	hasoc_2020_de_1984
1129486821099024384	@KritischerTroll Oh, Grüne wollen ein neues KdF-Auto ? Grüne Idioten.	NOT	NONE	hasoc_2020_de_1459
1132581785462812672	@St4zBl0od @solmecke oupsi. Meine Grüne &amp; Linke kommen nicht in Frage, sorry ^^	NOT	NONE	hasoc_2020_de_1032
1123852520290435072	@ferraeterin Weil feige Nazis nicht wie Nazis aussehen wollen https://t.co/6yz605OuvO	NOT	NONE	hasoc_2020_de_3216
1126359820683100160	RT @_ichnicht: @Yuma_lein Buntland, Buntland über alles, retten wir die ganze Welt	NOT	NONE	hasoc_2020_de_3495
1133064612759384064	RT @publizistikon: Am deutschen Wesen soll die Welt genesen: Der deutsche Weltrettungswahn ist wieder da. Nur trägt er diesmal keinen kaise…	NOT	NONE	hasoc_2020_de_1353
1128361288017547264	@lijusolid Die Nazis meinten auch, sich zu Herren über das Leben anderer aufschwingen zu können.	NOT	NONE	hasoc_2020_de_2588
1131976870331920392	@heuteplus @ZDFheute @rezomusik Lügenmedienverdrossen durch Merkel bleibt bestehen.	NOT	NONE	hasoc_2020_de_1162
1132319431755911168	RT @NHausfrauen: SO fickst du jede in den Arsch https://t.co/YId8NW7DDp https://t.co/hvoKCVZLsW	HOF	PRFN	hasoc_2020_de_3059
1132765814753566720	RT @WerteunionB: Befremdlich, #ARD &amp; #ZDF im nationalen #sundayforfuture Dauerjubelmodus bei den #Grünen - Reminder: Es ist eine #Europawah…	NOT	NONE	hasoc_2020_de_1688
1129058364586119168	RT @MariaQ549: @gabrielzamora Gabriel: stop the hate Also Gabriel: https://t.co/AxbgZVTiOZ	NOT	NONE	hasoc_2020_de_3359
1127086529980129280	RT @mozart2018: Sie zerstört unser Land ihre Opfer sind vor allem unsere Frauen https://t.co/CExVLDn8wE	HOF	OFFN	hasoc_2020_de_3122
1132386582533746689	RT @Magnus01182053: Ausgerechnet Schulz will wieder zurück kommen, er verkauft sich an jedem......volksverräter +köterklasse Helmut Schmitt…	NOT	NONE	hasoc_2020_de_2570
1129763406096019458	RT @Kinderzaenker1: Der erste Nazi ist über seine kriminelle Energie geflogen: Strache tritt von allen Ämtern zurück. Immerhin könnte man s…	NOT	NONE	hasoc_2020_de_1338
1126356515579932672	RT @SirSchnee: Die grüne #Khmer möchte #Klimaleugner am liebsten ... Es gibt halt keine frei Meinung bei den #Klimafaschisten. #NoGrüne h…	HOF	HATE	hasoc_2020_de_597
1130170098415755264	Okay,kurzes Update: Aus den Gomd-Tresoren 3x WM35 bekommen!^^ (Rey,Gable,Sheamus-Alle 3 Single) TBG Pack: Ciampa(… https://t.co/eKAAr0aH7b	NOT	NONE	hasoc_2020_de_1065
1134233372350271488	Eyo ich ficke deine Mutter/ Du Hurensohn	HOF	PRFN	hasoc_2020_de_3358
1132024077223378946	@SebastianHertel @geraltwitcher67 @ZDFheute #S H#303 Sie haben eine echt schräge Welt- und Geschichtsansicht! Man k… https://t.co/gXEgL2Vrqy	NOT	NONE	hasoc_2020_de_1314
1123651940255137797	@dwerkopp 1. Es gibt Links autonome Parteien in Deutschland. 2. Diese Linken Extremisten verschwinden nicht, wenn e… https://t.co/RzBLSI0UYG	NOT	NONE	hasoc_2020_de_2720
1123551637707079681	RT @Linksbuendig: Auch @SEENOTRETTUNG ist gegen die Nazis vom Dritten Weg nach Plauen gekommen! #erstermai #pl0105 https://t.co/MzpR0zFmap	NOT	NONE	hasoc_2020_de_1704
1129045060228669443	Straßenbahn &gt; U-Bahn	NOT	NONE	hasoc_2020_de_1905
1128434331830116358	Ich hasse minecraft warum spiel ich den scheiß noch	NOT	NONE	hasoc_2020_de_447
1134371184584331264	RT @janni2872: Auch Männer brauchen ab und an einen sinnbildlichen Tritt in den Arsch und nachher einen beherzten Griff an selbigen.	NOT	NONE	hasoc_2020_de_2970
1133418184218992640	RT @Pantherrhei: deutsche Dolores umbridge https://t.co/C0s7T3pUg3	NOT	NONE	hasoc_2020_de_1628
1127180696311746560	So kann man seine linke Verblödung auch erklären.	HOF	HATE	hasoc_2020_de_1798
1130143389096251393	Ich kann aus Hirn, Ciabatta machen! ☝️ https://t.co/Lokz21NymL	NOT	NONE	hasoc_2020_de_1964
1134639452268171264	RT @juriamtresen: Deutsche Rapper und ihr Publikum https://t.co/puveRgLobs	NOT	NONE	hasoc_2020_de_2747
1123996615591759875	RT @toxicsugga: Mein Jeansarsch drückt dein Hirn zu Brei🐷 Kontaktiere mich ⬇️ https://t.co/gbjlWRGrHu &amp; lass dich geil von mir abmelken💸 @…	HOF	PRFN	hasoc_2020_de_1258
1133020635481989120	@Murmelmum Scheiße Echt scheiße https://t.co/zd98WSdnS4	HOF	PRFN	hasoc_2020_de_1403
1133715547777052672	@panemetc62 @ZDF @ZDFneo bei Dokus ist da ZDF schon besser aufgestellt	NOT	NONE	hasoc_2020_de_531
1134149779884269568	@Grano_Duro @tagesschau Pro7 ist ein Privatsender.	NOT	NONE	hasoc_2020_de_2740
1132328856327794689	RT @JustinKolo_: ein rt = ein "du hurensohn" ganz einfach	NOT	NONE	hasoc_2020_de_919
1131290585736896519	@xZoDDeLx @TimoReset_ Soll ich dir in den Arsch ficken?	HOF	OFFN	hasoc_2020_de_2852
1124383762433884161	@BenKTallmadge Scheisse!	HOF	PRFN	hasoc_2020_de_600
1127526604744351746	@HBrandstaetter @KURIERat Willkommen zurück aus der kurzen Babypause Frau @BMeinl	NOT	NONE	hasoc_2020_de_1419
1133102185322090497	RT @emrich_5933: „Kann ich meinen Rundfunkbeitrag als Parteispende steuerlich absetzen?“ #Grüne #europawahl2019 https://t.co/i6TflAqpEe	NOT	NONE	hasoc_2020_de_1139
1128980245674119173	RT @_MONE_1207: @Horst_Hutzel @lehmanowsky_ Bei manchen Wahlplakaten ist die Scheisse schon drauf #fckafd	NOT	NONE	hasoc_2020_de_3115
1134489304590364674	RT @welt: Auftritt in Harvard: Merkel ist vollendet, sie ist reif https://t.co/zq0KVrizfa https://t.co/mhQhW0nUzi	NOT	NONE	hasoc_2020_de_657
1130347865581207552	@ustralien @yungdsgnr Ich kann keine Argumente entgegenbringen- 🔽 Halt deine Fresse du scheiss weisser &gt;:(	HOF	OFFN	hasoc_2020_de_2245
1124777091692580864	also jetzt halt früher nicht	NOT	NONE	hasoc_2020_de_1333
1132747376576335873	@tukyabitch @deen321xyz scheiß freak	HOF	OFFN	hasoc_2020_de_1232
1133116047517736960	@Hope12086051 @freches_Weib2 😡 Hab ihn geblockt. Der Arsch.	HOF	PRFN	hasoc_2020_de_2785
1126166937220911105	RT @Picco94115398: Es gibt also doch noch Politiker die sich ein Bad in der Volksmenge trauen. Fr. Merkel wagt ja keine öffentliche Auftrit…	NOT	NONE	hasoc_2020_de_2550
1129320458262859778	RT @GegenKampf: @66Norweger66 @flengulu67 Auch wenn linken Antifa Nazis ihre Hakenkreuz Schmierereien hinterlassen, wird das den Rechten zu…	NOT	NONE	hasoc_2020_de_1376
1128401318475960320	@SvenjaSchulze68 Haltet ihr uns wirklich für so dumm oder seid ihr es?	NOT	NONE	hasoc_2020_de_3167
1133451923196141568	RT @GarugaaTheReal: Scheiß Dürre. https://t.co/A7Vm9vWxMk	NOT	NONE	hasoc_2020_de_461
1131560623425359873	@KittyVanWhiskas und nen geilen Arsch haben https://t.co/qZzZMTJEhL	HOF	PRFN	hasoc_2020_de_712
1134380294629396480	Du bist so ekelhaft, lösch dich einfach. Victim Shaming ist unter aller Sau genauso wie dein Niveau.	HOF	OFFN	hasoc_2020_de_1366
1125852104390840321	@HarzBlume Also, ich werd net vom Karma gefickt, liegt evt. Daran, das ich kein arsch bin aber wiederrum vom Leben… https://t.co/cT1j5lX1qO	HOF	PRFN	hasoc_2020_de_2252
1125380828190707717	@Alwayssomewher4 @AFGVeteran03 Gibt es bei euch auch so einen Grünen Wahnsinn? 🤔🤦‍♂️	NOT	NONE	hasoc_2020_de_1591
1132722537908133891	RT @rasenspiesser: Liberale in 🇪🇺 vor den Grünen 👍❤️	NOT	NONE	hasoc_2020_de_2768
1132718628829368323	RT @einhorngangbang: Die meisten sehen mich als Püppchen und sind dann überrascht, dass das Püppchen Ihnen ordentlich den Arsch versohlen k…	HOF	PRFN	hasoc_2020_de_2779
1133075031393800192	RT @HatinJuce: Man wählt zum Protest keine Nazis. Man wählt zum Protest keine Nazis. Man wählt zum Protest keine Nazis. Man wählt zum Prote…	NOT	NONE	hasoc_2020_de_479
1132141001873739778	RT @LuetzowQ: @Louiecrit Die SED ist zurück.	NOT	NONE	hasoc_2020_de_572
1131879596067041282	@Alexander_Umut @landhaustussy @tagesschau Nein,macht es bei Akademikern und Facharbeitern nicht besser,die Fachkrä… https://t.co/09q1KnoeIF	NOT	NONE	hasoc_2020_de_1201
1125413468272775168	RT @fabian_schmid: Was? Kurz meldet sich ECHT zu Wort, weil die SPÖ nicht wollte, dass auf ihrer eigenen Veranstaltung der Gabalier gespiel…	NOT	NONE	hasoc_2020_de_1694
1127326314158075904	RT @fratello_BB: #CDU-Wahlparty 2013: #Merkel entreißt Generalsekretär Gröhe die Deutschland-Fahne und entsorgt sie von der Bühne. Von da a…	NOT	NONE	hasoc_2020_de_931
1133787161311010822	RT @Hoshisato: "Du bist so lieb." "Ja, scheiß Erziehung." 😂	NOT	NONE	hasoc_2020_de_2860
1132941455432065025	Hat heute im linken Halswirbel auuuaaa es will das Unreine Nervenwasser bei mir sein	NOT	NONE	hasoc_2020_de_1091
1129083522029953024	@DasDritteBein @HeyHoHeyyy Wenn das Kind es freiwillig tut, diktiert der Islam überhaupt nichts. Dann ist es nämlic… https://t.co/sFFseOHHQ7	NOT	NONE	hasoc_2020_de_2964
1128272830150451200	RT @siegstyle: Im Grunde zeigt Verena Bahlsen nur, wie weit die Verbrechen der Nazis für die junge Generation schon entfernt sind. Da wird…	NOT	NONE	hasoc_2020_de_1207
1124373675141210114	@docboone71 Auch wenn seine Idee vom „grünen Stadion“ damals nicht umsetzbar war, hab ich eher die nicht mehr zu ki… https://t.co/7QfpG9f5P3	NOT	NONE	hasoc_2020_de_1115
1125136338016198657	@FrankSteinbach7 @ArasBacho Und du bist wie die Pest am Arsch.	HOF	OFFN	hasoc_2020_de_2166
1126233769269243904	@lmaoskar @xRapidSandro @scralex1899_ Hurensohn soll an Aids sterben hab den lappen immer schon gehasst	HOF	OFFN	hasoc_2020_de_778
1126164672309288963	Leute, hört endlich auf mich hintergehen zu wollen. Eines Tages komm ich euch immer auf die Schliche. Dumm, dass mi… https://t.co/zvQxoW3TGp	NOT	NONE	hasoc_2020_de_2682
1131504281335549952	RT @Echtjetzt5: Der Eiffelturm ist einfach wunderschön. 😊 https://t.co/9fcIQBhC8c	NOT	NONE	hasoc_2020_de_2596
1123678884464082945	RT @shlomosapiens: He, Linke - pssst: Hier sind mal echte Nazis, an denen Ihr Euch abarbeiten könnt. Nur so als Tipp. https://t.co/QnQfomDy…	NOT	NONE	hasoc_2020_de_1971
1129503728351010817	RT @beacon4711: Unsere Heimat wird missbraucht und vergewaltigt, die größte Strafe ist tatenlos zuzusehen! 🇩🇪😡🇩🇪 https://t.co/0McQX8wOVV	NOT	NONE	hasoc_2020_de_3092
1123675524860186625	Suarez verdient Millionen der soll sich mal die Zähne machen lassen der unsportliche Hurensohn	HOF	OFFN	hasoc_2020_de_76
1128696962352439296	Jetzt wird mein #Fötzchen richtig fertig gemacht. Erst bekomme ich einen #plug in meinen arsch und anschließend noc… https://t.co/uai3x2FjgU	HOF	PRFN	hasoc_2020_de_13
1123826075195383808	@publizistikon @roger896 Der Typ ist nicht normal. Dumme Aussagen ("Wer Islam scheisze findet, ist ein Rassist") un… https://t.co/vZ9fF6ScG2	NOT	NONE	hasoc_2020_de_155
1132249802119499776	@ZDF Sind das die neuen Tapeten???🤣🤣	NOT	NONE	hasoc_2020_de_2639
1133699382925287424	@BeSaLi_ @Naddl0r @endhaltestelle_ Dann zieh doch nur mal so versuchsweise den Kopf aus dem Arsch, wie man so hört wirkt das wahre Wunder.	HOF	PRFN	hasoc_2020_de_2320
1133412450596982784	@tagesschau Halt die Fresse.	HOF	PRFN	hasoc_2020_de_2693
1126785055983120384	@mdemanto Arsch. https://t.co/ssKkUNYIEd	HOF	PRFN	hasoc_2020_de_2326
1124277273249701888	Einfach kein Yuna-Fan	NOT	NONE	hasoc_2020_de_3375
1133425054468005888	RT swimswamnews: Deutsche Jahrgangsmeisterschaften:Tobehn mit Bestzeit #1 bei Junioren in Europa https://t.co/NFg0L3PBN1	NOT	NONE	hasoc_2020_de_1795
1130186149987782658	@vBqn1 @1325Leon @ElvteJan @RqndomABC_ @Skalter_Skal Dein mic is nicht mal scheiße hört sich genau so an wie auf ts	NOT	NONE	hasoc_2020_de_2338
1128084422027296768	@nprncbl @beibootpetri03 @_donalphonso Eieiei, ich wiederhole mich nur ungerne, aber wie gesagt „dumm wie scheiße“!	HOF	PRFN	hasoc_2020_de_2951
1126137472252039169	RT @mikemacapple: Ich möchte 1000 Polizisten und eine Polizeiwache auf einem Nazi-Konzert sehen. Gibts nicht? Sind keine Linken, sondern d…	NOT	NONE	hasoc_2020_de_1991
1130042134382501891	RT @seelenverbrannt: War salty. Er und Elli haben mich abgefuckt. &gt;:( https://t.co/5PgrRRtNBB	HOF	PRFN	hasoc_2020_de_513
1134116758103756801	@h3rzanh3rz das ist so mystisch einfach	NOT	NONE	hasoc_2020_de_1834
1130024061134884864	RT @zeitonline: Die Grünen fordern besondere Pässe für Klimaflüchtlinge. Aber gibt es sie überhaupt? Eine Begriffsklärung: https://t.co/wzk…	NOT	NONE	hasoc_2020_de_1727
1131535877027618816	porno deutsch mallorca nackter sexy arsch meine frau ficken nackte frauenkrper bilder https://t.co/iGtkrGKHZT	NOT	NONE	hasoc_2020_de_2464
1125830507890188290	RT @baertigen: Ey, ihr Mathegenies, ein Kind in der Familie braucht Hilfe und wir sind zu dumm in Mathe und haben kein GTR, kann das jemand…	NOT	NONE	hasoc_2020_de_11
1127512205728133121	will diesen anzug aber einfach 160€ yoooo https://t.co/uUv5mkN5Vh	NOT	NONE	hasoc_2020_de_2385
1133759508256350208	@unechtemax @mustiXIII IHR HÖRT EUCH BEIDE AN WIE KLEINE KINDER ALSO MAUL JETZT	HOF	PRFN	hasoc_2020_de_1613
1125412453255401474	🔥 Deutsche Telekom hat Probleme seit 04:20 nachm. CET. 👉 https://t.co/gmXT132s4u RT hat auch Probleme #TelekomDown https://t.co/jGSXL1eiyw	NOT	NONE	hasoc_2020_de_2342
1132377304762671104	deutsche transe video deutsche porno brutal penisbilder kostenlos gb schlampe 3some https://t.co/bBCK0FmFDB	HOF	PRFN	hasoc_2020_de_2304
1124387906423074816	@TheDouble6 @MSucrier @TheNewLife31 Man hört nur das leise Schnurpsen des Popcorns.	NOT	NONE	hasoc_2020_de_3025
1129378008291315712	RT @sixtus: Alman-Logik: Kruzifix in der Amtsstube: Kultursymbol Mädchen mit Kopftuch: politischer Islam	NOT	NONE	hasoc_2020_de_458
1131244217727160321	@sabine_beck @DanielKapp Eigentlich schon arg, wenn es beunruhigend ist, wenn man nichts von ihm hört ;-)	NOT	NONE	hasoc_2020_de_2685
1126146561292029953	@janboehm Armseliges, Nazi liebendes Geschmeiß, aber das war ja schon 1938 so und am Ende wollte man von nichts gew… https://t.co/K3GSYDQYdF	NOT	NONE	hasoc_2020_de_3445
1127273839237398534	@SawsanChebli Das Kopftuch ist zu einem Symbol, einem Synonym für eine rückwärtsgewandte Religion/Ideologie geworde… https://t.co/dYDKzTjihc	HOF	HATE	hasoc_2020_de_1007
1125759112459853825	RT @SPIEGELONLINE: Über die "Rattenlinie" flohen viele Nazis nach Südamerika, vor allem nach Argentinien. Juan Alberto Schulz hat seine Fam…	NOT	NONE	hasoc_2020_de_2435
1123990982641508353	RT @wavvyboi_: blowjob auf dem friedhof &gt;	HOF	PRFN	hasoc_2020_de_33
1134698944267804672	RT @houelle_beck: INTERVIEW ZUM POLITISCHEN ISLAM IN DEUTSCHLAND #Kopftuch in der Grundschule ist Zeichen einer "Indoktrination" https://…	NOT	NONE	hasoc_2020_de_1364
1128712632301707265	@NichtNilo wenn was ist meld dich einfach.	NOT	NONE	hasoc_2020_de_2344
1130227547780861952	RT @Frank_Pasemann: 📊Gehört der Islam zu 🇩🇪 Deutschland? Das fragte der @MDR_SAN in einer TED-Telefonumfrage. Es riefen über 15.000 Zuschau…	NOT	NONE	hasoc_2020_de_2961
1134003377682210816	@DennisKoch87 @tagesthemen @tagesschau Jezus ist auferstanden!! 😂 Hört auf ihn.	NOT	NONE	hasoc_2020_de_3502
1127659694212964353	RT @BL0CKVERSACE: deutsche nike https://t.co/6YMfWNae4X	NOT	NONE	hasoc_2020_de_252
1126204274910924801	@SerixuZ_ Aso stimmt ja meine Fresse Kopf ist aus wenn man gerade erst aufgestanden ist hahahahaha	NOT	NONE	hasoc_2020_de_212
1130330194970124292	RT @Gonzos_Bruder: Nazis im TV die mit den Nazis aus Österreich sympathisieren. Muss eine Demokratie so viel Nationalsozialismus ertragen…	NOT	NONE	hasoc_2020_de_2667
1132929824601890817	RT @helllud123: @tagesschau Die Grünen holzen uralte Wälder und damit hunderttausende Bäume ab - für "Klimaschutz"! Die Wähler der Grünen…	NOT	NONE	hasoc_2020_de_1843
1123592339195408386	RT @Euberu_Acuba: @COMPACTMagazin @Ofenschlampe Scheiß Diktatur. 😡	HOF	PRFN	hasoc_2020_de_2399
1131310710028406785	Ich genehmige mir abends ab und zu mal einen, um den Kopf zu zu machen, runter zu kommen und einfach mal fünfe grad… https://t.co/ecOeTx2Lrf	NOT	NONE	hasoc_2020_de_3385
1130727269763305473	@BengieS5 @FT_Redaktion Haben doch Schulz	NOT	NONE	hasoc_2020_de_172
1128341486708432897	@EichiBLUBBBEL @AFPde @greenpeace_de @ZDFheute 4. Merkel muss weg, CDU muss weg	HOF	HATE	hasoc_2020_de_1648
1126360596616761346	RT @LadyBitchRay1: Dann mach ich das mal für euch: Rapper GZUZ behandelt seine Ex Scheisse, betrügt sie auf besoffen mit anderen Frauen (gg…	HOF	PRFN	hasoc_2020_de_2884
1128592721336242176	😍🔥🌺💋MOJE NAJLEPSE SEXY HOTTTT🔥DUPE.😍😍💶🍬🍬😘 💙💛💙💛💙💛💙💛/🔊🔊🔊🔊🔊🔊🔊🔊🔊🔊🔊🔊🔊🔊🔊🔊🔊🔊🔊🔊🔊🔊🔊🔊🔊DANKEE.😛 D.H.NUR MEIN SEXY GEILER ARSCH… https://t.co/aokE4Xr169	HOF	PRFN	hasoc_2020_de_915
1125049331365576709	RT @AliceWo18626168: Das ist "Deutsche" Justitz. Nur noch AfD !!! https://t.co/aUiWdKZtTF	NOT	NONE	hasoc_2020_de_968
1132701679638519808	RT @eraser_org: Echt jetzt, ihr habt das grüne Verräter- und Lügenpack gewählt? Wie oft lasst ihr euch noch verscheißern? #Europawahl	HOF	HATE	hasoc_2020_de_2417
1133659088250916864	@realbuschkamel Frau Merkel!	NOT	NONE	hasoc_2020_de_1782
1124649878456500224	Ja, ich bin fett aber intelligender als du, denn ich muss andere nicht beleidigen... du Stück Scheiße!	HOF	OFFN	hasoc_2020_de_1548
1134139919062982658	RT @Sachsen_Rechte: Bei von Linken, insbesondere den Grünen, positiv besetzten Themen wie Klimaschutz, Gleichberechtigung oder Kindererzieh…	NOT	NONE	hasoc_2020_de_3181
1124895396218724353	@FunkhausZorra @PolitikStandard Hat Hitler hat auch gesagt.	NOT	NONE	hasoc_2020_de_1831
1128503525259063296	RT @schweizok2: #Merkel sieht Deutschland als Einwanderungs- und Integrationsland !!! https://t.co/X2UcnYYGrv	NOT	NONE	hasoc_2020_de_2150
1128898943272804352	Und dann fährt man schon zusammen zum Arbeitsplatz. RTL verbindet Idioten.	NOT	NONE	hasoc_2020_de_2619
1125106248083550208	@fu_k_you Für viele ist das für den Arsch	HOF	PRFN	hasoc_2020_de_2032
1125702254479040519	@androidcentral IPhone 5 &gt; Huawei Mate9 &gt; Huawei Mate20x	NOT	NONE	hasoc_2020_de_396
1131267512870604800	ich kann es einfach nicht fassen wie Deutsch Rap noch mehr Hurensohn geworden ist seitdem	HOF	PRFN	hasoc_2020_de_3178
1126128567736307715	Geiler Scheiß! #Scuderi	HOF	PRFN	hasoc_2020_de_1751
1134546728814895104	Free dicke frauen, deutscher sohn porno. Porno gratis espol! porno khentay rusalochka. https://t.co/kBkT2vKrQU	HOF	PRFN	hasoc_2020_de_3397
1133622652336246784	Käffchen und dann mal das Gesicht reparieren. Treff mich ja bald mit @SchwarzeLoewe 🤣	NOT	NONE	hasoc_2020_de_3203
1126768220084424704	@HolgerEwald1 @China_Welt_News denen geht der arsch auf grundeis	HOF	PRFN	hasoc_2020_de_2845
1128971286615474176	Hallo Christoph, hey! Ich schwör', Du bist der allerbeste. Jetzt friss mal deine Crunchy Nuts und halt die Fresse.	HOF	OFFN	hasoc_2020_de_2054
1130212456687656962	RT @sasiiii000: Ich musste es einfach tun ahhh 😩wollte schon immer mal ein @xPandorya Fanart machen 💙 das Original ist bei @Eosandy zu sehe…	NOT	NONE	hasoc_2020_de_2983
1123930517571809282	Mathe ist einfach	NOT	NONE	hasoc_2020_de_3154
1131979881854713858	RT @Iunahri: Ja blabla jeder Herd ist unterschiedlich ja meine Güte dann drop halt Temperatur in fucking Celsius du Hurensohn	HOF	OFFN	hasoc_2020_de_2865
1128766340372795392	RT @starlucycat: Retweet - Wenn du meinen Arsch liebst😘 https://t.co/FDNwJigPhk	HOF	PRFN	hasoc_2020_de_1878
1124044506138120192	1. Ich werde GoT erst schauen wenn es kein Arsch mehr schauen wird. 2. Mein Penis ist halb so lang wie das doppelte… https://t.co/A72qK5FSFD	HOF	PRFN	hasoc_2020_de_403
1129743625766821890	@FCBayern @heidiklum Ich muss kotzen	NOT	NONE	hasoc_2020_de_1199
1127164028156035073	RT @VogelSabine: @Alice_Weidel @ainyrockstar Solche Fachkräfte brauchen wir hier nicht !!! Die Moslems leben doch noch in der Steinzeit, al…	HOF	HATE	hasoc_2020_de_1414
1133786754480316420	29/5 #AntwerpAirport 19:10 Grove schendng #skeyes (#Belgocontrol) rgls? (?&gt;?) 3257ft/m (max 1000)… https://t.co/giR7ZBBqCU	NOT	NONE	hasoc_2020_de_2146
1133033763649327106	@Snake_Kaa Wo kommen denn jetzt plötzlich die ganzen Nazis her? Hat man die jetzt erst aus russischer Kriegsgefange… https://t.co/drWn1e2kgT	NOT	NONE	hasoc_2020_de_264
1133060082915336193	@ZDFheute Linke Indoktrinierung an Schulen und Unis. Dauerwerbung der Medien für die Grünen.	NOT	NONE	hasoc_2020_de_3446
1125012287289425921	RT @krstdt: Die @PolizeiSachsen hat die Bekleidung der Schüler im linken Bild als Uniformierung gewertet. Die Bekleidung der Nazis rechts h…	NOT	NONE	hasoc_2020_de_2605
1129449173043093505	RT @maxheld: @civey_watch umm könnte das nicht einfach korrektes bayesianisches updating sein?	NOT	NONE	hasoc_2020_de_613
1128056206931546112	Sachsen-Lady: ..du BASTARD!!! Na los, du Dreccksack stehst doch drauf,,Schau wie er seinen Kolben in meinem Arsch v… https://t.co/HDutErGi7Q	HOF	PRFN	hasoc_2020_de_950
1129759123703308289	Scheiß bayern aller	HOF	HATE	hasoc_2020_de_3189
1133021679855259648	@DracheSchaut Es ist einfach zu herrlich. Wie sehr er das Streamen mittlerweile hassen muss. Aber es gibt einfach n… https://t.co/yccxHpLy4L	NOT	NONE	hasoc_2020_de_2194
1125869431031201792	Nur für Klopp! lfc ist noch scheisse!	NOT	NONE	hasoc_2020_de_499
1133835114797064200	@skt_johann @NoDumbAlliance @Flowerpowertric @kanzleramtsmann @andree_dominik @tagesschau @JFliegenschmidt @quazanga Dann halt. Schüssi!	NOT	NONE	hasoc_2020_de_72
1128889464141619200	@areimanios @MartinSonneborn Arsch am Mittwoch 😂... und wieder bestätigt bekommen, dass ich bei der Briefwahl alles… https://t.co/goQGKCzOzJ	NOT	NONE	hasoc_2020_de_3006
1128375137626144769	RT @helllud123: Der Linksfaschismus marschiert: Brandgefährliche Linksextremisten stilisieren sich dummdreist als Opfer und linke Gesinnung…	NOT	NONE	hasoc_2020_de_2975
1134527355328847873	@Baron_Snoopy Hahahahaha, wir verstehn uns einfach 😏	NOT	NONE	hasoc_2020_de_1304
1132451640408195072	@ClevnestFN Beschäftige dich doch einfach mal mit was sinnvollem👌	NOT	NONE	hasoc_2020_de_199
1123580687439859713	@welt #borispalmer gehört zu den intelligenteren #Grünen ... das kann Frau Roth nicht ertragen ...	NOT	NONE	hasoc_2020_de_1912
1127358824204075020	war halt echt toxisch und ich hab leuten damit echt wehgetan aber idk	NOT	NONE	hasoc_2020_de_2564
1125135457220743174	Ich bin nicht dumm. Ich bin nur dämlich. Und ich bleibe es.	NOT	NONE	hasoc_2020_de_2041
1134068259391758337	@TorstenBeeck Echt, #Amthor, Moslems können die Nationalhymne nicht singen? Die CDU zerstört sich selbst. Wir müsse… https://t.co/vHJ85LVClD	NOT	NONE	hasoc_2020_de_560
1128558978177339392	RT @bax_daniel: Die Schulpflicht ist „heilig“? Das muss dieser „säkulare Islam“ sein, von dem man so viel hört. https://t.co/fKIfCJcdE3	NOT	NONE	hasoc_2020_de_688
1132269720844034048	RT @ProletDO: 14:52 Hörder Neumarkt. Und wo sind jetzt die Nazis? #do2505 #nonazisdo #nonazis	NOT	NONE	hasoc_2020_de_1997
1127150228891738112	Hühner-Hof-Fest Steuden: 1. Deutsche Nudelkönigin Sandra I mit ihren Nudelkönigen... https://t.co/d39OTW0rmT	NOT	NONE	hasoc_2020_de_853
1124643511503151104	Sowas von lächerlich. Scheiß @polizei_nrw_bo	HOF	HATE	hasoc_2020_de_2120
1132704934401630208	Was ist eigentlich im Moment mit @TheRocketBeans bei @waiputv los. Ich hab schon seit Tagen nur Schwarzbild. Ab und… https://t.co/HKId1fAHSh	NOT	NONE	hasoc_2020_de_1750
1132685590284165120	@089_32168 Naja, für die Konservativen gibt's doch jetzt die Grünen?	NOT	NONE	hasoc_2020_de_3494
1130738426599411712	@Lara_CumKitten Auf alle Fälle. Spielen damit macht Spass und macht ihren Arsch geil für meinen Schwanz	HOF	OFFN	hasoc_2020_de_1514
1125495840209031170	@P1nkL Ja man hahah was ein scheiß xD	NOT	NONE	hasoc_2020_de_961
1129421717133242369	#F1 Max Verstappen Nicht mehr mit Kopf durch die Wand https://t.co/2Xx1ddEUfu https://t.co/gae0N28kt9	NOT	NONE	hasoc_2020_de_558
1132997050927374338	@sefi99 @MartinSonneborn Als ob ich so dumm wäre und eine der Spaßparteien wählen würde. Die Satirepartei die PARTE… https://t.co/v19xiYcuu2	NOT	NONE	hasoc_2020_de_3149
1133598929352892417	Klar gibt es Leute die lügen, dass sie sowas durch gemacht haben.. Aber das dann auf jeden so umzudenken ist einfach nur scheiße.	NOT	NONE	hasoc_2020_de_1572
1132704204592693252	@PicturePunxx Wie war das mit dem ‚im Strahl kotzen‘?	NOT	NONE	hasoc_2020_de_2814
1125470426916970497	RT @pinkcrazypony: Und hier das Orginal. Ahmad , 2 Frauen ,6 Kinder leben in einem Haus 5 Zimmer , 2 Bäder und eine Küche. Bezahlt vom Job…	HOF	HATE	hasoc_2020_de_170
1128441558603268096	RT @ichalter: ich hasse meine eltern ohne spass diese dummen hurensohne ich bin fucking 14 und die heulen rum wenn ich EINE fuxking xanax n…	HOF	PRFN	hasoc_2020_de_1317
1127859208882458625	RT @UFxdl: @burger_ein @politikstube Die ganzen Frauen und Kinder.. 🤔🧐	NOT	NONE	hasoc_2020_de_2914
1134113226495614976	@BengieS5 @Korny382 @19Micha09 Dachte ich auch grad. ^^ Aki sacht dasselbe, aber Sammer ist der Arsch 😁	HOF	PRFN	hasoc_2020_de_3492
1131766807013056512	🎬 MOVIE DEAL! Merida: Legende der Highlands jetzt für 5,99 € (von 11,99 €) in #iTunes. &gt;https://t.co/cL4FnYfpQ5&lt; RT	NOT	NONE	hasoc_2020_de_1506
1131309615289982982	Die Tonspur zum Zeitgeschehen. Press Play! &gt; https://t.co/pi1TVzTAx0 https://t.co/EbHnG6vuAB	NOT	NONE	hasoc_2020_de_358
1126067737728413696	#Milfs #Nylons #Masturbieren #DirtyTalk Pack ihn aus und wichs mit mir! https://t.co/TcfKWlkhIs	HOF	PRFN	hasoc_2020_de_1876
1133112524298248193	RT @ulrabiart: Ich möchte das Wort "Fäkalgewitter" als deutsche Entsprechung des Anglizismus "Shitstorm" etablieren. Um dieses Ziel zu er…	NOT	NONE	hasoc_2020_de_282
1132944760526770178	@TheTickit @sonnensicht ach gottchen. rassisten und nazis ist doch mittlerweile inflationär... gähn die grünen ide… https://t.co/1hkSeNHK5W	NOT	NONE	hasoc_2020_de_151
1127607303165837312	Ich möchte ja keine Stereotype malen,aber: Frau zu Mann: hab dich lieb . (He: i know,ich bin einfach eine geile Sau… https://t.co/JZ51C2zIlp	HOF	PRFN	hasoc_2020_de_188
1132344513668763648	geile rztin deutsche familien orgien pornos deutsche kino porno haarige muschifotos https://t.co/KsB557V3ff	HOF	PRFN	hasoc_2020_de_1957
1127533588252065792	Gedson Fernandes &gt; Gelson Fernandes. https://t.co/ozc4YmVc9Y	NOT	NONE	hasoc_2020_de_1056
1130919029118513152	RT @59karli82: @nicolabeerfdp: Auch der deutsche Finanzminister profitiert von der Niedrigzinspolitik. Das stimmt. Sie wirkt wie eine Art V…	NOT	NONE	hasoc_2020_de_578
1127544619296796672	@morgenpost Sie müssen sich erst ein mal um ihre eigenen linken Chaoten kümmern	NOT	NONE	hasoc_2020_de_355
1129442109822570496	RT @Schlawiner8: @EMMA_Magazin @SonjadelaRosa7 @MEEDIA Die nützlichen Idioten sind sie linken Verteidiger des Islam. Früher haben die Linke…	NOT	NONE	hasoc_2020_de_2486
1124984202225750017	RT @AndreasStraub: Den Indianern luchste man mit Glasperlen und Feuerwasser das Land ab.😱 Uns einfach mit Worten: »Rassist« und »humanitär…	NOT	NONE	hasoc_2020_de_3117
1132348162734284800	RT @lukkkkkkas: Deutsche Sashimi https://t.co/mFRa3FrMIO	NOT	NONE	hasoc_2020_de_2347
1126889993295679488	RT @ChipundCharge: Spektakulärer Tiebreak zwischen Dominic Thiem und Roger Federer. Federer hatte schon Matchball, musste sich aber 11-13 g…	NOT	NONE	hasoc_2020_de_441
1131174483224612864	@ChanyeolBucky tu es einfach :))	NOT	NONE	hasoc_2020_de_3113
1124071139968475138	@WokeUpCry1ng @juukichiix ist das nicht sowieso übelst der heuchler?	NOT	NONE	hasoc_2020_de_686
1132727264871895041	@allaboutnext Die paar Minuten pack ich noch. 😁	NOT	NONE	hasoc_2020_de_3296
1128693950842384386	RT @DTrnsfrmtn: @Hartes_Geld Tierschutz? Mitgliedsantrag der Grünen ist raus.	NOT	NONE	hasoc_2020_de_2169
1124383422695264256	@Brettwelten Das Grinseschaf im grünen Gras.	NOT	NONE	hasoc_2020_de_519
1125812761819262976	ACHSOOO DEUTSCHE https://t.co/K0yRrtc9Y9	NOT	NONE	hasoc_2020_de_2024
1126781830571724801	@CaptBLWillard @welt Und die politik der politikverdrossenheit ist etwa besser? Europa ohne merkel war eine politik… https://t.co/TVmrJMaTUc	NOT	NONE	hasoc_2020_de_1568
1131563622361182209	Für alle Neuköllner*innen, die immer noch aufs Wohngeld warten: Berlinpass kann man ab sofort bei Vorweisung der Ab… https://t.co/v6kDqFSt9b	NOT	NONE	hasoc_2020_de_2892
1131571251774984192	@g4rl1n nIcHt JeDeR rEiChEr IsT sChEiSsE	NOT	NONE	hasoc_2020_de_1718
1123693174474649601	@arsenal_lady @Eusebio_14 Aber echt, halt's Maul!!	HOF	OFFN	hasoc_2020_de_698
1132977241233743872	ich möchte meinen statik. dein weib hat einen fetten arsch und ist fettleibig. ich bin größe 36 und möchte die auc… https://t.co/e2ECnD2O8R	HOF	PRFN	hasoc_2020_de_2873
1125261105985654784	@Pyramoscgn1 @tagesschau Das hat nichts mit meiner Religion zu tun. Ich faste nicht und lebe nicht nach dem Islam… https://t.co/XZmVlq4tCc	NOT	NONE	hasoc_2020_de_2223
1131448396424908801	@lawyerberlin @Straw_Berry_ots @HeikoMaas Dieser kleine Wichtigtuer, unter Merkel dürfen die alles	NOT	NONE	hasoc_2020_de_2372
1123660727334637571	RT @Halbblutjurist: „Ossi“-Bashing wird die Nazis auch nicht verschwinden lassen.	NOT	NONE	hasoc_2020_de_269
1132701889357914112	@EhrenmannErich der deutsche kocht sein chilli mit ketchup	NOT	NONE	hasoc_2020_de_1894
1131820896778371072	RT @Korallenherz: Nazis sind Nazis weil sie Nazis sind. Nicht dumm, blöd, krank, irre oder oder oder. Lasst das.	NOT	NONE	hasoc_2020_de_2123
1130008856757788677	@StBrandner Gar nicht, unsere Politiker sind nur Macht - und Geldgierig. Das Deutsche Volk interessiert sie nicht im geringsten.	HOF	HATE	hasoc_2020_de_802
1126852231968509953	#FF Tipps =&gt; @immofux @Hoteltagebuch @ImmoRogers @Makler1Muenchen @RAMathiasMuench @IMMOVATION_AG @stadtvermieter… https://t.co/KcBJLbAdv8	NOT	NONE	hasoc_2020_de_999
1126209744279146501	Seriously der Anxiety in den Arsch zu kicken und einfach zu machen, i felt high AF. Ich bin so stolz auf mich selbe… https://t.co/3e0gmh51TI	HOF	PRFN	hasoc_2020_de_3219
1131961976358359041	#NWBRS1 +++ Ausfall +++ Bremen-Farge (ab 21:41) -&gt; Bremen-Vegesack (an 21:59) am 24.05.2019 Grund: Betriebliche… https://t.co/5pd4dQmMdU	NOT	NONE	hasoc_2020_de_147
1132615490885607424	free sey kostenlose prons joujzz nakte frauen vidios anal free https://t.co/npriwMFNme	HOF	PRFN	hasoc_2020_de_1015
1132735632512606208	@faint_visions Copy paste einfach	NOT	NONE	hasoc_2020_de_1170
1132286300952944640	ZDF &gt; ARD	NOT	NONE	hasoc_2020_de_3005
1125796823464067072	@tagesschau Scheiß auf die EU! 🖕	HOF	HATE	hasoc_2020_de_2804
1128194971302019073	Weil ich es gerade live erlebe ein kurzer Sitzplatzknigge im Zug: Pro Arsch nur ein Sitzplatz. Taschen brauchen kei… https://t.co/xdU9eDwkFr	HOF	PRFN	hasoc_2020_de_771
1123862037136801793	@welt WS ist das für ein Spinner.	NOT	NONE	hasoc_2020_de_2945
1124649886832574466	RT @SomeXT: Merkels Migrationspolitik hat schon mehr Opfer gefordert als die supergefährliche Kernkraft vor der sie uns gerettet hat..	NOT	NONE	hasoc_2020_de_608
1134203617970466816	RT @AERZTE_NEWS: Die deutsche @BAEKaktuell hat einen neuen Präsidenten. https://t.co/jw1ggL7E26	NOT	NONE	hasoc_2020_de_2749
1130006700893888512	Manche Diskussionsbeiträge zu #Strache (war halt im Urlaub, war halt betrunken, war halt "Blödsinn") haben ja auch eher was theologisches.	NOT	NONE	hasoc_2020_de_1570
1128655052904726529	Ich glaube Frau Merkel erzeugt den größten Skandal in der Geschichte von Europa! Was hier immer mehr zu Vorschein t… https://t.co/QED4hAZJiV	NOT	NONE	hasoc_2020_de_2381
1126144707401342977	Wie sinnvoll wäre ein Kopftuch-Verbot an Schulen? Alice Schwarzer: “Das ist kein Kleindungsstück, d #islam #kopftuch https://t.co/UK36VrGkxO	NOT	NONE	hasoc_2020_de_2193
1126870871455535104	RT @_NameVergeben: man erkennt lgbt+ leute daran dass sie immer auf dem boden sitzen FAKT	NOT	NONE	hasoc_2020_de_2979
1125867023525924865	Krasser Scheiß 😂 #LIVBAR	NOT	NONE	hasoc_2020_de_806
1131940157593137153	RT @CMS_Stars: 🎥 Neuer #clip Voll in den Arsch auf ⭐ Natalie Alba ⭐ verkauft ✅ 👉🏼 https://t.co/dOJ1rnfsI7 👈🏼 via @PornStarsCMS #CMS_Stars #…	HOF	PRFN	hasoc_2020_de_419
1127498544850640896	RT @mehrkill: Deutsche Bahn in #Merkel #Deutschland #Palmer #Krimigranten @DB_Bahn @DB_Presse https://t.co/APmi06jbKI	NOT	NONE	hasoc_2020_de_2774
1124717616461963265	Mit dem Rücken zur Wand schafft Higgins es mit einem #Zäntschurie zum Decider! Come on, John! 👏🏼 #147sf	NOT	NONE	hasoc_2020_de_2313
1133791666001907712	Weiber gratis, porno deutsche anal ausgenutzt. Deutschsprachige pornoclips, sinnlicher sex deutsch! https://t.co/JpQIHJI19u	HOF	PRFN	hasoc_2020_de_2043
1131517518584131584	RT @einhorngangbang: In einem Paralleluniversum ist Sylt eine Frau und hat ein Foto von deinem Auto am Arsch kleben.	NOT	NONE	hasoc_2020_de_1770
1132928725719429120	RT @HolgerEwald1: Partei-Mobbing? Deutsche Öffentlich-Rechtlichen färben FPÖ braun https://t.co/BmZbTsVwSu via @China_Welt_News	NOT	NONE	hasoc_2020_de_209
1131799711348867072	Mein Hirn: Du solltest dich beeilen. Ich: *duscht* Mein Hirn: Es wird Zeit. Ich: *macht Frühstück* Mein Hirn: H… https://t.co/KOYkgmHHNd	NOT	NONE	hasoc_2020_de_706
1132729127147065344	RT @liba443: 4 verpasste anrufe von mama ausländer: scheiße ich werde sterben wenn ich wieder zuhause bin deutsche: https://t.co/lseP4V…	NOT	NONE	hasoc_2020_de_495
1133705598875394051	@FrxnckIsDead naja wenn du kein makeup trägst weil es “schwul” ist usw ist das schon nen scheiss mindset, aber wenn… https://t.co/r0KRxDEETv	NOT	NONE	hasoc_2020_de_1509
1133858883896840192	@HeyItsMeBuboy Die Tassenhalskette einfach nur Meme	NOT	NONE	hasoc_2020_de_1063
1124698624632545281	"Ach scheiß FridaysforFuture! Die sollen erstmal lernen gehen! Alles ungebildete Schulschwänzer da. Alle dumm" ... *schnauft genervt*	HOF	HATE	hasoc_2020_de_3139
1131977151387975680	@AnRah83 Genau so ist es, das wichtigste ist immer das Herz, nur die meisten schauen immer nur auf den Arsch oder sonstwo, echt schade...	NOT	NONE	hasoc_2020_de_1945
1128217717012672513	RT @DPlautzi: Ein Rülpser ist ein Magengas, das den Weg zum Arsch vergas.	HOF	PRFN	hasoc_2020_de_1833
1124446643460411392	@fiqqqqqhure JA BITTE IST HALT ECHT SO AKSKSHS scheiss hurensohn	HOF	PRFN	hasoc_2020_de_2631
1130734639121879040	RT @SebastianHampel: Scheiß Dürre https://t.co/HvBnHbDCaS	HOF	PRFN	hasoc_2020_de_3001
1126051476428795904	@indiestrolche @IndieArenaBooth "Booth" =&gt; "Stand" =&gt; maskulin =&gt; "Der Booth" =&gt; "Der IAB" Das wäre meine Logik :-)	NOT	NONE	hasoc_2020_de_2738
1129304029144727552	RT @zeitonline: "Russland gehört in den #Europarat". Bundesaußenminister Heiko #Maas hat vor dem Ministertreffen des Europarats in #Helsink…	NOT	NONE	hasoc_2020_de_2746
1123533115631263745	RT @Heiko31086906: Wie heißt es immer so schön.... Vor allem, wenn man für solche dummen Sprüche bekannt ist. "Einfach mal die Fresse halt…	HOF	PRFN	hasoc_2020_de_3184
1127946253239631873	RT @KittoDario: Erst @Stephan535 und jetzt @Buje78. @TwitterDE, lasst den Scheiß!	NOT	NONE	hasoc_2020_de_718
1125474310850846720	@berxe @i_am_enes Die hure hat vor meinen Augen einen Hurensohn geküsst	HOF	PRFN	hasoc_2020_de_409
1124779016865632258	@Lil_Juri der sieht aus wie ein hurensohn	HOF	OFFN	hasoc_2020_de_1381
1131624167135162372	besoffene frauen porno deutsche sklave porno onlien beeg deutsch porno juegos putas gratis https://t.co/43SEAotN9x	HOF	PRFN	hasoc_2020_de_1835
1125332732106760192	wir haben halt nen austauschschüler aus den usa hier und er versucht vieles auf englisch zu übersetzen	NOT	NONE	hasoc_2020_de_692
1131508261730029568	@Ralf_Stegner um die Mehrzahl der Kommentare hier zeitsparend zusammenzufassen: Wir lassen das jetzt einfach mal d… https://t.co/jXkttOfkzQ	NOT	NONE	hasoc_2020_de_1975
1129884122355261445	@BilgiliUeretmen @Sultan44613857 Ach lass ihn, Bilgili.. Der Typ ist nicht mehr zu retten. Der ist so blöd, der wei… https://t.co/OXeVkg14h7	HOF	OFFN	hasoc_2020_de_854
1124240153655107585	@TheZ0ldyck Ich habe diesen Dreck schon hinter mir. Und dir noch FAITO! https://t.co/3HqJA35sm7	NOT	NONE	hasoc_2020_de_2485
1124851469260394496	Volkswagen Gabriel St-Laurent. https://t.co/fn0RU41OMY	NOT	NONE	hasoc_2020_de_929
1124788131088171009	@JanMod_ @elrobtossohn @Gitarre3 Boah bist du dumm	HOF	OFFN	hasoc_2020_de_305
1129889969236062208	@luxiboxDE Das war's dann komplett mit mir.. Ich bin schon dumm, wenn ich den erst besten Hashtag nutze, der mir vo… https://t.co/TjiSu3IVOS	NOT	NONE	hasoc_2020_de_3266
1134056964122693633	@tagesschau Kann #Rezo nicht ein neues Video von den linksradikalen Grünen produzieren lassen, um unseren Rechtssta… https://t.co/LQmX8QIvXJ	NOT	NONE	hasoc_2020_de_2555
1132811494901600258	Sahur fickt einfach dein Schlafrhythmus	HOF	PRFN	hasoc_2020_de_2476
1125099168077418496	@Loay_Mudhoon @raz_u @SPIEGELONLINE Weil islam andres nicht kennt...	NOT	NONE	hasoc_2020_de_1780
1134351475558293504	@ChristianRuch @politifinnmark ... Und deutsche Eierdiebe 😂	NOT	NONE	hasoc_2020_de_1919
1124316053771886593	@SawsanChebli @katarinabarley @UdoBullmann @gabischoff Mon Dieu, die Roten sind wirklich Idioten !	HOF	HATE	hasoc_2020_de_2463
1125474042386046976	Send playlist &gt; send nudes	NOT	NONE	hasoc_2020_de_594
1126049354110963713	@AnnarosaBrito Ob grün, rot, gelb, schwarz oder braun, ich tue einer korrupten und kriminellen Politkaste niemals t… https://t.co/Xpriclxe3t	NOT	NONE	hasoc_2020_de_540
1129445154916577281	@Adam_und_Steve Man, echt doof, du stampft vor Wut bestimmt schon richtig dolle auf den Boden.	NOT	NONE	hasoc_2020_de_89
1134626722580746245	@SeelennachtInfo Willkommen zurück in Leipzig. 🖤	NOT	NONE	hasoc_2020_de_109
1132655055767769088	Sexy frauen stripen, gratis sexfilm ansehen. Hart anal deutsche frau ltere frauenpornos https://t.co/7gedxDA5p5	HOF	PRFN	hasoc_2020_de_2864
1124586875795189761	Jeder erfindet sein eigenes Scheinleben Wie viel Mut brauchst du für den Scheiß, den du dir einredest?	NOT	NONE	hasoc_2020_de_1976
1131941201987325953	Piss dem Schwein ins Maul https://t.co/W4bY2n32su https://t.co/qmbktWeU7L	HOF	PRFN	hasoc_2020_de_175
1128127099049598976	@Vivian_Veganer @RainerWinklerDE geplatzt? arsch aufgerissen?pensi bei wichsorgie explodiert?	HOF	PRFN	hasoc_2020_de_117
1124380176287182848	RT @QuirinWeber: Was unterscheidet die jungen Grünen von der jungen #AfD? Die #Grünen hatten zwar #Zorn, aber nicht #Hass hervorgerufen. Ku…	NOT	NONE	hasoc_2020_de_135
1124769575491571712	RT @Heiko31086906: Deutschland und die Deutschen sind scheiße, alles scheiße, alles Nazis. Warum sei ihr dann in diesem unser Land! Richte…	HOF	HATE	hasoc_2020_de_51
1130927937832849408	@lissy__15__B Extra ni- ach du scheisse bin ich dumm	HOF	PRFN	hasoc_2020_de_1428
1125791580571488256	@Archiphilologus modal Archi einfach nur modal	NOT	NONE	hasoc_2020_de_1357
1133005355632529408	@Rockstarleben Ich halte mich mittlerweile echt zurück. 😇	NOT	NONE	hasoc_2020_de_1687
1128698564589363200	RT @sueszling: "Kein Geld??? Such dir doch einfach nen Job hahahah" das ist einfach der most privileged shit sorry not sorry	NOT	NONE	hasoc_2020_de_3249
1124627099174756352	@iMarioR @wahlborn @iKnowReview @BlackPantherRav @LemmysTechKiste Samsung ist das Image einfach scheiß egal, solang… https://t.co/U7vPyBVaJG	HOF	PRFN	hasoc_2020_de_2575
1123499053696847872	Tritt sie frühzeitig zurück? Merkel spricht nach Gerüchten ein Machtwort https://t.co/FL0KiSion3 #gipfelkanzlerin	NOT	NONE	hasoc_2020_de_400
1129858402878984195	RT @AufgewachteWelt: Stegner, Lauterbach, Nahles, Hofreiter, Maas, Spahn, Schäuble, Seehofer, Barley, Scholz, Schulz, Habeck, Özdemir, MERK…	NOT	NONE	hasoc_2020_de_2224
1133797340882624517	RT @telepolis_news: Deutsche IS-Anhänger: Jesidinnen stellen Strafanzeige gegen Barley und Seehofer https://t.co/y1XbBPWKaD	NOT	NONE	hasoc_2020_de_23
1124047026948399105	@_Unterwelt_ *kuschelt sich einfach etwas an*	NOT	NONE	hasoc_2020_de_761
1125496448353800195	Die „rechte Blase“ gibt es nicht! Wohl aber das linke #ANTIFA ASOZIALE PACK!!! ...und dessen nichtsnutzige Unterstü… https://t.co/loUMaQHEYP	HOF	OFFN	hasoc_2020_de_332
1131446987159678976	@nicolangecdu Klimaschutz nicht da, aber massive Kohleabbau. Armee am Arsch. Protest als Mob bezeichnen. Jetzt Yout… https://t.co/Its0yoHvCw	NOT	NONE	hasoc_2020_de_725
1134205090141802499	@wutuniverse Kuss zurück	NOT	NONE	hasoc_2020_de_3215
1125373366536409093	@HeldenWieIch @zeitonline Deutschland war halt schon immer so ein MINT Eliteland. 🤣 Wenn dir das Schulsystem nicht… https://t.co/EeiZW0kFR2	NOT	NONE	hasoc_2020_de_2603
1132350545094750209	@GamerBr0ski Richtig dumme Trikotwahl...	NOT	NONE	hasoc_2020_de_22
1128631212480790528	@TheSkender @Virgen48 @Uwe_Junge_MdL Warum diskutieren wir dann mit Linken und Moslems?	NOT	NONE	hasoc_2020_de_2731
1132689331620077568	@ZDFheute 💚💚💚💚💚💚💚Glückwunsch an die Grünen! ❤️🏳️‍🌈🌈🎗️🇩🇪☮️🍀🌳 das war ja durch #FridaysForFuture schon denkbar, dass… https://t.co/o3nyr3r0K2	NOT	NONE	hasoc_2020_de_804
1133079083112382465	Der Hashtag #NiewiederCDU impliziert, dass ihr schon mal das verlogene Dreckspack gewählt habt. Echt jetzt?!	HOF	HATE	hasoc_2020_de_2421
1123952055310270470	@AliCologne Gemeinsam mit den Linken, wird es der politische Islam und damit die Scharia schaffen, sich in Deutschland einzuschleichen	NOT	NONE	hasoc_2020_de_2197
1132943967790731264	RT @KarlaKnows: Haben die alle gesoffen oder wieso sind die so blau? Ist das noch Protest, ist das schon Überzeugung oder ist das einfach n…	NOT	NONE	hasoc_2020_de_2190
1132862552185233408	@uhl_edu Stimmt - schon verdrängt 😂	NOT	NONE	hasoc_2020_de_772
1127467041429053441	@JK_der_Hase Rauche schon sehr lange nicht mehr. Aber: 8€ für Verglimmendes? Und die anregende Verpackung mit "Gesc… https://t.co/Vuk428rEB4	NOT	NONE	hasoc_2020_de_1682
1129718699013709824	Och Gottchen... HALT DIE FRESSE, VERDAMMT!	HOF	PRFN	hasoc_2020_de_3042
1130754985724174336	Investeringsfirma steekt geld in blockchain startup Bloxroute -&gt; https://t.co/vWcnLYAWZs	NOT	NONE	hasoc_2020_de_2609
1129789549184524288	@postmichel1 @tagesschau Das muss Kurz gar nicht, dazu braucht jeder halbswegs mit Verstand ausgestatte Deutsche nur vor seine Haustür gehen	NOT	NONE	hasoc_2020_de_3477
1133929578894909440	Deutsche mature wird vergewaltigt, deutsche vergewaltigt porno. Richtig geile votzen, bionde gratis sesso. https://t.co/umE0trk2Re	HOF	PRFN	hasoc_2020_de_3403
1130094550586929152	@kvinna_hopp @SeverinBrandis Invasoren sind das😂	NOT	NONE	hasoc_2020_de_1621
1133653212035256320	Ahahahaaaa 😂 Zweitstärkste dürfen sie werden die Grünen, dann ist "die Welt grün in der wir alle leben wollen". Abe… https://t.co/IS6Vkl6AxY	NOT	NONE	hasoc_2020_de_3497
1127921435563974656	@blackyellowL0ve @LeTrabert @BeHaind Bist du dumm..	NOT	NONE	hasoc_2020_de_2480
1133712607549034496	@gebirgsjager1 Genau das ist meine Meinung. Deutsche Politiker unter der Führung Merkel haben ganz Europa in ein Ch… https://t.co/csS9u9xRvG	HOF	HATE	hasoc_2020_de_2277
1128369592739532801	Ich habe eher den Eindruck "ist der Ruf erst mal ruiniert, lebt's sich völlig ungeniert" ... Wenn ich so an… https://t.co/6xPxMQdTRL	NOT	NONE	hasoc_2020_de_356
1134187704760115200	Nach der Rede von #Merkel könnte man meinen sie sei eine weltoffene Frau, die sich für die Rechte von allen Mensche… https://t.co/JbDdaga0WV	NOT	NONE	hasoc_2020_de_1159
1124414309562499072	RT @a_weitkamp: Warum müssen wir Deutsche im Alleingang die Welt retten? Ich lehne die CO/2-Steuer ab und will mit meinem Diesel Euro 5 dur…	NOT	NONE	hasoc_2020_de_743
1125069849921716224	@veganhure weil man dort music hört um einzuschlafen	NOT	NONE	hasoc_2020_de_192
1128411489654669313	@ufdieBlende 4 GT sind eine adäquate Entschädigung für ein verrammeltes Knie. Findisch.	NOT	NONE	hasoc_2020_de_1074
1128011915098304512	@FredericLebrun Osram LED Wand- und Deckenleuchte, Leuchte für Auße… now meets your monitoring criteria. ✜ https://t.co/RZCBJH4jIm	NOT	NONE	hasoc_2020_de_1326
1124602239518167042	RT @helllud123: @tagesschau @FuenferPasch In Deutschland existiert keine Meinungsfreiheit mehr - wer nicht links ist, wird von Linken als N…	NOT	NONE	hasoc_2020_de_1120
1128293910709723137	RT @phiIosoph: tragen moslems eigentlich atemschutz beim deo/parfüm benutzen weil alkohol drin	NOT	NONE	hasoc_2020_de_295
1130217015908683782	@TheCat_hi Das ist so 240x200 Leinen-Bettwäsche. Wenn ich die bügeln soll, raste ich aus. Mich reicht es schon, die abzuziehen.	NOT	NONE	hasoc_2020_de_17
1130011092359557125	RT @drpeternagel: Ich glaube, es gibt ein elementares Missverständnis bei Herrn Merz. Deutschland muss die Welt nicht retten. Es wäre für d…	NOT	NONE	hasoc_2020_de_287
1133749869749919744	@MckStf @WELTnews Bist du irgendwie dumm oder so?	HOF	OFFN	hasoc_2020_de_2333
1123802327037693953	@Buerzl wie groß ist der ort am arsch der welt? wie groß die "Stadt"? aber bei den bisherigen fakts würde ich mit f… https://t.co/AuMdY7nsQM	HOF	PRFN	hasoc_2020_de_1637
1132705639074009088	RT @ms_fynn: OB DU DUMM BIST, HAB ICH GEFRAGT?!	HOF	OFFN	hasoc_2020_de_2316
1133558139733860353	@Jan69161843 @ntvde @camanpour Dass ich nicht lache. Merkel war bestimmt auch verantwortlich, dass es z.B. Berlusco… https://t.co/wBFuH8ReTO	NOT	NONE	hasoc_2020_de_1617
1124936391367057411	Ich hasse es wenn ich einfach so einschlafe	NOT	NONE	hasoc_2020_de_1815
1133834959624581122	Barkley &gt; Xavi https://t.co/SAncB0kT6F	NOT	NONE	hasoc_2020_de_1430
1125754398066475009	@223bpm ja idk wird schon cool, war am wochenende im druckluft mit einem floor mit scheiß dj, es waren wenig leute… https://t.co/RAePzgNHU5	NOT	NONE	hasoc_2020_de_2180
1132377820628422656	@benedetusmc Mich freuts für Kovac. Nach der Scheisse die Rollex-Kalle und Steuer-Uli abgezogen haben.	NOT	NONE	hasoc_2020_de_331
1134550705019203586	Ich bin ein arsch 🤝	NOT	NONE	hasoc_2020_de_827
1130917099768111104	RT @wokeup777: Salvini: "Es gibt keine extrem Rechte hier, nur Politiker mit gesundem Menschenverstand. Die wahren Extremisten sind Merkel,…	HOF	OFFN	hasoc_2020_de_3461
1125409496241713154	Wir sind heute mit Sack und Pack von Ottensheim nach Schlierbach übersiedelt (privat und beruflich!) ... myTrans ha… https://t.co/JTCqG7qJCP	NOT	NONE	hasoc_2020_de_3162
1128234510980722688	Die Formel 1 kehrt zurück nach Zaandvoort/NL!	NOT	NONE	hasoc_2020_de_1005
1125514655835750400	Ariiiish? Arsch? Blonder hurensohn? Nazi?	HOF	PRFN	hasoc_2020_de_711
1129343388497657856	@spdde haltet doch einfach mal das maul, wirklich ihr scheiss verräter!	HOF	PRFN	hasoc_2020_de_801
1129023203718959105	@coribuhh Mein Islam verbietet Abtreibungen!! Also halt dich dran sonst nix mit Paradies	NOT	NONE	hasoc_2020_de_228
1130739085117710337	RT @roterPaenda: DU DUMME SAU ICH WILL WÜRMER ! DU ZAHLSCHWEIN GIB MONETAS JEDS #zahlschwein #geldherrin https://t.co/PaUWwcNwHT	HOF	OFFN	hasoc_2020_de_2872
1131608379753947138	@MevsimHerk hör das schon von meiner mutter ahhaha 😭😭 glaube wird eh das sein, was anderes kann ich nicht	NOT	NONE	hasoc_2020_de_1930
1126968464537788417	Now Playing: Aquagen - Ihr Seid So Leise! 2011 (Scheisse, Scheisse Leise) (Radio Edit)	HOF	PRFN	hasoc_2020_de_2357
1129085233276624901	@6ponge Bist du dumm	NOT	NONE	hasoc_2020_de_1487
1129146138790105089	slipknot sind zurück	NOT	NONE	hasoc_2020_de_1352
1132700433942814721	oral porno gratis deutsche lesben pornos frei techische frauen porno deutsche milf bondage https://t.co/is78YTPmx5	HOF	PRFN	hasoc_2020_de_1267
1124707424278020099	@Thomas_Bareiss @welt Ein weiterer Politiker, der denkt, er wisse mehr als die Experten. Ich hoffe, Sie fahren nebe… https://t.co/Lx3pB0sHQ1	NOT	NONE	hasoc_2020_de_1126
1131632354404052993	Ist dieses Kleid scheisse. #GNTMFinale	NOT	NONE	hasoc_2020_de_3422
1124787669714649088	FixiFoxy - Macht euch einfach selbst ein Bild von mir und schreibt mich an und dann sehen wir einfach, wo das hin f… https://t.co/VEIp04rNhv	NOT	NONE	hasoc_2020_de_1003
1128169675425234945	@juliepulie3 99% dummes Geschwafel.	NOT	NONE	hasoc_2020_de_2219
1132306190338351109	@AstridDorothea @claudia_kade @welt Abschaum trifft auf abschaum.. lebe seit 2 jahren in Albanien und bekomme mit… https://t.co/Vuc5Uki6Th	NOT	NONE	hasoc_2020_de_1079
1131252438546169856	@heinzschmidt41 wie viele deutsche Politiker	NOT	NONE	hasoc_2020_de_80
1131302157846745089	RT @DFB_Junioren: 🇩🇪 💪 Die deutsche #U21 reist mit 2️⃣7️⃣ Spielern ins Trainingslager nach Südtirol. Hier ist der vorläufige Kader für die…	NOT	NONE	hasoc_2020_de_148
1127116145981571072	@OlafOlafson1 Kriegst du dann Señorita, Bella Donna und die Teletubbies Titelmelodie zurück? #TeamAlessio	NOT	NONE	hasoc_2020_de_2714
1132412570453893122	-&gt; 1,70m -&gt; Ôkami (kA, momentan scheiß egal.) -&gt; Kunst -&gt; keins. -&gt; keine Ahnung. (Japan? was weiß ich.) -&gt; brauch… https://t.co/r34sWkzRt9	NOT	NONE	hasoc_2020_de_3260
1128579068876795904	@Birnendung 👍stimmt, das hört man sofort	NOT	NONE	hasoc_2020_de_178
1126086146549866496	&gt; kid goku ist raus &gt; .... auf der switch &gt; meine reaktion https://t.co/5E2VzSVr8p	NOT	NONE	hasoc_2020_de_3244
1132840666281721856	Haftbefehl Farid bang und wie der ganze gesellschaftliche Abschaum ( Zitat Farid Bang) sich sonst so nennt vergifte… https://t.co/vanAIKzufj	HOF	PRFN	hasoc_2020_de_1515
1127632078919622656	warum werde ich jedes verfickte mal unglücklich, dieses scheiß drecksleben	HOF	PRFN	hasoc_2020_de_1720
1130153455404888064	RT @Zentralrat1: "Zurück in eine Vergangenheit, die es nie gab." Wenn sich Dummheit und ideologische Verblendung mit Sprachinkompetenz paar…	NOT	NONE	hasoc_2020_de_3075
1123811885873287168	KI im Arbeitsleben: Asiaten euphorisch, Deutsche skeptisch https://t.co/HbmuxMv0Sz https://t.co/ohn26S3mBg	NOT	NONE	hasoc_2020_de_3391
1134129353627975680	@Dreilaender Die Linken sind lächerlich.	HOF	HATE	hasoc_2020_de_2080
1134494044162277377	RT @ohnenahme: @MalteKaufmann @Nobby1949Z Ich könnte kotzen über so einen Bullshitt	HOF	PRFN	hasoc_2020_de_1105
1125056482649812994	RT @kimmathei: @Taddl Reiß dich zusammen du dummer Hurensohn 🤬	HOF	OFFN	hasoc_2020_de_3175
1127289639159648256	RT @AkenoAD: einfach zurück nach bo3 https://t.co/JMU61ks2eI	NOT	NONE	hasoc_2020_de_1439
1125458120837406720	Lorde &gt; Billie Eilish. #SorryNotSorry	NOT	NONE	hasoc_2020_de_2816
1130197294266146816	@alpeninitiative Die kapitalistische Warenwelt hat uns den Kopf verdreht https://t.co/wbnF4jLsbn	NOT	NONE	hasoc_2020_de_1598
1133418909816766467	...nicht nur dass sie mit dem Kopf gegen die Wand rennt, sie nimmt jetzt zum dritten mal Anlauf. #akk #rezovideo	HOF	OFFN	hasoc_2020_de_820
1132274674308657152	RT @NicolasTransgay: Es gibt Lesben, die Kinder zeugen können. Es gibt Schwule, die schwanger werden können. Repeat!	NOT	NONE	hasoc_2020_de_2600
1132757694547410946	@_MichaelLehmann @elltra Irre Logik. Die Grünen haben ja heute in Deutschland auch nicht den Rücktritt von Merkel g… https://t.co/tW4PJ3JmrN	NOT	NONE	hasoc_2020_de_3275
1127992193464115202	@GermanLetsPlay Bei mir ist die Download rate mehr als nur im arsch bei Unitymedia 5minuten für vielleicht 20m/bit… https://t.co/nGB5lqlPVW	NOT	NONE	hasoc_2020_de_912
1131111388296962048	@Junge_Freiheit @ErikWuensche Geht schon los! Das Wundermittel unserer Politiker, um alle Probleme der Welt zu löse… https://t.co/dZCMgWEbfs	NOT	NONE	hasoc_2020_de_984
1133127535720587270	@PEitelwein @heuteshow Wie wäre es, wenn Du meine Eier leckst! DU dumme Nazi-Schlampe!	HOF	OFFN	hasoc_2020_de_2182
1129916435294298114	RT @noringerk: deutsche geilen sich an österreichische politik auf als gäbs in ganz deutschland keine nazis	NOT	NONE	hasoc_2020_de_2646
1132660936161026048	RT @4Kolner: #soisset Hat die Kirche damals doch schon den Nazis geholfen, so verwundert mich es nicht, dass es heute erneut passiert. "N…	HOF	HATE	hasoc_2020_de_2942
1130772975093985280	Islam, die jüdische Weltübernahmewaffe für Ihren NWO GOYIM Sklavenstaat. Haha das muss man sich mal vorstellen. Im… https://t.co/SI2SXcOund	NOT	NONE	hasoc_2020_de_1287
1129046326916898817	@NacazaFPS Du hurensohn was spoilerst du	HOF	OFFN	hasoc_2020_de_7
1128983068423929856	Ich kann garnichts mehr essen mich fuckt das so Hardcore ab damn	NOT	NONE	hasoc_2020_de_1754
1134681923782086656	RT @WeeberWolfgang: @michelreimon Widerwärtig, dumm und überflüssig, was dieses Revolverblatt da verbreitet!	HOF	HATE	hasoc_2020_de_2449
1125760442058649601	@chiquitaflanke @Peter_Ahrens @MarcoFuchs74 @sport_thies @guek62 Wenn das Kachelmann hört	NOT	NONE	hasoc_2020_de_3471
1131072792328384512	RT @A_Hildering: 🥁Merkels "Kultur" wird ganz Europa in das Verderben ziehen ‼️🤔 Rot Grüne Infiltration zerstört Demokratie u. Freiheit ‼️…	HOF	HATE	hasoc_2020_de_1783
1132512252282716166	Die dicke Katze findet, es sei an der Zeit, meinen Arsch aus dem Bett zu heben. Hab ja auch lange geschlafen. 🙄 https://t.co/Q5BgGnJMJU	NOT	NONE	hasoc_2020_de_60
1125469302835040256	@neothemarius @niemehrgruen Nicht zu vergessen, einen moderaten ISlam...	NOT	NONE	hasoc_2020_de_1906
1126168099051515905	@unbequem steck mir ikea hotdogs in den arsch	HOF	PRFN	hasoc_2020_de_1270
1123886322182180864	@KatjaRosch Geiler Arsch	HOF	PRFN	hasoc_2020_de_1330
1133827674114265089	RT @PatriziavdLahn: „Es werden immer noch zu viele deutsche Kinder geboren“, so deren Co-Vorsitzende Jana Herrmann zur Nachrichtenagentur f…	NOT	NONE	hasoc_2020_de_529
1128736195884802048	@headlessdrowned Er soll Gönnen jeds &gt;:(	NOT	NONE	hasoc_2020_de_1046
1126809663994060802	RT @fpoefails: Schon dumm, wenn man die Presse nicht wie euer heimliches Vorbild Erdogan einfach wegsperren kann, gell? Decken diese linksl…	NOT	NONE	hasoc_2020_de_643
1128350584145358849	@iheartfrankfurt oh das is echt scheiße, weil ziemlich langwierig. besser dich!	HOF	PRFN	hasoc_2020_de_3380
1125869133248258048	Ugh, Schreibfehler. Aber wenn es im deutschen brillant ist und im englischen brilliant, kann man schon mal durchein… https://t.co/sS7bgWa5WK	NOT	NONE	hasoc_2020_de_1963
1133388916365647872	Gratis racconti sesso arsch versohlen geschichten. Alte frauen finden porno bellissime gratis. https://t.co/EnFGpD2CjV	HOF	PRFN	hasoc_2020_de_1640
1131654416468258817	@pfefferminzboi Ihr 3 einfach Zucker	NOT	NONE	hasoc_2020_de_168
1134520778622406657	Deutsche porno brutal ehe, deutsche amateur milf! Kostenlose deutsche porno seite, anziane sesso gratis. https://t.co/3rc8PbV1Qw	HOF	PRFN	hasoc_2020_de_1588
1127685296265539584	BlenderBottle Whiskware GoStack Snack Pack 3 Pack – Weiß ab 12.99 EUR https://t.co/mnPRlPxjm3	NOT	NONE	hasoc_2020_de_2536
1133108862670770177	Eisern Union!!!!! SCHEIß VfB!!!!! https://t.co/d4Q7uSWBTk	HOF	PRFN	hasoc_2020_de_2606
1134537778174320640	Kein bog mir den Arsch für dich auf zu reißen, ohne das du auch nur einmal das selbe für mich tust!	NOT	NONE	hasoc_2020_de_1994
1127324284102356992	Mein Hirn an Werktagen https://t.co/PnhSPCYfLx	NOT	NONE	hasoc_2020_de_1879
1126811090028048387	RT @angelam21983732: @petra58249513 @PIPO124567 @krippmarie @jouwatch Merkels Ingenieure, jetzt werden die Deutschen auf sie arbeiten müsse…	NOT	NONE	hasoc_2020_de_2102
1133098012006387718	@sadsleepyloser er hat mich jetzt auch noch cute madchen genannt ich möchte kotzen	NOT	NONE	hasoc_2020_de_846
1134607151928893444	RT @unwreq23: @spoookeyy @vinyu23 @Akame_owo @Sentakuu71 Diese dumme abgeranzte Anime tukke	HOF	OFFN	hasoc_2020_de_1029
1124720233716097025	@SPIEGELONLINE Um Trumps Arsch hoch zu hieven, bedarf es nur einiger Knallfrösche. Das versteht er.	NOT	NONE	hasoc_2020_de_1434
1134198521874341888	Gratis porno gewalt, sexo swinger gratis. Reife frauen pornos deutsche noticias porno gratis. https://t.co/poz6bGcOuA	HOF	PRFN	hasoc_2020_de_1208
1128223853254184960	@tagesschau Hausgemacht! Verteidigung ist Menschenrecht!	NOT	NONE	hasoc_2020_de_2851
1131092476192841728	RT @NachDenkSeiten: Dumm, dümmer, Deutschland – wir sanktionieren und die USA lachen sich ins Fäustchen https://t.co/WeJS8bIzNs	NOT	NONE	hasoc_2020_de_40
1131263431833788416	@Robert19594 @rebound541 @pepper46477330 Sollte das nicht Merkel sein?	NOT	NONE	hasoc_2020_de_353
1127326733567438848	@DatDiscordBoy 64 &gt;&gt; Galaxy &gt;&gt;&gt;&gt;&gt;&gt;&gt; Sunshine &gt; Odyssey	NOT	NONE	hasoc_2020_de_3037
1130887609595715590	RT @HomoBehaviorali: @tagesschau Ist das noch öffentlich-rechtliches Fernsehen oder schon Staatsfunk?	NOT	NONE	hasoc_2020_de_799
1128349632063520769	@DrDavidBerger "Merkel,s "Fachkräfte" aber für was??	NOT	NONE	hasoc_2020_de_3124
1133107965089734657	Billie Eilish ist einfach 1 Cutieπ. Wer ist schon Ariana Grande? &gt;:(	NOT	NONE	hasoc_2020_de_3110
1125819095209906176	@ZDFheute Hört sich ja echt toll an! wenn nur die Lebenshaltungskosten nicht noch viel, viel mehr gestiegen wären ...	NOT	NONE	hasoc_2020_de_3014
1130786719803088897	@Karsten71 Das typische Bild eines Linken!!! Lallend mit der Bierflasche in der Hand,aber Hauptsache Antifa und gegen "Nazis"... 😂😂😂	HOF	HATE	hasoc_2020_de_425
1127679629727281154	RT @gregormodos: Holen wir uns unser Land von den #Linken, den #Grünen, der #CDU &amp; der #SPD zurück. Bei #LtwTh19 #AfDwählen. Für #thüringen…	NOT	NONE	hasoc_2020_de_3081
1132722651171086337	@JoRoe14 Es könnte aber auch eine #Grüne in #Görlitz OB werden @FranziskaOL 💪💪💪	NOT	NONE	hasoc_2020_de_455
1133690964957122560	Menschen die einem an der Kasse am Arsch kleben. Dadurch wird’s nicht schneller. Und ich absichtlich langsam 🤓	NOT	NONE	hasoc_2020_de_1284
1128215137494732800	RT @VonSchwer: Merkel-Regierung immer dreister: Hunderte neue Häuser für Asylbewerber &gt; Notunterkünfte für Deutsche ‼️Unzumutbare Zustände…	NOT	NONE	hasoc_2020_de_216
1130060614477459458	@ZDFheute @ZDF der wettbewerb ist die peinlichste form des eskapismus.	NOT	NONE	hasoc_2020_de_3322
1128767917410140160	RT @jan_buehlbecker: #AfD-Politiker Reil sagt, dass Europaparlament sei überflüssig "wie ein Pickel am Arsch". Eine solche Parlamentsverach…	NOT	NONE	hasoc_2020_de_3159
1127482560374878208	Das bemerken sie erst jetzt?? So war es schon 2015 das man alles suspendiert hat was nicht SED konform war Merkel… https://t.co/shlabkZC22	NOT	NONE	hasoc_2020_de_1838
1133766399510360065	RT @slimemock: Ein Kollege hat mir in die Eier aus spass getreten Ich hau ihn aus spass jetzt ne Bierflasche gegen Kopf du hurensohn	HOF	OFFN	hasoc_2020_de_2974
1125246920849526784	@x_euli Hört sich nach einen perfektes date für mich an	NOT	NONE	hasoc_2020_de_1582
1131256871912923136	RT @KramerGartenbau: Eine kleine grüne Wand um die Natur zurück zu bringen #livingwall #aufdassdiestädtegrünerwerden https://t.co/1piU7fnHjx	NOT	NONE	hasoc_2020_de_402
1125171507255234561	@JochenFlasbarth Und pro Kopf ist bei uns in Deutschland und Europa viel (!) mehr einzusparen! Aber es ist immer l… https://t.co/YsZxTDkcAw	NOT	NONE	hasoc_2020_de_924
1130839693875195905	nackte frauen baden kostenlose deutsche eheluder pornos fette frauen lecken clip xxx gratis https://t.co/bFQG5u8QuW	HOF	PRFN	hasoc_2020_de_1737
1128871281850560512	canal porno gratis geiler nackter arsch sexy video gratis https://t.co/BsmXPml89s	HOF	PRFN	hasoc_2020_de_1501
1128756626335436800	RT @Enfrogge: Jetzt mal unter uns. Der Scheiss hier, der macht doch nicht süchtig, oder?	NOT	NONE	hasoc_2020_de_1178
1124636444096696321	Echt schade, wie offensiv das hier gerade abläuft. Das stimmt nicht. Ich bin als Kandidatin in der derzeitigen Ausg… https://t.co/t6h2OYPJ6v	NOT	NONE	hasoc_2020_de_3421
1132948988368498688	RT @tagesschau: Interaktiv: So wanderten deutsche Wähler bei der EU-Wahl https://t.co/AZmmxmDuvl #Europawahl2019 #EUElections2019 #Wählerwa…	NOT	NONE	hasoc_2020_de_861
1129381820896894976	https://t.co/pj8uWgnBX7 #KlöberMeraXL #BürostuhlGroßePersonen #BürostühlMeraXL Bürostuhl gesundes Sitzen MER78 XS… https://t.co/qXRRAjuUhC	NOT	NONE	hasoc_2020_de_2767
1133368645260914688	@JuliusIVX Die Deutschen mögen Die Grünen nicht also ab in ein Land das noch rechter ist	NOT	NONE	hasoc_2020_de_159
1133454666254172160	@FrauProper Wie lange kennst du die Darlings schon?	NOT	NONE	hasoc_2020_de_879
1129846440749076481	@sebastiankurz Halt doch einfach mal die Fresse Boomer	HOF	OFFN	hasoc_2020_de_82
1125440823494172673	Halt einfach die Fresse Dominic Herzberg	HOF	OFFN	hasoc_2020_de_1312
1129737544009166849	RT @JChristandl: Einfach eine Bagasch https://t.co/68ncf18a2k	NOT	NONE	hasoc_2020_de_554
1131147014715203584	@welt Merkel Deutschland eben......die Frau auch doch total versagt	NOT	NONE	hasoc_2020_de_2107
1127951026387148800	Dinge die ich nach meinem Studium nie wieder machen werde: Schaltpläne in LaTeX zeichnen. Was ein Scheiß.	NOT	NONE	hasoc_2020_de_2499
1131414359660519424	@frittenmelly Ich sag nur, was erwartet man von einem Bildartikel?? Einfach ekelhaft!	NOT	NONE	hasoc_2020_de_197
1127626613720584193	Honestly das ist so dumm. James ist scheisse aber die Palette ist gut. Ich nehm auch welche wenn einer seine loswer… https://t.co/ZisXmORuRm	NOT	NONE	hasoc_2020_de_2329
1133770958727241730	French Open: Deutsche Außenseiter chancenlos gegen die Tennis-Stars Federer und Nadal... https://t.co/dVcbDfbzIC	NOT	NONE	hasoc_2020_de_3199
1124644312589983744	Wenn man unterwegs ist, kommt es einem vor als gäbe es nur noch Idioten.	HOF	HATE	hasoc_2020_de_2483
1131798155266281472	@parents4future @wozukunft Dumme Idioten sind immer bei bei Dummen Ansichten dabei !	HOF	PRFN	hasoc_2020_de_1812
1127835632678707200	RT @BreezyPayback: Wenn du stattwie ein Mann wie ein Hurensohn dasitzt https://t.co/cvJuIBFTNO	HOF	PRFN	hasoc_2020_de_1909
1133700544739069952	RT @romannervnicht: "gib arsch kleine kah" war wohl doch die falsche herangehensweise https://t.co/dIf8dIPt9q	HOF	PRFN	hasoc_2020_de_2594
1124586796111880193	RT @dr_veterinaer: wir warten doch alle nur auf den menschen, der dir nach dem duschen das handtuch reicht. und dann zurück zieht und grin…	NOT	NONE	hasoc_2020_de_2290
1131975779825463307	@LeopoldStammler @guenschl @APrestros @Hoebi75 @HeleneSteiner4 Dass sich Kurz als Befehlsempfänger von Merkel und N… https://t.co/XugLcyb3nD	NOT	NONE	hasoc_2020_de_2506
1133061047617761280	@MimmisMama Und den pack wieder zurück in Karton! ☝🏼	NOT	NONE	hasoc_2020_de_2602
1128007397824270336	@RAStadler @sixtus @christophnebgen Man könnte ja auch einfach die Grünen wählen 😉	NOT	NONE	hasoc_2020_de_3180
1130037361272864768	@Merkel hat ein suuuper Rhythmusgefühl 😄😄😄	NOT	NONE	hasoc_2020_de_413
1126352086382325760	Gabriel gegen Sparkurs: Abgaben und Unternehmensteuern senken https://t.co/f7hSyvVWLJ	NOT	NONE	hasoc_2020_de_587
1129444685133619203	@hilfebinhure doch halts maul	HOF	PRFN	hasoc_2020_de_108
1124567267415613441	@darthtoastbrot Ekelhaft! Brauner Abschaum!	HOF	HATE	hasoc_2020_de_1360
1125616250296598528	Willkommen zurück, 254-122-madia-up!	NOT	NONE	hasoc_2020_de_2529
1132376415536668675	RT @verusoss1: So war es bei den Nazis auch. https://t.co/zKt4lcHPcc	NOT	NONE	hasoc_2020_de_2128
1132914435692027904	@RasmusAndresen Noch mehr Migranten auf dem Weg das deutsche Volk zu zerstören....	HOF	HATE	hasoc_2020_de_1738
1133326123423731712	@AchimSpiegel Niemand vergißt was. Es gibt vermutlich kein anderes Volk der Welt, das die Verbrechen seiner Vorfahr… https://t.co/t0eAwrayJm	NOT	NONE	hasoc_2020_de_1345
1123507836561121281	Abbaurecht hört enneaeterisch	NOT	NONE	hasoc_2020_de_3035
1130804604311154689	Kamnonym frontet hier Kanak Frauen weil er stabilen Rücken* hat *seine Nazi Eltern Sponsorn ihm keller	HOF	OFFN	hasoc_2020_de_2857
1124258075928612864	@kleinerdonner_m Einfach dumme Menschen,lass dich nicht ärgern💙	NOT	NONE	hasoc_2020_de_1890
1127502533629497345	RT @helarctos: Wo sind die Frauen? Sitzen die den Herren gegenueber? Oder am Katzentisch? Oder in der Kueche? Wo sind die Frauen? https://t…	NOT	NONE	hasoc_2020_de_3152
1134213889799929858	RT @obvsthiam: @IMMORTALSCUMBRO DEINER IST HALT ECHT WOWYYYY	NOT	NONE	hasoc_2020_de_2113
1133422160402362368	@Aqosteee @cClearz Dikka ratter doch einfach weg von mir aus verballer halt die 30 kugeln kuda aber hör doch net au… https://t.co/a9yuHci346	NOT	NONE	hasoc_2020_de_655
1125325060707946496	@c_lindner @Welle_Haidball @SawsanChebli Halt die Fresse	HOF	OFFN	hasoc_2020_de_5
1128892316259934208	Charaktere: Nowottny: Merkel kann ein warmes Kölsch gefrieren lassen https://t.co/vkvo6PbNUB https://t.co/Rch7hJqXHi	NOT	NONE	hasoc_2020_de_1998
1124580332672434177	@dwarfplanet Immer der, der dumm fragt.	NOT	NONE	hasoc_2020_de_789
1133104978724155396	Wahlsieg der Grünen in Tübingen: Grüner geht’s kaum https://t.co/UzNqO8RJRt https://t.co/jB4fvLkpM5	NOT	NONE	hasoc_2020_de_1394
1125095837800050690	@WandaZietz halt doch einfach deine dumme Fresse. https://t.co/XsNm7Z18AH	HOF	OFFN	hasoc_2020_de_579
1129040538802511873	Ich werde es nicht wegschmeissen das ist das einzigste noch was mir von meinem geliebten Baka Idioten Exfreund übri… https://t.co/QgCtly0ZNj	NOT	NONE	hasoc_2020_de_2428
1128897764669181952	@Karl_Lauterbach Falsch, die Nationalsozialisten waren Idealisten. Unter Hitler sind viele SPDler zu den Nazis über… https://t.co/3QpBrFakuU	NOT	NONE	hasoc_2020_de_3116
1131402762414166017	RT @stein_schreibt: Hitler, #Chemnitz, die Identitären, die @DBurschenschaft, Kalbitz, #Höcke, Gauland, @alex_malenki, @Martin_Sellner, die…	NOT	NONE	hasoc_2020_de_1888
1124638566414467072	@SenaJulya @PassiValerio @christianxxx1 @dos_meninos @transexclub geiler Arsch, spritzt du auch schön, wenn man die… https://t.co/3HAopBujGG	HOF	PRFN	hasoc_2020_de_2712
1130262016583712768	hört mal auf hässliche leute zu retweeten ihr bastarde was soll der scheiß	HOF	PRFN	hasoc_2020_de_2074
1133272637667532800	RT @HelgeBruhn: @ollilein69 @FlixBus_DE Hier sitzen insgesamt 5 Leute im bus, hier bei mir ar keiner 😘 Aber selbst wenn, viel mehr Beinfrei…	NOT	NONE	hasoc_2020_de_1464
1127661749438689282	@dd_rico Hihi, der wusste einfach net, was seine Frau wollte: "Aperol. Ist das Alkohol?" "Ja. Soll's ein Aperol-Spr… https://t.co/D5t2mtp64O	NOT	NONE	hasoc_2020_de_1219
1130941980358467584	RT @deutsch365: 🇮🇹🇮🇹🇮🇹‼️ @MatteoSalviniMI: "Wer hat Europa betrogen? Die Merkels, die Macrons und die Junckers! Sie haben dieses Europa im…	HOF	HATE	hasoc_2020_de_628
1130725160028393474	@grit_lady Wie wäre es mit nem Job? Da kriegste Geld und nicht jeder muss deine Fresse sehen	HOF	PRFN	hasoc_2020_de_383
1130200305780576259	RT @_Itookmyprozac: Jetzt kuck ich seit 3 Minuten #AnneWill und könnte wegen #meuthen schon meinen Kopf gegen die Wand schlagen	NOT	NONE	hasoc_2020_de_1022
1128272419112853504	RT @pinkcrazypony: Der Reporter redet von der Berliner Kriminalitätsstatistik und der junge Mann redet vom Islam. Besser könnte man einen…	NOT	NONE	hasoc_2020_de_1632
1128639194216136704	@iaminhellandyou @MlCHELANGELHOE @currygewuerz @iamomarscurr @iulieeer Halt die Fresse	HOF	PRFN	hasoc_2020_de_1094
1126958108788629506	RT @valuwunr2: alben sind einfach so viel cooler als diese permanenten single releases die ganze zeit :(	NOT	NONE	hasoc_2020_de_1854
1133090617427468288	@VfB @nicoivang19 Scheiß DFB	HOF	PRFN	hasoc_2020_de_3237
1134405611452542977	@tagesschau Schon wieder ein Uber-Artikel? Völlig uninteressant zu erfahren, wo die grün verblendeten Journalisten… https://t.co/iKsPPpKmjP	NOT	NONE	hasoc_2020_de_2094
1125640384305139713	@tagesschau Während uns die Politiker über die Medien anlügen?🙄	NOT	NONE	hasoc_2020_de_2806
1127848442087317504	Es ist sooooo verdammt kalllllttttt hier. Ich friere mir alles ab. #dialyse	NOT	NONE	hasoc_2020_de_2823
1124245262338265088	RT @Dealo_RU: Animus: Rooz du verstehst das nicht. Es war nicht mit dem Islam vereinbar zurückzuschlagen. https://t.co/PY0x7gy9Uf	NOT	NONE	hasoc_2020_de_974
1132194366003531781	@welt Wieso schauen die meisten „Influenzer“ alle aus wie irgend ein Clown??? ninja hat angerufen, er will seine blaue Perücke zurück	NOT	NONE	hasoc_2020_de_196
1124361188677124104	Warum gibt es so Menschen die ein Hoodie tragen aber die Ärmel hochkrempeln??? Du bastard zieh doch einfach ein T-Shirt an	HOF	PRFN	hasoc_2020_de_442
1125838867150536704	RT @MalteKaufmann: Es ist einfach so unglaublich, wie die Medien einer grünen Regierung entgegengeifern und den "Kanzler #Habeck" herbeisch…	NOT	NONE	hasoc_2020_de_2317
1134052031608606720	RT @wokeup777: “Der Islam ist eine Sekte, die im Widerspruch zur angolanischen Kultur steht.“ Ich möchte hinzufügen, nicht nur zur angolani…	HOF	HATE	hasoc_2020_de_2950
1125864494356365313	@Ballou381 @SawsanChebli Was heißt sauer, mich kotzen solch dumme Menschen einfach an die auch noch von meinen steu… https://t.co/S2aHJl7hUO	HOF	HATE	hasoc_2020_de_2566
1126258817631698944	@EASPORTSFIFA @EA_Germany was soll das ? Will mein pack https://t.co/1RFIEd4Ghw	NOT	NONE	hasoc_2020_de_763
1126842434082824192	RT @GeraldGrosz: Frau Merkel, Frau Barley! In Wahrheit vollziehen Sie mit Ihrem polygamistischen Einbürgerungsgesetz nun auch rechtlich jen…	NOT	NONE	hasoc_2020_de_3246
1132900372203397122	@dieliebeanna Willkommen zurück!	NOT	NONE	hasoc_2020_de_2877
1129328330937909248	RT @echtnichtstevo: mein gehirn immer wenn ich mit @2theskyy rede https://t.co/RK2IFqeVus	NOT	NONE	hasoc_2020_de_3469
1134163377801125889	#NWBRS1 +++ Ausfall +++ Verden (Aller) (ab 07:33) -&gt; Bremen-Vegesack (an 08:25) am 31.05.2019 Grund: Betrieblich… https://t.co/9YkjYOxZnC	NOT	NONE	hasoc_2020_de_1030
1134302171531362304	@kingabrieu Gabriel Gabriel kkkkkkkkkkkm	NOT	NONE	hasoc_2020_de_64
1132199663401132034	@tagesschau ÖR-Framing - Explosion. Ausländische Medien berichten wahrheitsgemäß, wie auch Macron, von einem Anschl… https://t.co/rZ3yIPrqeP	NOT	NONE	hasoc_2020_de_603
1133434198054907905	ich will einfach verschwinden wie falco	NOT	NONE	hasoc_2020_de_2710
1127008176199454725	Richie Kotzen https://t.co/sjcxkPJz1H	NOT	NONE	hasoc_2020_de_262
1129319967504117763	RT @turi2: Ein Handwerks-Verleger mit zwei linken Händen, das gibt's: "Ich kann nicht mal einen Nagel in die Wand schlagen", sagt Alexander…	NOT	NONE	hasoc_2020_de_475
1134534045214355456	RT @FJ_Murau: Liebe Virginia Woolf, Ich war immer ein Romantiker. Rotwein, Chansons, Tanz der Geschlechter bei Sonnenuntergang. Früher sch…	NOT	NONE	hasoc_2020_de_2023
1131818652800622592	@neospiesser @ZDFheute Sagen diese Idioten über die anderen Idioten die nicht hingehen ebenso.	NOT	NONE	hasoc_2020_de_1870
1134017403426394114	RT @ab19868: Muslimische Welt empört Angola verbietet den Islam https://t.co/Q1UcQcrL8w	NOT	NONE	hasoc_2020_de_2659
1126069167994568706	RT @intramorus: Und jetzt alle nochmal von vorne: Nazis sind nicht dumm, sondern menschenverachtend. Nazis sind nicht dumm, sondern böse.…	NOT	NONE	hasoc_2020_de_1849
1133553282750865414	RT @avukatramo: SJetzt zu meinem Hauptjob in der Politik. Deutsche Doppelmoral und deutsche Hetze gegen Muslime, vor allem gegen das Kopftu…	NOT	NONE	hasoc_2020_de_959
1134441812490428416	@RegSprecher @Harvard Glückwunsch Frau #Merkel. Und willkommen in den heiligen Hallen der Ehrendoktorwürde.#Harvard… https://t.co/9mxY2A3M4R	NOT	NONE	hasoc_2020_de_1579
1131281295366131712	@dieserbutzi Ich Neonlicht einfach Christine und alles ist palleti	NOT	NONE	hasoc_2020_de_454
1124754148845662212	Mein Weg zurück ins Leben: Die Eier des Hühnchens und der Speck des Schweinch... https://t.co/nbJPGls6xP	NOT	NONE	hasoc_2020_de_962
1132582699808546818	Hey ... schalten wir doch einfach das ganze Internet ab 🙄	NOT	NONE	hasoc_2020_de_2612
1130247885973544962	@tim0cy @FlashSkyNews @STARGAMESTV69 @ex1lity alter ihr idioten müsst echt mal zu lernen wie man leute untagt	NOT	NONE	hasoc_2020_de_825
1132348259186429955	RT @DrDavidBerger: Die Politiker der Altparteien liefern die Vorlage für die Aktionen der Rotfaschisten https://t.co/LtVl6yxzgg #EUWahl2019…	NOT	NONE	hasoc_2020_de_2939
1127150472144531456	RT @VlkrDhr: Leute, wir sind echt am Arsch. https://t.co/ENxhw54KXQ	HOF	PRFN	hasoc_2020_de_1350
1128021687809736706	Ich will das einfach nicht https://t.co/vnyU3gMBBz	NOT	NONE	hasoc_2020_de_948
1128228601210523648	KHS RE.DB Herrenuhr Reaper mit Taucherband Schwarz ab 169.00 https://t.co/0zqhShNP1G	NOT	NONE	hasoc_2020_de_2593
1126198927181647872	@hanbunkurai Ich hab da schon so viel Zeit und Geld investiert das ist echt unnormal, vor allem jetzt seit ca. 2 Ja… https://t.co/ABghZviTXD	NOT	NONE	hasoc_2020_de_318
1123765937268756485	Sandy4Love: erst blas ich ihm seinen fetten Prügel und dann darf er seine prallen Eier auf meinem geilen SATINARSCH… https://t.co/DlCWWqTyyT	HOF	PRFN	hasoc_2020_de_2825
1132656972543778816	Deutsche hausmeister pornos, sex kostenlos anschauen! Frauen mastubieren videos, deutsche fernsehfrauen porno. https://t.co/uktz6lD7iD	HOF	PRFN	hasoc_2020_de_2913
1131072683284860929	Campingtisch hört endozentrisch	NOT	NONE	hasoc_2020_de_375
1132040724432732160	YOS, erst macht Sonic (immernoch9 die ganze Zeit geilen scheiß und jetzt noch das!	NOT	NONE	hasoc_2020_de_1231
1127994202552504320	RT @MRSL0NELYY: kann mich jemand motivieren zu lernen bin am arsch	NOT	NONE	hasoc_2020_de_2677
1130014028368158720	@Time1608 @AlphaSoulmaster @Livault_SMT @Ma2Ju @AnniTheDuck aber wenn der Fötus noch nicht mal ein Gehirn hat und n… https://t.co/HRHdKAcltH	NOT	NONE	hasoc_2020_de_2618
1128231314950373376	RT @lawyerberlin: Auch #Merkel, #Maas und #Habeck können nicht verhindern, dass man sich an der Frühlingssonne erfreut. „Die Kunst glücklic…	NOT	NONE	hasoc_2020_de_1281
1131588360345014274	Grüne messen Feinstaub https://t.co/HNbugnTQmg	NOT	NONE	hasoc_2020_de_1118
1134176560494403586	Verlassene Ferraris in Texas: Ferrari-Friedhof im Grünen https://t.co/XUy5on6nCD	NOT	NONE	hasoc_2020_de_3488
1126966300272676867	@MontanaBlack Du bist der deutsche PewDiePie LUL	NOT	NONE	hasoc_2020_de_702
1124120632776589313	@HeikoMaas " Netzwerke " - was für ein dummes Wort ... Meint Icke	NOT	NONE	hasoc_2020_de_3420
1124116069369688064	@nrwzum0 hör mal zu #manuvoice ich pack dich jetzt in die gruppe und wir schieben lachkicks	NOT	NONE	hasoc_2020_de_502
1123824166778568705	@BeniOurigal @Musclebear66 @tagesschau Na! die Flüchtlinge (Migranten) bekommen bestimmt kein Geld davon ab! Denk mal nach!	NOT	NONE	hasoc_2020_de_463
1127135792093175809	Keine Prüfungen am Frauenstreik?! Nur für Frauen oder was?! Das sind neue Dimensionen und Methoden von unseren staa… https://t.co/a4RXUJexYT	NOT	NONE	hasoc_2020_de_848
1134231598168182784	RT @hangen_claude: Angola verbietet den Islam https://t.co/iKxcx6UARZ	NOT	NONE	hasoc_2020_de_773
1134549056649347072	🖤❤️#WunDerBlokK Hate,Hetze Der Internetausdrucker, #Rechtskonservativ,eher ,,rechtsradikal” Zurück zum Printformat:… https://t.co/dInDtuyeRt	NOT	NONE	hasoc_2020_de_2310
1133646211737628672	Wäre voll cool wenn man einfach sein Gehirn gegen ein gutes tauschen könnte https://t.co/sg4dtDhW7M	NOT	NONE	hasoc_2020_de_1725
1123540355025129472	@aurelmertz Deutsche Ja Rule. https://t.co/A6dHAaGPt0	NOT	NONE	hasoc_2020_de_1594
1133878756542681089	@Veli0801 @VaderYu91 @Gaming20003 Maul und Hilf mir*	HOF	PRFN	hasoc_2020_de_3300
1129820717086851072	@SAUVAGECRIM ich hoffe 4 kanaken ficken ihr in den arsch	HOF	PRFN	hasoc_2020_de_2750
1125829887154110465	RT @Batu_0699: Nazi in Arsch gef https://t.co/0yu6SYTzNe	HOF	PRFN	hasoc_2020_de_1743
1125786132153806848	Ende der Pressefreiheit: Journalisten in der Türkei sind Erdogan so ausgeliefert wie nie zuvor https://t.co/TKZvvIgeCs @welt aracılığıyla	NOT	NONE	hasoc_2020_de_2211
1133432180582039555	RT @Sir_Schnee: #Merkel schafft die AKW's und die Kohlekraftwerke ab, pflaster das Land mit Windrädern zu, öffnet alle Grenzen lobt #Greta…	NOT	NONE	hasoc_2020_de_648
1123842856597295107	@fierce_friday @wolf_saar Islam Apologet. Auch noch als "minderwertige" Frau. Fang an zu denken!	NOT	NONE	hasoc_2020_de_2648
1127503594801049600	RT @KrAd75: wieder mal festgestellt das frauen auf metal konzerten sehr attraktiv sind. ausser bei sabaton, da sind die hässlichen.	HOF	PRFN	hasoc_2020_de_1098
1132918307047333888	RT @HHawkeye24: Europaweit #Grüne 7-8% Deutschland: Grüne 22% Kann es sein, dass die anderen (wieder einmal) schlauer sind?	NOT	NONE	hasoc_2020_de_2886
1130126251144962048	RT @inearlierdays: Das einzige Deutsche an einem "Deutsch-türkischen Kulturverein" ist der Schriftzug "Deutsch-türkischer Kulturverein".	NOT	NONE	hasoc_2020_de_791
1124926857705607168	@BR24 Es ist das Eingeständnis des Staatsversagens, wenn Politiker einen Mildtätigkeitswettbewerb ausrufen. Ich sch… https://t.co/PqSoDxfCtU	NOT	NONE	hasoc_2020_de_3464
1126747030460612611	#Wisag Transporter in Lichtenberg entsorgt https://t.co/fTQ3djheGC	NOT	NONE	hasoc_2020_de_211
1132931393292513282	Partei-Mobbing? Deutsche Öffentlich-Rechtlichen färben FPÖ braun https://t.co/JowH5HwzHb via @China_Welt_News	NOT	NONE	hasoc_2020_de_2269
1125265325459685376	@Tamaarriiss Ich töte deinen scheiß hund du fette hure	HOF	PRFN	hasoc_2020_de_3183
1132701453125079040	RT @Juergen_Fritz: Der Bruch mit der Zivilisation durch die Linken. #Zivilisationsbruch #RonaldSullivan #Harvard #linkerMob https://t.co/Fi…	NOT	NONE	hasoc_2020_de_567
1132608972949794816	RT @Scyltara: Erst wenn die letzte Kirche verwüstet, die letzte Frau ein Kopftuch trägt und die letzten Ungläubigen vernichtet Erst wenn d…	HOF	HATE	hasoc_2020_de_2348
1133395551737798659	@SteinbachErika @BeaArep Korrupten Parteien, die für LOBBYISTEN lügen, Leute für dumm verkaufen und unterschreiben,… https://t.co/0MrJHBXNwq	NOT	NONE	hasoc_2020_de_781
1127287214847811584	RT @DfaCheck: Wenn man nur noch am Scheiße labern ist! #fckafd #erikasdreck #NiemalsAfD https://t.co/KrkszIMuzo	HOF	PRFN	hasoc_2020_de_2152
1134083157526011906	So einfach..... echt jetzt, fängt auch er an den Grünen d Teppich auszubreiten?	NOT	NONE	hasoc_2020_de_3030
1127966859872165889	Das Schwierigste wird sein, all die Nazis wieder aus ihren Posten zu entfernen.	NOT	NONE	hasoc_2020_de_3448
1133732895418388480	Mal schauen, ob @DB_Bahn immer noch so scheiße performt. 🤷‍♂️	HOF	PRFN	hasoc_2020_de_368
1124341475481931776	03.05.2019|btc-echo: Krypto-Tauwetter? Bitcoin-Börse Bakkt deckt sich mit Krypto-Assets ein -&gt;… https://t.co/vHeRav3S0y	NOT	NONE	hasoc_2020_de_288
1126796082833440774	joke - bin doch kein woker Hurensohn. Mein Bruder hat das geschrieben	HOF	PRFN	hasoc_2020_de_1356
1123479910901743616	RT @DanielaKluckert: Die Begegnungszonen in #Berlin sind gescheitert. Nur die #Grünen und #Linken haben das noch nicht begriffen. Da wird #…	NOT	NONE	hasoc_2020_de_1323
1124314535463137285	@Gruene_Bayern Ja, das wussten schon die Nazis: Masse macht's. 😉	NOT	NONE	hasoc_2020_de_2587
1125313224411353089	Berufsbezeichnung bei #rp19-Speaker(n): Trendexperte. Ist man eigentlich vor dem Trend schon da? Hieße es dann nic… https://t.co/JFaPfxcAds	NOT	NONE	hasoc_2020_de_3315
1124162441577947136	@weird_booknerd Ich möchte kotzen und weinen auf einmal.	NOT	NONE	hasoc_2020_de_1252
1124383192004403205	RT @LustigRalf: @Johannahh2 Als wir mit 28 das Haus in absoluter Alleinlage kauften sagten Freunde: Buh, voll am Arsch der Welt, wie langwe…	NOT	NONE	hasoc_2020_de_3428
1132738069407391744	So. Kein Ablenken, kein drumrum. Und kein dumm machen lassen mehr. Nicht von denen.	NOT	NONE	hasoc_2020_de_1680
1132005144168734721	RT @GJSH: So sehen glückliche Grüne aus!!! Mit @aminajxx , @denise_loop und @Malte__Krueger #ltwsh https://t.co/lLxX0JrkEs	NOT	NONE	hasoc_2020_de_2652
1126085827757531137	dfdi einfach ein szenecode ich sag halt wies ist #dfdi	NOT	NONE	hasoc_2020_de_26
1124303265372438528	@senfmaedchen Glaube eher nicht und genau das hält mich auch ab aber Linke ist halt auch meh, wenn Mensch sich das… https://t.co/1B09cvz6tl	NOT	NONE	hasoc_2020_de_3114
1124420479392145409	@Hallaschka_HH Die Trottel raffen nicht mal das der Verfassungsschutz schon in deren Smartphones sitzt und jede Zei… https://t.co/aldplfUGlF	NOT	NONE	hasoc_2020_de_1372
1129837557225840640	@Traderbulls @welt Korsett für den Kopf.	NOT	NONE	hasoc_2020_de_2406
1125414722357088257	RT @fragdenstaat: UPDATE #Zensurheberrecht: Das BfR schickt ab sofort Zugangscodes zum Glyphosat-Gutachten allen 40.000 Antragstellern zu.…	NOT	NONE	hasoc_2020_de_705
1128670349527277570	RT @73Rieck: Warum die Europäer Vasallen der USA sind und wie von dieser Tatsache abgelenkt wird https://t.co/j2sZl0eeGJ	NOT	NONE	hasoc_2020_de_166
1133339356440272899	RT @Torben12045934: Der deutsche #Staatsfunk #ARD #ZDF ist in seiner linksgrünen Ausprägung zu 100% kampagnengesteuert, undemokratisch und…	NOT	NONE	hasoc_2020_de_2927
1124680824023076864	Der Kopf will schlafen 😴🛏️🌙 aber der arsch 🍑.. will kacken 😔🙏🏻💩	HOF	PRFN	hasoc_2020_de_1818
1131817088341938176	RT @freehippiegirl: Bekomme immer noch nen leichten Kotzreiz, wenn der Typ, der mich schwanger hat sitzen lassen und danach noch verspottet…	NOT	NONE	hasoc_2020_de_2996
1123940634233012225	@PalastLuger Hasserfüllte und pelzige Ergergrüße zurück an die Suskadse. https://t.co/hgPkKrorJU	NOT	NONE	hasoc_2020_de_2318
1126873534830206976	@hapelanger @ZDFheute Atemlos durch deutsche Land	NOT	NONE	hasoc_2020_de_3447
1130028016350978050	😍🔥💋💶WAU🔥MOJE SEXY HOTTT DUPE.🌺🌺💋💋😍😍👍👍 💙💛💙💛💙💛💙💛/🔊🔊🔊🔊🔊🔊🔊🔊🔊🔊🔊🔊🔊🔊🔊🔊🔊🔊🔊🔊🔊🔊🔊🔊🔊DANKEE.😛 D.H.NUR MEIN SEXY GEILER ARSCH GEF… https://t.co/DvEiPZpEED	HOF	PRFN	hasoc_2020_de_1415
1134187595703967744	wie dumm kann man sein eig.	NOT	NONE	hasoc_2020_de_1000
1131151360014082049	nackte frauen hbsch relazione sesso gratis deutsche pornos mutter vidio pono gratis https://t.co/X4wmWnXhJJ	HOF	PRFN	hasoc_2020_de_745
1133589571848015877	RT @reitschuster: Eine Kollegin aus Warschau zur #EUWahl19: «Ich habe viele deutsche Medien abgeschaut, die machen den Eindruck, die Grüne…	NOT	NONE	hasoc_2020_de_2567
1132871016273895424	Montage kotzen mich an	NOT	NONE	hasoc_2020_de_1362
1131848705022332928	@MRLN63 @hxnaz Sarma mit weinblätter gibt es ja nicht nur bei türken aber ahah aber ja same sksks	NOT	NONE	hasoc_2020_de_780
1131500644869771265	Am Rande: Merkel hatte schon ne Menge Momente.	NOT	NONE	hasoc_2020_de_614
1127888891955044352	@Natasnoctem Bist halt zu scheisse um in Englisch ein Jerk zu sein! Step up your game!	HOF	OFFN	hasoc_2020_de_2358
1134698457745092608	@focusonline Ich fordere Wiedereinführung der Todesstrafe für Politiker! Ich kann dies berliner rot rot grün nicht… https://t.co/AEUi4H3EZj	HOF	HATE	hasoc_2020_de_3476
1132153828038651904	@faho74 Ich halte ihn nicht für einen Hochstapler, eher ein narzisstisches Arschloch.	NOT	NONE	hasoc_2020_de_2453
1132659879196397569	Ebay Kleinanzeigen is der geizigste idioten gefüllteste Ort auf dieser Erde	HOF	HATE	hasoc_2020_de_2295
1134364314331209728	@zeitonline Probeabstimmungen, das ist so dumm, dass es fast schon wieder wahr sein könnte 😂😂	NOT	NONE	hasoc_2020_de_3242
1128157314832392192	RT @derStandardat: "Flygskam" - Klimaproteste halten Österreichs Politiker nicht von Inlandsflügen ab: https://t.co/akrh6OyeUZ	NOT	NONE	hasoc_2020_de_2863
1133104609638137857	@HenningMayOne wieso machen die leute so n scheiss man? https://t.co/bGiRT93SSB	HOF	PRFN	hasoc_2020_de_1761
1127575858472996864	AHH DU HURENSOHN DA IST EINE BIENE	HOF	PRFN	hasoc_2020_de_794
1133024083216670721	Cambridge-Wissenschaftler: „Frau Merkels Doktorarbeit ist Bullshit“ - https://t.co/2tGbhNRPyY	HOF	PRFN	hasoc_2020_de_694
1132229237413486592	RT @nicolangecdu: Merkel gibt für Weber alles #26MaiCDU https://t.co/QmZlS4Slgs	NOT	NONE	hasoc_2020_de_2844
1126141834319757312	Hört das mit den #freubier auch wieder auf? #rp19 @BWjetzt	NOT	NONE	hasoc_2020_de_3034
1131925376899440640	Strickanleitung Sunshine Cardigan von Melanie Mielinger https://t.co/eyim2H6zF6 #Anleitung #Anleitungen #Einfach… https://t.co/7bLZUenofb	NOT	NONE	hasoc_2020_de_2955
1129650969401274368	Strickanleitung Friendship von Melanie Mielinger https://t.co/pEn3CJYGMD #Anleitung #Anleitungen #Einfach… https://t.co/4KLT9RCd2C	NOT	NONE	hasoc_2020_de_2059
1128202894342279168	Hab heute @marwosdeath in Schule gesehen der hat einfach ein Loch in Hose aber nicht so am Knie oder so einfach am arsch sagt aber keinem	HOF	PRFN	hasoc_2020_de_1413
1127833824950411264	Linke für Hallenbadbau in Kamenz | https://t.co/t1UN5mpVvN https://t.co/nur1IlsJ5V	NOT	NONE	hasoc_2020_de_193
1125453402241105921	RT @MetalGod1975: Linke Schlägertruppen! Da kommen Erinnerungen an dunkle Zeiten zurück die niemand mehr haben will. Aber wir haben ja ei…	NOT	NONE	hasoc_2020_de_1127
1132659099043336192	@derPlietscher @AfD Kein Quatsch oder willst du Wicht auch noch dem Erdokan noch mehr Geld hinten rein schieben? Erst denken dann labern	HOF	OFFN	hasoc_2020_de_2016
1132399601674313728	@Die_Gruenen Dummes Geschwafel	NOT	NONE	hasoc_2020_de_1653
1125701050705563649	@CDU Könnt Ihr es nicht mal lassen die Bürger für dumm zu verkaufen! Wer euch noch wählt oder ein Wort glaubt, dem… https://t.co/OptKkUfMnu	HOF	HATE	hasoc_2020_de_3027
1133710032242188288	RT @aniesmann: Martin #Schulz kandidiert NICHT um die Nachfolge von @AndreaNahlesSPD. Das hat er seinen Fraktionskollegen in einem Brief mi…	NOT	NONE	hasoc_2020_de_2125
1124731994544529408	RT @Priiizzyy: *während klausur* ich: ok erste aufgab.. gehirn *denkt an ein song oder beat* ich: junge du hurensohn *konzentriere mich*…	NOT	NONE	hasoc_2020_de_2576
1124333170743230465	@InjaMorgan Deutsche Erotikliteratur ekelt mich an.	NOT	NONE	hasoc_2020_de_2270
1131945815726022657	fette fotzen kostenlos sexo directo gratis porno deutsche grosse pimmel deutsch blowjob porno https://t.co/q4IYVd3lN6	HOF	PRFN	hasoc_2020_de_1306
1134495872874688515	@yung_arkan2 Also stimmt die Lieferzeit? Kann dann direkt wieder stornieren bin ab 9.6 weg	NOT	NONE	hasoc_2020_de_3444
1134198588978937856	@_Apuleius Ach Sie haben auch die Merkel mit ihrem neuen Doktorhut aus den USA gesehen?	NOT	NONE	hasoc_2020_de_1301
1127604446849110019	Neueste Bilder : 12.05.2019 von MolligeKleineSie83 -&gt; Mein Geiler Arsch https://t.co/bzbpPlIsgw	HOF	PRFN	hasoc_2020_de_748
1132205959059787776	@Amunet_AC Wie bitte? Ich schlecht über sie reden? Vor ihm? Sehe ich so dumm aus?	NOT	NONE	hasoc_2020_de_3279
1131603103332093952	RT @DanielRSchmidt: Leben Sie wohl, Judith Kerr! "Als Hitler das rosa Kaninchen stahl" war in meinem Leben meine erste Konfrontation mit Au…	NOT	NONE	hasoc_2020_de_104
1130147558230245378	@HannahNeedsHugs hört sich an wie bunny huh	NOT	NONE	hasoc_2020_de_2423
1131133106411495425	dicke titten haarige muschi deutsch versauter porno geschlechtsverkehr ficken deutsche frauenporno https://t.co/Hgov2GOa6e	HOF	PRFN	hasoc_2020_de_24
1124206985103204352	@zeitonline Krank ist das "neue Gesund". Stimmt, sieht man an unseren Politikern.	NOT	NONE	hasoc_2020_de_638
1126031884830564352	RT @FAZ_Politik: AfD-Chef Gauland: „Verfasster Islam nicht mit Grundgesetz vereinbar“ https://t.co/EApO3A0HQt	NOT	NONE	hasoc_2020_de_3351
1134118632961773568	RT @dieseratze: Da krieg ich schon wieder das Kotzen, wenn ich den Meuthen reden höre. #AnneWill #fckafd	HOF	PRFN	hasoc_2020_de_1483
1134316545394372608	RT @EngelGert: @Musclebear66 @mariomayl @utawie Wäre ich #Trump, würde ich #Merkel nicht wieder herauslassen. 😂😂😂 https://t.co/ZsstLjla1D	NOT	NONE	hasoc_2020_de_2237
1133622497117712389	@M_a_x_i_m95 Voll geiler Arsch	HOF	PRFN	hasoc_2020_de_3344
1133286810212360193	RT @StefanHechl: Das ist halt echt aus dem Playbook der 1930er https://t.co/zyOwVwqWFd	NOT	NONE	hasoc_2020_de_98
1124638256031834112	RT @glitzeratom: Nichts hasse ich so sehr wie andere Mütter, die sich in ihrer Selbsterhöhung suhlen. Jedes Kind tickt anders. Es gibt nich…	NOT	NONE	hasoc_2020_de_562
1129500922365841408	RT @krippmarie: Das sind die Pappnasen und Politclowns, die über die Zukunft von Europa und von uns allen bestimmen wollen und sich für sch…	NOT	NONE	hasoc_2020_de_1096
1132421303003168772	@Lizarussiahorny Aber ob du wirklich den geilsten Arsch hast, musst du erst noch beweisen 😎	HOF	PRFN	hasoc_2020_de_2728
1130025197795500032	@helllud123 @tagesschau Schwachsinn 🤕	NOT	NONE	hasoc_2020_de_1910
1133427357140836352	Kostenlose dicke deutsche fisten. Geile nachbarin gebumst porno sado gratis. https://t.co/PumuqxZUdp	HOF	PRFN	hasoc_2020_de_3091
1132683048519118850	Die grünen #Europawahl2019 https://t.co/BHWUH7d01c	NOT	NONE	hasoc_2020_de_1400
1125950934759112707	@welt Barley, europäische Noch Mirbürgerin, Halts Maul!	HOF	PRFN	hasoc_2020_de_223
1124021835962769414	@phiIosoph stimmt halt	NOT	NONE	hasoc_2020_de_1809
1133995018421723136	@FrikaWies @stoeckli_martin Und solche Winkelzüge zeigen einmal mehr, daß der Islam moralisch sehr einseitig orientiert ist.	NOT	NONE	hasoc_2020_de_2181
1134354323503292416	RT @augenaufDE: #Grüne ,#Linke ist das die "Vielfalt", die ihr so gerne haben möchtet? Denn was ihr hier sieht, ist Fakt! https://t.co/OFab…	NOT	NONE	hasoc_2020_de_2492
1133831428007968772	@ExGruene @SchmiddieMaik Josephine ist jetzt schon so dumm dass man eindeutig sagen kann aus der wird nie etwas werden ..	HOF	PRFN	hasoc_2020_de_2246
1128529592858361856	Schafft die Linken und ihres gleichen ab. Linke fordern Ausrufung von Klimanotstand und Verabschiedung eines Klimas… https://t.co/MP4c6lxNBs	NOT	NONE	hasoc_2020_de_3355
1132721837450907648	RT @tagesschau: Grafiken: Warum sind die Grünen so stark? https://t.co/1Kc8w559gg #Europawahl2019 #EUWahl19 #Grüne	NOT	NONE	hasoc_2020_de_2460
1134166200588603393	Mann Frau Hurensohn	HOF	PRFN	hasoc_2020_de_2293
1132688635369857024	Wieviel Plätze haben die deutschen Grünen denn bald in Brüssel?	NOT	NONE	hasoc_2020_de_3294
1131149195761598465	fotos von behaarten muschis porno auf deutsche deutsche dominanz porno porno fetish gratis https://t.co/hEhzJjuINA	HOF	PRFN	hasoc_2020_de_2911
1126166287116378112	Branchenblätter brauchen Headlines, diese ist allerdings selten dämlich. Mein Eindruck auf der OMR war ein völlig.… https://t.co/Y6vqrhnU4z	NOT	NONE	hasoc_2020_de_1861
1128709432043556866	@Lalilein_ Teste die grüne! Ich will die grüne sehen! 😂	NOT	NONE	hasoc_2020_de_1485
1124028647474704384	@woelken Einfach nicht mit der Kniekehle zucken. https://t.co/fYaA7dw2ke	NOT	NONE	hasoc_2020_de_3182
1131308990372175874	Wo sind denn hier die ganzen #Hambi Leute? Wo sind die #Linke Aktivisten? Keiner da? Oh komisch. Und wieder hat hie… https://t.co/gzdZlgiO9N	NOT	NONE	hasoc_2020_de_1868
1131215713241391107	@maxotte_says Die grünen Philosophen an der Uni Köln, die Sie in deren schäbigen grauen Gebäude schon kennenlernten… https://t.co/YvnlRcImG1	NOT	NONE	hasoc_2020_de_3068
1131969333205307399	CN: Daesh-Propaganda Viel Glück ihr scheiß Ottos	NOT	NONE	hasoc_2020_de_1039
1123550379386519554	RT @sixtus: "Ich hätte gerne 400 Gramm Hüftsteak!" "Steak gibt es nur als ganze Kuh im Abo!" Wenn Online-Medien Metzgereien betreiben würde…	NOT	NONE	hasoc_2020_de_829
1131587957708734464	@Bordeauxdogge2 Also, wir trainieren mit dem Trockenfutter und als Snack gibt es eher mal ein Stückchen Käse oder J… https://t.co/FoDsn5DDVy	NOT	NONE	hasoc_2020_de_2581
1124321535727144960	@einerhgw @SPIEGELONLINE Also sind alle, die anders denken als du, dumm?	NOT	NONE	hasoc_2020_de_3036
1134485437437923333	#S11 Teilausfall ab #Bergisch #Gladbach (17:33), über #Köln Hbf (17:54), Dormagen (18:27), #Neuss Hbf (18:45) &gt;… https://t.co/IgpCqAbaLv	NOT	NONE	hasoc_2020_de_2409
1129457783961718785	@StBrandner Die GRÜNEN outen sich auch als Sprachrohr der Pädophilen und Kinderschänder und fordern nach einem Kind… https://t.co/tmi06q2zyL	HOF	HATE	hasoc_2020_de_1014
1131651560142983168	RT @tagesschau: OVG Bautzen: NPD-Wahlplakate sind volksverhetzend https://t.co/LvDGi5zHFz #NPD #Wahlplakate #OVGBautzen	NOT	NONE	hasoc_2020_de_2044
1125019207882686465	Ich könnte so in strahlen kotzen, 2 Leute aus meinem Jahrgang stellen sich als Kanidaten für den Bürgerrat auf und gehören zur AfD	NOT	NONE	hasoc_2020_de_1494
1133993583994966017	An all die Frauen mit Vaterkomplex: meldet euch mal	NOT	NONE	hasoc_2020_de_2734
1127117572032409600	@gayspacegulag Wir waren Könige und Scheisse, neger	HOF	PRFN	hasoc_2020_de_3490
1127299202193723393	RT @PoggenburgAndre: Linke Ideologen und Medien sprechen mittlerweile immer öfter von gesellschaftlicher Rückentwicklung durch #Rechtsruck.…	NOT	NONE	hasoc_2020_de_1901
1129769949235490816	RT @Complaxes: Könnte kotzen. Ich hasse die Fans unseres Vereins. https://t.co/GS0hXKPzbn	HOF	HATE	hasoc_2020_de_3018
1125808496186941444	RT @FussiRud: Wie kommt IHR NAZIS immer auf das unsägliche Wort UMVOLKUNG? Unsere BEVÖLKERUNG wird VEREDELT und zwar nachhaltig! https://t.…	HOF	HATE	hasoc_2020_de_1060
1124238920550637570	@bzberlin Super, wie er die grenzenlose Dummheit der Roten schön verbreitet. Der ist so hohl, der passt eigentlich eher zu Grün.	HOF	HATE	hasoc_2020_de_30
1133461968554217477	warum muss ich mir immer so traurigen scheiß geben?	NOT	NONE	hasoc_2020_de_2461
1133473301534257154	Eva Herman: Ihr seid Idioten!	NOT	NONE	hasoc_2020_de_498
1123593832392810497	RT @schweizok2: Erding: Grüne Stadträtin verleumdet Stürzenberger „Verurteilter Nazi“ !!! (Video) https://t.co/mKu1Qh2jNZ	HOF	OFFN	hasoc_2020_de_2956
1128747684087705600	RT @Thorsten0711: Senioren überfallen und misshandeln. Dreckiger Abschaum. #AktenzeichenXY	HOF	HATE	hasoc_2020_de_3049
1134338179635580928	RT @AufgewachteWelt: Gute Tag Frau Merkel, Gratulation zu Ihrem weiteren Verrat an uns Deutsche! Sie bekommen einen Ehrendoktortitel für Ih…	NOT	NONE	hasoc_2020_de_2871
1133113396713480192	fickt jeden eurer SIE tweets in den arsch	HOF	PRFN	hasoc_2020_de_1944
1129522158139527170	Seo ist einfach oder? #seo https://t.co/sUzz9BYsBv	NOT	NONE	hasoc_2020_de_2157
1134486284670513154	Ende des linken Aufschwungs in Europa? https://t.co/3ARz2WX3cq	NOT	NONE	hasoc_2020_de_55
1126020006582599680	@tiptopgeheim Hoffentlich hat es mit der Ermordung der Leute die im 1.Stock über uns wohnen zutun Der Hurensohn me… https://t.co/VhdMdX8VNA	HOF	OFFN	hasoc_2020_de_1247
1125329636689416192	@RudolfZlabinger @HeikoMaas @SawsanChebli ZDF - Mitarbeiter und Grünen Aktivist zeigt öffentlich den Hitlergruss. S… https://t.co/fQMlntYRM6	NOT	NONE	hasoc_2020_de_2611
1128835999356686336	EIN WORT AUS DEINER FRESSE UND ICH BOX DICH AUS DEN LATSCHEN	HOF	PRFN	hasoc_2020_de_1586
1125879581246992384	@airliners_de Hat Airbus doch schon, der Typ ist überhaupt nicht informiert: https://t.co/eND8FAXIpE @Der_Postillon	NOT	NONE	hasoc_2020_de_1164
1126975800358658050	Weil die krank doof und pervers ist Alles was die so lieben Absolute Nazi scheisse Witten	HOF	PRFN	hasoc_2020_de_2643
1125125705442963457	@ArminSchon Scheiß Lilien. 😊	HOF	PRFN	hasoc_2020_de_1959
1133417144031621120	@mspazieren Ist einfach so DD:	NOT	NONE	hasoc_2020_de_715
1133011122821447685	@MissBJArmstrong Ich könnte mir Frau Roth als Präsidentin der Türkei vorstellen.	NOT	NONE	hasoc_2020_de_1508
1127245468965265409	@Mupfmama Der Mupf erfindet einfach die kreativsten und sinnigsten Wortneuschöpfungen 😍👏	NOT	NONE	hasoc_2020_de_3008
1134481666750238720	Du bist schon einfach verdammt geil!	NOT	NONE	hasoc_2020_de_518
1128657695307857920	@juussyyy So viel könnte ich nicht mal kotzen	NOT	NONE	hasoc_2020_de_3074
1123864184658309122	@Hallo_Rollo Es gibt nicht DAS System, das alle(!) zufrieden stimmt	NOT	NONE	hasoc_2020_de_100
1124293219985035264	@PoetMehmet Alle Frauen sind halt Schlampen die in die Küche sollen	HOF	HATE	hasoc_2020_de_3069
1131457829443899393	@sven_giegold Noch witziger ist dass Merkel überhaupt keine Rolle spielt! Merkel regiert Deutschland. Merkel ist fü… https://t.co/X5vpPpIk5f	NOT	NONE	hasoc_2020_de_1426
1128210372765286400	RT @Schwulemiker: Der Linke hasst jeden, der sich etwas aufgebaut, etwas geleistet hat. Denn diese Menschen führen dem Linken täglich vor,…	HOF	HATE	hasoc_2020_de_1481
1125831086737588224	@Borussen_Tom09 @EAFussball Die wahren Idioten sind die, die sich über Spiele aufregen. Bzw weekend League, was au… https://t.co/kVh1fcUfcF	NOT	NONE	hasoc_2020_de_3377
1126746606810779648	RT @psychomolehappy: die die jetzt schreiben ihnen war klar dass gzuz frauen schlägt und scheiße ist haltet die fresse es geht nicht um euc…	HOF	PRFN	hasoc_2020_de_2530
1124336920438374402	Raste du doch mal gegen Nazis aus und nicht nur gegen Linke. So 'ne Schwätzerinnen hasse ich ja wie Rosenkohl.	HOF	OFFN	hasoc_2020_de_37
1133342820960546816	@krone_at Viele Massenzuwanderer haben keinerlei ökologisches Bewusstsein, kennen das nicht, und die Moslems hassen… https://t.co/fza2odWYuT	NOT	NONE	hasoc_2020_de_2843
1128029745063636992	Und mit Verlaub, bei so unreflektierten Kommentaren kenn ich nichts mehr. Keine Geduld für den Scheiß. Ich lass dic… https://t.co/lSmEYFw2a1	NOT	NONE	hasoc_2020_de_2429
1133136289207914497	RT @EvaMolau: Die @Ricarda_Lang wird vom CDU Typ permanent unterbrochen, geduzt, muss sich den größten Scheiß mansplainen lassen und ist tr…	HOF	PRFN	hasoc_2020_de_1753
1132725947885641730	@fiischyyy Ja, alle sind dumm, außer du!! Was für eine Logik	NOT	NONE	hasoc_2020_de_290
1132907934550233088	Ich glaube, die CDU ist einfach total am Arsch. https://t.co/c4li8L77Z5	HOF	PRFN	hasoc_2020_de_2159
1133742353569730561	@MarcelMolitor2 @CodeVeinGame Einfach im PSN eingeben. Das ist nur ein Anzeigefehler. :) /cd	NOT	NONE	hasoc_2020_de_2793
1130899982813466624	RT @der_Macco: Der @EkoFreezy hat den German Dream represented und ich geh jetzt mal kotzen	HOF	PRFN	hasoc_2020_de_101
1127928859469471744	Muahaha! Es gibt wirklich Leute, die glauben, daß man auf Bratzenbuch Links klickt. xD Wie dumm kann man sein? #niemalsFacebook	NOT	NONE	hasoc_2020_de_592
1131588477815070720	Manchmal wünsche ich mir Sternzeichen wären bedeutender stellt euch vor ich hätte so stierhörner die ich nazis ins arschloch jagen könnte 🤝😔	NOT	NONE	hasoc_2020_de_2562
1127122789750775808	@Ophelia_BDSM Nun habe ich Grillgeruch in der Nase und sehe eine fette Bratwurst vor mir.	NOT	NONE	hasoc_2020_de_2866
1124596350736392192	RT @pharaotom: Ich wünschte mein Arsch würde so gefickt werden ... https://t.co/1MjRkSbtsI	HOF	PRFN	hasoc_2020_de_1259
1126815846398156801	@kaadeeey @Pearsxon @Lxckz_ @EskalationzZ @zatox95 Dieser Fxbz gehört doch auch zu denen, hat auch immer sein Maul… https://t.co/pEdnEjhYVD	HOF	PRFN	hasoc_2020_de_2142
1128699965474312192	#Einhorngate bei der humorlosen #Linken: Der Ortsverband Schwäbisch #Gmünd distanziert sich von seiner Stadträtin C… https://t.co/bXFbUYRIQb	NOT	NONE	hasoc_2020_de_952
1134124874098728961	Mega heftiger deutscher porno, partnervermittlung italienische frauen. Monster schwanz porno, deutsche mutter desso… https://t.co/UHj7wYJqWk	HOF	PRFN	hasoc_2020_de_1067
1134016942057152512	@WasdGes @Dior20001 Aber warum macht man so dumme „Abkürzungen“ anstatt einfach das richtige Wort zu schreiben	NOT	NONE	hasoc_2020_de_3220
1129309150389952512	RT @ein_prozent: Horst #Seehofer galt lange als „konservativer“ Gegenpol zu Angela #Merkel. Mittlerweile zeigt der „Heimatminister“ sein wa…	NOT	NONE	hasoc_2020_de_3223
1133019691784507393	@teite99 @KrahMax Dem Gesicht nach der Abstimmung nach zu urteilen, hat Kurz das nicht erwartet.	NOT	NONE	hasoc_2020_de_2969
1132726539286700032	@KioskMein @99Bluemarlin @tagesschau Dann ist dasLand aber schon am Boden.	NOT	NONE	hasoc_2020_de_2512
1134147342964318208	Geile opoe fette schlampe wird gefickt. Saubere deutsche pornos, freie deutsche sexfilme. https://t.co/ZWYPspnsxr	HOF	PRFN	hasoc_2020_de_849
1131099480663699456	Ach, alter, Marcel, ey, scheiß auf die Mille, man Scheiß auf's Geld, ich brauch 'Ne Pille, 'ne Pille, 'ne Pille, 'n… https://t.co/MRjNxobjqy	HOF	PRFN	hasoc_2020_de_2004
1134001456703557632	RT @Ritter_Roter: Cambridge-Wissenschaftler: „Frau Merkels #CDU Doktorarbeit ist Bullshit“ #Merkel hat lediglich aus 145 Quellen abges…	HOF	OFFN	hasoc_2020_de_21
1127240700020559873	@ZDFheute Oder alle Asylanten ausweisen. .	HOF	HATE	hasoc_2020_de_2436
1125481353070501888	RT @DingenskirchenJ: #Fanpost ... wenn Dir das deutsche Nazi-Pack nicht mehr reicht, dann läd man sich halt noch ein paar Erdogan-Trolle ei…	HOF	HATE	hasoc_2020_de_3204
1127239970199150593	@PlayoffCaleb eFG &gt; TS &gt; FG	NOT	NONE	hasoc_2020_de_43
1133407367100534784	@tagesschau @tagesschau Wieso ist die Landesmedienanstalt so veraltet? Sie ist kein Stück besser als die Politik momentan...	NOT	NONE	hasoc_2020_de_2084
1126751195375161345	Pack dann aus Spaß an der Freude Ein stark pharmazeutisches Markenerzeugnis In den Arsch deiner Freundin	HOF	PRFN	hasoc_2020_de_263
1132447488017936384	@schaefer_vgtlnd Und seinen Arsch riskieren 💪 Wenn es gegen die verblödung geht auch seinen Job.	NOT	NONE	hasoc_2020_de_3026
1127197007972585472	@HeltedSkelted jedes scheiß Konzert auf dem ich in Berlin war war so	HOF	PRFN	hasoc_2020_de_3265
1128630029678776321	@COMPACTMagazin kriminelle ausländer abschieben, war das nicht euer credo? warum nicht hier?	NOT	NONE	hasoc_2020_de_2325
1129037787301339136	https://t.co/ykxdOebkNQ Mir kommt einfach nur das Kotzen!	NOT	NONE	hasoc_2020_de_622
1125850758019203075	@SapereAudeDE @LanaS08819497 Vor allem motiviert, sich in die soziale Hängematte zu legen, die der dumme deutsche S… https://t.co/uRXsH2CGXS	HOF	HATE	hasoc_2020_de_274
1123999866160545796	@achtmannstark ja das schon, das ist ein Hurensohn move, keine Frage	HOF	PRFN	hasoc_2020_de_277
1134026198911213568	RT @gerlet1: Meines Verachtens, labern Sie Scheiße. Unerhört.	HOF	PRFN	hasoc_2020_de_65
1133457098946306049	@zick_le2jh Ist echt so... ich wusste halt nicht was ich tun sollte und hatte Panik, also hab ich um Hilfe gerufen,… https://t.co/vFwHkP9Xot	NOT	NONE	hasoc_2020_de_142
1123657451591618563	RT @Ijoba_xpensive: DJ Zinhle X Dammy Krane X Gabriel Youngstar – Heavy Duty https://t.co/oRUavR8iy4	NOT	NONE	hasoc_2020_de_3332
1123669711521185793	@plusdemurs @DrDavidBerger Und genannt wird das ganze dann "Saalschutz", hm? "Stoßtrupp Adolf Hitler" war auch mal… https://t.co/i0PD043kke	HOF	OFFN	hasoc_2020_de_1779
1130752125208879104	haltet doch einfach eure fresse	HOF	PRFN	hasoc_2020_de_229
1125191551850774529	Warum ziehen die vor dem abspritzen immer den Schwanz aus dem Arsch! Das macht doch niemand in der Realität! Das is… https://t.co/OnekWsLDiW	HOF	PRFN	hasoc_2020_de_3455
1123687222774042630	@queer_de Das ist ja genauso wie der gleiche Scheiß mit Scientology damals die an den Schulen geworben haben für keine Drogen	HOF	PRFN	hasoc_2020_de_2655
1126925254817984512	@Melodygahlen Geiler Arsch	HOF	PRFN	hasoc_2020_de_2778
1130859218372825092	es gibt tatsächlich Tage an denen ich mir selbst Sigmar Gabriel zurückwünsche https://t.co/YDWG5WS79L	NOT	NONE	hasoc_2020_de_878
1129709928715870209	RT @MarcusErlebach: Ja das stimmt süße und einen geilen prallen arsch. 😋😍😍😘😘 https://t.co/AAPb7hN1p4	HOF	PRFN	hasoc_2020_de_1416
1124170184284102657	Hoffentlich fault euch das Hirn ab!	HOF	OFFN	hasoc_2020_de_2790
1123628661897404417	RT @badespassbarbie: wer meint, dass gewalt immer scheiße ist, auch gegen nazis, dem empfehle ich sich mit vertriebenen zu unterhalten, nac…	HOF	PRFN	hasoc_2020_de_2554
1133994959705706496	RT @SebGreiner: Merkel ist jetzt also wirklich die Kanzlerin des Atomausstiegs. Dass ihr Atomausstieg völlig unnötig gewesen wäre, wenn ihr…	NOT	NONE	hasoc_2020_de_2156
1133684325382283266	@Telekom_hilft Achja Telekom ihr macht euch bei mir mal wieder unbeliebt.. Nicht nur dass es speed on erst ab magen… https://t.co/vK1gpcA1qS	NOT	NONE	hasoc_2020_de_1793
1131643670631997442	N E I N N E I N N E I N Einfach N E I N ! #GNTM #GNTMFinale #GNTM2019	NOT	NONE	hasoc_2020_de_1093
1126838931834720256	Hocke meinen Arsch ins Auto und fahre 30min zu meiner Schwester. Dort angekommen klingel ich schon dezent verzweife… https://t.co/UmYWMdfyJG	HOF	PRFN	hasoc_2020_de_1099
1125858643314905089	@andy93893217 Alles Arsch	HOF	PRFN	hasoc_2020_de_344
1126071760099708928	Fraktionen beklagen Ausschluss: Grüne und Linke attackieren Seehofer wegen Einheitsfeier https://t.co/sgSOEWNJZa	NOT	NONE	hasoc_2020_de_1469
1133086477666136064	RT @zeitonline: "@FridayForFuture war eine Wahlkampfmaschine für die Grünen", sagt Wolfgang Merkel vom @WZB_Berlin. Mit den jungen Wählern…	NOT	NONE	hasoc_2020_de_2
1129705893812158464	RT @_krillin: ich würde lügen wenn ich sagen würde ich hatte noch nie probleme zwei türken auseinanderzuhalten	NOT	NONE	hasoc_2020_de_1837
1131069701134659584	Schlussmachen läuft halt nicht immer so einfach 😂 alles sehen: https://t.co/qJYjHRgIWX https://t.co/JKrZEWwN8d	NOT	NONE	hasoc_2020_de_1101
1130903480842051584	@bakaray_ #NiemehrCDU ist einfach noch zu freundlich als # , wenn schon dann #NiemalsCDU	NOT	NONE	hasoc_2020_de_2688
1124980725160259584	@FCBayern Einfach geiler Typ💪🏿 https://t.co/6lBCUR8TDK	NOT	NONE	hasoc_2020_de_1425
1132423769245528064	Abschaum und unter aller Sau... sorry, da fält mir kein anderer Vergleich ein.	NOT	NONE	hasoc_2020_de_1292
1132804674971668485	Dank diesen hurensohn Newcomern haben Haft und Xatar beef ihr hurensohn Newcomer	HOF	PRFN	hasoc_2020_de_1512
1131572757567823873	@welt Also Rezo möchte kurz vor den Europawahlen sich als Hampelmännchen für die Grünen verdingen. Und trommelt in… https://t.co/rdbaAKsr77	NOT	NONE	hasoc_2020_de_203
1131953956878508032	RT @IShaiqz: @RRivexx halt doch einfach dein scheiß maul wenn du 0,0 ahnung hast du hurensohn	HOF	OFFN	hasoc_2020_de_156
1123923940877975554	Lass uns einfach mal Dopamin vergeuden ✨	NOT	NONE	hasoc_2020_de_1233
1125396254823976960	@DracheSchaut Hätte mich auch gewundert wenn copy und paste zu einfach wäre	NOT	NONE	hasoc_2020_de_2154
1134052815956041728	@andreas_bvb Balerdi, Schulz sind doch Abwehrspieler	NOT	NONE	hasoc_2020_de_3304
1133180157441843200	RT @pepper46477330: Cambridge-Wissenschaftler: „Frau Merkels Doktorarbeit ist Bullshit“ - https://t.co/UNIwTgjd1O	HOF	PRFN	hasoc_2020_de_1106
1131465551136591872	@SPIEGELONLINE Was für eine Enttäuschung, diese Luftnummer von Merkels Hofnarr.	NOT	NONE	hasoc_2020_de_1385
1134226002958327809	RT @tagesschau: Merkel spricht vor Harvard-Studierenden https://t.co/LeddGw939m	NOT	NONE	hasoc_2020_de_3112
1125753148168200195	Zieht euch mal den Stock aus dem Arsch, alle die wegen der #Edeka Werbung rumheulen. Verständlich das Deutsche als… https://t.co/76sTjRaQo6	NOT	NONE	hasoc_2020_de_371
1127338012080312325	RT @SylviaPantel: Mit @HGMaassen und Sigrid 'HerrmannMarschall bei der Veranstaltung des Berliner Kreises "Passt der politische Islam in ei…	NOT	NONE	hasoc_2020_de_2311
1133476019464298498	Porno gratis per deutsche frauen filme. Putze ficken deutsche teen fotzen. https://t.co/2DK2qfxYTD	HOF	PRFN	hasoc_2020_de_2432
1128386575476371457	da gibts halt einfach echt ultra den nicen stuff so kann sein dass die mega evil sind kapitalismus und so aber bla	NOT	NONE	hasoc_2020_de_272
1129294000589103104	RT @chrizzie93: Die Grünen sind halt im Trend. #schlagabtausch https://t.co/UiTIARD974	NOT	NONE	hasoc_2020_de_2186
1129728404650110976	@der_andre09 @19Mei89 @mone_0610 @FloBVB666 @borusse08 @xvoffo Gruss zurück	NOT	NONE	hasoc_2020_de_2672
1130144106292883456	@tagesschau Ich hätte ein Rezept gegen rechts: Man sollte #Europa einfach mit mehr illegalen und legalen Sozialsstaats-Bereicherern fluten.	NOT	NONE	hasoc_2020_de_1443
1130082563282931714	RT @city0815: am meisten hasse ich die linken mittlerweile dafür, dass ich bereits anfange, rechte zu verteidigen. 🙄	HOF	HATE	hasoc_2020_de_1133
1128031670274150400	ICH FICK DICH IN DEN ARSCH! KANACKE! ICH FICK DICH IN DEN ARSCH!	HOF	HATE	hasoc_2020_de_2091
1124948722599833600	@Anabell2301 Willkommen zurück!	NOT	NONE	hasoc_2020_de_1865
1127326746183860225	@AndreaSchlegel3 @sheelockmaier Jegliches Wort vom Islam bestätigt seine Rückständigkeit und Inkompatibilität. Jedes.	HOF	HATE	hasoc_2020_de_434
1128843934959054848	RT @TradeMonkeys: Movement chart $TTCM —&gt; $IBGR —&gt; $KRFG 💥💥💥💥💥💥💥	NOT	NONE	hasoc_2020_de_755
1130924162959257600	canales porn gratis kostenlose deutsche aupair porno emoticon sesso gratis porno gratis anale https://t.co/v9wDRJOt5I	HOF	PRFN	hasoc_2020_de_2433
1129832096229462016	RT @ddrmuseum: Ab 1977 gab es in der DDR die Pocketkamera „Pentacon K16“. Sie war ideal für das Negativformat 13x17mm. #MuseumWeek #PhotoMW…	NOT	NONE	hasoc_2020_de_2412
1125882185926443011	@timo_reeg @fifaprogamer213 @AGlibic @mxlanax Wir sind uns aber einig, dass gökan einfach scheiße dumm ist, oder?	HOF	PRFN	hasoc_2020_de_395
1127877521201143808	@DerSchulze Einfach ins Fediverse wechseln... Da kann man viel leichter die #AFD Nazi Schweine als Nazi Schweine be… https://t.co/UQrrNHQC5K	HOF	OFFN	hasoc_2020_de_1924
1124465542969143297	RT @Tobias_B: Können wir jetzt dem Berliner Landesverband der Grünen 'ne fette Rechnung fürs Tempelhofer Feld schicken? https://t.co/i6ZEgy…	NOT	NONE	hasoc_2020_de_2990
1123866936109162498	RT @gerhardschwar11: @Virgen48 @DerWanderer4 Nazis sind keine Samba-Truppe..!👍	NOT	NONE	hasoc_2020_de_1080
1129786126645047297	@55Uli Was hat uns Merkel da nur reingeholt!	NOT	NONE	hasoc_2020_de_2235
1131138898762051584	#UCIWWT #Emakumeen #Bira (2.UWT): ⏰ 22.05. - 25.05. 📜 Startliste &gt; https://t.co/AxGr23Ote6 🚵‍♀️ Etappenprofile &gt;… https://t.co/BdKnfStSrm	NOT	NONE	hasoc_2020_de_3402
1124751359633436674	@Final_Ace_ Weil du dumm bist. :|	HOF	OFFN	hasoc_2020_de_317
1125152213440057344	RT @Hartes_Geld: Ich "oute" mich mal: Bin "Sexist": Ja, mir gefallen schöne Frauen! Bin "Rassist": Ja, mir werden die Moslems hier langsam…	NOT	NONE	hasoc_2020_de_1889
1127475685898039296	RT @Tevsa: EU-Sondergipfel: Merkel traut in der EU keiner mehr über den Weg Angela Merkel - Persona non grata https://t.co/q4BzBvlsLq	NOT	NONE	hasoc_2020_de_2047
1126160020830212102	@jemxkn henlo (ate) jem hnnnng :’&gt; https://t.co/KZI3bZ2W5H	NOT	NONE	hasoc_2020_de_867
1124630483990663169	@fabigumPEYT @OrtLeit @HoxAtBox @SnowOwlem DEUTSCHE MARKENBUTTER	NOT	NONE	hasoc_2020_de_222
1127303618762350606	RT @Backstage0000: Priorität: Merkel muß weg. Sie ist eine linksradikale häßliche Alte?	HOF	OFFN	hasoc_2020_de_1973
1131139972499693568	@Lara_Loft Ich glaube ja wenn man bekannter ist im Internet muss man mittlerweile ein ganz viel Leck mich am Arsch… https://t.co/buzFEseAIe	HOF	PRFN	hasoc_2020_de_747
1132187323746181120	RT @Seb_Baehr: "Geflüchtete Frauen müssen nach der Geburt ihrer Kinder zurück nach #Moria, dort leben sie dann in Zelten oder Baracken. Das…	NOT	NONE	hasoc_2020_de_2867
1123851392031051778	RT @MOKoffiziell: diese dinger machen frauen 9000% unattraktiver https://t.co/jCBoQZDAQa	NOT	NONE	hasoc_2020_de_226
1131285380605435904	Brandt. 💤 Schulz. 💤 Hazard 💤 Mateu Morey 💤 @IlkayGuendogan 😳	NOT	NONE	hasoc_2020_de_2097
1133358960638087168	@VolkerWeise @MaPhiMoTo Stimmt.....siehe , auch Grüne	NOT	NONE	hasoc_2020_de_717
1128762901026701312	@Juliahorny1 Geiler Arsch	HOF	PRFN	hasoc_2020_de_1006
1129056036730613761	https://t.co/Zb3UbBhV0d wie fucking cringe können "Politiker" sein?	NOT	NONE	hasoc_2020_de_2122
1130759343576690688	RT @salsapicantona: Die spanische Generalanwaltschaft erklärt, wie Hassverbrechen interpretiert werden müssen: "Hass gegen Nazis ist Verbre…	NOT	NONE	hasoc_2020_de_2528
1134558460278976514	RT @AufgewachteWelt: Ich eruiere: Merkel gibt CNN(Clinton NextNews) ein Interview. Merkel erhält von Obamas Harvad-Universität eine Ehrend…	NOT	NONE	hasoc_2020_de_3146
1129405480961339392	▶ Deutsche Post: Zurück auf Wachstumspfad - Aktienanalyse: Kulmbach (https://t.co/YP8xX5QCDa) - Deutsche Post-Aktie… https://t.co/v8kfHtQ4sD	NOT	NONE	hasoc_2020_de_641
1131616340555575298	@extrakaese Das hört sich nach Frustessen an!	NOT	NONE	hasoc_2020_de_2284
1131498526763040768	@jansen_hh @ZDFheute 😂 stimmt auch wieder	NOT	NONE	hasoc_2020_de_1703
1126090961585672192	RT @impFanOffiziell: Die Grünen so: Reduziert mal pls Zucker, das ist ungesund Grüne Jugend so: fresst mehr Torte Leude, ist doch egal ob i…	NOT	NONE	hasoc_2020_de_2073
1123872527091150848	@PSPresseschau @Dr_Huettl @janboehm Mir macht ein „demokratisches“ System, das Polizei benützt, um Nazis zu schütze… https://t.co/eteydD5dcN	NOT	NONE	hasoc_2020_de_153
1129018766145327104	@Hansmll89138006 @derherrz Lächerlicher Appell an die Historie. Das ist kein Argument, scheiß auf Religion.	NOT	NONE	hasoc_2020_de_1202
1133302765340581888	@LoetzschMdB Die Linken und ihre politischen Altvorderen haben schein einmal einen deutschen Staat an die Wand gef… https://t.co/nncgbkFqbX	NOT	NONE	hasoc_2020_de_2405
1128343382542123008	Wie mir diese scheiß Lautstärke der Ps4 auf den Sack geht was ein Haufen unnützer Plastikscheiße.	HOF	PRFN	hasoc_2020_de_77
1134468198861103107	RT @MOKoffizieIl: deutsche street fighter https://t.co/Rc9r7n8O2f	NOT	NONE	hasoc_2020_de_1466
1129504319739432961	RT @AZeckenbiss: Die Nazi-Hooligans #SteelerJungs aus #Essen, dumm wie eine Scheibe Knäckebrot. Linke tragen #Lonsdale, wundert sich der F…	NOT	NONE	hasoc_2020_de_3427
1125148191136129024	#gaysex #kostenlos Fick den verdammten Arsch (19:33) Anal, Braune - https://t.co/z5LjOAWjNu	HOF	PRFN	hasoc_2020_de_658
1131284776634208258	RT @AJ79er: @hyracexd Hab den Hurensohn 2 mal gezogen 😂😂😂	HOF	PRFN	hasoc_2020_de_838
1123513293371527168	Es ist eine Schande, dass am #1Mai Nazis unterwegs sind. Deren geistige Vorgänger verboten am 2. Mai 1933 die Gewer… https://t.co/BWI7mYCGe0	NOT	NONE	hasoc_2020_de_2902
[truncated: 374 more rows]
