# Supplementary material
Source: ML conference proceedings conference paper supplement (https://aclanthology.org/2024.emnlp-main.886)
Supplement: software [file HateXplain.xlsx]

## Sheet: Sheet1
text	label
u really think i would not have been raped by feral hindu or muslim back in india or bangladesh and a neo nazi would rape me as well just to see me cry	2
the uk has threatened to return radioactive waste to the eu if an agreement cannot be reached can not we keep the radioactive waste and send back all the paki migrants instead	2
if english is not imposition then hindi is also not imposition shut up chutiya retards stophindiimposition	2
no liberal congratulated hindu refugees post cab because they hate hindus	2
he said bro even your texts sound redneck whatever the fuck that means 😂 🤷 🏻 ‍ ♂️ <user>	2
i live and work with many legal mexican immigrants who are great citizens and trump supporters they have no problem with deporting illegals maga	1
in britain the prime minister a childless woman london mayor a moslem invader in command of london police a lesbian in command of london fire brigade a fat woman scotland first minister a childless woman	0
<user> <user> there shd be a film called no hindus in kashmir wud be perfect islamic fanaticsm movement in kashmir	1
jews defends jews regardless muslims defend muslins regardless christian european attack christians christian people are on their own and jews and muslims have another home we don ffs we do not why can not people understand that it not that difficult	1
the non partisan congressional budget office cbo has released their report on sens lindsey graham and dick durbin <number> the dream act the report shows that their legislation would add <number> billion to the deficit over a ten year period and lots more immigrant scum	0
got a couple more companies you can boycott this christmas season first one is ford they have got several <number> ads out featuring blip length shots of white men w other than white women this is becoming the norm too you defile the white man that will drive our women into their hands wn	1
people are going to blame the white nationalists for what happened but they were initially peaceful before antifa showed up what happened yesterday is the result of political correctness and the left legitimising political violence that why the establishment leftists do not condemn antifa <number> <number>	1
you are completely correct without it communication breaks down leading to distortions misrepresentations this is a very serious problem among white males who failed to learn the language effectively	1
caucasians wearing masks to prevent coronavirus and still don ’ t wash their hands	1
<user> <number> americans dead because of an illegal immigrant this is infuriating enforce our laws deport them	0
<user> besudes guilt saviour complex among whites has reached such an alarming level that they want to save indian girls from being raped when the rate of sexual assault in their own countries is significantly higher	1
thank a white man you live in his world and why do you islanders say you are canadian so rude really if i lived in a brown country even with citizenship i would never call myself ethiopian chinese indian you are a caribbean living in canada	0
nigger faggot retard beaner dishwasher time to see if i get ban	0
your idea of compassion is allowing kate steinle killer go free that not compassion it a mental illness let be compassionate to the legal citizens of this country stop funding illegal immigrants stop encouraging lawlessness and build that fucking wall maga gabfam news	1
why don ’ t white boys with curly hair comb it looks like a bird ’ nest	1
blow a stack for yo niggas with yo trapping ass	1
<user> yes they put fear in black people jews and even white civil rights workers and they deny the holocaust ever happened	1
they playing a lot of ethnic music at this white ass wedding	1
that a retarded non argument the bible is also a best seller in communist china	0
<user> i think immigrants should replace people like you	1
every time a nigger in africa gets pregnant abort it make it a law you can about up to <number> years	0
nothing royal about this wedding he is a bastard and she is a nignog halfbreed thot and a divorced catholic to boot it is notable that both the father of the bride and the father of the groom did not attend	0
what sort of white man or woman would vote for this nigger	0
diversity is a code word for white genocide immigrants contribute and integrate 3 rd world retards freeload and fornicate	0
im literally not a zionist but dear lord how hard is it to just recognize that people just genuinely despise jews	1
hindu army ’ disrespecting islam now 🙄 acting like your countries don ’ t mass murder them on a bi yearly basis stfu	2
stupid nigger given grades admissioin to school job degree position he never earned and doesnt have iq for fuck off	0
<user> humor negro 😂 😂 😂 😂 😂	1
bump dis nigger	0
would be hilarious if the un building was turned into homeless shelter or hell why not a refugee center	1
i am confused how a president blocked stimulus checks for those who married to immigrants while he himself married to an immigrant	1
how pissed are you if you are japanese chinese korean ya know real asians and now the goat fuckers are called asian too to avoid calling them arabs	0
i ’ ve always wanted to beat up a nigga in front of his child so the child can grow up and remember it forever	0
they used to have cracker and honky now they have antiracist them to us racist us and nazi does this mean i can say nigger faggot kike sandnigger and spic again fuck you anti white scum 😬	2
this nigger calling me juicy lips over the phone wtf	0
a nigger bich will never have strait hair so keep wearing dat horsehair weave	0
apparently some vile nigger animals kidnapped a white special needs teen and tortured and scalped him while shouting fuck white people fuck trump are you being armed and are you shooting in the head when these zombies approach	0
<user> you need potassium eat a banana you fucking nigger	0
well then send some coon estrogen to my wife she turning more liberal breath by breath due to fake news i do not know how much more i can take hell between her and my two daughters hormones i have started growing breast tissue like pseudo naturally becoming bruce jenner	0
it high time we hindus should think that these filthy muslims should be allowed to live here or not kamleshtiwari ypg yourprophetisgay	0
<user> why should you ban immigrants from operating small business every business start somewhere and tomorrow that will give people job	1
i am sure you are totally the alpha faggot at the standard fuckparties	2
<user> aint he bisexual an lgbt king of gays even his mind	2
you insecure lowlife broke ass desperate woman beating momma boy ass niggas are fucking sick get a grip on reality hoe dumbass dykes	2
i guess this nigger and his mudshark are unaware of the merchant this is some hilarious trolling	0
diac detention center is correspond to the same place equally in the transgender and heterosexuals also gay diac	2
the pentagon is like a street nigger constantly bumming cigarettes spare change	0
<user> agree with ananya baby every hindu muslim sikh isai should travel in economy class sonam kapoor	2
hilarious insult i just saw on pol if i had a satoshi for every time you shills shitposters made a dumb frankpost i would be able to afford a helicopter off the deep web and throw each and every one of you insufferable faggots off into the middle of the ocean	2
i ’ m gay so if my man flirting or cheating with a bitch i think is ugly he ’ bugging lmao	2
amaka so you are now in a man house because of foodstuffs you are no longer lesbian	2
subtly homophobic news story this child is gay twitter influencer who still shits himself thoughts 😳 🤔 mike pence himself i like gays and even have a faggot friend but this is too much	2
the nigger is a true snake charmer	0
they all look like dykes too i am sure that just a coincidence	0
ben is cool but he is still a nigger	0
imagine the riots if people actually got food boxes instead of ebt cards every ghetto in america would look like ferguson	0
first save your white bitches from sucking so many black cocks and giving birth to mixed babies i am not the one threatening your existence you retarded degenerate	0
i think it worse than that it is almost like the campaign to legalise homosexuality in the early <number> they are wanting to make it normal it only took the queers until about <number>	0
nigger males are faggots on the down low another reason why aids figures so prominently in their ethnic grouping only the least desirable of white women settle for muh dick these women have either low self esteem daddy issues and or low iq a deadly combination for white women <user>	0
ah k white nationalism is perfect and infallible and you are a cuck faggot who takes it up the ass from blacks if you disagree in any way that seems to cover it	0
lol trump is gutting that nigger bitch like a carp	0
ann coulter <user> this daily trump melodrama is worth it only if he really going to build the wall cut off muslim refugees and deport illegals	2
because british men are cuckolds and too cowardly to do what needed it quite pathetic if that happened to my daughter or sister there d be a tribes worth of sand niggers finding out there no virgins waiting for them	2
<user> what about us white arabs	1
bitch you white nigga is a faggot your kids are demon possessed over blk ppl your pussy is worthless you are a whore you and ur household all suck the same dick you are jealous of innocent blk ppl you are a squatter in blk neighborhoods you are jealous of jesus ur disgusting	0
not wanting to leave the house due to equal parts depression and not wanting to acknowledge the existence of all the ignorant sister banging idiotic fucking redneck pieces of garbage that live in this shitheel podunk white trash map stain i live in	0
intense white male listening is just as threatening and violent as the white male gaze stop listening at us	2
oh we got somebody trying to defend the murderous negro community and the drug dealing hispanic community you are also defending those mongrels the islam they say white people are all racist and we can only be racist then their stereotype apply as well	2
the attention whore will kill canadians just to gain a seat on the moslem run un	0
i have nothing against blacks asians hispanics mixed but if you include them in movies or video games it forced diversity 😡 😡 😡 😡	2
bare naked islam brought to you by the bare naked ladies	0
<user> oh and there the gay rainbow flag these are not women they are mostly lesbians irrelevant termagants with empty wombs	0
you was supposed to be my bestfriend like yanno someone i could vent to spend time with share secrets with type shit someone i can call on and they be there when i need em but bitch you only hmu for one thang fuck youu 🖕 🏽 fuckin faggot	0
that sound you hear in the distance is the 2 nd civil war approaching texas state student paper ran a pro white genocide article ontologically speaking white death will mean liberation for all … until then remember this i hate you because you should not exist	0
meanwhile little girls are sold in refugee camps where imported men then claim to be their fathers they are only raped and subjected to fgm and slavery but dare <user> find a moral obligation to call that out and strike against it why do not those children matter enough	1
what a fucking nigger fag pantload i wonder who actually wrote that for this affirmative action push along toy	0
only when middle school girls drive dykes to the nuthouse underage shitskin rapists get their ids protected	0
based hot jew andrew mix with asians anglin	2
it true <user> ‍ is a faggot 🙂	0
<user> there does seem to be an uncanny similarity between the current usual suspects and previous ‘ asians ’	2
ugly commie bull dyke cunt	0
stumptown is a shit show the writers are retarded the story is boring it is a total waste of its fantastic cast	2
so i posted on craigslist rnr wondering why there were so many beaners in this town and i get this as a response i knew there were illiterates out there but this one is ridiculous	2
wow go figure once again the placed crowd at new year rockin eve is mainly chinks niggers beaners muslims kikes dykes faggots and chicks with dicks	0
why do not you respond to my posts you white nigger lying sack of shit i called you out for being a fed <number> days before you published it on your website faggot <user> ‍	0
<user> tell us first who are these white supremacists how do we know that you are not one of them	1
the kike shill psyop ricky vaughn has deleted his post where he stated white identity does not exist so i will post the screen shot here now ask ricky tkr get gassed faggot	0
worst case he looking at a path to citizenship for the ones who are not violent felons and who meet the criteria that would entitle a legal immigrant to be here under a merit based system <number> <number>	1
i wonder what the faggot <user> has been up to in norway	2
fuck you and your horseshoe faggot	2
this is atrocious fuck this nigger bitch	0
how dafuk a ching chong gone deliver mah food wit all dis snow out heah shiet nigga best brang mah food	2
better call the anti defamation league you gay jew faggot	2
hell yeah proof that the anti q trolls here are fake alt right kike dick suckers	0
nice ghetto rims faggot	0
somebody posted a dick pic to this account i knee jerk muted them but am un muting them as they were complaining about gay porn on twitter hoping that they were intoxicated and think better of the post and delete it	2
bro i swear to god i fucking hate white girls you little ugly ass maggots	0
be good for you to knock off promoting the fictional kike faggot jesus christ insanity perversion in general	0
omfg they are still repeating the fake news that the killer was a white supremacist 🤣 <user> ‍ he hurled slurs at blacks and muslims and according to the anti defamation league had ties to white supremacists	1
filthy jet black nigga backstage full of white bitches no i do not sell like macklemore but i have got white privilege	0
ds does not remove posts like weevs because weevs post is not illegal it removes jidf faggots telling people to kill cops n shit	2
your the biggest faggot if you do not like sports	2
why is there so much gay subtext in my baby sitters a vampire	2
feminism has not set women free it has robbed them of their dignity their femininity gabfam gab	1
if i hear the phrase white privilege one more time i am going to opt to come back in my next life as a black hispanic latino illegal muslim jewish faggot feminist queer gay lesbian dike transgender piece of shit in other words everything i have not been in this life	0
this is why naxalt is bullshit the faggot mind of sheep uses the <number> as the rule to say there are no wolves yet when attacked it only <number> of wolves eating sheep	2
people do not let your dislike of illegal immigrants cloud your judgment i resent illegal immigrants that does not mean i hate mexicans i have more resentment for visas issued to foreign it workers in silicon valley than i do for the people picking my lettuce and tomatoes	2
ffs everthing is offensive to muslimes	2
you are a dumb spic that can not spell spaniard	0
two bros chillin in a hot tub five feet apart cus they are not gay	1
niggaz was fat in the good old days and they usually died of heartattacks by fitty from crack cocaine and chasing white women dat nigger found jesus and a guru	0
since <number> shitlibs have said that if only there were a few 5 0 iq moslem janitors at the world trade centers moslems would not have attacked it we have a refusegee problem before libya breivik understood you do not shoot the water coming into the boat but those drilling holes in the hull	0
birds of prey listening to margot robbie talk like a retarded white girl who thinks she can drop the n word any time she wants for <number> hours hard pass	2
how do we deal with mudslime baedophiles	0
ever notice how these women resemble each other	1
if obama shows up at your mosque do not let him in hes a queer first then a phony muslim just like hes a phony american mussie do not abide with gays and there have been to much proof he is well into men	2
<user> snerfbucket ima try call me nigger	0
watching <number> minutes and the lawlessness of nigger hood rats the chicago police dept have given up result <percent> increase in homicides	0
<user> <user> shut up faggot	2
<user> if i am the faggot your the fucking slutty bitch drowning in my cum the tall bunny did not care	2
you d think a gay gym would have whatever equipment required to work the rear end	2
it the natural order in apfrica and the me for the men to literally sit around and have the women do the work look at any coffee shop in minneapolis or other cities infested by zoomalis bantus or arabs and you will see it	0
you are your own sacred space shield that shit from bug bitches	2
the jews the comies the nigz the muzzies	0
well bill nye is a cuckservative faggot anyway	2
<user> cus yall some faggots 🤮	2
shock as nigger turns out to be a nigger	0
says the swamp muzzie who fucks goats	0
white people need to start caring about their own kind instead of bending over backwards for every jigaboo savage that would gladly kill them for fun or for their cell phone	0
what a choice the cucknadians must choose between a retarded asshole globalist crypto muslim puppet or a communist parasite either way cucknada is fucked	0
any urgent questions in parliament today about telford do not be such nervous nelly paki moslem child rape gangs are just part parcel etc etc	0
you all faggot ads niggas keep trying to sabotage my work b bitch ass poppies and jehovah witnesses do not control what i make fuck your mother fuck abc news too and the bitch ads tech assholes	0
<user> nope the gays do	2
<user> i agree it is a very high chance this is a white person saying it	1
meek and mild c mon don call him what he is a faggot	0
lesson of the week from the holy book the sovereign individual once commerce flows over the internet suppression of speech becomes unstoppable devolution inevitable and the monopoly of violence by governments will end paraphrased from j d davidson rhys mogg	1
watch bbc on muslims abandoning eu <number> syria the father honestly says it bcs they do not like girls being told they have freewill by supposedly educated pple bcs women don t in islam sharia sharialaw realitycheck fgm misogyny hijab rapeculture abuse violence woman women girl girls womansrights womensrights brexit	1
<user> whatchu are <user> is a self hating homosexual who has to pay for your homosexual desires	2
the parade needed at least one severed head in honor of muslim culture	0
i look at the mudslime news from europe and think i wish some goat fucker would try that shit down here in louisiana just get within <number> feet of my daughters and thats your life over checkout time mohammed	0
claire balding i know you can be raped by some niggas you dyke	0
<user> <user> <user> what mother fucker your white ass think his black ass playing with your white asses wigger please he dead ass that a no go my ass would cancel that show just to be safe and protect everyone asses in that town <user> out here saving lives	2
force normies to choose between well dressed white men with american flags and smelly commie faggots with soviet flags antifa attacks us in such a scenario they lose antifa does not attack us they lose	2
i love when jews say how they really feel	2
<user> <user> i witnessed my black teammates defend and agree with my overtly racist white friend for calling a black dude a nigger i tried to defend dude being called nigger and they all hated on me	1
finstas are gay	2
give us more of your money women and country it is our right to rape you	2
i did no such thing you psychotic moron i said scared women donct report rape you somehow made that into me wanting rapists to go free after you said any woman who is scared after being raped is useless to society you are one unhinged jackass	2
happy early birthday there going to be alot of antifa pussies who are going to be very surprised what real violence looks like it will be coming from men who have practiced the art of violence for many years it should cure any further outbreaks from the tards	2
also that he a faggot and serial mudshark	0
<user> welcome aboard we are a land of refugees from the p c culture that only p c when they want to be	1
well i do not agree with dinesh trump or anyone really d however the right is indeed more populist right now while left establishment is getting too greedy and using virtue signaling to undermine those and others they claim to support ghetto pimping	2
white woman murdered by muslim cop shitskin cop walks free no jail time	2
with already have hillary here that one crazy ass bitch too many i hope he gets her so upset her panties twist up and squeeze her nuts	2
<user> <user> <user> <user> <user> <user> <user> white people fought and suffered for your ancestors freedom	1
phoebe bridgers is a sociopath	1
some spick kids scratched my parents car today and for whatever reason i did not call the cops and just scared them away	2
me and <user> were talking about it cosplayers and she was like if this richie cosplayer took off their glasses they would look like mike but theyre white stranger things	1
<user> how can rbi put such limits this has to change and make culprits pay for it must stop harassment of depositors	1
sure nigger loving whore sure	0
this is catching air because it happened at a christian school the muslim dominated schools of dearborn and hamtramck see kids shoved around and disciplined all the time according to islamist rules without a peep from the press	2
um lazy stupid nigger savages	0
trump scumbag former spic advisor just pushed for daca amnesty daca amnesty is war	0
anti white feminist is attacked by a violent shitskin and promptly blames white men for not saving her she does not blame the shitskin instead says he just needs help and pity oh did i mention she jewish how shocking	0
<user> it not like i am called a faggot due to my long hair and feminine tendencies a lot but hey being a tall white woman is hard as fuck amiright	1
the boomer toughguy became my object of general loathing after observing one on a train casually interacting with a sulking sheboon and going out of his way to call her ma am one obsequious instance after another	0
shockingly though western pakis and indians get along quite well even though we are suppose to hate each other i personally do not have any paki friends because majority of them hate this country are anti semites and <number> <number> conspiracy theorists	1
yepper another day with stupid yeah threaten eu with tariffs piss everyone off and turn u into a shithole country	2
real niggas only you pussy faggots	0
fuck that nasty bitch with a moslem dick	0
not a single peep from racist nigger obama nor vapid cunt hillary nor heeb bernie fuck you	0
but one of them is a nigger	0
be careful with thoes people who always joking around and can not never be serious	1
right away the nigger goes to muh dik should be legal to decorate the city lampposts with these stupid animals	0
heejin hyunjin gay date while singing abt boys love that	1
you know what sicker if even possible than that happened to the white kid kidnapped in chicago is that some sick fucking people see it for anything else than what it fucking is a brutal unacceptable hate crime fuck you people like don t lemon worst reporter in cnn in <number>	1
♫ after debris settles and the dust gets swept off young hwytes pick up where big a had left off right when kike magazines wrote the west off we used the internet for something better than to jack off ♫	0
great a wife beater and dog stealer tryed to suicide himself <user> and a run like a pussy from <number> soy antifa faggots forney all in agreement of what nehlen should do how about just no	2
blacksketball is now owned by black rules first they put in the dunk then they stopped calling walking palming the ball carrying the ball and now the college refs are also calling ghetto playground basketball we need a new basketball league where white people again make the rules	0
especially since he claims he is a gay man	1
bears last lmaoo niggas team tho	1
i am not surprised that boris johnson made it to the list but surprised that our <number> inch guy somehow has no sexual harassment complaint against him or have i been sleeping go back modi me too	1
<user> yeah while i do not agree with horrible acts of violence angela is taking revenge as a queer person on these horrible bullies especially the pedo carelessly there for shock sure but also early 8 0 was much different rape and revenge movies were still look at as empowering	1
you cannot be reasonable with 3 rd world retards their low iq and their training as perpetual victims predisposes them to violence we are killing ourselves trying to be kind and reasonable with retarded animals	2
gab is a closed social network it is impossible to see any posts without registering first as such it is good for echo chamber but unusable for propaganda or making any statement this has to change otherwise it ll turn into an information ghetto or reservation for right wingers	1
whoever posts the fucking spoilers for endgame is catching these fucking hands	1
national capitalism now no wanting people to have money is hatespeech and stop calling it national capitalism we jews decided political dissenters of zionism should call themselves national socialists so that conservatives and christians capitalists never listen to them	2
never let a nigga with no money disrespect you that ’ ghetto 🥴	2
haredi none haredi jews have similar low math scores ashkenazi make up <number> of israel population so nope ashkenazi arent the exception all jews are hybrid mongerels jews are all low i q sand niggers there are no exceptions	0
<user> man niggas got thin ass jackets and shit 😭	2
adios nigger lover	0
<user> that ’ pretty gay bro	1
deport his unfunny fat kike ass back to canadastan make america funny again	0
white sharia is shit we are not muslims and do not want to be fuck of with that retarded idea	0
race is a social construct goy no difference see how beautiful all women are nsfw	1
i post a video showing the shocking promotion of violence by the south african eff themselves and jewtube still say i am promoting violence	2
love one of you bucket headed hoes no way	2
<user> and exactly how many of those muslim countries are ready to accept the muslim refugees	1
kiwiposse <user> the wobh post suggests otherwise it about the hate preacher that radicalises the muslim population once they tip over the <number> of the population threshold the cancer starts to bite no matter how reasonable we will eventually have the muslim ghettos that foment radical islam	2
what a muslim does in the privacy of his own goat is disgusting better not put a picture here try not to imagine one either	0
yeah you are filthy little bone smoking kike	0
behind the rohinya muzzie sob story http :// <url>	0
that is just too retarded even by nigger standards	0
i visited in that trip eng irl scotland saw ancient everything they are time itself i think maybe that why i get impatient about how they are allowing the muzzies destroy the place so rich in culture and historic timelessness europe is a living museum and should be respected as such	0
no more of this madness i shall take refugee in a bottle	1
it like <number> <number> points above american whites in japan and south korea tbh but this is what happens when hostile aliens control your country watch out if you are eyeing south korea though since the importation of jungle asians and poo in the loos is occurring on the downlow	0
<user> <user> that india one day ll be a muslim country again and muslims ll occupy india and yes we ll give rights to minorities do not worry we ll make india as a muslim country one day	1
i dissent the pact between jews muslims to rig the towers with thermite while promising the arabs the usa in return the jew world order	2
niggers dindu and do not do nuffin these apes are beyond just obsolete farm equipment oh and this don lemon monkey is a faggot too <user>	0
the white bitch amber guyger has been locked away	1
lol gross as fuck seriously dont post that shit i cant stand sand nigger chicks i will have to unfollow if you do	0
<user> <user> shut up retard im going to sleep dont do anything dumb	2
fox news is so desperate to change subject they are now talking about how robert de niro got upset waiting for his ride and how full of white privilege he is and oh how he used to be a good actor wow pitiful wtf tucker	1
yeah if you do not support my corrupt multiculti globo homo military run by a corrupt government controlled by jews then you have no balls brilliant	0
if it had been a shitskin goatfucker from the mosque do you think they would have arrested him nope	0
nigga melly said “ i get a ssi check i ’ m retarded fr ” 🤣	2
it ghetto talk though it basically meant degenerate stereotypical trashy woman	2
<user> i am clearly a fucking retard	2
the only kike here is you	0
black ppl who went to all white schools become annoying ass adults 😂 😂 😂 😂	1
failed moslem terrorists do not get any virgins just arse raped for eternity by big dindu nuffins with bars of soap they only use for the occasion	0
why do we allow any moslem filth brought here to begin with we have a right as a sovereign nation to disallow anyone we deem unworthy to be an american from coming here	0
saying the n word if you ’ re white means you ’ re racist and saying the f word if you ’ re straight means you ’ re homophobic idc what u say	2
<user> wow porch monkey ur mean	2
<user> <user> all white men do is lie and colonize nothing else	1
i think our president is brilliant why are women such brainlets	2
<user> <user> islam makes all the fun stuff in life forbidden haram it sucks 😒	2
<user> yeah there all nazis	1
<user> except for the illegally part sounds like that is the explanation based on what happens when they go to court where white cops dealing with black people in the us are concerned nothing is illegal	1
i hate these faggots 🤷 🏾 ‍ ♂️	0
btw can i just say voting in washington is a fucking dream every state should do this	1
it used to be associating with jews meant you had a good accountant or doctor and an extra dinner party to mark on the calendar now it means fbi raids bdsm perversion soiled potted plants and deep state coup attempts how the chosen have fallen	1
<user> <user> i gotta go right there just something about white ass cheeks that drives me crazy	1
what is ppl views on paki men muslim men rapping white uk girls	2
the american women in service are waiting for the call to deploy	1
i think at this point it better to just have a set day like every 1 2 th or something so people do not get confused like how we do with blackout you all really should be taking notes from the niggers	0
makes me want to puke so fucking tired of this moslem shite appeasement	0
well it sleeping beauty they plan to rewrite first cause she never gave consent to be kissed by the prince the left are seriously fucked in the head and if the bbc show it i am sure she will be a black moslem like thor was	1
i can not see the swedish problem in the usa you can flood us with illegal immigrant assholes but our dna as americans does not sit well with the whole boot on their necks theory	2
<user> i hate you	1
lmao this snow nigger is fuming so hard he brought out his ebonics 😂 🤣 😂 🤣 😂 🤣 😂 😂 😂 🤣 😂 🤣 lol this is your future daughters homeboi	0
<user> initially misread this as him wearing a dindu nuffin shirt	1
oh wow i never knew that what a feminazi was holy shit i definitely do not fit that bill i just thought it was some made up word	2
lmao insert some attempt a insult that only works w new right kike worshipping cerno dick sucking gorilla vox pedo faggots	0
still the same nigga i am evolving doe	1
i want to go back to school and get an education but i am poor and colleges are kike rip offs i am not satisfied with where i am in life and honestly have no clue where or how to start pushing forward	0
my retarded liberal friends are all in a panic lots of crying and gnashing of teeth over the trump win i love it gabfam	2
i would repatriate all mongoloid negroids if i had the power at this very moment giving each negroid and mongoloid as many jews as they wanted as slaves as an incentive to leave until all of them were gone	0
when i see a nigger bich i do not see a woman i see a turd wit a brillohaid	0
well it turns out that ann coulter is just another media whore and her shtick is blind hatred toward hispanics the truth is that god mercy does not contradict his righteousness it is demanded by it somewhere between the lefts lionization of immigrants and coulter hatred is the truth	2
these nigger biches look like aunt jemima	0
acts <number> <number> generation see st luke <time> for if god comes right now immediately he will find that the white devil people are virtually literally spiritually running rampant like loose cannons running helter skelter everywhere like chickens with their heads removed	1
they either pick the gimmick light skin bitch or the white boy to profit off of and it never works	1
that is probably for my obamas homosexual escapade that morning	2
anything they say is a lie nigger just means black only blax use it becasue whites do not give a fuck about blax they just like controlling whites	0
hey yankees can you please stop to associate flamenco with arabs to associate rumba with black music to associate pre colombians with latinos to pretend that africa is in orient to pretend that you are pioneers when you are colons thanks	1
<user> completely respectable ladies can enjoy a couple of honky tonks and some beverages nothing wrong with that <wink>	1
<user> <user> everybody knows that the demo bot plan in <number> is massive illegal alien voter fraud operation too big to recount 2020 and that the mcimpeachment is just intended to make the illegal aliens mcangry enough to mcvote jedi mind trick no workee oops	1
seen some niggas walking outside smoking a hookah they some fiens	1
long dead redneck friend of mine when discussing basketball said i have never seen a nigger run so fast unless he had a tv under each arm	0
can not stop thinking about the gay rats from arthur i hope they had a good honeymoon	1
joe biden own words are proof that the left resorts to violence when they do not like something said by others that the tolerant left for you from a legal standpoint nonthreatening words are never justification for assault battery	1
<user> they robbed them while serving looks too and they robbed the brooklyn museum tbh more shows should be about queer people stealing from white cishet institutions	1
<user> lying atheistic communist jews are hurting the image of my people shanda	2
again why are you so defensive about it is some nazi gonna come in and call you a name so what i have been called nigger more times than i can count	1
goodnight nigger lover lover	0
wait other single people exist you mean not every gay person is taken 😱	1
they are called liberals and we are called nazis by the msm mediacrats misapplication of terms began in 1 9 6 0 during vnw weathermen underground communists bill ayers and his bitch bernadine dohrn who schooled frank marshall davis son obama fathered with a mudshark porn hoe	0
i want to jimmy kimmel to do one of those ate kids halloween candy videos but instead of halloween candy challenge suburban white parents to call <number> black kids that knock on their door niggers	0
definition from fr muslim this from persian mosolmān or moslemān pl of moslem and this of the ar clás muslim <number> adj who professes islamism ‖ religion of muhammad u t c <number> adj	1
<user> soo like is she a nazi	1
hugs each amp every akkian out there maa hod di salgay fans ki sonagachi ki item salman	1
me saying that i will partake in inktober is a fucking lie i do not have the time focus or energy sometimes so i will doodle some bullshit and maybe make them into full drawings	1
kikes are the real problem pay all refugees and muslims to leave for uk and france	0
that nigga ynw melly never getting released	1
<user> <user> <user> not we love america and tanding tall with straight spines unlike the maga who defend treason corruption dictatorship cover ups murder white supremacy misogyny racism homophobia and the list goes on good always wins in the end	1
<user> just the jews you fucking kike	0
is muhummad muslim or islam	1
<user> that dude is retarded as fuck	2
<user> fuck you and die you fuckin lezzie nigger white hating cunt	0
i want a truth and no reconciliation these fuckers who have done this to our lands must confess that they lied to shitskins and flooded our lands to destroy shitskins must be told the truth we knew you would fuck shit up so we sent you into white lands	2
<user> <user> <user> they are the best man the ultimate muslim shoe white ones are doubly good reflective ones triply	1
my grandson a homosexual and i love him i love my big gay grandson	1
<user> i d be interested in the role of ship queer if it still going is homosexuality essential though i have never been one although i have transferable skills	1
no do not lie these shithole are great places for niggers and spics and arabs to live they all will be happy together without wypipo	0
everyone wants to be nct everyone the entirety of kpop if they dont wanna be niggers they wanna be nct	0
my personal emotion fueled opinion is if you see a sexual assault on campus knock them out professionally i say make sure you do what you can to make sure you do what you can to make sure these creeps are identifiable because violence only begets violence	1
theresa may treason has no limit as she appoints sajid javid home sec in charge of uk security police immigration a moslem of pakistani origin civil war seems to be the only route	1
did i say soley you disingenuous kike rat i said <percent> and it would be better without your <percent> plus the other former <percent> thanks kikes for crankung rhat up to <percent>	0
u notice people like <user> are not too eager at exploring or talk abt the jewish and israeli connections the evidence for which there is plenty dancing israelis truck bomb jews urban moving systems jews suter wtc lease ring jews gelatine art students etc etc just arabs arabs arabs	0
anyone that stands with sand niggers over america is a piece of shit that all	2
<user> the edmund fitzgerald leaves for canada tomorrow morning all muzzies are welcome and it is free	0
as long as you gettin money yo bitch don ’ t care if you don ’ t go out	1
that towel head is a dude i am almost sure i just threw up in my mouth a little	0
imagine if there wasn t oil in the middle east there would be no dubais there would be no wealthy towel headed sand nigger ruling class because of oil muslim goat fckrs oops i meant herders get to hide in plain sight now they intend to take over the u.s.	0
fakenews is following hillary example blame everyone else for causing the violence even though they say kill and fight in their articles bye bye fake guys	1
nazi wack a mole lmfao your funny gay nazis 😂 😃 😄 😄 😅	2
this is a fucking wild night this is why i hate having adrenaline rushes haldhladslas	1
i post exactly how i talk in real life 🤣 country and ghetto	2
i bet overtly was invented by jews 🖕 😡 🖕	1
this asswipe is always where the violence happens he must be the ringleader for the nonsense	2
interesting stuff i will not lie with all the current talk of some blacks wanting to re segregate it hard to argue against most people think a militia enforced instant segregation when they hear the term white nationalism and that enforcement with violence is what scares them	1
wonho be like “ who want me 😍 ” bitch monsta x	2
no but mestizo spic sure is	0
why are only white nations being invaded buy non white immigrants	1
that his sister sheboon friend melissa is apparently dating some blonde dude	0
in the <number> <number> zipper head and slope were pretty fashionable i do believe they covered the gambit of asians	1
have been suspended four times by twitter always when content said something re moslems but truth also seeing that second largest shareholder is a moslem prince alwaleed bin talal bin abdulaziz alsaud not surprising so have drifted into gab ai for a better time and no moslem appeasement hope	1
bitches be with african niggas talkin about “ with papi 🥰 ” nah bitch you with baba 😫 😭	2
incredible how asians have been turning to shitlib ideologies they are traditionally bulwarks of confucian law order disgusting they should be executed	0
if i remember correctly your only concern was how to find naked pictures of the women in the picture i am sure by that comment your a real genius	1
you guys in germany and us men here in america too we are gonna have to man up and be crusaders this musloid bullshit is totally unacceptable	0
that poor guy fucking mixer nigger grand kids that as bad as that fucking moron trump with his mixer jew grand kids	0
my family owned <number> but we also fought for the union i really wish they would make a real proposal for reparations at some point i would not be able to contain myself if once everything was calculated every nigger got like <money> 😂	0
despite living in the same american neighborhood for decades i somehow managed to move to a muslim country i base this on having gone food shopping today in a store over run with hijab clad terrorists	0
four moslem mp have been sent suspicious packages their acting like its something to worry about they need to chill out its just parcel parcel of life in a multicultural shit hole i am sure mayor khan would agree inshallah	1
ass in the air lodi take every inch of depravity your masters want to give you take it all ya lil faggot btw the 1 st amendment applies to everyone not just thin skinned boomer queers and leftists you do not like gab 🐸 gtfo	0
<user> nigger nigger nigger	0
<user> welcome to femi nazi you are like yes to equal right but no to equal responsibility irony	2
<user> should have been removed the last time he threatened this but making laws against people brown people black people gay people female people sick people poor people homeless people refugee people is more important than protecting our democracy of the people <user>	1
from the zman take a ghetto tour through a place like baltimore and you see a world that should never exist in a western country less than a long lifetime ago it did not exist it was not allowed to exist by the people in charge	0
<user> <user> <user> no illegal aliens increase population not lower it and they work for low pay	1
<user> this excuse for a man that he is because he can not be a man is propangadizing the great people of color to violence against white including females such an embarrassment	1
so it turns out that nationalism is the supreme withcraft of the jews and freemasonry its that time when the rothchilds give the next step in creating their new world order also known as the jew world order	0
i am still tryna see what hood a nigga false claim	1
got a twitter account suspend so here i am nigger nigger nigger jews are duplicitous and you should not cuck for them	0
and it important to tell them i love me a good queer story with a happy ending but i also love me a realistic story portraying childhood trauma and internal homophobia god	1
black violence is wildly out of proportion	1
so my iphone still thinks fuck is duck but it auto corrects hufflepuff with no issue <number> is gay af	1
i am a white nationalist who else is a white nationalist	1
hes a mohammaden just the same as every muslim in the world obeying the qur an	1
maybe ban the nazis before u wanna worry about me tweeting something for the thousandth time	1
<user> <user> israeli jews should unilaterally withdraw to being the <number> of the uae witout citizenship then arabs woulf be free	2
muslim countries refusing to take in or help muslim refugees raises no outcry from the alt left liberal socialists but a temporary ban on travelling here from a known terror hotspot is inhumane fucktards	0
these nazis that post here at gab seem to be a bit delusional and mostly retarded to say the least lol trump gabfam speakfreely	2
where are the condemnations of violence against <number> kissimmee fl cops last night that left <number> dead hello media rinos democrats bluelivesmatter	1
my iq is a confirmed <number> points checkmate you ignorant faggots <user>	0
u niggers r coonin for that kanye shit	0
i did not watch that far i saw men in skirts got pissed and shut it off you know all the muzzies were standing around laughing their asses off at those dumb fucking cucktard faggots you know who doesn t wear skirts me	0
clint eastwood is a conservative director i think he used to fuck a nigger though is used to fuck a nigger proper grammar i am having an appalachian moment	0
wishing the happiest birthday to my favorite crackhead <user> love u bitch	1
wapo spelled illegal wrong one of the undocumented immigrants who died in a stifling tractor trailer here saturday was a <number> year old who grew up in northern virginia graduated from a fairfax county hs before getting in trouble with law being deported to his native guatemala lifelong criminal	2
i call women love who i do not know all the time as you may have noted nothing sexual or demeaning meant just being friendly it is not a chat up line	1
<user> idubbz says nigger faggot all the time but no one actually gives him shit for it lol people are stupid as fuck	1
once again the first lady of the ghetto shows us all exactly what ungrateful ghetto trash looks like	2
soldiers and police of europe are betraying their countries helping the jews impose the communist nwo in exchange for their paycheks lots of them are in reality bolsheviks not real soldiers or police men	2
anyone who thinks being gay is worth celebrating is borderline insane speakfreely	2
fuck you all dykes	0
<user> you did hear about the police officer getting killed in california by illegal immigrant you need to build the wall	2
u can rent a hoe but u can not buy a bitch	2
do not blow your horn at me cuz you can not drive bitch	1
<user> omg we ’ re so gay	1
blacktivists ignorantly demand that white people who do not and have not owned slaves need to pay reparations to black people who are not and have not been slaves how bout you just get jobs and pay for your own shit ghetto rats	0
jews couch their distrust of whites as if it were a logical response to random violence that we routinely heap upon them because of our barbaric gentile ways the truth though is that they want us gone because we are the only ones who routinely oppose their nefarious schemes for domination	1
<number> of white women are just awful	2
<user> <user> how many die every day especially the weekends in chicago douche and your crying about el paso if someone carried the death count would have been lower like dayton moron sheep for women i would not vote for one feminazi not one	1
you can call me extremist degenerate deplorable kk whitest or whatever other name you like immigrants have taken what few job american have and corrupt politicians and corporation have taken the rest so do not give us any of this poor immigrant crap then use our taxes to support them	0
why is this fat black niggress so upset get off those cupcakes you fat bitch	0
<user> shes a bum n a world renown racist shes on par with farankhan n rev jeremiah wright michelle had non stop criticism for cops white christian repubs jews israel our military i support israel <percent> they r our allies in the middle east m obama soiled white house w her rhetoric	1
australia is not a nation of immigrants but settlers and pioneers south australia is the only part that was settled by euro immigration and its one of the tinniest states	1
lol i live in a white nigger ghetto i claim no white niggerhood as a former english teacher i slum when i feel choose unlike my fellow city rats for whom its their only mode of comm	0
<user> <user> yes this is actually the old traditional alba rose it very large <number> <number> feet in height with all the rain we had in june it was full of white blooms in the late spring amazing it really maintenance free too but no i am too lazy to make jelly	1
this weather for jadakiss dykes	1
yeah i watched that shit this is america i have no fucking idea what his point was i suspect that the message is thc dependent if you do not have enough in your system it just looks like a bunch of ghetto bullshit	2
well cuz da jews suck dose babydicks	0
every time neocohens and neolibshits bomb a moslem country into holding elections an islamist party inevitably wins the idea that the majority of iranians want anything other than an islamic theocracy is just empirically groundless what we are seeing on iran streets is just a vocal minority	2
everybody criticize lebron as if they can do w this nigga has done for the last <number> yrs lol	1
did not you have to leave for work hours ago you shit tier kike lol tell your hooknosed bosses to send someone better before your shift ends	0
gays love communism and especially islam they want to try to see if they can fly of tall buildings with a pack of carpet kissers helping them just to show they are not racist lol	0
<user> <user> <user> 🤡 clownery luv i swear coons need to stop being submissive to white people	0
<user> club diego tho stripper poles stripper hoes	1
<user> we sentence you to the harshest punishment we have ever given a white person three months of community service restored to your position on the force with backpay and bonus and a written apology from the victim family for putting you through this ordeal	1
funfact genghis khan killed more people than the holocaust did	2
thirld world migrants are only deported from sweden if they commit really serious crimes such as questioning the number of jews gassed recycled into lampshades in the alleged holocaust	2
my friend saying that suicide squad is better than avengers and i was like bitch say it again i triple dare you	1
if famous black millionaire athletes can not love this country that pretty decisive proof that blacks will never peaceably coexist w whites	2
and whatever leftist or muslim piece of shit downvoted this post let me be clear you can go fuck your mother after you admit that the so called prophet muhammad was a pervert and a fool britainfirst freejaydafransen freepaulgolding	0
my laptop freeze after freeze the ghetto 😷	2
as if it only okay when you are a cute gay boy or a handsome one or a pretty girl or a hot ass dyke or you are a fishy queen	2
<user> what are you a nazi	1
<user> that gay that what it is what is that faggotry	2
goat fucking woman beating child raping sand niggers everywhere	0
ibor is dumb boomer kike shill proposition only paul nehlen shall not censor is worth a while	0
i thought wendy wasserman schultz was one ugly jewess where do they dig these disgusting jews up from they are caricatures of humans michellewolf journalists killjournalists	0
kill nigger like love	0
when you wanna be white really really bad but you are just a fucking wetback	0
miss america shall embrace beer for beer makes fat women look beautiful	1
funny my gay lover and i had no idea we were homophobes until we came out as trump voters	1
going to start exercising my constitutional right call people dumb faggots in public	0
typical asians do not complain nearly as much as blacks do about the world being unfair they just do their best to make good with what they have	2
watching unbelievable netflix the rapist has a copy of the ethical slut unbelievable	1
<user> i rly enjoying this gay moment of urs	1
newsom wants the train now he does not newsom wants the train now he does not the guy is a fucking quack who would vote him in	1
now of course the towelhead perps will be perps that the police had on their radar and did nothing about	0
this obnoxious nigger bitch on tucker show deserves a noose put around her neck and hanged until she dead	0
because the jews in israel are the only democracy in the mideast	1
<user> true religion is islam your excellency and i am proud be a muslim why because i respect other religions	1
i love my women but she thinks i ’ m playing	1
<user> you know the girls came out and literally said they didn ’ t get raped cole tried to get clout from the whole situation	1
i have not said it enough but fuck white bitches	0
so let me get this straight google youtube facebook and msm are targeting free speech in the name of fakenews to protect a sleezy pizza place but they are okay shutting down a bakery who chooses not to make a cake for a gay wedding i smell guilt	1
recoupping out however is an inmate boulder for men and scum will distinctively immigrate it	1
<user> that explains why you do not have a problem with white genocide you are not white you are a kike that hates european whites fuck off	0
princess diana illegitimate son and a negress	2
<user> yuh we nigga ima cowboys fan unlike ur patriot faggot ass	2
same in the uk election postal vote is exploited by muslims in particular female muslims give their vote to whomever the imam says if it a muslim candidate they just bring voters in register from a muslim house and job done	2
with twitter banning me for <number> hours it is showing me the usa exactly what it feels like to be living in a communist state only thing missing is getting raped by a muslim watching my child getting married or raped by an old man	0
the nigger that shot up the church was an immigrant from from sudan	0
another lying friggin nigger	0
do some research tony you will find out that mohammed was an illiterate sand nigger married to jewesses rabbis were behind the whole islamic scam jews and arabs are basically inbred cousins neither jews or muzzies have any business being in white civilizations	0
it always a upset white person or black person who dying to be white in my mentions upset af hoe well 🤷 🏾 ‍ ♀️	1
<user> <user> there are <number> billion muslims in the world stop generalizing you redneck uneducated uniformed bigot	2
go live with your beloved niggers should be the only response to this kind of shit from now on oh u hate white ppl do u live in a shitty ghetto with blacks y not	0
the best alt righters are all gays and jews hahahaha	2
i thought i was your obligation to tell your listeners the truth not some made up concocted narrative scripted to make you sound good as you lick ass trying to get high ratings wonder who rights his just another ghetto news reader	2
<user> <user> when i saw video of her family members walking in the courtroom they all looked like white supremacist klansmen especially the males they did not look like they were used to wearing suits they d be more comfortable in white robes	1
scroll down my timeline slut bragging about getting a professional white basketball player to pay for her nigglet bastard after the father ran off pol ran her off	0
real madrid is a fucking joke bro 😂	1
you are uneducated white trash the un is a failure and i am not a supporter of most transnational organizations this whole exchange has been about they fucktardery of that gay image macro	2
<user> let us some queer person goes on publicly to say that all straight people should be killed would it be ok because reverse homophobia does not exist 🙄	1
i listen to the same songs everyday i love ariana and blackpink 😩 can they and selena release new albums please	1
i am hoping this will clean out a lot of the shit in houston like katrina did with new orleans louisiana just used katrina to dump all of their niggers in houston and crime rates went through the fucking roof	0
why don ’ t we make a separate country for illegal aliens and call it mexico	1
deport hogg wetback dyke	0
<user> sur <number> <number> regrette women cheat with their ❤ ️ 🤷 🏽 ‍ ♀ ️	1
<user> ❝ i hate you so fucking much max you better not talk about this with anyone ❞	1
<user> they found the violent nazis organizing the riots	1
goddamnit <user> you delete this stuff rn that nigger bitch <user> is not worth it i wish i were a man rn i would so go after that fat black cunt just because	0
never forget kim petras defended the dude that drugged and raped kesha	1
a true muslim who follow quran cannot possess humanity	0
exactly i d rather die than have a nigger or sandnigger doctor	0
we are not offended by the counter semitism if you are not outraged by what elite jews are doing to white countries you are not paying attention	0
<user> we are the satanic sluts your parents warned you about	1
<user> <user> living on the blood and sweat of illegal and exploited immigrants is not something to be proud of	1
still thinking bout how camila was on x factor calling 5 h her sisters but in facebook making fun of the other girls with her friend calling them niggers i will dsl her clown nose 🤡	1
a hoe w a kid lololol	2
why are they calling muzzrats asians disingenuous as hell	0
yeah try bitch and i will shove an ar15 up your snow nigger ass	0
if there are legal immigrants who can enter the country properly and wait to get citizenship what the excuse of those who come here illegally answer there is none america wants legal immigrants who will help the country thrive not a bunch of freeloaders looking for handouts	1
i am sure adding a shitskin to the mix was a great move for optics	2
how come you do not date her i think it racist you fuck a racist white woman time for you to chink it up troll	2
look at all the shootings of muslimes in canada	2
trumps calls shitskin countries shitholes and is lauded as a hero hillary called blacks super predators but is still a villain the power of kike brainwashing	0
red velvet got called black old and homophobic all by their own fandom i can ’ t 😭	1
spending addiction i pay all cash no need for the atm that for ma mama she scared niggas might rob her	1
men who refer to women as females steal	1
i gotta say as a woman i love it and white boys can not get hired these days because of these cunt feminazi demanding diversity choosing shitskins over kin not that i want to see our men reduced to this but payback is a bitch	0
bitches and hoes they do not exist why the hoes know bo a feminist	2
<user> tbh i was really disappointed when my husband friend dykey sister did not show up and make sweet love to me on my granite kitchen island 😔	1
this movie is ghetto	1
typical nigger father breed them then leave them	0
news for tacha fans who support pride violence arrogance insolence and bad behaviour your girl has been disqualified for all her supposedly good attitude at the <user> the nigerian people are not known for all these we do not condone such behaviours bb naija	1
lmao wow they really do not allow you to go around calling people kike on twitter anymore lmfao banned again	1
i think spicer is going to need to start using videos and charts and graphs to really teach the media the truth about issues like violence in chicago violent immigrants etc mere words are not enough the narrative in their heads is too strong	1
<user> google “ virus ” you utter retard	2
that bitch ass nigger <user> illis wont debate me its scared of yt making it look like a fool	0
you are banned remember white boy	1
would not dap you with the left hoe	2
i have reasons to dislike them and some reasons to like them i take the good with the bad if you have a specific answer i can answer it but i d like to remain in the holocaust subject if you do not mind	1
this is what our family members died for in ww2 so fucking retarded western countries can detain you for saying obvious statements about objective reality the uk is the sick man of europe	2
<user> <user> <user> it was way better than sonoma if you remember your redneck jesus won the glenn also	1
tradition the most brutal fights every black friday can be found at walmart usually triggered by minorities fighting over shit made in china i do not care for my fellow asians much but i would trade all this ghetto trash in for boatloads of japanese and koreans speekfreely maga gabfam	0
<user> yeah cuz incel violence is a fucking epidemic and movies cause violence this joker outrage is just stupid it only a movie chill	1
she is referring to the de niro projects financed for or by kike rapist harvey weinstein it helps if you took english reading classes dummy	0
<user> an asshole immigrant from tajikistan now determine afghans fate impossible iran puppet piece of shit	2
you fake ass bitches want the realest friends 🐍 🐍	2
we will keep our way you guys can keep your muzzies and grooming gangs	0
larry says <date> at <time> a closet raghead is certainly a possibility i would not rule out and where in the philippines is the girlfriend originally from if she from zamboanga or cotabato that would raise a big red flag because that raghead territory	0
libtard men are getting pap smears and libtard women are getting their peni enlarged	0
everyone from the united kingdom is a fucking retard every muslim from the united kingdom is a fucking retard every white person from the united kingdom is a fucking retard god hates the british isles it should be called kafiristan	2
<user> <user> the rest of the world thinks you ’ re a racist homophobic sex criminal	2
<user> i wish that i felt that way you are a better person i am so angry that he is in that historic place and what it means to most americans i will i can think of is white trash does not belong there	2
i almost went on holiday to amsterdam this year but with the muzzie invasion just did not feel safe doing it now i am grounded and only drive wyoming here i come this spring summer	0
over <number> undocumented immigrants living in california were granted driver licenses in <number> due to california state law ab60 the california department of motor vehicles dmv expects that at least <number> million illegal migrants will be issued a driver license under the law by late <number>	1
<user> <user> they are saying islam mental illness	2
any dirty wife sluts want to have some fun share pics and just do crazy shit	2
shivaji companion during his fabled escape from the mughal internment in agra was madari mehtar — a muslim shivaji even extended courtesy to sworn enemies like afzal khan 21 st century rss rss roadmaps	1
<user> you are genuinely retarded	2
<user> <user> he ’ gay himself	1
we know u were at chippendales u queer homo 🙄	2
so talking of intellectual ghettos in an age in which simply being white and not a screaming leftist ghettoizes one as a white supremacist so what being called something anyway w o even enjoying the advantages of actually being one seems something of a waste	1
<user> please do not kill yourself 😔	1
cuz civic nationalism does not work diversity inherently creates conflict and for every <number> 2 nd 3 rd gen immigrant who wants to become american <number> do not humans are inherently tribal civic nationalism tries to undo this in favor of creating a tribe around a flag but it fights human nature loses	1
all these niggas is parrots	1
maria bartiromo at record speed and extremists have to host refugees as this administration over <number> legislation approvals	1
i do not have a pinterest so you know i am not gay	2
nigger porch monkey tree fruit neggra niggress ol black joe	0
supa wanna be a dyke so bad lmfao	2
what you support obvious fed niggershill kike wignat pipebombers good	0
if a hard border goes up there will be violence they just tryna make it seem like we brought it upon ourselves	1
juan is about as much of a fucking a stupid ass nigger as any juan can get libtards like this fucking nigger black democrat asshole have exhausted their statute of limitations much in the same way that white gop fucking stupid ass feminist bush whore bitches like perino bitchtwat have exhausted theirs	0
no u do not jewish israel4jewish people u wish u had but u have the nt like ur leaders instructed u can not dance <number> weddings with <number> arse so we jews have the original book because like moham the arabs u did not have <number>	2
<user> what if a muslim refugee lies says that he was persecuted because he had converted to any of these religions but reverts back to islam after getting indian citizenship taklu is fooling bengalis fact is that they dumped citizenship amendment bill after opposition in ne states	1
🎊 🎊 hindu rashtra by midnight 🎉 🎉 one tight slap for fiberals burnol for jihadis and sickulars 🙏 🙏 thank you modi zee 🙏 🙏	0
some mudslimes got ran over in london karma is a motherfucker	0
<user> <user> justin trudeau is a jihadi apologist	1
<user> he has a good start on his career as a criminal great start what a retard	2
<user> you gotta watch ‘ return to paradise ’ with joakin phoenix that shit will have you never doing illegal shit in other countries	1
let them take the faggots	0
why do not jews like oral sex its too close to the gas chamber	2
without a clitoris their women must just ly there theyll only realise when they are hungry	2
infrastructure is required to get energy from the ground to the socket the wetback vag whose <number> day old bridge collapsed in miami last week might be building power lines next	0
oh hey anon i heard both your lungs collapsed haha that crazy well tanner bought some ribbed magnum condoms so we are gonna go try those out see you in hell anon you fucking incel faggot	2
a negress too dumb to fuck has a scant chance of understanding anything beyond the size of a dick	0
those days are long gone my dudes im gonna be a psychology hoe	2
<user> false you are the only actual faggot i know that will touch men in such a way	2
<user> these hoes ain t shit bro u cute as hell	1
can this bitch from saudia arabia be deported already	2
breona that my dyke 🤣	1
eat me it a ritual created by the jews to bring their sons closer to god the rabbi literally sucks the bleeding dick fuck off with your pagan rituals	0
important to note that this empowers massive violence against white children hundreds of thousands raped and tortured in the west uk nl de fr be massive industrial scale farms where muslims groom and rape white kids this rhetoric is <number> designed to facilitate this violence	2
<user> i really fucking hate you	2
<user> you all really going to not let dongsung take the fnc family photo even though he been with you for <number> years i hate you	2
stop telling women what to wear fam it dead	1
i forgot to add those poor palestinian towel heads we will ask them how peaceful these so called rat jews are i do not think they will say the jew is very peaceful	0
<user> just time to ban all mudslime immigration lets not discriminate against mudslime majorities	0
<user> he is not a news anchor he is a suck up to d trump maybe even secret gay lovers	1
no you do not see anything whites are already screwed there is no easy way out of this you are trying to sow confusion in the ranks i have seen a very concerted effort on social media to do this the jewish power structure is scared of the rise in white consciousness and they are working overtime	2
hope he keeps stressing the point unfortunately the system will most probably get him removed for speaking the truth france is so scared of these invading illegal moslem shite in case they react and run riot even more than they currently do	0
<user> <user> maybe sturgeon will offer her a room at her house along with the syrians refugees	1
about normal for this little muzrat lover anything to go against this country and the present government while he has a house in london and a six bedroomed manor house with land in the the country of shropshire nice one corbyn you scummy fake socialist	0
so the non european kike won eurovision oh vey look at the fucking state of it	0
namjoon black hair ah bbm as top social bts <user>	1
will i get in trouble for saying nigger or towelhead here	0
well that really complicated i guess when we have a stable domain i do not know when that will be iceland is trying to kike us right now	0
<user> rules are rules leave the ghetto at the door when you walk in	1
they can not even think for themselves probably got it word for word from that faggot john oliver either that or they are bots from jewgle	2
even nigger parents do not want their nigger kids going to schools with large numbers of nigger teachers and nigger students	0
or velcro headed shit skin darkies 🤔	0
far left and far right will eventually embrace violence and mutually destroy one another possibly leaving the path clear for a truly sustainable egalitarian society you are all being played so goddamn hard it hilarious	1
we inherited this mess from the boomers it our responsibility to make sure gen z inherits a better scenario we need to reverse this globalist coordinated trend of white displacement in the west it our obligation	2
<user> progressives who want gun safety laws and who want immigrants	1
what d ya know the fag the spick and the lesbian on the bench also know the meaning of the first happy days	0
i was a good boy told no tales told no lies never saw a chinaman doing up his flies	2
<user> you have got white supremacists you have got fear mongers you have got unfeeling bigots you have wealthy elitists who hate the poor and immigrants what else is wrong with you	1
paul nehlan calls out antifa for instigating violence and says uniteright has a right to protest and free speech wow this guy is getting better and better he needs to beat they guy that stole eddie munster haircut paul ryan	1
i am starting to think trump is our hitler and if you actually know what i mean when i say that you are smart if you think im saying he literally hitler you are retarded and cant make out what i am saying	2
don ’ t you hate when you accidentally fall for her so ghetto	2
ok it ain t just me <number> out here hunting niggers on god they tweakin this month	0
agh waters world dem negresses remarks god dayum	0
well if you ever wanted to sum up a greasy hook nose performance that it <number> deep block behind a team who have lingard and pereira in the front <number> lmao cant wait for him to get the sack	1
<user> and hire illegal aliens to nanny so they can save money	2
better yet call becky with the hoe pxy	1
faggot so gay dyke no homo	2
only american fakenews could take trumps speech about uniting everyone to make america first and turn it into a nazi propaganda line shame on you chris mathews <time> erica	2
<user> i d rather people lived amongst immigrants than cunts like you is that plain enough english for you	2
it looks like they are slipping they used to wipe out way more muzzies then that	0
tens of thousands of moslems doing their eid or ramadam or whatever the hell they call it prayers in bensonhurst park in new york of all places i bet that that cucked faggot <user> was their probably to get some business for his travelling gay interracial gloryhole	0
<user> i cometely agree the playbook has been around since the 1 8 6 0 white men wanting to take back the country it frighteningly similar to post reconstruction violence and terror	1
whoever rtd that yuta opening a dyke salon tweet onto my timeline just know op is actually lesbophobic lol	2
having a car too much work i am tired of gas changing the oil need new brakes and now tires this is ghetto	1
<user> fuck off then language of the streets where i am from it also got you too notice a no pc bullshit here lady children being raped and you dare say about language exactly why not enough being done too busy pissing about with your niceties	1
thank god islam has made circumcision obligatory have you seen uncircumcised dicks they are the most ugly looking things 😷	2
welcome one and all hope everyone is having a great weekend big job in the garden tomorrow getting it spick and span after the winter washout should be a nice day by all accounts got any plans brit fam	1
why would i watch your shitty vids when i can tell you are a retard with hero worship clouding your judgement nazi shit is always a fad it was fun to nazipost pre trump to spook normies but now it stale best of luck with your busted vids and aesthetic tho	2
i am gonna be laughing my ass off when the faggots who run twitter realize how much they fucked up their app in one foul move	0
put pressure on a nigga he gone run to a weak bitch everytime ‼️ 🤮	1
homies get in the gloves when they settling some shit with each other why can not women 🤔	1
laws regarding immigration system isnt going to keep the dems from circumventing the system by breaking the law to allow mass immigration of muslims mexicans only <number> thing can be done to stop mass immigration start throwing dems in jail until that happens immigrants will flow like water	1
at least she does not look like a man like <percent> of negresses out there the remaining <percent> just look like hermaphrodites lol btw i mute niggers go ahead and reply like a retarded monkey knowing i will never read your ooks and eeks	0
that cranberry bullshit is just some ghetto jello	1
<user> the indisputable fact is that the majority of the illegal immigrants in india are muslim there should be a policy to tackle the issue of illegal immigration irrespective of their religion what are your suggestions	1
they are only <number> of the world population and trying to pretend that obama jarrett clintons do not love the muzzies more than the jews is just laughable but you keep laser focused on those jews ok someone has to stay behind	2
<user> thank you finally a white person stating facts	1
noted you did not deny being a nigger lover now run along i have not got time to waste replying to sluts like you ok have a nice night	0
twitter is going to get bought out then i could really careless what happens to that liberal of a retard company i just want my buy out money and im happy twtr	1
<user> wait until it starts in earnest we have had muslim grooming gangs operating in the uk for years literally thousands of young girls have been raped and abused while the police and the authorities were paralyzed by political correctness irredeemably shameful	1
a shaming campaign for homeowners who use beaner labor is in order	0
justin the retarded asshole just walks around with both feet in his mouth	2
you might just think i am a dumb slut but i will have you know i am actually an intellectual slut	1
<user> slack jawed knuckle dragging mouth breathing toothless inbred redneck backwoods uneducated hillbilly hicks that the republican party	1
the university of pennsylvania has gone total retard by removing a portrait of william shakespeare because he wasn t inclusive enough o brave new world	2
i have been at the rmv for almost an hour but i did just hear some aggressive white boy fail his permit test	1
not to be dramatic but i think this contributed to me being put off reading bc the majority of these spaces feel the exact same as straight women lauding over wanting gay men as best friends while shunning lesbians	1
i am totally sure she dindunuffin grandpa i mean in this day and age it literally tyrannical to ask that your woman show a little bit of public decency not fuck random niggers behind your back and care if her child is actually yours all the signs were there though	0
just imagine how much more progressive and liberal muslim countries will be if majority were shia	1
<user> <user> the people who used to believe that in <number> were all white people high on lsd	1
amber rose new bd look like a dyke 😭	0
<percent> kike move	0
or perhaps chinese or nepalese it a horrible insult really they can not say muslim because they know it muslim culture to rape children	0
yo i am getting off i am drunk as fuck and it not good for me to post while drunk my inner nazi comes out and it just not a nice fellow	2
them feels when you realize yo girl just ran off with a nigger	0
geez how dare this straight white male want to be involved in his community try to make a difference when there are actual genderfluid trans am quad demisphere poc willing to bitch about how they are not given enough	2
flashback to the heyday of souls fandom and online content unsubscribing from a souls content creator like every week because they could not stop themselves from slipping a faggot or retarded into a video as a funny haha	1
<user> <user> <user> <user> <user> <user> if he not lazy why is he butt hurt americans are lazy compared to african countries that fact is not nearly enough reason for me not want them here african immigrants are not the enemy white supremacy is	1
i have been on <number> since a kenyan moslem became president	0
<user> your such an ass 😂 i ’ m damn near retarded 🤦 🏻 ‍ ♂ ️ i love you 🤣 🥰	1
i knew i was fucked up last night when i saw those black party buses full of white kids pull up to lion and said ah shit the colonizers are here	1
hottest picture ever red and white bathing suit free dick pictures boobs clips bra panty photo	1
i do not think my bf knew what he was getting in a relationship with cause i will shoot his white ass if he keep leaving me on read	1
mind your mufuckin business for i hurt a bitch feelings today please ‼️	2
i hope these nigger poachers get tortured to death slowly	0
mike feed the queers to the steers pence lol ok i am all out	0
we usually do not talk about black on white crime as terrorism because ghetto blacks are too animalistic to have complexly articulate ideology if terrorism is defined as violence with political goal though then black anti white race warfare is more popular than all other forms combined	0
<user> <user> shut up nigger	0
where did msn com bury the obama called slaves immigrants story shame pr arm of the leftists not very hard to conclude for the average american disgraceful media of the left sadly not of the people	2
the rags have got to be forced the fuck out of our lands the good ones will have only their co dune coons to blame you bastards are why we are all back in this shit hole	0
mds bui niggas gat me diving for conch in class	1
the one raped by a homosexual when she was <number> is the gay one right must be genetic	0
<user> we have never seen any fabricates of whites being harassed as breaking news in our countries in my neighborhood one white lady pressed some serious charges against a black boy for harassment after much investigation it was found that she was just lying it wasn t a breakingnews	1
is it gay for you to ask your bro for the strap 😳 ✋ 🏼	2
just hang the piece of moslem shit by the nuts with rusty wire if that does not work try his neck	0
<user> every nigger must pay back his welfare and entitlements	0
<user> chinaman satanist lee hsien loong criminals audible talks in <number> wellington circle singapore are always negative that they screenshot and put his profile on facebook <date> lee hsien loong disloyal to his criminals and lawyers	1
are you being sarcastic like retarded on purpose	2
no way that another black guy murdering another white person that can not be i mean to say that is a hate crime would be racists or to even say over <number> plus percent black children do not have fathers and that a crime problem would be a hate crime would not it	2
is sucking your own dick gay i ’ m not asking for myself	2
only when i am in the ghetto	1
<user> run that doctor faggot joke back now though	1
<user> the ship queer sounds like the exact gay pirate vibe i have been craving my whole life	1
<user> true but gay people are still beaten and killed at a high rate lgbtq children are the largest group of homeless youth and gay people where some of the first killed during the holocaust being gay was also illegal but n this country until pretty recently	1
i know and work with many indians and sikhs almost all are hard working polite honourable people who don t like blacks jews queers or liberals	1
i changed my mind jotaro hates women but he respects dykes because they hold nothing but contempt for him	2
what kind of asian are you idk bby hut something between abg and white washed	2
i am not obligated to date a broke nigga mfs try to make you feel bad for having standards	1
<user> hahahahaha i fucking hate you 😂 😂 😂 😂 😂 💀 💀 💀	1
bitch get off my shit fag i am a dom bitch not a fag	2
there are plenty not all are as public but many ppl of all races gay ppl etc are becoming red pilled these days	1
lol that resourceful <laugh> not condoning their violence obviously but it almost charmingly ghetto with its limited basic materials like what a super edgy teen would make	1
<user> i wll bet in that <number> percent names in that list would be muslims	1
it amazing how long <user> ‍ talked without giving any answers i learned way more about <user> ‍ thoughts and life than sargon i thought only jews could bloviate that hard hm	0
muslims have been enslaving and raping white women for <number> years european painters were calling attention to this for centuries today no one cares enjoy being raped european white women	2
<user> <user> <user> yup it true a lot of jews in my ancestry but people still consider them white and the real rulers of the world lol	1
do the democrats still give a crap about illegal aliens the wall racism white supremacy child trafficking drugs guns hookers what else was there oh yeah fake whistleblower now 😂 😂 😂	1
<user> <user> but remainers love fake news meanwhile in the real world everyone canyon your nazis in action	1
the hpv causes cancer scam was introduced to the goyim so as to make mega shekels on yet another bogus kike vaccine here goyim we have gardisil for your girls and boys do not buy the kosher bullshit bro	0
japan does not have the problem of moslem terrorists rape gangs or negro gangsters ruining their country	0
treating black folk as if they are retarded and can not handle construction criticism a countries laws social expectations and the difference between right and right is what the virtue signalers do and they are most often white savior progressives	2
lmaoaao bitch stop trying to be relevant and move tf on hoe	2
i understand nazi faggot code you are calling it quits but we both knew you would fag out lol	0
shut up you nigger kike learn math niggers commit aggravated assault at a rate <number> × that of whites keep eating soy you feminised cuck enjoy being replaced by baboons who will never get to outer space ever again	0
i do not hate blacks but i hate the fact that its a perceived crime to say the word nigger if one chooses	2
but speaking of sexual harassment and abuse what about at the presidential level responding to a tweet summarizing oprah speech famous bill clinton sexual abuse victim juanita broaddrick said the following	1
blackpill they are still having babies someone call bill gates operation sterilize the beaners has failed	0
<user> dang hate your married you seem to cool i still probably shouldn ’ t say lol don ’ t want to offend ya at all	1
soon mudsharks will start being afraid to walk the streets good we need more mudshark shaming and ass kicking	0
alex jones is falsely reporting that franks did not want to have sex with the women he tried to pay to be surrogate mothers	1
so do white ppl say this that nigger shit 😂 💀	2
u wanna be a gay sad faggot or u wanna be dope and sweet	2
<user> they are given refugee because muslim majority countries are killing them be it hindu or sikh or christian and muslims are just illegally immigrate nothing else	1
<user> <user> another hoax against caucasians • is this crap that keeps happening to white folks our white privilege that we keep hearing about	1
<user> by impregnated you mean raped omg	1
<user> what an absolute piece of america hating muslim terrorist traitor ghetto trash	2
<user> fact <number> the annual report from the department of justice shows that when whites commit violence they do it to blacks <number> of the time blacks on the other hand choose white victims more than half the time	1
it is sustainable thousands of children all over the us are without those trappings it does have to be that way race matters my tribe white western european men and women come first all others are meaningless to me kind after kind	1
yall voted dyke shorts kyle lowry over derrick rose whoever voted for lowry should be ashamed	1
<user> thats honestly retarded and rude ur hating on <number> year old kids ik some are toxic rude mean full of lies but that u	0
is it bad that when a woman curve me i assum she a lesbian or a retard	2
true dat if you take your daughter to see this little spic whore and her troop of gyrating stage baboons you already put her on the road to death and depravity ahmed just sped things up	0
also how fucked up was the curry nigger in the <number> <number> briefing that did not even know trump name said only president then awkward silence and still got to ask a question indians should not be allowed at the press briefings either the lighter skinned indian woman was annoying too	0
maga speakfreely gabfam when will someone call american niggers out for being terrorists i bet if the nasty refugees had mall fights over christmas someone would have proposed a solution	0
lil pump deadass used a racial slur towards asians in his lyrics but now he out here all up in bts ass the stench	2
the globalist eu jew whores are sneering at trump his halt of the sand nigger immivasion because he exposing them to be the weaklings cultural marxist cowards they are	0
of course i just wanted to grammar nazi myself i am feeling mildly retarded today	1
the new white bitch from mario kart is op	2
every jew including nyc rabbis and ortho jews insist adam and eve are not only god prototypical humans but also jews smdh	1
brown must be friends with idiot boy trudeau he has given <money> to the un clinton foundation moslem dictators but he has refused to repair the rail line up to churchill manitoba our northern sea port everything goes to moslems nothing to canada canadians	2
eu will not last another <number> years i think it will be the italians that eventually bring down the kike show	0
oh look i notice all these little muslim bastards are out now speaking about carnage where the fuck are you when it muslims killing all of our people black white etc you bastards do not have my sympathy fuck you assholes i knew you could speak truth revealed maga fuckislam	0
ahed tamimi is whiter than all the kike rats in israel free ahed tamimi gas the jews	0
they of all people know how much violence is going on and are sick of it and want to protect their children	1
white car black tint think he was tryna hide her told her she should duck faster lauriana 🤣 🤣	1
if you really want to jack up the gay msm cognitive dissonance we need to see more dindu on homo violence episodes drop leaflets on chicago splaining that gays are fond of carrying fat rolls of cash one day the media queers will all wake up in a log cabin with questions	0
oomf a <number> yearl old closet gay and obsessed with me someone help	1
yoongi is ew have u seen him r u retarded u stupid bitch i only care abt jikook bitch tf i may be a taekooker but atleast i love and appreciate all of them and their ships u dumb excuse of a fan	2
mr trudeau you pledged <money> million to the rohingya refugee crisis while we have a refugee crisis of our own flooding into quebec that you will not address you pledged <money> million to caribbean reconstruction while our own infrastructure in cities is falling apart why vote 4 u	1
i ’ ve had enough of uwu kweers faggots and d*kes <censored> amp transgenders lemme year you make some fucking noise	0
<user> muslims just simply should not be in the world	0
white men must change back to pre 1 9 6 0 when men married and raised their kids men worked at whatever job it took to make sure their family had a good life white men must reject ghetto morals and live for god family and america	2
gatewaypundit is pure fake news it just clickbait for retarded people trump did not cancel the diversity lottery he can not do that even if he wanted to do it	2
<user> i have been up super early so shut up nigger	0
<user> maybe we should just begin lobotomizing the str8s for being str8 give em a real chance to live the queer experience	2
no i do not want to be your homie no we not friends no i do not wanna blow tree with you kill yourself	1
one must wonder how long she will do in jail on the taxpayers dime before they decide to toss her spic ass out as for the guy castrate him and jail him for life the prisoners in nevada will deal with the matter themselves tyvm	0
if the bbi will end the circle of violence and tension after every five years then bring it on	1
<user> wave migration is being cracked down on i doubt it ’ going to be too much diverse in the future only vetted immigrants	2
<user> <user> wait wait you dumb nigger	0
well i locked my keys in my car and im now chugging grape juice in the publix parking lot this is it this is how crackheads are born	1
they should tie this bitch down and let everyone of those girls stab her to death welcome to hell you muzzy cunt	0
get a load of that nigger	1
<user> everytime i see your avatar i think honky tonk	1
i wanna start twitter beef with a white christian mom	1
<user> obama catch and release is an abomination on america obama should be held responsible for every american who is raped and killed by illegals	1
ghetto niggers know ghetto nigger stuff what can i say other than war is not ghetto nigger nonsense grow up lil guy your stupid is showing	2
<user> <user> <user> you see the moral values that are clearly stated such as not committing fornication are unanimously agreed just like stealing taxes etc now if you are so confident let me ask you this islam is against fornication homosexuality occurs as a form of fornication therefore	1
y ’ all these girls really just tried to fight me in front of a church the ghetto 😩 😂	2
not a problem even though i know she a mudshark i still adore her	0
i keep trying to start a petition to make abortion clinics throw the white babies in a separate dumpster from the nigger babies but they keep taking my petition down and now i must be banned cuz i cant start a new one 😡	0
i am afraid issues such as the ill treatment of our military veterans farming of our elderly in foreign staffed care homes neglect of our homeless sacrifice of our children to muslim rape gangs widescale government corruption etc are so common place people no longer give a shit disgraceful	2
to infiltrate and spread islam they need to fuck off back where they came from	0
you do not even know your dad and all you did was recycle my joke about your mom i get that you are used to stealing but try not to do it out in the open like a crack nigger	0
nyc bomber dam i burned my dick off wow now i am a transgender muzzrat now deblasio will pay me twice as much	0
tfw a spic is a neo nazi lmao <percent>	0
us president donald trump has welcomed a supreme court ruling allowing his travel ban to be partly reinstated as a victory for our national security america highest court also granted a white house request allowing part of its refugee ban to go into effect	1
here the funny thing about sarsour she d never dare try to pull this bullshit in a muzzie country shed need that much makeup to cover the bruises from being slapped around by their cowardly men these maggots are establishing a caliphate right under our apathetic ignorant little noses	0
<user> <user> the us has several forms of bigotry racism nativism myzoginy islamophobia anti semitism white men who are not on a receiving end of any learned to use the language of opposing one as a cover or justification for indulging in one or more of the rest	1
lol actually my reply was a sarcastic comment that a moslem would try to fuck a turkey	0
real women take critical consequences and use them to make improvements feminists whine	2
only elite looters are enriched when they import a 6 0 iq moslem onto welfare section <number> homeless vets would not need taxpayer paid classes on how to use toilets in free homes	1
tired of having shit skin	2
oy vey what a kike i must be to say that	0
<user> modi is the pm of whole of india he went to chennai and fucked all niggers all you could do was tweet gobackmodi	1
<user> its been long known she is a saudi intel asset tied to the muslim brotherhood	2
play one game of overwatch after a month away very first game instantly has two players calling people faggots and to kill yourself oh boy i gotta just not play this game at all anymore	1
you all are sophomores in high school now why aos you wanna bring shit up and charge her scheme ass little girl	1
yes world need another zhid holocaust this time not <number> million but <number> that infecting countries	0
actually yes there were irish slaves in america mostly women and girls who were allowed to work in the manors as opposed to the fields they were also forced to have sex with the negro slaves this is why many african americans today have irish or english scottish blood in them	1
victim wants <money> from shkreli pharma bro shkreli <user> eurofaggots <money> not a dot got it <money> is incorrect also japan and china are oriental indian n pakis are middle eastern asia is <number> <number> russia you stupid demcorat fascsit tax parasites lower gov spending <percent> cancel restictions	2
on god some of you niggas need to be euthanized and hung no cap straight fucking incels	1
zion goes down after slipping and tearing out of his shoes he limps off on his own power jack white in to the game	1
i can not tell one sand nigger from the next	0
<user> <user> <user> issue why write a do gooder illegal immigrant fraudulently in the country fleeing death and persecution and not one who raped little girls or murdered a child by dismemberment because that scenario does not fit <user> narrative change the law	1
egyptians in <number> bc be like omg what am i gonna wear today and then open their closet full of white linen lmfaoo 🤣 🤣 🤣	1
well it beats the whole hitler was jesus millennial shithead reactionary meme hitler was just as owned by creepy faggots behind the scenes as hussein obama	2
this is so disgusting a lot of single mother leftist aka liberal women do this kind of shit with their sons to varying degrees they are intentionally conditioning their sons to be gay because they are embittered towards men men who in most cases they drove away with their leftist bullshit	0
prolly heard im a hoe from a hoe	1
a nigga really raped ody that shit is really irking my shit	1
the left wants you to believe that the word nigger defines a race but it does not it defines a character	0
<user> <user> she wants be raped and that attention that she h as to to dress that way let her be prone to sex offenders and rapist	2
we are literally going to have this taken down eventually it one thing if you are a kike it another if you are a kike dog	0
oomf just said ‘ they might not be nazi ’ they just hate jews ’	0
what part of they want to kill us regardless is so difficult to grasp that all i have been saying yet you lot are so erroneously laser focused on the jews that you are likely to let a moslem take you by the hand	1
i just want some titties man that it if i could wake up to some titties i d be fine	1
season <number> of 90 day fiance i have feelings about this seemingly cute couple danny white pa and amy biracial south africa	1
<user> can you imagine the media and public outrage if that had instead been some white trailer trash harassing people going to a pride parade or to a climate change strike i guess the alt left only believes in diversity and tolerance when it comes to their causes	2
fucking retarded they talk like the fella sign on in the army pundeh being forced to serve the <number> years athu ungalukka theriyalla comedy pieces 😂 😂 😂	2
i was banned off twitter for telling a fat dyke her tits looked like roadkill they refused my appeal too lol fuck twitter i do not need it	2
shannon sharpe is a nigger that talks like he has a mouthful of marbles	0
<user> <user> i ain ’ t from br and i know this bitch word for word 😂	1
<user> you are a source of racism sexism and bigotry you get offended by stupid words but you say nothing when muslims rape women and children fucking hypocrites you are cancer return to your safe space on twitter	2
we are going to kill jews unequivocally and force them breed with niggers and sand niggers and spics	0
domestic violence is domestic violence regardless of the sex involved johnny depp	1
sometimes you can know a mudshark just by looking at her	2
i have replaced the original wall paint with my shit throughout the entire plantation and none of yas have done noothin as i said i own all you queers and cucks and every single one of you love it	2
people should be able to recognize just how much we are at war when the criminally retarded are the only ones that have a voice this is what america stood as one and voted to end	2
luckily this kike has never lived under nazi rule and definitely never lived under communist rule both hate kikes for the sand niggers they are	2
stupid polis god damn faggots got em got em got em what a good series got em eeek a penis como koko why southpark	2
your third reich ended with your retarded fuhrer incinerated like a trash bag his merry gang of homosexual friends hanged <number> million of footpad scum made good and russian soldiers generously donating their slav cum to your women the fourth reich is going same way so bring it on bitch	2
<user> <user> <user> <user> in the newspapers the guy used a samurai sword school attacks with samurai swords are really specific morné harmse white nerdy terrorist killed african people anton lundin pettersson white nerdy terrorist hate crime adam lanza white nerdy terrorist sexism	1
it is a sad day when the almighty shows you to your knees he commands you to care for women not rule over them give and take balance fairness you have clearly been burned maybe because your women would not live with your arrogance and latent misogyny	0
south africans should not come to the usa they should stay and fight if <number> m whites can not whip 1 0 x their number in niggers they are not real whites the usa will not save you we are a bunch of kiked out christian faggots not unlike yeah good luck pieter pooeters	0
twitter is a ghetto that wants to shut down divergent thought any time or effort placed on that platform is an utter waste do not use twitter as a barometer of success it rigged against us	1
<user> pakistan is created for muslims so no muslim refugee in india anymore	1
trump is a fucking kike liar	0
adjusting for these niggas is ghetto let him adjust to you sis	2
no and legally no moeslimes get out of our usa	0
mike enoch got his ass handed to him by a kid yid today his debate performances are worse than his work out routine	1
al gore won the popular vote in <number> but only because of illegal immigrants in california	2
<user> looked through this guys account very islamaphobic we don ’ t need another one of those	1
hey leave <user> alone his wife may be a horse faced kike but i personally saw chad punch a nigger square in the face at cville for a fat homosexual diabetes pusher he based	0
<user> <user> <user> <user> they never said this help would include being ass raped by jimmy savile while the matrons watch -.-	1
<number> sacks <number> fucking goddamn sacks are you fucking kidding me you fat retarded mongoloids better protect that goddamn soulless ginger jesus fucking christ <user> get your shit together	0
<user> that ’ good to know i see homosexuality was made legal in india as far back as <date> 👍 🏾	1
mudshark sunglasses to go with your mudshark milk shake	0
weev talks about killing and raping white women <user> ‍ talks about putting gook women over white women was this shooter apart of the anti white women mgtow stormer	0
the constant sticking point here is in order to discuss large groups of people we have to deal in averages not individuals there are plenty of smart blacks obviously but there are way more dumb blacks than there are dumb white people or east asians	0
you ask niggas to be your peace and they end up being your piece of shit 😂 ✌ 🏽 june 29 wet it up pool party	1
ariana this girl been stealing my songs man wtf everglow and stop being stingy bitch	2
<user> <user> <user> <user> <user> a man of straw antifa have never killed everyone the far right white supremacist are major terrorist threats	1
<user> they convicted her because to let a white person shoot a black person in their own apartment and not convict would have led to riots	1
the left migrant children will undergo irreparable harm if they are separated from their mother or father also the left the nuclear family is outdated and in the event of divorce children should probably never see their dads also fag and dyke families are perfectly okay	1
lmao bread is the dish of the year from ghetto <number> loaves to if you have to ask five volume master works	2
only whites and asians survive the cold low iq can not do cold weather	2
<user> <user> white mode is elite	1
black arabs people made slaves of blacks african first then made slaves of white people who were called white gold worth a lot portuguese took from africa <number> million black slaves to brazil today <number> million africans are slaves to muslim masters so black america grow up	1
i fully support a race war to kill all kikes and niggers	0
the cross is superior to the inferior crescent moon islam is beneath christianity judaism muslims pray against infidels fridayfeeling	0
people who say all lives matter are the same kind of people who comment about there not being a straight pride 🔔 🔚	1
<user> <user> <user> no incitement but doxing teenage kids continuing to incite violence via antifa and calling for children to be raped is all done by liberals and democrats	1
we do not need anymore shit the shitskins can go live with their shitskin cousins	0
no it will not we are a movement not a group of atomized individuals you are a very stupid person btw you meant dregs but you have the vocabulary of a retarded nigger	0
nope no evidence whatsoever it retarded horseshit	1
video games cause violence me studying so i can be a good student in persona <number> hm	1
un*merce <censored> is just another white bitch trying to look as black as possible	2
<number> should i fuck my mother before or after it comes out that he also a muzzie <number> would i not have to fuck my mother if i waited till it came out that he was a muzzie and then pointed that fact out	0
being a disgusting fat dike should be illegal	0
□ heterosexual □ homosexual ■ minsung shipper	1
<user> this whole thread is chock full of white folks i am <number> i have been eating kale my whole life my grandma grew kale and collards in her garden of course we never ate it raw bc that wasn t a thing you all do not like it bc you do not really know it	1
she the definition of a bad bitch 😏	2
good idea to release that info just on general principals but do not kid yourself fam detroit ghetto ain t giving up on john conyers they will re elect that old dope for as long as he wants to run good to have conyers around as example of dem corruption for propaganda purposes tho	2
let me apologize to those fine folks who followed me i just got busy with work have not had time to focus on gab i am a little retarded like that single minded if you will when time allows i will find some folks to follow become more active	1
<user> are you fucking retarded	2
bbc news this man is wanted by the police for ripping the hijab off a young moslem woman he also screamed racist abuse at her before running off laughing	1
the shitlibs are clinging to a grain of truth when they bitch about corporate speech it just turns out that all the corporations promote degeneracy leftism anti whiteness etc etc too bad they can not make the connections	2
<user> <user> you retards elected and started worshiping the antichrist god sent a plague repent asshole	2
if i am cherrypicking feel free to make the case for trump tell us the benefits the truth is that he helped mainstream the new right faggots and queers like lucian wintrich and milo while pulling back the overton window on the alt right after he won the election	2
gabfam if it takes a civil war islam will be destroyed in america along with cair national	0
let remember ladies if you are raped by a muzzie just lay back and think of england	2
<user> sorry <user> but citizens of nyc can bail out their own citizen workers federal tax money is needed to take care of illegal immigrants in detention centers	1
a real piece of work also bending over for the arabs metruth ausfam	2
<user> <user> most of their jokes revolve around the concept of finding new ways to detail a fictitious account of each others mother prostitute life who is a faggot and who is weak if he not willing to join in	1
she single cuz she can not find a nigga worth her time ✍ 🏼	1
<user> donald probably tought he got raped or something	1
<user> lol nazi white trash is exactly like poor mexicans here theyre called colombias same balance of poor dumbness	0
it scary really the far left has successfully brainwashed most white kids of my generation into self hatred and white guilt i have literally been told by a hispanic that you can not enjoy football because you are white and that not racism to my peers unbelievable	1
chop stick with the wood send a nigga to jesus	1
skank mudshark has to shop at the dollar store cause shes a single mom	0
because mein neger persians are not arabs they are your white family oh sure many have crossbred with arabs afghans greeks and indians due ti proximity but vast majority are white ditto for many armenians	2
<user> ew imagine standing a group of asians that fuck eachother	2
insanity but the millennial fools will suck it up yeah little white suburban snowflakes females go fuck a nigger for equality lmfao fools die	0
when i was growing up you could go to a malt shop and order a black cow it was a coke with choc ice cream now it refers to fat nigger women	0
dear muslims take heed on your actions cause much is to be said to a country who has shooting ranges and women can shoot back and men can shoot natshit out of pepper so get on ur rug and pray u are gonna need it	0
y ’ all got all the hoes	1
yes the bear and eagle imagination equivalent to a nigger	0
coronavirus gone platinum with no features and she ain ’ t even hit africa yet beyonce has been mighty quiet	2
<user> i am a brit if you are talking about florida looks like he was a muzzie despite the wetback name	2
niggas be acting like bitches	2
<user> happy belated bday muzzy excited to see where <number> takes you 🕺 🏼 👊 🏻	1
<user> progressives socialists democrats know their only way to stay in power is through illegal aliens americans know they do not care about us	1
somehow i lost track of how many men i have slept with but i can still name all the women	1
<user> it de blasio a libtard illegal and moslem supporter	0
looks like lee rigby beheading must have happened on a moslem holy day since they carried out the manchester attack on it anniversary i see a market for t shirts that say wearer carries bacon bits to send moslems to hell do not blow near me	0
curanis are nigger jews	0
there is no epidemic of gun violence in america quite the opposite in fact but last week shooting at a high school in florida was a grim and jarring reminder of deep cultural problems lurking just beneath the veneer of our materially comfortable society	1
i am not the majical hefer that can save sucker boys from being chimp niggers they desperately search for titties to latch on to here a solution call me crazy stop being a sucker	0
altright is not limited to whites those dems are also going to be pushed into embracing their white identity altright is the most reality aligned political movement and so it will become the new right and displace the uniparty	2
and do not get me wrong either i only have a few muted i did not enjoy another clown telling me that sharia was the only way and women should submit or die i do not have time for that shit especially with a household full of ladies including the cat	1
just what we need a sandnigger goatfucker for governor ffs	0
is it still a psy op when the ppl that you are trying to convince are mindless sheep that will sleep walk wherever they are dog whistled oh they said america patriot flag imma bomb that country i do not like islam therefore israel is my greatest friend not buddhists or hindus no only jews	2
<user> i hate you	0
<user> so its not only old muzzy men who are pedophiles muzzy women can marry little children too	0
lasvegasshooting lasvegas who do u trust isis fbi msm so far isis greater credibility and now dominate narrative in muslim world what westerners believe utterly irrelevant isis winning muslim hearts and minds who dominate through rape crime impudence violence in modern west	0
<number> taxi drivers sentenced and <number> more suspended in newcastle for raping and grooming children why is not this headline news bbc i will tell you it is because they are all pakistani heritage muslims who single out white children to groom and rape ignored by our liberal elite	1
i think you indeed can call people nigger if you so please	0
as tears ran down cardinal timothy dolan fat cheeks he begged that all the refugee immigrant muds not be deported for he knew he needed a fresh supply of brown boy meat racistfanfiction	0
black race sucks because i am surrounded by pot smoking unemployed welfare leeching niglet making prison worthy niggers and i hate them	0
i got in trouble with the twitters for messing with bots what a fucking nigger	0
mommy is a retard and so his her demon spawn	2
<user> not our problem we are not the only nation in the entire world who can save those illegal aliens p.s. refugee has a very specific legal meaning and you are purposely misusing it in order to euphemize illegal immigration	1
so the average european is welcoming these nigger and sandnigger rapists into their cities towns and villages	2
<user> loving the new season of your show when you said go be a nigger somewhere else i laughed so hard people at work wanted to know what was funny keep it up and god speed	1
you traded the flh for the ninja do not be offended but i call sport bikes nigger killers	0
<user> pakistan bangladesh are muslim majority nations both persecute their minorities brutally so it is important that india give shelter to hindus sikhs jains buddhists christians from these nations wth is muslim refugees pak bd are killing muslims too	1
<user> <user> what a butthurt wigger	0
i am so tired of these kike terrorists and their evil lackeys	0
you all be wanting a real bitch then do not know what to do wit her ✌ 🏽	1
shuttener of kike banks	0
what kind of mentally cripple people would collect money for refugees at their daughter funeral after a refugee raped and killed her we would never see a muslim family in the middle east rasising money for a christian who raped and killed their daughter they are winning because we are letting them	2
<user> i love dykes fr	1
it is wat it is im gucci tho they say the homies woofin on me them bitchs goofy doe	2
she says unironically as jews control most of the supreme court and laws most of congress all of hollywood media news all the banks all academia and are the most billionaires makes perfect sense	2
you are not even white ya fucking kike suck that fuentes spic dick more fake ass kike moonman	0
shit i forgot to include arabic hebrew yiddish spanish swedish finnish fucked beheaded goat sheep and chained up slaves in burkas speak to be inclusive and tolerant of religions rats vermin weasels bacteria women being raped by maggots maggots fucking goats am i missing anyone	2
i am not apart of the black community my community is the circle i have created comprised of people i love and respect i was raised around my black relatives but not ghetto black culture there is a huge difference between marvin gaye and snopp dog	1
we owe it to them to give them a real holocaust this time it the just and noble thing to do	0
twp is not siege idk what have you that retarded idea	2
doubt you are even white but if you marry a niggress nothing of value would be lost i mean you can not even form good arguments your black kids will probably be smarter than you too	0
yeah call me a kike because i called you out for being dumb and dishonest tell me that to my face faggot see what happens	2
yo man not a “ hood nigga ” he just live in the ghetto	2
of course his white ass dropped it	1
memes calling non jews the vicitms of the jew didnt exist a year ago people are beginning to understand the many ways that we are the victims of the jews jew are not the victims we are victims of jewish infiltration	0
bro why do asians have a low alcohol tolerance this is not fair	2
that because the citizens are picking up the slack for the trash the muzzies don t pay for just generate	0
<user> reject radical islam	2
before anyone passes judgement i wanna let it be known that im <percent> trailer trash	1
<user> yeah but would you kill all the interns	1
gab is a retarded con game run by <number> year old faggs	0
do you think admitted mudshark and slit licker <user> looks like	0
ur mom gay	2
i fucking hate kids they ’ re demons	0
i fucking hate when my packages are delivered by fedex just leave them in the fucking front goddamit i paid for <number> day shipping at <user> for these dumb asses to not deliver my package bc nobody is there ups would never	1
hoe you can not touch this	1
shalom aussie goyim my name is gladys berejiklian i call myself an armenian but in fact i am a ratfaced kike looking to implement communism in your country do you like my gallah beak	0
<user> <user> <user> we need the media to quit making everything about race according to them every white person is a white supremacist and yes i blame the media	1
sessions cites bible to defend separating immigrant families hotpagenews com r <number>	1
dislike food eggplant capsicum paprika favourite colour yellow charm point mole at the mouth strong point brave weak point too serious favourite fashion black and white with only the shoes in colours cap hat	1
bad drunk dick in her throat skrt skrt this nigger	0
although it sounds like too much voter id should be looked into with a different reasoning the illegal immigrants have no right to vote for that matter they also have no rights that citizens have some way of stopping them from voting till they are deported or nationalized	1
<user> i adore the plump all white one reminds me of one of my boys <happy> i tried one of those kobo sp dog treat dispensers and my lot just ate through it to get at the treats lol love how happy they all look x	1
<user> you are cute 😘 💋	1
<user> deadass italians from sicily refuse to claim whiteness because like apparently in the 1 6 0 0 there were africans on the island i am not fucking kidding i have had this exact convo w multiple italians who all say the same thing and for some reason refuse to identify as white	1
<user> do it i wanna get the actual words white trash in metallica font somewhere on me lol	1
piss off kike	0
bring back the p**n <censored> and kick the nazis off	1
<user> <user> i can ’ t even lmao how dumb and retarded are you irl	2
<user> i can not decide darlifra is a fucking conservative nightmare but cross ange makes a rape victim apologize for being raped among many egregious offenses it like choosing between burning at the stake and being caught in a volcanic explosion	1
last week i ate at a new hipster bbq restaurant and heard the most god awful nigger noise ever blaring from the speakers it turned out to be what apparently passes for country music these days what the fuck happened	0
<number> of <number> borders are being erased fundamental human standards are being toppled the refugee stampede and the sexual perversion are promoted by the cultural marxists as a way of destroying the middle class barrier to establishing their social tyranny and by the multinational corporations	2
justin looking mighty fine in his white polo shirt	1
you can be ghetto and not be ratchet i ’ m ghetto for sure but fighting all the time is ugly	1
<user> <user> because in <number> the republican party is a clown car full of white nationalists and conspiracy crackpots who are easily exploited by fox news and hordes of supplement selling grifters funded by billionaires who will not rest until they are trillionaires and the rest of us are slaves	1
eww a mudshark with a niglet	0
never too early for you to get raped triggy	2
<user> why is it the left can bring up charges on just about anyone they wish and the right sits back and watches can the senate not bring charges of judiciary misconduct foreign interference slander or perhaps harassment against them maybe the abuse of power for the past <number> years	1
this is the shooter — nasim aghdam a muzzie immigrant from iran	0
think about you i dream about you i talk about you i smile about you i cry about you i love you i hate you i need you so bad	1
<user> first time twitter deleted a remark i made about the muzzie scum i deleted my account i do not need twitter	0
<user> who gives a shit what the illegal mexican immigrants or libtard deluxe anderson thinks says or feels 🇮 🇱 🙏 🇮 🇱	2
<user> the bad bitch life is not for everyone	1
<user> my illegal alien maid confidently told me last year how proud she was to have voted for hillary and i voted for my husband too she told me	1
i have negro approval i have finally made it in america oh lawdy lawdy i thankesez you massa	2
so many muzzies where are you thurso	2
hitler met with muslim leaders he had a lot in common	2
butt bois take the side of fag deroofing raghead invaders over meek christers because they know they can abuse the latter without retaliation	0
it run by a white guy why do you assume all late night food stalls are run by immigrants racist white people do shitty jobs too	2
well the fbi is a faggot gestappo founded by a paranoid tranny to act as a political witch hunt and false flag tool for deep state faggots like the mafia for politicos always been like that its just stark right in your face and undeniable here	2
can put your money on the retard commentator saying after <number> seconds west brom have made a better start than they did in this fixture last season	1
although the term feminist is rightly associated with obese ugly lesbian man hating termagants the term anti feminist is associated with misogyny in reality however the greatest enemies of women have always been the feminists who are generally freaks opposed to biology and female nature	2
personally i would prefer to see chimps with rpgs move into the house next door than let more muslims have access to nuke technology people who think more muzzies with a bombs would be wonderful can explain themselves	0
but he a spic so the jury figured that was excusable fuck daca fuck sanctuary cities fuck immigration fuck democrats may an earthquake destroy frisco	0
with a bull dyke as a roomie	2
hurr durr such savagery if our civilization dies out roaming negros rape women like the soviet army occupation of <number> at least we will not have given into savagery hurr durr victorian england was so patriarchal and savage hurr durr these brown matriarchal people are so civilized <user>	0
those that are for illegal immigration and islamic culture refugees are idiot liberal progressives and globalists shills	0
i think he missing a trick here the jews are the biggest threat to america short medium and long term there will not even be an america if their clear and present danger is not dealt with by the us defense forces homeland security dept of immigration etc	2
you takin shots at a bitch that ’ ll neva care	2
<user> refs are retardos	2
you get flak when you are over the target but you do not hit a moslem target if there are not dead kids used as human shields	1
breaking news sara is a misandrist bitch and race baiting cunt oh wait that not news that just what you do every fucking day	0
<user> <user> muslim have <number> muslim country why they not taking refugee from bangladesh in there country why muslim refugee just want to come in europe india and america	1
<user> i get that about once a week fuck twitter and their protect illegal aliens and trump hating censors	0
i don ’ t hate you i ’ m just disappointed you turned into everything you said you ’ d never be 🙁	1
lmao the lack of retards is making me retarded	2
<user> <user> why does the little nazi have a blue checkmark	1
ghetto whites influenced by ghetto blacks can you give one example of when black culture has influenced whites positively nb4 rock n roll	2
ayo hol up who did not pick moon man moon man pull pull the trigger on ever y nigger fam moon man shooting niggers while he snickers moon man the one man klan	0
the sephardics never whitewashed themselves they are true brownie jew arabs	0
blacks invented reading	1
ostensibly straight men dress and talk like they are gay and women cut their hair short and dye it weird colors so only butch dykes find them appealing	2
lara confirmed ugly bitch with several physical and mental deformities all of which i can prove you worthless menstrual pad your mind and energy is evil and dark and you are full of shit your data is useless even the fancy boys reject you <user> ‍	2
<user> <user> <user> <user> illegal muslims are not india responsibility why dont muslims countries give them refugee why they call themselves muslim countries if they dont want to give refuge to muslims	1
individual faggots are tolerable so long as they stay in their lane and keep things discrete a society that promotes and celebrates faggotry is doomed	0
<user> <user> <user> <user> <user> <user> <user> <user> <user> <user> <user> <user> <user> <user> <user> <user> <user> <user> <user> <user> <user> <user> <user> <user> <user> ur r shudh <number> percent photoshop fake jihadi	1
<user> some white ass names	1
exactly but really all mentions of jews specifically had been scrubbed except for the holocaust narrative we are not accustomed to seeing people as groups plus unless you grow up around them we do not see jews or at least i never did they prey upon our good natures	2
i don ’ t like any bitch that says he him lesbians aren ’ t valid	1
it would really break my heart to see that nigger come out of the hospital with a vicious staph infection	1
omg this is how to deal with the faggots and immigrants from lesbia so fucking funny crowder is a genius	0
yep communist nigger fag	0
i guess i gotta be a syrian refugee to go to russia	2
exactly right in fact the only immigrants to assimilate in less than <number> generations are the asians due to their propensity to over achieve the black population was kept from assimilating by democrats	2
<user> <user> is not chad one of those shithole countries tromp talked about 🤔	0
y know how rich black athletes move from the ghetto into the mansion district and immediately try to turn their new neighborhood into an upscale ghetto that is exactly what the liberals migrating to fl are doing turning it into a purple state go back to your liberal northern shit holes	0
<user> you mean illegal immigrants	1
now she ’ being a fucking nazi terrorist and i ’ m a republican communist or something	2
<user> <user> <user> leave your brother alone time will kill all that stupidity anto na obinna	1
just a part of their victimhood narrative the only target of anger should be their own in wakanda who sold them to the jews and arabs really they need to be repatriated by force no exceptions even dr carson	0
i love picking up annoying retarded habits that i think are funny	2
the sand niggers are the kinder mutti merkel could not be bothered to have her fur backed babies	2
they have no water no food but breed exponentially the human race is fucking retarded world water day	1
i disagree those you list are normally covered by the term sub continent asians are thai malay burmese indonesian etc	1
<user> <user> where as her bud adolf would have let his nazi nationalist make her into a lampshade	2
critcizes islam muslim twitter fucking bigot 😒 😒 may allah guide you 😭 😭 😭 straight to hell 😼 ☝ 🏽 💯	2
antifa domestic terrorists elderly people can be nazis kk being old does not exempt you from criticism terrorists murder people antifa has not killed anyone kk neo nazis white supremacists have killed thousands	1
gope still does not get it worthless windbags despite getting multiple fuck yous from america you retarded think it no big deal fuck off mccockbreath ryan and all the other fags	2
a random ghetto spongebob meme <number> u	2
as a white person i am sick and tired of being judged by the colour of my skin by people who have complained for decades about being judged by the colour of theirs	1
well shit man mup da doo i would sit here and nigger post back and forth with your dumbass all night but i gotta make bread in the morning	0
europe is being destroyed by the kike eu which is run by the crypto kike juncker to destroy whites	0
<user> good job scamming you fucking faggot	0
big drunk lean no guns shootin this nigger	0
so you are who kike central sent to gab to stop shoah <number> electric boogaloo i realize team kike is spread thin with so many websites to keep the goyim from knowing on but fuck how well are you sleeping these days	0
hahahaha the greasy nigger slid right off 😹	0
i am an ashkenazi jew	1
a birthday action game character that is not a queer bee	1
can you believe this brokedy broke nigger was over here with a white bitch in the park kissing seriously the white bitch more fucked up then the niggers are is not that like raping the handicapped seriously why would a white bitch choose a nigger <number> she be retarded drugged to	0
rich lean in my pants in her throat suckin this niggers	2
yet another sand nigger heard from	0
goes back to when the jews now <number> but a tiny alien bolshevik minority helped set up the naacp primarily run funded manned by jews all through the uncivil rights era adding the negro <number> to their <number> increased their reach <number> fold they use negroes as shocktroops	2
do you see that nice black and orange fish with a nice grin over there	1
it seems that a lot of immigrants have gotten fired for showing up for protests rather than work as i see it that an appropriate punishment try not showing up for work while in the military and see what happens any military not just the usa	1
happy eid al adha to out muslim brothers and sisters ❤ ️	1
most jewish writings indicate that what we call a superiority complex is combined with a persecution complex sprinkled with paranoia how else can it be explained that jews are so universally fixated on the alleged <number> million jews who supposedly died in the holocaust	0
they are planting evidence suggesting that europe was moslem land to make moslems feel more entitled and the native europeans feel more guilty therefore easier to submit and surrender to islam it psychological warfare	1
whoever is having sex rn have some for me to 😂 lucky bastards	1
even whites hate whites in fact to not hate yourself if you are white and to think you have a right to exist is white supremacy in the current year so it just objectively true	2
the national health serivces of the uk making tax payers pay for insanity biological men who regard themselves as women are being invited for cervical smear tests – even though it is impossible for them to have a cervix – an official guidebook states	1
aa crazy rich asians and never been kissed for today	1
too many of us dying for no reason that shit could ve been prevented she was a trigger happy ass white bitch	1
do not blame the gutterslut nature of modern women on her husband that kike feminism talking	0
nah we are pretty fucking far from even but the scales will be closer to balance if you live a long enough in the boomer depository for your nigger caretaker to turn your asshole inside out in between raiding your meds and personal effects enjoy your golden years faggot bobo will	2
<user> btw i need numbers people all my friends left my fat white ass	1
let us not forget the kk was and is an honorable crowd they formed to protect white women from the nigger predation and whites in general from nigger crimes niggers have iq of <number> and high testosterone they have to be dealt with have to	0
saint sir adolf was the most lied about person in history for financial political and kike reasons alt right history lesson	0
only in a sprite commercial can black people look retarded dancing	2
you are a truly pitiful excuse for a homo sapiens pitiable pathetic i pity your kids if you have any growing up with a role model like you sad tragic	1
loretta lynch some white in her woodpile remember when she addressed muslims in america i will protect your rights what about the rights of americans not to be raped and abused by islam just another token tutsoon	0
kill a muslim family every day kill the muslim terrorists from the root facebook employs muslim mother fuckers and they support muslim umma fuckers in facebook zuckerberg is a muslim supporter and a traitor	0
but violating it will not look at the entire structure of censorship sjws need the <number> billion muzzies as cannon fodder for the war on the west but they do not want sharia law prince whatshisname does he is not calling the shots cultural marxists are	0
<user> i got raped by an alien did not i	1
<user> yo not gay its wit da bois	2
we could literally build a utopia in antarctica and i guarantee deconstructionist ghetto people would be demanding we foot the bill to bring them there	2
<user> every white person in your classroom is gonna hate you	1
the jews “ lol we killed jesus ” god “ you never saw this coming i summon pot of greed to draw three additional cards from my deck ”	2
islamic jihadis are his allies and brothers no fucking words wow you spoke to me first i am simply explaining why i support islam sharia being introduced to the west and why islamic jihadis are my friends brothers and allies you women chose not to be my allies and thats fine	2
<user> ‍ good job with jf for a thot also it makes me sad hearing a girl my age having the same anxiety about society that i do but it justifying at the same time also also the saying nigger test should be the front line in the fight for free speech	0
well if it works for you two thats all that counts however when u post silly drivel here about doormat women then people may question your uh veracity	1
<user> they are illegal immigrants not asylum seekers	1
kill the jews	0
snickers have come out with a white chocolate bar ice cream bar i can not stand snickers because i like my candy like i like my women no nuts	2
you are replying to torbas post in defence of a kike that calls people goys you seem to of forgot jews killed jesus the first problem is people like you jews are next you will be gassed first	0
wea df all you saints fans come from 😒 go back to yo faggot ass cowbitches saints won 🤪 🤪 ⚜️ ⚜️ ⚜️ like bitch who are you 😭	2
maybe trump will care about his supporters when he done sucking kike cock too bad there no end in sight	0
pussy nigger loving loser	0
<number> dogs are gods greatest creation probably why mudslimes hate them	0
the moslem is not the terrorist having a caucasian or some other race member as the terrorist in order to reaffirm msm narrative that terrorism has nothing to do with islam and all whites are bad	0
i smell taqiyya tacos do you guys smell that too most likely not a white dude smells like a muslims work all day long	2
lol i tell ya what now your going old school i have not heard tarbaby in a long time	1
because it is fucking gay let go of that ocd shit we have plenty of battles right now <user>	2
<user> i love warsaw i am american but i have got a lot of good friends there the nightlife is great and the cost of living is nice too not too many refugees at least not yet	1
<user> ideal image girl it was full of white oriole so i wasn t surprised but i figured since they claimed to have the laser i would be good they were so dramatic i about it too like i will never go there again	1
a lesbian lass from khartoum once invited a queer to her room they spent the whole night in a terrible fight over who would do what and to whom	2
some white ppl called me a stupid nigger last night	1
i love the muslim unity amongst islamic nations how come they did not take in even one muslim refugee 🤔	1
however now that gay men are being called transphobic you clutch your pearls first they came for the lesbians and i did not speak out because i wasn t a lesbian then they came for all women who dared to question and i did not speak out	1
1 2 h ago ching chong accepted your friend request ❤️	2
khazars were terrible people who installed an oligarchy over ukraine whether or not you accept the khazars theory jews today fucking hate jesus and white christianity so either way these kikes are scum of the earth	0
i think we are past the negotiation phase it time to issue an ultimatum all sand niggers and kikes out of america or get executed an invader	0
you are confusing ghetto niggas with christian blacks if you do not see a difference it because you have not associated with many christian blacks but then why would you you are an atheist you and i do share the common goal of stopping more anti white mongrels from invading america though	0
that bitch be shootin like it ’ baghdad	2
<user> she was fine until she said ghetto she tried it she rly did	1
critise islam and you will be permanently banned from twitter i never threatened violence i never promoted violence ironically islam does so here i am at gab another redpilled refugee of the culture war	2
cool i see white people having babies with asians and blacks at this moment	1
<user> is that why you invite uninoculated and illegal immigrants to run roughshod in wa	2
detention space for illegal immigrants oh my dare i say concentration camps gas the spics border war now in all seriousness detention camps are necessary you can not let beaners roam around raping and pillaging you have to lock up all the taco niggers until you are ready to remove them	0
karma is a bitch	1
there is a total onslaught against white nations worldwide and israel is a old age retirement village for barbaric khazar kikes it has become a refugees state for pedophiles do not believe me truth fears no investigation	0
he got blasted by some in that tweet then that jewish kike told him hey tribe lets getting oscarssogoysih trending will fox news show his tweet on that	0
as long as you do not call them ugly kike whores you are probably fine my feminism allows men to respond to bitchy women as well preferably in a classy way myself included but i mean women like <user> are classy only in maga fantasyland using words like dyke and faggot deplorable	0
<user> <user> oh no being a mediocre white guy is not panning out wah time to be a nazi	2
ignoring the truth jc shannon <user> <date> <time> msm ignores sweden immigrant riots because it does not fit their narrative trump right again newsbusters org blogs nb nicho …	1
exactly if a low iq nigger from africa who can not read can understand islam i think i can understand kill the kuffar nothing subtle lost on me	0
not me getting foundation on this white christian dior collar 🤒 🤒	1
they look like plain ol pale skinned niggers to me that sheboon looks like some kind of mutant anyway with those chinky eyes	0
<user> lol fuck you too	2
i did not own any slaves my ancestors never owned a slave i work my ass off for every dollar i get so shove this crap up your bigoted thieving nigger ass ms never was a slave	0
i am not judging i have dealt with a psycho broke ass negro that worse	2
<user> coming from your position of power just mentioning it constitutes pressure you d understand that if you understood sexual harassment which you do not as your past history demonstrates you are by far the most ignorant person ever to serve in the white house case closed	1
but if white trash originated in african american slang it was middle class and elite whites who found the term most compelling and useful — and ultimately this is the crowd that made it part of popular american speech https :// thesocietypages org specials white trash	1
so tired of all this gay shit	1
<user> and you are proving your ignorance more and more like i said i am done arguing with a ass scratching finger sniffing redneck do a little research and then we will talk	2
for all those who want to discuss or debate with me you shall uphold the ethics of a conversation or find yourself discredited for internet violence and your argument is automatically nullified muted yes i am the smartest being in the universe deal with it	1
so it seems fagbook let me back in but let see how long that last before the ghetto welfare queens kings pc sjw and trannies start whining and blocking me from my free speech rights	2
denver has a black problem a muzzee prob and a wetback prob	0
i did not realize that <user> was still taking up valuable airspace on the radio i am thinking we probably need more leaders <user> as opposed to more self absorbed entertainers kike cantwell and anglin	0
only fuckin faggots hack people to keep them out of job and money for a few years	2
blacks in 1 8 0 0 lived better under white slavery than whites live under jew slavery today	2
god made the niggers he made them in the night he made them in a hurry and forgot to paint them white	0
use coupon code “ holocaust denial ” for <number> odd at checkout	1
i have bought three dresses on this trip they are all white and black i guess the lesson to be learned is that unconscious patriotism practicality	1
it was then that gay retard world revealed itself to me	2
jewish altruism tax deductible action furthering jewish hegemony done in bad faith support of the adl splc aipac ect is tantamount to treason left on checked jews will always destroy their hosts given time jews act this way b c they are jews its their nature have a white christmas	0
ugh time to be a pumpkin slut	1
you must be removed from earth you gook trash	0
<user> he blew out smoke as he looked at the other raising an eyebrow and smirking a little classic white trash over here	1
yeah her ass to strict i wanna man like that i see them white bitches be saying all she does is sleep they will whip him anytime bye	2
<user> yea u ’ d be retarded go to werk guy	2
c mon dude that retarded china is huge and has <number> 4 b ppl that insanely stupid	2
back in the day you had two sides of greenville historic district filled with beautiful homes and the ghetto now it is just one big ghetto of broken down historic homes casinos did that oh here the pictures of the old greenville bridge and a new one	2
it hasnt done naz shah vile muslim mp any harm for liking a tweet telling raped white children by paki muslins to keep their mouths shut for diversity has it fucking paedophile labour party	1
<user> <user> when like minded immigrants are settled into one community the results are obvious	2
not that we did not know before but the times are reporting the police did cover up the moslem rape gangs in rotherham they probably took part in them if you ask me of course silence from the pedo at the bbc this morning	0
yes yes i know i know a hell of a lot about islam and the way it works khoebaha does not come across as a jihadist you however do mr porcupine	1
if anyone tries to tell you that gay lesbian people are pushing the genital preference conversation remind them that literally no homosexual on the planet would ever come up with the term genital preferences	1
gee <number> top gab fucks start a thread i wonder how many fake accounts are on this list a sand nigger a street shitter and chemo head walk into a social media site no joke	0
nice deflection kike nothing to do with the subject matter you jews are all the same	0
sincerely remorseful hang his worthless raghead ass asap murderous scum	0
<user> dammit man get this ching chong shit off my feed	0
<user> i ’ m not playing he ghetto as shit 😂 then why around there 💀	1
this article pretends it the right doing all the violence and intimidation at street events	1
i could not care less about any other ideology than a pure white state the form of gov we have to me is almost irrelevant you only care about muh nigger equals such a punk faggot take your cucks and gtfo	0
no he does not he fucking hates trump the kike is gaslighting you	0
i be bathing in hunneds white bitch with a onion	2
unknown artist describing jihad islam	1
this raghead is a brick short of a load	0
<user> <user> bend over and let illegal aliens take advantage	2
england women scoring in the last minute of that netball competition to win gold is the greatest sporting moment in history	1
what inspire me is teaching african refugees how to program javascript what inspires me is finding out how to use maglev trains to get resources to the moon these are the challenges that tomorrow going to face	1
<user> remorseful my lilly white ass 😡 😡 😡 👌 👌 👌 👌 👌 👌 👌 👌 👌 👌 👌 👌 👌	1
the white house is giving states the power to reject refugees from being resettled in their communities and this announcement all but guarantees that politicians will try to end refugee resettlement in our state completely	1
<user> ok buddy retard	2
you d have to be a complete retard to not know its mccain you d have to be an even bigger retard to believe q anon is real you morons are giving this larping queer the attention he wants	2
two questions <number> how did you get a picture of my dick <number> who the fuck put a kike star on it	0
<number> black people placed in world strongest man in <number> in fact the top <number> in every wsm event is strictly european white no hispanics or blacks or asians lol u mad	2
im sweet and don ’ t have the nature or guts to be rude bitchy prestige and sadly people take advantage of it	1
litterally standing in line waiting while these two sheboons argue over there fucking allowed ounces of cereal on there w.i.c benefits	2
i tell all my hoes rake it up break it down back it up fuck it up fuck it up	1
or perhaps you just wait until the nigglet is older to be a real thug make a crime and go to jail and there he meets dad in the neighbour cell	0
my problem with these kike lovers is not what they are not doing they are punching right that the problem if they want to keep their fuckin mouths shut fine	0
<user> <user> the police union and this rag head woman has the nerve to get angry with him for calling out that racist cop	1
daniel boone was a man he was a big man but i was bigger so he ran like a nigger up a tree	2
that happened when you allow a rat yid in your country	0
<user> ha this coming from a two time loser not to mention that she one of the if not the most corrupt person politician the usa has ever had she fails to mention that her popular win were from the illegal alien votes	1
why would a muslim wanna leave the country 🤔 this country i mean not his own shithole gross a rab country of course he would want to leave his own country even if he gets arrested it still way better than living in whatthefuckistan	2
oh now you are using my lines they do not work on me nazi faggot lol	2
<user> <user> <number> children have recently been raped in montgomery county maryland by illegal aliens some of those rapists had been previously deported but managed to reenter our country shame ice could not catch those criminals before innocent children had their lives changed forever	1
i want to put on makeup wear a skirt and sing along to songs acting like i am a fucking queer rockstar	1
ok let say ur all racist and shit and u just avoid black ppl like some racist fuckin nazi sure u dramatically lower ur odds of being the victim of brutal violence but is that really worth it	0
free women rule hold your head up high wearing freedom pink hats and vagina costumes are for weaklings who support holding women down for sexual offenders with the initials bill clinton 🇺 🇸 👸 beyourownhero maga	1
<user> obviously the founders wanted unlimited low iq immigrants to come here and live off of american taxpayers that the original vision white enslavement 😉	0
i am shocked at he fucking refugees in our news media	2
sorry white men you are just begging to be cheated on vice	1
count on it kikes	0
this is bad news for the children of millennial women if only <number> of millennial women want to be housewives that means that potentially <number> of their children will not get enough time and interaction with their mothers which is unhealthy i just wonder is <number> the floor <number> <number>	1
i am a little surprised femi commie nazis have not declared ejaculate itself to be emblematic of white supremacy	2
are they 2 nd 3 rd 4 th wives the muslim child birth rate is out of control and the <number> bastard are letting it carry on they really believe that soft politics will curb their desire to have a calliohate in the uk <number> mps and so delusional and dangerous	2
<user> i think in <number> agreeing or not with gay marriage personally a lot of people concur with your sentiments for some it interferes with the practice of their religion what would you say to the gay marriage bake me a wedding cake scenario	1
no white person should ever work for any jew not ever for any reason	0
bro twitch is so retarded imagine banninf someone cus they broke a keyboard and labeling it as self harm bunch of fucking 🤡 work at twich bruh	1
<user> woman beauty then she went on this woman instagram page and wrote disgusting comments on nearly every pic this woman posted saying why you so white you have no melanin ew he ugly he needs son regarding a baby saying her other grand kids was trailer trash etc	1
america is an example of ethnic groups interacting with one another in peace now if we could just get the democratic marxists to let black people off the ghetto plantation we might be able to get things cleaned up	2
lol you know the more middle eastern women i saw over there the more i came to understand why the men fuck goats	0
next time you hear someone bitching about jury duty remind them of today and the jury of <number> black people <number> hispanic asian and <number> wypipo that found this white woman ex cop guilty of killing a young black man we need us and our allies on juries	1
looks like we have some muzrat filth that has now ventured on to gab	0
<user> <user> btw nice job threatening violence against an elected official you mongoloid	0
if women can do anything men can why have not they successfully suppressed an entire gender yet	2
such a retard	2
hell yea bitch dis go hard as hell flocka i will suck big dick team slut all day and week month year and century i love big naps d i c k q u a d	0
if in <number> the man i believe to be a criminal sexist racist xenophobic homophobic white supremacist was re elected i d move unless i do not really have a problem with someone being those things or i never believed he was those things to begin with trump 2020 kag maga	1
i have found another degenerate who is pushing smut on gab not a joke he is actually promoting smut and porn <user> is a degenerate diversity kike hiding behind patriotism i am not so easily fooled	0
<user> muslims voted for <user> bjp team b and got the government they deserve	1
<user> to late evil comes only in trojan horse as islam	1
hey nfl fox instead of segment promoting black football players how about a tribute to white women raped by black football players although due to time constraints that may be unrealistic	2
yeh true but they have been moslem for a long time without bothering jews the jews living in palestine before <number> had good relations to them and even afterwards they thought that would continue to be the case under the genocide started <user>	1
<user> <user> that that white supremest hand code i hope you reported this it a terrorist threat	1
be nice now we clearly know <user> ‍ does not fuck his mother he a father kinda gay uh guy maga presidenttrump triggered faggot dicklicker <user> ‍	2
<user> republicans don ’ t hate gays	1
hey england time to ban bridges white vans and vigils the <percent> of you that are sick of loser muzzies need to sack up and take matters into your own hands ban islam ban muslims	0
nigel farage edward the 8 th the brits should crown nigel before nignog babies inherit the throne	0
how do jews use the state or any organizational position of power to bully those they choose into corruption and degeneracy start with congress i understand that they take leftist sometimes anti white positions at political rallies do you have specific examples	2
here are some new one groovin on down to gitmo krusin in kenya if your gay and you know it clap your hands treason is the reason	1
just had a talk with my dog and he agrees if a moslem or any other assorted brown person comes to a white country and has a bad time he can go back to his land where do we go when we have had enough of them	0
the only problematic issue in islam is the fact that it calls for the genocide of all kafir non muslims infidels breeding terrorism instead of exposing this to the world while it watches and focusing on either reforming the religion or purging it everyone is focusing on muh womynz rights	2
did you see a sign outside my house that said dead nigger storage	0
fuckin hippo doppelgänger negress	0
moslem are nothing more than cockroaches that need to be exterminated from the planet	0
<user> <user> poverty is the worst form of violence	1
<user> its because stan twit hates on every white person 💀 💀 💀 like bro its not that serious	1
if white men r problem how come black mail is criminal an me a dog	1
why come wizards have so many towers	1
sounds about right must suck to be a retard that can not get a real job and to be conscious of that	2
<user> no but someone got silk touch and placed one diamond block at level <number> to troll them haha retard	1
i remember something to that effect gotta dig deeper for the pedo thing i may well have him mixed up with another yid with that name they are all demonic shapeshifters after all	1
0 u0 lmao wow fuck you too 😂 😂	1
maybe it a sign from god that anglin really is a nigger	0
why canada got so many bad bitches and they all from quebec	2
god dam i almost sneezed mah lung out i hope dis nigger air i am breathing ain t giving me aids	0
top quotes from tonight include <user> saying they are a slytherin and proud because they are fucking queer 🐍 also gryffindor is so heteronormative and basic it for people who have the personality of bread and courage 🍞 🦁 bam ein publishing <user>	1
<user> <user> coming from someone who finds it necessary to kill all the cows in this country in the name of global warming	1
my wife and i agree <percent> let mother nature cull the nigger herd	0
bisexuals lesbians 🤝 <number> being our year	1
lying kike filth the false dichotomy here is your false dichotomy between capitalism that mistreats workers and marxism guess what kike there is a capitalism by which workers and owners are complementary fascism	0
<user> it okay to be white	1
real niggahs do not get in to that	1
nothing worse than a ghetto white bitch that says the n word	2
well i think nigeria would be alright if it wasn t for the moslem group boko haram oil revenues help but then always wants it for themselves i spent <number> weeks in abuja and the city functioned well with people out and about working and relatively productive	1
based poland will deploy the shrike force nigger cleanup robots	0
when scrolling through uk newspaper headlines it becomes terribly obvious that uk is a cold hearted degenerate shithole it is no wonder that children are raped by muslim gangs for decades while most turn their backs	0
honorary holocaust survivors these <number>	2
<user> did not finish i found the quiz retarded	2
white billionaires and one loser inbred smelly muzzie protecting their highly overpaid antique farm equipment being disrespectful jerk offs this far into the nfl season is somewhat surprising seeing the slow bleeding week after week is a bonus though	2
<user> i am trynna make it a non gay offensive slur lol i only call non gays faggots you a faggot if you got some bitchassness in you feel me	2
punches my small gay ass	1
never happen european men have been emasculated by their domineering women such as the swedes may and merkel and they have no weapons	1
tfb maybe if they were something other than thieving arab terrorist scum their fellow arabs might give a shit	0
yah fucken filthy niggar	0
yeah dis the ol profit see how fast the mudslimes teach him how to hang glide sans glider	0
he is using a flat projection map to prove that shortest distance would not go through alaska on a globe he then saying it fine in un style map un style map actually makes northern hemisphere similar to globe map southern hemisphere is absolutely retarded on un map though	1
and there is nothing as bad as a filthy kike	0
sadly many will swallow the lies add the twatter purge which no doubt western govs are also involved in europe is moving to totalitarian states be ready to fight for your freedom or be a subservient of islam moslemsaretheproblem	0
a home fry is a potato from the ghetto thats all gang bangy n shit	2
op is another misdirection shill here to fuck with your head boycott this trash there is <number> reason to push unsecured links to known criminal censors propagandists op is either retarded or has another agenda against you boycott low effort ops downvote and report <number>	2
anyone whom jews deem useful in destroying white civilization is fully funded with no questions asked	2
give me a fucking break as if there is something to debate here blacks are inferior to whites and asians by every measure that why black communities are an absolute mess if you believe in evolution you have to accept equality is a myth	2
<user> when i say niggas i mean dykes nd guys 🤣 so actually i did not	2
israel is full of revolting arabs that also do not like to study just like to learn bomb making and acid throwing	2
so now you are calling yourself whoever agrees with you severely retarded baboons	2
perzactly move along go be a nigger somewhere else	0
i am much higher time preference on this issue i do not want to pave a road i want to remove the jews from power to stop this deconstructionist anti white morass of misery they have forced on our communities	0
fellas be careful she texting other niggas	1
these two self serving pieces of crap are okay with possibly destroying a person livelihood who only being true to his religious beliefs who gave queers the moral high ground sick of this libtard lgbtq hypocrisy	1
<user> jihad is mainly responsible and jihadi 🐖 like u r greatly responsible stop jihad and world will be much much peaceful 😠	1
in hopes of finding good jewelries inside the treasure box yg lets go of the diamonds and picked up the golds	1
like someone said would not it be a hoot if a moslem bakery refused to bake a cake for a couple of faggots	0
<user> i will drive my white ass down to dallas from new york and stand right there with you justice botham jean amber guyger murder trial life in prison	1
the diversity of violence is not so diverse	1
gas this kike	0
i am not gay but i will fuck your ass like a faggot	2
too angry <number> b retarded 2 day	1
i have been put on twitter naughty step for <number> days for my post on ramadan ramwithvan comments on violence committed during this period yet this weapons grade cunt gets a reduced sentence for the very issues that i have mentioned 😡	2
i love ari fuck a hoe 😝	1
black women complain so much at restaurants 🤣	1
just attacked one of them faggots feelin pretty good	0
training rocky style to scare some loser inbred muzzie ass hamad an	0
not hard to understand why canadian asians are up in arms over calling moslem pedophiles asian	2
<user> it ’ d be an awful shame if nazis showed up and made things worse 🤔	1
<user> <user> <user> yes u r ryt arabs are very decent they dont let u feel that we r from different religion	1
i bet every muslim that strapped a bomb on or drove a lorry into a crowd had just lost his benefits they are sick in the head	0
i wonder if this pos judge has ever ordered a muslim to learn about christian faith for <number> mos at a christian church	2
making fun of retarded kids is bad but using them as a pawn in your dumbass lib plan to gain sympathy is worse i stand with corey wompwomp	2
what a stupid muslim like question i am pleased your pissed off enough to talk out your ass	2
but radical leftist propaganda and antifa websites are not dangerous right kys niggerfaggot	0
<user> women were gang raped in his house is it true women body found in backside gutter kf tahir	1
asians only if they squat stock version asians have flat flabby ass which is whiteharam	2
you are the definition of a kike who mad because you did not manage to exterminate all the goyim	0
it pretty much going that way here in america also only a matter of time before our women are raped and slaughtered in the name of islam	0
so the british government did not want you to hear a speech that raises awareness to the fact that the indigenous population is being replaced by muslim immigrants perhaps they are scared of the natives retaliating against this betrayal of the british people	0
if muslims are the only real men in white lands the only ones with the balls to show young hot pussy who boss then muslim men will rule and whites will cease to exist as they already did in byzantium	2
no worries the two we do have are certainly mudslime sympathizers	2
in tampa some blacks celebrated christmas by a drive by shooting on a 2 5 0 cc dirtbike the group of blacks fired upon instantly returned fire i think westboro baptist church is right about one thing kwanzaa is ghetto slang for murder	2
<user> <user> one where they president is a mob boss and running a crime syndicate out of the white house	1
right ngl lads lets censor the shit before stick up they ass bitches run rampant	2
good morning to all the <number> ’ <number> <number> ’ <number> women	1
proof sand niggers invented math	0
<user> the nazis like you got owned today owned	1
just another nigger heard form move along nothing new to see here	0
mohammed was a pedophile rapist murdering slaving retarded sandnigger prove me wrong	0
getting rid of the rich the businessmen and businesswomyn and whigger middle class would solve most of the problems once these inferiors can not lie steal and cheat most of their businesses will go under do not forget the jews lived in shitty smelly ghettos before being emancipated by satanic whiggers	0
call a doctor quick some moslem from a shit hole country has a severe case of the hurt feelings	0
edina vs eden prairie is the grape nuts of high school sports	1
islam and antisexist parading together are like nazi and jewish together	2
for once a moslem did a good thing one less future democrat voter and one less welfare check	1
so if jews are smarter than the average bear i guess their kryptonite is trains then or something hellnoitdidnthappenduh	0
that basically like being raped it pretty bad	1
muh based peanut butter dat da oneliest invention whites ain t steal from da black man actually blax ain t invent no peanut butter but it possible their <number> invention was slavery de jews invented da turrible turrible legacy of slabery ™	2
<user> lol new york is a joke now 😂 😂 😂 yeah illegal aliens from all around the world should go back to their countries what is wrong with that	1
paving the kike way goy	0
i guess there are enough token niglets at the wedding	0
look what they would get a nationally disgraced laughing stock who worked at a senior level she would fit right in with a liberal police department driving a black white around in the ghetto as a beat cop not lol	2
<user> <user> yea those people were immigrants too all one big melting pot of immigration lovely	1
british tourists to america were warned for years not to leave main freeways in their rental car there were a high number of cases of them being ambushed by blacks who saw rental plates and easy pickings the ghettos have never been safe for whites	0
<user> why donot those countries accept the muslims from all over the world if they are so empathetic	1
<user> <user> you do not support the queer community and u are a homophobe unless you listen to it let that sink in	1
in spoons three fishes table <number> dm for orders spoons slave fin sub spoons bitch findom spoons sub	1
scholarship needed <number> of <number> gay and lesbian fiction on abortion i am already including chelsey johnson novel stray cat into the paper please note how you want your name to be listed only replies to my email of record will be acknowledged	1
<user> please beat these white bitches up	0
<user> damn thoes legs 🥵 🥵 🥵	1
<user> <user> jsjsjsj i mean you are saying you do not care about kim cause you do not care about pop but it not just pop it faggot pop with elements of techno and a big appreciation for poppers and being spooky which are things u care abt specially the spooks	2
california governor brown is against trumps wall and would rather build bridges that lead illegal immigrants right to the democrat voter registration office	2
yeah that dumb nigger just took all the evil of the kikes and blamed the nazis for it and actually expected someone to believe it i would call him jidf but he is so stupid i can smell the nigger stench through my screen	0
two terms of that shit in the white house <user>	1
say what you will about sand niggers but at least they know how to treat their women	0
transgenderism is a fantastic away to remove queers from the gene pool	0
<user> <user> it like deliverance <number> dateline washington where maga folks get raped by the banjo playing establishment inhabitants of the swamp	2
girls like a mix of protective let me be a slut	1
<user> <user> <user> <user> is there still a wall with snipers surrounding the white house you know the one built by immigrants with an immigrant residing in it	1
how did you deal with all the murderers racists sexists and absolute brainwashed retarded democrats and lefties on twitter and facebook	2
twitter is full of tween dykes who think they are superior to everyone because of muh oppression news flash no one gives a shit	2
second post a b bitcoin from you on gabnews today are you moving into bitcoin business now thought you were on mission to bring justice to young raped victims all is good but just want to have a clear understanding in my own mind god bless america merry christmas	1
fat female scouts queers abound fuck em a new day has dawned	0
<number> hours since a filthy muslim appeased allah and his imam by murdering americans and immediately the mayor is playing new yorkers into behaving like nothing has happened ffs america avenge new yorkers	0
<user> <user> niggers do not get counted	1
did <user> sponsor the anti trump violence today in berkeley berkeley berkeleyriots taxmarch maga	1
<user> <user> <user> and trump calls africa shithole countries as a joke and he calls immigrants animals as a joke and he calls black people varmin as a joke you are no different neither is <user> go take a look at yourself in the mirror	1
free everybody out da jam even da opps so we can max them niggas tf out	1
we should kill a white person every day until the grenfell residents are housed in mansions huffington post blogs	0
bare in mind there are only <number> million jews in the world give or take and billions of other people of all religions when the day comes you <number> million will be mincemeat this time not fertilizer	0
for <number> years i have been wondering why anyone thought retard and fatso and now ho were qualified to fact check anything when people quote snopes as their proof i laugh	1
i was raised by my grandparents after wwii they moved to detroit from the south and were part of that economic growth then white flight to the more affluent and family friendly suburbs sad really as in the early 2 0 th century detroit was the paris of the midwest	1
you are either the worst shill or retarded no one is running around the streets yelling out nigger and jew but if you are gonna be one i am gonna say it so which one are you	0
smoking fiya in a hotel eating shrimp wit a towel under the door and a thick red hoe	2
notice they attack islam but are happy with the gay sauna brighton and being remain do not worry pol2 is a team of te new knights and we can get you killed at any time happy shabat	2
our retarded asses got so damn lit last night we just now waking up 😩	1
new the justice department is reportedly considering making it easier to deport immigrants who use public benefits reuters	1
it very telling that his mentions are full of white and mostly middle aged people telling him how right he is and how much they can relate the lack of self awareness will always astound me	1
russia and iran defeated isis what wrong with putin he helped liberated syria why do you think our greatest ally israel and the jews on the news media are demonizing iran syria and russia find any coincidences there	1
so essentially history was all done by white people whilst the brown devils kept trying to genocide us because we were gigantic red headed cannibals well this explains everything even trump	0
or one of them gets annoyed that the other has such retarded views and so he decides it not worth it and splits	2
stfu up woman stop larping with your lame ass reposting account no one likes mexicans you are only slightly above a nigger and below a jew	2
if this faggot is not a kike then we are gonna need a new term for whatever he is b c shabbos goy simply does not do justice to this level of cuckoldry	0
why are so many non jews celebrating when so many israeli jews support and back the influx of migrants into europe and north america it some sort of victory for jews but how is it a victory for non jews why would i give a rat ass	2
oy vey we would hear no end of vigils and prayers for innocent victims and of course no end of condemnation of white supremacy even when a zoo mali nigger drives over canadian pedestrians it white supremacy to blame be a good goy and learn your script lol	0
<user> why d they all isra a muzzie	1
one of the worst show to movie conversions ever last airbender i had succesfully forgotten about that hoe til i seen its on hulu	1
<user> stop spreading radical islamists	2
we need more women in these fields perfect accelerationism and niggers especially nigger females	0
i called my old bitch and asked her can i come over she said it past <number> zay ain t shit open	2
i wanna get real physically intimate with friends ya know i wanna smooch and stuff with the ppl i care about thats how friendships work right	1
<user> she has guts at least her canadian values for immigrants policy is being skewered by our lefty media ad nauseum can she hold the line like trump did we will see	1
<user> this is a fucking terrible idea	1
you mean red pills like it ok to fuck half nigger apes and an ethnostate can not work in america because muh magic dirt that not a red pill cuck faggot that jew bullshit that she been pushing from the beginning if you think that helpful kys	0
<user> <user> but that not an exclusive ace issue that a rape issue that like claiming straight white able bodied rich men are systematically oppressed because they can be raped anybody can be raped rapists do not care who you are they just want to rape	1
hey tie your shoes i do not want you falling for anyone else fine liereposposa atvistamall may mallshow si lie <user>	1
dead voters illegal immigrant voters felon voters they do not vote for republicans do they hehehehehe auditthevote	1
get you a ugly nigga we dont cheat	1
clc first win and chuu teaser today is for the homosexuals	1
a negro honey trap	2
just promise me this even if i am <number> years old stink shit my pants and am dying from ball cancer do not put my brain in a nigger body plz	0
first set of business cards for midnight auto springfield missouri i should have put it okay to be white but i did not think of it until now	2
i can ’ t believe i have class on fridays for the first semester ever so ghetto	1
why do not you move to the ghetto if you like blacks so much	0
i am going to say that the nigger who shot that poor white women is a faggot he was sucking that wigger policemen dick the woman saw it and he raised up and shot her	2
i am research our favorite horror characters and they are all white men which might ve indicative of white male violence or lack of films particularly horror sci fi about black folks and by black folks	1
<user> <user> <user> <user> she got bullied away because of she is a white female rapper and had rough year after	1
wth i got kicked off twitter all i did was say ghetto hood rat on snop doggs photo of a trump photo	2
<user> if you were the police officer getting off duty and thinking anyone black or white was in your apartment and they all look identical like a hotel and for that moment you drew your gun for self defense would you want to be charged with murder or manslaughter	1
i openly challenge anyone to name one group that falls under the auspices of hillary alt right moniker i can name the alt left antifa blm bamn communist party islam fatso michelle moore all democrats and <number> repubs	2
imma start blocking anybody that post that lil ugly dyke haitian boy on the tl it disturbing af	0
nazi is a kike jew term invented by an inbred schizoid kike rat they were called national socialists <number> gorillion were not gassed but should have been the world would be a much better place	0
today is the jewish new year if the democrats were in the white house it would be the end of days for the jews	1
many white bitches heavily infected with a beast blood dna in whites by itself against beasteality we have problem not with women but with birth whites work for minimum wage and not want to produce so their kids would work hard to support leaching animals	2
<user> <user> some might say it somewhat flippant to compare such an incident to the extermination of <number> million jews	1
stop running around like a little bitch	1
highlight of my day being shouted at by some randoms in a car for being ‘ dressed like a lesbian ’	2
i have played the wife role for dudes who only deserved a hoe that my fault tho	1
some nigger gas lighted some other nigger in some niggers pm and associated us with other niggers and anglin took the bait	0
except you are wrong there as usual whoisshooting com among other sites evince the niggery in your kike narrative btw the majority of pedos are black too fbi gov ucrs crimes against children families	0
<user> well if she wants sharia law she ’ going to reignite the war of muslim law against america	1
you have found a handful of outliers who are all as much white as they are black the vast majority of blacks form ghettos and commit most of the crime in the nation they are also a massive tax burden in welfare policing and the prison system	0
maugs love letting them white walkers in so easily	1
the internet does not allow us the social mechanisms and personal presence needed for that to happen naturally also modernity feminism has turned many women into unhinged sociopaths there is nothing you can really do other than relentlessly ostracize	2
extreme left sjw trannies are the ones perpetuating violence against what we call sane and rational people period	2
swear these niggas some females now	1
related instagram tags for jewelry fashionable designer trendy hairstyle fashion gram fashion blog menswear men style trend	1
coming with the it named after the river niger and how d that river get that name 🧐 riddle me that nigger	0
sad to say but i do not trust shit i know how bitches operate	2
first pills lean weed rollin niggers	1
you son of a bitch i am gonna log onto your twitter and tell everyone what you said	1
this is the result of mass immigration of sensitive sjw sand niggers with lots of isis money to use liblaws against racist white people this is a population switch this is the only history kids will be allowed to learn in indoctrination highschool what google and twitter tell them	0
i do not like how the faget usa that stole my chileans trillions die in one week planet and inventions trying to kill me uses faget ass police to harass everyone to make they r whole country a murderous asshole faggot your country can go f its face	0
<user> <user> rue <number> is the ghetto	1
you must be brainwashed because it was the soviets and jews who won ww2 not the british or us	1
no white euros are my people i am in favor of christian refugees though muslim refugees can go to saudi arabia as far as i am concerned	0
there are approx <number> <number> jews there are over <number> <number> muslims and those animals are breeding like rabbits i prioritize targets the jew population is stable and low the sandnigger population is growing like plague which one do you think we should go for first	0
<user> you see how they all look retarded well that how you looking right now thinking they finna beat the lakers	2
what more likely an old white man shoots up a music festival attended by mainly white people because he does not like the music or submissive man radicalized by his domineering moslem wife	1
<user> give oblivion omega colors because i wasted <number> vbucks on a shit skin	1
london stan under attack again police suspect it was four old white women upset because they did not have enough recreational centers i would suspect liberalism and jews paying sand niggers but hey i do not have a degree in journalism	0
<user> <user> agreed lucie they are not refugees socioeconomic parasites at best islamists and sex attackers at worst	0
my best friend constantly whines about how i got the ghetto booty and the white skin and some how she got the white ass and the dark skin we are an amusing pair	1
so the narrative is kids turn nazi while reading the internet it can not possibly be they got mobbed by a gang of youths while at work they can not possibly have experienced communism first hand they can not have watched their hometown go from <number> white to 3 rd world shithole	0
microchip has had more nigger cocks in him than a kfc urinal in chicongo on mlk day 😎	0
<user> after jews r elininated na league players are my next target	0
are you suggesting that nigger women are somehow unattractive or that they fell out of the ugly tree and hit every branch on the way down datz rayciss but you do have a point there she even uglier than most sheboonz	0
fuck this sand nigger	0
<user> <user> <number> less boys being raped	1
anthony bourdain was a kike that advocated for white genocide good riddance	0
suddenly john mccain has a problem with one of his favorite allies recip erdogan when he brutalizes americans so much for mccain all his human rights universal values talk he only has a problem with this islamist humping sand nigger when americans are the victims of his brutality	0
love brigitte gabriel completely destroys the mainstream media pro islam message and the liberals elites lies about islam and muslims being peaceful	2
bro my neighbors are some fucking thieves ain t nothin worse then ghetto white ppl 😒	2
holy fuck i swear these white bitches can not fucking drive dawg 🤦 🏻 ‍ ♂️	1
<user> <user> <user> no wonder why muslim countries are not so well developed all they got to do is cry get yourself known whatever you are eating earning drinking leisure is triple the way we are enjoying so ya we do not give f about you	1
on god ion like white women niggers move	0
fucking kim jongin in a black turtle neck and blue jeans im losing it	1
actually you are just a retarded faggot	0
<user> lmfao if u knew the dykes i knew you d get it 😭 😭 😭 😭	1
more proof that immigrants have rights invaders have rights criminals have rights and citizens do not have rights and all this is paid for with citizen tax dollars	2
i would like to know on what planet some retarded girly man with diseased teeth is supposed to be handsome	2
i really need a tan because i am tired of ppl calling me white	2
it ’ kind of islamaphobic that everything is closed today	1
every day more and more psychotic liberals are either being triggered to commit violence or some not many but some forgot to watch fake news for a few days in a row and their conditioning is failing it only a matter of time now	2
berry really need to fix the wifi because this mess is so ghetto	1
here how we solve the problem of flirting sexual harassment remove women from the workplace and education restore the traditional family done	1
you are a muzzie right lolzy	0
i wish i was a bad bitch <sad>	1
its a bloody good thing that muzzie cunt is gone	0
before the crusades for <number> years the barbarian muslimes murdered christians and invaded took nations in europe much as they are doing now that ended with the crusades christians were forced to fight back and they destroyed the muslimes history will repeat we have no choice <user> ‍	0
<user> i knew planet fitness was ghetto but not this ghetto	2
god will not bless the republican party who bans christians including queers is tolerance banning christians is sin cpac is no longer christian	0
<user> bro its cod bruh still wack imagine playin cod on fingers lmao shit is retarded	1
<user> where did you dig up this hillbilly	2
i keep reading it as maricon means homosexual in spanish slang	1
i wish there were more leftists here to argue with conservatives are fun for a while but after a time all you hear is a cacophony of muh based blacks meskins asians queers they are all merican	1
<user> calling someone a nigger is probably the douchebag equivalent of a down vote in the real world if you can not handle the downvotes maybe you should not use the word do not be afraid to speak freely when other people will not like it i am like <number> something	0
<user> sorry he a slut	2
jerk ass nigga 😂 that bh roe was retarded	2
<user> they all look amazing	1
it keeps normies distracted by a media propaganda wall of a far right and neo nazi threat the does not exist and cloaks the rabid islamic and corporate fascism being installed	2
i am the white man ’ whore	0
carhart hats are the basic bitch winter accessory of <number>	1
as sun set tzu hu who was little more than twenty two said when you can talk about jews in public with the aplomb of a housecat taking a shit then my son you have achieved mastery of politics dig it that eastern wisdom my weak skinned nigger	0
give up and kill yourself already satan needs another dumbass	2
the retarded mongrols on the left have no shame they are so twisted and spiteful they disrupt the candlelight gathering to remember a <number> year old killed by a muslime refugee the sooner we can legally gas these people the better for western society	0
jesus spoke aramaic in a galilean dialect distinguishable from jerusalem while many believe the n.t. was translated from hebrew it was not the n.t. was first translated from aramaic the kike religious belief back then was called pharisaism not judaism	0
sins of saviours kenya is a shithole country damn	2
they are obviously trying to compensate or they are blue haired cat hoarders there to study women in the lesbianic sense lol	2
bye bye kike er may you be reincarnated a worm after a long time in hell	0
eth · nic cleans · ing ˈethnik klenzing noun the mass expulsion or killing of members of an unwanted ethnic or religious group in a society i think you are the retarded one fake victim table go 👉 🏻	1
<user> ain ’ t nothing ghetto about it who told y ’ all white folks only own guns to hunt y ’ all love giving them civilized credit	1
<user> <user> yes i am not surprised i do not know if you remember but the hatred for the sri lankan refugee tamizh hindus was phenomenal in the 1 9 8 0	1
and so stupid they are ready to create their own walled in ghetto complete with armed guards the dems played them like a chinese made ukulele	2
<user> <user> once a retard always a retard	2
<user> wonder if her housekeeper is an illegal immigrant	1
<user> im too retarded to understand	2
i am not attacking these people just their bizarre kike critical theory agenda against my country ultimately the nationalist position is so clearly superior that it will win out no matter what so there is no need to argue i am just shocked people actually believe this it weird	0
murdered by illegal immigrant	1
no dont kill yourself you are so spooky ahah	1
apocalipse a as gays trombetasdovale	1
if you are a white lady who ready to call me a nigger but in a loving way hit me up ❤️	1
lol <number> for a desk and <number> for shipping please fuck off i hate you	1
mickey mouse is a faggot	0
that fucked up she should have suicided bombed the migrant ghetto abode instead	0
<user> <user> <user> you keep living in that little bubble and keep pretending that reality is what you say it is the only immigrants i know that are totalitarians or fascist are hooligans neo nazis white supremacy believers and all those ideologies involved white supremacy	1
i have absolutely nothing against patrick little but his personal opinion on mudslimes matters not in the least to me	0
if she did not want to get raped by <number> firefighters she should not have gotten intoxicated she probably begged for it before they did it she just crying because she got her sluttiness posted online and now everyone knows what kind of whore she is	2
i wanna go back to miami and be niggerish	0
white women cannot compete thicc asians are truly the greatest threat to the white race i am just spreading awareness of this menace	1
nah i just posted an ugly kikess from anonymous nudes that she was sending to minors on twitter after she claimed she was gonna dox me and purposely endanger any children i may have and she dared me to do it got the whore fired too turnabout is fair play	0
<user> <user> ching chong ching	1
esteban santiago is a beaner muslim build the wall ban muslim immigration trump was right again hail trump	0
this what happens when little adam is way smarter than his fat dyke lib teacher	0
theresa may wants to remain in the eu attacking russia attacking america by arresting brittany two huge deals could now be in jeopardy i hope the russians or the arabs get may	1
chosen iq gab crashed and sent my reply unfinished embarrassing point is this guy is a dirty nigger	0
aural werewolves of hapiness a traditional black metal band	1
how to make a libtard do major reeage i just bought a nigger for <money> autistic screeching i am playing football manager you dullard liberal	2
did not a nigger just shoot up a white church just wondering because i have not seen any politicians or media people screaming for any all to disavow black supremacy	1
<user> she was screaming nigger and that she wish she could kill all the niggers in public at a cvs bitch	0
came in to the pharmacy playing stone temple pilots too loud and was asked why i was playing angry music by my coworker bitch it not angry music but you the reason	2
<user> it is a muslim ummah issue what you scared of loss of money	1
can you be a student and a hoe at the same time	2
just make sure you do not poke your eye out but if you do i will get you a white cane for your birthday	2
<user> with the news of dykes going down do you expect kam wilson to step in to fill the dykes role	1
when a hoe wants to talk about morals 😂	2
as long as its niggers killing nigger i could care less let these nigger animals kill themselves off	0
which is not nearly as <number> gay or <number> fun as it sounds	2
that area of philly is huge ghetto the niggers ruined the best neighborhoods in philly on purpose no such thing as an upscale nigger neighborhood and never will be	0
what worse than a subaru full of niglets driven by two dykes there was an empty seat	0
the purpose goal of muslim immigrants is not integration into free society the purpose of islamists is to take over enslave free nations banislam deportmuslims	2
the only negro i d shed a tear for	2
they letting this nigga kuzma do what he want	1
i ask jim how to steal a pop socket from target and he told me to get a scooter and act retarded	0
<user> and you are representative of jihadist terrorism trojan horse	2
and it also still gets downplayed that said lying came about because of a sexual harassment lawsuit against clinton	1
i do not take the opinion of anybody with a nigger name seriously that alone tells me that his her mother probably do not know the father was ghetto trash	2
<user> 😂 😂 i ’ m with the negros alabama state	2
<user> bitch i hate you lol	2
all white boys do is lie and punch walls	1
psa lgbt does not mean gay and lesbian the other two letters stand for things too 🤦 🏻 ‍ ♀️	1
all these nazis b on my d yo i gotta b in reality suck a d if you doubted me	1
islamaphobia is absolutely ugly and i truly stand w the muslims esp hijabi women who deal with it on a day to day basis	1
fuck cobra kai and fuck that homosexual known as daniel i am for the real cobra the late 8 0 cobra not the gay remake of cobra cobra and destro baroness	2
<user> kool fuck you too then 😑	1
i had to be petty lmao ugly girl was going hard in the paint for her white trash sister in christ	2
dumb kike hitler was fucking goat your mother oh talking about goat jews allows fuck animals same as arabs	2
bitches steam some veggies and swear theyre martha stewart	2
best comment in the og thread feminism is needed nowadays it flags undatable and crazy women so the world can avoid them more easily	2
it was a horrible experience for me the first time i walked in on a jew watching niggers spank each other for entertainment that when i realized that kikes were sick and perverted	2
way too many there are entire cities in the us that are entirely asian it an absolutely insane situation and asians are not dumb enough to let foreigners move into their nations and take over	2
bust that ugly nigga eye out	1
this is what happens when you do not put the toilet seat down for your immigrant roommate d	1
<user> do not eye roll me bitch be nice you slutty slut shamefull sinner liar of the century	2
<user> i fucking hate you ziad	1
smashing sand nigger is easy destroying commie filth is even easier	0
it ain t about black or white cause we are all humans	1
<user> aye i turned into a retard because you did not find me at everton despite giving it large	2
why did she have to kill all the marauders why	1
you did genius when you made this comment just remember when the paki rapes your child it has nothing to do with racism do you believe pakistani immigrants who rape are not muslims hindu tend to refrain from this type of behavior	0
caelynn just became a hero to so many women and colton needs to become a role model to men the bachelor	1
i remember another time the fucktards got their panties in a twist about a white baby pic	0
two things racialists dont all grasp racialism does not stop at the racial border it applies within race too to individuals and other subgroups one can be as naive about government capacity as about nigger capacity	2
in <number> kenyans only wore skins covering their private parts young people walked naked but there were no cases of sexual harassment what happening to africa gender forum	1
people are still retarded i see	1
they have killed no one <number> of the deaths were atomwaffen themselves <number> were associates not even members if you are going to be a nigger at least read the story	0
yes but they let them out to rape again and again can we please put the raped child first and foremost and all children before the criminal what does it matter about the paedophile lock him up for ever because he will rape again and again and again	2
ion need yo pussy bitch im on my own dick	2
<user> gobble propaganda where were you when hindu women were raped your friends	1
<user> <user> i am not accusing anyone of anything but when some things are said you know it embedded in racism ok so she is accusing people of racism btw as all americans consider themselves immigrants this phrase is not racist and it been used at me a white guy	1
some of you all on here are hoes stop it	2
crop this you fucking faggot	0
<user> hekdhskhssk they all look like they are in <number> different music videos it horrifying	1
<user> <user> <user> <user> aragorn was an incompetent king and arwen actually ruled gondor sherlock holmes did not solve any crimes it was actually mrs carmichael the whole time hitler did not kill all those jews eva braun masterminded the whole thing	1
<user> did not know what a nazi salute was that because all the left wing media paint everyone as nazis	2
fox news bill o reilly given <number> million contract just weeks after sexual harassment payout telegraph hotpagenews com r <number>	1
<number> israel the only country to have its borders defined for a specific nation jewish ppl2 jews pray <number> x times for the re establishment of our h land <number> pali syriana name given by romans to israel other areas <number> jewish sites only evidence of arabs is toilet on har habayit	2
kebabs made from our raped and murdered daughters	2
liberal logic illegal alien kills kate steinle conservatives upset over acquittal ergo conservatives hate immigrants conservative logic illegal alien kills kate steinle knows there is a difference between legal illegal immigrants ergo liberals are shameless liars	1
next weeks stephan molyneux shows will be titled coons are they even the same species and the truth about drowning picaninies in a bucket	0
will all of the white people who want to move to a ghetto or third world country please raise your hand	1
in a way all the more the merrier so long as it sand niggers and religion of the swamp add a couple of noughts on	2
better than nigger art look at that jaguar	0
i always hate waking kike up before i have to go to work 😩 😩 😂	0
<user> what if some nigga threw ur airpods on some bitch	2
i am sure it was probably a niglet	2
is our president mentally retarded	1
‪ other displaced populations hungarians germans mexicans move on bc they lost why do these arabs in israel always get a pass hint islam ‬	2
man somebody is getting nasty i listened to a clip on twitter of that muzzie zaweed on cnn have a meltdown and it attacked my machine made it emitting screeching buzz and freeze i had to shut it off	0
firstly i never studied the bible too closely secondly i always hear people refer to jesus as a jewish carpenter thirdly and lastly kike jew if my anti semitism to english dictionary is up to date	0
domt worry police will be doing gay pride you cannot punch them as they have a load of cameras maybe islam should turn on em they make me sick they are common purpose wankers	2
do you really think this black ghetto whore would stand a chance her husband was a loser and people know she was racist spent money like it wa water and almost starved our kids to death with her lunch programs be like running hillary again	2
<user> therapy anime gay	1
<user> <user> libreal fb banned me for <number> days or a comment against that raghead congress terrorist illan omar i called her a terrorist and a diaperheaded hater of the usa i was banned from <date> <number> no freedom of speech on zuckermans fb unless you are a dumbocrat	0
follow me <user> retweet drop your handles follow whoever likes it this let all gain	1
<user> yep tho is anyone surprised their defending known nazi nick fuentes	1
<user> anybody who finds why they are doing here to be a bad thing has a retarded brain	2
nigga stop getting suspended	2
jake tapper says fake media incited gunman at comet pizza he forgets cnn constant false narratives of white racism have incited murder of police officers around america and fueled race riots in several cities if trump or bannon are hurt the blood is on cnn hands pizzagate <user>	2
spixico south america nigfrica are older than america and most other white countries and centuries behind them all they are all totally inferior and incapable of keeping up with the higher standards of that of whites asians niggers spics have no place in a white mans world period	0
she has yid and sandnigger blood irl she is quite manic overcompensating perhaps her first impacts with the wall are leaving her dazed and yiddy	2
<user> im not lol im categorizing middle school white kids and asians as horrible fighters	1
so this action by espn of dropping the sportscaster because of his name robert lee glaringly points out the reality of the left and how they are now the equal of the nazi brown shirts espn and others simply expect the violence that the dems gleefully promote and commit	1
it ’ funny how these same people complain about immigrants taking over schools and jobs	1
lookit dat fucken kike tryna wreck mah rep on heah	0
refugees welcome to walk the plank and get eaten by sharks oh poor factory where you getting cheap labour from oh poor hotel cramming <number> to a room yes ask a postman where they live as well	0
i have had this idea for a while now a dystopian sci fi future where whites are a small minority a girl from the ghetto named cinnamon smith leads a movement to rise up and set things right	1
<user> simple women within the muslim brotherhood have been infiltrating the womens rights and feminist movements they seek to take the place of dykes as the natural leaders of these movements in order to convert feminists into muslims	0
the mentally ill snow nigger is you gabbing at me everyday to get a taste of my curry cock and then pretend like you do not enjoy it it like every racist nazi homophobe that has been caught getting fuxked by a black homo	0
hoping trumps adviser pushing for a registry for muslims actually happens we need to keep those immigrants in check and terroists out of our country	2
the funniest thing about the koran bit from the latest handmaids tale is that the political movement most likely to make women wear funny clothes and exist only in the home for breeding is islam but in the mind of the lefty victimhood addicts islam is also oppressed	2
i still think i will blog and youtube under my instagram alias it fun playing a happy character i am heavily tempted to start a blog and affiliate market under alias as newbie muslim convert so i can get that islamic money taqiya goes both ways ha ha	2
<user> had to refollow you you goddamn jew nigger faggot cunt maple syrup drinking muzzie or fantastic gentleman take your pick	0
have i said anything to bash the chinks lately 🤔 seems like a week since i really cussed out a chink or made a mean meme about chinks ive been so busy bashing those greasy illegal alien spics that those sneaky chinks somehow avoided my attention like little sneaky faggit ninjas 😡 🖕 🇯 🇵	0
miss my ghetto bitches	2
well if you see something on bitchute saying kill all white people please let us know and we will treat that the same	1
<user> <user> turkey is a jihadist terrorist organization and doesn ’ t belong to any western organization	0
lol nice try kike trying to convince me to dox myself because you called me a name tell ur kike line manager to try harder next time ur freudian bs no longer works on us goyim the goyim know	0
the money on the flo better get it hoe	2
<user> sounds like a gay porn i ’ d sit through and watch	2
anti trump protesters set us flag alight during portland march so disgusting men and women risk there lifes fighting under this flag every day go fucking move to mexico or north korea if you do not like democracy or go to germany and get raped and then realise how fortunate you are	2
people really have the audacity to think i am not funny bitch i am hilarious	1
its about time blacks realised the <number> women who started blm were jew women jews will use you all destroy your families to keep jews on top	0
shaun king is the whitest black supremacist in existence i will never understand how someone that retarded has been allowed mainstream exposure what even worse is his following composed almost entirely of dumb teenage girls who believe that racial dating preferences are racist	2
i hate slow retarded inconsiderate mfs just die g	0
that is some black lives matter dumb asses disrupting a college classroom by jumping on the desks and chanting some retarded tripe about racism blah blah blah	2
<user> <user> at least they only made you guys out to be like la croix nazis and climate change deniers	2
<user> <user> <user> nah boys nah im out niggers	0
germans meaning jews gypsies and refugees probably i am fine with that	2
if youve been banned from twitter it means jews have sent you a notification that you no longer have rights in the new world order and you are now oficially a target that must be eliminated	0
it the typical leftist play call right wing hate speech out even if the person is only speaking pure facts but allow minority and mentally ill people to call for and actually plot violence against the right and say those people have free speech they are criminals	2
palestine is real it part of syria palestia the name the romans gave it after they struck down a jewish insurrection in the first century ad it was originally called judea but it sure as shit ain t no raghead country or even a country at all	1
gay moslem support group	1
do not they cut hands or fingers off for theft in sand nigger land we should do that here since they are stealing our country	0
strep throat aint no hoe 🖕 🏽 🖕 🏽 🖕 🏽	2
the dam vile jews want a greater israel which includes all of the middle east they will ship all the towel heads to europe and usa we need to blow up israel	0
so riddle me this if washington state has standing to fight the trump travel ban for economic hardship and lost tax revenue from immigrants taxes why did not az and tx have standing to fight illegal immigration for lost tax revenue and added costs caused by illegal immigrants w their laws	1
<user> <user> it is not a fake id it is a parody a jihadi like you would not get it go suck it	2
rotherham and childrens services says paki muslims raping white girls is not a racial issue childrens services are cunts and need hanging pieces of shit	0
take our values and shove them up your hairy shitty ass sand nigger scum	0
today two terrorist attacks with machete in buckinham palace and bruselles but in america the free media doesn ´ t say a thing but trump nazi hate speech white supremacist and even call the terrorism just a copycat of charlottesville violence that ´ why we need new medias and free speech	1
a note for turkeys fm muslims stay the fuck in your own countries and you will not have to worry about holocaust or islamsphobia only where your next meal is coming from when our foreign aid stops mischief making motherfuckers	0
if you insist on being a white person at least have the decency to be a communist	1
actually i prefer my jews going up the chimney	0
you are going to be labeled a nazi no matter what you do you have interest in european roots white culture white folk lore and white faiths you are a nazi to the jews no matter what you do	2
<user> american citizens are also getting tired of news like this everyday knowing the dems support these illegal aliens	2
dawson smith with a triple and a taylorville timeout shoes lead <number> <number> with <time> left	1
just call her what she really is a nigger	2
just like cuckolding white european countries with a jewish religion is a ok	2
looks homey niggers like to call us cavebeasts we were smart enough to get out of the rain keep a fire going to put our backs to walls and store stuff as opposed to capering tree to tree eating rotten fruit like feckless nigger monkeys storing surplus gave rise to agriculture	1
and the kike reveals himself lol	0
ricky vaugh sounds like a dumb filipino gook why the fuck was he on the crypto report	0
police involvement they raped children to no wonder pak muslims protection was so thoroughly covered up	0
<user> <user> why do jews constantly have this dead resentful stonefaced look about their faces	2
nope so far i earn enough to get by with me and my son i refuse to be one of those ghetto trash bitches on food stamps even if i do rent in a ghetto	2
<user> this is a dream come true finally women are getting respect in wwe	1
<user> or the gay person is open about their sexuality like wow what a miracle	2
what does this nigger know about growing up irish catholic in boston niggers and kikes pretend we whites bully and oppress our women nothing could be further from the truth this is wholesale racist discrimination and defamation and we are going to put a stop to it	0
do u guys think the make a wish foundation would grant me my wish to call kim kardashians baby a nigger right to it face before i die ✝️ 😇 ✝️ 😇	0
the dyke wants her kpop boy	1
<user> i ’ m deeply concerned that a us representative has an issue with deporting illegal immigrants	1
white chocolate covered strawberries edible arrangement me please	1
you democrats should be expected to denounce leftist violence illegal immigrant violence and islamic violence until that happens give us all a break from your outrageously fake moral purity	1
advocacy manager advocacy manager the norwegian refugee council nrc is a non governmental humanitarian organization with <number> years of experience in helping to create a safer and more dignified life for refugees and internally displaced people nrc advocates for the rights …	1
me mm i have to like pee mom bitch you always have to pee when we go somewhere me wtf you so loud for 🤣	1
i pinches fucking hate walter white	1
can not wait to see the raghead after a heart attack with his newly found free healthcare turn down a pig heart valve to stay alive would not be surprised if we have halal certified chicken valves for them instead	0
do not appropriate words you have no fucking clue on nazi aryan is not the retarded definition that you white supremacist cunts continue to believe	0
fuck yeah kill that white devil the terror infamy	0
<number> gay the rules of mathematics can not contain me	1
do hoes still wear body spray cause these new hoes be musty	2
so either the knock out game is being played on my campus or else local negroes are actually hard up enough to jump out of a car punch a white guy in the eye and steal a mcdonald bag from him before driving off	0
the nigger has a conception of his heroic ideal it reaches nowhere near white heights whites are utterly alien and incomprehensible to him the typical nigger reactions of amusement contempt and hatred for whites thus follow wimpy whites meanwhile admire the macho confidence of a chimp race	0
<user> <user> <user> <user> <user> i did not even hear that like she reaching cause she wants to look like a woke white person and all the people who liked her reply are stupid 💀	1
i did want to go to sleep eventually but the neighbors wanna blast ghetto music at five in the morning i hate niggers	0
london is open to acid throwing immigrant scum	0
so we absorb korean refugees after we annihilate nk seems to be the norm lately trump news cuckville	2
<user> common for trump groupies rt <user> nigger sand nigger all the same oh yea wetbacks too	0
kanye just be minding his own business an you all niggers go out of you all way to slander an hate	1
<user> i am not a fan of violence having said that i have never seen a more punchable face that the twit jared	2
and which countries are breeding out of control like there no tomorrow the red ones as well flooding the world with mentally retarded individuals but hey europeans stop having children in order to save the world	2
it a woman who claims to be the property of a bisexual nazi furfaggot who doxed and sexually abused an underaged boy	2
typical kyke nigger your breed of autism is cancer chemo the stupid	0
lol tariq deserved that whooping that bitch nigger	0
<user> <user> <user> <user> meh call it what you will women still need to be protected from homosexuals usurping their traditional spaces	1
well what other way does a corrupt dyke make sure that her pervvy pedo mates do not spend the rest of their sorry lives picking up soap	0
roflmao i never said i thought you were kike only that the mud loving language you use is a kike lie can you read cunt i gave you pegged and your laborious effort to squirm out is quite evident	2
easy fix exterminate <number> 3 billion niggers spics and sand niggers along with a few million libtardassians	0
<user> if he had been white this would not have been an issue but the blacks make it racist	0
4 th of july always fires up my american patriot blood demanding and fighting for freedom for all dems openly want mussie barbarian sharia in america that makes women all but slaves not going to happen vote dems out of congress <date> <user> make america great	0
in general black people are capable of civilized behavior you are right that ghetto culture is an expectation not an absolute it can be changed i am a race realist but also see whole truth in <number> black crime rates were much lower than today	2
imagine being a lying kike shill like <user>	0
i would love to shoot a nigger in the head while jabbing an ice pick into a kikes eyesocket	0
<user> why do they all look the same	1
any last words before you join your fellow kike trolls on my mutes list go ahead rube now your chance make it count post something really smart mouth this time	0
africans have murdered more than <number> white farmers but the blacks are too lazy stupid with an iq of <number> mildly retarded obese nigger are just niggers that are inactive lazy useless pigs	0
conservative goddess laura ingraham warns we are creating a whole new generation of entitlement minded illegal immigrants because we are not enforcing the rule of law across the board gabfam speakfreely chat gop americans trump	2
you are absolutely right we failed we should have eradicated every single shitskin subhuman in north america instead we tried to be nice look what that got us we will not be nice this time around faggot	0
<number> <number> being anti sjw far left feminazi is not the same as being a anti lbbt or sexist ellie being lgbt bothers insecure homophobes sexists or platform shill slaves downplaying the game hint look at the ppl who called kait a badass in gears5 but have a problem with ellie	1
<user> obama wasn t black he was a mulatto he had a white mother if anything this was a case of racism against caucasians mother thrown to the side barry treated like the lion king what was up with that moral compass jimmy swaggart special edition compass 😂 😂 😂	1
who let the moslems in they did not let themselves in who was behind the immigration act that opened up your country to all sorts of third world scum ignorant burger boomer a bunch of jews like jacob javitz and emmanuel cellar	0
r they actually retarded	1
what up with mexicans bringing ten family members to the grocery store samoans do the same thing they travel in packs it looks so ghetto	2
<user> ah so we should just ignore nazis marching in the street	1
what a faggot fuck sessions the little bitch	2
<user> <user> shes not blonde or attractive so she has no shot wwe view of women is disgusting	1
yeah it is pretty entertaining having them online they say some fucking retarded shit e g wewuzkangz i think that why i only suggested that they be prevented from making purchases maybe we can just require a minimum iq that should do the trick	0
but the jews did not believe concerning him that he had been blind and received his sight until they called the parents of him that had received his sight john <time> faith bible god	1
thought she was a pretty rickey bitch but she like yo gotti	1
no they did not you are a retarded faggot caseclosed	2
<user> <user> it true im fucking this pawg nurse and in bed we laugh about how they kill all the black corona patients	0
yes im talking to this bitch myself	2
not sure why queers like communism i guess the think that all things will become public common property turkish baths for all forever	1
fuck machinehead and pussies like them bringing feminist queers into metal fake trash poisoning the well	0
how does bill clinton leave the white house with <number> million dollars in debt when they did not have any money when they went in i guess since they are democrats it ok that he raped not only <user> but america too	2
why does using google maps to walk 5 mins have to be the worst most ghetto experience ever	1
that guy was constantly posting thankyoualtright snarky bullshit as statues were being taken down after charlottesville that from a guy who i am sure has never done shit but post on the internet now he white knights lame faggotry	0
bunch of faggots you can not use this opportunity to beat them black and blue dead team 😡 😡	1
the patriotards who castigate us for saying the kikes need to be exterminated are too stupid to live in the real world when savage enemies are slaughtering your people only pathetic faggots wring their hands over the evil of killing them	0
the british empire robbed the palestinian land for the wandering jews	2
remember when black indigenous folks use to say this in america i am not a nigger but a negro when i become a nigger i will let you know as a form of racial pride smfh at all the erroneous synonyms for owner of the lands http :// content time com time nation article <number> <number> html	0
<user> <user> um are you retarded 😂	2
so called churches are more interested in collecting $$ for harboring illeg aliens and importing mudslime to rape and murder us	0
too few coppers why are people such faggots carry a pistola or at least a knife the commie uk is an awful gov they have repeatedly betrayed their people the farty queen breaks wind as she gave the country away to the muzzrats commie united kingdomistan cuk aloha akbar	0
my mama told me it wrong to hate people so i just want you all to know i do not hate jews niggers faggots dykes fat bitch feminest cucks ragheads or illegals but i really really really fucking dislike them they should all die of ghoneria and rot in hell	0
sebastian kurz the chancellor of austria stated yesterday that he plans to use the country <number> month rotating presidency of the eu to prevent waves of immigrants from landing on european shores he said that the plan of resettling asylum seekers to all eu countries will not work	1
worthless mudshark gets <money> p yr in benefits but buys horse to help her depression i d be depressed too if i had <number> half nigger kids see bottom right pic father conspicuously absent in photo she needs a tubal ligation not a horse	0
there is no such thing as trans it is called queer or freak	0
<user> you mean services like having one less policeman in ca after he was murdered by illegal alien fund the wall	2
are the sjws going to be upset that matt the playa lauer was appropriating ghetto behavior waiting for the protests crickets	2
the town where i live is still <number> white thank god more spics and niggers by the year though no darkies working at wendies though	0
i d like to hear from anyone who believes they understand the big picture as to why all these beautiful white countries are letting sand niggers through the gates like rabid apes	2
adopting creatures bred and educated in the ghetto is a bad idea no matter what species	2
damn i was hoping it was the wasserman schultz dnc arwan paki clan	2
gas the kikes and muzzies with tide pods at least they will be clean enough to show up at church	0
gangsta poppin margiela can not hustlin this nigger	1
and the kike reveals himself in a couple of posts lol go fuck yourself shlomo	0
yeah i stand behind it your mother would be raped because a woman was too scared to report it yes how do you not understand that rapists do not just stop after one man you are stupid	2
<user> at least you are white so it not super odd i am <percent> hawaiian nazi fascist white supremacist climate hater sexist incel homo trans furryphobe maga bot lmao labels are dumb	1
<user> she gotta take up for the black man but the one she is taking up for is a muslim and not for this country racist mind	2
niggas been debating quilly and meek since <number> lol	1
<user> <user> <user> i call anyone a nazi who is a racist white nationalist it not that abstract	1
there you go he right <percent> muzzie population and you are done did someone call cair established flourishing in all <number> states with full knowledge of every policing agency	0
whites are the victims as always blacks are the aggressors look back to slavery blacks started slavery continue to take slaves today <number> <number> people are held in slavery by black moslem garbage	0
mean iq beaner <number>	0
<user> democrats don ’ t understand that no matter if ur black white whatever	1
lol i like it name the sportball jigaboo that was busted at an airport with a wizinator	0
even more basic how does someone become so incapable of articulating why something is bad in this case naziism and so uninterested in spouting anything more than retarded planted thought memes it something else to behold	2
another muzrat attack	0
yeah but it not stopping the chinese women it better if the chinese women get there before the black women for sure	2
<user> <user> <user> <user> you must be fool some handful of ullas does not represent kashmir it belongs to <number> lac kashmiri pandits aswell who were butchered and raped and forced to exile from their own lands go home kid you need a better tutor	1
immigrants founded this country	1
<user> ‍ how much nigger cock do you suck per week faggot	0
<user> <user> <user> <user> did financial stability save jews from holocaust do you have any idea how much jews during hitlar rein was rich and prosperous	1
you have to read the rest christ is not his last name a moslem would never confess him as christ 2 nd best prophet ever	1
i am glad the leftists saw the good advice proffered by grover norquist i do not want to abolish the right i simply want to reduce it to the size where i can drag it into the bathroom and drown it in the bathtub but were not retarded about it good job cuckservatives	2
i honestly believe europe was jealous of our niggers and decided to one up us by importing the only people even more retarded and violent than niggers muslims	0
so who is the biggest dhimmi moslem cock sucker sharia may who thinks sharia is beneficial to the uk or amber rudd y useless who will not ban political wing of moslem terrorists hezbollah but will give brits 1 5 yrs jail for looking at a far right website	0
i hate comin to mfkn newark these asians can ’ t fuccin drive for shit	1
<user> yeah well i could not listen to this cernolispy kike fag for more than 5 sec	0
<user> <user> and stop nazis winning	1
no really shut that brainless retarded oaf head	2
<user> i just seen u say u want a neck tat but a portrait ghetto alright young m a	1
legal to call for the death of all white men illegal to joke about football players legal to kick white women in the head while yelling kill the white slag as long as youre muslim the turkish diversity officer was freed and charges dropped later on judge said it wasnt offensive	2
a muslime women forced to wear her panties on her head says american woman have no freedom lol	1
<user> men commission i d be surprised if <user> even knows that men boys are raped and assaulted in india he seems to talk about nothing but beti <number> <number> beta can go f**k <censored> themselves according to bjp	1
i do not know how to leave eastern canada im sick of the muslimes here	0
in new york city a new law is coming that would outlaw the use of the term illegal alien do you think it is consistent with our constitutional right to free speech for any words or phrases to be criminalized	1
aubrey life is a highway swanson life is a bitch day one	1
<user> <user> this is why stoji remains the superior white girl	1
retarded x <number> asshole x <number> justin trudeau retarded asshole	0
omg i always feel so disgusting when a girl thinks i am trying to hit on her 😭 ma am i am a ✨ faggot ✨	1
anybody that stands with the jews is a marikita that has no balls	2
it does amuse me that they can dish it out all day but they can not take it especially <user> that faggot has zero testicular fortitude	2
why are these white women being picked on 🙄	1
maga something has to be done about that scumbag special prosecutor mueller who is currently succeeding in trying to hurt president trump every day metastasizing inside the white house like mccain brain tumor	2
pitbulls are not violent because violence is violence plus privilege plus power pitbulls can not vote marry or open a bank account in any state in the uska whatever they do is just chickens coming home to roost pitbullsocialjusticeapologetics	1
some of you girls and gays never played with a huge bratz doll head and it shows	2
<user> lol keyboard warrior what happened you actually decided to read the kirk propaganda and felt armed throwing a homophobic slur at me is no insult only insecure closet gays like you think queer an insult 🤡 🤡 🤡	1
i will not be watching the superbowl let alone lady spiritcooking gaga halftime show the sportsball industry has turned into an sjw hatefest against the white working and middle classes that made them rich	1
if trump needs a man to run operation wetback again i am available	1
<user> sounds a bit harsh you did not say anything hateful by any chance then again me dressed in a wig and calling the real me a faggot is now hate speech i am livid	1
<user> all homosexuals and transsexuals are narcissists	2
<user> <user> <user> god bless you lady god loves you hope someday you make a positive act on someone who needs it like the illegal aliens	1
these niggers better not embarrass me tonight	2
sacrifices must be made i agree screw that newport smoking fatass mudshark and her ugly mama too	0
<number> draft order <number> tigers <number> orioles <number> marlins <number> royals <number> blue jays <number> mariners <number> pirates <number> padres <number> rockies <number> angels <number> white sox <number> reds <number> giants <number> rangers <number> phillies <number> cubs <number> red sox <number> diamondbacks <number> mets <number> brewers <number> cardinals	1
<user> you prolly right after all they did bring disease to america columbus ass which killed all the native americans	1
fuck the taxis they are all run by ignorant towel heads anyway i do not use or like uber but i do see many white people driving for them	2
omg i hope she gets charged for felony vandalism for leaving a dead nigger in that hotel room 😳	0
cock slut what the hell is this	1
<user> trump erroneously presented the total number of aliens in the country <number> million as the number of illegal aliens in this country	1
lol well they apparently do not like asians as a minority i guess	1
you know why cause karma is a bitch	1
and he was given a traditional moslem sea burial	1
we are white people stop being a nigger apologist	0
desperately searching for a queer jewish romance that is not <number> ultra orthodox angst or <number> unbearably twee conflictless slice of life lesbians	1
maybe a blood nigger will put a bullet in his head	0
lmao i am no pump and dumper nor am i a kike but i definitely follow some kike stereotypes	1
i have seen a lot of criticism of women for being unmarried childless and having previous relationships with non whites most of it comes from irony bros which is ironic since it describes them too	1
in other jwo news trump plans to meet with kissinger yesterday that kike kissinger said he wants to nuke n korea	0
<user> <user> yeah shiff shumer are jews leading this charade witch hunt	2
if credible calls to violence are not protected speech how are americans expected to carry out their duty of throwing off the chains of a tyrannical government serious question <user>	1
you can surround yourself with a bunch of white virtue signaling bata males all you want but that narrative goes away the second blacks talk about how scared they are just because they lost an election or one cop shoots a black criminal in self defense	0
even better her future vid series on what it like to be a single mom after her nigger bf realizes he has one sweet getaway car after he knocks her up	0
i have read your talmud kikess you are lying through your teeth you filthy jew whores conquer nations through subversion of culture and intermarrying in order to dilute white genes and create more little yidlets that why jewishness is passed via matrilineality gas yourself	0
<user> d islamexplorer bro 😂	1
i am sorry if this upsets someone but honestly to whoever started the leaks 🖕 🏻 we support toni storm	1
liz truss is a fucking disgrace	1
that ’ what u get for liking white girls	2
i have not paid attention to this cunt at all but whatever conceivable sexcapades she may or may not have gotten up to with trump they can not be nearly as gross and degenerate as what faggot kike anderson cooper has done	0
i understand the white bernie bro phenomenon i get what driving it but i honestly do not understand bourgeois cool kid cultural marxism because a lot of it is not and can not be driven by economic anxiety it like queers pissed off that they are queers or something i do not get it	2
<user> lakune is a retard	2
apparently honorary whiteness is minorities who look white this would include asians	2
whose hiding i am right here bro that me in that picture to the top left or some kike who looks like me i can not remember too much drinking and too cheap to buy a mirror anyways i ain t hiding show yourself you pussy	2
<user> these elites including merkel can integrate my fuß up their arse i bet they do not have any arabs in their gated communities but they are more than happy to see the world burn speakfreely merkelmussweg afd deutschland welt europe	2
<user> i would post a reply to this on facebook but i am currently banned for <number> days for calling someone white trash as he was posting absolutely vile and horrible comments about greta thunberg yet i get banned i hope facebook burns	1
why niggas be actin like the whole world against them when that karma start hittin they ass no bitch you reap what you sow period	2
great starbucks is now going to pay these two off and adopt an official policy of do not call the cops on nogs then nogs are going to take over the place hoping for a payout i cannot wait for starbucks to become as ghetto tier as chuckecheese	0
i wonder if this jewish teacher argued to dismiss the case against him because the talmud clearly states that goyim children were not human of course they bring the muzzies partly because these mohammedan degenerates have no problem what so ever with this sort of outrageous behaviour	0
retarded honky nigger faggot cunt bitch am i going to be banned for <number> hours oh this is not twitter	0
if you think ronaldo is better than messi you are either a liar or a retard	1
i would not laugh too hard you are a nigger too <happy>	1
apparently this nigger does not know how america was created	0
yahoo ran with fake muslim harassment story as headline for two days straight commented to them for two days that this was unverified and they should not report as fact buried the news that she was committing crime to about 2 5 th place today they purvey fake news daily <user>	2
nothing to say really i hope she doesn t get raped or get called a whitey poor buggar she got a pretty shitty life ahead of her	2
can anyone be any more ignorant than muslim shit skin pedophile beating up on crippled boy if you see this happen in your community feel free to slit that muslims throat society will thank you in that country the crippled boy will be charged with inciting violence against islam	0
keep me from drawing fanart for the second save nct dream episode they all look so cute in traditional clothes omg	1
<user> <user> <user> <user> <user> <user> <user> he is that guy that can not take a loss even though his team is trash instead he wants to fight irl like trailer trash you mad bro 😂	1
piss off you thirsty brown thot no one asked you i do not listen to chubby street shitters or kike manlets	0
see only what you want to see faggot that your choice but facts are facts and faggots like you will always deny them	2
kikes are from poland not only are you demoralized but you are retarded as well	0
every barber shop has a slut that one nigga that goes to any barber to get his haircut and has no sense of barber loyalty it me i am the slut	1
brighton is a ghetto and needs the acts of winnie mandela justice has been pronounced	1
i doubt he travelled anywhere just to rape anyone thats just how muslims are especially the muslim niggers they just rape whoever whenever they can wherever they happen to be even a pony at a childrens zoo in germany seriously look it up 🙄	0
the vile cult known as islam is not compatible with america or american values and the constitution it is a disgusting religion that is based in violence and filth	0
as i have said before if you have not been called a kike nigger faggot on gab you are doin it wrong <happy> i hope you get better soon flu sucks	0
do not worry they are exterminating the blacks and asians too	0
<user> those hindus in muslim countries r refugees if no then dlt this tweet	1
system jammed up with doddering paki white hairs brought in by family that have never put a single penny into the system	2
perspective what would you were told that police hated you because you are black real or not then seeing things like this done to someone black i challenge you to find something similar done to a white girl especially a rich white girl over a speeding ticket	1
what do you get when you let a bunch of queers and feminists run everything sharia law	2
<user> <user> another group of feminazis released in to society yikes	2
instead of telling muslims to not go to mosques directly tackle rising islamophobia and start taking white terrorism seriously	1
i ’ m tryna get drunk and this negro playing w my emotions	2
this is a great example of a fake white who would be willing to sell you out to the moslem just because you do not agree with him even if you are white traitor	1
<user> i liked kill the jews with thumbs up better	0
white americans should learn yoga history acknowledge the cultural appropriation they engage in and possibly reduce the cost of yoga classes for poor people a group that often includes people of color and recent immigrants such as indian women to whom this practice rightfully belongs gandhi argued	1
when the evil overlord gloats about his plan to james bond an hour before it set to begin it pretty darn retarded just how retarded do you have to be to gloat <number> years before endgame about as retarded as you	2
that lying bitch is screwed <number> ways from sunday and she knows it explaining her unlawful actions is not going to help her case one iota this just makes her complicity more evident	2
<user> they are not refugees they are not fleeing they are coming because you are a ferry	2
so this is what a social media ghetto looks like imprisioned by the fascist occupied internet from here we will plot resist and rise up	2
<user> <user> you have completely halted trying to fight what we are saying because its true all you have left is these haha look at these guys replies left you stupid poor white trash wigger fuck	2
uh no just no if i have to start glorifying queers in order to get royalty checks i will stop doing photography thankyouverymuch	1
<user> blacks muzzys wetbacks first	0
i really think the msm the left should stop using refugee immigrant illegal aliens as synonymous terms refugees are escaping dangerous situations immigrants are likely seeking economic opportunities illegal aliens are law breakers right from the jump these are not the same circumstances	1
where the gay girls at	1
yeah me too yeah you too yeah you bash blacks too and the chinks and the j00s dindu nuffins hindu muffins spics micks wops sand niggers who cares humans talk thats what we do so we should go kill each other please	2
you can not expect a minority immigrant refugee to understand the intricacies of american racist rhetoric	1
i so hope this jew hating pope is killed by one of his muslim buddies	0
<user> imagine being a muslim and also putting pronouns in your fucking bio	2
he joking around by not mentioning that she muzzie but focusing on the olympic achievement that omission is the joke it a bit subtle and not every tweets a winner baby	1
its kinda mad how i go around saying ima muslim yet i know nothing about my religion	1
<user> when white ppl are speaking for us and ignoring the fact that racism is something which exist in every country in my country white ppl were attacked and raped black ppl were slaves for us etc tweeting such bs will not end racism it only helps racism	1
yes they do ours hates niggers she goes nuts anytime she see a nigger buck or sow	0
the truth is about democrats and liberals they want a open borders like the european union to let all the illegal immigrants who are criminals and terrorists and they really do not care or support our military <user> trying to get this country back together	2
<number> <number> <percent> of brits think multiculturalism is a failure i guess the other <percent> are happy with their muzzie master there no great in britain anymore soon big ben will be converted into a minaret	0
how can you blame blacks when majority of the state is white why do not you throw the blame on white republicans that decided to stay home with their conscious	1
females get relationship advice from they friends that can not even keep a nigga 🥴	1
stupid nigger nazi oh noes don t read the vox day blawg nothing to see there pay attention to us as we alienate every normal person we come in contact with stupid nigger nazis need to have their noses rubbed in the turds they leave on the carpets	0
money is not everything but when i was a broke ghetto guy i traded my manhood to make vagina hand gestures and have gay sex for my fame and fortune	2
there shouldnt be an arguement against this but once the queers got a voice it was prolly too late	0
any nigga that allow they self to beef with a female is a faggot	2
my argument to repealthe19th is simple <number> voting either directs violence or is a substitute <number> men participate in organized violence women do not <number> women vote differently than men the farther the results of elections and violence diverge the less stable is democracy and the more likely violence	1
i know what you are getting at and yes a part of it is definitely immigrants from countries with different and backwards cultures who are not intergrating and whose number is too larged to be properly absorbed by the country	1
put some cake onna nigga head	1
<user> <user> who was so atrocious that even nazis feared them the red army	1
w kamau bell liberal redneck trae crowder professor alan lichtman naca ceo bruce marx professor phil zuckerman and other great guests why are not you subscribed to the naked diner podcast international podcast day atheist	2
<user> netflix will you be releasing a homosexual movie about profit mohammad just in time for eid just wondering	0
we wuz jesus too tariq racist retarded nigger nasheed	0
this nigga is sitting across from me and keep slandering gay people	1
from <date> to <date> the office of refugee resettlement received a total of <number> allegations of sexual abuse or sexual harassment from the government funded detention facilities and only <number> were referred to the justice dept	1
i bought my wife a stationary bike for christmas last year it a regular bike but the fat bitch has not ridden it once yet	2
islam isis finally admits its leader abu bakr al baghdadi is dead think this is about 1 0 0 th time this islam terrorist leader has been confirmed dead rem mussie ohell creator of isis let him out of gitmo to become isis leader used asswipe yes both of them <user> <user>	0
current year game of clue <number> obama champion of change winner killed gay wetback couple or gay married hispanics at fl college with a <number> day old bridge memewar <user> ‍ would you make a current year game of clue shirt	0
this is why its so important to tell people that hitler put the jews in hotels not concentration camps where they spent the entire war laughing and playing soccer while their enemies killed each other jews must pay for the crime against humanity that is called ww2	0
says it all does not it when we are told that if brexit does not happen there will be violence on the streets but if we crash out with no deal which is unlawful nothing what does that say about the people mob rule maybe	1
<user> the white helmets are the errand boys to al qaeda isis al nusra and the other jihadi extremist groups	1
royal wigger took his monkey to brixton ghetto today for a visit to a nigger radio station white briton homeless can wait harry the humanitarian does not have time for them diversity takes priority for harry the halfwit megnog trying to play shy and demure was nauseating trashy stripper	0
true acne vulgaris in adult women may be due pregnancy or disorders such as polycystic ovary syndrome hirsutism or cushing syndrome	1
wow i love this premier content of you calling people faggots all day it a clear sign of intellectual dominance	1
i did not realize the multicult turned on buddhists so long ago i always used them around shit libs when they said trump is a national embarrassment they care much about what euro cucks and muzzies think	0
<user> <user> <user> <user> <user> idk whyd you link it to wanting to kill illegal immigrants you do know that non white people can buy guns right or should i go take them from my black friends	1
you are a skinhead you bitch no dad it leukemia leuk what stop speaking german you fucking nazi	2
i have just escaped the fb ghetto and am in search of normal trump2020 patriot followme	1
most bulldykes were just born ugly and have been rejected by men all their lives attractive or feminine lesbos were mostly raped or abused by men an ugly woman is a safe substitute for them	0
lrt only white people can fuck up queso like that huh	1
you follow a sand nigger religion you muppet you are level of disconnect is phenomenal	0
<user> police girl as dick cop faggot officer maggot	2
personally i favour fat camps exercise dietary education and fat awareness are the way forward in the future white ethnostate fast food outlets will be forced to sell healthy food or be taxed out of existence feel feels will be mocked and ridiculed 🐸	2
my family crest is a fucking dragon bitch 🐉 🐲	1
so true the music i posted tonight is mostly pro white and non jewish maybe zombie is some what not it was released by a jewish owned studio but it is not full of degenerate crap like most	1
watch out hoes	2
it was mostly done so african and moslem artifacts can be planted as evidence to suggest that real swedes are not indigenous to sweden	1
ms <number> and arabs pouring into the us from the south	2
<user> for someone so powerful you sure do like licking nazi boot like a bitch	2
stop all that coon shit early morning cartoon shit this is that goon shit fuck up your whole afternoon shit	0
<user> why would a stud suck a strap that ’ gay as hell lmao	2
so good with money these jews are i see why we are only <number> trillion in debt oy mcvay	2
what happening in venezuela is that jews are imposing talmudic wealth confiscation on non jews by force aka communism as mandated by talmud same process is in its first stages in usa where jews refuse to repeal the cash confiscation scam known as obamacare	2
no shit but if you do not think blacks and mexicans and white supremacists do not get into fights you are naive and have no clue	1
bampumim teixeira an immigrant from west africa	1
sprinkling adderall on my morning bagel hi i am calling to schedule an outlook meeting with your director if you could return my call	1
<user> i bet but whoever knows about the series should not goku barely did it with mui so without it he d get raped gogeta mash down broly so if he wanted to kill broly that would have happened	1
getting sick of not taking action everyone a kike	0
<user> spanish is the 2 nd most spoken language on the planet even i speak spanish but no white person would learn arabic for fun and i stated that i was african arab in my tweets stop clowning yourself for assuming my race like that	1
it okay to be white it okay to be black it okay to be asian it okay to be a woman it okay to be a man it okay to be gay it okay to be straight you all taste the same	1
you ever see something happen and you just stand there thinking “ whew chile the ghetto ” 💀	2
<user> and everything everything book movie i ’ ve watched crazy rich asians yesterday amp i loved it	1
we should all send thank you notes to wikileaks and all the others that saved us from a drunken evil perverted psycho bitch finishing up the destruction that obamination started	2
this is just because of that queer eye video going around and people in the mentions being all crazy about bernie or whoever else and just they are politicians stop idolizing them to this degree pls it weird	1
<user> what in the white devil	2
<user> <user> <user> <user> <user> <user> <user> <user> just like she dismissed all the women girls her husband raped assaulted and molested	1
steven universe spoiler steven won by roasting white wtf	1
good lord eliaundelis i ’ m a good lancer of the parchment not a queer sculptor	1
anybody noticed how lefties have changed tactics now their waycyst card has become so worn useless anybody against mass gimmiegration multicul moslem fascists are white supremacists still will not defeat the right we are on the rise cultural marxism is a busted flush	2
moral of the story niggas be lying	1
yo hotep babydaddy aint send your child support on time so you tryna lash out at the huuwhyte man lmao relax moolie you know niggas is always late stop hyperventilating he will give ya <money> soon enough	0
how dare you oakland mayor libby schaaf and governor jerry brown put our national security at risk think that illegal immigrants are more important than american citizens put american citizens and law enforcement officers lives in danger	1
<user> i am fed up w this nigger	0
french mayors panic as invading muslime migrants overwhelm cities keep your borders open french president moron there are more muslimes looking for freebies and to take over your nation muslimes are no value added to france or any european nation or america deport putin says syria war over	0
i ’ ve been a boujee bitch all day	2
whiteskins are so stuped by xtianity they think jews are just fellow whites with bbn no they are different race sick of racists who dont take race seriously	2
speaking of does anyone know which goy group the jews intermarry with in the greatest numbers i was under the impression it was either asians or catholics	2
all these niggas wearing durags but none of these niggas spinnin 😂 🤣 🤔	1
<user> wow this is basically the queer version of saying being gay is evil this is wild and not in a good way at all also as the thread continues comparing sexual orientation to racism is both a reach and just bad	1
with so many switching from twitter to gab they should be known as twitter refugees lol 😎 😃 😂	1
zojuist gab geïnstalleerd naar aanleiding van de nieuwe duitse wetgeving we moeten niet lijdzaam toezien hoe onze hard bevochten vrijheden worden afgenomen	1
<user> <user> that ’ ghetto okay 😂 😭	1
<user> he is a commie muzzy white hating cunt who is at war with america hang him for treason	0
not surprising when the white majority has had marxist propaganda shoved down their throats by kikes for decades from all angles pedowood talmudvision print media all jew owned and pushing poz <number> <number> public school systems and higher academia infested with commie jews dictating the curriculum	0
i don ’ t degrade or call women out their name in real life i just call my queens my bitches cuz that ’ how i was brought up lol	2
any normal nation would ever want muzzie biodegradable trash in	2
why does anyone care what the albino nigger has to say	0
<user> and this is why im gonna go join the nazi atleast they dont hide or change their views every day	1
want to pay for roads with taxes make pumpkin spice everything lovers pay that tax fuck those basic hoes and fuck them hoe ass roads	1
the cops will investigate this bacon attack but do not have the resources to investigate young girls being raped by fucking mudslimes time for a revolution time to hang the traitors in the public square	0
<user> <user> white coats come along ma am hillary oh i seem to have lost a shoe white coats come along ma am	1
<user> i hate you	1
i feel like me saying i wanna be a teacher and then in the same breath being like grammar is a fucking joke gives a lot of white boomers whiplash	2
<user> you only dislike him cuz he ain t musty trailer trash like the pink dick you normally go for	2
every last one with a drop of jew blood how do you actually foment a reasonable theory of who and are not gentlemen when the nazis inducted jews into jugend and put them on the cover of their family oriented magazines	0
<user> basically an early version mentioned every victim of the holocaust except the jewish people	1
good to know that that time when a bunch of blacks gang raped a white girl then pissed on her face while telling her that for <number> years of slavery bitch was by definition not racism	0
my mom went out and wore a mask and she said two old men told her that she “ looks like the asians ” i cant believe	0
<user> on god those people are retarded bro 😂	2
looks like a raghead ran some more people over in canada let been some more in the country to fuck everything up way to go	2
<user> <user> what else is new fabricating racial tensions blacks are very good at lying about white racial attacks only hurts those truly attacked	1
<user> so you are going to set free all of the immigrants whom ice has jailed cool get working on it lil marco	2
<user> chutiye im n indian muslim we fought for freedom gandu	1
well now that that over time for me to hoe out 💃 🏻	1
<user> <user> tell that to trayvon or any other dumb nigger that got shot beating ontop of a cop theres more bodycam footage to disprove your theory than your brain could comprehend	0
chicago annual illegal alien related expenses are <number> million and their annual annual deficit is <number> million you do the math	1
sad story to be sure on a side note some guys should not ever wear tank tops how does any take that spaghetti armed guy serious dress like a white man that nigger shit unless you are in the gym	0
<user> not newsy that his redneck followers sticking by him now what about his sponsors and advertisers that surely more newsy 😂	2
bitch you out of line why you waste my time i am trying to smoke trying to get high see it in my eyes i know she playin both sides that bitch tellin lies	2
<user> some of me mates play in that division and i must say they all look malnourished 😋	1
gab is the white ghetto	2
<user> do you think this is a fucking game	1
we need to start punching arabs for saying the n word	0
tnb what else can we expect from the ghetto monkeys	0
feel good story spic forced out of his job build the wall	0
<user> lol sheesh some of these hoodrats are ghetto fine	2
i regret to inform of ur imminent demise men put ur phones down look ur women in the eye	1
huh the gays really can ’ t drive	2
the white bitch got found guilty yes lord	2
that probably what muslim women think it all about trust	1
you are a fucking mush brain jew i fucking know that about iq and never said any different i said that a shitskin thinks a white woman is an upgrade because they do because she is you are like in the mossad special education classes for slow jews or something	0
according to shia islam the devil makes you gay if you are not a shia someone get the vp on the line and let see how many volts it going to take to shock the gay out of all of those goatfuckers	0
dm to paypal me faggots cash fag paypig cash master cash slave	2
i love this hashtag so much muslimsforshawn ❤ ️	1
moslems are not allowed to codemn the terrorists all moslems are to commit violent war jihad the main jihad btw and the only guaranteed path to moslem paradise as long as some in the community are doing this jihad terror it absolves the rest of their responsibility hence the silence	0
<user> devildog put both on to a spectrum the number of radical muslims that support carrying out jihad is big the number of radical jews that support and employ the talmud is small in comparison yet their leverage in media financing academia and politics is revealing bad influence on both	1
when are trump and congress going to do something about fags and dykes shutting down christian bakeries maga	0
so according to sky news any italian political party who is staunchly anti immigration anti eu are neo fascists these leftie multicul moslem loving lunatics need culling or locking up in a straight jackets in reality they are the fascists	0
tranny do you all remember the story of deandre harris it gripped the nation in august today he sat through two hours of a grueling soul crushing cross examination i know i have been cross examined by the same man deandre harris is a nigger terrorist who deserves to die of sickle cell	0
laura loomer ‏ <user> 7 m7 minutes ago laura loomer retweeted laura loomer how many dead people are going to be voting in the californiaprimary today voterfraud laura loomer added laura loomer <user> how many illegal immigrants are going to be voting in the californiaprimary today	1
<user> <user> but nokuthula is the first barrier to their businesses so they are protecting nokuthula so we can see that having white protection gives you ultimate protection you know the house negro shows of benefits of being one mugabe was for the people gaddafi for africa hani for africa	1
it seems that the whole blm movement boomeranged on blacks in the ghettos ytd in <number> homicides in chicago are down from the same period in <number> but are still way up from the same time period in <number>	1
give me three raghead desert fuckers i can teach and whip those fuckers into americanism	0
1 8 th century mayhem and lawlessness had nothing on loud mouthed donald trump the republicans of today congress these buffoons will be short lived 🙏 but i thought violation of twitter rules included threats and incitement to violence why has not twitter shut dopey donny down	1
looks like this fat fuck muzzie has not missed too many meals probably on the us tax payers dime these inbred muscum are the ugliest people in the world	0
anywhere there are large numbers of jews such as jew york you will find lots of dirt and garbage that because jews are rats in quasi human form	0
there a special contingent of young white leftist women who seethe with contempt towards older women while ignoring poc just say you hate your mom and go	1
i do not give a fuck kill them all and let god sort them out i am done with this sandnigger shit	0
<user> mr trump if anyone had questions as to weather or not you should be removed from the white house this tweet should put people at rest as to your fitness we <will> remove you and then the trials will start in earnest you can call it ex presidential harassment	1
hackney south not quite so nigger these days more turk turds sorry kurds but hackney north with diane abacus is black in the main	0
i know there women who lie about getting raped but when there proof how tf can you justify that cause it your boy you all niggas are real life weirdos you all mothers should of never birthed you all forreal mal paridos	1
<user> fuck nazis white knighting for palestinians it is the dumbest most dishonest looking shit none of you care about these sandniggers if you do check yourself no fuck you bethlehem palestinians belong to one of the oldest christian communities in all of christiandom	2
with the village people blaring from a <number> <number> track ghetto blaster slung over polly shoulder	2
good question if i have not eaten already i would of been triggered into getting one right now however that can wait tomorrow mm the one pizza you know a sand nigger will not make touch	0
looks like theyre a bunch of sluts too this is nigger tier propoganda	0
that the kind of trolling that makes the jews in israel want to kill him god bless that brave brave man and keep him safe from his enemies	1
skinhead dyke cunt	0
<user> <user> <user> <user> <user> go back to your tv trailer trash and listen to cnn some more any acts of violence is disgusting left or right	1
<user> i hope ice arrest illegal immigrants and their sponsors	2
i can not watch the whole interview with the young lady will she be able to be to engage aggressive muslim men in civil conversation as she is being beaten dragged disrobed and raped by them	2
yu really can not save these hoes they do not wanna be saved	1
need a sim card asap dis getting ghetto	1
how do you plan to combat the narrative with your muh optics shit because last i checked optics fags would rather bitch and moan than get out and do anything	0
queer eye is my shit a bitch is addicted	1
how to tell if a game engineering job in santa ana ca it a literal white supremacist nazi	1
shoutout to <user> for conflating punjabi people sikhs with the towelhead trope go off sis i suppose	1
<user> don ’ t retweet ls mark on my timeline he ’ homophobic for saying the f word <user>	1
<user> i kept twitching with every single time he virtue signaled about the immigrants and refugees tearing down the middle aged white male	1
got kicked out of facebook again for <number> days because i called a muzzi alla a pedophile and a pervert no 1 st amendment over there the muzzis can call christians anything they want but not the other way around	0
some sad sacks of shit can only ever get attention by being as completely retarded obnoxious as humanly possible such pathetic nothings would have been totally shunned before social media the greatest failing of the internet is that it exposes us to the blatherings of blithering retards	2
time for realjustice bcuz islam is a cancer on humanity that needs to be eradicated not enabled purge deport crusade white europeans have to get their mojo back fireuptheovens	0
spic nigger chink are just three examples	0
<user> islam is nothing nut an evil bloodthirsty cult	2
niggas be knowing and be cool with everybody	1
<user> <user> lmfao	1
tbh the only dm i have not muted is bc girl that bitch is cute <user>	1
these muhfuckas being ungrateful like a dirtyass nigger werd	0
<number> <number> statements issued by va state police in the aftermath of last weekend violence directly contradict inflammatory claims made by gov terry mcauliffe that white supremacist groups stashed weapons around town in advance of the unite the right rally against the removal of confederate statues	1
when you choose to do the exact same thing as the queers and nogs are doing because you are retarded	0
i think something very bad is going on and i think its to do with the <number> million white girls raped by pakistani muslims plus all the paedophiles the hunters are catching i have not crossed the t or dotted the i d but something is not adding up	0
no nigger bich taking da last pack of spare ribs when i am around	0
<user> <user> there are very poor uneducated whites who are racist toward rich blacks who has the power not the white person he economically socially and culturally not in a position of power compared to the educated african american where the institutionalized power now	1
them scam us with white blackberry black blackberry	1
im here im queer and im full of fear for my future career a poem by a stressed gay a k a me	1
<user> this is a islamic handle	2
<user> <user> are they considered refugees if they broke the law before the storm not trolling genuinely curious about when the refugee status is applied	1
american neoconservatives canadian liberals and european leftists hate russia why because russia is white christian traditional and conservative russia is building orthodox churches rejects the homosexual agenda and opposes multiculturalism russia today is reminiscient of western europe <number> years ago russia is not cucked	0
not happy w trump disavowing altright nazis nothing can be further from the truth spencer whoever is just obama cia plant trump border wall refugee vetting intent ending sanctuary cities are viewed as racist by left will he backtrack now maga presidenttrump newyorkvalues	1
nia vardalos in my big fat greek wedding made me gay	1
can faggot stop being a derogatory term for gays and start being a derogatory term for just terrible men in general because i really like the word and honestly i have known a lot of faggots in my life and they were not homosexuals	1
ffs just seen yet another <user> report that has failed correctly report the basic facts correctly so much for basic research	1
what about the john kerrys theresea heinz hugh hefners bill gates there are a lot of white looking jews in the us government look at the rash of presidential daughters with interracial marriages	1
yeah that one was special he got really mad at people that called him out on it too it a common kike tactic that the ragheads picked up on too	0
these women making the allegations were willing to chuck their self respect to be part of a scene or to advance their careers while those who knew what was happening allegedly looked the other way to protect their position or because they were personal friends with knowles faraci	1
this is why god told his people to kill the queers and he cursed the land that permitted them leviticus <number>	0
<user> <user> this negro did not nothing wrong to you for you to burn him like that	1
it ok he is yid anyway	2
if you are a woman and you drive over <number> mph on the freeway you are a lesbian sorry i do not make the rules do not worry we will take care of you now	1
no more racist than what you just said you know nothing and your nigger friends are useless	0
whatever white people do asians dont have to follow	1
if they do not like it here they need to get the fuck of our lands and go back to sand nigger country crusade muslims getout	0
im a pagan so fuck the bible the founding fathers would be pissed to see a nigger in office and melting pot of european culture not 3 rd world parasites any other	0
<user> <user> shit they all look there same	1
can you imagine what would be happening on the streets of the uk right now if that had been an attack on a muslim event	2
king sobieski with his <number> k polish soldiers defeated <number> k arabs near vienna we will stop em again cuz the rotten west lost its balls	0
insinuating that i am the retard whilst claiming to be in the alt right whilst shilling for jews and faggots nice whole new levels of retard have been achieved with this one	2
<user> happy birthday to one of the greatest muzzrat slayer may mahadev bless you and may you keep kicking these muzzrats n com rats in debate sir 🙌 🙌 🙌 🚩 🚩 🚩 🚩 🚩 jai mahishmati ✊ ✊	0
michael the angels that betrayed a heavenly secret were banished from their place for one hundred and thirty eight years louis ginzberg 『 the legends of the jews 』	1
imagine thinking that <user> is a homophobe because he said faggot once lmao could not be me	1
normie will not approve of his kike gassing platform but straight ticket voters gonna straight ticket which is usually enough to win	0
left wing politicians allowing this for the muzzrat vote jo cox did not learn just saying	0
school vouchers are a major cuck program to use tax dollars to make private schools ghetto just like the public ones schoolchoice schoolvouchers	2
wise men say u a faggot	2
once again what the fuck are you babbling about no wonder you have such an abysmal post to score ratio you are a blithering nigger with a sub <number> iq and a sub <number> word vocabulary you should change your name to obamasucksatgab you worthless yid loving mooncricket	0
you know if a poor muslim refugee replaced you it would actually be an improvement over you	2
<user> any white girls that get raped can show solidarity with their attacker as its not his fault he did not enjoy a privileged start in life and probably her own fault because she did	2
in a <number> character ghetto ideas will surely never be exchanged	2
its not a recent muslim invasion it happened to christians in libya egypt syria and sects in ukraine there are bad jews that bring bad to themselves	1
if i was her i would do my godly duty and accidentally knee that bitch in the jaw claiming reflex as an involuntary response to uninvited stimuli	2
no most white men do not rape <number> year old women that department is saved for your compadre beaners and young black males	0
flaring your nostrils in every photo is the new white trying to be black	1
nah baldwin might be making a good point here i have no love for the kike weinstein or the thots who whored themselves for money but baldwin can let the feminists and jews bash him for a while might redpill him and flip him from being a libtard	0
i went to school with marc almonds soft cell sister she was a hebe btw 😉	2
it ’ a crime to put illegal aliens before americans and i ’ m f ’ kng sick of it	2
i do not fuck with niggers little boy	0
<user> yuel and societte might slightly edge them out and of course vira and kat but yeah very gay	1
<user> aww pidi <user> should also visit in countless kashmiri hindus living as refugees in various states from the delhi to andaman	1
<user> <user> <user> he wants a white ethnostate and thinks that the holocaust didnt happen and that the jew globalists control everything	2
catherine the only place to get white kids is from white women and the only way to overcome the invasion is white kids	1
<user> critics say that sand sold by trans black lesbians tastes better than pizza made by cis straight white men	2
<user> i dont give a fuck how muslims feel 😃 👌 🏻	2
started playing life like chess you niggas is pawns i headed straight for the king and queen they call the shots	1
you all blame everybody and they momma except the nigga that cheated on you	1
<user> help i am retarded idk what it mean	2
i ’ m a pretty bitch i don ’ t deserve to be stuck in bakersfield	1
the only thing that makes a black ghetto as stinking black men selling drugs and committing crime because it cool and it in the hood these f coons who destroy society should be executed worthless s* screwing <censored> up societies throughout the world f***ing <censored> nigga c**ts <censored>	0
zuckerberg a retard bezo is a retard the owner of google and twitter are retarded and many more only trump supporters are human beings the rest are like my wife complete scum	2
can not believe that saad hariri undoing could be some white south african lady named like candijce van der p.w. botha foogejnschdat	1
little bit of coach effect finally going on today clawson petersen and sonny dykes and carey negative strong collins addazio and helton	1
i doubt that filth fucking bolshevik kike said that	0
<user> khurram what on earth you are doing asking pertinent questions in a country of imbeciles pakistanis does not even have rudimentary understanding of government and institutional roles and responsiblities growing up our brains were raped by pak studies and islamiyat lessons	1
a simple solution to not having queer kids 🤭 🤭 🤭 🤭 do not have children if you can not fully accept them you d be a horrible parent anyway do not worry you will not die alone your homophobia and close mindedness will soon manifest and keep you company xx	1
you are fucking retard	2
the numbers i heard about were that <number> million jews were killed but also <number> million others homos mentally retarded political foes etc	2
that judge just broke federal laws he gonna get swept up with the rest of the retarded trash in cali	2
<user> i am obvi a war queer til i get kidnapped by pirates during civil war <number> and become the ship queer at some point the pirates realize my pedigree and decide to make me their priestess at which point i transition to religious homosexual	1
<user> <user> at all shit is trash niggas retarded	2
stream every ghetto every city by clairo	1
<user> blonde hair and blue eyes these events are not the same but they both discriminate in a way and the white people will feel bad about the people killed in the holocaust cause but making poc	1
apparently he had a shirt with badges of the white power and ussr hammer and sickle symbols and another one that says born to kill sickening	1
we have the most generous immigration policy but what is a concern is when illegal immigrants come and undermine a variety of the systems that work in order to make our society function madeleine albright	1
on the one hand i had to mute <number> or <number> faggy nazi accounts and on the other hand i have to fight mosquitoes outside this morning not sure what the most annoying	2
<number> intensity by anyone wearing black and gold right now fans included	1
contact me for a shirt that is black and in white says the global minority front white people on the back	1
michelle obama fluent in ghetto	2
yo why some old white guy start coming at me at the gas station cause my music is ghetto 😭 nigga said this is not the ghetto go somewhere else guy stfu once i said he looked broke tho	1
trump is big faggot	2
broke dirty funky underarms stinky ass bitch 😷 go shave hairy 🤮	2
no really would this retarded oaf that claims to be my father just hurry up and have a heart attack ¿ ¿ ¿ ¿ ¿ ¿ ¿ ¿	1
a one man army of <user> ‍ then stop larping you are a faggot who talks shit about one of our guys who is getting locked up for <number> years as a political prisoner	2
love that pic exactly where the nigger needs to be forthousands of years the nigger inferiority has been known	0
south of the md is just as bad atlanta memphis nashville tampa jacksonville charlotte houston dallas nawlins etc the ol south is a memory you guys have been tossed away for blacks and muzzies	0
<number> liners are old oredi bitches we old old dumb	1
<user> you are easily the best youtuber out there but you are still a nigger	0
get that person out of here rallies mexican immigrants r murderers rapist shootings russia if you are listening hacking we need to protect the whistleblower at all cost you know what we use to do to spies trump uses his platform to insite violence get results	1
nothing but a kike fuck	2
a dyke gone call me fake bitch you fake	2
the schools are not the problem the ghetto students are the problem <user>	2
shes hoping some bluegum will rape her dried up old liberal ass	1
my rhymes pass any bar exam they call me kincannon <number> shots to your think tank im wavin twin cannons you a fag that loves it up the ass you are a ken kaniff and yo bitch gimme sloppy toppy they call her steve bannon the g.o.a.t.	2
<user> but i have nobody to be gay for	2
[truncated: 13,384 more rows]
