# Supplementary material
Source: ML conference proceedings conference paper supplement (https://aclanthology.org/2024.emnlp-main.886)
Supplement: software [file Hi.xlsx]

## Sheet: Sheet1
tweet_id	text	task1	task2	ID
1127755185944711170	1 आदमीं को मारने पर गोडसे आतंकी हो सके है तो 17000 सिखो, 5000 भोपाली, 3000 तमिलों का कत्लेआम करवाने वाला भारत रत्न कैसे हो सके है?	HOF	HATE	hasoc_2020_hi_2250
1123578938406592513	RT @Vishesh4: @jawaharyadavbjp जवाहर यादव, अगर हिम्मत है तो पूरा वीडियो डालो फिर तुम्हारे झूठ सामने आएंगे। दीपेंदर ने साफ कहा, कि भाजपा और…	NOT	NONE	hasoc_2020_hi_381
1127750010156642304	RT @FunKeyBaat: #भगवा वस्त्र पहन कर मतदान नही कर सकते लेकिन बुरखा पहन के कर सकते हैं @yadavakhilesh ? ये आज़मगढ़ है और यहाँ से "टोटी चोर"…	HOF	HATE	hasoc_2020_hi_1510
1127660759553597441	Yey nina khothani labafazi benu phambili Finish and klaar 🍑🌊	HOF	PRFN	hasoc_2020_hi_1010
1123487255136489472	RT @Rajeshbhanjan2: जब भी कोई सिकुलर कोंग्रेसी गुलाम चाटुकार चरणचाट चमचा 'गाय' और 'बछड़े' को लेकर भाजपा पर तंज कसता हुआ दिखे तो इतिहास के झ…	HOF	HATE	hasoc_2020_hi_331
1127496128922939392	RT @AkalLess: काश ऐसा क़ानून अगर हमारे यहाँ होता तो पूरी @AamAadmiParty सर @ArvindKejriwal के साथ तिहाड़ जेल में निर्विरोध चुनाव लड़ रही हो…	HOF	OFFN	hasoc_2020_hi_1719
1123622798251806721	RT @Aaliya11_: मुस्लिम_ईसाईयों की जबरन नसबंदी कर देनी चाहिए साध्वी ठाकुर मैडम जब अपनी जमीन बंजर हो तो दूसरों की खड़ी फसल देखक…	HOF	HATE	hasoc_2020_hi_3047
1127761942968332288	RT @neel23456: @TVMohandasPai मौन सिह- अरे ओ पचौरी तूने कांग्रेस का नमक खाया है पचौरी- बराबर बोले सरदार मौन सिंह- नमक का हक अदा करने का समय…	HOF	OFFN	hasoc_2020_hi_3530
1127471315449810944	@ECISVEEP उंगली में दाग अच्छे हैं। https://t.co/lRj1CYiHsY	NOT	NONE	hasoc_2020_hi_62
1127524469847642117	RT @BJP4India: आज जब मैं सिरमौर आया हूं तब 300 से ज्यादा लोकसभा क्षेत्रों का दौरा करके यहां आया हूं। मैं हर प्रदेश में गया, वहां पहनावा बद…	NOT	NONE	hasoc_2020_hi_2628
1127641008609476608	RT @ppbajpai: ममता तैयार हो रही है दिल्ली के लिए..! पूर्वांचल में योगी का जादू गुम हो चला है..! केजरीवाल ने एतिहासिक भूल तो नहीं कर दी..!…	NOT	NONE	hasoc_2020_hi_647
1123575431955910664	भारत के लिये बड़ी खबर मसूद अजहर को ग्लोबल आतंकवादी घोषित किया गया	NOT	NONE	hasoc_2020_hi_2565
1127757564089790464	RT @ParwezK92714513: पति का कितना खयाल है इसे रोज स्वर्ग मे जाती है https://t.co/XDyqcT1A9U	NOT	NONE	hasoc_2020_hi_1874
1127530153146327040	RT @AshrafFem: मौसम की वजह से 'विशेषज्ञ' हवाई हमले की तारीख़ बदलना चाहते थे। मैने उन्हें बताया कि बादल हैं, बारिश है, तो फ़ायदा है। बादलो…	NOT	NONE	hasoc_2020_hi_39
1127592098797060097	@ihirarafique chanda ♥️ tumhein tou pata hai, sometimes I don't know kese kahoon ya sunnay wala samjhega? Ya main samjha bhi paunga?	NOT	NONE	hasoc_2020_hi_1335
1127793828042162176	RT @ChaturvediS2: कैसे चलाया जा सकता है,,, यह तो,, पेट से सीख कर आये हैं,,,अभिमन्यु ?????? 👉परनाना जैसे अय्याशी के साथ,, 👉दादी जैसे इमरजें…	NOT	NONE	hasoc_2020_hi_2951
1127502412028080128	RT @ZeeRepublic: तैमूर अली खान के बिगड़े बोल कहा-बाकी लोग तो बस मोदी को हारते हैं विरोध करते हैं लेकिन छाती पर चढ़कर मूंग तो सिर्फ केजरीवा…	HOF	OFFN	hasoc_2020_hi_3735
1127465791526322178	RT @s_ambalika: @Yogesh_Bajaj1 @KChugh9 @PoojaYa10361065 Sir,. वो माँ जो कभी घर से बाहर भी नहीं जाती, जो किसी से फालतू मतलब नहीं रखती,, जो…	NOT	NONE	hasoc_2020_hi_315
1127515410151104513	RT @neeta_pankaj: @ShilpiSinghINC आंटी राहुल गांधी को परधान मंती बनाने के लिए महागठबंधन में से कितने दल राजी हुए ..!	NOT	NONE	hasoc_2020_hi_2793
1127735288170778624	RT @VeerLotus: मोदी जी को चिल्ला-2 चोर बोलना और बेहिसाब बेलगाम गालियां देना तथा उनकी छवि खराब करने को फैलाया झूठ का बदबूदार रैता सब जायज था…	HOF	PRFN	hasoc_2020_hi_516
1127584213530697728	@PreetiSMenon @ArvindKejriwal @GautamGambhir @AtishiAAP चोर चोर मौसेरे भाई	HOF	OFFN	hasoc_2020_hi_1925
1127563627890741249	RT @Payal_Rohatgi: #MothersDay यह दिन को आप सब आज मना रहे हो पूरे देश में मगर शायद आपको यह भी नहीं पता कि यह भारतीय संस्कृति नहीं है। यह we…	NOT	NONE	hasoc_2020_hi_2133
1123794412394487813	RT @Aryavrta: #IndianJudiciaryAtStake बड़ी बहन के साथ दुष्कर्म हो तो क्या वो अपनी छोटी बहन को समर्पित करवाएगी❓ 2007 तक आश्रम में रहें,201…	NOT	NONE	hasoc_2020_hi_2179
1123823952894332929	RT @BJP4India: बंगाल से ममता दीदी का जाना सुनिश्चित हो गया है। 23 मई के बाद बंगाल के अंदर परिवर्तन का सूर्योदय होने वाला है: श्री अमित शाह…	NOT	NONE	hasoc_2020_hi_3930
1127521651283808256	ममता के बंगाल मे जब इतनी मार पीट चुनाव के दौरान होती है तो वहाँ राष्ट्रपति शासन लगा कर चुनाव कराना चाहिए।लोगों को मार कर लोकतंत्र ला रही है ममता।चुनाव के समय राष्ट्रपति का ही शासन पूरे देश में होना चाहिए ।	HOF	HATE	hasoc_2020_hi_258
1127767819184029696	RT @bijendra125: #जय_सिया_राम_जी आपका दिन मंगलमय हो। "#समय जब #नाच नचाता है ना, तब #सगे_संबंधी भी #काेरियाेग्राफर बन जाते हैं।" #जय_श्री_रा…	NOT	NONE	hasoc_2020_hi_2838
1123574354057486338	#GHMSNNews *Breaking News* - केंद्रीय मंत्री नितिन गडकरी की तबीयत बिगड़ी https://t.co/KKpGpzDEaW	NOT	NONE	hasoc_2020_hi_1100
1127567134295351297	मेरा वोट बृजेश गोयल जी को झाड़ू अरविंद केजरीवाल जिंदाबाद https://t.co/CUPmLEIrJv	NOT	NONE	hasoc_2020_hi_989
1127786743896272896	@guddusinghdss "करता नही है कोई कद्र यहाँ किसी के अहसासों की . . . हर किसी को फिक्र है बस मतलब के ताल्लुक़ातो की . . .!!!	NOT	NONE	hasoc_2020_hi_3820
1127759208261345280	@RanaAyyub तेली का तेल और मशालची की छाती	NOT	NONE	hasoc_2020_hi_2492
1127468572370882560	RT @ranjeetadadwal: #LokSabhaElections2019 @ECISVEEP सुनील अरोड़ा के वोट डालने के बाद तस्वीर खींचते। @IPSMadhurVerma @JournoPranay @ashoke…	NOT	NONE	hasoc_2020_hi_2490
1127575682312232961	RT @SureshN12555265: सोनीया गांधी का एक और सच सामने @RahulGandhi यह कैसा घिनवना काम हुवा है तुम्हारे खानदान मे कहो ना झुठ है सबसे पहले अपना…	HOF	OFFN	hasoc_2020_hi_1101
1127583991232585728	RT @SinghAwantika: अगर सारे करोड़पति बन जाएंगे तो मजदूर अफ्रीका से पकड़ कर लाया जाएगा? अमेरिका जैसे विकसित देश में भी लोग मजदूरी करते है, ऐ…	NOT	NONE	hasoc_2020_hi_1028
1123598148335742976	RT @rajamaka: पंडित नेहरू जब प्रघानमंत्री थे, उनके समय कुंभ में भगदड़ हुई थी लेकिन बदनामी के डर से यह खबर को बाहर ही आने नही दिया था !! क्…	NOT	NONE	hasoc_2020_hi_1756
1123569807419330560	झांसी, प्रियंका गांधी के रोडशो में नारे लगाने वालों के खिलाफ कार्रवाही, तीन को दिखाया बाहर का रास� https://t.co/anjc4at0vw	NOT	NONE	hasoc_2020_hi_1540
1127472938616156160	RT @92mhq6QNslesNLP: कल मतदान जरूर करे....!!! चाहे BJP को करो चाहे मोदी जी को करो चाहे कमल को करो पर मतदान जरूर करे।😂😂 #JitegaModiJi…	NOT	NONE	hasoc_2020_hi_887
1127801319069106179	@aroraups Logg Sharafat Mein Aksar Dhokha Khaa Jaate Hain 😆😆😆	NOT	NONE	hasoc_2020_hi_2500
1123521023473668097	@upasanatigress तू किसी काम की नहीं है दूसरे देश में जाकर बोझ बनने से बढ़िया है किसी गंदे नाले में डूब मर।	HOF	OFFN	hasoc_2020_hi_3652
1127542350165602304	@ArvindKejriwal बूथ खाली पड़े हैं।आप के बूथ मेनेजर नदारद हैं।	NOT	NONE	hasoc_2020_hi_1391
1127545672054509574	@Rupendr60418689 @deepak_hariom एक बुद्धिमान माँ अपनी सन्तान से प्रेम अवश्य करती है, परन्तु उसे योग्य बनाने के लिए उसके प्रति कठोर बनने में कोताही नहीं करती #HappyMothersDay https://t.co/xueGYitWx7	NOT	NONE	hasoc_2020_hi_3215
1127545021954048000	RT @_m_rohit: हूं मै बेइंतहां हूं आज भी हू ब हू हूं अब भी रगो मे दोडता मै वही खूं हूं बिखरते सिसकते से कुछ अरमां कोई हां हूं मै अभी जिंदा…	NOT	NONE	hasoc_2020_hi_320
1127647916623970305	RT @mogemboz: इतना फेंकता है कि आराम नहीं करता ! सुना है बादलों में रडार काम नहीं करता !!	NOT	NONE	hasoc_2020_hi_3486
1123617781872644096	@msisodia Agar offer diya hai to le lo bhaiyon. Baad main chavanni bhi nahin milegi	NOT	NONE	hasoc_2020_hi_3624
1127591218018340864	@GovindaPanditU1 @qWW1YjMppqfqvuX @Sonabhadauria1 @reenasinghgaur @mksbsli08 @sitaram74378829 @shashibhaya1 @OppressedHindu @dhritrastra @ckpearloflife @imrawool @Nirmal111 @bmcowl9 @Ramsharma9981 @JayGopalMishra2 @pipcrd @Ajeet_Tyagi_Ji @bhawanablog @pmmh2015 @neerajtyagimbd @sankrant मैं तो कब से इसका पता पुछ रही हुं, डर से ये लतखोर अपना पता बताता ही नही।	HOF	PRFN	hasoc_2020_hi_3022
1127465527301906433	RT @aajtak: ट्विटर पर बीजेपी के हैं दुनिया भर में सबसे ज्यादा फॉलोअर https://t.co/3OiFUA31w2	NOT	NONE	hasoc_2020_hi_1103
1127601372432453633	RT @delhichatter: ये वीडियो देख कर सारे कॉमेडियन अपनी लाइन चेंज करने पर मजबूर हो सकते हैं 🤣 https://t.co/j5flUFC38q	NOT	NONE	hasoc_2020_hi_2157
1127599765993082881	@Sunitkrsrivasta @RubikaLiyaquat क्या बात है इतनी गर्मी में इससे बेहतर कुछ नही हो सकता ।।	NOT	NONE	hasoc_2020_hi_1275
1127462977148530689	RT @RamPD78: अगर ये इंटरव्यू नहीं देखा तो कुछ नहीं देखा इस बहादुर बालिका के YT चेनल का पता हो तो जरुर बताना दोस्तों https://t.co/DbOOzqrq…	NOT	NONE	hasoc_2020_hi_1757
1127709392529448960	@ajitanjum @abhisar_sharma @ppbajpai @ravishndtv @Ra_THORe @narendramodi आप सभी सज्जन देखिए कि रेलवे एवं वर्तमान केन्द्रीय-सरकार कैसे भारतीय जनता जो रेल से यात्रा करती है यहीं रेलवे कैसे यात्रियों के अच्छे दिनों का झूठा दावा कर रही है? यह आप सभी को ध्यान से देखना चाहिए?	NOT	NONE	hasoc_2020_hi_4129
1127580925175275520	@BBCHindi इसे कहते हैं खतरो का खिलाड़ी।	NOT	NONE	hasoc_2020_hi_3950
1127617566623404032	RT @myogiadityanath: तस्वीरें सच बोलती हैं। आज आदरणीय @narendramodi जी की पूर्वांचल रैली में वृद्ध महिलाएं, कर्मशील युवा और मुस्कुराते बच्…	NOT	NONE	hasoc_2020_hi_876
1127592660854816773	@BBCHindi ये तो सही नही हो सकता	NOT	NONE	hasoc_2020_hi_3944
1127475266492649472	RT @DDNewsHindi: #NewsFlash: मुख्य चुनाव आयुक्त सुनील अरोड़ा ने दिल्ली के निर्माण भवन स्थित मतदान केंद्र में अपना मतदान किया #Phase6 #Mak…	NOT	NONE	hasoc_2020_hi_901
1127784848037482496	@AkhileshPSingh प्रधान मंत्री जी की यही बातें अच्छी लगती है जो मुंह मे आए बोल दो अन्ध भक्त है ना सब सम्भाल लेंगे।अच्छा हुआ कि ये नहीं कहा कि पायलट कि जगह मै ही गया था पाकिस्तान प्लेन लेकर हमला करने।।।	HOF	OFFN	hasoc_2020_hi_2524
1127613170984439808	@TheAzharSabri नही रविश कुमार	NOT	NONE	hasoc_2020_hi_2313
1127553846748672001	RT @Ajay27_INC: चौकीदार पहले से धोखेबाज है जिसने सत्ता हासिल करने के लिए #UPA के समय घोटालों का गेम प्लान किया.. और जनता को गुमराह किया..…	HOF	OFFN	hasoc_2020_hi_4201
1127517859620491264	मोदी के 'रेडार ज्ञान' का कांग्रेस सोशल मीडिया हेड ने उड़ाया मजाक https://t.co/MlVwUZz1b0	NOT	NONE	hasoc_2020_hi_3152
1127770759378554880	@kamleshtiwari03 कमलेश जी इन सुरो से दोगली कोम दुनिया भर में कोई नहीं इन सालो सारी आजादी हिन्दुस्तान में ही चाहिए अमेरिका में नंगे होंगे चीन में सुअर का मांस खाने को मजबूर लंका में इनकी लंका ही कर डाली म्यामांर में इनकी माँ बहन एक करदी आजादी हिन्दुस्तान में ही चाहिए	HOF	HATE	hasoc_2020_hi_1917
1127694452418588672	RT @tiwari_ashish1: भैया इस बूथ पर 400% मतदान होगा। बस दिक्कत ये है इन सब को पॉपुलर करने के चक्कर में मैं जेल न चला जाऊ😭😭😭😭😍😍😍😍😘😘😘😘😘😘 htt…	NOT	NONE	hasoc_2020_hi_734
1123594528630267904	तुझ पर कुछ लिखूं इतनी मेरी औकात कहां तूने ही तो लिखना सिखाया है माँ 👩 तू ही घर मेरा, तू ही जहां l 😍😍😘😘😘😘😘😘	NOT	NONE	hasoc_2020_hi_1715
1123827186694279169	भाई, सड़ जी अब नहीं जीतेंगे। 🤣🤣 स्वयं ही देख लो सड़ जी अब कितनी सीटों पे चुनाव लड़ रहे हैं ,और पिछली बार कितनी पे लड़े थे। भाई , तुम बहुत भोले हो। 23 मई को ऐसे ट्वीट डिलीट कर देना।😝	NOT	NONE	hasoc_2020_hi_436
1123627059664711686	RT @Hema_quotes: इसकी ग़रीबी देखकर आँखें नम हो जाती हैं! 😢 https://t.co/v0T8IpFhxQ	NOT	NONE	hasoc_2020_hi_3490
1127482921088978945	RT @hema_yadav14: हर रिश्ते में मिलावट देखी,कच्चे रंगों की सजावट देखी, लेकिन सालों-साल देखा है माँ को, उसके चेहरे पे ना कभी थकावट देखी, ना…	NOT	NONE	hasoc_2020_hi_3298
1123688363628879873	RT @jhaprabhatbjp: JNU में जिस नौजवान ने ये कहा था, भारत तेरे टुकड़े होंगे,जिस पर देशद्रोह का मुक़दमा चल रहा है और वो जेल में रहे, दिग्विजय…	NOT	NONE	hasoc_2020_hi_3341
1123528006968864768	Kolhapur and Dwaraka	NOT	NONE	hasoc_2020_hi_2125
1127608683095920640	लेकिन उन गरीब नौजवानो का क्या होगा जो 2013-14 में CTET QUALIFIED करने के बाद OVR AGD होगए उनको इन 5 सालों में KVS के RECRUITMENT मे एक मौका क्यु नहीं दिया गया? क्या GENERAL पुरुष 30 साल के बाद प्राथमिक शिक्षक बनने के लिए उपयुक्त नहीं है? क्या यही 1 भारत श्रेष्ठ भारत है?	NOT	NONE	hasoc_2020_hi_3565
1127485072775344129	RT @Nikhil58690778: @tiwari_ashish1 @NationFirst0010 दो पिज़्ज़ा के बीच में सुखी रोटी। क्या बोलूं यार।... कोई अब ज़हर दे दे मुझे।	NOT	NONE	hasoc_2020_hi_2170
1127618225141719040	@Swadesh03032906 Ok you win👍 जो ट्वीट किए वो डिलीट कर रहा हूं आपने भाई कहां इसलिए मेरे हिसाब से भाई बहन की लड़ाई में बहन ही जितनी चाहिए	NOT	NONE	hasoc_2020_hi_3429
1127540739544457216	@narendramodi हिम्मत तो बस आम के खेत जाने वाले में है ।हमारे यहाँ तो आम के बाग होते हैं ।और इन हिम्मत के पहलवान को जनता और लोगों के बीच में कभी नहीं देखा ।इतनी हिम्मत है पहलवान में कि अपने देश की जनता के बीच नहीं जा सकते ।	NOT	NONE	hasoc_2020_hi_4301
1123635720919441409	क्या आईना और क्या इंसान, कद्र नहीं रहती टूटने के बाद। 😏🙄🙄😏	NOT	NONE	hasoc_2020_hi_2705
1123632667449102336	RT @SurajDa62004341: #वेद_मेरा_भेद_है 🔸परमात्मा सहशरीर है उस का नाम कबीर है वह धू-लोक के तीसरे पृष्ठ मे विराजमान है l हीरे-जवाहरात से जडा प…	NOT	NONE	hasoc_2020_hi_2438
1127656321983995904	RT @ratanjha101: जिस आदमी को गाँधी के तीन बंदरों की कहानी भी लिखकर लानी पड़ती है भाषण के बिंदु कैपिटल अक्षरों में लिखकर लाने पड़ते हैं 125…	HOF	OFFN	hasoc_2020_hi_3733
1127535702189707265	RT @dpksharmaa: @SheilaDikshit @ArvindKejriwal बड़ी अम्मा आप इस चुतियानंदन केजरीवाल के बारे में मत सोचो अब दिल्ली समझ गयी है इस नक्सली को	HOF	PRFN	hasoc_2020_hi_3581
1127524629235388422	RT @abhisar_sharma: अब हम करें तो करें क्या ? बोलें तो बोलें क्या ? https://t.co/YkDMOL7T3c	NOT	NONE	hasoc_2020_hi_678
1123498550384398336	@BJP4Rajasthan कांग्रेस सरकार को ये पता नही है की पैसा कहा से आयेगा ओर ये गरीब लोगो को 72,000 मुफ्त रुपय देने का वादा कर रही है ये सब झूट है। कांग्रेस सरकार चोर है ।	HOF	OFFN	hasoc_2020_hi_2434
1127810903066521601	RT @MLArajeshSP: सुदूर ब्रह्मांड मे नये नये तारो और ग्रहों की खोज कर रहे वैज्ञानिको को ये भी चिंता सताने लगी है कि पृथ्वी के रेडियो सिग्नल…	NOT	NONE	hasoc_2020_hi_850
1127564219279273985	@desh_bhkt मुझे कुछ मिले न मिले,गम नहीं, मोदी जी के हाथों में देश की बागडोर किसी खजाने से कम नही, https://t.co/dT18ZKjhcy	NOT	NONE	hasoc_2020_hi_884
1127802673854599168	RT @INCMP: कुछ तो शर्म करो : - जीएसटी और नोटबंदी से धंधा चौपट करने वालों - किसानों के साथ धोखा करने वालों - जनता के टैक्स का पैसा विज्ञाप…	HOF	HATE	hasoc_2020_hi_1704
1127505704552521729	RT @IMinakshiJoshi: "20-25 साल बाद जब मेरा शरीर कमज़ोर हो जाएगा तब मैं किराए का कमरा खोजूँगा ।" @narendramodi क्या देवरिया से मोदी का संके…	NOT	NONE	hasoc_2020_hi_3292
1127751062931120130	@RSFBLB 🤣🤣🤣🤣🤣🤣 पप्पू पेलू के चमचे 🤣	HOF	OFFN	hasoc_2020_hi_2588
1127658654029602816	RT @SureshChavhanke: टीपू सुल्तान के भक्त @RahulGandhi के वोट की जगह भी "औरंगजेब लेन".. है !	NOT	NONE	hasoc_2020_hi_33
1127763759089373184	RT @SurekhaInsan: बच्चों को अपने माँ बाप की निंदा नहीं करनी चाहिए ,ऐसा करते हो तो उससे बड़ा पाप और कोई नहीं हो सकता। अगर उनकी किसी बात से ह…	NOT	NONE	hasoc_2020_hi_2595
1127497710183936001	@KarunaShukla10 इनके पिता जी शायद कसाब की अफ़जल जैसे आतंकवादीयो का केश लड़ रहा था उनको बचाने के लिये	NOT	NONE	hasoc_2020_hi_3111
1127492928690106368	@BeingvickyyZ आई को मेरी ओर से #HappyMothersDay बोलना पगलु	NOT	NONE	hasoc_2020_hi_1123
1127619751872589825	शाम को में चचा के इसी बयान को याद कर रहा था 😆	NOT	NONE	hasoc_2020_hi_857
1127513023592034304	आज का बादल देख कर ख़ुशी हो रही,मोदीजी कुछ अच्छा जरूर करेंगे। @Shehla_Rashid	NOT	NONE	hasoc_2020_hi_896
1127580430255845376	RT @AndColorPockeT: दिग्विजय ने खुद अपना वोट नही डाला और ये बाकियों से उसके लिए वोट डालने की अपील कर रही। https://t.co/TKoP4fww7J	NOT	NONE	hasoc_2020_hi_911
1127642635974217729	RT @upadhyay51: साड़ी पहनने की अंतिम तिथि 19 मई शाम छह बजे है उसके बाद इधर से साड़ी डालो उधर से जीन्स निकलेगी 😂😂 @priyankagandhi	HOF	OFFN	hasoc_2020_hi_561
1127471260932292609	RT @Mj0359: चमचो को समझ आने लगा है। #Haryanavotefornation #jhajjar https://t.co/noHoTDi7VN	HOF	HATE	hasoc_2020_hi_708
1127812274616356865	RT @ajitanjum: इंडिया टुडे पर तुरंत देशद्रोह का मुकदमा दर्ज होना चाहिए .ऐसी कवर स्टोरी कोई पाकिस्तानी ही छाप सकता है कि करोड़ से ज्यादा नौ…	HOF	HATE	hasoc_2020_hi_69
1123605618391044097	RT @AdityadasSatlok: #दहेज_मुक्त_समाज का निर्माण संत रामपाल जी महाराज कर रहे है। अब तक 30,000 से अधिक दहेज, फिजूलखर्ची और आडंबर मुक्त विवाह…	NOT	NONE	hasoc_2020_hi_3412
1127811947468967936	ये पप्पू क्या खानदानी पप्पू है क्या?	NOT	NONE	hasoc_2020_hi_3759
1127558875727650817	RT @atulkanakk: लोग भी यों ही बात का बतंगड़ बना देते हैं/ अब कोई मूँगफली बेचने के लिए तो राजनीति में नहीं आता ना! 🤣 https://t.co/yLTAb7y8Jv	NOT	NONE	hasoc_2020_hi_4325
1127560222095040512	@sambit_swaraj1 भैया इसके कहने का मतलब है कि 23 को चार लोगों की जरूरत है कांग्रेस को कंधा देने के लिए	NOT	NONE	hasoc_2020_hi_299
1123582344206606340	RT @Activelado: जरा सी बात करनी बंद क्या की पुराने दोस्तों ने धीरे-धीरे साथ छोड़ दिया ऐसा लगता है, जैसे.... मेरे बात बंद करने का ही इंतज़ार…	NOT	NONE	hasoc_2020_hi_1062
1127558804432752645	RT @dev_kundan: @yadavtejashwi @laluprasadrjd कितना भी कुछ कर लीजिए बिहार की जनता अब पहले वाली नही है , 7 सीट से ज्यादा नही आने वाली है ,…	NOT	NONE	hasoc_2020_hi_95
1127742573655650304	RT @AsaramBapuJi: मनुष्य जो कर्म करता है उसके प्रेरक-बल के रूप में उसकी इच्छाएँ, वासनाएँ होती हैं। यदि मनुष्य जन्म में उसे सही सीख मिल जाय,…	NOT	NONE	hasoc_2020_hi_2081
1127619047200190466	RT @ParthSonara4: गुजरात के गांवो में दलितों की शादी ओ में जातिवादी अत्याचार। #DalitLivesMatter	NOT	NONE	hasoc_2020_hi_4131
1127788585187282944	@PoonamS18957721 ओर उस से भगवान ने कह रखा हो कि मै उसको भेजूंगा, तो,🤗🤔😊	NOT	NONE	hasoc_2020_hi_4326
1127531071673757702	@ZeeNewsHindi रावण और उसकी भीम सेना का नकाब उतर गया ये सिर्फ भारत में जातिवाद का जहर घोलने वाले है इनको मतलब नहीं दलित बेटियों की ईज्जत सरेआम विडियो बनाकर लूटी जाती है तो लूटी जाऐ इन्होने चूं तक नहीं की । सरकार और दूसरी जातियों पर लांछण जितने मर्जी लगवा लो देश में फूट डलवा लो बस	HOF	HATE	hasoc_2020_hi_2769
1127506623109353472	RT @The_Hina1: “बद-क़िस्मत है वह इंसान जो अपने गुनाह इस मुबारक महीने में न माफ़ करा पाए।” “रोज़े की भूख और प्यास के द्वारा क़यामत की भूख और…	HOF	OFFN	hasoc_2020_hi_4179
1123587268294234112	RT @shuklapinku: porn gresi के दामाद आतंकी अजर मसूद अब आंतर राष्ट्रिय आतंकी .... इसका श्रेय नेहरू जी को जाता है !! 😀	NOT	NONE	hasoc_2020_hi_3916
1127650848408911873	RT @manakgupta: पाकिस्तान ने घुसपैठ बंद की, आतंकी लॉंच-पैड ख़ाली किए...फ़ाइअरिंग रोकने का ऑफ़र किया. घुटनों पर आ गया है आतंकिस्तान 👍 https:…	NOT	NONE	hasoc_2020_hi_2544
1127531268831191041	हमने अपना काम किया अब आप भदोही जिला का विकास करिए।	NOT	NONE	hasoc_2020_hi_929
1127497815045885952	न डराओ मुझे माँ कह कर मै एक माँ हूँ| तुम मुझे अपनी पूज्य मानते हो- ऐसा तुम कहते फिरते हो| किन्तु यथार्थ की वेदी पर इसमें मुझे कोई शंका नहीं किन्तु पूर्ण विश्वास है कि इसमें अब सत्य का सत्व खत्म हो गया है|... https://t.co/LkCOejDfce	NOT	NONE	hasoc_2020_hi_1439
1127534817183244288	RT @AshishSainram: हमने तो सुना था कि.. “चर्च के पादरी और नन सेवा करते हैं” पर यहाँ तो “पूरा” वेतन ले कर भी टैक्स नहीं भरते अगर सब ईश्वर…	NOT	NONE	hasoc_2020_hi_2534
1127799867873488896	Wo jo sabki surat pe haste hai Unhe tohfe me aaina dijiye #Sntosvd	NOT	NONE	hasoc_2020_hi_3487
1127494388320436225	#पुरे देश का एक ही नारा नरेंद्र मोदी चाहिए दोबारा #DeshKeDilMeiModi #VotingRound6 #हरियाणा @TrehanNeeti	NOT	NONE	hasoc_2020_hi_1555
1123491092891041792	RT @mrjitunpanda: जिनका अंडरवियर हरेक अमेरिकी एयरपोर्ट पर उतरता हो, वो दूसरों के अंडरवियर का कलर नहीं बताते	HOF	OFFN	hasoc_2020_hi_3117
1123559980148244480	सफ़र है, सफ़र में सबर रख के चल, कहाँ है तू इसकी ख़बर रख के चल, #SauBaatKiEkBaat कही ‘बेचैन’ ने जो कहना है तुझको वो कह के ही उठ, न दिल में ज़रा भी कसर रख के चल।	NOT	NONE	hasoc_2020_hi_1032
1123502128138477569	RT @Randhirkush: #WednesdayMotivation वेद बोलने वाला ब्रह्म कह रहा है वह स्वयं सतपुरुष कबीर हैं जो कबीर वाणीओं द्वारा निर्मल ज्ञान अपने हंस…	NOT	NONE	hasoc_2020_hi_3662
1127573480277307393	RT @JhaManyu1984: 84 के दंगे मे सिख मरते गए बेटियों का बलात्कार होता रहा गुरुद्वारे जलता रहे पर कुछ सीख बेशर्म सिख पापी काँग्रेस को वोट दे…	HOF	HATE	hasoc_2020_hi_2686
1127715688179568640	@sambitswaraj मतलब कांग्रेस को वोट दे दिया	NOT	NONE	hasoc_2020_hi_1017
1123526736115712001	@RubikaLiyaquat शर्म आनी चाहिए प्रियंका को	NOT	NONE	hasoc_2020_hi_2605
1127597220063272961	RT @Diyasin32915347: #BlackSpotOnJudiciary हरियाणा कि सरकार ने बहुत बड़ा घुन्हा किया है एक निर्दोष संत को उम्रकैद की सजा सुना कर जिस दिन ह…	HOF	HATE	hasoc_2020_hi_2326
1127685036193398784	क्या आप अपने खाली समय में घर या दूकान या ऑफिस या कॉलेज से बैठे बैठे हर महीने कुछ एक्स्ट्रा कमाना चाहते हैं? क्या आप दैनिक जीवन के सामान खरीद पर ढेर बचाना चाहते हैं? यहाँ से डाउनलोड करें और मेरे रेफरल कोड VTO6V का उपयोग करें - https://t.co/9E5JGRUA9j	NOT	NONE	hasoc_2020_hi_2659
1127582942643965952	RT @piyushtrips: सिर्फ पांच वर्षो में हुई इन उपलब्धियों ने कांग्रेस समेत सारे विपक्ष की नींद हराम कर रखी है | #NamoAgain #DeshKeDilMeiModi…	NOT	NONE	hasoc_2020_hi_2748
1127796780836331520	@AliSohrab007 @SultanAliqazi गलत जानकारी. बिहार में कुर्मी आबादी 11%से थोड़ा ज्यादा है ।	NOT	NONE	hasoc_2020_hi_988
1123798581545242624	RT @AsaramBapuJi: भगवान की जिम्मेदारी है पर आप विश्वास नहीं करते-पूज्य बापूजी जो अत्यंत जरूरी है वह कर डालो और जो बिनजरूरी है,थोड़ा जरूरी…	NOT	NONE	hasoc_2020_hi_1621
1127753160104112129	RT @BJP4India: देखिये: 'जो मोदी जी को बुरा बोल रहा है, वो है बुरा'...कह रहा है बिहार का युवा। #JitegaModiJitegaBharat https://t.co/akHScipV…	NOT	NONE	hasoc_2020_hi_2481
1123750607075016704	RT @ModiLeDubega: आतंकवादी प्रज्ञा ठाकुर BJP के टिकट पर चुनाव लड़ सकती है जबकि वह बम धमाके में जेल जा चुकी लेकिन BSFजवान तेज बहादुर घटिया…	HOF	OFFN	hasoc_2020_hi_2144
1127774815287332864	@anuragspparty @BrajeshYadavSP @yadavakhilesh @ndtv @Mayawati @RahulGandhi गरीबों का सुनने वाला कोई भी नहीं है ।हर कोई बस अमीरो की बात करता है।	NOT	NONE	hasoc_2020_hi_669
1127602383259951104	@ved175 @Rituchandel04 Sant Shri Asaram Bapu Ji ने बताया की बचपन में मीराबाई ने माँ से अपने पति के बारे में पूछा तब माँ ने यह बताया कि 'तेरा पति तो गिरधर गोपाल है।' तब से यही उसके जीवन का मूलमंत्र बन गया। #HappyMothersDay	NOT	NONE	hasoc_2020_hi_4371
1123552841442807810	RT @I_am_Anil_Tyagi: अब तो बच्चे भी कहने लगे कि चौकीदार चोर है😊 पूरा वीडियो आपने भी नहीं डाला जिसमे @priyankagandhi इन बच्चो को मना कर रही…	HOF	OFFN	hasoc_2020_hi_2875
1127598780344414208	RT @I_am_Anil_Tyagi: मुझे हराने वाला कोई पैदा नहीं हुआ---निरहुआ😊 निरहुआ बोलते गए और फँसते गए;भरपूर मनोरंजन के लिए देखें यह पूरा वीडियो। इत…	HOF	OFFN	hasoc_2020_hi_2800
1127756326791041025	RT @AshrafFem: मैं मुसलमान हूँ और मैं शपथ लेता हूँ कि कट्टरवादी चाहे मुझे कितनी भी गालियां दे या मेरे धर्म को निशाना बनाये मगर मैं कभी भी…	NOT	NONE	hasoc_2020_hi_3432
1127479758588137473	@ArvindKejriwal अरविंद जी अगर भारतीय जनता पार्टी जीती तो उसके जिम्मेदार सिर्फ और सिर्फ आप होंगे क्योंकि आप पूरे देश में तो क्या दिल्ली के संगठन को ही जोड़ कर नहीं रख सके हमें खेद है हम आप को प्रधानमंत्री देखना चाहते थे और आप	NOT	NONE	hasoc_2020_hi_4058
1123584852370923521	RT @SunildasBohane: #वेद_मेरा_भेद_है इस पूरी पृथ्वी पर एक ही संत है जो हमें शास्त्रों और वेदों के अनुसार भक्ति करवा रहे हैं वह सिर्फ संत…	NOT	NONE	hasoc_2020_hi_2397
1123620269069725696	RT @Jitendr54356112: देश का सामान्य नागरिक ऐसी गलती कर देता तो उसे भी ऐसे ही माफ करते । सामान्य नागरिक को निम्न कोर्ट भी माफ नहीं करता । स…	NOT	NONE	hasoc_2020_hi_1934
1127486586898108418	RT @VIKASHK98936087: @RahulGandhi कोने में बैठ कर चार अंधभक्त रो रहे थे,,, मैंने पूछा क्या हुआ ? तो बोले 23 मई की तैयारी कर रहे हैं😂🤣😂…	NOT	NONE	hasoc_2020_hi_2477
1127461634987970560	RT @RakeshKP1978: @RabriDeviRJD @laluprasadrjd का हो चाची सब कइलू, जब कुछ ना भेटाइल त अब इमोसनल कार्ड खेलत बाड़ू।एक बात कहीं। एहू से कुछ न…	NOT	NONE	hasoc_2020_hi_4037
1123806768830787586	RT @manakgupta: मोदी जी कह रहे हैं कांग्रेस नेता उनकी हत्या कराने के सपने देख रहे हैं. अब ज़्यादा हो रहा है PM जी 🤭	NOT	NONE	hasoc_2020_hi_779
1127469159552618496	RT @AvantikaDs: पाकिस्तानी लेखक ने बिल्कुल सही लिखा.. मोदी ने देशभक्त और देशद्रोहियों के बीच विभाजन कर दिया है..!!	NOT	NONE	hasoc_2020_hi_2019
1123825378936741890	@ArvindKejriwal Pehle jaake EC response sun lijiye fir bakiye @ArvindKejriwal	NOT	NONE	hasoc_2020_hi_1983
1127754732942970880	RT @YudhishthirSah6: @YuvrajP70879924 @Aryavrta गर्म पानी से स्नान नहीं करना चाहिए गर्म पानी सिर पर कभी नहीं डालना चाहिए उबटन से स्नान कर…	NOT	NONE	hasoc_2020_hi_1377
1127550340327444480	RT @SheilaDikshit: तुम तो सब को लाजवाब कर देते हो https://t.co/wGZ188xIXs	NOT	NONE	hasoc_2020_hi_568
1123706361366315008	RT @TejBahudur: सेना के सिपाहियों का ये हाल होता है, आज से नही कई सरकारों से, लेकिन अगर कोई हिम्मत करके सिपाही इसके खिलाफ बोल दे तो देशद्रो…	NOT	NONE	hasoc_2020_hi_2158
1123590841832886273	@ArunNayyer2 @ZeeNewsHindi @IndiaToday @aajtak @TimesNow @abpnewstv कब तक चलेगी ये मनमानी मोदी की Bjp भगाओ देश बचाओ	NOT	NONE	hasoc_2020_hi_3651
1123652225492873216	RT @AchAnkurArya: सीधे काबा में खडे होकर अल्ला से सीधे मोदी के खात्मे की यह दुआ बताती है कि मोदी को हटाना मुसलमानों के वश की बात नही, शायद…	HOF	HATE	hasoc_2020_hi_3836
1127589011810164736	@AlkaMehta19 नजरों को तेरे प्यार से इंकार नहीं है, अब मुझे किसी और का इंतज़ार नहीं है, खामोश अगर हूँ मैं तो ये वजूद है मेरा तुम ये न समझना कि तुमसे प्यार नहीं है। https://t.co/6t78HusAIY	NOT	NONE	hasoc_2020_hi_1797
1123745070606426114	RT @JEMMasoodAzhar: मैं #MasoodAzhar पूरे मुस्लिम आवाम को संदेश देना चाहता हु और ये कहना चाहता हु की मुझे Global terrorist घोषित करने के पी…	HOF	OFFN	hasoc_2020_hi_132
1127642958944186371	संजय दत्‍त बच्‍चे की तरह हैं: अर्जुन कपूर https://t.co/RSZ6j80XUQ	NOT	NONE	hasoc_2020_hi_2055
1127557093169328128	RT @sudhirchaudhary: बनारस में कुल्हड़ की चाय और कचौड़ी के बिना दिन अधूरा रहेगा।@vishalpandeyk के साथ सड़क किनारे चाय पर चर्चा। https://t.c…	NOT	NONE	hasoc_2020_hi_632
1127621412812759040	@ppbajpai क्या ज़माना आ गया भई!हद कर दी आप ने.. हर न्यूज़ वाले ने धक्का मार कर बाहर कर दिया और अब फ़ेसबुक अड्डा जमा दिया..लगता है अब "जुकरबर्ग" बैन लगयेगा तभी कुछ समझ आएगा।	NOT	NONE	hasoc_2020_hi_4117
1127800555726761984	एक तन्हा रात में तुम्हारी याद आ गयी, याद भुलाने के लिए हमने एक शमां जला दी, क्या कायनात दिखा दी उस शमां ने हमको, उसके उठते धुएं ने तुम्हारी तस्वीर ही बना दी…	NOT	NONE	hasoc_2020_hi_690
1123607161869717505	@Rammehar00 @bunty_ki_babli @babli_ka_bunty 😂😂😂😂😂 जलने की बदबू आने लगी है	NOT	NONE	hasoc_2020_hi_773
1127495508199481344	RT @JoinDesi: 5 घन्टो का मेकअप.... 10000 का पार्लरका खर्चा और... भोसडीके ने... 2 मिनिट मे पुरा पॅकेज खोल कर रख दिया.😂😂😂 👇👇👇👇 (आज का सवाल…	HOF	PRFN	hasoc_2020_hi_353
1127541087705296898	RT @rishibagree: ऐसा पहली बार हो रहा है कि आज़मगढ़ की 140 बूथों पर बूथ कैप्चरिंग नहीं हो पा रही है। अखिलेश यादव जब ये कहते पाए गए कि आज़मग…	NOT	NONE	hasoc_2020_hi_422
1127606770497507328	RT @DesiStupides: चुनाव आयोग का नाम सुना है ? उसका एक नियम है वोटिंग से 48 घंटे पहले पोलिंग बूथ के पास किसी पार्टी का पोस्टर नहीं लगा होना…	NOT	NONE	hasoc_2020_hi_241
1127623421876002818	@umashankarsingh अब आप बाहर निकल सकते हो कोई नहीं देख पाएगा...	NOT	NONE	hasoc_2020_hi_2600
1127515078797012993	RT @halima7620: uff dil to karta hai pore twitter ko moj karwa du per kiya karu log ratween kam karte hain warna har ghar me ja kar free me…	NOT	NONE	hasoc_2020_hi_2343
1127586977576996864	यह चेहरा कह रहा कि इनकी लुटिया भी राहुल डुबो चुका! #आयेगा_तो_मोदी_ही	HOF	OFFN	hasoc_2020_hi_529
1123481664116744194	RT @soniya2250: रेगिस्तान भी हरे हो जाते हैं जब..🌿🌳 "अपनों" के साथ "अपने" खड़े हो जाते हैं🙏 https://t.co/vEFEzmARpe	NOT	NONE	hasoc_2020_hi_2938
1127603704448684032	RT @kanchanad123: #MothersDaySpecial गुरु द्वारा बताई गई मर्यादा में रहकर भक्ति करता हुआ शिष्य गुरु को मां से 100 गुना ज्यादा प्रिय होता है…	NOT	NONE	hasoc_2020_hi_189
1127594539886104578	RT @KadiyaTrupti: एयर स्ट्राइक के बाद दो जगह मातम छा गया था, एक पाकिस्तान में और दूसरा राहुल बाबा एंड कंपनी के यहां। राहुल बाबा कान खोल के…	HOF	OFFN	hasoc_2020_hi_4375
1127493276796243968	RT @kumarshashwat97: बस इनका यही कहना बांकी रह गया है कि अभिनंदन की शक्ल में विमान का पायलट यही था। फेंकने की भी सीमा होती है भाई !!!! 😂😂😂…	NOT	NONE	hasoc_2020_hi_3884
1127489493550845952	मेरे देश हर मतदाता पढा लिखा होशियार है राम क्रष्ण नर देव की गिनती मतदान स्वीकार करो अपने वोट की कीमत समझो भारत का उद्दार करो,,जाति धर्म मजहब से ऊपर उठकर सोच विचार करो,,जिसके हाथो देश सुरक्षित उसको चौकीदार करो चरित्र वान और देश पुजारी गद्दी का हकदार है,मै भी चौकीदार हू तुम भी चौ,,	NOT	NONE	hasoc_2020_hi_3552
1127553473476644864	RT @IqbalShahfahad: ↕️⬇️ 👉 सहाबी ने कहा जी आक़ा हुज़ूर आप रसूलल्लाह ﷺ ने कहा जाओ उनकी खिदमत करो अल्लाह तुम्हारे गुनाह मुआफ़ कर देगा 👐 👉 अ…	NOT	NONE	hasoc_2020_hi_3862
1127471663560310784	RT @TV9Bharatvarsh: मुझे हराने वाला कोई पैदा नहीं हुआ, ईश्वर के लिखे लेख को भी मैं मिटा सकता हूं- @nirahua1 #Phase6 #AadeshDeshKa #VotingRo…	NOT	NONE	hasoc_2020_hi_240
1127632313796317184	@AkhileshPSingh @bjp_ka1_virodhi काश आज कलाम साहब इस दुनिया में होते , तो साहब के रडार ज्ञान यानी कि "मोदीनोटिक्स" को जानकर अचंभित हो जाते और सोचते कि में रडार और बादलों के रिश्ते को नहीं समझ पाया लेकिन इस महान इंसान ने ये खोज कर डाली😀😀😀😀😀	HOF	OFFN	hasoc_2020_hi_2675
1127714715088515072	RT @DesiStupides: @yadavtejashwi वो भाजपाई बादल दिखा क्या जो रडार से बचा लेता है! 😂 😂 23 मई के बाद मोदीजी को रोजगार की चिंता नहीं होगी, अप…	HOF	OFFN	hasoc_2020_hi_1421
1127723330209902592	@sadhvi09 @priyankagandhi @INCIndia हर हर मोदी घर घर मोदी	NOT	NONE	hasoc_2020_hi_3484
1127510360196411394	RT @gops333: आप की रिश्वतखोरी देखिये, केजरीवाल और गोपाल राय का काला कारनामा 6करोड़ में पश्चिम दिल्ली का टिकट बेचा, बेटे ने किया भंडाफोड़..…	HOF	OFFN	hasoc_2020_hi_228
1127804334790533120	@Kavita_Sharma4 @chokidarsandhya लोग जख्मी होते है तीर तवर खंजर से, मैंने ज़ख्म खाया है यारों अपने दिलबर से, आए जो नज़र तुमको भोला - भाला बाहर से, झांक कर उसे यारों पहले देखो अंदर से।। था जो एक परदेसी ओ चला गया लेकिन, आती है वाफा की बू अब भी उसके बिस्तर से।।	NOT	NONE	hasoc_2020_hi_1057
1127620548794540032	RT @AmitShah: मोदी सरकार ने अमृतसर में IIM स्थापित किया, भटिंडा में AIIMS दिया, फिरोजपुर में PGI की स्थापना की जा रही है। मोदी जी ने जालि…	NOT	NONE	hasoc_2020_hi_792
1127584691689627648	ये मुस्कराहट सलामत रखना मेरे मौला ये फलीस्तीन पैगम्बरों की ज़मी है बंज़र जरूर है लेकिन बुज़दिल पैदा नहीं करती।। https://t.co/VliwD8Vjbu	NOT	NONE	hasoc_2020_hi_2439
1123621720315686912	RT @Priyankajit: भक्तों के अनुसार :----- वही सैनिक देशभक्त माना जाएगा जो चुपचाप ताबूत मे बंद होकर घर आएगा वह नहीं :-- जो भ्रष्…	HOF	HATE	hasoc_2020_hi_1895
1127602613946650624	RT @imsiddhu4u: राहुल, तूने मोदी जी को चोर कहा और उसने माफी मंगवा ली… अब मोदी जी ने तेरे बाप को चोर कहा, जा दम है तो मंगवा ले माफी…😂 @Rah…	HOF	OFFN	hasoc_2020_hi_213
1123627395225796608	RT @BebakAawaj: @RahulGandhi शर्म मोदी को आती नही? जनता के सामने खुलेआम झूठ बोलने का पेसा हो गया है। पुलवामा, छत्तीसगढ़, उड़ी, गढ़चिरौली,…	HOF	OFFN	hasoc_2020_hi_3296
1127752686110044160	कांग्रेस का हरामीपन देखिये, सिखों का नरसंहार करके भी सरदार मनमोहन सिंह से ही माफी मंगवाई, नेहरू परिवार ने माफ़ी नही मांगी।	HOF	HATE	hasoc_2020_hi_4344
1127484414236082177	RT @KuldeepKadyan: सरेआम 100 से ज्यादा हरियाणा के लोगों को गोलियों से भून डालने वाली सरकार सोच भी कैसे सकती है कि उनको वोट मिलने चाहिए??	NOT	NONE	hasoc_2020_hi_1191
1127543595873910786	RT @UrmileshJ: Namo Tv अब भी चल रहा है! इच्छा हुई तो 23 मई को चुनाव आचार संहिता का सम्मान करते हुए उसका प्रसारण बंद‌ होगा ! विपक्षी नेता के…	NOT	NONE	hasoc_2020_hi_2679
1127561409099751426	@ankit_rr हर बार ही होती है इतनी तो🤔	NOT	NONE	hasoc_2020_hi_3627
1127791428921372677	RT @JhaGunjesh: "ऐसा होते हुए भी संघ (RSS) एक राजनीतिक दल या राजनीतिक दल का हिस्सा नहीं बनता। वह संपूर्ण समाज का संगठन ही है। यही है भारत…	NOT	NONE	hasoc_2020_hi_3635
1127790539728756736	RT @Essdee59652254: वोट नहीं देने से नकारना नहीं होगा उल्टा जीसे आप नहीं चाहते वो जीत सकता है। अगर उसे हराने के लिए वोट करोगी तब उसे आप कम…	NOT	NONE	hasoc_2020_hi_1122
1127616123766067205	@AzmiShabana अच्छा मतलब मैडम को वीजा नही मिला अमेरिका का ,कोई बात नही पकिस्तान के लिये कोशिश करो	NOT	NONE	hasoc_2020_hi_1624
1127613909173714947	@jigneshmevani80 @aajtak @ndtv @sardesairajdeep देश में दलितों पर हो रहे अत्याचार शर्मनाक है पर उससे भी ज्यादा शर्मनाक जिग्नेश मेवानी के द्वारा दलितों की भावनाओं के साथ खेल कर की जाने वाली राजनीति है जो यह दर्शाने के लिए काफी है की उसे दलितों की कोई फिक्र नहीं है सिर्फ कांग्रेस की दलाली करनी है	NOT	NONE	hasoc_2020_hi_3829
1127463132341862400	RT @uN5hUMittal: @rssurjewala कहा से लाते हो इतना कमीनापन। तुम कांग्रेसी । MP , राजस्थान में हत्या , अपहरण, बलात्कार की बाड़ आ गयी है।…	HOF	HATE	hasoc_2020_hi_3212
1123819670484783105	RT @AnkitLal: .@narendramodi जी को सिपाही तेज बहादुर से इतना डर क्यूँ लगता है? अगर इस तरह रोज़ लोकतंत्र की हत्या होती रही और हम लोग चुप बै…	NOT	NONE	hasoc_2020_hi_158
1127534309710000129	RT @DilliDurAst: डिफेंस के रडार हैं टाटा स्काई की छतरी जो बादलों की वजह से काम नहीं कर पाते!!😬 https://t.co/cc387NFfgB	NOT	NONE	hasoc_2020_hi_2272
1123556784088555522	RT @Dil_se_re_: गरीबी लेती है हर इम्तिहान गरीबो की जानवरसे बत्तर हालत कर देती इंसानों की मजबूरी में जब बन्ध जाती बैलों की जगह सोचो कुछ तो…	NOT	NONE	hasoc_2020_hi_3202
1127596293134721024	@NeHa_Ji_ कुछ तो शर्म करो बोलना है तो साफ साफ बोलो पर कम से कम सरदार बोलना है तो इज्जत से बोलो क्योकि सारा देश सरदार के नाम से सिर्फ सरदार पटेल को जनता है समझे । और दूसरे सरदार सिख है तो कम से कम ऐसा न लिखे जिससे किसी को प्रॉब्लम हो जाये ।	NOT	NONE	hasoc_2020_hi_244
1127564756137566208	RT @jpchordiya_5: "बादलों में रडार काम नहीं करते" यह 'टेक्नोलॉजी' नहीं 'फेक्नोलॉजी' है	NOT	NONE	hasoc_2020_hi_2040
1123654834354188288	RT @IIGoDMomll: लो ये दो कौड़ी के आपिये बोल रहे है इनका भाव 10 करोड़ है लेकिन इनका मालिक कांग्रेस के सामने गठबंधन के लिए भीख माँगकर टीवी पर…	HOF	HATE	hasoc_2020_hi_1038
1123647309781164032	@RiyaNarayan6 Woh lassi nahi chaach hai🙄	NOT	NONE	hasoc_2020_hi_4330
1127571039204954112	RT @dilipmandal: अपने बेटे के बारे में कोई कहे तो तकलीफ होती है न @tavleen_singh? आप समझ सकती हैं कि देश में विचार-विमर्श का स्तर कहां चला…	NOT	NONE	hasoc_2020_hi_3226
1127812215896195072	RT @SevadalDD: "जीतेगा तो धोनी ही" की हालात देखकर, 👇 "आएगा तो मोदी ही" वालों में भय का माहौल ! 🤣	NOT	NONE	hasoc_2020_hi_1146
1127493809481191424	मुझे लगा है ! कि आप मुझे ही बोल रही हो 😀Baby आप यहा बाॅय फ्रेंड ढुंढने आइ हो क्या ?😉😀😁😂😃😄😅	NOT	NONE	hasoc_2020_hi_3632
1123523485504958464	@arunjaitley #Bjp_Govt_Slogans 2014-2019 :- राष्ट्रवाद :- हिंदुत्वा :- पाकिस्तान :- देशद्रोही :- टुकरे टुकरे गैंग :- वन्दे मातरम् किंतु मुद्दा है:- :- रोटी/कपड़ा/मकान :- किसान/नौजवान/छात्र :- रोज़गार भाजपा कर क्या रही है: 👉 कोंग्रेस के सरकार में सब सामान्य चल राह था किंतु हम ठगा गए।	NOT	NONE	hasoc_2020_hi_3546
1127498951706300416	RT @MLArajeshSP: एक जिम्मेदारी एक वचन दिया गया पता नही सहाब क्यों मुकर गये। शिक्षामित्रों को दुख होता कि काश उस समय आपका विश्वास नही किये…	NOT	NONE	hasoc_2020_hi_3016
1127606388824240128	@KapilMishra_IND हमनें सोचा झाड़ू लगी साफ सुथरी बटन को अपनी स्याही लगी उंगली से गंदा क्यों करना। इसलिए उंगली नहीं लगाई उस पर। 😏😏	NOT	NONE	hasoc_2020_hi_2472
1127476210177495040	tmc का आतंग कब का सहेंगे हम	HOF	HATE	hasoc_2020_hi_4227
1127599870871732225	RT @BK_Bhartiy2: अब यदि कोई बहन जी बोलेगा तो तो गोली मार दूँगी !! ससुरें ने बहन जी बोल-बोलकर जीवन भर कुंवारी रख दिया😂😂😜😜😀😁😉 https://t.co/…	HOF	OFFN	hasoc_2020_hi_4059
1123762191751090177	RT @GunjanPandya7: क्या राहुल गांधी की ये कम्पनी और ब्रिटिश नागरिकता देश के लोगों को धोखा और संविधान का मज़ाक़ उड़ाना नही है,क्या ये सारी…	NOT	NONE	hasoc_2020_hi_2006
1123634231937122304	चुनाव आयोग ने पाकिस्तानी अंपायर शकूर राणा की याद दिला दी। @shuvankr dada	NOT	NONE	hasoc_2020_hi_2891
1127568493250064384	एक बार फिर एक साथ स्पॉट हुए मलाइका अरोड़ा और अर्जुन कपूर, मीडिया कैमरों से बचते नजर आए https://t.co/80YDPOc490	NOT	NONE	hasoc_2020_hi_4216
1127558594721865728	@ArvindKejriwal हूतिए अगर तेरे मां बाप ने बुजुर्गों की इज्जत करना सिखाया होता तो मोदी जी को coward और psychopath ना कहता तु। तु तो अपनी पार्टी की औरतों का भी सम्मान नहीं करता। 😠	HOF	OFFN	hasoc_2020_hi_1419
1127615586928738304	RT @waishkh76232335: ये मुस्कराहट सलामत रखना मेरे मौला ये फलीस्तीन पैगम्बरों की ज़मी है बंज़र जरूर है लेकिन बुज़दिल पैदा नहीं करती।। http…	NOT	NONE	hasoc_2020_hi_142
1127601410156126209	@Rofl_Rajasthani चक्रवात आयेगा😂	NOT	NONE	hasoc_2020_hi_486
1127790342609166336	RT @atulbegwani5454: 23मई के बाद हम मोदी भक्त क्या करेंगें ? 😀	NOT	NONE	hasoc_2020_hi_1384
1127520380409614336	@romanaisarkhan @abpnewshindi @abpnewstv तुम तो कांग्रेस को वोट देकर आयी होगी हिन्दुवो और राम से तुमको भी दिक्कत् है	NOT	NONE	hasoc_2020_hi_137
1127618967541911552	RT @yadavdimples: मुझे हराने वाला कोई पैदा नहीं हुआ, मैं ईश्वर के लिखे लेख को भी मिटा सकता हूँ : निरहुआ भगवान को चुनौती भाजपाई ही दे सकते…	NOT	NONE	hasoc_2020_hi_470
1123772530727297024	खुजलीवाल को करवाकर आशावादी बना दो ।	HOF	OFFN	hasoc_2020_hi_3399
1127522968307847168	अरे @RahulGandhi जी आप कहते हैं की @narendramodi जी में नफ़रत हैं और आप उन्हें सिर्फ़ प्यार देंगे इसीलिए झप्पी भी दी ,आँख भी मार दी लेकिन ये बताइए क्या वोट भी आज मोदी जी को दे दिया ? आप दे भी सकते हो 😜	NOT	NONE	hasoc_2020_hi_2968
1123495664690667520	RT @sushilk03017575: @DhananjayPraj15 सर, आज कल की शिक्षा प्रणाली एक व्यापार की तरह ही बन कर रह गई है। बच्चे अपने संस्कार और संस्कृति को…	NOT	NONE	hasoc_2020_hi_2904
1123594016954638338	अब कोई नहीं बोलेगा सब के मुँह पर गोदरेज के ताले लटक जायेंगे	NOT	NONE	hasoc_2020_hi_1001
1127605226997813248	@ShilpiSinghINC @RahulGandhi @priyankagandhi @INCIndia इस गधी को किसने गणित पढ़ाया है बे ।😁😁 https://t.co/pI5SfESMCr	HOF	OFFN	hasoc_2020_hi_3286
1127656368125530112	@TRIPATHI_AVI_ @ArvindKejriwal @DrKumarVishwas में जब भी पुथ्वीराज चौहान के बारे में पढता हू सोचने पे मजबूर हो जाता हूं कि ईतना वीर कयी बार मुहम्मद गौरी से जीयने के बाद भी आखिर कार हार कयों गया ? कारण था "जयचंद की गद्दारी" आज फिर से पुथ्वीराज चौहान(Modi)मैंदान में और जयचंद (Kejriwal) भी घर मे बैठा है India Be Careful !!!	HOF	OFFN	hasoc_2020_hi_2061
1127635857970622464	RT @sambit_swaraj1: इसको संभालो बे चमचो , पता नही कहा मुह काला करवा के आया है। 🤣😂🤣😂🤣😂🤣😂🤣😂 https://t.co/3YNYpQeh3Q	HOF	PRFN	hasoc_2020_hi_609
1127803567232831488	किस देश कि बात कर रही है यहां चमचों और दलालो कि भीड़ ने खुद को गुलाम मान लिया है	HOF	HATE	hasoc_2020_hi_1206
1123492552533999620	RT @nidhidynamic: दादी जैसी नाक है तेरी, मलिंगा जैसे बाल! पीहर तेरा चोर प्रियंका, डाकू है ससुराल.. एक तू ही धनवान है गौरी, बाकी सब कंगाल..😂…	HOF	OFFN	hasoc_2020_hi_1586
1127521219274665984	श्रीलंका / राष्ट्रपति ने कहा- आतंकवाद के खात्मे तक न तो भागूंगा और न ही इस्तीफा दूंगा https://t.co/9boZnysMXA	NOT	NONE	hasoc_2020_hi_3318
1123649285268987905	RT @ZubinaAhmd: समझ नहीं आ रहा ये मोदी चीन को कौन सा जूता सुंघाया है कि उसकी मिर्गी ठीक हो गई। मसूद अजहर पर UN कौंसिल ने साल भर के अंदर तीस…	HOF	OFFN	hasoc_2020_hi_4096
1127565502732070912	RT @Interceptors: आज भी 40% लोग वोट डालने नही गए। यही 40% अगले 5 साल तक सरकार को ज्ञान देंगे।	NOT	NONE	hasoc_2020_hi_3430
1127796323657191424	RT @ETHindi: गर्मी छुट्टी की भीड़ और डायनैमिक प्राइसिंग से हवाई किराया से भी महंगे हुए ट्रेन टिकट https://t.co/MK0MfJfarm via @NavbharatTim…	NOT	NONE	hasoc_2020_hi_3240
1123585359890096128	RT @BJPLive: कांग्रेस का एक और कल्चर है योजनाओं को लटकाने और भटकाने का। आज मध्य प्रदेश में पानी की किल्लत है, तो इसके पीछे कांग्रेस की यही…	NOT	NONE	hasoc_2020_hi_3792
1127526080485531649	@Jitendr14272284 @Pinkimishr क्या आपने किसी मुसलमान को "इस्लामिक आतंकवाद" को सच साबित करते देखा? परन्तु आपने एक हिन्दू को "भगवा आतंकवाद" को प्रमाणित करने के लिए अदालत जाते जरुर देखा होगा! यही अंतर है.	HOF	HATE	hasoc_2020_hi_1067
1123617718928674816	@LambaAlka तुम्हारा रिस्तेदार आतंकी घोसित हो गया हल्का .....थोरा सा रो लो , नहीं तो पेमेंट नहीं मिलेगा ।	HOF	OFFN	hasoc_2020_hi_910
1127753596299169793	RT @Maya_World1: तुम सोच भी नहीं सकते हम कितना सोचते है तुम्हें।	NOT	NONE	hasoc_2020_hi_546
1123577201968861184	RT @mntlive: बुर्का बैन को साध्वी प्रज्ञा ने बताया राष्ट्रहित में जरूरी, BJP ने किया विरोध https://t.co/HMqwM93Idg @ali786_rahim @ALIMUKTED…	HOF	HATE	hasoc_2020_hi_571
1127634150914252801	RT @RinkuSharma0123: मोदी'' जी की "जरुरतें "कम" हैं इसलिये उनके "जमीर" में "दम' है सहमत हैं तो "रिटवीट" जरुर करें🙏	NOT	NONE	hasoc_2020_hi_1418
1123544285066870784	@aajtak @PankajJainClick हमें सबूत चाहिए 😂😂	NOT	NONE	hasoc_2020_hi_2599
1127523249317982208	@_mayymunay @Bamitsmahnoor Hamy apni izzat pyari hai😪	NOT	NONE	hasoc_2020_hi_2295
1123522856355131392	@DurgaKali9 @ShilpiSinghINC हमें लगा शेरनी जंगल में कहीं खो गई थी.	NOT	NONE	hasoc_2020_hi_845
1123560215025262593	RT @malang_77: @MalayMi07748764 मोदी ??? मोदी ने ऐसे ऐसे इंटरव्यू दिए हैं जो इसका बाप नहीं दे सकता...ये है क्या ?? इसका इंटरव्यू कोई ढंग का…	NOT	NONE	hasoc_2020_hi_1928
1127571676764393472	RT @Republic_Bharat: #May23WithArnab | जो चाँदी का चम्मच लेकर पैदा हुए, औऱ जिन्होंने गरीब के नाम पर राजनीति करके खुद के लिए चाँदी के चम्मच…	NOT	NONE	hasoc_2020_hi_2382
1127644225619865601	गंभीर बात। प्रोपैगैंडा की प्रेरणा अमरीका (जहाँ से हम ये वॉर रूम और उसका पूरी कहानी कहना सीखे हैं) में भी पूरा प्रोपैगैंडा मशीनरी के द्वारा फैलाया जाता है और उस मशीनरी में बड़ा हाथ वहाँ की फिल्मों का भी रहता है। कभी... https://t.co/8ODw4YBdep	NOT	NONE	hasoc_2020_hi_4159
1123486512740483074	इसमें भी कोई शक की गुंजाइश रह गयी है क्या 😂😂	NOT	NONE	hasoc_2020_hi_2943
1127637409867296769	RT @lolmaal: पहले लोग झूठ बोलते थे तो, मीडिया सच ढूंढ कर लाती थी... अब मीडिया झूठ बोलती है और... हम लोग सच ढूंढ कर लाते हैं ! 😂😂	NOT	NONE	hasoc_2020_hi_2383
1127765692646748160	@NyLahBaLoch @patelwoodcrafts Sarah hai	NOT	NONE	hasoc_2020_hi_729
1127609178015424513	RT @JyotsnaTak: Aisa kaam to BJP ka 56 inch ke seene wala leader hi Kar sakta Hai, aur kismat se sabhi BJP leaders ka Seena 56 inch ka Hai,…	HOF	OFFN	hasoc_2020_hi_532
1127563485263605761	RT @bhavsarhardiik: इनके चहेरे बता रहे हे की... #AayegaTohModiHi 😍✌ https://t.co/yameplIqxw	NOT	NONE	hasoc_2020_hi_355
1127791730902745088	@chowkid87435826 @karanslove @Sampat_Saral @sardanarohit @vinodkapri @sakshijoshii @khanumarfa @zoo_bear @umashankarsingh @bainjal @jainendrakumar @MamataOfficial @msisodia @pankhuripathak मोदी तो चोर है इसमें कोई किन्तु परंतु नहीं है रोहिंगिया या बंगला देशी मुस्लिम ही क्यू बंगला देशी हिन्दू को भी बाहर निकालना चाहिए। तड़ीपार बोलता है हम सिर्फ मुस्लिम को बाहर निकलेंगे वो ठीक है साला तड़ीपार पूरे द…	HOF	HATE	hasoc_2020_hi_3571
1127465367901622272	साहेब ने सब कुछ तो लगभग सुना ही दिया है अब बस यही सुनाना बाक़ी रह गया है, अगर मुझे #वोट नहीं दिया तो मेरा मरा हुआ मुंह देखोगे। 🤣😂😂	NOT	NONE	hasoc_2020_hi_4144
1127617419843756032	@vikrameffects @vijayment @DrKumarVishwas डीपी तो अपनी अब्बा हुज़ूर की लगाया https://t.co/5aprWLgaXw	NOT	NONE	hasoc_2020_hi_1551
1127607160546910208	अब क्या ऐसे आलसी लोगो के लिए भी मोदीजी दोषी है ?? 😉😉😉😉	NOT	NONE	hasoc_2020_hi_4254
1127732943550443520	RT @rohanrgupta: न नियत है न क़ाबिलियत है, मोदी जी को बस सत्ता पाने की लालच है! सत्ता पाने के लिए इनका अपमान, नहीं सहेगा हिंदुस्तान! https…	HOF	OFFN	hasoc_2020_hi_372
1127597857593106432	RT @BJP4India: पाकिस्तान के पाले पोसे आतंकी जब यहां पर हमला करते थे तो ये निर्दोषों को जेल में ढूस देते थे। हिंदू आतंकवाद का कुतर्क करने…	NOT	NONE	hasoc_2020_hi_2661
1127496854571110401	RT @narendramodi_in: तब तो बबुआ भी बुआ के उस घोटाले की जांच कराने के ऐलान करके गए थे। लेकिन हुआ क्या? बुआ और बबुआ ने आज खुद हाथ मिला लि…	NOT	NONE	hasoc_2020_hi_1638
1127665448785301504	RT @Mdhaka5: ये गलत कर रहा है इसके खिलाफ fir होनी चाहिए असावटी गाँव जिला पलवल की बता रहे है https://t.co/ZhhD0Hkut4	NOT	NONE	hasoc_2020_hi_3302
1123787193980526594	RT @SushantBSinha: आतंकी मसूद अजहर पर बैन को लेकर अड़ियल चीन के रुख में अचानक आई नर्मी इस बात का संकेत है कि उसके पास भी यही रिपोर्ट पहुंच…	NOT	NONE	hasoc_2020_hi_89
1127764124006375425	RT @NidhiSi22101: पार्टी का चुनाव चिन्ह "झाड़ू से हैलमेट" कर लो… दिनभर लगा के घूमना प्रचार भी होता रहेगा और सेफ्टी भी बनी रहेगी घुँघरू सेठ…	NOT	NONE	hasoc_2020_hi_1491
1127743232169787393	ये क्या है @ArvindKejriwal https://t.co/3zT9LfxLEg	NOT	NONE	hasoc_2020_hi_2444
1127618074134306816	RT @seematri6: दलाल भी थे ? ? ? 🤔🤔🤔 ऐ पप्पू क पापा तुझे, क्या क्या कहूं, क्या ना कहूं. . ! 🙏🙏😡😡 https://t.co/k7w8bOSE1M	HOF	PRFN	hasoc_2020_hi_3311
1123599045912489984	RT @ashutosh83B: तेज़ बहादुर का नामाँकन खारिज, सुप्रीम कोर्ट में करेंगे अपील https://t.co/x0Stfapxiq	NOT	NONE	hasoc_2020_hi_1700
1127794549483380736	RT @Brijesh_Jaat: तबियत ठीक नही रहती अब बिल्कुल भी जब से तुमने हाल पूछना बन्द किया है #Guddu 😘❤️ https://t.co/tLqMiMSq05	NOT	NONE	hasoc_2020_hi_873
1123610907395940352	@Varun70055420 @BJP4India @yadavakhilesh जल्दी आ बे रंडी की औलाद	HOF	PRFN	hasoc_2020_hi_13
1127613263271739392	RT @ArunbajpaiRajan: पुश्तों से अमेठी की सेवा की है:- प्रियंका वाड्रा टूटी सड़कें,जर्जर अस्पताल,न उद्योग,न व्यापार, बिजली बेहाल, इसे सेवा…	NOT	NONE	hasoc_2020_hi_2208
1127581269112442881	RT @MadhuCh11933439: अबकी बार 400 पार 😊😊 हर हर मोदी🙏 @narendramodi @RahulGandhi https://t.co/uzPkmszSrr	NOT	NONE	hasoc_2020_hi_4008
1127600973956898816	RT @anuragspparty: धूप से जलती सड़क पर स्कूटर सवार को मेट्रो की छाया..मेट्रो का एक फ़ायदा ये भी है#कामबोलताहै ⁦@yadavakhilesh⁩ ⁦@myogiadity…	NOT	NONE	hasoc_2020_hi_363
1127794897598107648	RT @Kauchaubey77: @abhisar_sharma तू पगार काटेगा जो खुद दूसरे के दलाली पर चल रहा है वो पगार की बात करते हैं	HOF	OFFN	hasoc_2020_hi_238
1123797478443225089	RT @HindiJKR: आचार संहिता उल्लंघन के एक और मामले में पीएम मोदी को मिली ‘क्लीनचिट’, राहुल गांधी को चुनाव आयोग ने भेजा कारण बताओ नोटिस #Elect…	NOT	NONE	hasoc_2020_hi_4215
1123565852182306816	RT @Pinkimishr: एक बाबरी टूटी थी मुसलमान आज तक भाजपा को वोट नहीं देता। लाखों मंदिर कांग्रेस ने तुड़वाए फिर भी हिंदू समझते नहीं।।	HOF	HATE	hasoc_2020_hi_572
1127739314702438400	RT @Rajniin48551148: #RespectMothersSaysStRamRahim #MothersDay उसके रहते जीवन में कोई गम नहीं होता, दुनिया साथ दे ना दे पर मां का प्यार क…	NOT	NONE	hasoc_2020_hi_3528
1123610882238320641	हमारे साथ न्याय कर	NOT	NONE	hasoc_2020_hi_2694
1123627739137732608	RT @MPRakeshSingh: आज संयुक्त राष्ट्र ने आतंकी #MasoodAzhar को अंतर्राष्ट्रीय आतंकवादी घोषित कर दिया है। यह मोदी सरकार की विदेश और कूटनीति…	NOT	NONE	hasoc_2020_hi_714
1127620808808050689	ये देखो तथाकथित पिछड़े समाज का नेता जो पिछड़ी जाति की नेता के ख़िलाफ़ ब्राह्मण का सपोर्ट करेगा।इस दोगले नेता की दुकान भी इस बार बंद ही हो जायेगी।	HOF	OFFN	hasoc_2020_hi_2145
1127617570838736896	कठुआ मामले में सड़को पर उतरे तमाम तथाकथित #बुद्धिजीवी, #Celebs इस बार वो तेजी या वो आक्रोश नहीं दिखा रहे हैं ,,😠😠😠 कश्मीर में 3 साल की बच्ची से बलात्कार.. बलात्कारी का नाम ताहिर अहमद जिसने रोज़ा इफ्तारी से पहले दिखाई थी टॉफी!!	NOT	NONE	hasoc_2020_hi_1117
1127574331742023680	RT @Jansatta: बीजेपी प्रत्याशी निरहुआ का कॉन्फिडेंस- कोई हराने वाला पैदा नहीं हुआ, भगवान का लिखा भी मिटा सकता हूं https://t.co/TfsrlO3IJN	NOT	NONE	hasoc_2020_hi_593
1127789268846481411	RT @Shivani_Bhabhi: ननदोई जी ने कर दी मेरी चूत चुदाई और मैं गर्भवती हो गई https://t.co/2en7WMShui https://t.co/tKL3voClkQ	HOF	PRFN	hasoc_2020_hi_1820
1127505964599349249	RT @Rekha33695940: #Allah_Kabir कबीर जी ने समझाया है कि हे मानव शरीर धारी प्राणी! यह मानव जन्म बहुत युगों पर्यन्त प्राप्त होता है। तत्व द…	NOT	NONE	hasoc_2020_hi_3004
1127573270570553344	RT @suhana7880: अबे तेरी औकात क्या है है बे भारत के टुकडे पे पलने वाले पालतु कुत्ते तेरी भाषा किससे मिल रही हमे पता है तू हमे ज्ञान देगा 5…	NOT	NONE	hasoc_2020_hi_1197
1127555394442653696	@anuragspparty @yadavakhilesh @ndtv @Mayawati @RahulGandhi @anuragspparty @yadavakhilesh तुमरे akal-less भैया भी यही कर रहे होते अगर मुलायम सिंह यादव की औलाद ना होते. #totichor	HOF	OFFN	hasoc_2020_hi_1393
1123789320496791552	RT @sambit_swaraj1: कांग्रेस अब खुल कर नक्सलवादियों के साथ खड़ी हो गई, उधर नक्सलवादियों ने हमारे जवानों को शहीद किया और कांग्रेस के राजबब्ब…	NOT	NONE	hasoc_2020_hi_155
1127755995428425729	RT @RaiSahab20: तुम बेशर्म हो ! हो तो हो ! फिर यह भी मानो राजीव गांधी भ्रष्टाचारी था, सिखों के नरसंहार का दोषी था । https://t.co/my4JYixtPQ	HOF	OFFN	hasoc_2020_hi_3197
1127806784263999488	@agrey_sangita @Rajeshw89110436 हर हर महादेव 🙏	NOT	NONE	hasoc_2020_hi_2188
1127467108546355200	Radar, clouds, बादल, Modi - ऐसे रोमांटिक मौसम में एक गाना याद आ रहा है, आप भी सुनिये- https://t.co/v1HPGNcLx1	NOT	NONE	hasoc_2020_hi_1782
1127773833811845120	RT @beingAAPian: जंगल जाना तेरे बस का नहीं, वहाँ वीर जाते है वाकवीर नही और वैसे भी तुम विलासिता मे इतने लीन हो गये हो की बहुत शीघ्र लक्ष्मी…	NOT	NONE	hasoc_2020_hi_1691
1127520686598017024	हमने सर्वधर्म सदभाव ओर समुचित विकास के लिए वोट किया आपने भी वोट डाल दिया होगा यदि नही तो जरूर वोट करे यह विनती करता हूँ वोटिंग का समय सायं 6 बजे तक का है कृपया अपने साथ आई डी प्रूफ ले जाना न भूले https://t.co/MxUtFODF4i	NOT	NONE	hasoc_2020_hi_3477
1123496595847172096	@Asrathour_143 और हिंदी में 😜😜	NOT	NONE	hasoc_2020_hi_3784
1127466462644527104	RT @S_R_Amina: माँ बाप जैसी कोई दौलत नही♥️♥️ https://t.co/LxV0HB2KDv	NOT	NONE	hasoc_2020_hi_2415
1127562902242713600	RT @siya2902: मेरे दिन के ख्यालो मे मेरे रात के ख्वाबों मे मेरी सुबह मेरी शाम मे मेरे हर पल के इंतजार मे कभी #खुशी बनके तो कभी गम बनके हर प…	NOT	NONE	hasoc_2020_hi_1217
1127650944898850817	@anjanaomkashyap विश्वास नही हो रहा... सच मे... मुझे लगता था आप शादीशुदा नही है..🤔🤔	NOT	NONE	hasoc_2020_hi_2483
1127767961781932032	RT @TejBahudur: मुझे हराने वाला कोई पैदा नहीं हुआ, मैं ईश्वर के लिखे लेख को भी मिटा सकता हूँ : निरहुआ भगवान को चुनौती भाजपाई ही दे सकते…	NOT	NONE	hasoc_2020_hi_2135
1127637703460294659	@chulbulThurram @kapsology और इस गरीब प्राणी के पास उस समय डिजिटल कैमरा खरीदने के पैसे थे।	NOT	NONE	hasoc_2020_hi_173
1123808396212412416	@PerilousPooja @OnlineRajan__ @09_rkg @RssKanishk @ImROOcky @rjraunac @Kamallochanm @IKaransharma27 @Muaaaahrwadi @NitinUploader किसके हाथ क्या लगा वो बात नहीं! में ये सोच रहा अगर तु किसी थानेदार के हाथ लगी तो तेरा क्या होगा 😂😊😊😂😂😂	NOT	NONE	hasoc_2020_hi_2784
1127490265290301445	अमेरिका: टीचर ने स्टूडेंट को कहा 'ब्लडी इंडियन' तो दूसरी छात्रा... https://t.co/z9twKWITzy	HOF	PRFN	hasoc_2020_hi_1170
1127588521055641605	RT @cgalgale1: रोहींग्या तथा बांग्लादेशी हर तरह के मोबाइल रिचार्ज और चार्जिंग की सुविधा आसानी से प्राप्त करते है, . लुटीयन्स पत्रकारों को इ…	NOT	NONE	hasoc_2020_hi_1594
1127476407314132992	RT @BJP4India: मन किया तो नहाओ, नहीं तो ऐसे ही चले जाओ, ब्रेकफास्ट कर लो या लंच करलो टाइम ही टाइम है, ट्रेन से जाओ, प्लेन से जाओ या बस से…	NOT	NONE	hasoc_2020_hi_1538
1127550461957951489	RT @anjanakashyap_: साइकिल, हाथी, लालटेन, झाड़ू, पंजा इनको मिलाकर सर्कस चलाया जा सकता है सरकार नहीं 🇮🇳 जब बिल्ली, बन्दर, लोमड़ी, सियार,…	NOT	NONE	hasoc_2020_hi_1341
1123814880585367554	@yadavdimples @yadavakhilesh कौन देश भक्त और कौन देशद्रोही है ये देश की जनता सब जानती है 500 पाकिस्तानी फ्रेंड लिस्ट में रखने का क्या मतलब हो सकता है	NOT	NONE	hasoc_2020_hi_68
1127506828592652289	RT @R__katAria: @umashankarsingh @TIME ठीक वैसे ही गोमूत्र को ना ना और पप्पू मूत्र को हा हा ___ दल्ले में दल्ला उमाशंकर दल्ला _ 😅	HOF	OFFN	hasoc_2020_hi_4082
1123646546405289985	RT @metoovali: यूएन ने मसूद अज़हर को वैश्विक आतंकी घोषित किया। उसके संभावित परिणाम : 1. सोनिया और राहुल जी ने रात का खाना खाने से किया इं…	HOF	OFFN	hasoc_2020_hi_3454
1127805333026553856	RT @Victimbypolice: ग्रेटर नोएडा में दबंगो ने सड़क पर एक युवती को पीटा अपना वेतन मांगने को लेकर बीच रोड पर युवती की पिटाई दबंगो ने लाठी डं…	HOF	HATE	hasoc_2020_hi_382
1127466177398235136	RT @AagayiNavya: दुर्योधन - हे कर्ण,आज अर्जुन पर चला दो ब्रह्मास्त्र नहीं चला सकता मित्र क्यों? आज बादल बहुत हैं	NOT	NONE	hasoc_2020_hi_1463
1123507719128829952	@yadavtejashwi @NitishKumar अब @girirajsinghbjp जी इन्हें कब पाकिस्तान भेज रहे हैं	HOF	OFFN	hasoc_2020_hi_127
1127511618496024576	@ashokgehlot51 जी @SachinPilot जी अब शराब बन्द कब कर रहे हो राजस्थान में ।नशा मुक्त कर दो राजस्थान को।	NOT	NONE	hasoc_2020_hi_2785
1127466462610743298	कुछ लोग अपने देश को भी अपनी मा समझते तो शायद देश मैं कभी आतंक ओर हिंसा ना हो। क्यूंकि भारत माता के पुत्र से जायदा दुश्मन ब्रहे हुए है। #happymothersday	NOT	NONE	hasoc_2020_hi_3113
1123603663815995394	@aajtak Desh ka sath or vikash kariye g	NOT	NONE	hasoc_2020_hi_131
1123517848356188160	RT @farah17khan: लग तो मोदी जी रहे हैं? 🤔 https://t.co/HMQWhcFWXd	NOT	NONE	hasoc_2020_hi_2956
1123512089580933122	RT @BJP4India: बहन जी ने बाबा साहब के नाम का उपयोग किया और सपा ने लोहिया जी के नाम का उपयोग किया, लेकिन उनके आदर्शों के विपरीत हर काम किया।…	NOT	NONE	hasoc_2020_hi_2184
1123623997810196480	@Meenakshi7771 @SMehta1950 तुम फॉलो दो या ना दो इसका हमे गम नही ओके लेकिन तोहर पप्पूवा कबो पास नही होसकत ई बात अपने गांठ में आप बांध के हमके 23 के जवाब दा... ठीक है हाँ ठीक है 😜😜😜😜😜😜😜😝😝😝😝😝😝😝😝😂😂😂😂😂😂😂😂😂😂😂 #हेराम #हरेहरे	NOT	NONE	hasoc_2020_hi_2587
1123514996258816002	@ugly_d_pagli गलती से	NOT	NONE	hasoc_2020_hi_2363
1127762773423714304	@Priyanka_4India RIP#; आलू से सोना बनाने वाली मशीन😢	NOT	NONE	hasoc_2020_hi_319
1127630971640139776	,,जीवन मे बहुत कुछ देखा है ,बस अब यही ,देखना बाकि था । ऐसा लगता है बारात @badri_dk भैया के गांव से था 😀😁😂😉😋 https://t.co/9YjptXBdLH	NOT	NONE	hasoc_2020_hi_869
1127482107390046208	RT @Devendr68793623: #HappyMothersDay2019 मां हमारे पाप कर्मो को नही काट सकती है https://t.co/O9O5Oddr9D	NOT	NONE	hasoc_2020_hi_443
1123561469134532608	RT @brawling_virago: सोचता हूँ कि वो कितने मासूम थे क्या से क्या हो गया देखते देखते https://t.co/jCLRJensWK	NOT	NONE	hasoc_2020_hi_399
1127477132924342272	RT @Sapna_3: आज आपका एक सही वोट आपकी माताओं व बहनों की सुरक्षा सुनिश्चित करेगा और गलत वोट उनकी मर्यादा,सम्मान को खतरे में डाल सकता है। ऋ…	NOT	NONE	hasoc_2020_hi_3687
1123826054207016960	RT @Vijayjadav123: यह नहीं देखा तो कुछ भी नहीं देखा https://t.co/IZrGVSOvCv	NOT	NONE	hasoc_2020_hi_4349
1127779265447989248	RT @Ajay__253: झलकता हैं #प्यार #आँखों से, और #वो कहती हैं #इश्क़ नहीं है, #दिन शुरू होता हैं #बातों से, और #वो कहती हैं #इश्क़ नहीं है,…	NOT	NONE	hasoc_2020_hi_322
1127533911221817344	@sherryontopp अपने आप को बिल्कुल सही आंके हो। न केवल तुम बल्कि पप्पू का वो बहन भी चुनावी मेढक है जो बस टर्र टर्र करना जानते हो	HOF	OFFN	hasoc_2020_hi_4218
1127811322496741377	RT @MrinalPande1: १९८८ की बात है, बैठे बैठे मेरे मन में ख़्याल आया मित्रो, कि अगर 'इ' से इमली होती है, तो 'ई' से ई- मेल क्यों नहीं ?बस मैं…	NOT	NONE	hasoc_2020_hi_94
1127507130599104513	@AmitBan18118832 @UdaySin70463196 @RohtasGoel @OmaxeLimited महोदय, मैं जानता हूं कि सीसे लगे हुए थे,लेकिन बहुत पहले लगे हुए थे अगर तोड़ने की बात कर रहे है तो एक जगह तोड़ेगा दो जगह तोड़ेगा और इतनी लापरवाही की आपके यहां सी सी टी.वी कैमरे लगे तोड़ने वाले का पता न लगा पाए जो आपकी कंपनी का नाम खराब कर रहा हो।	NOT	NONE	hasoc_2020_hi_4116
1123491050985803781	RT @Heena78440171: जिस दाल को खाकर . अपना विंग कमांडर "अभिन्दन"पूरे पाकिस्तान को हिला आया उसी दाल को खाकर #तेज़बहादुर यादव को उल्टी दस्…	NOT	NONE	hasoc_2020_hi_3367
1127602450364620800	@ijokani @bishnuprasadtr1 मतलब इसबार EVM बच गयी ?😳😳🙏 हर हार,कोई और ज़िम्मेदार..?”😂😂👎 वाह जी वाह 😆😆😆 @aajtak @ArvindKejriwal https://t.co/GjbzozxHkU	NOT	NONE	hasoc_2020_hi_4150
1127592795080941571	@VijaySmalik @AshokTanwar_INC आज हरियाणे ने बताया की वो कंधे के ऊपर भी पूरे मजबूत है #लट्ठ_दे_मारया_खच्चर_ने #क्लीन_स्वीप #रिवर्स में	NOT	NONE	hasoc_2020_hi_3988
1123569857763479552	@mlkhattar जय श्रीहरि।श्रीहरि के सुदर्शन चक्रसे प्राप्त सूचनानुसार हरियाणा श्री हरिकी भूमि है यहाँ कणाद कपिल गौतम जैसे महाऋषियों के चरण पड़े है भगवान कृष्ण जैसे महायोगी गीता ज्ञान विश्व को देने वाले हुए हैं जैसे हिन्दुस्तान को प्रभु सम्पन राष्ट्र की घोषणा होगी एक से एक बढ़कर विद्यमान होंगें	NOT	NONE	hasoc_2020_hi_237
1127646813517860864	@narendramodi @Gupta_vijender नौजवानों का परवाह आप ने भी नहीं की। दारु के टेखे वाइन शोप 10 बजे बंध हो रहै है। कुछ करो 😉	NOT	NONE	hasoc_2020_hi_2572
1127524364985950208	RT @Rekhta: हम आह भी करते हैं तो हो जाते हैं बदनाम वो क़त्ल भी करते हैं तो चर्चा नहीं होता ~अकबर इलाहाबादी	NOT	NONE	hasoc_2020_hi_144
1127462033450921984	@iKabirBedi हमें अपने लोकतंत्र पर अब प्रहार नहीं दिख रहा।कैसे और कहाँ कहाँ से हमारे मतदान प्रक्रिया को प्रभावित किये जाने का प्रयास किया जा रहा है।	NOT	NONE	hasoc_2020_hi_1385
1127581407541252096	RT @KusumDasi2: #SaturdayMotivation जहां संखों लहर मेहर की उपजै,कहर नहीं जहां कोई। दास गरीब अचल अविनाशी, सुख का सागर सोई।। असली भगति वेद शा…	NOT	NONE	hasoc_2020_hi_1398
1127487450924761089	RT @soniya2250: तबियत ठीक नही रहती अब बिल्कुल भी..~~ जब से तुमने हाल पूछना बन्द किया है..~~ https://t.co/XusHebv7EF	NOT	NONE	hasoc_2020_hi_413
1127671593461616640	RT @Noor_chaudhari: जब भगत सिंह जेल में थे, तब कोई कांग्रेसी मिलने नहीं जाता था। मोदी जी उस टाइम खाना लेके जाया करते थे अंग्रेजों के रडार…	NOT	NONE	hasoc_2020_hi_136
1123543601395294208	घुंघरू सेठ आप मुख्य मंत्री बनने के बाद दिमाग से पैदल हो या जन्म जात हो।	HOF	OFFN	hasoc_2020_hi_3020
1127551871261073408	OPPO F11 Rs 17,990 की कीमत में 15 मई से सेल के लिए होगा उपलब्ध OPPO F11 में OPPO F11 Pro के मुकाबले कुछ फीचर्स कम दिए गए हैं। यही कारण है कि इस रेग्यूलर मॉडल को 15 मई से Rs 17990 की कीमत में सेल के लिए उपलब्ध कराया जाएगा। from Jagran Hindi News - techno… https://t.co/z4xA4U99D6 https://t.co/UpQlk2Sewn	NOT	NONE	hasoc_2020_hi_2508
1127475719469092865	@bhupeshbaghel राहुल गांधी के चमचे हमन वोट दे हन छतीसगड़ ला सुघारे बा और तुम ऐस करो	HOF	OFFN	hasoc_2020_hi_2965
1123650384205996032	RT @mona025011: @KumariKanika1 @rcnsmlk @SomaDalal तुम्हे कौन गैर कह रहा है. लो कर लो बात	NOT	NONE	hasoc_2020_hi_4217
1123508121802952704	जो औरत शादी करने के बाद अपनी अहंकार की वजह से पति को त्याग देती है और गैर आदमी के साथ संबंध रखती है उसको क्या कहा जाता है ? जरा उत्तर दोगी ??	NOT	NONE	hasoc_2020_hi_545
1123551528655118337	@smritiirani चोकीदार भड़वा है ये ये हलाला की क्या है	HOF	PRFN	hasoc_2020_hi_1291
1127548473853730816	RT @rcgarg7: @ArvindKejriwal सड़ जी काठ की हांडी दुबारा नही चढ़ती बहुत हो गया तसल्ली कर लो यू समझो अंधे के हाँथ बटेर लग गए उसको हक न समझो	NOT	NONE	hasoc_2020_hi_2987
1127807115626569728	RT @QuintHindi: एक महिला ने दावा किया है कि @AtishiAAP की छवि खराब करने के लिए कैंपेन चलाने को कहा गया था. कौन है ये महिला? क्या है पूरा मा…	HOF	HATE	hasoc_2020_hi_1877
1127637879650279424	@alok_ajay @RahulGandhi @yadavtejashwi आपके आका मिट्टी में मिल जाएंगे लेकिन बीजेपी से हाथ नही मिलाएँगे, अभी तो उसी में घुस गए क्या करेंगे चमचागिरी और दुकान तो चलानी है	HOF	OFFN	hasoc_2020_hi_3544
1127570271664087043	@sambitswaraj ऐसे लोगों को सबक जनता सिखाने जा रही है 😄😄	NOT	NONE	hasoc_2020_hi_3586
1127754892318203905	RT @singharti411: गिध्दों के कोसने से गायें नही मरा करती https://t.co/VbeLpPKyLN	HOF	OFFN	hasoc_2020_hi_2985
1127540655687782403	RT @GoongaPahalwan: उसके रहते जीवन में कोई गम नहीं होता, दुनिया साथ दे ना दे पर मां का प्यार कभी कम नहीं होता! #Happymother'sday https://t…	NOT	NONE	hasoc_2020_hi_1365
1123625109317660672	RT @immortalsoulIN: मसूद का वैश्विक आंतकवादियों में नाम आ गया पता करो यूएन में चुनाव आ गया क्या - आहत इंदौरी 😫😫 #MasoodAzhar #ModiCrushe…	NOT	NONE	hasoc_2020_hi_980
1127626362083135493	RT @Sanjay52312438: पहले मुझे करेला बिल्कुल पसन्द न था,😪 फ़िर जिंदगी में करेले जैसी एक दोस्त @annupatel77 जी आ गयी औऱ अब🤐 करेला मेरा fvrt…	NOT	NONE	hasoc_2020_hi_2075
1127502722369052672	@itsmevid_u @narendramodi आज का ज्ञान बादल के आने से रडार निष्क्रिय हो जाया करता हैं	NOT	NONE	hasoc_2020_hi_1281
1127582795847483394	#हम_एक_शब्द_हैं_तो वह पूरी भाषा है हम कुंठित हैं #तो_वह_एक_अभिलाषा है बस यही #माँ_की_परिभाषा है.. मेरी आंखों का तारा ही, मुझे आंखें दिखाता है. जिसे हर एक खुशी दे दी, वो हर गम से मिलाता है.जुबा से कुछ कहूं कैसे कहूं किससे कहूं माँ हूं सिखाया बोलना जिसको, वो चुप रहना सिखाता है .. https://t.co/cvBuE523zm	NOT	NONE	hasoc_2020_hi_1428
1127536662701993984	RT @meenakshisharan: ऐसे सर्प मेरे घर के शिव मंदिर के नीचे रहते है, हम उन्हें पूजते है🙏🏼 हाँ, ये अलग बात है की @OmarAbdullah ज़हरीले नाग…	NOT	NONE	hasoc_2020_hi_1766
1123503654869159940	RT @KapilMishra_IND: नहीं @RubikaLiyaquat बहन वीडियो में प्रियंका गाली रुकवा नहीं रहीं, रुकवाने की नौटंकी कर रही हैं भद्दी गाली पर जिस…	NOT	NONE	hasoc_2020_hi_310
1127727155389943808	ममता के चक्कर में आप क्यों अपना संतुलन खो रहे हैं। सुरक्षा बलों की वर्दी में कोई नही आता सिवाय सुरक्षा बल के।	NOT	NONE	hasoc_2020_hi_3417
1123588006496079874	RT @BharatM53816725: इन्होने जो भारत के वोट ना देने वाले आलसी लोगो के आलस्य पे सर्जिकल स्टराइक की हे उसके लिये इन राष्ट्रभक्त को कितने RT…	HOF	OFFN	hasoc_2020_hi_4234
1123653693511831552	RT @sandigirhare2: @msisodia फरजिवाल को लाताडने और जुताडने वाले 7 कौव्वे कहीं उड न जाये इसलिए तूम ये रायता फैला रहे हो	HOF	OFFN	hasoc_2020_hi_3519
1123634424845701120	हथेलियां संभाल लेगी नसीब अपने तेरा हाथ बस...मेरे साथ रहे	NOT	NONE	hasoc_2020_hi_3885
1123648517715554304	RT @preeti_chobey: बहुत ही दुखद खबर, लेकिन देश का चौकीदार चुंनाव प्रचार में व्यस्त है,साहेब ने तो कहा था ,नोटबन्दी से नक्सलवाद की कमर टूट…	HOF	HATE	hasoc_2020_hi_2959
1127466278078353408	नाले से गैस की तकनीक के बाद दूसरा आबिष्कार क्लाउड टेकनिक ।	NOT	NONE	hasoc_2020_hi_2113
1123634626205872129	RT @anuraagmuskaan: मसूद अज़हर को ग्लोबल आतंकी घोषित करवाने का क्रेडिट मोदी को नहीं जाता, ये कहने वाले अगली ही लाइन में ये भी कह रहे हैं की…	NOT	NONE	hasoc_2020_hi_417
1127552416495222785	RT @CaDalmia: इनको तो क्या इनके नाज़ायज़ बाप को ही शर्म नहीं आयी 5 साल कांग्रेस को ही गालियां दे दे के उसी के cbi rbi पुलिस ed ec एयरपोर्ट्…	HOF	PRFN	hasoc_2020_hi_3664
1127483315332608000	RT @khan_boy_13: तो नीचता की सारी हदें पार करते हुए आज चोकीदार ने अलवर #बलात्कार कांड पे भी वोट मांग लिए 😭 शर्म आती है यार हद है मतलब	HOF	HATE	hasoc_2020_hi_373
1123497367590789120	सेना के अधिकारियो को शर्म नही आती।।ये सच्चाई है।।कड़वी है, लेकिन करीब से जाने है।। जनरल वी०के० सिंह जैसे लोग नेता बने तो सही, अगर एक सिपाही नेता बनने आये तो वो देशद्रोही क्योंकि उसने सेना के #खाने के भ्रस्टाचार को उजागर किया।। #वाह रे #दोहराचरित्र https://t.co/DanXA7ZF3R	HOF	OFFN	hasoc_2020_hi_3771
1127620863363301376	RT @ABVPVoice: उड़ीसा राज्य में चक्रवात फेनी से प्रभावित छात्रों की मदद हेतु अभाविप 13-17 मई तक चलाएगा अभियान अभाविप ने देशभर में लोगों के…	NOT	NONE	hasoc_2020_hi_2464
1123625067378663424	RT @MayaParrikh: काली बदली की काली घटा रहीं.. ⛵ नाव किनारे करो,मोजों में मस्ती छा रही ⚓ #रात्रि_🌒🌫 https://t.co/C98YAWFLNF	NOT	NONE	hasoc_2020_hi_2925
1127622587222093824	RT @Bengalan_kudi01: एक घर में I miss you और I love you रहते थे एक दिन Miss you छोङ कर चला गया तो बताओ कौन बचा????😭😭 😢😢😢😢 #No_bad_comment…	NOT	NONE	hasoc_2020_hi_4357
1127527124854689792	लव यू माँ https://t.co/dgzAnhntAR	NOT	NONE	hasoc_2020_hi_2960
1127553486046912512	RT @saitanBacha: @Kanatunga हाथ के कलर से दलित लग रहे हो 😅😅😂😂😂😂	HOF	HATE	hasoc_2020_hi_943
1127494086322057216	फिर भी लोग इन सामंती लोगों को वोट देते है	HOF	OFFN	hasoc_2020_hi_1629
1123642272396931072	मसूद अज़हर को ग्लोबल आतंकी घोषित करवाने का क्रेडिट मोदी को नहीं जाता, ये कहने वाले अगली ही लाइन में ये भी कह रहे हैं की मोदी ने पंद्रह लाख़, रोज़गार, विकास और तमाम मुद्दों से ध्यान भटकाने के लिए मसूद को ग्लोबल आतंकी घोषित करवाया है.😄-अनुराग मुस्कान	NOT	NONE	hasoc_2020_hi_1611
1123510025987604481	इधर की बात उधर करने में आज भी जीमेल से आगे है फीमेल!!!	NOT	NONE	hasoc_2020_hi_4012
1127660893792157697	RT @FunKeyBaat: इस ज़मीन चोर को तिरंगा झंडा की भी पहचान नही, लेकिन दामाद नकली गांधियों की बना बैठा है BC! https://t.co/79whxVVQ2k	HOF	OFFN	hasoc_2020_hi_3190
1127509651367628800	RT @BJP4India: ये मजबूत सरकार है तभी भ्रष्टाचार पर कड़ा प्रहार हो पाया है। हर प्रकार के कानून बनाकर हमने भ्रष्टाचारियों का जीना मुश्किल कर…	NOT	NONE	hasoc_2020_hi_2069
1127593747175206912	RT @KundanTiwary12: देश हित में जरूर वोट करें-- https://t.co/ZWWcjessag	NOT	NONE	hasoc_2020_hi_2658
1127544824796606464	@anuragspparty @yadavakhilesh @ndtv @Mayawati @RahulGandhi टीवी चैनल पर पूरी बहस की माँ बहन करने वाला ये @anuragspparty ही है, बेतुकी बातें, भैं भैं भैं करके उल्टी करते रहता है ये बकलोल	HOF	OFFN	hasoc_2020_hi_4167
1127609035400683521	RT @SohailBobby: भक्तो पिताजी गठबंधन सरकार की वकालत करने लगा🤔"कहाँ तो थेल अतेला तलता है" 😉😉अब क्या हो गया?कहाँ तो प्रचंड बहुमत मिल रहा था…	NOT	NONE	hasoc_2020_hi_1939
1123576342124093440	RT @ShivrajKaBhanja: गुंडे से याद आया, संजय जी, दिल्ली का जो गुंडा 2014 में मोदीजी से हारा था, वो इसबार वाराणसी से क्यों नही लड़ रहा? फट गई…	HOF	HATE	hasoc_2020_hi_1681
1127483457930612738	RT @JagratiGupta3: @sardanarohit अगर अभी ये कार्य BJP शासित राज्य में हुआ होता,तो पूरा विपक्ष और हर मीडिया चैनल इसको प्रमुखता से दिखाता।। प…	HOF	HATE	hasoc_2020_hi_3654
1127809992914898944	RT @cleanganganmcg: उत्तराखंड में पवित्र गंगा नदी के किनारे बसे 'हरिद्वार' का शाब्दिक अर्थ है- 'हरि तक पहुँचने का द्वार'। हरिद्वार को "धर्…	NOT	NONE	hasoc_2020_hi_272
1127497034892623877	@ameesha_patel @KumariKanika1 कहां उड रही हो	HOF	OFFN	hasoc_2020_hi_4061
1127488235272146945	RT @EvmAnti: भाजपा की 10 गाड़ी अभी हरियाणा में ग्रामीणों ने गांव के लोगों को पैसे बांटते पकड़ी है । चुनाव की रात के पहले पैसा बांटो और दिन…	NOT	NONE	hasoc_2020_hi_2577
1123695397472538626	बहुत बुरी खबर .सिद्धू का चाचा..केजरीवाल का मौसा और सुरजेवाल का पापा आतंकवादी घोसीत हो गया @SMQureshiPTI @ImranKhanPTI	HOF	OFFN	hasoc_2020_hi_2468
1127519373760126976	I've just posted a new blog: I've just posted a new blog: बीजेपी के उम्मीदवार मनोज तिवारी और एक और उम्मीदवार भगवान के मंदिर में पूजा करने चले गए और भगवान से प्रार्थना कर रहे हैं भगवान इस बार तो किसी भी तरह से बचा लीजिए ! लेकिन भगवान भी इस बार इन लोगों को… https://t.co/2emrBty72D	NOT	NONE	hasoc_2020_hi_1892
1127602970441539587	RT @Mdhaka5: कांग्रेसी कितने भी हवन करें, भगवा में आतंकवाद के दाग लगाने के पाप से नहीं बच पाएंगे : पीएम मोदी https://t.co/pPfyEa84fR	HOF	HATE	hasoc_2020_hi_1822
1123504921532219392	RT @Rekha25238407: #वेद_मेरा_भेद_है परमात्मा सहशरीर है उस का नाम कबीर है वह धू-लोक के तीसरे पृष्ठ मे विराजमान है हीरे-जवाहरात से जडा परमे…	NOT	NONE	hasoc_2020_hi_4204
1123624144627568640	RT @siya2902: कुछ कुछ उसे सोचने समझने लगी हूं उसकी हकीकत से रूबरू होने लगी हूं ख्यालो में न‌ जाने क्यों मैं उसके खोने लगी हूं धीरे धीरे…	NOT	NONE	hasoc_2020_hi_159
1127552953391300608	RT @MdNadim_BGS: ₹21000Cr की लागत से बनी भारत की पहली परमाणु #पनडुब्बी_अरिहंत किनारे पर ही डूब गई किस महीने में डूबी क्या हुआ कैसे हुआ इसकी…	NOT	NONE	hasoc_2020_hi_3527
1127751234885079040	पता नहीं क्यों मुझे कभी कभी लगता है कि स्वरा भास्कर जी आने वाले भविष्य में 'सीतापुर से टिकट' के फिराक में ये सब चोचले कर रही हैं। https://t.co/RQeP5JO0WJ	NOT	NONE	hasoc_2020_hi_3393
1127812526274539520	RT @rajneeshsail: सोशल मीडिया वह रडार है, जो हवा में फेंके जाने वाले हर झूठ को पकड़ लेता है।	NOT	NONE	hasoc_2020_hi_2484
1127800790616117248	RT @tanisharma77: कोग्रेंसी अपिये बसपा सपा और चममचो 23 मई को जब मोदी जी आयेंगे तो इस तरह तुम लोगों की फट जायेगी😂😂😂 #77onlymodi #AayegaTohMo…	HOF	OFFN	hasoc_2020_hi_1731
1127569936094830592	RT @agrwal_akhil: है ना ये पप्पू की जीजा 😂 😂 😂 😂 😂 😂 जिनको देश का झंडा नहीं पता वो देश की गरीब जनता को न्‍याय दिलाएंगे @priyankagandhi देख…	NOT	NONE	hasoc_2020_hi_2586
1127512566412898304	@iSanjuktaP कोई नही ! इस रात की भी सुबह जल्द ही होगी	NOT	NONE	hasoc_2020_hi_476
1127468459116220417	@HeetaliB सही कहा	NOT	NONE	hasoc_2020_hi_4255
1127545906927214593	RT @sumitsingh4331: ये मंदिर में पूजा के लिए दिए गए रैट है अब समझ नही आता भगवान को पैसा चाहिए या भगवान के नाम पर आप ओर हम लोग को लूटे जा र…	HOF	HATE	hasoc_2020_hi_2782
1127750375061123072	जो नाले से गैस बत्तख से ऑक्सीजन और गोबर से कोहिनूर निकाल सकता है उनके लिए बादल से रडार को झुठलाना कोई अजूबा नहीं है। @RJDforIndia @yadavtejashwi #RadarModi #RadarScientistModi	NOT	NONE	hasoc_2020_hi_1513
1127597152941686784	RT @ChanakyaNiti6: पहले हर अच्छी बात का मजाक बनता है, फिर विरोध होता है और फिर उसे स्वीकार लिया जाता है :- स्वामी विवेकानंद https://t.co/lp…	NOT	NONE	hasoc_2020_hi_2791
1127487593518514176	RT @TejYadav14: खुद को कहता ये चौकीदार है। लेकिन नफरत फैलाना और देश को बाँटना ही इसका असली कारोबार है। https://t.co/lIjLzfVwEE	HOF	OFFN	hasoc_2020_hi_114
1127529909876748293	झूठ मत बोलो देश के किसी आदमी ने तुम्हारी जात नहीं पूछी आपने खुद ही अपनी जात की बात उठाई और विपक्ष के सिर मढ दी बहुत शातिर हो तुम।	NOT	NONE	hasoc_2020_hi_233
1127542706694000640	RT @Avantika_Pandit: #आज_का_ज्ञान😌😌 हर जगह बहस मत करो... . . . . . मारो पीटो, और बात ख़तम करो...😉😉	NOT	NONE	hasoc_2020_hi_874
1127477955016441858	RT @Dil_se_re_: हमारा बॉल गिर गया था खेलते वक़्त सूखे नाले टाइप गड्ढे में मेरे दोस्त ने टहनी पकड़ी और मैं उसका हाथ पकड़कर नीचे बॉल लेने उत…	NOT	NONE	hasoc_2020_hi_2381
1127468895307214848	हर हर	NOT	NONE	hasoc_2020_hi_3222
1127772248364834817	RT @RPDULAR: शायद ये दुनियाँ का अकेला आदमी है जो एक स्याही लगी ऊँगली दिखाने के लिए सारी उँगलियों को खड़ा किए हुए है 😀😃😄😁😆😅😂 https://t.co/RS…	NOT	NONE	hasoc_2020_hi_3832
1127796634048327680	RT @ROFL_INDIAN80: मोदी के दलित कुत्तो को पहचाना मुश्किल नही। भाजपा शासित,UP,गुजरात,MP, RAJ,HAR, मे दलितो की हत्या हो,दलित महिलाओं का बलात्…	HOF	PRFN	hasoc_2020_hi_3729
1127794868237946880	RT @BJP4Himachal: प्रधानमंत्री मोदी जी - जिनसे जनता करती है प्यार और विपक्ष को लगता है डर। https://t.co/DszHNqnyDB	NOT	NONE	hasoc_2020_hi_668
1127800396343177216	लिया जनता को गुमराह करने के लिये। बहुत ही शाजिस करनेवाला और देश को लूटनेवाला और ग़द्दार परिवार है गांधी परिवार। जनता को समझना चाहिये इस परिवार के घिनौने चेहरे को और देश की राजनीति से इसका नामोनिशान मिटाना अति आवश्यक है देश को बचाने के लिये।	HOF	HATE	hasoc_2020_hi_56
1127779785520758785	RT @anoopjournalist: सकल ब्याधिन्ह कर मूला। तिन्ह ते पुनि उपजहिं बहु सूला॥ काम बात कफ लोभ अपारा। क्रोध पित्त नित छाती जारा॥ सब रोगों की ज…	NOT	NONE	hasoc_2020_hi_60
1127468874373451776	RT @Aartisharma23: आएगा तो मोदी ही, नहीं आया तो घसीटकर लाया जाएगा मोदी को राष्ट्रपति के पास। इस्तीफा देने के लिए! 😂	NOT	NONE	hasoc_2020_hi_34
1123492527342899201	ऊ प मे bjp बुरी तरह हार रही है-प्रियंका खान वड्रा । ऊ प्र मे कॉंग्रेस संगठन कमजोर^प्रियंका खान वड्रा सीतापुर मे राहुल खान की रैली मे कुर्सिया खाली हो रही है ।	HOF	OFFN	hasoc_2020_hi_2966
1127613301033029632	RT @Ankit39070392: @ishugupta3011 @DrKumarVishwas वो अरविंद की महानता है यह लोग नही समझते 🙏 कविराज योगेंद्र मयंक यह सब लोग मौका देखते है कब…	NOT	NONE	hasoc_2020_hi_1182
1127625661642752000	RT @NkumarAAP: बुराड़ी विधानसभा में SMS Public School के बूथ पर EVM को शील नहीं किया है बूथ एजेंट को जबरदस्ती साइन करा के बाहर निकाल दिया…	HOF	HATE	hasoc_2020_hi_2930
1123570314942664706	RT @HindiAsiaville: Tejashwi yadav ने कहा, हमारे नीतीश चाचा का चेहरा एकदम उतर गया है, हमें तरस आता है #Election2019 | @NitishKumar | @yada…	NOT	NONE	hasoc_2020_hi_1451
1123601885439520770	RT @nasim_aqib: मज़दूर की मज़दूरी उसका पसीना सूखने से पहले दीजिये। #हज़रतमुहम्मदसल्लाहुअलैहिवसल्लम #मज़दूरदिवस ✍✍@nasim_aqib	NOT	NONE	hasoc_2020_hi_2626
1123742574974513158	RT @Sheela14619778: ऋग्वेद मं.10सुं.90 मंत्र1में विराट रूप काल (ब्रह्म)जिसके हजारों सिर,हाथ, पैर,आँख,कान है।वह पृथ्वी वाले 21 ब्रह्मांडो को…	NOT	NONE	hasoc_2020_hi_2649
1127637095294459905	RT @rohini_sgh: अगर मोदीजी हारे तो राकेश सिन्हा जैसे लोग 6 महिने के अंदर संघ कैसे नाराज था इसके उपर लिखने लगेंगे। फिर राम माधव का आज का ट्…	NOT	NONE	hasoc_2020_hi_859
1123663722084536321	RT @ptshrikant: आज फिर सिद्ध हुआ है #ModiHaiToMumkinHai, जिस दुर्दांत आतंकी #MasoodAzhar को वैश्विक आतंकी घोषित कराने की कोशिशें 10 साल में…	NOT	NONE	hasoc_2020_hi_604
1127806134130286592	RT @ArshadChishti_: मोदी जी शायद अब आप उच्च प्रजाति का झूठे इंसान हो गए हो, दोस्तो देखो ज़रा, सार्वजनिक इंटरनेट का उपयोग 15 अगस्त 1995 को…	HOF	OFFN	hasoc_2020_hi_2285
1127742644954656769	@BantuDas2 #HappyMothersDay2019 माॅ हमारी गलती को तो माफ कर देती है छुपा देती हैं लेकिन कर्म फल भोगने से हमे बचा नही सकती । जाने उस परमात्मा के बारे मे जो हमारे बुरे कर्मों को भी माफ कर देता है । https://t.co/3J0bTFO4Xr	NOT	NONE	hasoc_2020_hi_559
1127585916397088768	RT @DttaShiv: @ZeeNewsHindi अय्याश मुसलमान थे छद्म नेहरू. ऐसे नीच का साथ देकर मोहन दास गाँधी ने देश और हिन्दुओं से गद्दारी की .दोनों क्षमा…	HOF	OFFN	hasoc_2020_hi_459
1127545281992486914	RT @SohailBobby: 2-2 करोड़ की रैली सजाई जाती 50-50 लाख देकर भीड़ बुलाई जाती है लाखों का सूट-बूट पहन कर मोदी आते है 🤔और मंच से बताते है कां…	NOT	NONE	hasoc_2020_hi_411
1127568501646880768	RT @MahilaCongress: कांग्रेस के कार्यकर्ताओं के बिना, मैं कौन हूँ! कोई भी नहीं। कांग्रेस का मैं सिर्फ एक छोटा हिस्सा हूँ। कांग्रेस हर उस व्…	NOT	NONE	hasoc_2020_hi_2362
1123597808601378818	@PankajK17875218 हम लोग भांगडा कर लेंगें... चमचें ताली बजाने के लिए होगें हाय, हाय करके.. 😂 😜 😁	HOF	OFFN	hasoc_2020_hi_1631
1127522091673243648	RT @AtulDass_: #Ramazan 🎋कुरान ज्ञान दाता अल्लाह कह रहा है कि उस कबीर परमात्मा पर विश्वास रखो। वह कभी मरने वाला नहीं है। तारीफ के साथ उसकी…	NOT	NONE	hasoc_2020_hi_3526
1127739822188089344	RT @ippatel: आज PM नें Ramlila Maidan में दिल्ली का ठग जो स्वयं को दिल्ली का मालिक कहता है, उसे फिर निराश किया और उसका नाम नहीं लिया।	HOF	OFFN	hasoc_2020_hi_3804
1127718762600435714	RT @AnjuSha21061554: मै सब्जी खरीदने बजार गया एक मुल्ला सब्जी बेच रहा था मैने पूछा मुल्ली कैसे है साला मुल्ला भड़क गया !😅😂😅😂😅 https://t.…	HOF	PRFN	hasoc_2020_hi_1128
1127811699992453121	@aajtak कमल हासन, यह भी बता दो की राजीव गांधी की हत्या का जिम्मेवार कौन है? DMK या कोई और?	HOF	OFFN	hasoc_2020_hi_3299
1127629230995415040	@PanditKimjong @DdFynDfN9XpDBjK @deepikatomar_ कुछ नहीं हुआ, रोवो मत, सब ठीक है	NOT	NONE	hasoc_2020_hi_63
1127506409166331904	RT @arjunmewada32: गद्दारों की छाती पर चोट किया और एक बार फिर नरेन्द्र मोदी जी को वोट दिया 🙏🙏🙏 एक वोट आतंकवाद को खत्म करने के लिए, एक वोट…	NOT	NONE	hasoc_2020_hi_55
1127478252816044033	@DayalShankar58 @ZeeNewsHindi @Ashutosh10798 यही मै भी सोंच रहा था।	NOT	NONE	hasoc_2020_hi_2072
1127534049654759429	@RaviPratapChand @Sangita32620162 @ShilpiSinghINC तब तो सर इस तरह से नही बोलते	NOT	NONE	hasoc_2020_hi_286
1127553150515384320	RT @nehapatel342634: मेरी नौकरानी और नोकर 😍😍 https://t.co/Df951sNs89	NOT	NONE	hasoc_2020_hi_1333
1127689305990651905	RT @Hindinama2: जितना तुमने उसे प्रेम किया अब उससे उतनी ही नफ़रत कर डालो इसी तरह भूल पाओगी तुम उसे और फिर एक दिन सब शांत हो जायेगा उसके लिए…	NOT	NONE	hasoc_2020_hi_1234
1123602036434411520	@ArvindKejriwal Thodi to sharam kar, Abe tu ek state ka CM hai bhand nahi 🙄	HOF	OFFN	hasoc_2020_hi_1175
1123798501819916292	RT @KulwantDass3: #SundayMotivation #jesus इस पूरी पृथ्वी ही नहीं बल्कि 21 ब्रह्मांड में संत रामपालजी के अलावा खुदा कहो राम कहो अल्लाह क…	NOT	NONE	hasoc_2020_hi_2563
1127781530355417089	@Bhavya_SKS17 @Gyan_p_mishra @_parm_4U @prakash9237 @gautammutha1 @sahajyoti3 @Rajjais65002059 @VishalSatra1 @DigvijaynathTi4 @__kashyap__ @Sanjiv_Sahib हर हर महादेव 🙏 शुभ दिन	NOT	NONE	hasoc_2020_hi_3260
1127801725916594177	🌹फोड़ी-फुंसी हो तो :- 🌹किसी को फोड़ी-फुंसी होते है, तो त्रिफला शाम को फाँक लेंवे सारा फोड़ी-फुंसी सब साफ़ शरीर ठीक हो जायेगा | #SummerHealthTipsByBapuji	NOT	NONE	hasoc_2020_hi_4259
1127472905091076096	@kalikaprasad5 अल्प ज्ञानी को अहंकार सीखने नहीं देता चाणक्य नीति	NOT	NONE	hasoc_2020_hi_2520
1123576639932121088	RT @sir_jenishpatel: @manakgupta कहने वाले कहेंगे ये मोदी की जीत नहीं है चाईना की जीत है....😆😝😝 मसूद अजर को मोदी नहीं चाईना ने आतंकी घोषित…	NOT	NONE	hasoc_2020_hi_957
1123755594102530049	RT @raajsharma1011: किसी और से क्या मोहब्बत 💞 करूं, इन दिनों खुद से ही फिर जुङने की कोशिश कर रहा हूँ।💞💞💞💞💞 https://t.co/g0bIkUBVQ0	NOT	NONE	hasoc_2020_hi_3272
1127795774228590592	इस की सकल देख कर इस को कोई रखेल भी नही बनायेगा।	HOF	OFFN	hasoc_2020_hi_2356
1127567994127769600	यार क्या दिमाग पाया है भक्तो के गुरु ने नाली से गैस बनाते बनाते बादलों मे फाइटर जेट छीपाने का यंत्र भी खोज लिया,अब बस बाकी है भक्तो के दिमाग से गोबर गैस बनाना।	HOF	HATE	hasoc_2020_hi_1322
1123802415113875456	@parvtyagi07 @muftitayyib2 @SharwanLakhani @Mayawati सुना है श्रीलंका मे पिछवाङा उठाना मना कर दिया गया है😂😂😂😂😂😂	HOF	HATE	hasoc_2020_hi_9
1127652672960704514	RT @ArunbajpaiRajan: जब तक देश मे छिपे अंतिम आतंकी को खत्म नहीं कर लेता, इस्तीफा नहीं दूंगा:- मैत्रिपाला सिरिसेना, राष्ट्रपति श्रीलंका मस्…	NOT	NONE	hasoc_2020_hi_20
1123553994884804608	RT @aajtak: #LokSabhaElections2019 तेज बहादुर के नामांकन पत्र के कागजों में गड़बड़ी पाई गई थी https://t.co/w4y7avRlku	NOT	NONE	hasoc_2020_hi_2282
1127619063977394178	चमचों, चुनाव ख़तम होने के पहले बस इतना बता दो कि.... . मणिशंकर कायर की लाश को गाड़ा गया है या जलाया गया है?? 🙄🙄😷😷	HOF	OFFN	hasoc_2020_hi_1907
1127768062441197569	RT @rukasa007: मेजर प्रवीण और सूबेदार पवार का यह बयान सैन्य न्यायालय के रिकार्ड में दर्ज है यही वजह है कि सेना ले.कर्नल पुरोहित को निर्दोष…	NOT	NONE	hasoc_2020_hi_3608
1123773025621618688	@pankhuripathak जब कुछ समझ मे न आये तो @BJP4India के चप्पल मार दो!	HOF	HATE	hasoc_2020_hi_3554
1127774509098885121	@awasthis हर हर महादेव* शिव शंम्भु	NOT	NONE	hasoc_2020_hi_1882
1127563078403481600	RT @mat_jane_de_yar: #CloudStrike अच्छे अच्छे ढल गए इस दुनिया के व्यवहार में ये फेंकु क्या चीज है, पड़ेगी इसको भी लात इस Democracy के बाजा…	HOF	OFFN	hasoc_2020_hi_2591
1127802350880432129	RT @Dr_Anubhav4u: अब ये किसने कर दिया बे😂😂 https://t.co/yV1VxvZq4G	NOT	NONE	hasoc_2020_hi_1092
1123570038085079040	RT @HindiNews18: #HTP। अगर राहुल माफी नहीं मांगते तो क्या होता? क्या वे जेल चले जाते? क्या राहुल गांधी संविधान का मज़ाक उड़ाया है?- @bajpai…	NOT	NONE	hasoc_2020_hi_993
1127814304655265792	RT @BasantA49182115: IMF: - मिस्टर इमरान खान क्या गारंटी है कि आपको दिये गये फंड का उपयोग आप आतंकवाद को बढाने में नही लगाएंगे? इमरान: - स…	NOT	NONE	hasoc_2020_hi_522
1127482006739140609	@RhishiO @ani_digital @ANI बादल से राडार को चकमा देने वाले के भक्त हो काफी है	NOT	NONE	hasoc_2020_hi_4155
1123805216913133574	RT @jyotitiwari05: सबसे ज्यादा हँसी तो उन आदमियों पर आई,जो लेडीज टाॅक के बीच आ गए, आंटी सही हैं,नहीं नहीं लड़कियाँ सही हैं। अवधी में कहावत…	NOT	NONE	hasoc_2020_hi_3912
1127467347646619649	RT @balveer_parmar: रायबरेली UP के सबसे 10 गरीब जिलों में से एक है, और वहाँ की सासंद सोनिया गाँधी दुनिया की 10 अमीर महिलाओं में नंबर 4 पर…	NOT	NONE	hasoc_2020_hi_480
1123764007863713792	RT @manakgupta: चीन को पूरी दुनिया के सामने झुका देना भारत की अब तक की सबसे बड़ी कूटनीतिक जीत में से एक है #MasoodAzhar	NOT	NONE	hasoc_2020_hi_261
1127641725801865216	RT @IamVikas_Kr: डिवाइडर दर्द अभी कम भी नही हुआ था और रडार आ गया!! ~ भक्त कहिन 🤣🤣 @ajitanjum	HOF	OFFN	hasoc_2020_hi_3178
1123749164238635008	RT @Mdhaka5: सुरजेवाला व कपिल सिब्बल ने UN को लेटर लिखकर मांग की है, कि मसूद अजहर को इंटरनेशनल आतंकी घोषित मत करो इससे BJP को फायदा होगा:-…	NOT	NONE	hasoc_2020_hi_3739
1123575159334424577	RT @BJP4India: हाल हीं में श्रीलंका में जो बम धमाके हुए थे उसके बाद वहां की सरकार ने जाकिर नाइक के टीवी चैनल पर बैन लगाने का फैसला किया है।…	NOT	NONE	hasoc_2020_hi_3835
1127564684851200003	RT @AKTKadmin: आंख हैं भरी भरी और तुम मुस्कुराने की बात करते हो, वोट तो डूब गई इनकी भी, वीडियो में भड़ास निकाल सकते हो। https://t.co/w19189…	NOT	NONE	hasoc_2020_hi_2907
1127584469353766912	RT @BebakAawaj: @yadavakhilesh भाजपा को इस समय वोट चाहिए वो भी जनता को जाती-धर्म नेहरू-राजीव गांधी का नाम लेकर... देश की समस्याओं पर अगर…	HOF	HATE	hasoc_2020_hi_1268
1123565319488823296	RT @RahulSinhaZee: टिकिट देने से पहले ये तो पता कर लेते कि सेना में थे या बीएसएफ में, वैसे इन्हें बीएसएफ से बर्खास्त किया गया था https://t.…	NOT	NONE	hasoc_2020_hi_1657
1127587405370839041	@dibang @abpnewshindi @sherryontopp @abpnewstv अब बोला ना जाओ ना दिबांग । दलला अपने पास जमा माल विदेशों में जमा इसका हरामी रहा है	HOF	PRFN	hasoc_2020_hi_1192
1127499777996754944	किसी का दिल तोडना आज तक नही आया मुझे, प्यार करना जो अपनी माँ से सीखा है मैंने।	NOT	NONE	hasoc_2020_hi_3233
1127493935318749185	RT @devduttmyth: श्री राम रावण का वध कर्ते हैं लेकिन उनका अपमान नहीं करते। राजधर्म और राजनीति में फ़र्क़ होता है https://t.co/YdDXeu2Vbx	NOT	NONE	hasoc_2020_hi_3948
1127786622223671298	@dhruv_rathee मोदी जी डिजिटल कैमरे और ई मेल का उपयोग 1987 से कर रहे है भारत मे ई मेल सुविधा विदेश संचार निगम लिमिटेड द्वारा 1995 में शुरू की गई थी मोदी जी ने रास्ते मे एक कविता लिखी थी ,पर जो पेज पढ़ने के लिए मंगवाया वो प्रश्न के साथ प्रिंटेड था मूर्ख हैं तो मोदी है	HOF	OFFN	hasoc_2020_hi_4079
1127568409401520133	@DHARMEN012 @VeerLotus किसी ने नहीं माना है बस गुलामो को छोङ कर	NOT	NONE	hasoc_2020_hi_1593
1123571153799278592	RT @News18UP: अमेठी कस्बे में @priyankagandhi का रोड शो शुरु @INCUttarPradesh https://t.co/oo9ki3AraN	NOT	NONE	hasoc_2020_hi_4191
1127503569630912512	RT @GauriJalpa: पाकिस्तान के, बालाकोट में भारतीय वायुसेना की एयर स्ट्राइक में 130 से 170 आतंकवादी मारे गए थे, इसका खुलासा करने वाली इटली की…	NOT	NONE	hasoc_2020_hi_589
1123786812332421121	RT @SinghAwantika: अभी तक यह इन लोगो ने नही कहा था तो मुझे चिंता होने लगी थी कि AAP चुनाव लड़ भी रही है या नही? अभी चिंता का एक और विषय है…	NOT	NONE	hasoc_2020_hi_3610
1127801004496285696	23 मई को इसका उतरा हुआ मुह देखने लायक होगा जब #NDA प्रचंड बहुमत से जीतेगी !!	NOT	NONE	hasoc_2020_hi_2380
1127463262361128961	RT @priyankagandhi: शहीदों के नाम पर वोट माँगकर उनकी शहादत को अपमानित करने वाले प्रधानमंत्री ने कल अपनी बेलगाम सनक में एक नेक और पाक इंसान…	HOF	OFFN	hasoc_2020_hi_1031
1127613145839697920	@MubashirZaidi apky 100 lafzoo ki khani kaha hai?	NOT	NONE	hasoc_2020_hi_4134
1123823109801426951	@BJP4India @jairamthakurbjp जिस गुड़िया के नाम पे सत्ता में आये आज यही प्रवचन दे रहे हैं ,rape पे राजनीति न करे ।न अपने किसी को ससपेंड किया ।और अब केस को दबाने की कोशिश कर रहे हो ।😂	HOF	OFFN	hasoc_2020_hi_3500
1127676580468183040	Hamaari THORian THORon se kam hai ke?😎✌😂 https://t.co/V4B39UOxqt	NOT	NONE	hasoc_2020_hi_1576
1127790392928350209	इससे ज्यादा मानसिक दिवालियापन क्या हो सकता है?	NOT	NONE	hasoc_2020_hi_2825
1127665985656279040	@art_lover_09 लोग अब यह भी करने लगे शॉपिंग मॉल में ,	NOT	NONE	hasoc_2020_hi_57
1127465137248526336	@sharadknp @narendramodi ये व्यापार बंद हुआ तभी तो इन्का मन डरा हुआ बिती गल्तियों का खुलासा हुआ ऐसे ही गुरू नही कहता " हुआ तो हुआ "	NOT	NONE	hasoc_2020_hi_2350
1127651766969856000	RT @aapkiapni1: जीवन मे किसी के मदद की जरुरत हो तो अवश्य ले शर्माए नही https://t.co/1Bw8tGMonG	NOT	NONE	hasoc_2020_hi_1841
1127758247769903105	RT @SoniyaGupta69: अब अच्छा लग रहा है, प्लीज़ अब रुकना मत और जोर से मुझे चूत में खुजली हो रही है। https://t.co/7ncQQvbMhZ https://t.co/…	NOT	NONE	hasoc_2020_hi_670
1123590409853198338	RT @Narendr67841032: @narendramodi @AbeShinzo @JPN_PMO हाय री किस्मत यह भी अभी होना था-- कांग्रेस यह मोदी तो हमें 40 से 4 पर ला कर छोड़ेगा…	NOT	NONE	hasoc_2020_hi_3102
1127465984493703168	RT @narendramodi_in: जब इन लोगों को मौका मिला तो इन लोगों ने बिजली में भी घोटाला कर दिया। जब मुझे सेवा का अवसर मिला तो ढाई करोड़ से ज्यादा…	NOT	NONE	hasoc_2020_hi_1459
1127513724032446464	RT @Nitu_Ji: पप्पू 2019 में PM बनेगा ... ऐसे विचार उन्ही लोगों के हैं जो सड़क किनारे बैठे हकीम से गुप्त रोगों का इलाज करवाते हैं !😂🙏	HOF	OFFN	hasoc_2020_hi_2942
1127814455637635072	RT @piyushakak4: समझ में नहीं आ रहा कि देश में चुनाव हो ही क्यों रहा है.... सभी संस्थाएं, सारी एजेंसियां तो मोदी जी के पास है ही, वह अपने…	HOF	HATE	hasoc_2020_hi_2721
1127518111303737344	RT @Kavita22666851: "तुम्हें" "ना* देखकर कब तक "सबर"🌸 करू,, आंखें तो बंद कर लू, पर इस दिल का क्या करू.👤🍃 🍃…	NOT	NONE	hasoc_2020_hi_3707
1127619873511600128	@sardanarohit तानाशाही है सब करेगी वंहा	NOT	NONE	hasoc_2020_hi_1958
1127636948485459969	RT @narendramodi: 2019 का चुनाव भारतीय जनता पार्टी नहीं, भारतीय जनता लड़ रही है। https://t.co/U5P0Sy6Ahb	NOT	NONE	hasoc_2020_hi_500
1123593538774585344	RT @kdsingh987: कांग्रेस पार्टी के मसूद अजहर जी #आतंकवादी घोषित हो गए ...👌 कुछ बोलेंगे @RahulGandhi जी अब..?? @TajinderBagga @joshijikabe…	HOF	OFFN	hasoc_2020_hi_2880
1127494245697212417	RT @SinghAwantika: ISIS के आतंकवादियों को हराना है, काफिरों और मूर्ति पूजा करने वालो के हत्यारो के समर्थकों को हराना है। https://t.co/RoP6R…	NOT	NONE	hasoc_2020_hi_1550
1127527586223943680	@yadavdimples Chutiya hai o	HOF	PRFN	hasoc_2020_hi_108
1123565520836415488	@seematri6 @Bhumika__1 हार गये	NOT	NONE	hasoc_2020_hi_2193
1127538302670790656	RT @pbdixit: पत्नी:- मेरे बाल सफेद होते जा रहे है व्हाॅट शुड आय डु?? पति:- व्हाय डोन्ट यु "डाइ"?.	NOT	NONE	hasoc_2020_hi_3140
1123516766225702912	@ArvindKejriwal mein baccho ki kasam khata hoon ki mujhse bada jhootha koi nahin hai ji😂😂😂😂	HOF	OFFN	hasoc_2020_hi_1049
1127570909198336001	RT @Priyank11228390: #fridayThoughts कबीर साहेब कहते हैं चारों वेद कतेब झूठे नहीं है । झूठे वह धर्मगुरु है जो इनको समझ नहीं पा रहे हैं। अग…	NOT	NONE	hasoc_2020_hi_409
1123669111773417472	सूझवान वोटर लुटेरों को सबक़ सिखाएगा हर इक देश प्रेमी कमल का बटन दबाएगा आएगा आएगा फिर मोदी आएगा	NOT	NONE	hasoc_2020_hi_308
1127598599997493248	@dikshas_96 अरे तुम कब आयी ?😱	NOT	NONE	hasoc_2020_hi_1424
1127490680522076160	RT @GauriJalpa: जो व्यापारी, यह बोल रहे हैं कि हम GST के कारण बर्बाद हो गए, वो यह बताएं, कि GST तो आप जनता से लेते हैं, फिर बर्बाद आप कैसे…	NOT	NONE	hasoc_2020_hi_1372
1127762567894634499	Qabool hai.	NOT	NONE	hasoc_2020_hi_110
1127624122341572608	कबीरा तेरे देश में नए-नए विचार बारिश-बादल से फैल हुए रडार	HOF	OFFN	hasoc_2020_hi_1562
1123590330123575296	RT @HTetey: तेजबहादुर यादव BSF का बर्खास्त जवान और टोटिचोर अखिलेश यादव,2017 का यह फोटो है। अब समझ मे आया ये दाल रोटी के वीडियो डालकर,सरकार…	HOF	OFFN	hasoc_2020_hi_469
1127609308026249216	RT @BJP4India: यहां किसानों का 2 लाख तक का कर्ज माफ होना था। किसानों के घर आज पुलिस आ रही है, बैंक किसानों को कर्ज नहीं दे रहे। मध्य प्र…	NOT	NONE	hasoc_2020_hi_4334
1123605387687518214	ड्रैगन झुका, मसूद अज़हर अंतर्राष्ट्रीय आतंकी घोषित हुआ ! संयुक्त राष्ट्र को भी EC का नोटिस तो नहीं भेजा जाएगा ! #MasoodAzhar #UNSC #vinayshukla	NOT	NONE	hasoc_2020_hi_3919
1127626420786814977	RT @JagratiGupta3: जिस तरह से बंगाल में अराजकता फैली हुई है, BJP कार्यकर्ताओं की हत्या कर दी जाती है, TMC के आतंकवादी लोगों को मतदान तक न…	NOT	NONE	hasoc_2020_hi_4288
1127650772936798208	ISIS का दावा, हमने भारत मे प्रांत की स्थापना की #isis #terrorist https://t.co/auKyZQUfHx	NOT	NONE	hasoc_2020_hi_4309
1127492672829018112	RT @Great_Legion: जैसे तड़ीपार , मर्डर कर के सबूत मिटा देता है, वैसे ही @BJP4Gujarat भी अनपढ़ जाहिल की रडार टेक्नोलॉजी वाली डिलीट कर देते…	NOT	NONE	hasoc_2020_hi_971
1127737855080484868	RT @ShivamWays: हालातो के आगे जब साथ न जुबां होती है, पहचान लेती है खामोशी में हर दर्द वो सिर्फ "माँ" होती है 😚😍	NOT	NONE	hasoc_2020_hi_2385
1127517394044219392	RT @Ahmad_Shakeel: जब “ Time “ पत्रिका ने 2014 और 2015 मे मोदी जी की तारीफ़ की थी तो भाजपाई बहुत ख़ुश थे, अब देश को टुकड़े टुकड़े करने वा…	NOT	NONE	hasoc_2020_hi_643
1127598272833511424	RT @ADITIJOSHI01: @KapilMishra_IND बिक गया केजरीवाल दो पट्टी की चप्पल पहन के सब को झूठ बोलता है आत्म मुग्ध बौना👇 https://t.co/EXNpfVcFxu	HOF	OFFN	hasoc_2020_hi_2033
1123577638193434624	@aajtak Modi hai to mumkin hai	NOT	NONE	hasoc_2020_hi_1480
1123805158205480960	RT @RssKanishk: मौलाना मसूद अजहर पर बैन लगवाने से कुछ नही होगा मोदी जी जबतक "हिना रब्बानी" को भारत नही ले आते तबतक हम नही मानेंगे!…	NOT	NONE	hasoc_2020_hi_2660
1123566582003712000	RT @ThePhenomenal_S: खुद की लिखी हुई शायरी डालूँ या कॉपी पेस्ट करूँ या पॉलिटिकल ट्वीट स्टार्ट करूँ 😂 #ThePhenomenal_S	NOT	NONE	hasoc_2020_hi_3396
1127475027383934976	😂😂😂😂 आज केज़रू की ख़ैर नहीं !	HOF	OFFN	hasoc_2020_hi_2117
1123642612160745473	@GdBakshiJe और पप्पू को राफेल के दाम भी नही पता डूब मरो ते चमचो	HOF	OFFN	hasoc_2020_hi_2476
1127522657920937985	RT @chitraaum: अपनी सेल्फी मुझे टैग करते रहें 😃 #VoteKar #VoteDo https://t.co/xdYkMdqV80	NOT	NONE	hasoc_2020_hi_3646
1123669174688079872	@Kavita_Sharma4 लगता है इस आपराधिक प्रवृत्ति के चार बार सज़ा पाए, पाकिस्तानीयों के यार, गद्दारी के लिए BSF से निकाले गए 'फौजी' की मर्दानगी चेक कर चुकी हैं मैडम!!	NOT	NONE	hasoc_2020_hi_3032
1127619705739436033	@KuchBhi03 Graound report hai bhai sare chutiye Gurgaon me baste hai	HOF	PRFN	hasoc_2020_hi_3385
1127804167005691904	RT @INCIndia: दोबारा मत पूछना कि कांग्रेस ने 60 सालों में क्या किया! https://t.co/AAhO4M55wa	NOT	NONE	hasoc_2020_hi_36
1123498919487389696	आखिरकार सच मान ही लिया संसद की लोक लेखा समिति(पीएसी)कमेटी ने कि ऑगनबाडी बहिनें बहुत ही कम (नाम मात्र) 4500/-रू•मानदेय पर कार्य कर रही है।और जब चुनाव आते है तो झूठा आश्वासन देकर हर दल इनके साथ छलावा करता है।अब भी न्याय न मिले तो धिक्कार है केंद्र और राज्य सरकार पर https://t.co/prThdDuNLX	HOF	HATE	hasoc_2020_hi_4233
1127481952200617985	@gilaniwasif @Dr_Uditraj @RabindarPrasad6 भाई गलतफहमी में न रहियो आर एस एस तो यही रहेगी कोइये या हिंदुस्तान में रहके तकलीफ है तो वो अपने बोरी बिस्तर समेट के कहू भी जा सके कोई रोकेगो नाय। राम राम सा	NOT	NONE	hasoc_2020_hi_3003
1127467095988432901	@PollTics @SharmaShradha राह (रास्ते) तो हमेशा से सीधे ही थे, लेकिन हर चौराहे पर ईमानदरो की तफ्तीश क्यूं हो रही? वो चोला पहने ही निकल लिये और ईमानदार को सच्चाई का हेल्मेट भी बचा नही पाया ।	NOT	NONE	hasoc_2020_hi_3760
1123543655938174977	RT @kapoorashok25: @SureshChavhanke @sat1810 अगर कोई लोन वूल्फ़ ट्रक ले कर चढ़ जाए,,,,, फ़्रांस की तरह	NOT	NONE	hasoc_2020_hi_35
1127797963634253824	RT @IAm_Sanjaysri: यह वीडियो हरियाणा का फरीदाबाद का होने का दावा किया जा रहा है | यह वीडियो भारत का #LokSabhaElections2019 का है ? दुख‌ इस…	NOT	NONE	hasoc_2020_hi_1105
1127812819879989248	RT @ashok__pareek: अच्छा सुनो📣 जब तक पप्पू प्रधानमंत्री नही बन जाता म तुम्हें युहीं परेशान करता रहूंगा 😹😹😂😂 ठीक है😈	HOF	OFFN	hasoc_2020_hi_1972
1127758595922120704	हरियाणा में चुनाव निर्विघ्न सम्पन्न! प्रदेश की #जनता व #चुनाव आयोग को साधुवाद	NOT	NONE	hasoc_2020_hi_1930
1127772818802741248	@TajinderBagga एक दम से देखता हूँ तो ऐसा लगता है,,ममता डायन मांग रही है।	HOF	OFFN	hasoc_2020_hi_505
1127562755467145216	Halo hai hai halo	NOT	NONE	hasoc_2020_hi_4291
1123609695250313216	RT @Kavita_Sharma4: चुनाव आयोग ने भाजपा मे शामिल होने का इन्कार किया फिलहाल बाहर से ही समर्थन जारी रहेगा देशहित मे 😅😆😉 https://t.co/0EzZ…	NOT	NONE	hasoc_2020_hi_1798
1127752136693915648	@ReallySwara @digvijaya_28 @INCIndia @RahulGandhi लगता है इस बार अमृता का पत्ता कट और स्वडा बनेंगी मिसेज दिग्विजय...	NOT	NONE	hasoc_2020_hi_1332
1123577067767943168	अब होगा न्याय	NOT	NONE	hasoc_2020_hi_3380
1127614991329157121	@arshiazizkhan @yadavakhilesh भांड है नौटंकी ही करेगा।।।।।	HOF	PRFN	hasoc_2020_hi_1530
1127754837821509632	RT @shakilpatel86: इलाहाबाद कमलानेहरू अस्पतालमें ट्यूमरसे जूझरही एकबच्ची निजी विमान छहसीटर होनेके वजहसे बच्चीऔर उसके मातापिताके साथ मोहम्मद…	NOT	NONE	hasoc_2020_hi_3798
1127464503895941120	#लोकतंत्र का #चौथा_स्तंभ अब #मीडिया नही,, #सोशल_मीडिया है,, इसे #संशोधित किया जाए,,!!! 🤓 आप जैसे #journalist से डर भी लगता हैं	NOT	NONE	hasoc_2020_hi_746
1127600030259372032	RT @RomaPrashant603: @udaymeena13 माँ को प्यार दें सम्मान दें आदर दें जिस माँ ने ऊँगली पकड़ चलना सिखाया बुढ़ापे में उस माँ की लाठी बनें कह…	NOT	NONE	hasoc_2020_hi_1747
1127800115316453378	RT @TrishaRajput20: मुझको हर हाल में बख़्शेगा उजाला अपना चाँद रिश्ते में तो लगता नहीं मामा अपना, मैंने रोते हुएपोंछे थे किसी दिन आँसू मुद्द…	NOT	NONE	hasoc_2020_hi_3479
1127570082907865088	दिग्विजयसिंह जी ने अपना मत न डालकर भारतीय लोकतन्त्र के प्रति घोर लापरवाही की। ऐस लापरवाह नेता को भोपाल से हारने से कोई नहीं रोक सकता।	NOT	NONE	hasoc_2020_hi_3989
1127611757533417472	RT @Jitendr27440411: जब प्रियंका अमेठी में बोल रही थी कि मोदी झूठ बोलता है उस वक़्त राहुल गांधी कोर्ट में झूठ बोलने पर माफीनामा दे रहा था…	NOT	NONE	hasoc_2020_hi_3379
1127629784626843648	@LastQamar @NavbharatTimes आज भी कश्मीर में सो सुअर मार दिए हम लोगो ने	NOT	NONE	hasoc_2020_hi_2318
1123654997911015424	कहां भाग गया लालू का लाल। बहुत गुंडागर्दी फैलाई है लालू ने और आज उसका असर समाज को झेलना पड़ रहा है।	HOF	HATE	hasoc_2020_hi_1303
1127598151198814210	RT @SanjayJ07609621: गजब हो गया अब इतने ही स्पीडवा से जायेगा तो फेकेंद्र मोती( लाल पराठा) ही https://t.co/od97vqCFX3	NOT	NONE	hasoc_2020_hi_3560
1123541005146279936	RT @Vivekoberoii: अगर ये रेड 2 हफ्ते पहले पड़ी होती तो कांग्रेस अपने मेनिफेस्टो मे Income tax department खत्म करने का वादा भी कर देती । #धू…	NOT	NONE	hasoc_2020_hi_3562
1127622037764177925	ये वो लोग हैं जो भीक नहीं मागते,ऐसा लोग नजर आये तो कुछ खरीद लीजिये । इनकों सिर्फ दो वक्त की रोटी की ज़रूरत है कोई बहुत बड़ा आदमी नहीं बनना है।। https://t.co/jLF2gVUQN3	NOT	NONE	hasoc_2020_hi_1456
1123503671637970949	RT @Diva_Rizvi: @J_Indian3 @Twitter @TwitterIndia @TwitterIndia बेचारा इतना मजबूर और कमजोर है कि मां बहन की गाली बकने वालों की भी रिपोर्ट क…	NOT	NONE	hasoc_2020_hi_269
1127569441166897152	RT @BJPLive: ये कितने भी हवन करा दें, ये कितने भी जनेऊ दिखा दें, पुलिस को भगवा ड्रेस भी सिलवा दें, लेकिन भगवा में जो आतंक के दाग लगाने की इ…	HOF	HATE	hasoc_2020_hi_2972
1127615284909563904	इने पढ़ना लिखना थोड़ी ही आता है 😂😂😂	NOT	NONE	hasoc_2020_hi_2590
1127769417192857602	RT @The_naaz: यह हैं मोहम्मद कैफ़ ~ जो कि हाफ़िज़ हैं और बी टेक कम्प्यूटर साइंस कर रहे हैं। कमाल यह है कि वो मवाना की एक मस्जिद मे तरावीह…	NOT	NONE	hasoc_2020_hi_921
1127805156857221120	RT @Bsharma7: ये है दिल्ली के बलविंदर सिंह अंकल, 84 नरसंहार में इन्होंने अपना सबकुछ खो दिया, इनकी सारी संपत्ति जल गई थी और वह सड़क पर आ गए,…	NOT	NONE	hasoc_2020_hi_1635
1127599464015958017	RT @eralam1992: @MLArajeshSP मोदी - पाकिस्तान पर हमला करने जा रहे हैं, सिपाही - सर ये तो खराब है मोदी - अरे इसीलिए तो काला पेंट कराया है कि…	NOT	NONE	hasoc_2020_hi_671
1127640803063394304	RT @DaasJai: #WednesdayWisdom श्री कृष्ण के मरने के बाद में गोपियों को भीलों ने लूटा और अर्जुन को भी पीटा फिर भी लोग कृष्ण को ही भगवान मान…	HOF	HATE	hasoc_2020_hi_4005
1123811630029123586	ऊँ श्री हरि विष्णु	NOT	NONE	hasoc_2020_hi_1973
1127479058122493953	लो जी मिल गया हिन्दू आतंकवादी 👇👇 https://t.co/gCeC5jjisI	HOF	HATE	hasoc_2020_hi_2418
1127779307386953728	RT @sadashiv_sharan: बच्चा रोया तो माँ बोली सोजा नही तो गब्बर आ जायेगा... बच्चा :- नही माँ "आयेगा तो मोदी ही"	NOT	NONE	hasoc_2020_hi_785
1127709832931360770	RT @nidhidynamic: चार चार उंगलियो से vote डालने वाला एक मात्र आदमी🤣🤣🤣 https://t.co/gmh0dpw6t5	NOT	NONE	hasoc_2020_hi_3643
1127497726965440512	RT @drushayadav: आज गजब का उत्साह देखा वोटरों में मोदीजी के प्रति.. हर 10 में से 8 व्यक्ति सुई धागा लेकर आया था साहेब का झोला तैयार करने…	NOT	NONE	hasoc_2020_hi_2712
1127532711680208896	RT @pargyadidi: लाहौर,मस्जिद में फटा बम कम से कम 40 मरे। "बमजान मुबारक"	HOF	HATE	hasoc_2020_hi_2305
1127795455457316864	RT @seematri6: जो भी #कांग्रेसी प्रत्याशी यह मान रहा हो कि वह हार रहा है . . . तब #प्रियंका को बुलवाले सिर्फ हारने से काम नही चलेगा, जमान…	HOF	OFFN	hasoc_2020_hi_1087
1123662929360867333	@MANOJGU45978585 Shameless hai Sabhi..	HOF	OFFN	hasoc_2020_hi_25
1127508258862714881	RT @Sunnydeolsir: एक काँग्रेसी चमचा आज कह रहा था :- वो भी क्या दिन थे जब 4 लोग साथ मे लौटा लेकर जाते और साथ बैठकर हगते हुए सुख दुख की बाते…	HOF	PRFN	hasoc_2020_hi_2992
1123787718264336386	RT @ashutosh83B: क्या तेज बहादुर का पर्चा किसी दबाव में कैंसिल करवाया गया?क्या चुनाव आयोग कठपुतली बन गया? ⁦@BJP4India⁩ ⁦@yadavakhilesh⁩ ⁦@…	NOT	NONE	hasoc_2020_hi_1404
1127528831923785728	मणिशंकर की जगह सैम पित्रोदा ने पूरी कर दी . . सेल्फगोल . . .	NOT	NONE	hasoc_2020_hi_1286
1127537228945735680	RT @harshcha: म्हारे हरियाणा के भाईयों बहनों जे संसार राखणीं है भारत की चौधर बराकर तो 10/10 में लाओ चौकीदार। #MeraVoteModiKo	NOT	NONE	hasoc_2020_hi_2589
1127594170799943680	RT @pawanpandeysp: आठ दिन की राजनीति का पैदाइस 'निरहुआ' अपने आप को त्रिलोक का सबसे बड़ा प्रतापी बता रहा है, निरहुआ कह रहा है कि वह भगवान का…	HOF	PRFN	hasoc_2020_hi_41
1127560805098987520	RT @KhannaPal: Time Time ki baat hai ! @jaavedjaaferi सिर्फ पांच साल में मोदी जी कहां👍 से कहां👎 पहुंच गए। सब कर्मो का फल है। https://t.c…	NOT	NONE	hasoc_2020_hi_1500
1127762031036157953	RT @MohammadSherAl6: प्लेन को बादल में छुपवा दिया??ये आदमी पीएम होकर कैसे इतना झूठ, ऑन कैमरा बेशर्मी से बोलता है? भाई हिम्मत और बेशर्मी की…	HOF	OFFN	hasoc_2020_hi_2215
1127544950650998788	RT @ashu3page: Karma! जिस गली में आग लगते घरों को देखकर मौज लेते थे,भूल गए कि उसी गली में मेरा घर भी है. https://t.co/MBjPLqMGLa	NOT	NONE	hasoc_2020_hi_1648
1127496305087934464	RT @JBMIS: कांग्रेस ने देश को आजादी दिलाई:- नवजोत सिंह सिद्धू गद्दार तू 1984 भूल गया क्या??	HOF	PRFN	hasoc_2020_hi_3281
1127520996955549696	RT @HindiJKR: शीला दीक्षित ने दिल्ली के सीएम से कहा, ‘क्यों गलत अफवाह फैला रहे हो, कोई काम नहीं हो तो खाने पर आएं’, केजरीवाल ने दिया यह जवा…	HOF	OFFN	hasoc_2020_hi_3444
1123567823509344257	RT @BJPLive: कांग्रेस ने मध्य प्रदेश के किसानों से ये कह कर वोट लिया था कि 10 दिन में 2 लाख रुपये तक का कर्ज माफ़ कर देंगे। वो 10 दिन कब…	NOT	NONE	hasoc_2020_hi_681
1127789625383067648	हालत ये है कि आदमी रात मे लघुशंका के लिए भी उठ रहा है, तो कांग्रेस के खिलाफ तीन चार पोस्ट डालकर ही सोता है 😜🤣😂 @ShilpiSinghINC	HOF	HATE	hasoc_2020_hi_903
1127707970647875584	SHUTTYUUPPPP this is cute	NOT	NONE	hasoc_2020_hi_4296
1127556765992640513	RT @SaffronJay: बहुत तगड़ा माल फुकता है बाबा! इस घोचु की हरकतें देखके नेताजी भी सोचता होगा,BC गुप्त दान कौन दे गया होगा? दरसल टीपू @yadava…	HOF	OFFN	hasoc_2020_hi_554
1123619065317216256	काग-रेस का तुरुप का पत्ता मसूद अजहर तो गया	NOT	NONE	hasoc_2020_hi_2121
1123481928366211073	RT @BJP4CGState: मैंने हर गरीब के दर्द को समझा है, उसके दर्द को सुना है, उसकी बीमारी को समझा और उसकी जिंदगी को जाना है, इसलिए आयुष्मान भारत…	NOT	NONE	hasoc_2020_hi_3234
1127579482338906113	RT @JagratiGupta3: हमारे देश में हर दिन माँ का ही होता है। हिंदुस्तान में हर इंसान के पास कम से कम 3माँ होती हैं। जन्म देने वाली-माँ जहां ह…	NOT	NONE	hasoc_2020_hi_1093
1127631244261449728	RT @pankhuripathak: भाई इंडिगो वाले १० बार नाम ले कर “लास्ट कॉल लास्ट कॉल” चिल्लाए हैं और ख़ुदहै फ़्लाइट २० मिनट लेट कर दिए हैं ! मतलब पू…	NOT	NONE	hasoc_2020_hi_2395
1123496449033981953	@sherryontopp जब कांग्रेस की सरकार थी, तब 80 रुपए पेट्रोल थी, तो यही चीज कांग्रेस पे लागु नही होगा?	NOT	NONE	hasoc_2020_hi_1082
1123474965829959680	RT @SureshChavhanke: मेरी बात पर अमेरिका की मुहर। #श्रीलंका में हुए बम धमाके और जप्त किया हुआ गोला बारूद #SriLank को दहलाने के लिए लाये गए…	NOT	NONE	hasoc_2020_hi_3663
1127780272068415490	#वोट_जरूर_करें 👉 क्योंकि 1776 में अमेरिका में 1 वोट ज्यादा मिलने से जर्मन भाषा के स्थान पर अंग्रेज़ी भाषा बनी, 1875 में फ्रांस में मात्र 1 वोट से राजतंत्र के स्थान पर जनतंत्र आया, 1923 में 1 वोट ज्यादा मिलने से हिटलर नाजी़ पार्टी का प्रमुख बना और तानाशाही युग की शुरुआत हुई...!	NOT	NONE	hasoc_2020_hi_530
1127654304553136128	RT @ashok_kumarjain: अच्छी बात है तो अब कोर्ट को इसको बेज्जत बरी करे बीना टोच्चर https://t.co/1ruThHmqms	NOT	NONE	hasoc_2020_hi_1566
1127648499607031808	@aajtak मा कसम कोई इसको 5 एकड़ का प्लॉट दिखादो, और बोलो ये भारत का झंडा है, ये उसकी फोटो लगा देगा, वैसे इसके मा बाप तो स्कॉटिश है ना....	NOT	NONE	hasoc_2020_hi_1196
1127543944005464064	RT @atulbegwani5454: कमेन्ट मे जय श्री राम लिखते ही सिद्धू को चप्पल लगेगी खुद ट्राई करे मै ने भी किया फिर शेयर कर रहा हूँ ॥ . @sherryontop…	HOF	OFFN	hasoc_2020_hi_955
1127523219970248705	@narendramodi जो खुद के लिए नही गरीबो के लिए जीत है उसी को लोग चौकिदार कहते है और येसा केवल मोदी जी कर सकते दूसरा कोई नही नमो नमो🙏🙏🚩🔥🇮🇳 🇮🇳	NOT	NONE	hasoc_2020_hi_1552
1127572213597638656	@TechnicalSutta @DrKumarVishwas https://t.co/UyxfvJUllR ये देखो मोदी जी ने मेहुल चौकसी को "भाई" कहा. अब बताओ क्या ख्याल है?	HOF	OFFN	hasoc_2020_hi_2952
1127779504506585089	RT @JatG007: क्या खेल खेल रही है ममता😑 ये लोकतंत्र हैं इसे हिटलर तंत्र बनाया हुआ है😑 वोट के लिए कहा तक गिर सकती हैं ममता वीडियो में देखे सक…	HOF	OFFN	hasoc_2020_hi_3005
1127603171784675329	@SanjayAzadSln @ArvindKejriwal @AtishiAAP आप वाले अब सच्चे आरोप भी लगाएंगे तो जनता झूठ समझेगी किउंकि आपियों ने झूठ बोल बोल के अपनी इमेज ही ऐसी बना ली है इसे कहते हैं अपने हाथ से अपनी कब्र खोदना ......भेड़िया आया ....भेड़िया आया वाली कहानी तो याद होगी ?	HOF	HATE	hasoc_2020_hi_1336
1127688228058816512	RT @Babluku54396430: सुनती हो, कब आओगी? तुम्हारे हिस्से का खून मच्छर पी रहे हैं😐 https://t.co/Ub83cmTi5k	HOF	OFFN	hasoc_2020_hi_1572
1123537569994629121	RT @yadavtejashwi: खाली मेरे चाचा पर विशेष नज़र बनाए रखिए। प्यारे @NitishKumar चाचा,आपने अपना क्या हाल बना लिया है। शायद अब घुटन नहीं होगी…	NOT	NONE	hasoc_2020_hi_1252
1123595640141803520	RT @BJP4India: कांग्रेस के एक बयान बहादुर, मुंहफट ने कहा कि मोदी को ऐसा छक्का मारो कि सीमा पार मरे। कांग्रेस वालों को आपके मोदी से इतनी नफ…	HOF	HATE	hasoc_2020_hi_506
1127548008290111488	RT @Pandey__Pramod: बड़ी खबर:- संयुक्त राष्ट्र ने मसूद अजहर को वैश्विक आतंकी घोषित किया। अब बोलो चमचों 🤒 #मोदी_है_तो_मुमकिन_है ✌️ #DeshBol…	HOF	PRFN	hasoc_2020_hi_1583
1127462448666169345	RT @BJP4UP: कांग्रेस सरकार की नीयत सही होती तो वो अलवर में जो हुआ, उसे छिपाने में, दबाने में नहीं लगती। लेकिन नहीं, इनके पास तो एक ही जवाब…	HOF	HATE	hasoc_2020_hi_2924
1123821725702066176	RT @yadavteju: एक जवान के आगे 56 इंच से सिकुड़ के कितना रह गए?? कोई बता सकता है क्या??	NOT	NONE	hasoc_2020_hi_3806
1123627181316263937	@ZeeNewsHindi इससे ज्यादा नहीं मिलेगा बाबा😂🤣😂🤣😂	NOT	NONE	hasoc_2020_hi_2269
1123484847576616960	RT @Heena78440171: @aajtak #तेज़बहादुर #मोदी जी के खिलाफ ही क्यू लड़ रहा है . कन्हैया के खिलाफ़ क्यू नही . #कन्हैया कुमार ने तो फ़ोजियो…	NOT	NONE	hasoc_2020_hi_963
1127550029923635201	RT @RakeshS90711255: #माँ का दिन नही होता #माँ से ही दिन होता है❤ सब पोस्ट कर रहे है लव यू माँ वास्तव मे सच्चाई क्या है? घर के चाहे माँ…	NOT	NONE	hasoc_2020_hi_141
1127714912212475905	@banojyotsna तुमने दी आवाज , लो मै आ गया बादलों को छुपा कर मै अा गया रडार को भी बादलों में छुपा कर अा गया तुम्हारा फेकू रडार के साथ अा गया तुमने दी आवाज , लो मै आ गया	NOT	NONE	hasoc_2020_hi_3021
1123558747048013825	RT @imHarshThakur_: इसको पप्पू नहीं तो क्या बोलेंगे https://t.co/fFF7BUDIcI	NOT	NONE	hasoc_2020_hi_3540
1127586340046946307	RT @kuruwila: आज एक चू*या कांग्रेसी और आपीये चमचे से बात हुई। बोले जब गीदड़ की मौत आती है तो वो शहर की तरफ भागता है। हम बोल कौन चू*या था वो…	HOF	PRFN	hasoc_2020_hi_1442
1123595308766597122	RT @Chatterj1Asking: कांग्रेस के “मसुद अज़हर जी “ तो गयो 10 जनपथ मे शोक की लहर हाथी घायल और साईकल पंचर होने की ख़बर साथ साथ आ रही EVM छो…	NOT	NONE	hasoc_2020_hi_473
1127807618943074304	@adhikari_ruma सुप्रभात मेरी प्यारी बहन जी 💐🙏हर हर महादेव 🚩🙏	NOT	NONE	hasoc_2020_hi_3522
1127801268762583040	@akashbanerjee @ECISVEEP क्योंकि अब ये टी एन शेषन वाला चुनाव आयोग नही जिसके समय राजनीतिक पार्टियां धींगा मुश्ती करने की सोच भी नही सकतीं थी। अब तो चुनाव आयोग के संज्ञान में लाने वाले को साबित करने की भी जिम्मेदारी नही तो जेल।	NOT	NONE	hasoc_2020_hi_3628
1123611268118503424	सब मिलकर प्रेम से बोलो :- नाईस पिक्चर https://t.co/NUqkPPhcbx	NOT	NONE	hasoc_2020_hi_3405
1123493580121825280	RT @INCBundelkhand: नहीं झुके ये शीश तुम्हारा ये वादा हमारा है , खुद्दारी का सम्मान हो , हर संकट में साथ हमारा है । #NyayForMazdoor htt…	NOT	NONE	hasoc_2020_hi_2734
1127583278205038593	RT @Jekki_KHaN_786: दिल्ली के चुनाव आये तो 1984 दंगो में सिखों का कत्लेआम याद दिलवा दिया, लेकिन 2002 गुजरात दंगों में मुस्लिमों का कत्ले…	HOF	HATE	hasoc_2020_hi_2163
1127807878985699328	@sherryontopp आप खुद टरर् टर्र कर अपने को देशद्रोही साबित कर रहें हैं	HOF	OFFN	hasoc_2020_hi_2728
1127570867251113985	कांग्रेस MC नेर चौक में करेगी सर्जिकल स्ट्राइक- BJP चेयरमैन &amp; वाईस चैयरमैन की होगी छुट्टी। कांग्रेस लायेगी अविश्वास प्रस्ताव- Advance News Himachal Buero https://t.co/OxqNPqfBkR	NOT	NONE	hasoc_2020_hi_916
1123559237777379330	RT @aajtak: गुजरात कांग्रेस के नेता शंकर सिंह वाघेला ने बड़ा बयान दिया है #LokSabhaElections2019 https://t.co/4HmKIUMTqP	NOT	NONE	hasoc_2020_hi_3455
1127786840352641024	RT @rukasa007: महाराष्ट्र राज्य मानवाधिकार आयोग, को भेजी गई शिकायत यह शिकायत कैप्टन नितिन दात्रे जोशी ने की थी ले.कर्नल पुरोहित प्रसाद श्…	NOT	NONE	hasoc_2020_hi_2653
1127648055031947265	पप्पू लाल इस लिए हाथ दिखा रहा है वह जानता है फिर एक बार हाथ से सता गई	HOF	OFFN	hasoc_2020_hi_3482
1127814958941523968	RT @RSFBLB: मैं मतदान करके कमरे से जेसे ही बाहर निकला लाइन में खड़े मेरे मित्र ने पूछा... वोट डाल दिया ? मैने कहा:- हां.. मैंने अपना वोट…	NOT	NONE	hasoc_2020_hi_4063
1127597543037128709	@republic पप्पू का जीजा पगलेट	HOF	OFFN	hasoc_2020_hi_204
1127655432795779072	@RoyalThakurain हा मुझे पता है😂😂	NOT	NONE	hasoc_2020_hi_4397
1127746260440453120	@girirajsinghbjp यहाँ सहिष्णु,अहिंसक,सर्व धर्म समभाव हिंदू हैं...हमारी विनम्रता को कमजोरी समझा गया| और कुछ स्वार्थी राजनीतिज्ञ जिस थाली में खाते हैं उसी में छेद कर रहे हैं....जितनी उदारता यहाँ है विश्व में और कहीं नहीं मिलेगी |	HOF	HATE	hasoc_2020_hi_2826
1123574878345371648	@aajtak मोदी भक्त आज इतने खुश हैं,जैसे इनकी अम्मा के लोंडा हुआ हो.🤣🤣🤣🤣	HOF	OFFN	hasoc_2020_hi_1901
1123611616254160896	3/120 is most. Yeh maths sirf sindh k schools main he ho sakta hai. 😁	NOT	NONE	hasoc_2020_hi_1632
1127593801705566209	Me khoobsurati me kisi se pichey nhi hun Mery sath masail sirf zuban k hain 😉	NOT	NONE	hasoc_2020_hi_3075
1127501766075924481	@UP_Silk @sdPachauri1 @narendramodi @Ratnadeepsharm4 @Deepika81682230 @01_djbhatt @0309swati @12shrikar @15705f3fcdbc4d7 @143shivamkumar @15abhilash यस वोट करों	NOT	NONE	hasoc_2020_hi_2919
1123762745378246660	RT @NuhCongress_SC: हरियाणा के गुरूग्राम लोकसभा क्षेत्र में चार मई को गरजेंगे राहुल_गाँधी : @CaptAjayYadav #LokSabhaElections #Vote4Congre…	NOT	NONE	hasoc_2020_hi_3121
1127538197808984066	RT @BJP4India: इनको अगर जरा भी मौका मिला तो ये देश की रक्षा -सुरक्षा को खतरे में डाल देंगे और देश सुरक्षित नहीं होगा तो विकसित नहीं होगा:…	NOT	NONE	hasoc_2020_hi_4138
1127613292623458304	@laluprasadrjd हा तो एक बात बताओ 5 साल के अंदर न कोई दंगा हुआ नही कोई देश के अंदर कोई बम विस्फोट हुआ भाई लोग असलियत यही की यही लोग जातिवाद के नाम पर जहर उगलेंगे और जितने भी मुसलमान भाई है 2004 और 2004 के बाद में बिहार में अंतर देख तब किसी को सपोर्ट करो ये सब सिर्फ आपलोगो को वोट बैंक समझते है	NOT	NONE	hasoc_2020_hi_1034
1127504089749671936	RT @mithleshkumarmi: शरीर से प्रेम है तो व्यायाम करें, आत्मा से प्रेम है तो ध्यान करें, देश से प्रेम है तो मतदान अवश्य करें। 🙏…	NOT	NONE	hasoc_2020_hi_1999
1123609825256939523	RT @narendramodi_in: यहां राजस्थान में कांग्रेस की सरकार बनी। अब यहां पर किस तरह के सवाल उठ रहे हैं- 10 दिन हो गए, 100 दिन हो गए, कर्जमा…	NOT	NONE	hasoc_2020_hi_2615
1123820383541575681	RT @satishchoubey7: UN द्वारा मसूद अजहर को ग्लोबल आतंकी घोषित करने के खिलाफ कांंग्रेस जा सकती है निर्वाचन आयोग, ये आचार संहिता के उल्लंघन…	NOT	NONE	hasoc_2020_hi_3865
1127639750318231552	आदरणीय बाबा जी,चरण स्पर्श, हमारे कॉलोनी रुस्तमपुर की सड़क बनवाने की कृपा करें। विगत 10 वर्षों से गड्ढा युक्त है यह रोड। कृपया गड्ढा युक्त सड़क से नागरिकों को मुक्ति दिलाएं।🙏🙏🙏🙏🙏	NOT	NONE	hasoc_2020_hi_875
1127602697811574784	@maanshart @bjp_ka1_virodhi @manakgupta Sare (tumlog bi) brastachari jailme	HOF	PRFN	hasoc_2020_hi_2749
1127507076081545216	RT @ReallySwara: पूर्वी दिल्ली आज दिल्ली की बेटी आतिशी को अपना एक एक वोट देकर विजयी बनाएँ! यह काम की राजनीति करेंगी नाम की नहीं! Good luck…	NOT	NONE	hasoc_2020_hi_1737
1127475593618935808	ना आमिर औन ना सलमान-शाहरुख, करीना कपूर को ने बताया इस अभिनेता को सबसे बड़ा खान https://t.co/6mEZHEu0ia	NOT	NONE	hasoc_2020_hi_2062
1123642519869218816	RT @CallGirlSonam: 💝💦तुम्हे ना देख कर कब तक🤔 सब्र करूँ.,. 😓 आँखे तो बँद 🙈कर लूँ ,पर इस दिल ❤का क्या करूँ..!! 😍🤔 https://t.co/kO0GzbnZ…	NOT	NONE	hasoc_2020_hi_3634
1127650642917347328	RT @shuklapinku: थमते थमते थमेंगे आँसू , रोना है , कोई हंसी नहीं हैं!!!	NOT	NONE	hasoc_2020_hi_2831
1127526118209114117	@RabriDeviRJD चारा चोरनी का शाप भी लगता है क्या? https://t.co/88I6xSWRDO	NOT	NONE	hasoc_2020_hi_1473
1127814006863843328	Sant Shri Asaram Bapu Ji बताते हैं गर्मियों में अपने स्वास्थ्य की रक्षा करने हेतु क्या करें -यदि गर्मियों में सिर में दर्द बना रहता है तो मुल्तानी मिट्टी से स्नान करें फायदा होगा #SummerHealthTipsByBapuji	NOT	NONE	hasoc_2020_hi_217
1127795426105511936	RT @anuragtamrakar6: पहले बीबी बनाया। फिर अम्मी बनाया, फिर अम्मी को बीबी बनाया। फिर बीबी को भाभी बनाया, फिर भाभी को बीबी बनाया बहोत कन्फ…	NOT	NONE	hasoc_2020_hi_2360
1127655797725360128	@BBCHindi बस करो गावस्कर 😆😆 अब वेंगसरकर को भी खेलने दो । गजब हो यार बीबीसी तुम भी टोटल बीसी हो गए हो क्या 😜😜 अब इसमें भी मोदी खोज ही लिए 😁😁 अब और कंहा कंहा और मोदी जी का दोष और हाथ पांव बताओगे बाबा जी लोग 🙄🙄	HOF	PRFN	hasoc_2020_hi_2955
1127483407607271424	@AshrafFem बेगुनाह कन्हैया पर राष्ट्रद्रोह तो मोदी पर कयों नही विदेश से घोषित हुए देश को बांटने वाले प्रमुख Chief कया मोदी भी जेल जायेगा	HOF	OFFN	hasoc_2020_hi_18
1127581990520098821	RT @insa_jagriti: #SpiritualSunday12thMay @derasachasauda @Gurmeetramrahim इंसान जब सत्संग में आता है तो उसके बुरे कर्म ख़त्म होते चले जाते…	NOT	NONE	hasoc_2020_hi_1273
1127627825886818304	@AsianBabes123 भेनचो ... क्या मस्त पपीते हैं	HOF	PRFN	hasoc_2020_hi_2548
1127614689343614977	Khuaf-e-khuda dekhna ha to musalman ka dekho jo rozay me wuzu ka pani moo me le kr b nahi peeta ♥	NOT	NONE	hasoc_2020_hi_3636
1127584125446119424	@AkhileshPSingh तुम ससुर बुड़बक ही रहोगे ,अरे उ जहाज़वा है न उ बादलवा में छुप जाएगा तो कैसे दिखेगा बुड़बक	NOT	NONE	hasoc_2020_hi_1119
1127485391508987904	केजरी सरजी ने भले 18 टिकट ही बेचे लेकिन 6 करोड़ से एक ढेला कम नहीं किया. उसूलों का पक्के इंसान हैं 👍	NOT	NONE	hasoc_2020_hi_58
1123641769101447168	@Physicsgaurav Ye sale pde likhe chutiya hai 😜🤘	HOF	PRFN	hasoc_2020_hi_1969
1127467335030198275	RT @The_Hot_Summer: फ़िर भी बोलते हैं मोदी ने क्या किया!🙄 जिनको अभी भी नहीं समझ आया वो 23 मई का इंतज़ार करें! अभी तो ट्रेलर था, फ़िल्म तो अ…	NOT	NONE	hasoc_2020_hi_4411
1127640723392581632	RT @RakeshT73827202: फर्जी बाबा हो,प्रमोद! ऐसे ही रोते बिलखते रहोगे! यह मेरा शाप है😠 https://t.co/UeS3TQgipI	HOF	OFFN	hasoc_2020_hi_3577
1127564034729865217	RT @TheFauxyHindi: केजरीवाल की अगली रैली के लिए अलग तरह का बंदोबस्त, थप्पड़ मारना होगा मुशकिल https://t.co/9fzVTn2Pq8	HOF	OFFN	hasoc_2020_hi_4210
1127494753207980033	RT @agrey_sangita: कुछ चमचें Twitter पर तमंचे और बंदूक लिए फोटो डालते हैं 🙄🙄🙄 ये वहीं चमचें हैं जो पूछते हैं चच्चा ये 🐕…	HOF	HATE	hasoc_2020_hi_2042
1127517675075395585	Breaking News बीबीसी और इंडिया टुडे द्वारा कराए गए ताज़ा राष्ट्रीय एग्जिट पोल के मुताबिक: कांग्रेस को 300 सीटे आ रही हैं ! 40 लोकसभा से और 260 गुप्ता टेंट हाउस से !	HOF	HATE	hasoc_2020_hi_1865
1127508388894498817	@ReallySwara @digvijaya_28 @INCIndia @RahulGandhi दिग्विजय जी की उंगली तुम्हारी उंगली से कितनी ज्यादा मजबूत है उसका अंदाज़ तो तुम को अब तक लग ही गया होगा	NOT	NONE	hasoc_2020_hi_1169
1127495457855475717	RT @ShatruganSinha: उपयोग कर एक मजबूत सरकार बनाने में अपना पूर्ण योगदान दें। चूंकि वर्तमान की केंद्र सरकार 'वन मैन शो' और 'टू मैन आर्मी' मा…	NOT	NONE	hasoc_2020_hi_1637
1127768406390796288	RT @RJDforIndia: Breaking: मोदी जी ने वायुसेना लड़ाकों को महत्वपूर्ण सलाह यह दी थी कि बादलों के नीचे से बम वर्षा की जाए। बादलों के ऊपर से ब…	NOT	NONE	hasoc_2020_hi_153
1127611866585296896	RT @ParmarA03: चलो चले माँ!सपनों के गाँव में, काँटों से दूर कहीं, फूलों की छाँव में, चलो चले माँ... हो रहे इशारे रेशमी घटाओं में, चलो चले…	NOT	NONE	hasoc_2020_hi_1022
1123621032449863682	RT @ZeeNewsHindi: #Exclusive: भ्रष्टाचार के खिलाफ थी मेरी लड़ाई, मुझे ही देशद्रोही बना दिया गया- #TejBahadurYadav #AbkiBaarKiskiSarkar h…	NOT	NONE	hasoc_2020_hi_3204
1127771774387507201	@ArvindKejriwal ये विडियो किसी ने भेजा है और #हरियाणा के फरीदाबाद का होने का दावा किया है| इससे क्या फर्क पड़ता है कि ये कब का और कहाँ का है? लेकिन हैरान और दुखी हूँ ये देखकर कि सिस्टम कई बार कितना #नपुंसक हो जाता है? ये नीच #हरकत है🤔 #लोकसभाचुनाव2019 https://t.co/qh1JO4bBRJ	NOT	NONE	hasoc_2020_hi_332
1127549568571269120	RT @abhibajpai09: बचपन में मैं आम के खेत में आम चोरी करके बादल के पीछे छुप जाता था, माली का राडार मुझे पकड़ नहीं पाता था। 😂 #EntireCloudS…	NOT	NONE	hasoc_2020_hi_939
1123781397452349443	RT @Rocking_Naina: बनारस में 90 नामांकन रद्द किए गए हैं। चुनाव आयोग ने भी सिद्ध कर दिया है कि वो चुनाव आयोग नहीं मोदी आयोग है। चुनाव आयु…	HOF	OFFN	hasoc_2020_hi_2458
1123492690950283264	RT @DrGPradhan: .@RahulGandhi को कम मत समझो भक्तों ये भूतों से भी बात करते है https://t.co/MATQ7VAbLX	NOT	NONE	hasoc_2020_hi_4342
1127602932680208384	RT @Krishan71309907: #HappyMothersDay2019 मां और बच्चे दोनों को अपना जीवन जन्म सफल बनाने के लिए संत जो तत्वदर्शी हो उसकी खोज कर उनसे सतभक्…	NOT	NONE	hasoc_2020_hi_947
1127471328032780290	RT @Anant_kmc: देश को सुरक्षित बनाने के लिए ,किसानों की आय दोगुनी करने के लिए, समाज में फैली असमानता को दूर करने के लिए; गरीब, दलित, पीड़ित…	NOT	NONE	hasoc_2020_hi_3810
1127571190208286720	सही कहा डिअर pm	NOT	NONE	hasoc_2020_hi_4351
1123518741764038656	RT @003Gayatri: अब समझ में आया दाल खराब यादव ने जो ड्रामा किया था वो सिर्फ एक ड्रामा था,,टिकट के लिए हद है तुम लोगो की यार @tweetofkt	NOT	NONE	hasoc_2020_hi_2513
1127486331045548032	RT @BrajmohanMalv11: हर धर्म माँ की अपार महिमा का यशोगान करता है।हिन्दू धर्म मे देवियो को माँ कहा गया है।मुस्लिम धर्म मे भी माँ को पवित्र…	NOT	NONE	hasoc_2020_hi_3517
1127514143483809792	RT @Vyangyabaazi: देशभर मे बनाई गयी 100 स्मार्ट सिटी के सारे वोट बीजेपी को जरूर मिलेग ये सब #बुलेट ट्रेन मे चलने वाले लोग है	NOT	NONE	hasoc_2020_hi_3346
1127532413855227905	RT @ModifiedDev: मोदी जी तृतीय श्रेणी में मेरा टिकट था मेट्रो रुक गई रास्ते में ट्रेन छूट गई और कल वोट है बाथरूम के पास खड़ा हू मुझे सर्जि…	NOT	NONE	hasoc_2020_hi_2829
1127582997186658305	वोट जरूर दें...✌ चाहे बीजेपी को, चाहे कमल को, चाहे मोदीजी को... पर मतदान जरूर करें..!! @RahulGandhi @ArvindKejriwal @MamataOfficial	NOT	NONE	hasoc_2020_hi_4171
1127536901768876032	@HarishKhuranna @ArvindKejriwal ओ ओ आपने कंजरीवाल को केजरीवाल लिख दिया ।	HOF	OFFN	hasoc_2020_hi_4414
1127635136567070720	RT @yogrishiramdev: कम्युनिस्टों,ईसाइयों व मुगलों ने अपने राज्य विस्तार के लिए न्याय व कानून के नाम पर 50 करोड़ निर्दोष लोगों का कत्ल किया…	HOF	HATE	hasoc_2020_hi_1866
1127468610119766016	narendramodi_in: उन्होंने देश के लोगों के साथ विश्वासघात किया, देश की उम्मीदों को तोड़ा और ताल ठोक कर कहते रहे- हुआ तो हुआ। जब राष्ट्रहित के बजाय, सिर्फ अपने परिवार का हित सर्वोपरि होता है, तो यही अहंकार, यही घमंड बोलता है- हुआ तो हुआ: PM narendramodi	NOT	NONE	hasoc_2020_hi_974
1127630258583138304	@ShubhamK_45 @mipaltan Dekhte hai	NOT	NONE	hasoc_2020_hi_4050
1123651361462046720	@ArvindKejriwal Backchodi से राजनीती नही चलती कुछ कर्ना भी पड़ता है।	HOF	OFFN	hasoc_2020_hi_474
1127625783252377600	RT @AKTKadmin: @ReallySwara @digvijaya_28 @INCIndia @RahulGandhi जन्नत में एक हूर हर झूठ बोलने पे पैदा होती है, बस इस ट्वीट से 4 हूरें (उचि…	NOT	NONE	hasoc_2020_hi_1501
1127690417481207808	RT @Dr_Uditraj: मोदी जी पैदा हुए सामान्य वर्ग में CM बने तो पिछड़ा वर्ग में शामिल हो गए&amp;अब अति पिछड़ा हो गए हैं।अब देखना है दलित कब बनते…	HOF	OFFN	hasoc_2020_hi_2280
1123636941453291520	@varnishant 2/2 भारत में पैदा हुआ है, अगर कहीं और होता तो अभी तक पागल कुत्ता घोषित कर गोली मार देते । हमें तो तेरे परिवार पर तरस आता है वो 24*7 कैसे झेलते होंगें तभी तू रात के 11 बजे तक टैक्सियों मे घुमता रहता है । अब तो बस 23 मई का इंतजार है कि तेरा भद्दा चेहरा और कितना भद्दा हो सकता है।👹	HOF	OFFN	hasoc_2020_hi_3157
1127529955997487104	23 मई को परिणाम देखकर अपना सिर पटक रहे पगले की पीठ पर दोहत्थड़ जमाकर ठहाका लगाते हुए पितरऊदा कहेगा... ...हुआ सो हुआ😊	NOT	NONE	hasoc_2020_hi_3713
1127516425197735936	@saurabhtop @goairlinesindia चलो कम से कम reply तो दिया! एक हमरा लोकल टमटम वाला है.. -- 3 की जगह 5 बिठाता है, -- अंदर बेठो या बाहर लटको पैसा बराबर लेता है -- बोला ट्राफिक वाले को भी पैसा देना होता है और कल जब एक बगल वाले के सिर में छत लगी तो उसने कहा भैय्या धीरे चलाओ तो बोला,"गर्मी में हवा की मौज लो"!	NOT	NONE	hasoc_2020_hi_105
1127553049822543872	RT @sir_jenishpatel: दिल्ली का महाठग @ArvindKejriwal ने पहले झठे पर्च छपवाकर गौतम गंभीर को बदनाम करने की कोशिश की लेकिन गंभीर ने चैलेंज देक…	NOT	NONE	hasoc_2020_hi_3555
1123495979284484096	#WednesdayWisdom ब्रह्मा विष्णु महेश अजर अमर नहीं है यह स्वयं पुनरावृत्ति में है अर्थात इनकी भी जन्म और मृत्यु होती है। प्रमाण सहित जानने के लिए अवश्य देखें ईश्वर टीवी रात्रि 8:30 बजे https://t.co/uvVcgsJoj6	NOT	NONE	hasoc_2020_hi_445
1127519533147639808	RT @YTaleli: बहकावे में कभी न आना। सोच-समझ कर बटन दबाना . अगर आप ने अपने मत का उपयोग नही किया है , तो आप का कोई अधिकार भी नही है , सवाल कर…	NOT	NONE	hasoc_2020_hi_1215
1123757875803971585	RT @RitikaPiyush: #वेद_मेरा_भेद_है परमात्मा प्रत्येक युग में प्रारम्भ में प्रकट होकर अपना तत्वज्ञान प्रकट करके चले जाते हैं - ऋग्वेद मण्डल…	NOT	NONE	hasoc_2020_hi_3450
1127639582512635905	RT @_Rakshanda_: फेंकू ने 23 मई को हिमालय जाने के लिए अपने कटोरे को साफ कर लिया है अब देखना ये है कि कितने भक्त इनके नई पारी में इनके साथ…	HOF	OFFN	hasoc_2020_hi_619
1123535892277121024	RT @RajkumaarPandey: देश के नव निर्माण में अथक परिश्रम करके अपना अमूल्य योगदान देने वाले समस्त कर्तव्यनिष्ठ श्रमिक बन्धुओं और बहनों को अंत…	NOT	NONE	hasoc_2020_hi_4231
1127670939158597632	@NakuulMehta Kya baaaat hai 🌟🌟🌟👏🏻👏🏻👏🏻👏🏻	NOT	NONE	hasoc_2020_hi_735
1127761338963333120	RT @Rajendr76194898: हे बुड़बक नही कहिये हम जनता लोगन को.... बुड़बक तो आप है, नवीन फेल बउवा के लऊवा. .. हम हूँ जनता लोगन का भी सुनलिया करो…	NOT	NONE	hasoc_2020_hi_3626
1127490751842045952	RT @MLMANDOWARA: आज़मगढ़ से जिस तरह की खबर आ रही है अगर यही ट्रेंड शाम तक रह गया तो निरहुआ कम से कम डेढ़ लाख वोटों से चुनाव जीत जाएगा	NOT	NONE	hasoc_2020_hi_3026
1127469440570773504	RT @VIJAY10008: चलो नफरत पर एक चोट करें चलो "आप" को वोट करें #VoteForJhadu 🔥🔥	NOT	NONE	hasoc_2020_hi_3987
1127495130682875905	मोदी को हटाने के लिए सब महागठबंधन करके एक हो गये, लेकिन 370 हटाने के लिए एक भी नेता ने मुँह नही खोला... देश बड़ा या पार्टी..? लादेन की लाश का कोई अता-पता नही पर, अमेरिका के लोगों ने सबुत नही माँगा क्योंकि.. वहां, हमारे जैसै जयचन्द नही रहते!!	NOT	NONE	hasoc_2020_hi_4203
1127467800593715201	RT @advmonikaarora: जब दुशासन द्रौपदी का चीर हरण कर रहा था तब भीष्म पितामह ने #NOTA का उपयोग किया। उन्होंने कहा मैं तटस्थ हूँ। न मैं दुशासन…	NOT	NONE	hasoc_2020_hi_1094
1127813323183968256	@kaushikn73 @bjplao @aajtak बकलोलवा के पास कॉमर्शियल पायलट का लाईसेंस है ये मत भूलो	NOT	NONE	hasoc_2020_hi_946
1127468618516553728	@KailashOnline आप केंद्र में बैठकर कीर्तन कर रहे हैं ।।	NOT	NONE	hasoc_2020_hi_3174
1123666494494261248	@Kiranja34522516 @ZeeNewsHindi @MehboobaMufti अब इस कुत्तिया में क्या बचा है	HOF	PRFN	hasoc_2020_hi_4185
1127606237820887040	RT @AkshayMarathe: ये आदमी अपने आप को भगवान नहीं समझता ये बहुत बड़ी बात है। https://t.co/8YTCzouhWw	NOT	NONE	hasoc_2020_hi_3317
1123817313277497344	लो, यह अब जाग गये!	NOT	NONE	hasoc_2020_hi_4230
1127566043788873728	RT @AazimSaifi7451: जरूर इसे युगांडा की कानूनी धाराओं के तहत भेजा होगा जेल, बिना कानून तोड़े इंडिया मे तो नहीं है जेल का प्रावधान 🙂 @sarda…	NOT	NONE	hasoc_2020_hi_1872
1127570271655931904	Nobody : Samina peerzada : Kbhi choty hoty Cheri roza raka hai https://t.co/p6dxc6NBIx	NOT	NONE	hasoc_2020_hi_1708
1127491490060689408	RT @Dr_Uditraj: आज मुस्लिम समाज हिन्दू कालोनियों में किराये पर मकान नहीं ले पा रहा है , वैसा ही दलित के साथ भी हो रहा है | देश की इतनी ब…	HOF	HATE	hasoc_2020_hi_1283
1127568589735772161	चाची जलरही हो अब सच्ची 💥😂🤣😀सरबत पीओ	HOF	OFFN	hasoc_2020_hi_4170
1127602144188592128	@Rajnijangid6 @karolbagh_ashrm मां एक सेविका की तरह अपने बच्चों का पालन पोषण करती है, और खुद भूखी रहकर भी अपने बच्चों का पेट भरती है। #HappyMothersDay	NOT	NONE	hasoc_2020_hi_2906
1127529339447332869	पानी की कमी से संकट में मरीज डेंटल कॉलेज में टालनी पड़ी सर्जरी https://t.co/HsTuYezgzy	NOT	NONE	hasoc_2020_hi_2908
1127489153820528640	RT @Being_Sanskaari: मैंने वायु सेना चीफ से कहा अगर बादलों ने धोका दिया तो प्लान B ये होगा 😂😂🤣 https://t.co/2nY9JI6L3k	HOF	OFFN	hasoc_2020_hi_692
1123553256699916289	RT @narpat57: @smritiirani इनके मा बाप के संस्कार है बच्चो में बाट रही है पिक्की	NOT	NONE	hasoc_2020_hi_3356
1127810676565495808	मदरसे में मौलवी ने मासूम बच्चे को बनाया हवस का शिकार। इतनी भी क्या चुल होती है इनको 😡 https://t.co/3MZL2SX6RK	HOF	OFFN	hasoc_2020_hi_3897
1127629528795353088	RT @PalakSharma0098: #MothersDay मां हमारी गलती को तो माफ कर देती है, छुपा देती है लेकिन कर्म फल को भोगने से हमें नही बचा सकती। जाने उस पर…	NOT	NONE	hasoc_2020_hi_371
1127643038652583937	RT @RajaniSi4: अब जहर खाने के अलावा कोई रास्ता नही है 😁😁😁😁 https://t.co/DkHFNv7QX2	NOT	NONE	hasoc_2020_hi_4226
1123568293258899459	RT @MamtaDaasi: #वेद_मेरा_भेद_है नकली धर्मगुरुओं को ज्ञान होता तो ,ब्रह्मा ,विष्णु, महेश के माता पिता का नाम बता देते इन को कुछ भी ज्ञान न…	HOF	HATE	hasoc_2020_hi_2052
1123610043356598273	RT @tejbahadursp: हार नहीं मानूंगा, रार नहीं ठानूंगा	NOT	NONE	hasoc_2020_hi_4219
1123570390436126720	@priyankagandhi मैडम ये है कांग्रेस https://t.co/0lqTUhbGz9	NOT	NONE	hasoc_2020_hi_1553
1127793568007909376	RT @AjayKum13838284: दोस्तों आज मैं एक जमीनी हकीकत बताता हूँ यहाँ बहुतो ऐसे लोग है जो दोहरी नागरिकता लेकर 2-2 राज्यो में सरकारी फायदा उठाते…	HOF	HATE	hasoc_2020_hi_833
1127617256236535808	RT @navjivanindia: #PMModi के खिलाफ चुनाव लड़ने वाले किसान सुनापू इश्तारी ने कहा कि हमें पुलिस और इंटेलिजेंस ब्यूरो के अधिकारियों ने हर जगह…	NOT	NONE	hasoc_2020_hi_184
1127724424918994944	RT @OshoPrabhakar: सिद्धार्थ उपनिषद निरति का अर्थ है भीतर देखना, दिव्य प्रकाश को निराकार में देखना। केवल दिव्य प्रकाश देखना दर्शन है, निर…	NOT	NONE	hasoc_2020_hi_282
1127612004972126209	@anuragdhanda ई.सी. हरामी हैं जो गुंडो को शह देता हैं । इस ई. सी. को इसके कर्मो की सजा मिले ।	HOF	PRFN	hasoc_2020_hi_1741
1123515294054481922	तेज बहादुर यादव के बहाने हरियाणा भी देख रहा होगा कि फ़र्ज़ी राष्ट्रवाद के चक्कर में वर्षों से भाजपा का साथ दे रहे थे। आज तेज बहादुर चुनाव लड पायें या न लड पायें लेकिन अब वो भाजपा के खिलाफ बड़ी लडाई के लिये तैयार... https://t.co/fonFv0tLoY	NOT	NONE	hasoc_2020_hi_2245
1127528878065442816	Kamrak hai, lekin since English mein Star Fruit hai naam, toh Karan Johar pakka agli movie mein launch kar sakta hai. https://t.co/LuqMDwYlKa	NOT	NONE	hasoc_2020_hi_3090
1127562730284695553	@ppbajpai जब कोई १९८४ दंगे के लिए माफ़ी की दरख्वास्त करता है तो क्या उसे २००२ के दंगों के लिए माफी नहीं मांगनी चाहिए ???? नागरिक तो दोनों ही हैं।	HOF	HATE	hasoc_2020_hi_1475
1123792885684502528	RT @saurabhdave05: @RubikaLiyaquat कांग्रेस के प्रचार में बहुत सारे पत्रकार लगे हुए है ।	NOT	NONE	hasoc_2020_hi_190
1127736114444263424	@IIGoDMomll @benmoha दिग्गी क्या देख रहा है ? https://t.co/LLT7M4jn0J	NOT	NONE	hasoc_2020_hi_2976
1123493269743308800	RT @atanshumman: @_Unique_Princes @iamsolanki_ नाक है ही कहा, जो रागड़े गा यह तो बस दिखावा है नाक तो वही इटली मे रेह गई	HOF	OFFN	hasoc_2020_hi_1132
1127617558239227905	RT @MLArajeshSP: मुझे हराने वाला कोई पैदा नही हुआ, भगवान् के विधान को बदलने की ताकत है मुझमें - #निहुरवा ये सुनते ही मोदी ने #निरहुआ को जीत…	NOT	NONE	hasoc_2020_hi_1436
1127466546526187521	और जो ब्यूटीफुल नहीं है उनके लिए क्या 😡😡😡😡😡😡😡😡😡😡😡😡😡😡😡😡😡😡😡😡😡😡😡😡😡😡	NOT	NONE	hasoc_2020_hi_1413
1127799599400284160	@mlkhattar MuM जी, कुछ तो शर्म कीजिये !! https://t.co/6EaWWyyWiR	NOT	NONE	hasoc_2020_hi_3683
1127600793597595649	RT @SheelaDasi5: #RamadanMubarak मांस खाने का आदेश अल्लाह का नहीं है। हजरत आदम के शरीर में कोई पित्तर आ कर प्रवेश करता था। वही माँस खाने का…	HOF	HATE	hasoc_2020_hi_1090
1127526579569975296	बार-बार थप्पड़ मारने से अच्छा है… मुझे कहीं बांध के बेल्ट से मार लो बे:- केजरी…🙈	HOF	OFFN	hasoc_2020_hi_2474
1123814490540265472	क्या काँग्रेस जाँच करायेगी ?	NOT	NONE	hasoc_2020_hi_3424
1123516241962909696	RT @rpsinghkhalsa: इनको भी एक टीशर्ट भेजो और उस पर लिख भेजो की, मै बग्गा नही बाघ हूँ,और भारत की संप्रभुता का चौकीदार हूँ। और हाँ नीचे ता…	NOT	NONE	hasoc_2020_hi_1946
1127471898458116096	RT @Mizaaj_: जब दुनिया की ठोकरों से बड़ा बेचैन हो जाता हुँ, मैं माँ के कदमो में सर रख कर सो जाता हुँ। #Mizaaj	NOT	NONE	hasoc_2020_hi_3855
1127589246666190848	sambitswaraj Kutta hai saala, saara din bakwaas karta rehta hai	HOF	OFFN	hasoc_2020_hi_375
1127593029936734210	RT @ManishT69890608: वर्तमान #69000_शिक्षक_भर्ती में योग्यता के साथ एकल बेंच ने जो मजाक किया है अब माननीय सुप्रीम कोर्ट ने ये तय कर दिया है…	NOT	NONE	hasoc_2020_hi_1153
1127601976403845121	#MenToo अब क्या पुरुष अपनी मर्ज़ी से रीति रिवाज़ भी नहीं मान सकते ? इंजीनियर पति ने चोटी नहीं कटवाई तो एमबीए पत्नी ने तलाक की अर्जी दी ब्राह्मणपति नेकहा- तलाक मंजूर है, लेकिन चोटी नहीं कटाऊंगापत्नी ने कहा- पति का चोटी रखना मेरे स्टैंडर्ड का नहीं है ! https://t.co/3GXWzIyeP8	NOT	NONE	hasoc_2020_hi_4136
1127772105737588736	RT @AkhileshPSingh: प्रत्यक्षम किम प्रमाणम पोल खोल के रख दी @INCIndia की @divyaspandana ने हर सवाल हर जबाब हर इन्टर्ब्यू फ़िक्स है @nare…	NOT	NONE	hasoc_2020_hi_871
1123592737675141120	RT @AmanChopra_: जो लोग पुलवामा हमले के बाद @ImranKhanPTI की नौटंकी पर उन्हें शांति दूत और मसीहा बता रहे थे। मोदी को इमरान से सीखने की सलाह…	NOT	NONE	hasoc_2020_hi_1078
1123613264611397638	RT @TajinderBagga: अगर नेहरू जी देश का बंटवारा न करवाते तो पाकिस्तान नही होता, अगर पाकिस्तान नही होता तो आतंकवाद न होता, अगर आतंकवाद न होता…	NOT	NONE	hasoc_2020_hi_740
1127779605182500864	RT @BebakAawaj: @yadavakhilesh भाजपा के ऊपर खतरों के बादल मंडरा रहे है जनता ने उन्हें रडार में ले लिया है।	NOT	NONE	hasoc_2020_hi_3873
1123510869055270912	RT @IntolerantMano2: अब चौकीदार क्या है ? मैं एक बार में उस 10 जनपत के गधे के मुँह से सुनना चाहता हूँ	HOF	OFFN	hasoc_2020_hi_727
1127786739668533248	@yadavakhilesh पप्पू को स्मृति और अखिलेश को पटकेगा निरहुआ, ममता की तो छोड़ो, भतीजा बचेगा ना बुआ। "हुआं तो हूआं"🤣	HOF	OFFN	hasoc_2020_hi_2236
1123803195267002369	@seriousfunnyguy केजू का रोड शो, वो भी फ्लॉप ।।।।इसमे भी जरूर मोदीजी की साजिश होगी 😂😂	NOT	NONE	hasoc_2020_hi_2988
1127581533345202176	@KirronKherBJP हाहाहा हाह .. इसका मतलब अनुपम खेर की नौकरी पक्की	HOF	OFFN	hasoc_2020_hi_88
1123478153463238657	RT @LalitMa54440950: जिसकी पत्नी नहीं है वो भगवान राम के पास जा कर क्या करेंगे झूठे लोगो का भगवान राम के पास कोई जगह नहीं है इसलिए भारतीय भ…	NOT	NONE	hasoc_2020_hi_2403
1127475161613996033	RT @sanjay_dimpy: सभी जगह से सुचना आ रही है की भाजपा अपनी सातों सीटें आम आदमी पार्टी से हार रही है। कांग्रेस पिछड़ रही है।	NOT	NONE	hasoc_2020_hi_72
1123595946330214400	RT @jaijaicongress: #मोदी_है_तो_मुमकिन_है इसको कहते है भक्तो का थर थर काँपना मगर हमको अच्छा लगा बनारस मे #रंगा_बिल्ला ने #तेजबहादुर_यादव…	NOT	NONE	hasoc_2020_hi_2367
1127578429560217600	@ArvindKejriwal @guru9899 बाकी लोगो का वोट आपको नहीं चाहिए😠😠😠	NOT	NONE	hasoc_2020_hi_3038
1127463186859323392	RT @BJP4India: जब इन लोगों को मौका मिला तो इन्होंने NRHM घोटाला कर दिया, एंबुलेंस में घोटाला कर दिया। जब मुझे सेवा का अवसर मिला तो देश के…	HOF	HATE	hasoc_2020_hi_361
1127798370486112261	@ameytirodkar फेकेंन्द्र रडार महाराज की जय हर हर रडार घर घर रडार भक्त है तो मुनकीन है 🙏😀😎🙏 https://t.co/W7XRaefLNp	HOF	HATE	hasoc_2020_hi_615
1127603578627977218	@News18India ममता तेरी गुण्डागर्दी नही चलेगी नही चलेगी	HOF	OFFN	hasoc_2020_hi_2181
1127562075977314304	RT @DeepsUnique3434: @narendramodi #चार_उंगली_से_वोट_डालने_वाला #संसार_का_एकमात्र_प्राणी और कुछ चमचों को लगता है ये आदमी देश चलाएगा.. 🙄🙄…	HOF	PRFN	hasoc_2020_hi_1259
1123495903774400512	RT @AkhterH007007: नोटबन्दी और GST ने असंगठित क्षेत्र में नौकरी करने वालों को पूरी तरह से तहस नहस कर रख दिया , विशेषकर दिहाड़ी मजदूरों को…	NOT	NONE	hasoc_2020_hi_31
1127559416797106177	कुछ बवासीर वाले भक्त आज भी पूरा दर्द पिछवाड़े में झेल कर भा जा पा के गीत गुनगुना रहे हैं मजबूरी में क्योंकि बवासीर नाम ही कुछ इस तरह की बीमारी का है कि दर्द झेल कर भी हंसना पड़ता है	HOF	PRFN	hasoc_2020_hi_2856
1127572658218889217	RT @Ravikan03251268: जनता अब बहुत समझदार हो चुकी है, उनको पता है के किसका किस चीज़ से स्वागत करना है। #ठोको_ताली😂😂 फॉलो @Ravikan03…	NOT	NONE	hasoc_2020_hi_749
1127715063220047878	RT @paramjeetuk: मेरे खिलौनों को संभाल कर रखती थी मेरी माँ जब थक, हार, खेल कर, सो जाता था मैं मुझे पलू से अपने, हवा देती थी, मेरी माँ जब ग…	NOT	NONE	hasoc_2020_hi_3726
1127553225987465216	कुछ समझे दया - वह भोसड़ी वाले पड़ोसी कुछ तो बताना चाहते थे 🤔🤔🤨🤨	HOF	PRFN	hasoc_2020_hi_1992
1127621463119253505	RT @OfficeofSSC: @ChouhanShivraj धीरे-धीरे कर कांग्रेस ने गरीबों के कल्याण के लिए चलाई जा रही योजनाएं बंद कर दी। संबल योजना बंद कर दिया। इस…	NOT	NONE	hasoc_2020_hi_496
1127501384402649089	@pbhushan1 अपने चेम्बर मे हुई ठुकाई भूल गए क्या ।	HOF	OFFN	hasoc_2020_hi_1981
1127481054602731520	RT @SChaudharyINC: BJP ने मुझे चुनाव न लड़ने के लिए 20 करोड़ का ऑफर दिया था और बोला गया की अगर में चुनाव में नही बैठा तो अंजाम बुरा होगा, प…	HOF	HATE	hasoc_2020_hi_2104
1127756117088432129	RT @sunilku18931742: #Ramadan #Ramzan2019 कुरान शरीफ का ज्ञान दाता कहता है कि उस अल्लाह की शरण में जाने के लिए किसी तत्वदर्शी संत से जाकर…	NOT	NONE	hasoc_2020_hi_3585
1127558892521525248	कुछ समय रहते ही मैंने अपना वोट डाला है। https://t.co/haZC2YQws3	NOT	NONE	hasoc_2020_hi_2237
1127781350017327104	अभी-अभी 1 किलो आम 🍋 खरीदे हैं...ये पूछना था कि काट के खाऊं या चूस के 😕 मतलब मज़ा कैसे आएगा	NOT	NONE	hasoc_2020_hi_301
1123522898323369984	@nidhidynamic तुम्हारा कांग्रेसियों का अतीत देखो फिर लांछन लगाना तुम लोग के पास ही शेर नहीं पूरे लोमड़ी प्रियंका गधे पप्पू भरे पड़े है तुम्हारी तो औक़ात भी नहीं की शेर पैदा कर सके इसलिए तुम लोग भांड मीडिया के साथ मिलकर गधों को शेर बनाने की कोशिश करो प्रियंका का अतीत चोर की बीवी क्यों भागी	HOF	OFFN	hasoc_2020_hi_3485
1123590091056799745	@imtariq07 😂😂 IPL ट्रॉफी का तो पता नही लेकिन ये बंदा WC2019 की ट्रॉफी जरूर लायेगा ❤️😍 The Virat Power 💪	NOT	NONE	hasoc_2020_hi_2732
1127563950818639872	RT @PandeAshesh: जमाना क्या सोचेगा ये मत सोचो क्योंकि जमाना बहुत अजीब है नाकामयाब लोगों का ये मज़ाक उड़ता है और कामयाब लोगों से जलता…	NOT	NONE	hasoc_2020_hi_540
1123513918326886400	ये शायद लोग भूल गए😂 https://t.co/ZniLNLlD3c	NOT	NONE	hasoc_2020_hi_3580
1127490244343783436	@NituTiw81600052 मैं तो खाली मटन में मैदे की रोटी दो बार डूबकर खाता हो और चाय तो पिता ही नहीं 🤣🤣🤣🤣🤣	NOT	NONE	hasoc_2020_hi_2971
1123646697408684032	पप्पू है तो सब नामुमकिन है। #ModiHaiTohMumkinHai	NOT	NONE	hasoc_2020_hi_3352
1127546712245936132	फिर सबका ब्याह हो गया 😝😝	NOT	NONE	hasoc_2020_hi_3300
1123814318552899585	RT @_radha__: देखी आज चाँद को जब चुप लगा कर बैठे बेबसी में उसकी कुछ एक आँसू मेरे बह गए	NOT	NONE	hasoc_2020_hi_4195
1123715542714593284	RT @Diva_Rizvi: नीच गंवार भक्तों की खुशी बता रही है फर्जी चौकीदार केवल चोर ही नही बल्कि कायर और डरपोक भी है जो एक सेना के जवान से मुकाबला…	HOF	OFFN	hasoc_2020_hi_4148
1127498490345484288	RT @DesiStupides: @dhruv_rathee रवीश कुमार रॉक्स! कल रवीश कुमार का दमदार इंटरव्यू देखकर कुछ गोदी पत्तलकार बुरा लग गया। दिल्ली में बरनोल…	NOT	NONE	hasoc_2020_hi_2128
1123544440243724288	RT @FasterMK: तांगे में बंधा हुआ घोड़ा देखा है आपने ? उसकी आँखों पर साइड में पट्टी लगा दी जाती है ताकि उसको सामने सड़क के अलावा कुछ ना दिखे…	NOT	NONE	hasoc_2020_hi_4409
1127572763084910593	समझ गए .😊	NOT	NONE	hasoc_2020_hi_1007
1123584294541074433	RT @Nationalist_RSS: @ArvindKejriwal धब्बा with अब्बा https://t.co/ZZTU6NDbaf	HOF	OFFN	hasoc_2020_hi_823
1127515418539638786	@laluprasadrjd जेल में मोबाइल एलाऊ है लूटो लूटो खूब मजे लूटो बेरोकटोक चलाओ मोबाइल	HOF	OFFN	hasoc_2020_hi_1274
1123657938118176768	RT @akhileshsharma1: अब इस बयान के लिए चुनाव आयोग ने राहुल गांधी को नोटिस जारी कर दिया है। उनसे 48 घंटे के भीतर जवाब माँगा गया है। https://…	NOT	NONE	hasoc_2020_hi_4273
1127639330883719168	RT @KhannaPal: @dilipkpandey यह विडियो एक और बात की और इशारा करता है कि जहां वोटिंग होती है वहां सभी पार्टियों के एजेंट रहते हैं यह सब बिना…	NOT	NONE	hasoc_2020_hi_3579
1127476340205080582	RT @geeta_phogat: माँ तो माँ है, इनका दर्जा सर्वोच्च हैं ❤️ #happymothersday https://t.co/p8GgBVK0Vp	NOT	NONE	hasoc_2020_hi_507
1123803283343192066	RT @SaintRampalJiM: दुर्गा ने अपने पुत्र ब्रह्मा जी को क्या कहा ! #GodMessage https://t.co/PNeg0gQQEE	NOT	NONE	hasoc_2020_hi_2671
1127794566256578560	RT @Suhana_Speaks: मुझे कोई हराने वाला पैदा नही हुआ, मैं ईश्वर का लिखा भी मिटा सकता हूँ ~ @nirahua1 इतना तो "एलबर्ट मोई जी" भी फैकते बे…	NOT	NONE	hasoc_2020_hi_4076
1127554660460445697	RT @abpnewshindi: वोट डालने के बाद बोले @ArvindKejriwal - दिल्ली के विकास के लिए वोट करें, देश में नफरत फैलाने वाले के लिए नहीं #LokSabhaE…	NOT	NONE	hasoc_2020_hi_2664
1127483860596322304	गद्दारों की छाती पर चोट करके आया हूं राष्ट्रहित में वोट करके आया हूँ....🇮🇳😆 मैं भाजपा की ईमानदार सरकार को वोट करके आया हू https://t.co/aOni4GOiPB	NOT	NONE	hasoc_2020_hi_3725
1127736869414789120	RT @Banas_____1213: इश्क़ से उसको जो छू लूँ तो महक जाती है बाहों में अपनी जो घेरुं तो #बहक जाती है वो उसका #जिस्म है जैसे कि आग का दरिया अ…	NOT	NONE	hasoc_2020_hi_2702
1123633158161932288	RT @Shalusinghsp: जब से हुआ है देवर के हथ्यार ए चुदाई का दीदार 💋 तब से उसके नीचे आने को थी में बेकरार💋 जब लिया उसने आगोश में अपनी ओर खोली…	HOF	PRFN	hasoc_2020_hi_490
1123758458799521792	RT @anuraagmuskaan: कमाल है, अभी तक किसी ने यूएन द्वारा आतंकी मसूद अज़हर को ग्लोबल आतंकी घोषित किए जाने को आचार संहिता के उल्लंघन का मामला…	NOT	NONE	hasoc_2020_hi_2108
1127747426465370113	"अपने सभी कार्यों में सफल होने के लिए, संदेह को दूर करें और आत्मविश्वास विकसित करें" ~ बाबूजी. https://t.co/4pl1Cko9F2	NOT	NONE	hasoc_2020_hi_2674
1127740359071752197	5odayja os main hota kiya hai	NOT	NONE	hasoc_2020_hi_524
1123585930311299073	RT @kishankumar0791: अगर हिन्दू रीती रिवाज़ को नहीँ मानते हो तो ये जूठा स्वांग रचने की क्या जरूरत है श्रीमती जी?🤷 🤦 https://t.co/rkPZgHflRs	NOT	NONE	hasoc_2020_hi_3614
1123676531467915267	RT @CaDalmia: ये @smritiirani पति चोर ही नहीं fund चोर भी है, मध्य प्रदेश में भी घपला और गुजरात में भी https://t.co/9ganLQ9ldc	HOF	OFFN	hasoc_2020_hi_899
1127763595524067328	RT @gops333: जब नाश मनुज पर छाता है पहले विवेक मर जाता है फिर वो भाजपा जॉइन करता है #EntireCloudCover	HOF	OFFN	hasoc_2020_hi_3716
1123586215511379968	RT @immortalsoulIN: 🇮🇳भारत के लिए बड़ी कूटनीतिक जीत🇮🇳 संयुक्त राष्ट्र ने मसूद अजहर को वैश्विक आतंकी घोषित किया...!!! मोदी है तो मुमकिन है…	NOT	NONE	hasoc_2020_hi_1194
1127559660062613505	RT @Chanuangel143: किसी ने कहा अच्छे कर्म करो तो स्वर्ग मिलेगा मै कहती हूँ माँ बाप की सेवा करो जमी पे ही स्वर्ग मिलेगा https://t.co/tAlVZFW…	NOT	NONE	hasoc_2020_hi_367
1127804078933700608	@ANINewsUP मायावती को बहुत बुरा लगा की मोदी जी ने बुआ कहा। मायावती की माँ और बाप भी उनको बहनजी कहते है क्या मोदी जी आप सबकी दुखती नस पहचान जाते है। बहनजी रात भर सो नहीं पाई और सुबह सुबह सबके सामने रो रही है की मोदी जी ने ये कहा वो कहा। रहम करो दलित बहन जी पर।	NOT	NONE	hasoc_2020_hi_932
1127613674309525504	RT @iashwathama: एक बार बिहार वालों ने गलती से लालू को चुन लिया, उसके बाद बिहार सबसे पिछड़ा राज्य बना। ठीक वही गलती यूपी वालों ने माया-मुला…	NOT	NONE	hasoc_2020_hi_119
1123583313065570305	@rahatindori अपनी कहानी तुम्हें अच्छी नहीं लगी बात करता था मोहब्बत की पर बदनामी अच्छी नहीं लगी	NOT	NONE	hasoc_2020_hi_2606
1127791605094678528	RT @SanjeevYadav_IN: सुबह सुबह भोजन में इतनी व्यस्त हैं कि मैंने गलती से पौधा उखाड़ दिया तो पौधा छोड़ा ही नहीं। फिर मैंने इनको उठाकर दीवार…	NOT	NONE	hasoc_2020_hi_817
1127473018341453825	RT @shantilalthak11: राहुल क़ा "बाप चोर है" में वाकई दम था । 4 दिन हो गये कांग्रेसी चमचों के मुँह से नही सुना "चौकीदार चोर है"😂😂	HOF	OFFN	hasoc_2020_hi_4262
1127598352512610306	RT @KapilMishra_IND: आतिशी का हर झूठ बेनक़ाब - किसी अखबार में कोई पर्चा नहीं आया - हर बात झूठ निकली, रोना भी नकली - गौतम गंभीर के ख़िलाफ़…	HOF	OFFN	hasoc_2020_hi_1203
1127477384611942400	RT @VikrantShukla_: @DrKumarVishwas चोट करोगे कपूतों पर तो दर्द कहीं और से उठेगा 2014 से जनता के सामने वो सारे कपूत मुखर होकर आ गए लोकतंत्…	HOF	HATE	hasoc_2020_hi_517
1127810559141801984	RT @Ajaiveer2: दुनिया में ऐसा चुनाव कभी कहीं नही हुआ होगा जिसमे न महंगाई न भरस्टाचार न विकास कोई मुद्दा नही है बल्कि विपक्षी राजनीतिक दल मौ…	NOT	NONE	hasoc_2020_hi_290
1123779426154614785	RT @iMac_too: सही कहा, बहन जी @Mayawati । अब यह भी बता दो की किसकी सरकार से इस्तिफा दिया था और कौन प्रधानमंत्री था । https://t.co/0hjNjpZ1fW	NOT	NONE	hasoc_2020_hi_967
1127544845768093698	@_The_Daredevil @kamaalrkhan @KRKBoxOffice @msdhoni IPL पैसों के लिए हो रहा है, देश के लिए नही	NOT	NONE	hasoc_2020_hi_4060
1127545634330824705	@Mayawati राजनीति मे बहनजी के नाम से मशहूर है आप आपने कितने दलित भाइयों को तोफे मे आपने ऐसा गिफ्ट दिया जिससे उनका कल्याण हो गया आप कहा थी आज कहा है इसका हिसाब दे	NOT	NONE	hasoc_2020_hi_1739
1123501079562317824	RT @anjuydv: जो देश के 42 #जवान शहीद करवा सकता हैं, उसके लिए अपनी कुर्सी के वास्ते #TejBahadur को “अयोग्य” ठहराना कोई बड़ी बात नही 🤔 https:…	NOT	NONE	hasoc_2020_hi_3472
1127592778282569728	@ashutosh83B मोदी का #मजाक उड़ाने वाले उड़ाते रह गए और #मोदी #पीएम बनकर #करोड़ों का #दिल #उड़ा ले गए🤗😉 तुम आज अपनी औकात देखो जलनखोर, चुल्लू भर पानी में डूब मरो😜	HOF	HATE	hasoc_2020_hi_1294
1123626799622000641	@RubikaLiyaquat दरबारी पत्रकार है हमारी बहन पहले ऐसी नही थी 😆😆	HOF	OFFN	hasoc_2020_hi_3041
1127790950783209473	@SrBachchan ❤️❤️❤️नीचे तुम्हारी आंटी बहुत से अंकल को लेकर आयी है❤️❤️❤️	NOT	NONE	hasoc_2020_hi_3850
1127535765112492033	RT @mlkhattar: दिव्यांगजनों ने चुनाव में बढ़-चढ़कर हिस्सा लेकर अपनी भागीदारी सुनिश्चित की और दिखा दिया कि वो भी किसी से पीछे नहीं। पुलिसकर्…	NOT	NONE	hasoc_2020_hi_759
1127610201433989121	@singharti411 @5624114 पहले हिन्दी तो लिखना सीख ले ढंग से 🙄🙄	NOT	NONE	hasoc_2020_hi_2682
1127806389978652672	RT @KamleshDassi1: #BlackSpotOnJudiciary इस भ्रष्ट सरकार ने मीडिया से मिलकर एक बार भी नहीं सोचा कि 2014 मैं 18 नवंबर को जो बरवाला कांड करवा…	HOF	HATE	hasoc_2020_hi_4250
1127617528870645760	@Amitshah कमाल है ये वर्तमान #भारत_सरकार जनता छाती पीट-पीटकर दिनरात इनसे #भ्रष्टाचार के स्यापे कर रही है और ये क्या कह रहे है⁉ यानि जनता की औकात बतारहेहैं⁉ रोतीरहे/पिटतीरहे जनता..‼ये अति पॉवरफुल सत्ताधारी खुद को #गरीब #दलित #पिछडा ...बता बताकर सिंपैथी गेन गेम में लगे हुए है	HOF	HATE	hasoc_2020_hi_2888
1127665083880886272	@Aabhas24 आप जितना भी समझा लो कंबल चोर जोशी नहीं समझेगा। उसका आईक्यू राहुल गांधी से भी ऊपर है।	HOF	OFFN	hasoc_2020_hi_2621
1123539402897051650	RT @VishalGaur1111: हजारो लोग मरे, मीडिया ने नहीं दिखाया 🤔 किसी को कानो-कान खबर नही हुई और फिर भी मोदीजी को पता चल गया?पर कैसे? सर आप इतना…	NOT	NONE	hasoc_2020_hi_4284
1127467930654871557	@ANI यह जिंदा है अभी ?????	NOT	NONE	hasoc_2020_hi_2151
1127478819051278336	RT @RishiPrasadOrg: ईश्वर किसीको प्राप्त नहीं होता, ब्रह्म किसीको प्राप्त नहीं होता बल्कि प्राप्त हुआ-सा लगता है।वह भी किसको? जिसको नहीं मि…	NOT	NONE	hasoc_2020_hi_3238
1123622890509725696	Dear Rahul #MasoodAzhar Gandhi @RahulGandhi https://t.co/ao7R3OsPo1	NOT	NONE	hasoc_2020_hi_4152
1123486936365244417	* "Barra Ghazab Ka Nazara Hai Is Duniya Ka,__! : Log Sub Kuchh Jama Karnay Mein Lagay Hain Khaali Haath Jaanay Ke Liye,__!! #0316-6...	NOT	NONE	hasoc_2020_hi_2704
1127573056686137344	RT @Neeraj_chopra1: @realshooterdadi राम राम दादी जी 🙏भगवान आपको जल्दी ठीक करे ओर आप अपने जोश ओर जुनून से सभी को प्रेरित करती रहें 🙏💪	NOT	NONE	hasoc_2020_hi_2276
1127461966342082560	RT @keshavyadaviyc: हर गरीब ,किसान ,युवा,मजदूर और महिलाओं की आवाज सिर्फ कांग्रेस पार्टी है। कांग्रेस पार्टी की विचारधारा से ही देश का विकास…	NOT	NONE	hasoc_2020_hi_1675
1127487035684429824	RT @msisodia: मोदीवाद को राष्ट्रवाद बताने वालों से मैं पूछना चाहता हूँ- - क्या बिना मजबूत शिक्षा व्यवस्था के कोई राष्ट्र मजबूत हो सकता है?…	NOT	NONE	hasoc_2020_hi_1650
1127790485177868289	RT @Rocking_Naina: अर्ज़ किया है.....😎 इतना फेंकता है कि आराम नहीं करता, सुना है बादलों में रडार काम नहीं करता..! 😂😂😂	NOT	NONE	hasoc_2020_hi_2316
1127609324799385600	RT @MKS1703: इस बन्दे ने साबित कर दिया कि इंसानियत से बड़ा कोई धर्म नही होता और हमारे देश के तथाकथित धर्म के ठेकेदार हिंदुस्तान की इस इंसा…	NOT	NONE	hasoc_2020_hi_152
1127462868129959936	RT @SanjeevSanskrit: शतहस्त समाहर सहस्त्रहस्त संकिर। (अथर्ववेद ३.२४.५) हजार हाथों से कमाओ व सैंकड़ों हाथों से दान करो.	NOT	NONE	hasoc_2020_hi_1725
1127799247116464128	RT @ImAnkitadave: फूल चाहे कितनी भी ऊँची टहनी पर लग जाये, लेकिन... मिट्टी से जुड़ा रहता है तभी खिलता है.….!! https://t.co/LJnkF7GEmw	NOT	NONE	hasoc_2020_hi_4207
1127490210764247040	RT @anandagarwal554: घड़ी का बटन दबाया पर वोट भाजपा को गया:शरद पवार सतारा सीट भाजपा नहीं शिवसेना लड़ी है फिर भी एक बार ज़हर खाकर देख ले.	HOF	OFFN	hasoc_2020_hi_2035
1127623224735326208	RT @92mhq6QNslesNLP: मैं :-- हैप्पी मदर्स-डे मम्मी ❤ मम्मी :-- हाँ वो सब तो ठीक है , फ्रिज में पानी भर दे पहले 😣 #HappyMothersDay	NOT	NONE	hasoc_2020_hi_701
1127602353870397440	@BBCHindi अब जनता भेज रही है बादलों में	NOT	NONE	hasoc_2020_hi_1733
1123615458203070464	@OddNaari @aajtak रंजन भटका क्वालिफिकेशन नही के बराबर, फिर भी दोबारा मिल गया चान्स एलआयसी की एजंट बादमे काँर्पोरेटरको !क्या खूबी है? क्या रुबाब है?	NOT	NONE	hasoc_2020_hi_907
1127609853290004486	इसी लिए इनकी सेवा से डर लगता है यह पागलपन है	NOT	NONE	hasoc_2020_hi_4103
1123749285890330626	RT @seematri6: @LambaAlka अरे गंवार, अनपढ़ तुम्हे इतना भी नहीं पता कि जवान होने से पहले ही उन्होने घर परिवार छोड़ दिया था। रही राजनीति की…	NOT	NONE	hasoc_2020_hi_2150
1127653276940263424	@smitaprakash ये बंगाल मे सबसे ज्यादा वोटिंग कैसे हों जाती है यार🤔🤔🤔	NOT	NONE	hasoc_2020_hi_3359
1123569434126442496	RT @manojkjhadu: बेशर्म बड़बोलेपन की कोई हद नहीं...उड़ी, पठानकोट और पुलवामा के बाद भी मान्यवर @narendramodi ji अयोध्या में कहते हैं 2014 के…	NOT	NONE	hasoc_2020_hi_1492
1127796910884962304	RT @1SAFFRONGIRL: सरकारें आती जाती रहेगीं मुझे ये बतायो की हैनडसम लडके किस पोलिग बूथ पर दे😏😏 बूथ का पता बता दो 😍🙈…	NOT	NONE	hasoc_2020_hi_3669
1123619224700608515	RT @prem_pandey05: लोग कहते हैं इतना ज्ञान कहा से लाते हो.. मैंने कहा हम कॉलेज के पीछे बैठा करते थे क्लास में नहीं... 😆😝😂😉	NOT	NONE	hasoc_2020_hi_3270
1123750107957088258	RT @Deepa1804: #AsianCup2019 #हिंदुओं_के_साथ_छलावा हिंदू धर्म गुरुओं ने अपने ग्रंथों को ना समझ कर जनता को लोक दंतकथा के आधार पर ब्रह्मा,वि…	NOT	NONE	hasoc_2020_hi_3982
1123681665321246720	@Yogita_singh11 नकली गाँधियों की तरह अपने बाप के नाम पर जीने वाले सिर्फ कुत्ते होते हैं, और कुत्तों को भोंकने के अलावा कोई काम नहीं होता। राजस्थानी के नाम पर कलंक, गद्दारों के जूते चाटने वाले वही राजस्थानी हैं जिन्होंने मुगलों का साथ देकर अपने ही भाइयों को मरवाया था।	HOF	HATE	hasoc_2020_hi_1113
1127599120057659393	RT @BoltaHindustan: 'आयुष्मान योजना' की तारीफ कर रही थी सुमित्रा महाजन, भड़क उठे डॉक्टर, बोले- इस योजना ने हमें बर्बाद कर दिया #SumitraMah…	NOT	NONE	hasoc_2020_hi_1931
1127611258390212613	साल में सिर्फ पांच घंटे ही खुलता है ये मंदिर,एक साथ दी जाती है हजारों बकरो की बलि https://t.co/sQXweSwkXh via Dailyhunt डाउनलोड करें: https://t.co/QdScFADMW6	HOF	HATE	hasoc_2020_hi_2808
1127765331936731137	@GireeshSikarwar जी पूरी कोशिश करता हूं भ्रष्टाचार उजागर करने का	NOT	NONE	hasoc_2020_hi_392
1127582846183329792	RT @Aman_Yadav0912: @DesiStupides चुनाव आयोग नही, चमचा आयोग।	HOF	HATE	hasoc_2020_hi_3065
1127504446265577472	RT @RamSinghJadon6: ब्रेकिंग न्यूज काशी विश्वनाथ मंदिर से गंगा नदी तक सड़क की चौड़ाई बढ़ाने के लिए मोदी जी ने सड़क में आने वाले 80 मुसल…	NOT	NONE	hasoc_2020_hi_2317
1127492366670159872	छुटकी दीदी जरूरी नहीं कि अगर मायके से छुट्टियों में आने के लिए फोन ना आए, तो आप आने का कोई प्लान बनाएं ही ना। बोलिए कब की टिकट बनाई है अपनी?" भाभी ने फोन पर कहा। https://t.co/0pPd5E9rTT	NOT	NONE	hasoc_2020_hi_1899
1127488709224353792	@News18India @sambitswaraj @sherryontopp @BJP4India @INCIndia यह सरदार पागल हो गया है	HOF	OFFN	hasoc_2020_hi_3647
1127460754167193600	RT @NavbharatTimes: भ्रष्टाचार हो, महंगाई हो या 1984 में हजारों सिखों का कत्ल हुआ हो इनका जवाब यही होता है- 'हुआ तो हुआ'। जिस अहंकार में ये…	HOF	OFFN	hasoc_2020_hi_3598
1123505101878939651	RT @vishu_hindu: @ArvindKejriwal B S F में इस समय188 बटालियन है जिसमें केवल तेज बहादुर को खाना खराब लगा😁भैय्या फौज में सेवा करने गये थे की…	HOF	OFFN	hasoc_2020_hi_1856
1127629927237529600	RT @kalpeshjsolanki: गुजरात दलितों के लिए बना नर्क लगातार चौथे दिन घोडी चढने के मामले में दलितों पर जुल्म-अत्याचार। अभी ईस वक्त गुजरात…	HOF	HATE	hasoc_2020_hi_2809
1127532841691037697	RT @RoflNana_: सुबह का भूला अगर शाम को घर लौटकर आये तो उसे भूला नहीं कहते..🤗🤗😁😂😂 https://t.co/CiMOcgaTu6	NOT	NONE	hasoc_2020_hi_3778
1127489954928631808	बंजर नहीं हूँ मैं एेहसास नेह का बाकी है मंजर नहीं हूँ झूँठा विश्वास नेह का बाकी है याद नहीं आती तेरी ममता ये झूँठी शां बाकी है यूँ तो बिछुड़े अरसा हुआ मगर मुझमें माँ बाकी है नींद न आती थी... https://t.co/njvHumZiXS	NOT	NONE	hasoc_2020_hi_3363
1127506073638752256	RT @KapilMishra_IND: AAP ने तीन राज्यसभा बेची एक भी दलित को नहीं भेजा एकमात्र दलित मंत्री राजेन्द्र गौतम के सारे विभाग छीन लिए पार्टी की…	HOF	HATE	hasoc_2020_hi_981
1127504169433100288	RT @AnilMis93178388: @yadavdimples @RahulGandhi मतलब विपक्ष के नेता 5 साल से नहाए भी नही है, एक ही ड्रेस पहने घूम रहे है	NOT	NONE	hasoc_2020_hi_2715
1127644942837243904	RT @Mohamma58796854: @I_am_Anil_Tyagi @MaheshP13388352 टाइम मैगज़ीन के विरोध में भक्तो की इतनी सुलगी हुई हे की कोई अगर टाइम भी पूछता हे…	NOT	NONE	hasoc_2020_hi_2420
1127815361619996672	RT @Anand_1226: कुछ दर्द ऐसे होते हैं, जिन्हें सिर्फ सह सकते हैं... किसी से कह नहीं सकते..!! #dil_ki_bat	NOT	NONE	hasoc_2020_hi_1950
1127519629608308736	केजरीवाल के खिलाफ, नरेंद्र मोदीजी को वोट	NOT	NONE	hasoc_2020_hi_23
1127517029169283073	इस बार सोनिया जामा मस्जिद नहीं गई न कोई पार्टी वाले इफ्तार पार्टी दे रहे है हिन्दू जागा, शैतान भागा #VotingRound6 #loksabhaelections2019 #AbkiBaarKiskiSarkar #DelhiVotes #Ramzan	HOF	PRFN	hasoc_2020_hi_3997
1127513858279477248	RT @tanisharma77: दोस्तों इंसानियत के नाते इतना रिट्वीट दें कि कल शाम तक हरेक न्यूज़ चैनल में आना चाहिए। कोई भी न्यूज़ चैनल ये वीडियो नही…	NOT	NONE	hasoc_2020_hi_3813
1123527277176872960	ओला-फ्लिपकार्ट आने वाला है भारत में जानिए इसके बारे में https://t.co/qoKo3Md0n6 https://t.co/qnmSMau44O	NOT	NONE	hasoc_2020_hi_2974
1127577414563852289	RT @JavedAlamPES6: अब अगर एयर स्ट्राइक करनी हुई तो #बारिश के चार महीनों में ही हो सकती है ताकि जहाज़ #बादलों में छुप कर जा सकें !! अब सी…	NOT	NONE	hasoc_2020_hi_1893
1123641672598867968	RT @nstomar: आपके और देश के विश्वास ने महामिलावट करने वालों की नींद उड़ा दी है। अब जनता ने इनके सारे सपनों को चूर-चूर कर दिया है | - प्रधान…	NOT	NONE	hasoc_2020_hi_2667
1123543207126528000	RT @akhileshsharma1: चुनाव जीतने के लिए ख़ैरात बाँटने के वादे करना आसान है मगर पूरा करने में दम निकल जाता है। छत्तीसगढ़ सरकार 10400 करोड़ ₹…	NOT	NONE	hasoc_2020_hi_1545
1127717768537739264	RT @Amitjanhit: समझ में नहीं आ रहा कि देश में चुनाव हो ही क्यों रहा है.... सभी संस्थाएं, सारी एजेंसियां तो मोदी जी के पास है ही, वह अपने आ…	NOT	NONE	hasoc_2020_hi_3319
1127578496690089984	@ANI प्रियंका भी कह रही है 23मई bjp गई तो क्या वो भी bjp के फिर सत्ता में लौटने पर विजय चौक पर फाँसी लगा लेगी	HOF	OFFN	hasoc_2020_hi_4280
1127570888222580737	नोटबन्दी के बारे में भी बोलो कैसे सुझाऊ आया	NOT	NONE	hasoc_2020_hi_1646
1127596829997195264	@BaghiKumar अन्य पत्रकारों को भक्त कहने वाले महान पत्रकार ने राहुल से नेशनल हेरल्ड पर एक भी सवाल नहीं किया । इससे बड़ा सबूत और क्या चाहिए की यह इस ख़ानदान का ही चमचा है	HOF	HATE	hasoc_2020_hi_2390
1123608655071367168	RT @JBMIS: प्रियंका गांधी दूसरे मासूम बच्चों से कहलवा रही है ""चौकीदार चोर है"" किन्तु अपने बच्चों को कब बताएगी कि "तुम्हारा बाप चोर है"	HOF	OFFN	hasoc_2020_hi_197
1123617647655100418	भारत के लिए बड़ी कूटनीतिक जीत. मसूद अज़हर को UNSC ने अन्तर्राष्ट्रीय आतंकवादी घोषित किया.	NOT	NONE	hasoc_2020_hi_188
1127505096365838336	RT @Jiten384444: गर्मीयो में चुनाव एसे जी नहि होते उसका कारण आज पता लगा मुझे 😂 https://t.co/sn6sgtjFlY	NOT	NONE	hasoc_2020_hi_513
1127812186506551296	@TimesNow @sambitswaraj ये पालतू कुत्ता @sambitswaraj झूठ बोल रहा है राहुल गांधी ने ऐसा कोई ट्वीट नहीं किया। या तो साबित करे नहीं तो पात्रा दो बाप का। @Fekoslovakian @ModiLeDubega @Nehr_who	HOF	HATE	hasoc_2020_hi_2772
1123556981212475393	@Velvetyvirgo ऐसा तो नही लगता	NOT	NONE	hasoc_2020_hi_3863
1127593520666107905	RT @JRathi3: #Allah_Kabir गंगा काठे घर करे,पिवे निर्मल नीर। मुक्ति नहीं हरि नाम बिन,ये कह रहे साहेब कबीर।। असली साधु वह होते है जो शास्त्…	NOT	NONE	hasoc_2020_hi_1056
1127531658880544768	@BJP4India @AmitShah कांग्रेस वंशवादी पार्टी 70 सालों से देश के संसाधनों की लूट करके अपने ऐशों आराम के लिए ही इस्तेमाल कर रही है और अपने चमचों को देश के तूकडे-तूकडे कर देश की बोटि या खिला रही है। जब कोई देश के लिए जी-जान लगाने की बात करता है, तो कुछ भ्रष्टाचारी, लोभी लोमड़ियो को डर लगने लगता है।	HOF	HATE	hasoc_2020_hi_2290
1127624453658107904	@MonaAmbegaonkar @sanjukta @RahulGandhi नया नारा "आखरी साल केजरीवाल" 😊 😂😂 #केजरीवाल 🤦‍♂	HOF	OFFN	hasoc_2020_hi_2416
1127576038840471552	@DrKumarVishwas आप आस्तीन के सांप हो। कुर्सी मिली नही तो बागी हो गए। शम॔ करो अवसरबादी। आप अलग पार्टी क्यों नही बना लेते? पार्टी का नाम बाप।	HOF	OFFN	hasoc_2020_hi_1812
1127643151861190656	RT @imbhojpuria: नरेंदर मोदी मैदान में फुहर गीतन के सम्मान में	NOT	NONE	hasoc_2020_hi_227
1123641689397026816	RT @BJP4India: केजरीवाल ने कसम खाई थी की शीला दीक्षित के समय में जितना भ्रष्टाचार हुआ हम उनको जेल भेजेंगे। केजरीवाल जी क्या हुआ, कितने केस…	NOT	NONE	hasoc_2020_hi_1732
1123529214920089600	RT @Tiya_loveme: कभी नहीं टूटता वो रिश्ता.. जहां निभाने की चाहत दोनो तरफ़ से हो. #thoughts	NOT	NONE	hasoc_2020_hi_1167
1123611767249129472	RT @Sunilsh32640883: @RahulGandhi मोदी जी को धमाका को ही चुनावी मुद्दा बनाते हैं पुलवामा पर वोट मांग चुके हैं अब गढ़चिरोली धमाका पर वोट मां…	NOT	NONE	hasoc_2020_hi_3622
1123641945232855040	RT @Ambedkarcarvan: धो लेते हैं हैंडपम्प चला कर मज़दूर कभी टोंटी नहीं चुराते ! https://t.co/ipA6Xh3WIE	NOT	NONE	hasoc_2020_hi_83
1127531214313857026	भगवान श्रीरामचन्द्र जी कहते हैं- जननी जन्मभूमिश्च स्वर्गादपि गरीयसी। अर्थात् माता तथा मातृभूमि की गरिमा स्वर्ग से भी बड़ी है। मातृशक्ति की महिमा अपार है। #HappyMothersDay	NOT	NONE	hasoc_2020_hi_2623
1123492120495624193	RT @shayarixdotcom: @BhargavaNikumbh @vinodkapri किसी लड़की से जाकर कहना कि “तुम्हारा रेप होना चाहिए” ये आप को सही लगता है.. इसका विरोध कर…	NOT	NONE	hasoc_2020_hi_3633
1123620311008546817	RT @BJP4Rajasthan: "मसूद अजहर को संयुक्त राष्ट्र द्वारा आतंकवादी घोषित करने पर आखिरकार विश्व में सहमति बनी यह संतोष का विषय है। देर आये दु…	NOT	NONE	hasoc_2020_hi_1346
1127501992593711104	RT @Amitjanhit: @ArvindKejriwal यह पहली बार वोट देने जा रही है और इसे लगता है कि केंद्र में बदलाव जरूरी है.. दिल्ली के युवा जो पहली बार…	HOF	OFFN	hasoc_2020_hi_2742
1127523064747634688	जो देश हित की बात करेगा वहीं दिल्ली पर राज करेगा	NOT	NONE	hasoc_2020_hi_3154
1123526257965060096	@krishnanandt65 @AmitShah @Cawnporiah_ @shivkmishr @BJP4India @RangnathINDIA अगले ने साफ़ साफ़ कहा कि अगर एक भी बिंद को मारोगे तो...मुझे तो लग रहा जैसे ये अपने बिंद समाज का चु*या काट रहा उस भाषण में वैसे कुछ तथाकथित ब्राह्मण समाज के ठेकेदार ब्राह्मणों का काटना चाह रहे। और जिताएं किस ब्राह्मण को जिसकी पार्टी के कट्टर समर्थक भगवान को खुले आम गाली देते है???	HOF	PRFN	hasoc_2020_hi_1539
1127464742979657728	@BBCHindi आज मोदी ने कोंग्रेस नेताओ के बयानो को ले कर रो रो कर वोट मांग रहा हैं। तो भाईओ बेहनो मोदी को ही वोट करना । नही तो मोदी रो रो कर मर जायेंगा। रंगीलाबाज, नैटंकीबाज, जुठे भाषणबाज माहीर, चोर चोकीदारबाज मोदी को ही वोट करना वनाँ मोदी रो रो कर मर जायेंगा। में मोदी वोट लुटबाज के साथ हुं।	HOF	OFFN	hasoc_2020_hi_1212
1127637393106882560	@DrKumarVishwas वध तो एकबार फिर झांसी के धोखे बाज़ दुल्हाजू' का होना है कुपोषित केकड़े देखते रहना। केजरी फिर एक बार सही साबित होगा और तू अमेठी की तरह फिर सुजा कर जाएगा भांड।	HOF	PRFN	hasoc_2020_hi_938
1123557526476402688	RT @Sonam_Mumbaikar: तेरे इश्क़ में हद से गुजर जाऊं मैं झूठ कहूं तो, मर जाऊं...😍 @Sonam_Mumbaikar	NOT	NONE	hasoc_2020_hi_3158
1123793628068044801	RT @DrShakirjalgaon: @CPJ_Official नबी(स०अ०व०) ने फरमाया... मज़दूर की मज़दूरी उसका पसीना सूखने से पहले अदा करो...	NOT	NONE	hasoc_2020_hi_2493
1123630738077732864	RT @kirantikari0: #Thank_you_nehru सुना है कल भटकते भटकते चचा की आत्मा चाइना पहुंच गयी और जमकर गरियाया तब जाकर कहीं चाइना को आत्मबोध हुआ औ…	NOT	NONE	hasoc_2020_hi_2804
1127522137835618304	@Jitendr14272284 अबे सूअर जब गद्दार मेवानी और टुकड़े गैंग के साथ तुम क्या गा.. मरवा रहे थे	HOF	PRFN	hasoc_2020_hi_2495
1127515666003546112	सब कुछ मिल जाए तो तमन्ना किसकी करोगे 🥀 अधूरी ख्वाहिशें ही तो जीने का मज़ा देती हैं	NOT	NONE	hasoc_2020_hi_2901
1127588474947641349	RT @nadeemNBT: सुल्तानपुर को लेकर कहा जा रहा है कि वहां एक जाति विशेष के लोगों ने यह कहते हुए वोटिंग की कि अच्छा अब हमसे जूते का फीता खुल…	NOT	NONE	hasoc_2020_hi_3416
1123601315039301635	RT @iam_manojgoenka: पाक मे क्या चल रहा है @TajinderBagga की t shirt का खौफ चल रहा है 😂😂 https://t.co/h0AfsdhmXy	NOT	NONE	hasoc_2020_hi_48
1127532871038541824	RT @gchordia57: हिन्दुस्तान का ग़रीब पिछड़ा वो हैं जिसके पास रहने को घर नहीं चलने के लिए कार नहीं पहनें के लिए गहने नहीं वो चाहे हिन्दू मु…	NOT	NONE	hasoc_2020_hi_3848
1127475320993402882	RT @guptaravinder71: सुनो जरा वेस्ट दिल्ली लोकसभा की टिकट 6 करोड में @ArvindKejriwal ने बेची ऎसा मेरा नही @AamAadmiParty के उम्मीदवार बल…	NOT	NONE	hasoc_2020_hi_236
1127809334405001217	RT @Sonameverma: अर्ज किया है... पप्पू अकेले ही चला था,दिमाग की दही जमाने.. चमचे मिलते गए और रायता फैलता गया..!😜😂 #SV	HOF	OFFN	hasoc_2020_hi_567
1127462738093993985	RT @aqilkhan236: फना कर दो अपनी सारी जिन्दगी अपनी माँ के कदमो में दोस्तों, दुनिया में यही एक मोहब्बत है जिस में बेवफाई नही मिलती।😘😘😘 #Mothe…	NOT	NONE	hasoc_2020_hi_1328
1127797917488746497	RT @Monika84686419: पता नहीं मुझे क्यू ऐसा लग रहा है 🙄 यहां पर मेरे बारे में मेरे पीठ पीछे बातें करते हैं पर यह भी सोच रही हूं 🤔🤔 . . . .…	NOT	NONE	hasoc_2020_hi_3661
1127792997599334400	देश की जनता किसी को नहीं बख्शेगी जो गलती करेगा उसको सुनना और सहना भी बढ़ेगा	NOT	NONE	hasoc_2020_hi_2672
1127594552469016576	RT @GaonConnection: "मेरी बेटी बचपन से ही चल फिर नहीं सकती।धीरे-धीरे जब वह बड़ी होने लगी तब उसे कंधे पर उठा कर खेतों में ले जाना मेरे लिए…	NOT	NONE	hasoc_2020_hi_972
1127611296126459904	RT @rjdevenderkumar: यह पहली बार वोट देने जा रही है और इन्हें लगता है कि केंद्र में बदलाव जरूरी है.. दिल्ली के युवा जो पहली बार वोट दे र…	NOT	NONE	hasoc_2020_hi_307
1127612407612788736	RT @uN5hUMittal: @Meenakshi7771 बताओ चमचो को कोई और काम ही नही है। मोदी जी के कपड़े गिनने के सिवा। । लगे रहो ऐसे ही।।	HOF	HATE	hasoc_2020_hi_2792
1123478098966720512	RT @1995KUMARVIJAY: आतंकी मसूद अज़हर के दिन अब लद ही गए। ग्लोबल आतंकी घोषित करने के प्रस्ताव को लेकर चीन ने अड़ंगा डालने वाला रुख़ बदला। क…	NOT	NONE	hasoc_2020_hi_3278
1127521047282999296	@rakeshupbjp @SheilaDikshit @ArvindKejriwal जी भईया	NOT	NONE	hasoc_2020_hi_345
1127556086536523776	RT @being_mitthi_: ये दुनिया मेरे जज्बात कहां समझ पायी एक तू है जो बिन कहे मेरी खामोशी पहचान पायी बिखरी मोती कि तरह जब जब गले लगा कर समेटा…	NOT	NONE	hasoc_2020_hi_3994
1123648731629244416	RT @unpacking_memo: ना जाने कब तक चलेगा ये जुदाई का दौर ऐ खुदा ज़रा ये तो बता मेरी खता क्या थी।!	NOT	NONE	hasoc_2020_hi_1453
1127540190120013824	RT @aajtak: मायावती ने कहा है कि नरेंद्र मोदी इस घृणित कांड की आड़ में घृणित राजनीति न करें https://t.co/xnFWLDUjHu	NOT	NONE	hasoc_2020_hi_2644
1127805202998775808	RT @pakau_ji: @ajitanjum @I_Am_Narendra_ @nirahua1 गर्त का अंत नहीं आया हार देख कहाँ तक गिरेगा ये नालायक़, एक सड़कछाप ने पूरे देश को शर्मिं…	HOF	PRFN	hasoc_2020_hi_574
1123804130609332225	RT @DhananjayPraj15: @MendheNarendra @siddhpal हिंदू साधु संतों को बदनाम करने की पुरजोर साजिश चल रही है क्योंकि भारत में कई करोड़ जनता हिं…	HOF	HATE	hasoc_2020_hi_3931
1123779023488847873	कोई बताएगा फिल्मों में इस्तेमाल होने वाले तकिए (pillow) कहाँ मिलते हैं ? जिससे लड़ते लड़ते hero heroine उसके परखच्चे उड़ा देते है ? एक हमारे घर का तकिया है , आज मम्मी ने फेंकर मारा तो मैं दो मिन्ट के लिए कोमा में चली गयी थी 😂😂😂😆😆😆	NOT	NONE	hasoc_2020_hi_1005
1123635108534079488	RT @nityanandraibjp: भारत के गुनहगार आतंकी मसूद अजहर को संयुक्त राष्ट्र संघ ने अंतरराष्ट्रीय आतंकी घोषित किया है। भारत के लिहाज से यह एक ब…	NOT	NONE	hasoc_2020_hi_2041
1127533806364139521	RT @YuktaSingh: ममता बनर्जी की बौखलाहट ही उन्हे सत्ता से उखाड़ फेंकेगी? ये जनता है इसकी जुल्म सहने की सीमा पार हो चुकी है...बहुत हो गई ताना…	HOF	OFFN	hasoc_2020_hi_2835
1127617696663621632	RT @ManeeshMAgarwal: @kapsology इस 'आस्तीन के सांप' ने ट्वीट डिलीट कर दिया?	HOF	OFFN	hasoc_2020_hi_2273
1127620221601177600	RT @ajitakki: @bhak_sala @Aeykaash ये इसका कुढ़ है जो इसके दिमाग से कभी खतम नही होगा। कैसे कोई इतनी नफ़रत कर सकता है। इसके मन में तो सिर्फ…	NOT	NONE	hasoc_2020_hi_1450
1123503231227707392	RT @_radha__: लापता हूँ कब से मैं अपनी ही दुनियां से किसे कहूँ की पहुँचा दे मुझे मेरी दुनियां में सभी है गुमशुदा यहाँ सभी है लापता आसां है…	NOT	NONE	hasoc_2020_hi_3529
1127564777125924864	RT @dear_sangeeta: प्यार का गला गोंट रही हूँ साला मरता ही नहीं	NOT	NONE	hasoc_2020_hi_3051
1127609693931692032	RT @bhaiyyajispeaks: @sengarlive हर हर महादेव।	NOT	NONE	hasoc_2020_hi_2122
1127581818562068485	RT @AB_BJP: श्री @RahulGandhi और @sherryontopp के लिए संस्कृत का एक दोहा याद आ रहा है 👇 उष्ट्राणां च विवाहेषु गीतं गायन्ति गर्दभा:। परस्प…	NOT	NONE	hasoc_2020_hi_1649
1127646322788409344	वाक़ई संविधान न होता तो आप भैंसिया लगा रहे होते	NOT	NONE	hasoc_2020_hi_1253
1127800908023123968	RT @kavmayor: केजरी को घूसा CONGress aka आतंकवादियो का टेंटुआ दबा के आयी हू हाँ, मै कमल खिला के आयी हूँ https://t.co/TKPJd6kKzQ	HOF	HATE	hasoc_2020_hi_4274
1127490638608420864	RT @SantoshDasi3: @SatlokChannel @VisheshDas11 @SaintRampalJiM जब भी इस धरती पर संकट आया है कबीर परमात्मा ने आकर बचाया है और अब हर बुराई से…	NOT	NONE	hasoc_2020_hi_2115
1127638152276004864	RT @ThePriyalSingh: हमें तो जो भी कहना या पूछना होता है सामने से कह व पूछ लेते..सराह और क्यूरियस कैट जैसे एप्प की जरूरत ही न पड़ती 😃	NOT	NONE	hasoc_2020_hi_2622
1127552739481800704	@suman9990895651 सुनो सड़क से चलते हैं दुश्मन को लगेगा बस आ रही है और रडार से भी बच जायेंगे 😂😂😂😂😂😂😂 https://t.co/BQXotYKrTn	NOT	NONE	hasoc_2020_hi_2921
1123665852761423872	RT @AbhayCh96427904: हंसी खुशी प्रेस कॉन्फ्रेंस चल रही थी अचानक बीच मे खबर मिली कि मशुद अज़हर को UN ने ग्लोबल आतंकी घोषित कर दिया 😂😂 https:…	NOT	NONE	hasoc_2020_hi_2109
1127483059488448512	RT @rahul_advo: एकरा के त टोटी जादो देखि के बौरा जइहें,दादा ई त भक्तन के भी भगत बा,मने निरहू के। फिर काहे न कहे निरहुवा टोटी बबुवा रोवा य…	NOT	NONE	hasoc_2020_hi_4224
1127541192546299904	RT @BJP4India: इन महामिलावटी लोगों द्वारा की जा रही साजिशों के बीच बीते 5 वर्ष से देश के हर वर्ग, हर क्षेत्र के विकास के लिए हमने जी जान से…	NOT	NONE	hasoc_2020_hi_1863
1123516569127022592	सवर्णो मोदी जी को देश के लिए जिता दिया गया। क्योकि देश है तो हम है। अब अपने हक़ की लड़ाई लड़नी है। कोई नही तो सुप्रीम कोर्ट है ना।	NOT	NONE	hasoc_2020_hi_3641
1127592618886455296	RT @indiantweeter: कांग्रेस की हवा चल रही है ज़ोर से 😂😂😂 https://t.co/gxDFiLYfxJ	NOT	NONE	hasoc_2020_hi_167
1127537413490798593	RT @Jiten384444: राष्ट्र के लिए एक वोट डाल कर आया हु 🙏 https://t.co/NjC1KWMl9X	NOT	NONE	hasoc_2020_hi_3947
1123597988935266304	@sardanarohit गढ़चिरौली के शहीदों की शहादत पर आपका खून क्यों नही खोल रहा!!! आपकी आतंकवाद के प्रति लड़ाई फ़र्ज़ी है कोई DP ब्लैक नही, कोई मोमबत्ती गैंग नही सड़कों पर कोई नारेबाजी जुलूस नही क्यों???? आखिर क्यों???? कुछ मिस है, फील नही आ रहा, क्या मिसिंग है वो????????	HOF	HATE	hasoc_2020_hi_306
1127476528944541697	RT @Suhana_Speaks: सनी देओल चुनाव प्रचार में हैंडपंप लेकर घूम रहा है, क्योंकि वो इसने उखाड़ा था.। और शकीना के चक्कर मे पाकिस्तान ज़िंदाबाद…	NOT	NONE	hasoc_2020_hi_3938
1127606569149952003	https://t.co/2L9TfHl2f5 Inko हमारे देश मे दोगले लोग सेक्युलर कहते है..... या to ye दोगले लोग अंधे है या तैमूर के नाज़ायज़ औलाद है जिनका naam हिन्दू है... और मौका पाते ही खतना कराने को तैयार है https://t.co/2L9TfHl2f5	HOF	HATE	hasoc_2020_hi_3656
1127478777099870208	@UpendraRLSP अरे धृतराष्ट्र गोली मारने वालों का समर्थन करते हों और और गाली नीतीश को देते हो, तुम जैसे लोगों के कारण ही बिहार बदनाम है।	NOT	NONE	hasoc_2020_hi_3901
1127499350173556737	@AmarUjalaNews @ghulamnazad @narendramodi @BJP4India @INCIndia अरे भोंसड़ी के पाकिस्तानी तेरे से तो बढ़िया है बे हारम के बीज सुअर का जना तु और सारे कॉंग्रसी साला हर सेकेंड अपनी नस्ल बदलते हो दोगले साला देशद्रोही	HOF	PRFN	hasoc_2020_hi_1974
1123483064997433344	@aajtak राहुल के जन्म के लिए, हास्पिटल का सबूत दिखाकर किसे गुमराह कर रहे हो चमचों? मुद्दा तो यह है कि ब्रिटेन में दाखिल रिटर्न्स में उसने अपनी नागरिकता भारतीय क्यों नहीं लिखी? @RanjanGogoiCJI @rashtrapatibhvn @ECISVEEP @rajnathsingh @AmitShah @PMOIndia @SushmaSwaraj @arunjaitley	NOT	NONE	hasoc_2020_hi_1489
1127743932597596160	@ansarraza16 चचा तुम्हारी यह अंगुली फेल हो गयी	NOT	NONE	hasoc_2020_hi_17
1127791340815708160	RT @Npsanu: कर्मों से डरिये ईश्वर से नहीं... ईश्वर माफ कर देता हैं कर्म नहीं । अटल सत्य है कि जैसे बछड़ा सौ गायों में अपनी मां को ढूंढ ले…	NOT	NONE	hasoc_2020_hi_431
1123682961356984323	RT @AacharyaSahiiL: नंवबर 2018 में अमेरिका ने देशों को 6 माह का अल्टीमेटम दिया था वह ईरान से तेल आयात को जीरो करे हालांकि भारत समेत 8 देशों…	NOT	NONE	hasoc_2020_hi_1358
1123595476559753216	कोई पत्थर से न मारो दिवाने पप्पू को, मंदबुद्धि है बेचारा, नहीं जानता देश राजनीती को सुप्रीम कोर्ट पहले ही पीट रहा	HOF	OFFN	hasoc_2020_hi_978
1127495596246364160	RT @Prakash12Joshi: राष्ट्र हित में मेरा वोट @GautamGambhir जी को। @RahulGandhi के 72000 की जरूयत नही किसी भी राष्ट्र प्रेमी को। मोदी जी…	NOT	NONE	hasoc_2020_hi_4406
1127802304734777344	गर्मी में हमेशा सिर ढककर बाहर निकलें व धानी और सतु का प्रयोग करें बहुत लाभदायक है। #SummerHealthTipsByBapuji https://t.co/quVPaN8r0M	NOT	NONE	hasoc_2020_hi_1272
1123524282447826946	RT @PRAN_JAL_80: #DeshModiKeSaath #AvengersEndame #वेद_मेरा_भेद_है कबीर परमात्मा कवियों की भूमिका करके अपना तत्वज्ञान प्रदान करता है उसकी…	NOT	NONE	hasoc_2020_hi_3071
1127519025628577792	RT @IPSinghSp: यूपी सरकार में माल बनाने में no-1 मंत्री है मौर्या जी इनका ध्यान सिर्फ पैसे और उड़न खटोला पर रहता है।भाजपा को इन लोगों ने क…	HOF	OFFN	hasoc_2020_hi_1993
1127614727071232001	RT @RJDforIndia: वह शक़्स जो हर बिहारी की जान है पर जिनसे हर विरोधी हैरान, परेशान, हलकान है ऐसे जननेता तेजस्वी यादव जी का कल, 13.05.2019 का…	NOT	NONE	hasoc_2020_hi_2630
1123801861474201606	@vinodkapri बहुत सही जवाब दिया है आपने, जहाँ चौकीदार लिखा देखो वहां बहस ही ना करो	NOT	NONE	hasoc_2020_hi_661
1127569898366881793	RT @TV9Bharatvarsh: Video: जब लंबी-लंबी फेंकने लगे निरहुआ, दंग रह गए जर्नलिस्‍ट्स. #AzamGarh #Nirahua #LokSabhaElections2019 https://t.co/8…	NOT	NONE	hasoc_2020_hi_660
1127593348708032512	RT @BharatAbhyuthan: दिग्विजय सिंह ने वोट माँगने के लालच में आज अपना वोट नहीं डाला। ये है इनकी राष्ट्रभक्ति #VotingRound6	HOF	OFFN	hasoc_2020_hi_3231
1127609974924955652	OMG: इस तकनीक की मदद से अब दीवारें बनानी, केवल फिट करनी होंगी https://t.co/TwviV3CbV8 Top News	NOT	NONE	hasoc_2020_hi_2868
1127551376324562944	RT @SourabhBhatt15: फिलींग आ रही है इसबार दिल्ली में कुछ गजब हो रहा है 😍	NOT	NONE	hasoc_2020_hi_4020
1127689230497411072	जुबां पे बात है लेकिन सुनाना ही नहीं आता। हमें तुमसे मोहब्बत है जताना भी नहीं आता।	NOT	NONE	hasoc_2020_hi_2054
1123657581598105600	RT @INCIndia: ये दुःखद है कि मोदी जी राष्ट्रीय सुरक्षा के मामले में शहीदों के नाम पर वोट मांगने के अलावा कुछ नहीं कर रहे। ये देश लगातार शहा…	NOT	NONE	hasoc_2020_hi_2064
1127574440781303810	RT @SabeenaTamang: जो इंसान एक समर्थक को सरेआम थप्पड़ मारकर अपमानित कर सकता है, अपने बेकाबू गुस्से का शिकार बनाकर सियासत को बेइज्जत कर सकता…	NOT	NONE	hasoc_2020_hi_736
1123618113197563904	RT @BJP4Gujarat: जब पंडित नेहरू प्रधानमंत्री थे तो वो एक बार कुंभ मेले में आये थे। तब अव्यवस्था के कारण कुंभ में भगदड़ मच गई थी, हजारों लो…	NOT	NONE	hasoc_2020_hi_3875
1127489040566165504	RT @RameshC76078903: @paglu_nehu ट्वीटर न तो कोई मैट्रीमोनियल वेबसाइट है और न ही exclusively सींगलों की । एक सोसल मेडिया है जहां हर कोई अरे…	HOF	OFFN	hasoc_2020_hi_4142
1127478546425839616	RT @sunil_salun: @sanjayeindoria ये हरामी तो तवायफ से भी गया गुजरा है.. पप्पू मुत्र पीनेवाला...	HOF	PRFN	hasoc_2020_hi_3186
1127578169547030533	थोड़ा साइड देना भी! BJP जा रही हैं! #EntireCloudCover https://t.co/31RsSnyTZg	NOT	NONE	hasoc_2020_hi_3310
1127806725522849794	RT @SeemaIn10347627: #SpiritualSundayAtDSS @DeraSachaSauda इंसान जब सत्संग में आता है तो उसके बुरे कर्म ख़त्म होते चले जाते हैं और नेक व भ…	NOT	NONE	hasoc_2020_hi_2978
1127551820895621121	@ANI मैं क्या बोलता हूं चाचा, रावलपिंडी में रजिस्टर करेगा तो तीसरा निकाह भी हो जाएगा, साथ में थरूर जी को भी लेकर जाएगा तो बहुत पुण्य मिलेगा	NOT	NONE	hasoc_2020_hi_4247
1127594745411149824	ईतना सन्नाटा कयों है भाई ? क्या सब लिबरल मर गये ?	HOF	OFFN	hasoc_2020_hi_3458
1127578253424676864	RT @OfficialAaKu: वायुसेना ने बोला, "नहीँ, मौसम ठीक नहीं है" तो मैंने सोचा बादल है तो हम पाकिस्तानी राडार से बच सकते है" फिर मैंने सोचा,…	NOT	NONE	hasoc_2020_hi_1266
1123474621867671554	RT @mitalishah121: एक बाबरी ढाचा टूटी थी मुसलमान आज तक भाजपा को वोट नहीं देता। लाखों मंदिर कांग्रेस ने तुड़वाए फिर भी हिंदू समझते नहीं।।	HOF	HATE	hasoc_2020_hi_280
1123753996093743105	RT @vinodsharma1834: अब.. #मसूद_अजहर को दुनिया के किसी देश में एंट्री नहीं.. दुनिया का कोई देश मसूद को हथियार या बम-बारूद नहीं बेच सकेगा..…	NOT	NONE	hasoc_2020_hi_1728
1127552932415660033	@KapilDe85606900 @AnshChodhary2 @dsanjeebkumar @ghonchu_gandhi @jaitushar @Vijay_Reetesh @shuklaji__ @badri_dk @Rao7478 mentos गधो पर काम नही करता उसका ad नही देखा आपने..	HOF	PRFN	hasoc_2020_hi_2165
1127581864728846338	@KinjalDamor Mast match hone waala hai di	NOT	NONE	hasoc_2020_hi_1524
1127811653863501824	अगर कोई आपसे कुछ मांगे तो दे दिया करो.. शुक्र करो ऊपरवाले ने आपको देने वालों में रखा है, मांगने वालों में नहीं।	NOT	NONE	hasoc_2020_hi_2160
1127521701607112704	@RabriDeviRJD चारा चोर का फोटो जेल में लगाओ अनपढ़ गंवार राबड़ी। चारा चोर है ललुआ यादव ।	HOF	OFFN	hasoc_2020_hi_4303
1123554032641921024	RT @Aanya34: जैसे जवान हुई चूत में उंगली करने में बड़ा मज़ा आया। https://t.co/klh6vBOGD0	HOF	PRFN	hasoc_2020_hi_3712
1127543910455099393	@JayaPrada4Mp हमारे संस्क्रति में हर दिन🙏 माँ का है	NOT	NONE	hasoc_2020_hi_1026
1123488349820473344	RT @SureshChavhanke: ईसाई, श्रीलंका हमले को विश्व भर में दिखा कर बदला लेने का माहोल बना रहे हैं। यहाँ तक कि बरेली जैसे शहर में भी इसके सबूत…	NOT	NONE	hasoc_2020_hi_2506
1127540160764100608	क्यूँकि हर वोट है ज़रूरी #DelhiVotes #BattleOf2019 मताधिकार का प्रयोग करें... @DDNewsLive https://t.co/dCJfQx3EH2	NOT	NONE	hasoc_2020_hi_509
1127611531020066817	@ArshiArshi12 Shukar hai! 😊	NOT	NONE	hasoc_2020_hi_2384
1127551858669699072	@jayantrld नागपुर से जारी Whatsapp msg , भक्तों की दलील और जिल्लेइलाही के भाषण या साक्षात्कार तीनों में लेशमात्र भी फ़र्क़ नजर नही आता 😀😀	HOF	HATE	hasoc_2020_hi_1485
1127609685517848576	RT @amarujalakavya: एक दुनिया है जो समझाने से भी नहीं समझती, एक माँ थी बिन बोले सब समझ जाती थी - अज्ञात #MothersDay2019 https://t.co/RGOKk…	NOT	NONE	hasoc_2020_hi_2579
1127599250110590977	bjp ने बिहार मे भी को र्ट का सहारा लेकर 3.5 लाख लोगों जीवन up के शिक्षा मित्रों की तरह कर दिया बर्बाद । https://t.co/RoLEBnnUvH	NOT	NONE	hasoc_2020_hi_336
1127508632151572481	RT @INCIndia: न्याय योजना से गरीबों और अर्थव्यवस्था दोनों को मदद मिलेगी। यह हमारी अर्थव्यवस्था को गति देगी और लोगों की क्रय शक्ति बढ़ाएगी।…	NOT	NONE	hasoc_2020_hi_1081
1123566909138591745	@ZeeNewsHindi मीडिया इसे high light न करें। पता नही कितने लोग नामांकन कर रहे है नामांकन रद्द भी नही होता तो कौन सा तीर मारता ।	NOT	NONE	hasoc_2020_hi_3596
1127792599136210944	@IshikaSiingh प्यार अपने धर्म मे करौ तौ अच्छा हॊता हैं	HOF	HATE	hasoc_2020_hi_4381
1127762974741938177	संत डॉ. @Gurmeetramrahim सिंह जी इन्सा किसानों को कृषि अपशिष्टों को जलाने के बजाय पशुओं के चारे के रूप में उपयोग करने के लिए प्रोत्साहित कर रहे है और वे बड़ी संख्या में ऐसा कर रहे हैं। #SayNoToStubbleBurning @derasachasauda @Gurmeetramrahim @preeti_teacherhttps://t.co/bsuWsgbnoD	NOT	NONE	hasoc_2020_hi_3686
1127813373511397376	@BJP4UP जैसे काला धन लेकर आये जैसे 15 लाख दिये जैसे अच्छे दिन लाये जैसे महंगाई कम की जैसे आतंकवाद रोका जैसे विजय माल्या लाये जैसे राम मंदिर बनाया जैसे 370 हटाया जैसे महिला सुरक्षा की? जैसे गंगा सफाई की? जैसे किसानों को msp दिया जैसे युवाओं को नौकरी दी? तुमसे न हो पायेगा अब होगा #NYAY	NOT	NONE	hasoc_2020_hi_370
1123611200984633344	@narendramodi वो बहुत पहले से ऐसा वातावरण तैयार करने में लगे थे।उन्होंने वर्षों से शिक्षा संस्थानों,रंगमंच, और मीडिया में ऐसे लोगों का निर्माण किया है जिन्हें आतंकी और उनकी विचारधारा में कुछ भी गलत नही लगता। बदले में मिलने वाला पैसा उन्हें ना सिर्फ विलासिता उपलब्ध कराता रहा है।	NOT	NONE	hasoc_2020_hi_1239
1127563292317241344	RT @AagayiNavya: वाह संघी मच्छर वाह... संघियों की बची हुई चाय में से दूध निकाल कर पेडिग्री के साथ खाने वाला भाजपा का पालतू Pइल्लॉ सिन्हा भी…	HOF	HATE	hasoc_2020_hi_2091
1127697187100475397	RT @RakeshT73827202: राहुल गांधी ने तो खुलकर अपनी पसंद बता दी।😜 अब BMW को भी स्पष्ट कर देना चाहिए कि हकीकत क्या है?😂 यह एकतरफा प्यार है या…	HOF	OFFN	hasoc_2020_hi_1834
1127520296502620160	RT @RajeevDixit00: @aajtak राहुल गांधी को देख कर बहुत दुख हुआ बेचारा हताश निराश बीमार सा अधेड़ जो अपने गम में जल्दी ही आत्महत्या करने वाला…	HOF	OFFN	hasoc_2020_hi_2095
1127785863088205824	RT @nirmal60649335: @SanskarOfficial @AvdheshanandG पुज्य बापूजी बताते हैं- हृदय रोगियों के लिए उबली लौकी में धनिया, जीरा, हल्दी और हरा ध…	NOT	NONE	hasoc_2020_hi_2057
1127584469358075910	@Shivaay__ युवराज का तो आज शायद खत़्म हीं हो गया सफर..मैं अब क्रिकेट इसलिए भी ज्यादा नहीं देखता	NOT	NONE	hasoc_2020_hi_1738
1127523324790099968	RT @SirChahal: ब्रेकिंग न्यूज : केजरीवाल ने भी डाला वोट 😹 https://t.co/QSzzjO3ZdX	NOT	NONE	hasoc_2020_hi_3017
1123655576733360128	RT @AakankshaCharu: बरखा दत्त के शौहर और प्रशांत भूषण के भाई को "ग्लोबल आतंकी" घोषित करने की मैं कड़ी निंदा करती हूँ!😁 #MasoodAzhar	HOF	OFFN	hasoc_2020_hi_1168
1127615662422220800	RT @Suhana_Speaks: माननीय मुख्यमंत्री श्री @ArvindKejriwal जी आप ने दिल्ली को इतना साफ सुथरा कर दिया है, कि अब दिल्ली वालों को झाडू की ज़रू…	NOT	NONE	hasoc_2020_hi_2154
1123780470536318978	न्यायलय ने तो सबूतों को दरकिनारा करते हुए एक हिन्दू संत को आजीवन कारावास दे दिया,न्यायालय ने तो पैसा फेंक तमाशा देख कहावत को सिद्ध करके दिखाया है तभी तो चोर लुटेरे हत्यारे, आसानी से रिहा हो जाते है ,न्यायलय भी ऐसे अधर्मीयों को रिहा करके गर्व महसूस करते है। #IndianJudiciaryAtStake	HOF	OFFN	hasoc_2020_hi_636
1127463719548616704	RT @eventssanjay007: @balendra690 @narendramodi चमचों का क्या है जहां बोझा ( पैसा ) वही के हो जा। https://t.co/lpXCyL9hif देश हित के लिए…	HOF	OFFN	hasoc_2020_hi_646
1127466378745733120	RT @PiyushGoyal: अखिलेश यादव जी ने सहारनपुर में 70 सीटों से शुरू किया था, उन्होंने कहा था हम 70 सीट जीतेंगे। आज डुमरियागंज आते आते 30 रह गए…	HOF	OFFN	hasoc_2020_hi_976
1127779378660818944	Ni manijaa	NOT	NONE	hasoc_2020_hi_1329
1127563967621058560	RT @barotchetan99: सिद्दू उस हिजड़े कि तरह है जो बिना बात के ताली ठोकता रहता है 😅😀😆😉	HOF	OFFN	hasoc_2020_hi_2450
1127498846844538881	RT @chitraa_me: मोदी पाकिस्तान को ठोकने के बाद भी कायर हैं.... और अपने देश के हजारों सिखो को मरवाकर राजीव गांधी बहादुर हो गया... वाह…	HOF	OFFN	hasoc_2020_hi_968
1127594309216161797	@AunindyoC Whatsapp forward creativity! वायु सेना: मोदी जी बादल हैं, दिक्कत हो जाएगी... मोदी जी: चिंता मत करो बादल (Akali) हमारे साथ हैं, आगे चलो!! https://t.co/Il9QGIFRI1	NOT	NONE	hasoc_2020_hi_341
1127617130432585728	RT @Mere_Ahsas: कहां कहां से टूटा है जाने मेरा दिल जुड़ता ही नहीं कितना भी जोड़ लूं #माही	NOT	NONE	hasoc_2020_hi_566
1127788144776978432	अखिलेश यादव जी सपा अव पशताये होत कया जव चिडिया चुग गयी खेत अव जनता आपको कभी मौका नहीं देना चाहती कयो कि सरकार मे रह कर केवल अपने परिवार का ही भला किया। अगर जनता का भला किया होता तो आज सरकार मे होते।	NOT	NONE	hasoc_2020_hi_2291
1123817321682935808	@hadappababa आजाएंगे हमें छोड़ कर कहा जाएंगे 🙈	NOT	NONE	hasoc_2020_hi_1063
1123628875810951170	@jigneshmevani80 @AtishiAAP कौन आतिशी ... ? गौतम गंभीर गल्ली क्रिकेट नही खेलता भाई । कोई "international" खिलाडी लाओ झाडू वालो ... खैर आप मे से किसीं की भी औकात नही जो गौतम के सामने भी खडे रहे । debate तो दूर की बात है @GautamGambhir	HOF	OFFN	hasoc_2020_hi_984
1127559504860606465	मेरे पास तो अगर ऐसा कोई आता है तो एक सवाल मे पीठ दिखा कर भाग जाता है जैसे ये भाग गया..	NOT	NONE	hasoc_2020_hi_2753
1127611149350866944	RT @narendramodi_in: देश सुरक्षित नहीं होगा तो विकसित भी नहीं होगा। विकास के लिए पहली शर्त सुरक्षा होती है। मिलावटी सरकार, खिचड़ी सरकार…	NOT	NONE	hasoc_2020_hi_1441
1127499849308487680	RT @barotchetan99: पूरी दुनिया हैरान है ये जानकर भारत सब्सिडी पर सूअर पालता है.. JNU , AMU	HOF	PRFN	hasoc_2020_hi_684
1127628622804557824	@IPL हारना तो फिक्स है व्हाट्सन तू गांड दिया समझ	HOF	PRFN	hasoc_2020_hi_1517
1127753243965120512	@AshramBlr मुहँ में छाले पड़ गये हों तो त्रिफला चूर्ण को पानी में डाल के कुल्ले करें था मिश्री चूसें । इससे छाले शांत हो जायेंगे । #SummerHealthTipsByBapuji	NOT	NONE	hasoc_2020_hi_3394
1123767988296081408	RT @myogiadityanath: संत कबीरनगर में जनसभा को संबोधित कर रहा हूँ ... https://t.co/lSiSI90Qea	NOT	NONE	hasoc_2020_hi_628
1123761847830745090	झाड़ू जब तक एक सूत्र में बँधी होती है , तब तक वह कचरा साफ़ करती है लेकिन वही झाड़ू जब बिखर जाती है तो , खुद कचरा हो जाती है इसलिए हमेशा सगंठन से बँधे रहे , बिखर कर कचरा न बने 🌺🍀🍀🌺🍀🍀🌺🍀🍀🌺 🍁🌷good morning 🌷🍁	NOT	NONE	hasoc_2020_hi_2540
1127485752252612609	This is KASHIWAMOCHI	NOT	NONE	hasoc_2020_hi_1807
1127491523593924609	@mausamii2u 1 वीडियो भी वायरल हुआ था इसका। देश को सच्चा रिपोटर चाईये। ये फिक्स करके न्यूज़ बनाने वाले नही चाईये	NOT	NONE	hasoc_2020_hi_1161
1123721947387449346	RT @BabakiJadeBoote: बिना वारंट के कोर्ट के मना करने के बाद भी वडोदरा क्राइम ब्रांच वाले भाजपा के नेताओं के कहने पर जुबेर पठान को रात के 2…	NOT	NONE	hasoc_2020_hi_148
1127583861179801600	@ZeeNewsHindi और कोई काम नहीं है इनके पास, बच्चों जैसी immature सोच है, उम्र हो गयी लेकिन समझ बच्चों की ही है.	NOT	NONE	hasoc_2020_hi_865
1123489578747404288	RT @Shakti_Shetty: Mann ke mann mein kya chhupa hai – yeh kaun jaanta hai?	NOT	NONE	hasoc_2020_hi_3180
1127493654317166592	RT @Rajivmehra27: मैंने पायलट को कहा प्यास लगे तो बादल में स्ट्रा घुसेड़ कर पानी पी लेना 🤷 लेकिन प्लेन से बाहर मत निकलना, रडार पकड़ लेगा !…	NOT	NONE	hasoc_2020_hi_3391
1123568255505854466	RT @ME____Mastani: अब नही बोलोगे "nice pic" 😂😂😂😜😜😜 https://t.co/gZhCy0MDci	NOT	NONE	hasoc_2020_hi_2592
1127777306712231937	RT @AbhaMis01036320: आज का ज्ञान अगर गर्मी 🔥🔥 लगे तो पंखा चलालेना चाहिए,☺ और ज़्यादा लगे तो कूलर😌 चलाना चाहिए, और ज्यादा लगे तो😇 मुझ…	NOT	NONE	hasoc_2020_hi_1722
1127621874156855297	RT @ajitanjum: VIDEO: अलवर गैंगरेप पीड़ित दंपति ने मांगी सरकारी नौकरी, कहा- बलात्कारियों को फांसी दो https://t.co/nTjZHDI1v3	NOT	NONE	hasoc_2020_hi_2259
1123621170866077697	@RabriDeviRJD अरे चाची इन सब मोदी ओं में कोई रिश्ता नहीं क्यों झूठ फैला रही हो	HOF	OFFN	hasoc_2020_hi_2934
1127796709533216769	ये वह घटनाएं हैं, जिन्होंने राजस्थान को शर्मसार किया। इन्हें रोका जा सकता था लेकिन महिला सम्मान का ढोंग करने वाली कांग्रेस अपनी असफलता को छिपाने के बहाने ढूंढती रही और पीड़ितों की चीखों को अनसुना कर दिया। कभी वोट के लालच में तो में अपनी नाकामियों के उजागर होने के डर से। https://t.co/IvOVt98IDC	HOF	HATE	hasoc_2020_hi_2720
1127527049348780032	RT @shantilalthak11: मजबूत भारत देखना चाहते हैं तो घर में मत बैठिए वोटिंग करने निकलिए	NOT	NONE	hasoc_2020_hi_3213
1127759409579315200	@anuragspparty @yadavakhilesh @ndtv @Mayawati @RahulGandhi ये जो बच्चा गर्मी में ये लोहा ले जा रहा है इसी चीज को हटाने भाजपा आ रही है...काश अगर सही नीति और सही नजरिये से कांग्रेस सरकार आज तक चली होती तो ना इस तरह रिक्शा चल रहे होते ना आप वीडियो बनाते...ये लड़का मेहनती है करोड़ो कमा रहे होता और आप कहीं बैठ लेबरी कर रहे होते।	NOT	NONE	hasoc_2020_hi_384
1123793980381179905	RT @kuruwila: सुनो bsdk, जीवन क्या है?जीवन एक चू*यापा है। इस जीवन से लड़ना नहीं,इसके मज़े लेना सीखो।इसको दिखाओ की bsdk असली चू*या हम लोग…	HOF	PRFN	hasoc_2020_hi_198
1127769769510354945	@muskanRai857600 सुप्रभात हर हर महादेव जय श्री राम 🙏🙏	NOT	NONE	hasoc_2020_hi_92
1123827870374166529	RT @rajbhadurckt: #वेद_मेरा_भेद_है सभी साधकों के ये विचार गलत है की सृष्टि को बनाने वाला कोई नहीं है। जबकि हमारे शास्त्र बताते हैं कि कबीर…	NOT	NONE	hasoc_2020_hi_1613
1123664212797022208	@ZeeNewsHindi ऐसे झूठे और चोर इंसानो को 48 घण्टे नही सिर्फ 48 सेकंड का वक़्त देना चाहिए वो भी अगर जरूरी हो तो	NOT	NONE	hasoc_2020_hi_4336
1127650261218893824	@rajeshnagarfbd @narendramodi @aniljaindr @BJP4India @subhashbrala @Nitin_Nagar_bjp @mlkhattar @PMOIndia नकल में भी अकल चाहिए BJP को ठुल्लू दिखाने के चक्कर मे वोट ही डाल गया चमचा ☝🏻☝🏻☝🏻🙉🙉🤫🤫 ठोको ताली ठोको ताली ठोको ताली https://t.co/FaCuKch6Zq	HOF	OFFN	hasoc_2020_hi_1465
1127506576972099584	भाजपा सरकार जाना तय, सिर्फ इधर-उधर की बातें करते हैं मोदी : प्रियंका लोकसभा चुनाव के नतीजे आने में अब बहुत ज्यादा समय नहीं बचा है। ऐसे में सभी दल अपनी ताकत झोंक रहे from https://t.co/cLcTcqdCNE News RSS Feeds https://t.co/MfhvkmvdI3 https://t.co/rJ3uoYV2Gx https://t.co/TJYjSPJvgn	NOT	NONE	hasoc_2020_hi_1862
1127608716641980416	RT @Pradeep85528335: #HappyMothersDay2019 तुम ही हो माता पिता तुम्हीं हो तुम्हीं हो बंधु सखा तुम्हीं हो यह जो लाइनें हैं यह पूर्ण परमात्मा…	NOT	NONE	hasoc_2020_hi_3101
1127525270951321607	RT @aajtak: सैम पित्रोदा ने कहा कि मेरी हिंदी खराब है, मैं 'जो हुआ वो बुरा हुआ' कहना चाहता था https://t.co/83f16KhAWC	NOT	NONE	hasoc_2020_hi_3400
1127589091493711874	RT @SoniyaGupta69: मेरे पिया, अब अपना लंड डाल दो, अब सहन नहीं हो रहा है। https://t.co/VcOLhrRxqu https://t.co/GDPANgrYTj	HOF	PRFN	hasoc_2020_hi_2738
1127674982451036160	RT @IqbalShahfahad: 🌹 रहमतो का माह-ए-रमज़ान 🌹 रसूलल्लाह ﷺ ने इरशाद फ़रमाया :- 👉 "जो किसी रोज़ेदार का रोज़ा इफ़्तार कराए तो उसको…	NOT	NONE	hasoc_2020_hi_10
1123781426833436674	RT @Priyank74750061: भारत रत्न नेहरू चाचा कि वजह से मसूद पर प्रतिबंधित लगा धन्यवाद काका ! अब लोग सोच रहे होंगे कैसे ? ठरकी चाचा न होते…	HOF	OFFN	hasoc_2020_hi_1771
1123503734552612865	नोटबन्दी और GST ने असंगठित क्षेत्र में नौकरी करने वालों को पूरी तरह से तहस नहस कर रख दिया , विशेषकर दिहाड़ी मजदूरों को जो पूरे दिन बैंकों के आगे लाइन में लगकर अपनी ईमानदारी से कमाए पैसों को बदलने के लिए मजबूर किए गए थे। GST के बाद तो उनकी नौकरीया खत्म हो गयी. #NYAYforMazdoor https://t.co/BKEmAdmFrk	NOT	NONE	hasoc_2020_hi_4236
1127790149671182336	@Priyake14885278 *निस्वार्थ भाव से लोगों के काम आते रहिये* *क्योंकि ,* *क़ुदरत का एक उसूल है की जिस कुंए से लोग पानी पीते रहते हैं वो कभी सूखता नहीं है !!* *🙏🏻 😊शुभ दिन हो😊🙏*	NOT	NONE	hasoc_2020_hi_4001
1127468496885956608	@DeemagSePaidal भाई फिर फोन कभी नहीं मिलता 😂	NOT	NONE	hasoc_2020_hi_1920
1127523895244926976	RT @HandsomAbhishek: रामचरित मानस में साफ लिखा है....... "जब जब होहिं धरम पर हानि बाढ़ाहिं असुर अधम अभिमानी तब तब प्रभु धरि मनुज शरीरा हर…	NOT	NONE	hasoc_2020_hi_1220
1127801138726596610	RT @rahulrl_: भारत मे लगभग सैंकड़ों गालियाँ दी जाती है "केजरीवाल जी" हर गाली में फिट बैठते है ! 😂😂	HOF	OFFN	hasoc_2020_hi_520
1127760365893357568	राडार वाले बयान के बाद तो भक्त भी समझ गए की मोदी महान नहीं एक नंबर का बुड़बक और झूठा हैlहम तो पहले से ही कहते थे एक मूर्ख आदमी ने देश के तमाम पढ़े लिखे लोगों को मूर्ख बना दिया हैl	HOF	OFFN	hasoc_2020_hi_1605
1127500449072893954	सभी लोग वोट देने के बाद अपनी स्याही लगी एक उंगली दिखाते है और ये नासा से आए वैज्ञानिक वोट देने के बाद अपनी चार उंगलियों दिखा रहै है 😀😀😀 #लोकसभा_चुनाव_2019 #LokSabhaElections2019 https://t.co/FWbKq89m9U	NOT	NONE	hasoc_2020_hi_4378
1127511383636041729	RT @sureshgoyal24: हा... हा... इधर सेम पित्रोदा पार्टी की छीछालेदार करवा रहा था उधर हमारे कुछ चोटि के निष्पक्ष पत्रकार इस चिन्ता में दुब…	HOF	HATE	hasoc_2020_hi_4132
1127507646494453760	@SubhashGanga009 @ZeeNewsHindi अरे हिजड़ों अगर मुसलमानों ने अल्लाह हू अकबर शुरू कर दिया तो घरों में पाखाना फिर मारोगे बाहर नहीं निकलोगे	HOF	HATE	hasoc_2020_hi_2696
1127523429685456896	RT @CongressAICC: अंदाज़ ज़ुदा हैं ! औरों से.. CP : @RahulGandhi https://t.co/NPVnv4jVkz	NOT	NONE	hasoc_2020_hi_564
1127805802792853504	RT @AgrwalRani: साड़ी पहनने की अंतिम तिथि 19 मई शाम छह बजे है। उसके बाद इधर से साड़ी डालो उधर से जीसं निकलेगी। 🤚फिर अगले चुनाव में मूर्ख…	HOF	OFFN	hasoc_2020_hi_1229
1127561836927148032	RT @RavindraGautam_: स्वर्गीय राजीव गांधी को अपमानित करने के पीछे कहीं दिल्ली और पंजाब के चुनावों में सिख वोटों को साधने की जुगत तो नहीं…	NOT	NONE	hasoc_2020_hi_4321
1127484816901988352	@narendramodi मोदी जी की असली चेहरा https://t.co/8W7hXI4Rn9	NOT	NONE	hasoc_2020_hi_4387
1123751445931667456	ड्रैगन झुका, मसूद अज़हर अंतर्राष्ट्रीय आतंकी घोषित हुआ ! संयुक्त राष्ट्र को भी EC का नोटिस तो नहीं भेजा जाएगा !	NOT	NONE	hasoc_2020_hi_287
1127471088961634304	अरे ममता दीदी का नाम तो ले लो, सिद्धार्थ @svaradarajan. इतना डर काहे का? या फिर लजा रहे हो, का?	NOT	NONE	hasoc_2020_hi_3556
1123580439984132096	मसूद अजहर तो खत्म होगा ही अब मसूद के सहारे पाकिस्तान भी गया समजो 😎 #MasoodAzhar #ModiHaiToMumkinHai जय हो 🇮🇳	NOT	NONE	hasoc_2020_hi_149
1127560201132027904	💐🙏 बिल्कुल सही बड़ो के बिन दिन कहाँ जैसे जड़ बिना पत्ते और फूल कहाँ,,,,,💐💐 https://t.co/CFKgFUPntI	NOT	NONE	hasoc_2020_hi_3980
1127774769124761601	RT @Vinod__Sharma: इस गरीब चाय वाले के पास सुख-सुविधा की सारी वस्तुएं थी, डिजिटल कैमरा भी था 🤔 क्या आपको नहीं लगता कि इस अंतरराष्ट्रीय फकीर…	NOT	NONE	hasoc_2020_hi_1636
1127782570534502401	RT @RammeharDabla: मैं यहां हूं : विकास 🤣👇👇👇👇 https://t.co/XF5L0nTQuX	NOT	NONE	hasoc_2020_hi_3943
1123476853249986560	@Kavita_Sharma4 चमचों को बांधिए, माहिर है इस काम में !! 70 सालों से ढ़ो जो यह है #चोर_गांधी परिवार को‼️🤣	HOF	OFFN	hasoc_2020_hi_3595
1127619663775453184	RT @s_marwadi786: अच्छा हुआ कांग्रेस ने 70 साल में हर गाँव में स्कुल बनाये नही तो मतदान करने मोदी जी के बनाये शौचालय में जाना पड़ता😂😂	HOF	OFFN	hasoc_2020_hi_3535
1127479443998400512	RT @kanchanad123: #SaturdayMotivation जब कबीर साहेब कलयुग के प्रथम चरण में आए थे तो उनकी सामर्थ्य देखने के लिए सेख तकी ने कबीर साहेब को गर्…	NOT	NONE	hasoc_2020_hi_2620
1127576802187079682	RT @renu_18: पत्रकार~ इस बार काँग्रेस की कितनी सीट आएगी ??? @RahulGandhi ~ 🤣🤣😝😜 #AayegaTohModiHi https://t.co/Dh42WhTL77	HOF	OFFN	hasoc_2020_hi_1454
1127764639914151936	RT @Suthar1_Alka: मेरी माँ का गुरुर हूँ मैं माँ कभी कुछ कहतीं नही है पर मुझे देखकर अपने हर सपनें को वो मुझ में जी ले…	NOT	NONE	hasoc_2020_hi_4202
1127770096703655941	@bijendra125 जय श्रीराम ॐ नमः शिवाय हर हर महादेव #सुप्रभातम	NOT	NONE	hasoc_2020_hi_2103
1123517970024525824	RT @NandiniSarswat: मेरी पोस्ट पूर्णतया आयुर्वेदिक और प्राचीन जड़ी बूटियों से निर्मित है । इनको लाइक करने से आपके स्वास्थ्य पर कोई दुष्प्र…	NOT	NONE	hasoc_2020_hi_2257
1127578685429747712	RT @BebakAawaj: हर बार सैनिको के शौर्य पे क्यो वोट मांग रहे है नरेंद्र मोदी जी? दुश्मनो को करारा जवाब सेना देती है न कि सरकार मोदी के पहले…	HOF	OFFN	hasoc_2020_hi_4027
1127606111991779328	RT @RishiMishra_: भोपाल में दिग्विजय सिंह के खिलाफ भयंकर माहौल है MP के 10 वर्ष तक CM रहे ये हिन्दुविरोधी ऐसे चक्रव्यूह में फंसे है कि आज…	HOF	OFFN	hasoc_2020_hi_3783
1123615386895654912	@sweetanuu @EKVillainOO7 विलेन नाम बताईये अपनी gf का 😐😐😐	NOT	NONE	hasoc_2020_hi_1305
1123489633311035392	RT @KaleemK54018770: दोस्तों झूठे वादों का मुंह तोड़ जवाब देने का वक्त आ गया है अब नफरतें दूर करो अबकी अपना वोट सोच समझ कर दो यह भ्रष्टाचार…	NOT	NONE	hasoc_2020_hi_1046
1123487485806432257	शीकागो के दिवंगत मजदूर भाईयों को श्रद्धांजलि अर्पित करता हूं । https://t.co/387O8ynprr	NOT	NONE	hasoc_2020_hi_2902
1127526667650510848	मुझे अखिलेश यादव से एक शिकायत है। वे अपनी हर चुनावी जनसभा में कहते हैं कि जब यूपी में उनकी सरकार आएगी तो वे मुख्यमंत्री आवास से चिलम बरामद करवाएंगे। अरे भाई प्रधानमंत्री आवास से भी कुछ न कुछ मिलना चाहिए। पता तो चले उल्टे सीधे बयान किस चीज़ के सेवन करने के बाद निकलते हैं।	NOT	NONE	hasoc_2020_hi_2014
1127467410561220610	RT @Shalini21302918: कुछ लोग "just kidding" कहकर मन की पूरी भड़ास निकाल लेते हैं 😂😂😝😝	NOT	NONE	hasoc_2020_hi_1947
1127636579411828736	RT @SunitaRawat_: चुनाव प्रचार में सनी देओल हेंडपंप लेकर प्रचार कर रहा है ओर कुछ भाजपाई मूर्ख कह रहें हैं कि यह वही हेंडपंप है, जो पाकिस्ता…	HOF	OFFN	hasoc_2020_hi_2139
1123595560420642816	@Shanktan @smritiirani @narendramodi मोदी जी के आने के बाद में पप्पू पागलों की तरह के कुत्ते बनकर रोड पर घूमेगा इस बार फिर मोदी सरकार	HOF	OFFN	hasoc_2020_hi_4071
1127698474760204288	RT @AjayKum13838284: TMC को आतंकी संघठन घोषित करने का टाइम आ गया है 23 मई के बाद बंगाल को ममता से मुक्ति कभी भी बंगाल की ममता सरकार को बर्…	HOF	HATE	hasoc_2020_hi_1941
1127646205331116032	@Dhruv_Tatti_ इसके लिए क्या पराग्वे क्या पुर्तगाल...सब जमीन का टुकड़ा ही है। इसको मतलब है बस उसे हथियाने से।	NOT	NONE	hasoc_2020_hi_3594
1123638078113894401	RT @HusbandIndian: अवैध संबंधों में बाधा बन रहा था पति, पत्नी ने प्रेमी से करा दी हत्या.. [01 मई 2019] https://t.co/gHUVCq2bbL	NOT	NONE	hasoc_2020_hi_1414
1127560142403145728	RT @BJP4India: भ्रष्टाचार हो, महंगाई हो या 1984 में हजारों सिखों का कत्ल हुआ हो इनका जवाब यही होता है- 'हुआ तो हुआ'। जिस अहंकार में ये लोग…	HOF	HATE	hasoc_2020_hi_2080
1127524654422188032	@Meenakshi7771 100% झूठ बोलता है राहुल गांधी।	HOF	OFFN	hasoc_2020_hi_1910
1123646743541739520	बहुत बुरी खबर: सिद्धू का चाचा..केजरीवाल का मौसा और सुरजेवाला का पापा आतंकवादी घोषित हो गया! ''मसूद अजहर''	HOF	OFFN	hasoc_2020_hi_3750
1127798274004402176	RT @hsr315: तब मैंने बताया की प्लेन उसी स्पीड में उड़ाना, बस बादल की circumference में गोल गोल घुमाते रहना। सभी अफसर अब वाह वाह कर रहे थे,…	NOT	NONE	hasoc_2020_hi_4036
1127667852129914881	@BoduBD4452 @ssbsabhisingh62 योगी जी के अर्ज़ी लगाएँगे की साल भर मुख्य मंत्री रह आयें कश्मीर .... गली गली भगवा लहरायेगा 😅	NOT	NONE	hasoc_2020_hi_2053
1127583936714960896	RT @SajjanS11362661: @Khulkar_Bolo इसका जांच होना चाहिए पैंट्री कार और स्टेशन के दुकानदार मिले हुए हैं सरकार का टैक्स चोरी कर रहे हैं सरकार…	NOT	NONE	hasoc_2020_hi_3461
1127583336900243458	@shahfaesal ये तो बस इतना ही, हेलिकॉप्टर में जब साहेब को ठंड लगती थी तो वो पंखा ऑफ कर देते थे !! फ्यूल भी बच जाती थी और ठंड से भी छुटकारा 😂😂😉😉	NOT	NONE	hasoc_2020_hi_1279
1127651813111414785	RT @Binakahelunga: वो भक्त शालीन रहा होगा मैं होता तो जवाब देता मुल्लों का बाप 😝 https://t.co/MZSCt1dmZW	HOF	HATE	hasoc_2020_hi_2275
1127611669415284736	RT @SinghAwantika: प्रिय भोपाल वासियों, दिग्विजय सिंह की जमानत जब्त ना करवाई तो फिर क्या करवाया, यही वह बन्दा है जिसने हिन्दुओ को आतंकवादी…	HOF	OFFN	hasoc_2020_hi_388
1127538671781990401	RT @Mukesh195860: घोर मोदीजी विरोधी टुकड़े टुकड़े पत्रकार भी जब हुआ तो हुआ स्टेटमेंट पर राहुल के गुरू को" चुप कर "बोलने मजबूर हो गया. मो…	NOT	NONE	hasoc_2020_hi_4223
1127612520871579659	RT @NationFirst0010: T M C के कार्य करता और ममता की जिहादी जो बंगाल मे कर रहें हैं। किसी को वहां लोकतंत्र खतरे मे नही दिख रहा। ना ही इस…	HOF	OFFN	hasoc_2020_hi_45
1127638001264152576	अबे इतने पैसे बढे हैं तो सीधे ट्रॉफी खरीद लो ऐसे फिक्स करके क्या मैच जीतना होता है ग़द्दार #CSKvsMI #IPL2019Final #	HOF	PRFN	hasoc_2020_hi_1803
1123520796985446400	RT @Prerna22845841: 💞तबाह होकर भी तबाही दिखती नही ये इश्क़ है हज़ूर इसकी दवाई बिकती नहीं💞 https://t.co/8L3C8uN2ff	NOT	NONE	hasoc_2020_hi_2536
1127498737800978432	एक तरफ शालीनता, ज्ञान, अनुभव और सभ्य राजनेता और दूसरी तरफ अहंकार, दम्भ, असभ्य, कटु, दोगला, नरसंहारी, बेवकूफ, घमंडी और कायर राजनेता. चेहरे पे दबा हुआ गुस्सा तो देखो जैसे कि अभी उठ कर अटल जी पे हमला करेगा..🤦🤦 सुअर को कितना भी नहला दो, पर वो कीचड़ में ही जाकर लोटता है.😂😂	HOF	OFFN	hasoc_2020_hi_1769
1127464084457189376	@romspeaks Karti hai par majburiyan hai	NOT	NONE	hasoc_2020_hi_3788
1123818156345237504	@BhimKiBeti भाभी उंगली कैसी है । सुना फैक्चर हो गया था	NOT	NONE	hasoc_2020_hi_277
1123515629603098624	क्या गुजरी होगी उस बुढ़ी माँ के दिल पर जब उसकी बहु ने कहा -: माँ जी,आप अपना खाना बना लेना, मुझे और इन्हें आज एक पार्टी में जाना है। बुढ़ी माँ ने कहा -: बेटी मुझे गैस चुल्हा चलाना नहीं आता। तो बेटे ने कहा -:... https://t.co/ROAZ4eGERk	NOT	NONE	hasoc_2020_hi_1897
1123787428874072064	RT @imsiddhu4u: 400 सीटें पाने के लिए और कितने लोगों को संघ से जोड़ोगे मोदी जी:- केजरीवाल…😂 https://t.co/HTv6jIJTzp	NOT	NONE	hasoc_2020_hi_16
1123807444096946176	RT @sihagrakesh2013: चीन को पुरी दुनिया के सामने झुका देना,, भारत की अब तक की सबसे बडी कुटनितीक जीत है👈✌🏻✌🏻✌🏻✌🏻👌🏻👌🏻 चमचे अब भी दिवारो से…	NOT	NONE	hasoc_2020_hi_4377
1127643873306562560	भाई ने तो हद ही कर दी😂😂😂🤣🤣🤣🤣	NOT	NONE	hasoc_2020_hi_4376
1127474775725490176	RT @dhyeyravi10: 23 मई को राहूल गांधी ऐसा करेगा. @joshi_1996 @TajinderBagga @DrGPradhan @DarshitJoshi_ https://t.co/x4RXbvwXJd	NOT	NONE	hasoc_2020_hi_1130
1127812337505693696	RT @chacha_fuddu: अबे काफिरों तुम्हारा मुदी जब चाय बेचता था तो हमारी कोंग्रेस देश बेचती थी ओये जब मुदी चाय में डालने के लिए अदरक काटता था…	HOF	OFFN	hasoc_2020_hi_3822
1127473467119374337	न जाने क्यों आज के इंसान इस बात से अनजान हैं छोड़ देते हैं बुढ़ापे में जिसे वो माँ तो एक वरदान है पूछता है जब कोई मुझसे कि दुनिया में मुहब्बत अब बची है कहाँ ? मुस्कुरा देता हूँ मैं और याद आ जाती है “माँ” माँ है तो फिर सब कुछ है इस जहाँ में "मां" #ashutosh_shri_ #MothersDay https://t.co/G6iapMbmBi	NOT	NONE	hasoc_2020_hi_3763
1123578116344045569	UNSC ने आतंकी मसुद अजहर को अंतरराष्ट्रीय आतंकी घोषित किया🥰🥰🇮🇳🇮🇳 https://t.co/BtgUnhD3aG	NOT	NONE	hasoc_2020_hi_3495
1127493633345609728	RT @taapsee: ये उन औरतों के लिए जिन्होंने बचपन से सिर्फ़ अपने पिता की सुनी,शादी के बाद अपने पति की और उसके बाद सब बच्चों के लिए था।इन सब के…	NOT	NONE	hasoc_2020_hi_1369
1127720729712029698	हमेशा खुश और पाजिटिव रहिये https://t.co/6tQznBXX9U	NOT	NONE	hasoc_2020_hi_4229
1127530765523214336	RT @RakeshT73827202: कुछ लोग जीवित रहते अपनी तेरहवीं करा दिया करते हैं तो भाइयो नीचे देखिए ऐसी ही तैयारी में एक कांगिया। उधर "निरहुआ" के सा…	NOT	NONE	hasoc_2020_hi_3609
1127499933181853696	@dhruv_rathee कोई इनको समजाओ की वोह रडार है कोई टाटा स्काई का सेट अप बॉक्स नहीं जो बादल और बारिश में काम ना करें.....	NOT	NONE	hasoc_2020_hi_1549
1127489405453627392	@shruvking Mazaak hai	NOT	NONE	hasoc_2020_hi_4277
1127801029695721472	2018 में मोदी राज नही था क्या @BBCHindi	NOT	NONE	hasoc_2020_hi_2263
1127749699778121728	RT @50b3c5c9649b4e0: 28 साल पहले राजीव गांधी INS विक्रांत पर छुट्टीयां बिता रहे थे ये पता है, मगर पुलवामा मे RDX कौन लेकर आया यह अभी तक पता…	NOT	NONE	hasoc_2020_hi_3706
1123497698919772160	RT @Sagarika_das123: @RubikaLiyaquat @abpnewstv इसमें साजिश क्या है?? ABP वालों के पास इसका detail नहीं है क्या? या trp prog करना है...RB…	NOT	NONE	hasoc_2020_hi_2322
1127500520380346374	RT @DURGAGI48780097: @GoluSln @Krishan80208902 मणिशंकर कि आत्मा सैम पित्रोदा, ओर सिद्धु के आत्मा में विलय हो गया है, मणिशंकर अय्यर के काम इ…	NOT	NONE	hasoc_2020_hi_4343
1127481658611920896	चुनाव प्रचार में सनी देओल हेंडपंप लेकर प्रचार कर रहा है, ओर कुछ भाजपा मूर्ख कह रहै है, कि यह वही हेंडपंप है जो पाकिस्तान में उखाड़ा था और अंधभक्त इस की बात मान भी रहे हैं, बस में जानकारी के लिए बता दूं कि फिल्म गदर में जो हेंडपंप लखनऊ में उखाड़ा गया था, पाकिस्तान में नहीं!	NOT	NONE	hasoc_2020_hi_1662
1127592497268477952	RT @ReallySwara: उत्तर पूर्वी दिल्ली.. आज अपना हर वोट आपके अपने ⁦@dilipkpandey⁩ को दें! इस बार बड़ा आदमी नहीं अपना आदमी चुनें! Good luck Di…	NOT	NONE	hasoc_2020_hi_2003
1127561937577885698	RT @ArunbajpaiRajan: चमचो की हालत उस पीड़ित पत्नी जैसी है, जिसका पति दारू पीता है, जुआ खेलता है, मारता-पीटता है, पर वो कहती है, मेरा प…	HOF	HATE	hasoc_2020_hi_3323
1123548944951173121	गांठ उठाकर मारा टक्कर लेलो शक्कर गांठ हमारी सही सलामत लेलो शक्कर	NOT	NONE	hasoc_2020_hi_1019
1127610604078764032	RT @Sonam85769169: #SundayMotivation तीन देव की भक्ति करने के लिए किसी भी शास्त्र में प्रमाण नही है तो फिर ये मनमुखि साधना क्यों कर रहे है…	NOT	NONE	hasoc_2020_hi_1205
1127815315465707520	RT @AnupamConnects: मोदी जी इतने धड़ल्ले से झूठ क्यूँ बोलते रहते हैं?	HOF	OFFN	hasoc_2020_hi_323
1127481172072656896	@JaiveerShergill बस भाई अब क्या हँसा हँसाकर 23 मई से पहले ही मार दोगे।	NOT	NONE	hasoc_2020_hi_1945
1127547832137707520	@khanumarfa उसमे ये गन्दी सी शक्ल की कौन है	HOF	OFFN	hasoc_2020_hi_1535
1123622840182272000	@mlkhattar @BJP4Haryana @BJP4India जब तुम मुख्यमन्त्री थे जब तो न्याय दिया नही अब वोट लेने आए चक्कर मे झूठ बोल रहा है	NOT	NONE	hasoc_2020_hi_688
1127529377170743296	23 मई को पता चलेगा कि किस की हार पर जश्न मनता है और किसकी हार पर मातम ! मित्रों ! 23 मई आज़ाद भारत की एक एतिहासिक तारीख होने जा रही है । ये अचछा होगा देश के लिये या नही ये उस दिन पता चलेगा । #23may	NOT	NONE	hasoc_2020_hi_2066
1123678662170169344	Ch_jiyaa Sona hai ya jagna hai 🤔	NOT	NONE	hasoc_2020_hi_4196
1127625607095828481	RT @KuldeepKumarAAP: जो बात @ArvindKejriwal जी लगातार 3 महीनों से बोल रहे थे कि दिल्ली वालों के लाखों वोट भाजपा चुनाव आयोग के साथ मिलकर वो…	NOT	NONE	hasoc_2020_hi_3127
1127815487436361728	कांग्रेस के नारे 'अब होगा न्याय' का अर्थ यही है कि वो कबूल रहे है कि 60 सालो तक उन्होने अन्याय किया - मान. #नरेंद्र_मोदी_जी #HarVoteModiKo #PhirEkBaarModiSarkar #MainBhiChowkidar #ModiAgain #ModiHaiToMumkinHai https://t.co/gQd2bmXyG7	HOF	HATE	hasoc_2020_hi_879
1127462155098267648	@RahulGandhi आपका मोदी को प्यार करने का तरीका अच्छा लगा,ऐसा ही प्यार अपने घर वालों से भी करते होंगे?जैसे.पापा तुम दलाल,चोर हो,फिर गले मिल लिये..जीजू को-तू जमीन का दलाल ,फिर गले मिल लिये,बहन को तू दलाल की बीबी..फिर गले,ऐसे ही मां को गाली देकर गले😄 @priyankagandhi @JhaSanjay	HOF	OFFN	hasoc_2020_hi_3929
1127537740646510592	@pawanpandeysp @yadavakhilesh @dimpleyadav फिल्मों से बाहर नहीं निकल पा रहा रियल लाइफ को रील लाइफ से तुलना कर बैठा इसका घमंड चकनाचूर होगा राजनीति से तो पहले गयाब था इसका फिल्मों का कैरियर भी खत्म।	HOF	OFFN	hasoc_2020_hi_3953
1123607719728926720	RT @BJP4Rajasthan: यहां राजस्थान में कांग्रेस की सरकार बनी। अब यहां पर किस तरह के सवाल उठ रहे हैं... 10 दिन हो गए, 100 दिन हो गए, कर्जमाफी…	NOT	NONE	hasoc_2020_hi_703
1127466466805047296	RT @ravijee7446: इश्वर को ढूढते हो क्यो माँ पास ही तो है।	NOT	NONE	hasoc_2020_hi_705
1127545294588186630	@ArvindKejriwal Kejriwaal baccho ki kasam khaa ke tune sheila ji ki sehat ke baarr me kuchh nahi kaha.	HOF	OFFN	hasoc_2020_hi_1690
1127629579110141952	RT @BebakAawaj: @RahulGandhi आप ने मोदी से सीखा की देश कैसे नही चलाना चाहिए लेकिन मोदी जी किसी से कुछ नही सीखते। क्योंकि वो संघी विचारधारा…	NOT	NONE	hasoc_2020_hi_1804
1127814329821097996	RT @TajinderBagga: आतिशी वाला पर्चा क्या आम आदमी पार्टी के अलावा किसी को ट्वीट करते देखा ? कितनी नीचता पर गिरेंगे केजरीवाल गैंग ? अपनी ही…	NOT	NONE	hasoc_2020_hi_1110
1123524810904985601	@9ddeet4p @AJEnglish @ImranKhanPTI वे पाकिस्तानी मुस्लिम हैं और @ImranKhanPTI को उनके लिए मूलभूत सुविधाएं उपलब्ध करवाई जानी चाहिए।	NOT	NONE	hasoc_2020_hi_3564
1127735632086720512	RT @neel23456: @RahulGandhi इसे ऐसे भी कहा जा सकता है- जिसने गिद्ध और सांप की गलबहियां की कल्पना भी ना की हो वो इस इंटरव्यू को देखकर अपनी…	NOT	NONE	hasoc_2020_hi_1924
1123647997630472197	@fairy_aadeez Zahir hai😂😂💞🙋	NOT	NONE	hasoc_2020_hi_3720
1127770700683460609	क्या कह रहा है ये चेहरा😂😂उतर हुआ चेहरा हार दिखाई दे गईं है 😂 https://t.co/djGhJnGJwB	NOT	NONE	hasoc_2020_hi_1894
1.12754e+18	RT @RishiMishra_: UP में दलितों में जाटव और कोरी समुदाय को छोड़कर हर तबके में भाजपा ने सेंध लगाई है राजभर और पासी वोट का 90% कमल का है OBC…	NOT	NONE	hasoc_2020_hi_3964
1127598834865958915	RT @bhumihar_kajal: @DrKumarVishwas सर हिटलर के कुनबे से आती है मोमता कहीं आप को भी BJP का अजेंट न बोल दे वैसे भी बंगाली हिटलर की लंका ज…	HOF	OFFN	hasoc_2020_hi_3114
1127630812243906560	RT @BJPLive: यही कारण है कि आज कांग्रेस देश की डिफेंस पॉलिसी, हमारी रक्षा नीति डिस्कस ही नहीं करना चाहती। कांग्रेस कहती है कि मोदी आतंकवाद…	NOT	NONE	hasoc_2020_hi_3280
1123534290065575938	RT @JangirNarottam: GSTको गब्बर सिंह टेक्स बताने वाले आउल बाबा @RahulGandhi अप्रेल माह का GST collection अपने रिकॉर्ड 1.13 लाख करोड़ पर प…	NOT	NONE	hasoc_2020_hi_552
1127610104977584128	RT @VishalKansara15: इससे बड़ा दुर्भाग्यपूर्ण क्या होगा कि सिद्धू खुद एक "सिख" हो कर सिक्खों" के हत्यारों का साथ दे रहा है। जो अपनी कौम तक…	NOT	NONE	hasoc_2020_hi_4165
1123624324957491201	@Rajput_Ramesh @waglenikhil @RifatJawaid @waglenikhil @RifatJawaid इन दोनों का स्वराज ज्वालामुखी की तरह आग फेंक रहा है 🤗🤗😝🤣🤣 https://t.co/GTcK5dXsMn	NOT	NONE	hasoc_2020_hi_1647
1127574906357436417	RT @KaranwalTanu: मेरे विचार से मदर्स डे हर रोज़ मानना चाहिए जब हमारी माँ हमारा हर दिन इतना ध्यान रखती है प्यार करती है हमारी हर छोटी छोटी…	NOT	NONE	hasoc_2020_hi_360
1127471575505211393	RT @BSPSupporterl: भारत के मीडिया का स्तर इतना नीचे गिर गया है कि विदेशी मीडिया इनका मज़ाक़ उड़ाती है। आजकल मीडिया जुमले बाजों के साथी बनके…	NOT	NONE	hasoc_2020_hi_3282
1123766750976327686	भारतिय सेना से दुश्मन देश थर- थर कांपती है तो देश अन्दर का दुश्मन की क्या औकाद की भारतिय सेना के सामने चुनाव लङ पाती। तेज बहादुर जिन्दाबाद तु ने साबित कर दिया की चुनाव आयोग किसी एक पार्टी की भङवा बन गई है। देश खतरे में है जनता का भविष्य भी अंधकार ही होगा।	HOF	HATE	hasoc_2020_hi_4108
1127567365003104257	वन्देमातरम्।	NOT	NONE	hasoc_2020_hi_2241
1123531765065211904	RT @AAPHaryana: हमें भगवान पर भरोसा है, हमें सुरक्षा की कोई जरूरत नहीं। हम अपनी सुरक्षा वापिस कर रहे हैं, चुनाव आयोग को पत्र लिखकर कहेंगें…	NOT	NONE	hasoc_2020_hi_829
1127782021093216256	@ZeeNewsHindi इनको भी सिद्धू वाली हवा लग गई है पाकिस्‍तान भेज दो वहा के चुनाव में जाकर प्रचार करेगे तो अच्‍छा होगा	NOT	NONE	hasoc_2020_hi_1324
1123664892295127040	RT @Great_Legion: चौकीदार हिजड़ा है #GadchiroliNaxalAttack #Gadchiroli	HOF	PRFN	hasoc_2020_hi_3150
1127543864334659586	RT @devtimes: @SheilaDikshit @ArvindKejriwal आप के बारे में अफवा फैला कर तो बंदा CM बन गया😊😊😊	NOT	NONE	hasoc_2020_hi_3138
1127716535429025793	@narendramodi अपने इंदौर आ कर हमारा सबका दिल जीत लिया काल आप के आने का स्वगात इतना जबरजस्त था आज तक इतने नेता आये पर कभी भी इतनी भीड़ नही देखी ! हर मोदी https://t.co/JSsrNdxPlw	NOT	NONE	hasoc_2020_hi_1944
1127591238998171650	RT @PawanDurani: क्या आम आदमी की नेता ने मोदी को वोट दिया ? https://t.co/CB64u8FhpA	NOT	NONE	hasoc_2020_hi_154
1127493587187507200	भ्रष्ट राजनेताओं का काला चेहरा उजागर करने वाले ईमानदार पत्रकारों की हत्या कर दी जाती है। जनाब यहां सच बोलने की यही सजा मिलती है। https://t.co/Pcr8PGN96D	NOT	NONE	hasoc_2020_hi_3837
1127626055903088640	RT @ajitanjum: एक बेटे की माँ के दिल को ठेंस पहुंची न @tavleen_singh जी , जरा सोचिए हर रोज न जाने कितनों को पाकिस्तानी करार दिया जाता है.…	NOT	NONE	hasoc_2020_hi_49
1123481722841071616	RT @Kuldip97675012: #KabirIsGod इस पूरी पृथ्वी ही नहीं बल्कि 21 ब्रह्मांड में संत रामपालजी के अलावा खुदा कहो राम कहो अल्लाह कहो गुरु कहो को…	NOT	NONE	hasoc_2020_hi_580
1127480551298850816	RT @Aastha9305: केवल मुसलमान हैं देश में रहने के हकदार- मणिशंकर अय्यर इसकी #अम्मी ने पक्का किसी #मौलवी से #हलाला करवाया होगा	HOF	OFFN	hasoc_2020_hi_1387
1127506828592467968	RT @myogiadityanath: जो सरकारी बंगला छोड़ते वक़्त वहां की टोंटी तक उखाड़ ले जाता हो, जो अपने पिता तक को अपमानित करता हो, जिसके राज़ में गुं…	NOT	NONE	hasoc_2020_hi_590
1127803131021135872	RT @Me4Bharat: @INCIndia वो डिजिटल कैमरा जापान से आया था बेवकूफ जापान की तरक्की से खुद की मूछों पर ताव देते कांग्रेसी *chuतिया 😂😂	HOF	PRFN	hasoc_2020_hi_2920
1127591838779445250	RT @indiantweeter: दल्ले तू अपनी नौकरी तो बचा नहीं पाया किसी की पगार कैसे काटेगा। https://t.co/ulF7OqFvDc	HOF	OFFN	hasoc_2020_hi_243
1127557344806653952	RT @narendramodi_in: ये कितने भी हवन करा दें, ये कितने भी जनेऊ दिखा दें, पुलिस को भगवा ड्रेस भी सिलवा दें, लेकिन भगवा में जो आतंक के दाग ल…	HOF	OFFN	hasoc_2020_hi_245
1127803693057708032	क्या है गर्मियों में गर्म जल से नहाने के नुकसान🤔 व कुछ ऐसे महत्वपूर्ण टिप्स जिन्हें गर्मियों में अपना कर रह सकते हैं पूर्ण स्वस्थ!! जानेंगे Sant Shri Asaram Bapu Ji से👇🏻 #SummerHealthTipsByBapuji https://t.co/jVDUp1rrhz https://t.co/Q28dEndmjT	NOT	NONE	hasoc_2020_hi_3156
1123585527654035456	@1cp__23 But hayasaka is better than chika	NOT	NONE	hasoc_2020_hi_1706
1123529181403414528	apnee qeymatee rahi se humee agaa kerry kyaa aisaa hee hai ya naii?????? https://t.co/GOnjDaOD57	NOT	NONE	hasoc_2020_hi_2827
1127711602915123200	RT @Dildars40799329: @JavedAlamPES6 @KaleemK54018770 काँग्रेस की जलन है "महा ज्ञानी" आविष्कारक मोदी जी से जिन्होने बादलों के अंदर छोटे छोटे…	NOT	NONE	hasoc_2020_hi_4051
1123783486245044224	इसे कहते है थूक कर चाटना https://t.co/LhRLeV7HLF	HOF	OFFN	hasoc_2020_hi_2910
1123699671451557896	आज की रात कुछ घरो में बिना लाइट के कट रही है क्या कोई कुछ कर सकता है???	NOT	NONE	hasoc_2020_hi_4031
1127539695167115269	RT @BJP4India: राजस्थान में शर्मसार करने वाली घटनाएं हो रही हैं। वहां कांग्रेस सरकार आने के बाद 27 घटनाएं दलितों पर अत्याचार की हुई हैं: श्…	HOF	HATE	hasoc_2020_hi_3067
1127519944185270273	कांग्रेसी भारत से भागने ना पाये उनको जेल बन्द कर रोज कोडा मारना है	HOF	HATE	hasoc_2020_hi_27
1123626044659908608	RT @brajeshabpnews: यूपी के बाद अब एमपी के नेताओं पर चुनाव आयोग की कारवाई, जबान संभाल कर बोलो https://t.co/u7kKuH9nhi	NOT	NONE	hasoc_2020_hi_3139
1127746692458139648	RT @PriyaGu01402373: हर लड़की के पास पानी की बोतल के साथ एसिड की भी बोतल होनी चाहिए, ताकि हवस के दरिंदों को सबक सिखा सकें 😡😡😡😡😡😡😡	HOF	PRFN	hasoc_2020_hi_1447
1127803621742006272	लगता है क्या मोदी जी का फ़ोटो शॉप्पिंग किया है। ?? गौर करें।?	NOT	NONE	hasoc_2020_hi_1511
1127584888796762112	RT @Shalini21302918: देखकर मेरी #आँखें एक #फकीर कहने लगा, पलकें तुम्हारी #नाजुक हैं जरा #ख्वाहिशों का #बोझ कम कीजिए 💫💫💔💔💫💫💔💔💫💫💔💔	NOT	NONE	hasoc_2020_hi_1765
1123626053019111425	RT @IPSinghSp: अमित शाह की बंगाल में रैली, भीड़ देखकर ही अंदाज़ा लगाया जा सकता है कि भाजपा बहुमत की ओर है। 😁 https://t.co/9m5bxC84jW	NOT	NONE	hasoc_2020_hi_1754
1127772604863926273	@ZeeNewsHindi बहुत सही कहा मोदी जी ने।अब दलित प्रेम समझ आयेगा।	NOT	NONE	hasoc_2020_hi_3259
1123526824196108288	@aajtak जब लोग घूंघट पहनकर बम फोड़ेंगे	NOT	NONE	hasoc_2020_hi_3408
1127483168552939523	RT @Payal_Rohatgi: हिन्दु तुम्हें #राष्ट्रवादी करके या फिर #आतंकवादी करके Liberals पुकारे 🤔। तुम्हारे ज़मीर की आवाज़ क्या कहती है 🤨। तुम्हा…	NOT	NONE	hasoc_2020_hi_297
1123649264322732032	RT @AnjuMishraaa: @V0000N @RahulGandhi @anuraagmuskaan @Nimki_mukhiya @ashokshrivasta6 देखिए कैसे मोदी जी ने इसकी जुबान बदल दी https://t.co…	NOT	NONE	hasoc_2020_hi_3445
1123495958287794176	RT @manakgupta: “मेरा असली कैम्पेन तो 23 मई के बाद शुरू होगा. लोकसभा के बाद दिल्ली सरकार से भी केजरीवाल को हटाना है.” #DelhiDangal में @p_…	NOT	NONE	hasoc_2020_hi_2611
1127556556260659200	@ShantiL80939764 @SanjayKumar_IND @champ4561 गांड तो तुम चमचे मरवाते हो	HOF	OFFN	hasoc_2020_hi_1997
1123593811404312577	RT @BJPLive: मोदी जी वो नेता हैं जनता जिनकी 70 साल से राह देख रही थी, ऐसा नेता जो देश की जनता की चिंता करे, देश के गरीबों, किसानों, पिछड़ों…	NOT	NONE	hasoc_2020_hi_4187
1127492228258123777	RT @mehararahul2299: बहुत दिनों से टुकड़े टुकड़े गैंग का नाम लिया जा रहा था, समझ में नहीं आ रहा था के ये आखिर हैं कौन, कल कुछ ऐसा हुआ के आं…	NOT	NONE	hasoc_2020_hi_4232
1123753220151574536	RT @khorwal_sunil: कबीर हरि के नाम बिना ये नार(औरत) कुतिया होय| गली - गली भोंकत फीर टुक ना डाल कोय|| http://t.co/ewAOXipuy0	HOF	PRFN	hasoc_2020_hi_3336
1127482384222441472	@SirWB Nirvana is the lie?	NOT	NONE	hasoc_2020_hi_2752
1127636814292873216	RT @DaisyJa37479750: चढ़ती थी उस मजार पर चादरें बेशुमार, और बाहर बैठा एक फ़क़ीर सर्दी से मर गया।	NOT	NONE	hasoc_2020_hi_3086
1127748613453561856	Kawhi is HIM	NOT	NONE	hasoc_2020_hi_3195
1127560918362140677	@i_theindian @RahulGandhi भाजपा भी गजब पार्टी है: ◆ आतंकी इनकी साध्वी है ◆ आसाराम इनका संत है ◆ रामरहीम इनका गुरु है ◆ कुलदीप सेंगर इनका नेता है ◆ तड़ीपार इनका अध्यक्ष है ◆ दंगायी इनका लौह पुरुष है ◆ कायर सावरकर इनका वीर है ◆ हर आतंकी के लिए भाजपा मे जगह है #23_मई_भाजपा_गई	HOF	HATE	hasoc_2020_hi_2389
1127524377593958400	RT @mssirsa: केजरीवाल ज़ी वो 300 पन्नों का सबूत ले जाना मत भूलना शीला जी के घर!! @ArvindKejriwal https://t.co/Oy4m91yn0G	NOT	NONE	hasoc_2020_hi_3854
1127787310093717504	RT @BebakAawaj: ये आदमी सिर्फ गिरी हुई राजनीति करने आया है इसे सिर्फ वोट और सत्ता से मतलब है? आज राजस्थान मे हुए दलित बेटी के अत्याचार पे…	HOF	OFFN	hasoc_2020_hi_504
1127535261796196352	बूथ पे जाओ मोदी लाइन लगी है @narendramodi_in @MLekhiOffice	NOT	NONE	hasoc_2020_hi_979
1127597039716450304	RT @NikeshNandan: कांग्रेस के "हुआ तो हुआ" के बाद… अब केजरीवाल ने लॉन्च किया "बिका तो बिका"…😂 #6_करोड़	HOF	OFFN	hasoc_2020_hi_3667
1127556975699488768	RT @ModiLeDubega: पत्तलकार चोर रसिया: क्या यही सही है? अभिनंदन कह रहा था Fighter jets स्टार्ट नही हो रहा था मोदीजी: हाँ खराब मौसम के कारण…	HOF	OFFN	hasoc_2020_hi_254
1123615474980347904	RT @AshishVK7771: ये तेरी हल्की सी नजरअंदाजी और थोड़ा सा इश्क़ ये तो बता ,ये मजा-ऐ-इश्क़ है या सजा-ऐ-इश्क़ 💞💞	NOT	NONE	hasoc_2020_hi_3890
1127509785597710336	@im_rajrishi18 @pbhushan1 पहले तुम्हे जान लेना चाहिए कि 70 साल में तुम्हे किस तरह एक मानसिक तौर पर गुलाम बनाया है कांग्रेस राज में और वो भी आजादी के बाद। अब उस मानसिकता का इलाज कर रहे है मोदी। रोजगार ढूंढो और बनाओ। यहां बैठ कर ताने मत मार	NOT	NONE	hasoc_2020_hi_3703
1127576898643476480	RT @VikasAgarwalBJP: क्या आपने वोट डालते समय इस बात का ख्याल रखा कि उंगली बटन से टूँ की आवाज आने के बाद ही हटानी है तभी आपका वोट गिना जाएगा…	NOT	NONE	hasoc_2020_hi_2788
1123631019096035329	RT @drdineshbjp: आतंकी मसूद अजहर को संयुक्त राष्ट्र संघ द्वारा अंतरराष्ट्रीय आतंकी घोषित किया जाना, भारत की बड़ी और कूटनीतिक सफलता है। यह न…	NOT	NONE	hasoc_2020_hi_570
1127667030071496704	RT @Jekki_KHaN_786: गांव के सरपंच व उच्च कोटि के दलालों की खरीदारी के बावजूद आम जनता टिकी हुई है #कांग्रेस के साथ अपने हरियाणे मे बंपर…	NOT	NONE	hasoc_2020_hi_1968
1127776501376532481	RT @BJP4India: ये चुनाव गरीबों के लिए दिन रात मेहनत करने वाले हम लोग और सामने अहंकार में डूबकर हर बात पर हाथ ऊपर कर देना और यही कहना- 'हुआ…	NOT	NONE	hasoc_2020_hi_1248
1127504454620549120	RT @HarishKhuranna: इस विडीओ को देखने के बाद कुछ रह जाता है क्या ? @BJP4Delhi जो शुरू से कहती आ रही है की @ArvindKejriwal भ्रषट व्यक्ति है…	HOF	OFFN	hasoc_2020_hi_2982
1123596273477726209	ये bjp और कांग्रेस के नेता तो नही लड़ रहे हैं आपस मै पर इनके followers ने Facebook मै गंदगी मचा रखा है वैसे मोदी जी ही आएंगे	NOT	NONE	hasoc_2020_hi_1826
1127782285313331200	RT @ArchanaNautiyal: बहुत शर्म और दुःख का विषय है ये । एक चरित्रवान कट्टर राष्ट्रवादी स्कॉलर जिसकी देश के घर - घर में चर्चा होती है , उसके…	NOT	NONE	hasoc_2020_hi_3860
1127551359522185216	RT @sambit_swaraj1: जिसने तुम्हें लूटा उसकी जय जयकार करते रहे. और अब जो तुम्हारे हक के पैसे लाने में जुटा है उसको ताने मार रहे हो गालियाँ…	NOT	NONE	hasoc_2020_hi_3974
1127467980969791488	कुछ दिनों के बाद हिंदुओं के इतने बुरे हाल होने वाले हैं अगर अभी से कांग्रेस को रोका ना जाए।	NOT	NONE	hasoc_2020_hi_672
1127660705027506176	RT @SunitaR67477606: जांगले में मंगल ____|| Part ..3 https://t.co/cMj3ZSy6lo	NOT	NONE	hasoc_2020_hi_2073
1123712317282246658	@PiyushGoyal @narendramodi नेतृत्व मिल चुका है, जनता अपना प्रधान मंत्री चुन चुकी है। बस औपचारिकताएं चाल रही हैं, २२ मई को समाप्त हो जाएंगी। मोदीजी पुनः जनता की सेवा करेंगे।	NOT	NONE	hasoc_2020_hi_1069
1123599947675389953	@SSPANDE45410999 *यथा ह्येकेन चक्रेण न रथस्य गतिर्भवेत्*। *एवं परुषकारेण विना दैवं न सिद्ध्यति*।। *अर्थार्थ:- जैसे एक पहिये से रथ नहीं चल सकता है । उसी प्रकार बिना पुरुषार्थ के भाग्य सिद्ध नहीं हो सकता है।।* 🙏 *जय श्री हरिः विट्ठलेश्वराय् नमः*🙏	NOT	NONE	hasoc_2020_hi_2642
1127655965468192768	@ursrashi हा चाटना हा मस्त	HOF	PRFN	hasoc_2020_hi_1674
1123507974968827906	RT @aajtak: Breaking News: हम तो फकीर आदमी हैं, झोला लेकर निकल लेंगे: PM मोदी https://t.co/9sk8tHNITL	NOT	NONE	hasoc_2020_hi_2724
1123537926489460736	@KailashOnline ईश्वर उनकी आत्मा को शांति प्रदान करें ॐ शांति शांति शांति https://t.co/DYNFdctL0L	NOT	NONE	hasoc_2020_hi_3966
1127814199797735424	RT @Saffron_Rounak: ये निम्न स्तर की राजनीति में सिर्फ राज करने से मतलब होता है , यहां नीति को कोई नहीं पूछता गौतम के बारे में उनके साथी ब…	NOT	NONE	hasoc_2020_hi_2155
1127492983199166465	RT @PrakashJavdekar: फिर भी हमें विश्वास है की लोग गंभीरता से वोट कर रहे है और वोट करेंगे और पश्चिम बंगाल से इस बार बहुत ही अलग नतीजे आयें…	NOT	NONE	hasoc_2020_hi_2701
1127518870464385024	@RPPATTNAIK1 इतना मत दिमाग लगाइये ,गलत हमेशा गलत ही रहता है😊	NOT	NONE	hasoc_2020_hi_1006
1127555474130292736	निरहुआ की अगली फिल्म कभी न लड़ब चुनाव #आजमगढ़ @MLArajeshSP	NOT	NONE	hasoc_2020_hi_1109
1127654258411655169	RT @msdohare19: देश के 70 साल आज़ादी के होने के बाद भी इनकी मानसिकता देखो कहने वाले कहते है की #जातिवाद #खत्म हो #चुका है परन्तु जातिवादी…	NOT	NONE	hasoc_2020_hi_2668
1127555285394935810	RT @BJP4Bihar: चुनावों में अपनी हार स्पष्ट देख कर महामिलावटी दल गुंडागर्दी पर उतर आये हैं। बेतिया में #NDA प्रत्याशी श्री @sanjayjaiswalMP…	HOF	HATE	hasoc_2020_hi_3072
1123669619263397889	@vinodkapri @RahulGandhi सोशल मीडिया बड़ा आसान हो गया है कुछ भी बोल दो लाख में से 10 तो ऐसे मिल ही जाएंगे जो बड़ी आसानी से यकीन भी कर लेंगे और उसके लिए बहस भी करेंगे लोगो से	NOT	NONE	hasoc_2020_hi_1013
1123737810274529280	RT @DasiKushwah: @CallendraD भाई अरबपतियो का तो कब का माफ हो गया जी इंतजार तो किसानो की किस्मत में है... जो करना चाहे उन्हे करने नही दे रहे…	NOT	NONE	hasoc_2020_hi_1979
1127782687979106308	@__kashyap__ हर हर महादेव🙏🌹🙏	NOT	NONE	hasoc_2020_hi_1565
1127796831189110785	RT @Hansrajmali17: #Allah_Kabir गंगा काठे घर करे,पिवे निर्मल नीर। मुक्ति नहीं हरि नाम बिन,ये कह रहे साहेब कबीर।। कुम्भस्नान पर पहले नहाने…	NOT	NONE	hasoc_2020_hi_662
1123617035261317120	@Kiranja34522516 @Kavita_Sharma4 @RahulGandhi इतनी खुशी.... इतनी खुशी बता नहीं पा रहा हूं	NOT	NONE	hasoc_2020_hi_2486
1127768586724896768	RT @SudhinBhadoria: मोदीजी आप को आज तक मजबूरन, दलित छात्र रोहित वेमुला की आत्महत्या का दर्द नही समझ में आया,नजीब जो 2 वर्षों से घर और कॉलेज…	HOF	HATE	hasoc_2020_hi_2627
1127637103687266304	@AcharyaPramodk “मॉ” किसी दिन, पल की मोहताज नही होती। ‘मॉ’ बस ‘मॉ’ होती है। हर पल, हर घड़ी जो मेरे साथ थी, है और रहेगी।	NOT	NONE	hasoc_2020_hi_2300
1127754158348558336	RT @subodh_tailang: कांग्रेस अपनी हार सामने देखकर इतनी बोखला गई है कि कोंग्रेस समर्थक पीठासीन अधिकारी ने अमेठी में गौरगंज के गूजरटोला बूथ…	HOF	HATE	hasoc_2020_hi_2639
1123633556633243648	RT @shiksha_mitra: लगातार हो रही #शिक्षामित्रों मौत जिम्मेदार खामोश न कोई सामधान न कोई उपचार क्या यही है बीजेपी सरकार संकल्प पत्र द्वारा…	NOT	NONE	hasoc_2020_hi_3910
1123522554386423808	RT @TheRitamApp: तत्कालीन सरकार के इशारे पर पूरे हिन्दू समाज को बदनाम करने की लिए, मुझे फंसाने की साजिश चल रही थी और इसमें सभी जांच एजेंसि…	NOT	NONE	hasoc_2020_hi_822
1123817552365391872	@Uppolice @hardoipolice शर्म करों	NOT	NONE	hasoc_2020_hi_4228
1127749267760697344	RT @Ma_dhuri: जब तेरे ख़त सिरहाने रखते हैं, लगता है जैसे खज़ाने रखते हैं। तुमको तन्हा चलने की आदत क्यों, हम तो साथ अपने ज़माने रखते हैं।…	NOT	NONE	hasoc_2020_hi_1922
1127519155651895296	@Maharshyam1124 भाई फोल्लोविंग कर डिजिये जी	NOT	NONE	hasoc_2020_hi_3945
1127631546234523648	मेरी छवि दिल्ली के खान मार्केट गैंग ने नहीं 45 साल की तपस्या ने बनाई: प्रधानमंत्री मोदी https://t.co/F2JZHfthVE	NOT	NONE	hasoc_2020_hi_3100
1127562113721831424	@abhisar_sharma तू भड़कता क्यों है इतना। पिछवाड़ा पेट्रोल से धोते हो क्या।	HOF	PRFN	hasoc_2020_hi_433
1123790671083708416	RT @SudhirKumarD1: @sonamJain001 सोनम जैन के नाम से जिसने आई डी बना रखी है असल मेँ वह एक हिजडा है। इसकी बातोँ का बुरा न माने, हिजडे भी हमा…	HOF	OFFN	hasoc_2020_hi_407
1127546695456190464	अगर मतदान के दिन आपकी ऊँगली पर स्याही का निशान नहीं है तो अगले पाँच साल तक, आपको किसी के ऊपर ऊँगली उठाने का अधिकार नहीं है। *उठिए और मतदान करें ।*	NOT	NONE	hasoc_2020_hi_2398
1123567735420489729	RT @Randhirkush: #ThursdayThoughts जैन धर्म के प्रवर्तक वाली आत्मा बाबा आदम बने, उनको स्वर्ग में भी चैन I अधिक जानकारी के लिए अवश्य देखें…	NOT	NONE	hasoc_2020_hi_2698
1127810894677676033	@gapareek @Sonam_Sharma3 @Kavita_Sharma4 घर बार छोड़ कर होटल में खा रहा है ?? या घर से भाग लिया ??	NOT	NONE	hasoc_2020_hi_2725
1127486922455019526	@ArvindKejriwal . सारी	NOT	NONE	hasoc_2020_hi_3541
1127612374091948032	स्मृति मैडम — क़र्ज़ा तो माफ़ हो गया , क्यूँकि —कांग्रेस का वचन था ,जो पूरा किया !! लेकिन —मोदी जी के १५, लाख , किसानो की दोगुनी आय , और २, करोड़ नौकरियों का क्या हुआ , उनके बारे तो पूछ लेती !@OfficeOfKNath @RahulGandhi @priyankagandhi https://t.co/rMSU6CI3Ia	NOT	NONE	hasoc_2020_hi_4245
1123585846429401088	टिकट ❌कटने से नाराज इस महिला👩 एमपी ने जब भेंट किया 💐गुलदस्ता, तो पीएम मोदी ने पूछा.. https://t.co/GjEDZMc3N2 via @UP AAJTAK	NOT	NONE	hasoc_2020_hi_1470
1123820152825499648	RT @Deepakkhatri812: अगले 72 घंटों तक संघियों का भोपाल में ऐसा हाल किया चुनाव आयोग ने😁😂🤣 https://t.co/NhY9IwJvIr	NOT	NONE	hasoc_2020_hi_1848
1127769907951751168	वोट उसे दो कि बाहर आकर मुँह छुपाना न पड़े! ओर शान से कह सको कि मोदी को वोट दिया!	NOT	NONE	hasoc_2020_hi_3588
1123611331033047046	RT @Sjp4India: मज़बूत हाथ और फौलादी बाहें, पर्वत चीर कर बना दे राहें, अपने कर्म,धर्म और श्रम से, भारत का जो निर्माण करें समाजवादी हर श्रमिक…	NOT	NONE	hasoc_2020_hi_3093
1127506363037302784	तुझे पेमेंट मिल गई क्या 🤣	NOT	NONE	hasoc_2020_hi_1846
1127564500297641989	गुजरात उन पांच राज्यों में से एक है जिसमें हालिया दलितों पर अत्याचार में बढ़ोतरी दर्ज हुई हैं गुजरात: बारात में हुई घुड़चढ़ी तो दलितों के साथ किये तरह तरह के अत्याचार! https://t.co/U1OSpgs03w	HOF	HATE	hasoc_2020_hi_1362
1123493890521219072	@ArvindKejriwal बहुत जल्द delhi से बहार का रास्ता देखना होने वाला है	NOT	NONE	hasoc_2020_hi_591
1127460766766919680	RT @Badka_Bokrait: आएगा तो मोदी ही. लेकिन बादल हुए तो मालूम नहीं चल पाएगा.	NOT	NONE	hasoc_2020_hi_1160
1123580330936430593	@BBhuttoZardari अबे भड़वे के बीज पहले अपनी संभाल ले वहाँ फटी पड़ी है पाकियों की ।	HOF	PRFN	hasoc_2020_hi_2175
1127524562109775872	कहाँ से आती रहोगी	NOT	NONE	hasoc_2020_hi_3809
1127716623488413696	@aajtak कांग्रेस ने 1947 से ही लोगो की हत्याएं किराई है,इनकी यही असलियत है,मोदीजी ने 40 बोला है दो,चार आगे पीछे ही होगा, क्योकि देश की जनता देश दिरोहियो को सबक सिखा रही,BJP + 400 सीटें जीत रहें।। हर हर महादेव	NOT	NONE	hasoc_2020_hi_2529
1127532522902974464	RT @SaffronAvnish: जब बंदे से पूछा : क्या तुम्हे विपक्ष से प्रॉब्लम क्या है तब 1 ही सांस में @RahulGandhi और सभी विपक्षियो दलो के नेताओ का…	NOT	NONE	hasoc_2020_hi_3162
1123792936007815168	जब गांव लगी फटने तो ये लगे घटने, दोष आने कर्मों के फोडें दूसरों पर।। जब जनता साथ छोड़ती है, तब दोष evm झेलती है।। जब साथी इनको कूटते हैं ये मोदी मोदी करके रोते हैं।।	HOF	PRFN	hasoc_2020_hi_349
1127752723875557376	RT @karuneshtripa14: जिस दिन ये आदमी PM बन गया तब ये सोचोगे कि मोदी जी कितने मासूम थे https://t.co/VSxEidsoFF	NOT	NONE	hasoc_2020_hi_2169
1123532436179181569	RT @VivekmMisra: उसी गुजरात से शेर मंगाने के लिए अखिलेश भैया ने 7 बार चिट्ठी लिखी थी,अगली बार जब उनके चरणों मे लोटने जाइयेगा तो मेरी बात की…	NOT	NONE	hasoc_2020_hi_1354
1127711732934144000	RT @BebakAawaj: @yadavakhilesh जनता साफ दिखा रही कि उसने तय कर लिया है बाबा की कोई सभाएं नही दिखाई दे रही है। बार बार बॉटने और जनता के अंद…	NOT	NONE	hasoc_2020_hi_2726
1127631609136422912	Ye bumrah lodu phir G maar dega	HOF	PRFN	hasoc_2020_hi_2680
1127642854099054592	@MamataOfficial हमारे देश की रक्षा के लिए इस ममता बनर्जी को पश्चिम बंगाल से हटाओ पश्चिम बंगल बचाओ यह सिर्फ राउडी असम करा है	HOF	HATE	hasoc_2020_hi_3612
1127592233048465408	@sunny_tweetss Khan abba ky samny nhe chalta na akelay me sab chalta hai phir abba ki look he kafo hoti hai 😈😂😂	NOT	NONE	hasoc_2020_hi_1823
1123809889380384773	RT @nishantchat: अब कहीं चुनाव आयोग UN को खत लिख कर ये ना कह दे कि मसूद को अभी अंतराष्ट्रीय आतंकी घोषित करना आचार संहिता का उलंघन है 🤣 #Ma…	NOT	NONE	hasoc_2020_hi_1712
1127630917089013760	पठानकोट एयरबेस की आईएसआई से जांच कराने वाला आई एन एस विराट पर सोनिया गांधी की उपस्थिति पर प्रश्नचिन्ह लगा रहा है ।	NOT	NONE	hasoc_2020_hi_2146
1127615733712560128	RT @dgurjarofficial: बाबा ज्ञानेंद्र का नया ज्ञान &gt; इतना क्लाउड है विमान राडार की पकड़ में नहीं आयेंगे, सच में इतना ज्ञान इनके सिवा किसी…	NOT	NONE	hasoc_2020_hi_3881
1123792201979396096	RT @Pandey__Pramod: योगी जी बच्चा पैदा नही कर सकते: अलका लांबा @LambaAlka जी आपको कैसे पता चला कुटिया में गई थी क्या ?🤔😛😂 #भाभी_की_राशनका…	HOF	OFFN	hasoc_2020_hi_1610
1123497472456740865	RT @Raghu__Charan: पतन का इससे बड़ा उदाहरण क्या होगा 85% हिंदुओ के बीच खड़ा मुसलमान उनकी बहन बेटियों की चड्डी का रंग बता रहा था और वो तालि…	HOF	HATE	hasoc_2020_hi_1714
1127611451332390912	RT @BhimArmyIN: गुजरात के मेहसाणा में एक दलित की घुड़चढ़ी के बाद पूरे दलित समुदाय को सामाजिक बहिष्कार का सामना करना पड़ रहा है. यही है गुज…	NOT	NONE	hasoc_2020_hi_2541
1127625821013676032	RT @OfficeofSSC: आज कांग्रेसी नेता मेरे घर आये किसानों की सूची लेके! सूची थी कृषि विभाग की, बैंक की नहीं थी। अगर कर्ज़माफी का सबूत ही दे…	NOT	NONE	hasoc_2020_hi_2539
1123640963790848000	RT @manakgupta: UN ये बैठक-घोषणा चुनाव के बाद नहीं कर सकता था? कौन-कौन ये सोच रहा होगा 🤔 #MasoodAzhar	NOT	NONE	hasoc_2020_hi_3153
1127506623075844096	एक बात पुछनी है .... जब गाली देने का मन करे तो कांग्रेसियो को गरिया सकते हैं	HOF	PRFN	hasoc_2020_hi_4140
1123528598369869824	RT @hmalik_1220: @VINEET4BJP @ajitanjum असहमति हो तो विरोध कीजिए!! असहमति जता रहे हैं तो बेहुदा बता रहे हैं!! 😠😠	NOT	NONE	hasoc_2020_hi_3699
1127555688043929602	RT @GSatusingh: @INCIndia डिजिटल क्रांति की देन राजीव गांधी जी की, https://t.co/vqSF8EKSJU	NOT	NONE	hasoc_2020_hi_3229
1127749863376973825	RT @Rambabu7231: मुस्कुराहट की गजब बातें हो गई #लफ्ज़ की अजीब रिश्ता हो गया है अगर रिश्ते होता तो इजहार करता मोहब्बत बदनाम नहीं बेमिसाल कर…	NOT	NONE	hasoc_2020_hi_843
1127473832019677186	RT @abhishekprsnl: बादलो के नीचे से प्रतिभा पे छुप के हमला करने वाले दो शख्स।। https://t.co/RJXHEhXUW9	NOT	NONE	hasoc_2020_hi_3258
1123518871799861249	RT @Mayawati: और अभी हाल में इनका जनविरोधी अहंकार इतना सर चढ़कर बोला कि इन्होंने बंगाल में तृणमूल कांग्रेस के 40 विधायक तोड़कर ममता बनर्जी…	NOT	NONE	hasoc_2020_hi_3504
1123575620707819520	RT @ZeeNewsHindi: #BreakingNews: मसूद अज़हर अंतर्राष्ट्रीय आतंकी घोषित https://t.co/gfUtRWrNnZ https://t.co/N993pjrzT2	NOT	NONE	hasoc_2020_hi_4112
1127582766499893248	RT @narendramodi: मैंने यूपी की जनता से सवाल पूछा, आतंक को करारा जवाब कौन दे सकता है। जानिए जनता का मिजाज। https://t.co/juzx4tr6tr	NOT	NONE	hasoc_2020_hi_93
1127512004384575489	जैसे तारीख नजदीक आती। जा रही है इनके भी स्वर बदलते जा रहे है बधाई आज जाता को पता चला कि आप मीडिया वाले है @anjanaomkashyap @sardanarohit @RiituS @LambaAlka @RahulGandhi @keshavyadaviyc @KunalChoudhary_	NOT	NONE	hasoc_2020_hi_1488
1127516337100603392	RT @VinayDw86398158: सोनिया चर्च मे फादर किसी को सचिन हुआ,विराट, हुआ,धोनी, गौतम,युवराज, भज्जी हुआ मुझे पप्पू क्यों हुआ? फ़ादर - अब "हुआ तो…	HOF	OFFN	hasoc_2020_hi_3751
1127694485968678912	RT @Avinash78729927: @manishpune2000 @rishikeshlaw अरे भाई इन पांडु से क्या बात करते हो, ये लोग गन्ने को चूसकर फेक गए सिट्ठी है साले । इन क…	HOF	HATE	hasoc_2020_hi_2456
1127585744447426560	RT @DesiStupides: @dhruv_rathee 23 मई को भाजपा को 540 सीटें मिलेंगी लेकिन बादलों की वजह से दिखेंगी केवल 150. 🤣 🤣	NOT	NONE	hasoc_2020_hi_3781
1123763001251831808	RT @Aryavrta: #IndianJudiciaryAtStake आज न्यायलय में न्याय पाना मुश्किल हो गया हैं क्योंकि न्याय सरेआम बिक रहा हैं। सलमान खान,तरुण तेजपाल…	HOF	OFFN	hasoc_2020_hi_3909
1127569919313268736	RT @Prerna22845841: 💞रोशन है तेरे दम से मेरे इश्क का जहां जो बात तुझमें है वो किसी और में कहां💞 https://t.co/eoI73vK9Nd	NOT	NONE	hasoc_2020_hi_2255
1127468433946349570	नफरत फैलाने वाले को वोट मत देना, सीधे सीधे कह दीजिये की #dontvoteformodi जिसने काम किया उसे वोट दे , मतलब #Vote4Jhaadu #Vote4AAP	HOF	OFFN	hasoc_2020_hi_1568
1127573249594777600	चमचे आजकल पप्पू मूत्र पीना बंद कर दिए है क्योंकि आजकल पप्पू मूत्र के ट्वीट नहीं आ रही है मैंने सोचा चलो पूछ लेता हू 😂😂😂😂😂😂😂😂😂😂	HOF	OFFN	hasoc_2020_hi_3752
1127572234585776130	1984 में सिखों के साथ अत्याचार हुआ, कत्लेआम हुआ, ये कहते हैं- हुआ तो हुआ। भोपाल में हजारों लोगों को जहरीली गैस के हवाले कर दिया गया। इस पर भी ये यही कहेंगे- हुआ तो हुआ। 2014 से पहले इनकी तुष्टिकरण की नीति के कारण आतंकवाद ने हज़ारों जानें लीं।आज ये कह रहे हैं- हुआ तो हुआ: पीएम https://t.co/zTKVgVUWjk	HOF	HATE	hasoc_2020_hi_424
1127767684945367040	@Mdhaka5 अगर बालाकोट में नहीं निबटा हो @ManiShankarAiya तो आज अपनी मौजूदगी दर्ज करवाये। अभी चुनावों का अंतिम चरण बाक़ी है।	NOT	NONE	hasoc_2020_hi_1409
1127520535586361344	RT @dasraghubar: पिछले साढ़े चार साल में संथाल परगना ने तेजी से विकास किया है। गांव-गांव तक सड़क है, घर-घर में बिजली, शौचालय और गैस कनेक्शन…	NOT	NONE	hasoc_2020_hi_3167
1127763809421053952	RT @naijonam: कई बार सोचता हु की AAP से कुछ लोग बाहर ना जाते तो कितना अच्छा होता पर फिर ऐसे लोगों को भोंकते देखता हु तो सोचता हु अरविंद जी…	NOT	NONE	hasoc_2020_hi_169
1127642229118361600	RT @xOePHAgoruXzdpk: नजरे कर्म मुझ पर इतना न कर,💚💚💚💚 की तेरी इश्क में मैं बाघी हो जाऊ,💕💕💕 मुझे इतना न पिला इश्क ए जाम,💓💓💓 की मैं इस जहर की…	NOT	NONE	hasoc_2020_hi_2375
1127739721516441601	ऐसे चल रहा है हमारा चुनावी लोकतंत्र	NOT	NONE	hasoc_2020_hi_4335
1127570372314845189	मां' हर दुःख का इलाज है। दुनिया में ऐसी कोई समस्या नहीं, जिसका समाधान मां के पास नहीं। #HappyMothersDay @narendramodi #JitegaModiJitegaBharat @kavanmehta @thakor_ganapat @KalpeshRathavi @mit_chokshi @KuldeepSanghvi @inandlalpatel @m_borad @DineshSorathiy4 @NazlinShaikh @DrRutvij https://t.co/fGzKAJ7ZlG	NOT	NONE	hasoc_2020_hi_3377
1127567423736111104	RT @ShashiTharoor: वो साँस भी लेती है "थरूर" उसमे भी दुआएं होती हैं माँओं का तोड़ नही होता माएँ तो माएँ होती हैं #MothersDay https://t.co/K…	NOT	NONE	hasoc_2020_hi_2130
1127481469859966977	RT @ankur9329: प्रज्ञा दीदी ने हिन्दू होने की कीमत चुकाई है। आज आप हिन्दू होने की अर्थ बता दीजिए दिग्वविजय सिंह को।	NOT	NONE	hasoc_2020_hi_3993
1127602806880231425	नवजोत सिंह सिद्धू बोले - 'मोदी उस दुल्हन की तरह जो रोटियां कम बेलती है चूड़ियां ज्यादा खनकाती है'. तो मैं भी ये कहती हूँ की नवजोत सिंह सुद्धू उस हिजड़े की तरह है जो नाचता कम है और तालिया ज्यादा बजाता है.	HOF	OFFN	hasoc_2020_hi_3460
1123565843806167041	@squintneon @iBeingJaySingh @AisiTaisiDemo phele me samajta tha sab muslim aache hote he par ye sab bhsodiwale he	HOF	PRFN	hasoc_2020_hi_3803
1127464587769475072	ऊना में बंदरों के आतंक से लोग परेशा, ग्रामीणों ने सड़क पर दिया धरना #HimachalPradesh #HimachalNews https://t.co/UwhB2YsfA3	NOT	NONE	hasoc_2020_hi_202
1127605503801155585	@SwetaSinghAT अगर उस खिलाड़ी को मैच में खिलाया ही ना गया हो तो।😂	NOT	NONE	hasoc_2020_hi_3091
1127645462930944000	RT @SurgicalWay: @AzmiShabana ❤️ अच्छा है! इसी मिट्टी में मरेंगी तो हम #RIP वाला ट्वीट तो कर सकेंगे! फुक्रिया मोहतरमा, यहीं मरने की बात…	NOT	NONE	hasoc_2020_hi_918
1127583353685757953	RT @BundiAAP: "विपक्षी पार्टियों को हर तरफ से अपनी हार दिखाई दे रही है। जब कोई भी हथकंडे उनके काम नहीं आए तो उन्होंने चुनाव जीतने के लिए मे…	NOT	NONE	hasoc_2020_hi_2566
1123776842459242496	RT @anuragtamrakar6: बंगाल की भूतनी आज बहुत डर गई 🤣🤣🤣🤣 वीडियो जरूर देखें https://t.co/vJfWmDiqGn	HOF	OFFN	hasoc_2020_hi_2648
1127785774986907648	RT @LakhanKori6: #Ramzan2019 #RamadhanKareem मांस खाने का आदेश अल्लाह का नहीं है। हजरत आदम के शरीर में कोई पित्तर आ कर प्रवेश करता था। वही…	NOT	NONE	hasoc_2020_hi_1507
1123623842633502721	@sudhirchaudhary ये सभी जो घडियाली आंशु ट्विटर पर बहा रहे हैं । ये सब नाजायज पैदाइश हैं ।	HOF	OFFN	hasoc_2020_hi_4412
1123627906897301504	@sudhirchaudhary अरे भाई इनको मत कोसो ये लोग इसी की खाते है। कुत्ता मालिक के खिलाफ तो भोकेगा ही।	NOT	NONE	hasoc_2020_hi_3525
1127470703064707073	RT @BJPLive: कांग्रेस की पीढ़ियां गरीबी हटाओ की बात करती रही, लेकिन गरीबी हटी नहीं। अब राहुल जी भी वही बात कह रहे हैं, तो इनकी विश्वनियता क…	NOT	NONE	hasoc_2020_hi_3043
1127626135594909697	RT @JBMIS: हम बंगाल की डायन को भी दीदी कहते हैं। यह हमारा संस्कार है।	HOF	PRFN	hasoc_2020_hi_639
1127566618433703936	RT @SaintRampalJiM: ब्रह्म की पत्नी का नाम दुर्गा जी है ! #GodMessage https://t.co/xgc3NxzCzQ	NOT	NONE	hasoc_2020_hi_1271
1123508297963687937	RT @sambit_swaraj1: राहुल और प्रियंका का घर बिल्कुल अगल बगल है दोनों घरों में सिर्फ एक दीवार का अंतर है राहुल के घर में एक मुर्गा है जिसने…	NOT	NONE	hasoc_2020_hi_3023
1127778615318310912	RT @abhinav1857: आज मैंने #NOTA पर मुहर लगाकर इस आरक्षित लोकतंत्रीय व्यवस्था के खिलाफ अपने सवर्ण धर्म का पालन किया । जय हिन्द	NOT	NONE	hasoc_2020_hi_3387
1123826502993367040	RT @NaveenBhutani5: @ArvindKejriwal लल्ला हुआ नहीं कि हिजड़े बधाई देने पहले पहुँच जाते हैं! https://t.co/ViiJZYx8Bb	HOF	OFFN	hasoc_2020_hi_455
1127516433586384896	RT @UshaDassi: #ramadan2019 जहां संखों लहर मेहर की उपजै,कहर नहीं जहां कोई। दास गरीब अचल अविनाशी, सुख का सागर सोई।। असली भगति वेद शास्त्रों…	NOT	NONE	hasoc_2020_hi_397
1127513812108603393	@sardanarohit हिट्लर की औलाद दिल्ली की मेन स्ट्रीम मीडिया में कौन है सब को पता है Not a hitler #jhutler है	HOF	OFFN	hasoc_2020_hi_534
1127784491521462273	RT @CallGirlSonam: अच्छे लोगो का दिल #कमल जैसा होता है, कीचड़ में भी खिलता है ओर खुद पर एक बूंद कीचड़ की लगने नहीं देता। https:/…	NOT	NONE	hasoc_2020_hi_1860
1123802926819041285	RT @AlishaSays_: कितने लोग 23 मई को भाजपा के जाने का इन्तज़ार कर रहे है ? RT &amp; COMMENT...	NOT	NONE	hasoc_2020_hi_2604
1127586805618864129	RT @RoshanKrRai: " Itne cloud hai , baarish ho Rahi hai , ek benefit hai " 😂😂 https://t.co/8UIyDCQKbm	NOT	NONE	hasoc_2020_hi_2840
1127554085819838464	RT @pooja303singh: @ArvindKejriwal घुँघरू सेठ कोई नया पैंतरा दिखाओ ये पुराना हो गया 😂	HOF	OFFN	hasoc_2020_hi_4308
1123583149496082432	RT @BJP4India: एक-एक घुसपैठिये को मोदी सरकार चुन-चुनकर बाहर निकालने का काम करेगी: श्री @AmitShah #DeshBoleModiPhirSe लाइव देखें https://t…	NOT	NONE	hasoc_2020_hi_2432
1123616641017761792	@narendramodi https://t.co/g96yM5gBjY #चमचो तुम #फिरोज_खान के #वंशजों की गुलामी ही करते रहना पूरे #विश्व मे #मोदी_मैजिक चल रहा है #मसूद_अजहर_ग्लोबल_आतंकी_घोषित #आज_चमचे_सदमे में चले गए है, क्या #मोदी_जी है तो मुमकिन है। #अबकी_बार 400 #पार हर हर #मोदी घर घर #मोदी	HOF	OFFN	hasoc_2020_hi_3118
1127616476125569025	RT @SunitaRawat_: मैं 23 मई तक बीजेपी का विरोध देशहित में करुगी अगर किसी को भी मेरी ट्वीट से तकलीफ हो तो मेहरबानी करके तब तक मुझे ब्लॉक कर…	NOT	NONE	hasoc_2020_hi_4078
1127530551592738816	RT @KailashOnline: #MamataBanerjee का अराजक तंत्र !!! #WestBengal में आज चुनावी हिंसा ने सारे रिकॉर्ड तोड़ दिए! #BJP उम्मीदवार भारती घोष…	NOT	NONE	hasoc_2020_hi_1246
1127465451787669506	लोकतन्त्र के त्योहार मै वोट डालकर आया हू | मै फिर एक बार मोदी सरकार बनाने मै योगदान करके आया हू | #NarendraModi #chowkidarnarendramodi #chowkidarvijay #chowkidar https://t.co/bV005mfwsp	NOT	NONE	hasoc_2020_hi_2071
1123753819899297792	RT @MANOJTHANVI812: ऊं नमः शिवाय जय महाकाल हर हर हर महादेव	NOT	NONE	hasoc_2020_hi_1908
1127503410268385281	Thik hai https://t.co/mQL6Ysuh8S	NOT	NONE	hasoc_2020_hi_3250
1127526877365587968	RT @aagnihotri304: @virendersehwag @YUVSTRONG12 @harbhajan_singh @ImZaheer @ArvindKejriwal Isse behtar kar k dikhaiye @ArvindKejriwal https…	NOT	NONE	hasoc_2020_hi_3649
1123634861065945088	@sherryontopp तू मूर्ख है क्या ? चोरनिया के तलवे चाटने के बाद दिमाग खराब हो गया क्या ? ये वर्ल्ड हंगर इंडेक्स क्या पिछले 5 सालों में आया है बेवकूफ़ इंसान ?	HOF	OFFN	hasoc_2020_hi_342
1127559932700549122	RT @aapsukhpalsingh: मार मोहरिया तान के झाड़ू के निशान पे .. #Vote4Jhaadu @ArvindKejriwal https://t.co/izVGP3TaQM	NOT	NONE	hasoc_2020_hi_2915
1127714169824862208	RT @sexyswity94: मैं और मेरी दोस्त @ursrashi जब भी मिलते है तो ऐसे ही मज़ा करते है https://t.co/TkzT7WGjto	NOT	NONE	hasoc_2020_hi_2209
1127656569473097728	@AuditorOfSports 😁यदि ऐसी ही फ़िट्नेस व बैटिंग फ़ॉर्म मेंटेन रख पाए तो IPL2020 ही नहीं MS, T20वर्ल्ड कप भी खेलेंगे। https://t.co/8hZpznRyNn	NOT	NONE	hasoc_2020_hi_1200
1127572909864525824	RT @KushwahMadhavi: #मां हमारे पाप कर्मों को नहीं काट सकती https://t.co/W3Btmw0JCR	NOT	NONE	hasoc_2020_hi_1699
1127605013067395072	RT @Mohamma58796854: एक ही फिल्म में दो बार चोरी -1राफेल फाइल -2 EVM चोरी - समझ में नहीं आ रहा सरकार चला रहे हे या धूम 4 फिल्म 😝😜	NOT	NONE	hasoc_2020_hi_3734
1127576701536391168	RT @Megha15120179: #SundayMotivation दुर्गा देवी पुराण में दुर्गा अपनी भक्ति ना करने के लिए कह रही है वह केवल ओम की भक्ति करने के लिए कहती…	NOT	NONE	hasoc_2020_hi_3921
1127569462167724032	बिल्कुल सही बात इस बार फेकने में पकड़े गए😂😂	NOT	NONE	hasoc_2020_hi_4016
1123614464169766915	RT @yadavtejashwi: सही बोला, नीरव मोदी, ललित मोदी, रेखा मोदी, राजकुमार मोदी जैसे भगौडों को भगाने में किसी को तीन नहीं 30 जन्म लेने पड़ते ले…	NOT	NONE	hasoc_2020_hi_292
1127561329416400896	RT @Radhemeena78: कहीं पे निगाहें कहीं पे निशाना 😂😂😂😝😝 कुत्ते की पूंछ कभी सीधी नही हो सकती https://t.co/DuMalxsMBC	NOT	NONE	hasoc_2020_hi_716
1127479993435664384	RT @NehaBishwas: मीडिया वाले भी कम फ़िल्मी नहीं हो गए है...सवाल करेंगे जैसे सामने प्रधानमंत्री नहीं कोई बच्चा हो और जवाब ऐसे सुनेंगे जैसे…	HOF	HATE	hasoc_2020_hi_3182
1123480179320545280	@p_sahibsingh @TajinderBagga बिल्कुल सबूत मांगने वालों को सीमा पर खड़े कर देना चाहिए फिर लेंगे जितना सबूत लेना होगा	NOT	NONE	hasoc_2020_hi_1608
1127561677535305728	@yadavtejashwi ललुआ को साजिशन नहीं कानूनन बोल गधे , कानूनन ललुआ को लात मारकर जेल में ठूंसा गया है अब तेरा भी नंबर आने वाला है	HOF	OFFN	hasoc_2020_hi_492
1123511611430395904	RT @Sushil4JnpBJP: #बदलापुर #ग्राम_स्वराज_मंच की बहनो द्वरा #मतदाता जागरूकता रैली निकाली गई। रैली में उपस्थित बहनो को 12मई को होने वाले मत…	NOT	NONE	hasoc_2020_hi_2234
1127741860611407873	@Pandey__Pramod @RajeshR41677172 @AjayKushwaha_ @punit0022 @MukeshKumarJo15 @chetana816 हर हर महादेव	NOT	NONE	hasoc_2020_hi_3201
1127484347127177216	@nitishpoet *आबाद हो चुका हूँ, फिर से बर्बाद करना* ऐसा लिखते तो?	NOT	NONE	hasoc_2020_hi_3188
1127637615396528128	RT @SandeepMahule: काँग्रेस का कहना है कि वो सत्ता में आयी तो देशद्रोह कानून समाप्त करेगी क्यो समाप्त करेगी ??? क्योंकि काँग्रेस ही देश…	HOF	HATE	hasoc_2020_hi_2173
1123592200804126721	RT @onlytg_gt: @ANI #MasoodAzhar को अंतरराष्ट्रीय आतंकवादी घोषित कराने में नेहरू जी ने बहुत बड़ा योगदान दिया है आइए हम सब नेहरु को धन्यवाद…	NOT	NONE	hasoc_2020_hi_2669
1123667035584704512	RT @Dayalal41649609: @mayachauha मसूद को आंतरराष्ट्रीय आतंकवादी घोषित करने के बाद,विरोधियों को मार्केट में बरनोल नहीं मिल रही होगी !!	NOT	NONE	hasoc_2020_hi_3513
1123558231140208640	@ArvindKejriwal अबे गटर के कीड़े केजरीवाल तेरे बच्चे जो हैं उन्हें पैदा करने में भी मोदी जी का हाथ है फिर तो।	HOF	OFFN	hasoc_2020_hi_37
1123766692251865097	मोदीजी के डर से चीन के राष्ट्रपति ने RSS की सदस्यता ग्रहण कर दी। मोदी हैं तो मुमकिन है। सुना है 23 मई को @RahulGandhi @ArvindKejriwal @MamataOfficial भी RSS जॉइन करेंगे। 😊😊 https://t.co/uODUWOyPXN	NOT	NONE	hasoc_2020_hi_3366
1123624450820149249	@sonaliranade ask Mani Shankar aiyar	NOT	NONE	hasoc_2020_hi_3902
1127631428785725442	RT @_NafeesAhmad: @narendramodi एक भक्त मित्र जा रहे थे मैंने कहा सम्भल कर जाओ आगे डिवाईडर है बस भड़क गया कि तुम लोग मोदी को क्या समझ रखे…	NOT	NONE	hasoc_2020_hi_2030
1127609622611644417	RT @MLArajeshSP: मिश्रा जी कहिन 😂🤣👇👇 सर्जिकल स्ट्राइक करने में हमारे जवानों की सेफ्टी को लेकर बहुत शंका थी। काफी रिसर्च के बाद मैंने सुझाव…	HOF	OFFN	hasoc_2020_hi_2238
1127518220322258944	देश में चुनाव हो रहे है लेकिन केवल पश्चिम बंगाल में लड़े जा रहे है।	NOT	NONE	hasoc_2020_hi_203
1127605185029623808	@UrmileshJ दलाल मीडिया के कारण देश में नफरत फैल रही है	HOF	HATE	hasoc_2020_hi_1598
1127623639963062273	मोदी को India Divider in Chief घोषित एक पाकिस्तानी पत्रकार के बेटे और शांतिदूत सलमान तासीर नें किया जिस कवर फोटो के दम पर पिद्दी कूद रहे 😂 पाकिस्तान को मोदीजी नें जिस तरह बर्बाद किया उसकी करतूतों का फल दिया तो पाकिस्तानियों की ये हरकत बहुत स्वाभाविक है,लगे रहो😂😂😂 https://t.co/HG8RcXCTz8	NOT	NONE	hasoc_2020_hi_3840
1127590106502615040	RT @SunitaR67477606: तुझसे बात करने के बाद ऐसा सुकून मिलता है.. जैसे की लगता है दुनिया की सारी खुशी मिल गई.. https://t.co/q22CQCZMFI R…	NOT	NONE	hasoc_2020_hi_3030
1127771992508076033	RT @Ashfaqkotwal5: एयरस्ट्राइक के दिन अगर बादल नहीं बनते तो हमारे पास गटर गेस जलाके धुएं से बादल बनाने का मास्टर प्लान भी था 😜😜😜😛😛😛 😂😂😂😂😂😂…	NOT	NONE	hasoc_2020_hi_666
1127737028798377984	@narendramodi ईश्वर उनकी आत्मा को शांति दे .	NOT	NONE	hasoc_2020_hi_3328
1127584372901666818	@Yogita_singh11 @yadavdimples केमरा तो बहुत छोटी बात है ये तो चुनावी सभा में, हजारों की भीड़ के सामने ताली पीट पीट कर सफ़ेद झूँठ बोलते हैं, टेसुए बहा देते हैं और सबसे बड़ा झूँठ अपने आप को ख़ाकसार बनाने में भी शर्म नहीं आती।	NOT	NONE	hasoc_2020_hi_317
1127497995396820994	RT @RoflNana_: डाक्टर आप को डॉक्टर बन्ने के लिए प्रोत्साहित करेगा, इन्जीनियर, इन्जीनियर बन्ने के लिए, लेकिन जिसने 35 वर्षो तक भीख मांग कर…	HOF	OFFN	hasoc_2020_hi_257
1127591176075235328	@jehaadi_bakra @NobitaDuffer @thenarayan_ @MGNTheTwin @SabinaBasha Xआपकी बहन का बकरी बना के नियाग कर दिया आप हलाला में उलझे रहे मियां गान ऊची करो चूची नीची	HOF	PRFN	hasoc_2020_hi_2149
1127590291072897024	RT @RANAUTKANGNAHP: 23 मई के बाद अगर मोदी जी ने कह दिया🙂 " कि अब होगा न्याय " तो भारत के आधे से ज्यादा नेताओं की पतलून गीली हो जायेगी😂😁😂😃😜	NOT	NONE	hasoc_2020_hi_3094
1123481295034769408	RT @nawabmalikncp: आपातकाल में जो चीनी नागरिक बन भाग गया था चीनी है या नहीं बताता नहीं , @RahulGandhi जी की नागरिकता पर सवाल उठा रहा है, उ…	HOF	OFFN	hasoc_2020_hi_2216
1127774492313260037	, @INCIndia 1. 1984- हुआ तो हुआ 2. 1984-भगाया तो भगाया (भोपाल गैस) 3. 1986- गए तो गए (विराट पिकनिक) 4. 1988 - ली तो ली (बोफोर्स) 5. 1990- काटा तो काटा (कश्मीरी पंडित) 6. 2008- मरे तो मरे ( 26/11) 7. 2009-2014- लूटा तो लूटा (2G, Coal &amp; CWG) @ABHM4GUJARAT #HuaToHua	HOF	HATE	hasoc_2020_hi_1406
1127530232808857600	RT @JagratiGupta3: @ArvindKejriwal अगर ऐसा था, तो खुशियां मनाते😠 क्यों ट्वीट करके अपना समय बर्बाद कर रहे आप।।	NOT	NONE	hasoc_2020_hi_3050
1127570288428797953	@Iyervval @ARanganathan72 कॉमरेड़ आनंद को लाल सलाम 🤺	NOT	NONE	hasoc_2020_hi_3746
1127603981264384001	RT @AmitShah: Divide and Rule का इतिहास कांग्रेस का रहा है। Divide and Rule तब हुआ जब कांग्रेस ने अपने वोटबैंक के लिए हिंदू आतंकवाद की फ़…	HOF	HATE	hasoc_2020_hi_164
1127519122114453505	15 साल से बंधक युवती को छुड़ाया, खौफनाक है कहानी https://t.co/wPF4jeFcR9 via @aajtak	NOT	NONE	hasoc_2020_hi_3227
1127645039318822912	@AmbaniHu Gand me daal chutiya... https://t.co/9dN2WgC2W5	HOF	PRFN	hasoc_2020_hi_1994
1127526172743462912	RT @TheLallantop: PM @narendramodi ने बादलों से पाकिस्तानी रडार को चकमा दिलवाया फिर मज़ाक उड़वा बैठे. TV चैनल को इंटरव्यू में बता रहे थे ए…	NOT	NONE	hasoc_2020_hi_3009
1127633899264208896	@ankurdh Shukr hai	NOT	NONE	hasoc_2020_hi_3747
1123601415681630208	@aajtak @Pkhelkar जरा लोकपाल क्यों नहीं नियुक्ति किया मोदी जी ने इस पर भी पूछ लेते।	NOT	NONE	hasoc_2020_hi_2690
1127483592152453120	नेहरू से लेकर राजीव तक सब बिना मेहनत के प्रधानमंत्री बने थे केवल पप्पू की ही किस्मत खोटी निकली 🤣🤣😂🤣😂	HOF	OFFN	hasoc_2020_hi_3264
1127796621469573120	RT @Marwadi29: ये नागमणि लेकर रहेगा..🤣 . https://t.co/geC8NMhcpn	NOT	NONE	hasoc_2020_hi_1075
1123806592640724998	RT @AsaramBapuJi: विषय सुख की लोलुपता आत्मसुख प्रकट नहीं होने देती। सुख की लालच और दुःख के भय ने अन्तःकरण को मलिन कर दिया है। तीव्र विवेक-…	NOT	NONE	hasoc_2020_hi_2692
1127599996705083392	@INCUttarPradesh @IncNiku अब की बार न्याय वाली सरकार	NOT	NONE	hasoc_2020_hi_3824
1127461056152911872	RT @BJP4India: जब इन्हें मौका मिला, तो इन लोगों ने अपने लिए लाखों-करोड़ों के बंगले बना लिए। जब मुझे सेवा का अवसर मिला तो मैंने मेरा बंगला…	HOF	HATE	hasoc_2020_hi_1835
1127562994555150336	RT @NuhCongress_SC: लोकतंत्र का पर्व मतलब चुनाव हैं। मैं इस चुनाव का हिस्सा बन देश को मज़बूत बनाने के लिए अपना वोट #कांग्रेस को कर आया हूँ।…	NOT	NONE	hasoc_2020_hi_958
1127472103974825984	RT @myogiadityanath: जिसने औरंगज़ेब की तरह पिता को ही अपदस्थ कर दिया, उनके साथ हाथ मिलाया जिनको फूटी आंख नहीं सुहाते थे, 23 मई के बाद जो फि…	NOT	NONE	hasoc_2020_hi_1685
1127781110925201408	मतलबी दुनिया में लोग अफसोस से कहते है की, कोई किसी का नही…? लेकीन कोई यह नहीं सोचता की हम किसके हुए…...... @ Nahri https://t.co/kDGukpljwp	NOT	NONE	hasoc_2020_hi_3795
1123775269586853888	चीन ने घुटने टेके मसूद अज़हर इन्टरनेशनल आतंकी घोषित अब क्या करेगी कोग्रस मोदी है। तो सब मुमकिन है। अच्छे दिन	NOT	NONE	hasoc_2020_hi_2596
1127542882846400512	RT @pokershash: @RanaAyyub कौन बना रहा यह सब 😣 https://t.co/1z9v6RttAq	NOT	NONE	hasoc_2020_hi_350
1123531291129929729	भूखा मर गया बहादुरी बिना दिखाये रावण का साथ भी मिल गया था अब बस केवल रोने वालो की औकात देखना हाय सब मोदी ने कर डाला	NOT	NONE	hasoc_2020_hi_945
1127787536590331905	RT @bpjIndia: DD:गुड न्यूज इंडिया में आज आपको मिलवाते हैं कुछ ऐसे युवाओं से जो देश से भुखमरी खत्म करने का सपना संजोए हैं, इसके तहत युवाओं…	NOT	NONE	hasoc_2020_hi_4162
1127777738687795200	@Jetha_Live जिसके खुद के घर शीशे के होते है, वो दुसरो के घरों में पत्थर नी मारा करते 😜😜😜😂😂😂	NOT	NONE	hasoc_2020_hi_4373
1127640605935456258	@ArvindKejriwal Matlab aap ko vote nahi Dena hai	NOT	NONE	hasoc_2020_hi_1195
1127599614989717504	RT @KGalouri: #SaturdayMotivation कबीर साहिब ने लाखों लोगों के बीच एक मरी हुई लड़की को जीवित किया उसका नाम कमाली रखा पूर्ण परमात्मा सब कुछ…	NOT	NONE	hasoc_2020_hi_3853
1127589913564798976	@YearOfRat घर का ना टाटा स्काई का	NOT	NONE	hasoc_2020_hi_731
1127744062637969408	अगर बारिश हो रही हो और बादल छाए हो तो रडार विमान की स्थिति का अंदाजा नहीं लगा सकता नाली से गैस वाले "महान वैज्ञानिक मोदी" 😝😜	HOF	PRFN	hasoc_2020_hi_1483
1127752799368794113	इस्लामिक आतंकवाद को छुपाने के लिए किस प्रकार कांग्रेसी डायन ने हिन्दूओं को आतंकवादी घोषित करने का षड्यंत्र रचा, तथ्यों के साथ खुद देखिए... और निर्णय लीजिए कि आप झूठे और अधर्मी कांग्रेसी मानसिकता के साथ हैं या सत्य और धर्म के साथ @rajnathsingh @RahulGandhi @Hitler_Sona @Silpiii https://t.co/Ey1eM2LsDj	HOF	HATE	hasoc_2020_hi_2141
1127768288933466112	@chulbulThurram सोचिये 1988 में डिजिटल कैमरा यूज़ करने वाले मोदी जी कितने गरीब हुआ करते होंगे। कुछ तो फ़कीरी हैं मोदी जी में।	HOF	OFFN	hasoc_2020_hi_3728
1127763889104384008	RT @HarishKhuranna: .@ArvindKejriwal का अभी तक चुप रहना दिखाता है की चोरी पकड़ी गयी। हर बात पर ट्वीट ट्वीट करने वाले केजरीवाल की चुप्पी बहु…	HOF	OFFN	hasoc_2020_hi_374
1127566417073586177	@kanpur62 Itti जल्दी थोड़ी मरेगा बुड्ढा	HOF	OFFN	hasoc_2020_hi_2645
1127644338861641728	RT @FunKeyBaat: "उंगली माल डांकू" और इस "उंगली मार ढांकन" में क्या फर्क है ? https://t.co/64RDfSyTt6	NOT	NONE	hasoc_2020_hi_1988
1123677701682937856	@Shivaay__ मुस्कराने की सजा दे गए	NOT	NONE	hasoc_2020_hi_990
1123547862816550912	Salil Chaturvedi commented: '"जब मैंने वहां जाकर आतंकवादियों को मारा"ये जूमलेबाज़ चौकीदार गया था पाकिस्त...' https://t.co/Y8h3pnVuRf	HOF	PRFN	hasoc_2020_hi_3512
1127628912219963392	रसीले स्तन वाली घरेलु भाभी काकामुक नंगा बदन😍😍😍 https://t.co/tpxW0wYRSw	HOF	PRFN	hasoc_2020_hi_1558
1127619756037529601	@Mayawati मुसलमान को भी अपील कर दो, किसे वोट देना है	HOF	HATE	hasoc_2020_hi_3063
1127621316322791424	RT @OfficeofSSC: कांग्रेस ढिंढोरा पीट रही है कि किसानों का और मेरे भाई का भी कर्जा माफ कर दिया। मैंने अपने भाई से पूछा, तो उसने कहा कि मैं…	HOF	OFFN	hasoc_2020_hi_2178
1123516216797122561	@ArvindKejriwal आपको जिस एरिया मैं चप्पल रसीद हुआ था वो शायद एरिया ही नही जगह भी याद होगा ठीक उसी तरह पाकिस्तान को पता है मोदी सरकार फिर बन रही है तो पानी में रहनेवाले मगरमच्छ से बैर नही करते	NOT	NONE	hasoc_2020_hi_3808
1123630167652331520	UNSC के द्वारा आतंकी मसूद अजहर को global terrorist घोषित किए जाने पर अब हो सकता है कई लोग इसे भी BJP की चाल बता दे। हो सकता है कि ये लोग पूछ ले कि चुनाव दौरान ही क्यों UNSC ने ये घोषणा कि। अपनी आदत से बाज थोड़ी ना आयेंगे ये। #BJP4India #beatAjhar ##BeatTerror #BeatPakistan #Badla	HOF	HATE	hasoc_2020_hi_2093
1127474553444237312	RT @STFUIndianMedia: राजनैतिक लाभ उठाने में रह न जाए कोई कमी, इसके लिए हर किस्से को बनाते हैं झूठ की सर जमीं। #ShutTheFakeUp https://t.co…	NOT	NONE	hasoc_2020_hi_1257
1127603708651393024	RT @pradeep3006423: यह अंगुली में स्याही नहीं, स्याही में अंगुली करके आये हैं| वोट देने के पश्चात भी देखो, कांग्रेसीयों के चेहरे तक उतर आ…	NOT	NONE	hasoc_2020_hi_2637
1123544595441147905	RT @RubikaLiyaquat: “पड़ोसी मुल्क एक कमज़ोर सरकार के इंतज़ार में है। आतंक के लिए रोड पर लिखी बात फ़िट बैठती है सावधानी हटी दुर्धटना धटी”…	NOT	NONE	hasoc_2020_hi_786
1127608364324704261	RT @WesternRly: अनारक्षित टिकटों की बिक्री के लिए पश्चिम रेलवे द्वारा JTBS (जन साधारण टिकट बुकिंग सेवा) नियुक्त किये गए हैं। यह सुविधा नि…	NOT	NONE	hasoc_2020_hi_774
1127472699574444032	अब मेरे साथ ऐसी कोई अनहोनी हो इससे पहले मैं इस बोझ से छुटकारा पाना चाहता हूँ, आज नहीं तो कल इसकी शादी करनी ही है! मैं तो ये जवाब सुन कर सोच मे पड़ गया! अब मैं किसे गलत कह सकता हूँ?? लड़की के बाप को जो अपनी इज्जत की चिंता कर रहा है? या उस लड़की को जो‌ मोहल्ले के लड़के संग भाग गई?	NOT	NONE	hasoc_2020_hi_4114
1127572649817731072	RT @iPoojaSaini: गद्दार नहीं खुद्दार चाहिये, कमजोर नहीं दमदार चाहिये! तुम्हें मुबारक वंशवादी शहजादे, हमें तो अपना "चौकीदार" चाहिये!	NOT	NONE	hasoc_2020_hi_1114
1123661268416466944	RT @upadhyay_richa: राहुल गाँधी का रोड शो... अरे कोई खिड़की से भी तो देखलो कम से कम ! 😁😁😁😁 https://t.co/IfJLTajxEq	NOT	NONE	hasoc_2020_hi_1861
1127622381667635200	RT @PihuTyagi_: लोगों के काम आते रहिये क्योंकि ,क़ुदरत का एक उसूल है कि... जिस कुंए से लोग पानी पीते रहे ,वो कभी सूखता नही है ...!!…	NOT	NONE	hasoc_2020_hi_2034
1127638202615877633	@iamuttamsaran @Garvita1012 अरे भाई अब बेईमानी पे आ जाएंगे तो जीतेंगे ही,जब आकाश अम्बानी यकीन ना कर पाया😂😂😂	HOF	OFFN	hasoc_2020_hi_1953
1127513904387461121	RT @IBpraveen7: अरे वे बेशर्मो के टोली तेरा सृजन चोर बालिका गृह बलात्कारी सब के हाल पूछ बिहार वाशियों ने क्या हश्र किया है तो जो अपना हॉस्…	HOF	OFFN	hasoc_2020_hi_2421
1127794499126607872	RT @Kirtishbhat: ये इंटरव्यू लेने वाले जब ब्रेक लेते है उस वक़्त बाथरूम में जा जाकर हँस कर आते होंगे.	NOT	NONE	hasoc_2020_hi_1042
1127468861773701120	@PGauriTiwari1 उसकी ही पहचान हूं वो जिसने मुझे नकारा नहीं वो जिसने मुझे अपनाया है वो औरत है एक मां मेरी मां! वो कहती है जिंदगी हूं मैं उसकी अभिमान हूं मैं उसका वो औरत कोई और नहीं वो है एक मां मेरी मां!	NOT	NONE	hasoc_2020_hi_4386
1127744956007796736	RT @shukdeo_pandey: *वो कागज की दौलत ही क्या *जो पानी से गल जायेऔर *आग से जल जाये दौलत तो दुआओ की होती हैं * न…	NOT	NONE	hasoc_2020_hi_1839
1127553775445716993	आपको देखकर लगता हैं मोटा होना भी बीर नहीं हैं ..☺️ @Radhika_Khera जी	NOT	NONE	hasoc_2020_hi_1487
1127491997567033344	RT @MajorPoonia: यह भोली भाली बुलबुल कहती थी “हम जात पाँत धर्म की राजनीति नहीं करेंगे,हम देश की राजनीति बदलने आये हैं” । हे मेरे मालिक,कित…	NOT	NONE	hasoc_2020_hi_3253
1127494501545627648	Lalu??? Jisko log sabse ghatiya samajhte hain wo sbse tolerant hai😊	NOT	NONE	hasoc_2020_hi_528
1127750970648268801	RT @cgalgale1: दौर-ए-इलेक्शन में कहाँ कोई इंसान नजर आता है। . कोई हिन्दू, कोई दलित तो कोई मुसलमान नजर आता है। . बीत जाता है जब इलाको से इले…	NOT	NONE	hasoc_2020_hi_2277
1123823248230244357	RT @GaurangBhardwa1: गेम ऑफ थ्रोन्स में घापघाप देख लेंगे, व्हाट्सएप पर पोर्न देख लेंगे लेकिन ट्वीट में जरा सी अश्लीलता हुई तो ऐसे साधु ब…	HOF	PRFN	hasoc_2020_hi_555
1127815726520127488	मोदी है तो सब मुमकिन है	NOT	NONE	hasoc_2020_hi_1444
1127630921270607877	जिस प्रकार से देश में दलितों एवं मुस्लिमों पर अत्याचार हो रहा है इससे साफ पता चलता है कि भाजपा एक दोगली राजनीतिक पार्टियों में अव्वल है ।	HOF	HATE	hasoc_2020_hi_1852
1127533726693347330	बंगाल में हिंसा रुक नहीं रही,TMC के गुंडों ने चुनाव के दिन भाजपा के 2 कार्यकर्ताओं की हत्या कर दी,जहां की मुख्यमंत्री खुद हत्याएं करवा रही है,जरा सोचो वहाँ लोग किस हाल में जी रहे होंगे !! सुनलो ममता सत्ता क्या तुम्हें तो नर्क में भी जगह नहीं मिलेगी !! #VotingRound6	HOF	HATE	hasoc_2020_hi_2759
1127812706604539904	@BKaurDeep मोदी ने IPL का कप धोनी से छीन कर अम्बानी की झोली में डाल दिया-- राहुल 😂😂😂😂😂	NOT	NONE	hasoc_2020_hi_927
1127572951815950336	RT @N75875235: 🌪👕 कल आँधी में एक टी-शर्ट मेरे घर आकर गिरी है.. सोच रही हूँ जीन्स ले लूँ.. 🤔👖 या.. अगली आँधी का इंतज़ार करूँ ?!!😜 😂😂😂	NOT	NONE	hasoc_2020_hi_1989
1127760017757577216	@Roxky14 @LostMystic_ मैं सेक्यूलर नहीं हूँ मैं धर्मपरायण हूं , मैं धर्मनिपपेक्ष नहीं हो सकता! मैं सनातन धर्मी हूं, मेरी संस्कृति हिंदू है! भारतवर्ष मेरा राष्ट्र है, मुझे अपना धर्म व संस्कृति, भाषा व राष्ट्र से प्रेम है ! ये सारी बाते हमे अपनी धर्म पालन से ही मिलती है !	NOT	NONE	hasoc_2020_hi_2874
1127464650679783425	@kottayimavoor दिल्ली वालो आप के सातों को हरा दो ये कजरी के सपोर्टर हारने चाहिए	HOF	HATE	hasoc_2020_hi_2958
1127509533927124992	@ANI आज मतदान जरूर करे। चाहे BJP को करो, चाहे मोदी जी को करो, चाहे कमल को करो, पर मतदान जरूर करें।😂	NOT	NONE	hasoc_2020_hi_2890
1127541620348375041	RT @Krutika202: आज कल बच्चें 98.99% लाकर नॉर्मल घूम रहे हैं... . . . . मेरे एक बार 51% आये थे, मैंने लोगो से 15 दिन सीधे मुँह बात नही…	NOT	NONE	hasoc_2020_hi_2512
1127771866674782208	Sant Shri Asaram Bapu Ji स्वास्थ्य रक्षा के युक्तियाँ बताते हुए कहते हैं कि ग्रीष्म ऋतु में तली हुई चीज नहीं खाना चाहिए, अदरक, लालमिर्ची, खट्टी लस्सी, दही बहुत नुकसान करती है। #SummerHealthTipsByBapuji https://t.co/ARG6fzOtf9	NOT	NONE	hasoc_2020_hi_3155
1127760810514604032	@shaheen916 @NewsNationTV वालो फैक्ट चेकर साथ मे रखा करो । गोभी "G" ने तो तुम्हारा भी सूतिया बना दिया 😂😂😂😂	HOF	PRFN	hasoc_2020_hi_348
1127534326478823424	RT @drsinghshalini: *कर्म करो तो फल मिलता है,* *आज नहीं तो कल मिलता है।* *जितना गहरा अधिक हो कुँआ,* *उतना मीठा जल मिलता है ।…	NOT	NONE	hasoc_2020_hi_2770
1123653240510238720	@ZeeNewsHindi कन्हैया देशद्रोही है गदार हैं नाजायज है	HOF	OFFN	hasoc_2020_hi_2351
1127609219962867713	बहन चोद नौकरी करने दिल्ली आते हैं और ग्यान चोदेंगे बड़ी बड़ी... दो कौड़ी की रद्दी की औकात नहीं है. इनकी सालों को बंगाल में गाड़ देना चाहिए बेटीचोद	HOF	PRFN	hasoc_2020_hi_3109
1123534600410517504	RT @AshokTanwar_INC: आज अर्नियांवली से राजेन्द्र डूडी, सुनील कुमार सैनी और मेहनखेडा से भाल सिंह, वीरभान सरपंच, ओमप्रकाश पूर्व सरपंच, जोडि…	NOT	NONE	hasoc_2020_hi_2308
1127544304703025153	@irobertvadra Sun-in-Law of Nehru-Gandhi family doesn't know the National Tri-Colour of India! और जमाई राजा आ गये देश की नागरिकता का हक जताने. पप्पू का साला झप्पू। कोई इन्हे नॅशनल फ्लॅग दीखादो। एक बात सही है पप्पू को जमाई राजा भी टक्कर का मिला है।	HOF	OFFN	hasoc_2020_hi_3274
1127593742989516801	RT @satyarth23: 35 साल तक भीख मांगने वाला फकीर पिछले 5 वर्षों में 2500 रैलियां कर चुका है, 84 देशों की यात्रा कर चुका है और औसतन 2 लाख कीमत…	HOF	OFFN	hasoc_2020_hi_4043
1123615072360681472	@Shreedha__ मेरी रात... क्या कहूँ समझ नहीं आ रहा	NOT	NONE	hasoc_2020_hi_3314
1127536754980843520	RT @BJP4India: भोपाल में हजारों लोगों को जहरीली गैस के हवाले कर दिया गया, कई पीढ़ियों को बर्बाद कर दिया गया, इस कांड के गुनहगार को सरकारी…	NOT	NONE	hasoc_2020_hi_2425
1127608678914199552	@aajtak अगर कॉंग्रेस हार गयी तौ तू मर जाएगा	HOF	OFFN	hasoc_2020_hi_1967
1123562035353014272	RT @INCIndia: 2019 के चुनाव में कांग्रेस पार्टी मोदी को हरा रही है। मोदी जी ने कांग्रेस मुक्त भारत की बात कही थी, क्योंकि उनको डर है कि उन्…	NOT	NONE	hasoc_2020_hi_446
1127602278397911040	@aajtak भैया कौन सी पार्टी के नेता बनाओगे यह भी तो बताओ	NOT	NONE	hasoc_2020_hi_3668
1123637318936449024	@INCIndia चुप	NOT	NONE	hasoc_2020_hi_2763
1123475364284596224	RT @Aastha9305: बनारस से भी ज्यादा दिलचस्प सीट भोपाल है। क्यों कि यहां.. "भगवे" का मुकाबला "भड़वे" से है।🤣🤣	HOF	PRFN	hasoc_2020_hi_175
1127614135674400768	RT @Raghu__Charan: मरी हुयी दादी की नाक वोट बटोरने के लिए इस्तेमाल किया जा सकता है,पर मरे हुए घोटालेबाज और कातिल बाप का इतिहास याद दिलाना…	HOF	HATE	hasoc_2020_hi_344
1127779227665817600	RT @Ra_Bies: Fixed it: अरे भाई @ArvindKejriwal, मेरी सेहत को ले कर क्यूँ ग़लत अफ़वाहें फैला रहे हो? अगर कोई काम नहीं हो तो आ जाओ भोजन पर।…	NOT	NONE	hasoc_2020_hi_2094
1127551380493721600	RT @aayushsaran: @ArvindKejriwal बुज़र्गों के प्रति केजरीवाल की इज़्ज़त भावना देख कर अन्ना हज़ारे निहाल हो गए 😂😂😂😂 @SheilaDikshit @ArvindK…	HOF	OFFN	hasoc_2020_hi_1762
1127655990659141632	RT @TheYadavPrince: कांग्रेस कहती हैं "हुआ तो हुआ" जनता कहती है "Enough Is Enough" #MeraVoteModiKo https://t.co/whOJhIiHa1	NOT	NONE	hasoc_2020_hi_1612
1127629868512960512	RT @VinodDa70928948: आज ही के दिन ही लोकतंत्र की हत्या कर दी गयी और देश के संविधान की धज्जियां उड़ा दी गयी। इसलिए इस दिन को हम #TheBlackDa…	NOT	NONE	hasoc_2020_hi_281
1127474733782462464	RT @narendramodi: हरियाणा का शायद ही कोई ऐसा घर है, जो अपने बच्चों को देश की सेवा के लिए न भेजता हो। यही वजह है कि सशस्त्र बलों का लगातार…	NOT	NONE	hasoc_2020_hi_1683
1123539893617958912	@saurabhtop आपके कार्यकर्ताओं पर गुंडैती का आरोप लगता है और उनको लेकर लोगों में एक डर का माहौल रहता है ऐसा क्यों? दूसरा आपकी सरकार में एक जाति को लेकर तुष्टिकरण का दोष क्यों लगता है? तीसरा आपके कार्यकर्ता सड़कों साथ लेने की अपेक्षा नाकारात्मक राजनीति क्यों करते हैं?	NOT	NONE	hasoc_2020_hi_4077
1123607270930042881	@Akhter028 आलिया ने कॉपी कर ली🙄😂😂😂😂😂😂😂	NOT	NONE	hasoc_2020_hi_1896
1127500860106264577	@Raghavbhartendu @AsYouNotWish @BlrCityPolice माहौल को हल्का बना रहा हूँ प्रभु, बाक़ी पुलिस अपना काम करेगी	NOT	NONE	hasoc_2020_hi_7
1123639843911655425	RT @abhisar_sharma: चुनाव आयोग का मोदीजी के सामने नतमस्तक होना, राहुल गान्धी की नागरिकता का मुद्दा उठाना और yeti भी आ गया अब तो। देखिये। न्…	NOT	NONE	hasoc_2020_hi_577
1123622135551877120	RT @sambit_swaraj1: मसूद अजहर के आतंकी घोषित होने के बाद अब कन्हैया को देश द्रोही घोषित कर देना चाहिए या नही???? मेरा जबाब हाँ कर देना…	HOF	OFFN	hasoc_2020_hi_1392
1127497441761120257	@TajinderBagga एक बच्चा भी जानता है कि क्या करना है!!! So cute!!! #BJP https://t.co/rOSpTTteKx	NOT	NONE	hasoc_2020_hi_3533
1127804850706608128	हिमाचल की जनता की जान है, विकास का दूसरा नाम है, @ianuragthakur हिमाचल की आन बान शान है । #Shah4ModiAnurag https://t.co/YuzILFKEEZ	NOT	NONE	hasoc_2020_hi_2292
1.12766e+18	Khal drogo is savage af 👅 i ship him w khaleesi	HOF	PRFN	hasoc_2020_hi_3805
1127474054313721856	@Devanan61631399 🙏🙏हा अफसोस है मुझे भाई 🙏🙏 पर जिस नारी की आबरू दरिदो द्वारा लुटी गई उस नारी पर टवीट के माध्यम से एक नारी उसका अपमान करे जाति धर्म की राजनिति करे यह नारी के लिये जायज है क्या भाई बताओ ??	NOT	NONE	hasoc_2020_hi_2148
1127511865951571968	@ReallySwara @raghav_chadha @AAPDelhi बिल्ली के भाग से छींके नहीं टूटते! स्वरा की बात का भरोसा नहीं करते. --- इसकी तो जमानत जब्त हो जायेगी ----- 😂😂😂😂	HOF	OFFN	hasoc_2020_hi_2284
1127560381474304000	ये बहुत निंदनीय है इसपे कोई करवाई होनी चाहिए	NOT	NONE	hasoc_2020_hi_2267
1127508166575411200	RT @AAPExpress: " मैंने उस पार्टी को वोट दिया जिसने दिल्ली के लोगों के लिए काम किया. देश में ज़हर घोलने वालों और दिल्ली का विकास रोकने वा…	NOT	NONE	hasoc_2020_hi_1236
1127539472877309952	आईने के सौ टुकड़े करके हमने देखे हैं😑, फ़िर???😣 . . . . फिर क्या😁😁... माँ से मार खाई और खुद ही इक्कट्ठे करके फेंके हैं😅😂🤣	NOT	NONE	hasoc_2020_hi_2092
1123774338442899456	ॐ श्री अनंत हरि प्रकाशात्मा	NOT	NONE	hasoc_2020_hi_2802
1127561375545344000	RT @author_deepak: आपको सिर्फ़ फ़ोटो देखकर तकलीफ़ हो रही है। उस परिवार के बारे में सोचिए जिसकी यह लड़की माँ, बहन, बेटी या बहु रही होगी। ख़ब…	NOT	NONE	hasoc_2020_hi_1857
1127621932902494210	@BJP4India जब आप गए तो आप सही ओर जब सिद्धू गए तो वो देशद्रोही!!! क्या गजब बात है!	HOF	OFFN	hasoc_2020_hi_806
1127479167191113728	RT @narendramodi_in: कोई कोयला खाएगा, कोई टेलिफोन में घोटाला करेगा, कोई सेना के साजो सामान में लूट करेगा। यहां तो ऐसे लोग हैं जो ईंट-पत्थर…	HOF	OFFN	hasoc_2020_hi_3078
1123520474028232705	RT @rafatalam100: बेवफा राजनीति का ईंधन बनने वालो! अपनी कटी जेबों पर भी नजर डालो बेरोजगार औलादो के चेहरे देखो और करो हिसाब यह जात धर्म का…	NOT	NONE	hasoc_2020_hi_3708
1123751089424216065	RT @PreciousBaatein: दिल चाह रहा है कि किसी का breakup करवा दूँ 😉 फिर उसकी sad शायरी पर वाह वाह करुँ 😂😂😂	NOT	NONE	hasoc_2020_hi_1951
1127616979404087296	कुत्तों के भौंकने से हाथी रास्ता थोड़े ही बदल देता है।न कुत्तों की परवाह करता है।	NOT	NONE	hasoc_2020_hi_1181
1127815692944756737	भारत प्रज्ञा के रंग मे रंग चुका है आप चाहें या ना चाहे . यह देश अब इसी रास्ते पर चल पङा है	NOT	NONE	hasoc_2020_hi_4176
1127815089002881024	@yadavtejashwi My vote tejasvi bhaiya	NOT	NONE	hasoc_2020_hi_3266
1127525912696647680	@nitinurpal @HasanSafin @Singhh_Rashu @raghav_chadha भाई यह देखो तेज़ धूप के बावजूद AAP के कार्यकर्ता डटे हुए हैं, जबकि भाजपा और काँग्रेस वाले टेबल छोड़कर भाग चुके हैं । क्यों झूठ फैला रहा है भाई, आजा अभी यहाँ https://t.co/IxC6RgcXhz	NOT	NONE	hasoc_2020_hi_676
1127774802712748032	RT @Diva_Rizvi: बग्घे, आओ कभी अपनी नीच मण्डली लेकर बंगाल! संघियों की सेवा करना बंगाल वालो को खूब आता है अभी कल ही एक बलात्कारी भाजपाई को पे…	NOT	NONE	hasoc_2020_hi_1996
1127515070433333248	RT @Rofl_Vishvas: @DrKumarVishwas पालित ट्विटर लिलिपुट गैंग फ़ेक ID से ख़ुद सर जी को गालियाँ दे कर frustation निकालती फिर, हराम में मिले Bl…	HOF	PRFN	hasoc_2020_hi_260
1127640408794619904	@Meenakshi7771 कपड़े तुम कहा देखने गई । वैसे गरीब माँ के बेटा कपङे पहनता है तो तुम अमीरजादों को जलन होती है न ।	NOT	NONE	hasoc_2020_hi_2265
1127602894969065472	2014 में मोदी ने जनता से वोट मांगा था और आज जनता मोदीजी के लिये वोट मांग रही है। कांग्रेस ने 55 साल राज किया फिर भी खुद प्रचार कर रही है मोदी जी ने सिर्फ 55 महीने काम किया पर प्रचार जनता कर रही है	HOF	HATE	hasoc_2020_hi_1777
1123616641009442816	RT @SengarAjay505: @ANI कोई दिक्कत नही, दीदी का चुनाव भाजपा का हर कार्यकर्ता लड़ेगा और जीतेगा भी	NOT	NONE	hasoc_2020_hi_663
1123573334837465088	RT @inc_sweety: जब नंदी को पता चला की उन्हें भाजपा की रैली में ले जाया जा रहा हैं तो वो कैसे भड़क गए। जबकि नंदी महाराज की सहमति शिव जी को…	NOT	NONE	hasoc_2020_hi_3110
1123521782621900801	RT @mayurii___: इश्क जब तू ग़ालिब हुआ , समझो तब से वो हकीम हुआ ....।।	NOT	NONE	hasoc_2020_hi_3288
1127755424999059456	Anu52318905 Hai	NOT	NONE	hasoc_2020_hi_2023
1127478152144375810	@BJP4India इसमें कोई दो राय नही है अभी भ्रष्टाचार के खिलाफ और कड़े कानून बनाये जाने चाहिए	NOT	NONE	hasoc_2020_hi_28
1127533194000125953	@AMISHDEVGAN @News18India @GDuttTweets @sambitswaraj @CNBC_Awaaz पत्रकार नहीं बीजेपी चमचा है, दिमाग में कीचड़ है इसी लिए इसे लगता है कमल खिला है |	HOF	HATE	hasoc_2020_hi_109
1123573158659760129	RT @Raabta__: चिंगारियां भडक रही हैं हस्तिया उज़ड रही हैं किस शहर का नाम बताऊ तुम्हें यहाँ तो हर लम्हा एक ज़िन्दगी बिखर रही हैं	NOT	NONE	hasoc_2020_hi_448
1127762878302277632	@Priyankajit भाजपा का यह ढंग है 100 में से 90 बेईमान फिर भी भारत देश महान	HOF	HATE	hasoc_2020_hi_2797
1123590544066846720	RT @tanhadil1981: @ArvindKejriwal सड़जी😂🙏एक बात कहें😎आप इन बकचोदियो मे ही खत्म हो लिये हो😏2014 में कितनी सीटों पर लडे थे? 2019 में कितनी सी…	HOF	OFFN	hasoc_2020_hi_644
1127753315255705601	RT @sushma_pandey1: लड़कियों को चाँद और तारो की नही बल्कि इज़्ज़त और प्यार की ज़रूरत होती हैं😊 हर बात पर इल्जाम लगाने से पहले सोच समझ…	NOT	NONE	hasoc_2020_hi_1707
1127726543025786880	RT @MPRakeshSingh: ये मजबूत सरकार है तभी भ्रष्टाचार पर कड़ा प्रहार हो पाया है। हर प्रकार के कानून बनाकर हमने भ्रष्टाचारियों का जीना मुश्कि…	NOT	NONE	hasoc_2020_hi_493
1123822585530257409	RT @Mahende67015515: राहुल गांधी जी ने कहा- चौकीदार चोर है? लेकिन अब राहुल गांधी जी ने लिखित में माफी मांग कर कहां है- की चौकीदार चोर नहीं…	NOT	NONE	hasoc_2020_hi_2294
1127475228718690304	RT @Avantika_Pandit: कोई याद नही करता हमको 👀😭😭	NOT	NONE	hasoc_2020_hi_196
1123571975866028032	RT @HTetey: यह मांग आपत्तिजनक कैसे हुई? बुर्का पहनकर वोट देते हुए मुसलमान मर्द अभी अभी पकड़े गए। अभी अभी श्रीलंका ने बुर्के पर बैन लगाया…	NOT	NONE	hasoc_2020_hi_986
1127646213719842816	RT @SanatanUdghosh: इंदिरा ने ताजमहल से वह दरवाजा ही गायब करा दिया जिसे अमेरिकन साइंटिस्ट ने कार्बन डेटिंग कर उसकी आयु बाबर से300 साल पहले…	NOT	NONE	hasoc_2020_hi_1824
1127737385301704707	RT @tigerintolerant: जरूरी नही आतंकवाद पर चोट बम डालकर की जाए कुछ कड़े फैसले लेकर भी की जा सकती है..🙏 श्रीलंका में मस्जिद में सुनाए जाने…	NOT	NONE	hasoc_2020_hi_813
1127665490732519425	@Singhs__Queen 🙏🙏 बहन के पास है म॔त्र तो भाई को भी मिल ही जायेगा देर सवेर 😜	NOT	NONE	hasoc_2020_hi_2504
1123820521949474816	RT @SumanSh58123278: हिंदू मंदिर में जाने पर इसको धर्मनिरपेक्षता का दौरा पड़ जाता है, मस्जिद जाने की औकात ही नहीं है,मस्जिद तो इस्लामी होती…	HOF	HATE	hasoc_2020_hi_730
1123576958703456256	RT @Dr___Rishu: बड़ी हसरत से जो वो ऐप में सुधार करते है । हर बार एक नया वार करते है।। फनाह करके ही दम लेंगे ये उनकी मोहब्बत है । विभाग…	NOT	NONE	hasoc_2020_hi_2777
1127764384023867392	RT @subodh_tailang: कांग्रेस ने राहुल गाँधी के लिए करवाया यज्ञ, किया उसमे भी घोटाला, देसी घी की जगह डालडा दे दिया https://t.co/eBICfEJZWm	NOT	NONE	hasoc_2020_hi_3925
1127577108371238913	@sambitswaraj अब होगा न्याय 😜	NOT	NONE	hasoc_2020_hi_311
1127776023221637120	RT @kundanpathakk: 2024 आते-आते ऐसा #भारत बन जायेगा कि अगर आप किसी को " #कांग्रेसी कह देंगे तो वो आप पर मानहानि का मुकदमा ठोक देगा😜 #…	NOT	NONE	hasoc_2020_hi_635
1127614223779942403	RT @Pawankhera: भाई, अब समझ में आया मोदी जी प्रेस कॉन्फ़्रेन्स क्यूँ नहीं करते? https://t.co/siA9Rf1DrF	NOT	NONE	hasoc_2020_hi_975
1123488110770294790	RT @Pramodk05637970: @sonamJain001 दाल तो मिलती नहीं चले हैं दूसरों को खाना खिलाने। दाल ले लो दाल!!!☺️☺️☺️	NOT	NONE	hasoc_2020_hi_3066
1123530196416524288	RT @mmpal58: पहले धर्मेन्द्र फिर हेमा मालिनी अब सन्नी देओल को लॉन्च कर दिया! एक परिवार को इतनी तरजीह क्यों? एक्टिंग करने के अलावा कोई सामा…	NOT	NONE	hasoc_2020_hi_14
1127476449286299648	RT @Sonamda99970541: गंगा काठे घर करे,पिवे निर्मल नीर। मुक्ति नहीं हरि नाम बिन,ये कह रहे साहेब कबीर।। असली साधु वह होते है जो शास्त्रो के आ…	NOT	NONE	hasoc_2020_hi_402
1127770457409609728	धुप मे कही बाहर जाते समय अपने आप को धुप की किरणों से बचाये रखे, इसके लिये आप टोपी भी पहन सकते हो #SummerHealthTipsByBapuji https://t.co/ZsNS0yjlRQ	NOT	NONE	hasoc_2020_hi_2345
1127603033351892992	इस हिन्दू भाई ने समझाया मुसलमान क्यों वन्दे मातरम नहीं बोल सकता https://t.co/1ZAN6LAQxl	NOT	NONE	hasoc_2020_hi_2535
1127651796359569410	@LemmeWeird Noi qadar hai😐	NOT	NONE	hasoc_2020_hi_502
1123507098384355328	RT @yogrishiramdev: महान वैदिक संस्कृति के विरुद्ध दुष्प्रचार, षड्यंत्र करके नीचा दिखाकर धर्मांतरण करके देश को तोड़ने वालों से बचने के लिए…	NOT	NONE	hasoc_2020_hi_2408
1127518815934406656	मेरी एक ही जाति है- गरीबी जो महामिलावटी मेरी जाति का सर्टिफिकेट मांग रहे हैं, अच्छा हो अगर वो उतना समय जनता की सेवा में लगाएं। बुआ-बबुआ दोनों मेरे से कम समय मुख्यमंत्री रहे, पर दोनों ने अपने और अपने परिवार का खूब कल्याण किया, जनता को भूल गए। https://t.co/9Hyg94WGR0	NOT	NONE	hasoc_2020_hi_1595
1127743748048211968	RT @Vivekpandey21: नीट से क्या उम्मीद करें, हर वर्ष की तरह फिर परीक्षा ने हजारों के जीवन के साथ खेल कर दिया। कही पेपर लीक की बाते तो कही ले…	NOT	NONE	hasoc_2020_hi_3825
1123810531108900864	RT @RohitKu38802767: जली रोटी और पतली दाल के विरोध करने वाले सिपाही को लोग ऐसे देख रहे हैं के रोटी दाल मानो मोदी ने बनाई थी ??? @narendramo…	HOF	OFFN	hasoc_2020_hi_1070
1127565758597406720	RT @YogeshKumarMJan: अभी अभी रिपब्लिक भारत में एक ऐसी वीडियो दिखाई जा रही है जिसमें कुछ मुंह ढंके हुए, सफेदपोश पुरुलिया, बंगाल में हाथों…	NOT	NONE	hasoc_2020_hi_461
1123526744500137985	RT @Alina_Speake_10: ब्लॉक मारने की धमकी वह भी हमको . मैं खुद बीजेपी को चुनौती दे रही हूं . 23 मई बीजेपी गई👍👍👍👍 #Alinasiddiqui	NOT	NONE	hasoc_2020_hi_3589
1123562333182107655	RT @SudarshanNewsTV: श्रीराम की जन्मभूमि पर आत्महत्या कर लेगा एक मुसलमान… अगर फिर से मोदी न आये तो https://t.co/BYyQBpYYqC	HOF	HATE	hasoc_2020_hi_128
1127636789139664896	RT @vikrantkumar: दिल्ली में चुनाव खत्म हुआ, कम से कम आपिये कुछ दिन शान्त रहेंगे. सुधरने वाले तो ये हैं नही..	NOT	NONE	hasoc_2020_hi_2337
1127599392687394816	Aanndd he did it	NOT	NONE	hasoc_2020_hi_1055
1127481721505632256	RT @kumar_damoh: tery jesye dhudh bhahut he sundar or piyarye piyarye hai or wo to or aachhi hai tumye karta rahu https://t.co/9UEDFuEmPe	HOF	OFFN	hasoc_2020_hi_630
1127778565003431941	RT @gopalram02: @SatlokChannel #ChowkidaroKaScam मनोहर लाल खट्टर जी , और नितिन गडकरी जी ने तो एक बार फिर कांग्रेस का ये वचन सत्य कर के दिखा…	NOT	NONE	hasoc_2020_hi_2000
1127596720915828736	@ANI जिस तरह से कांग्रेस बौखला गई है दिल मिला रही है इससे यह साबित हो गया है कांग्रेस का सूपड़ा साफ है कांग्रेस खत्म हो चुकी है अब भविष्य में कभी भी कांग्रेस की सरकार नहीं बनने वाली है जिस तरह की यह भाषा का उपयोग कर रहे हैं वह भाषा साबित कर रही है यह लोग चुनाव हार गए	HOF	HATE	hasoc_2020_hi_3893
1127769052317753344	RT @Kaushal25608711: चढ़ गुंडो की छाती पे वोट करेंगे हाथी पे।।। https://t.co/JAyu3DYRnh	NOT	NONE	hasoc_2020_hi_139
1123628955502649344	@rssurjewala तेरे सूजे हुए मुँह से न्याय की बाते अच्छी नही लगती, तू अब evm में गड़बड़ी के सबूत बना, 23 मई के बाद कैसे मुँह दिखायेगा ?	HOF	OFFN	hasoc_2020_hi_1237
1127805656012972038	मोदीजी के उस बयान से जुड़ा ट्वीट डिलीट कर दिया है जिसमें वे बता रहे हैं कि बादलों की वजह से रडार काम नहीं करता इसलिए मैंने खराब मौसम के बावजूद एयर स्ट्राइक करने का सिग्नल दिया था "रक्षा विशेषज्ञ भौंचक" https://t.co/0HCM7ZOT7q	NOT	NONE	hasoc_2020_hi_3170
1127477103568359425	2014मेंbjpने बडे़ वादे किए थे हर एक के खाते में15लाख,काला धन वापस लायेंगे अच्छे दिन आयेंगेकाला धनतोआया नहीं उल्टा माल्या,चोकसी,निरव मोदी देश का सफेद धन लेकर भाग गये पूछतेहैं5साल क्या किया तो कहतेहै काँग्रेस ने60साल क्या कियाअरे भाई 5 साल के लिए वोट bjp को दिया था congress को नही	NOT	NONE	hasoc_2020_hi_3510
1123475645294575616	@TV9Bharatvarsh @narendramodi कोई चोक़ीदार भी नहीं चाहता उसका बेटा चोक़ीदार बने	NOT	NONE	hasoc_2020_hi_2538
1127518442628608000	@narendramodi सारे नेता का मुँह शिर्फ इसलिए बंद हैं क्योंकि वहाँ कांग्रेस की सरकार हैं भाजपा की सरकार होती तो अभी राजस्थान सुलग रहा होता सारे हरिजन नेता वहां की सरकार की धज्जियाँ उड़ा रहे होते ✍️	HOF	HATE	hasoc_2020_hi_2807
1123759377356394499	प्रभु श्रीरामजी का जन्म प्रमाणपत्र मांगने वाले आज अपनी पैदाइश के सबूत ढूंढ रहे है! चेतन जगत	HOF	OFFN	hasoc_2020_hi_491
1127813184776282113	RT @rukasa007: अमेरिकी राजदूत से कहने लगे कि भारत के लिए चिंता का विषय ‘हिन्दू आतंक’ है, न कि ‘जेहादी आंतक’ सिंह का दावा है कि हिन्दू आतंक…	NOT	NONE	hasoc_2020_hi_1047
1127581772424736768	@aajtak @yadavtejashwi शुरू कर दिया एंडी रोना लल्ला	HOF	OFFN	hasoc_2020_hi_1315
1127513224914452480	@ShubhankrMishra लौंगलता भी खा लीजिएगा	NOT	NONE	hasoc_2020_hi_2559
1127656959518203905	@rdpkumar7726 @myogiadityanath इसका माकुल जबाब मिलेगा, बस थोड़े दिन की ही तो बात है।	NOT	NONE	hasoc_2020_hi_622
1123764586677710848	RT @Dk6eYKyUu5kp5gJ: क्या कोई जानकार मित्र बता सकता है कि पप्पू मूत्र में ऐसा कौन सा केमिकल होता है जिसको पीकर कांग्रेसी चमचों को चौकीदार…	HOF	OFFN	hasoc_2020_hi_1121
1123525377131937793	RT @sambit_swaraj1: हर हिंदू अपने बच्चों मे यह आदत डाले... 1: मंदिर घुमाने लेकर जाइये 2: तिलक लगाने की आदत डाले 3: देवी देवताओं की कहानि…	NOT	NONE	hasoc_2020_hi_4305
1127612931925897217	RT @SirChanakya: @msisodia @GautamGambhir अरे ओ सड़क छाप गुंडे छिछोरिये! गौतम गंभीर देश के लिए खेलता है, तेरी तरह पाकिस्तान के लिए नहीं😡	HOF	OFFN	hasoc_2020_hi_220
1127474935104860160	@AjayKum26512561 #पप्पू को मन करो	NOT	NONE	hasoc_2020_hi_3574
1123820173805461504	@girirajsinghbjp चौकीदारन एक बात तो तुझे माननी पड़ेगी तेरा चौकीदार विना चुनाव के देश के एक जवान से चुनाव हार गया इतना डर गया तेरा चौकीदार एक जवान से कि चुनाव आयोग से मिलकर उसका नामाँकन रद्द करवा दिया सोच जो चौकीदार मेरे देश के एक जवान से इतना डरता है वो पाकिस्तान से कितना डरता होगा चौकीदारन	NOT	NONE	hasoc_2020_hi_2258
1127603272431341568	@iamadil555 @SRKsAnshiiii Bhagwan hai apan	HOF	OFFN	hasoc_2020_hi_4278
1127685862484008965	RT @AbdulHa06460548: हमारे यहां एक गरीब चच्चा हैं जो 35 वर्षों से फटे पुराने बैग सिल रहे हैं जनाब मुफ्तआवास और गैस कनेक्शन लेने के बाद भी…	NOT	NONE	hasoc_2020_hi_548
1127585752840196097	RT @Gabbar0099: जब बादलों के कारण प्लेन दिखने नहीं थे तो... रिवर्स गेयर में, प्लैन क्यो चलाये? सुबह से सोच सोच कर परेशान हो गया हुं ! 😂	NOT	NONE	hasoc_2020_hi_1193
1127585626990071809	RT @Kailash26654053: #SundayThoughts क्या ईसा मसीह हमारे पापों से मुक्त कर सकते हैं नहीं वह परमात्मा तो कोई और ही है उसकी जानकारी किसी तत्…	NOT	NONE	hasoc_2020_hi_74
1127461383337955329	RT @JavedAlamPES6: @RoflGandhi_ @gops333 कन्हैया ने "टुकड़े-टुकड़े" नारा नहीं लगाया था !! ये क्लिप जोड़ी गई थी !! "भारत माता तेरे टुकड़े…	NOT	NONE	hasoc_2020_hi_3092
1123566351287607296	RT @Suresh91648491: #Thursdaymotivation @PMOIndia जहां संखों लहर मेहर की उपजै,कहर नहीं जहां कोई। दास गरीब अचल अविनाशी, सुख का सागर सोई।। अस…	NOT	NONE	hasoc_2020_hi_4292
1123563360778215427	“कौनसा अंदाज़ है ये तेरी महोब्ब्त का, ज़रा हमको भी समझा दे, मरने से भी रोकते हो, और जीने भी नहीं देते..| @yash410718 @VishalV86792196 @DrKumarVishwas	NOT	NONE	hasoc_2020_hi_1490
1123820035401822209	@JindalViv @ArvindKejriwal पिछली बार की लात अभी भूला नही है ना। अभी दर्द है। और वैसे भी राजनीति के बड़े वाले भगोड़ों में गिना जाता है ना।	HOF	OFFN	hasoc_2020_hi_2551
1123777429670170625	RT @sambit_swaraj1: ✋🤚MP ठगा, 36गढ़ ठगा और ठगा राजस्थान..✋🤚 कर्ज माफ़ी के लालच मे मूर्ख बना किसान🤚 अब 🤚✋72 हजार के झांसे में मत आना हिन्दु…	NOT	NONE	hasoc_2020_hi_3737
1127612906772631552	RT @malaradnik: 👌❣️👌 कभी पुरानी गलियों में भी हो लेना के दरवाजे अब भी रास्ता देखते हैं सुबह कुछ अनमनी सी है दोपहर में धुप कुछ कम…	NOT	NONE	hasoc_2020_hi_3740
1127764744754978816	RT @Varinde71556051: @RishiDarshan ग्रीष्म ऋतु में दही तो भूलकर भी नहीं खाना चाहिए, नहीं तो नुकसान करेगी, सीधे दही नहीं खाना चाहिए। पूर्ण…	NOT	NONE	hasoc_2020_hi_3031
1127606430746365952	@ReallySwara @dilipkpandey @AAPDelhi कठुआ मामले में सड़को पर उतरे तमाम तथाकथित #बुद्धिजीवी, #Celebs इस बार वो तेजी या वो आक्रोश नहीं दिखा रहे हैं ,,😠😠😠 कश्मीर में 3 साल की बच्ची से बलात्कार.. बलात्कारी का नाम ताहिर अहमद जिसने रोज़ा इफ्तारी से पहले दिखाई थी टॉफी!!	HOF	HATE	hasoc_2020_hi_3010
1127765994640822272	RT @being_Ajay_: उम्र की ढलान में "इश्क़" होना कोई अचरज की बात नहीं गेंद🎾जब पुरानी हो जाती है तब "रिवर्स स्विंग" लेती है... 😜😉 #GOODMORN…	NOT	NONE	hasoc_2020_hi_541
1127635115587375104	@Akgemini2 Aarahii hai ajki generation hoshiyaar hai	NOT	NONE	hasoc_2020_hi_3245
1123825060182151168	RT @Saumya_Sweety: प्रकाश अम्बेडकर ने पहले ही कहा था कि हम सत्ता में आये तो चुनाव आयुक्त को जेल भेजा जाएगा. उस समय हंसी आ रही थी पर अब लग…	NOT	NONE	hasoc_2020_hi_3817
1123483362826575877	वे मूर्त रूप देते हैं दूसरे के सपनों को वही श्रमिक वही कामगार वही मजदूर कहलाते। खुद रहते हैं झोपड़ी में फुटपाथ पर सड़क की। जो दूसरों का मकान किला हवेली हाऊस बनाते हैं। रंगते हैं पोतते हैं सजाते हैं खिड़की दरवाजा लगाते हैं फिर डंडा लेकर रात भर चौकीदारी करते हैं #LabourDay	NOT	NONE	hasoc_2020_hi_53
1127761070523686912	@Meenakshi7771 23455 ये कुछ कम नही हो गए। चमचो की नज़र में	HOF	PRFN	hasoc_2020_hi_1734
1127476667385913345	RT @AAPKA_RK: अगर देश वेस्ट दिल्ली की रहने वाली गौरवी यादव की बात समझ ले तो देश विकसित होगा । उनका कहना सही है पीएम फेस को देख कर वोट नही…	NOT	NONE	hasoc_2020_hi_2096
1123595069724880896	RT @manakgupta: मसूद अज़हर पर पाकिस्तान भी बैन लगाएगा. बालाकोट ‘ऐयर-स्ट्राइक’ का असर अब भी काम कर रहा है #MasoodAzhar	NOT	NONE	hasoc_2020_hi_1060
1127494186968555520	दुनिया मे अगर कोई थूक कर चाटने बाला है तो वह @ArvindKejriwal है ।https://t.co/l0oUwmKTDS	HOF	OFFN	hasoc_2020_hi_514
1123605895223619584	@Shraddh64712686 @follow2deep @devilx710 @ReallySwara हाफिज की म का ब ।। घोषित करने से कुछ नहीं होती जैसे छोड़ कर आये थे वैसे वापिस लेकर आओ और हम बीच बाजार में उसे उल्टा लटका कर उसे सजा देंगे और कुत्ते की मौत मरेंगे तुम्हारी तरह पाकिस्तान छोड़ कर नहीं आएंगे।।	HOF	OFFN	hasoc_2020_hi_1390
1127491007677734912	RT @yadavdimples: @RahulGandhi पहली बार वोट करने वालों को बताया जा रहा है कि 2014 के पहले भारत की विदेश में इज्जत नहीं मिलती थी, देखिए 1985…	NOT	NONE	hasoc_2020_hi_3306
1123611788212228096	@Anita_Sharma3 @Kavita_Sharma4 135 करोड़ की आबादी है देश की उनमे करीब 60% यूवा बेरोजगार भरे पड़े है और नल्ले बैठे है वैसे भी मौजूदा हालात मे नामर्द मोदी की घटीया सरकार में 45 साल मे सबसे ज्यादा बेरोजगारी बढ़ी है तो सबको नौकरि तो नही मिलेगी अगर आप हां कर दे तो दूल्हे के Application डाल देगे 🤣🤣🤣🤣	NOT	NONE	hasoc_2020_hi_870
1127798072702976001	RT @Essdee59652254: @RaghibMohammadi कम-से-कम पढे लिखे लोगों ने तो अपनी जवाबदारी समझनी चाहिए! इस बात को एक सबक समझते हुए अगली बार गलती करने…	NOT	NONE	hasoc_2020_hi_1376
1123510613211095040	RT @AmitAgarwal9: राजस्थान में कांग्रेस जनता को मूर्ख बना रही है। 72,000 वाला फ़र्ज़ी फॉर्म बांटकर लोगों को कांग्रेस को वोट देने की भीख मां…	HOF	HATE	hasoc_2020_hi_1348
1127804661950570496	RT @KiranSh10248079: #Ramadan2019 कुरान शरीफ का ज्ञान दाता कहता है कि उस अल्लाह की शरण में जाने के लिए किसी तत्वदर्शी संत से जाकर पूछो वह त…	NOT	NONE	hasoc_2020_hi_1218
1123798006896238593	लोकतंत्र सबको समानता का मौलिकता अधिकार देता है। तो फिर न्याय में हिंदूसन्तों के प्रति पक्षपातपूर्ण व्यवहार क्यों? 83 वर्षीय Sant Shri Asaram Bapu Ji व Narayan Sai जी पर षड्यंत्र पूरे सिस्टम पर प्रश्नचिन्ह अंकित कर रहा है। #IndianJudiciaryAtStake https://t.co/VGqLduHI0O	NOT	NONE	hasoc_2020_hi_3637
1.12756e+18	ए जेलर बाबू.. तनी देखिए त.. ई कैदी न० 420 के नाम पे के ट्वीटिया रहा है।	NOT	NONE	hasoc_2020_hi_3193
1127631797884313600	@ombirlakota जहां एक तरफ इंसाफ की बात कही जा रही है और दूसरी तरफ उसी पार्टी के नेता पैसे लेकर मामले को रफूचक्कर करने में लगे हुए हैं https://t.co/ZgMw72sEqw	NOT	NONE	hasoc_2020_hi_4267
1127540278191988736	@pawanpandeysp @yadavakhilesh @ajitanjum निरहुआ का मानसिक संतुलन खराब हो गया है,उसको इलाज की जरूरत है।	HOF	OFFN	hasoc_2020_hi_4352
1127486238766682113	RT @sherpa_mohan: सही कहा, जरा साइड दो **** वाले, मोदी जी मंच में जा रहे है अगला पांच साल के लिए भारत के प्रधान मंत्री की सपथ लेना है https…	HOF	PRFN	hasoc_2020_hi_4205
1123651290150522880	RT @INCIndia: चोरी करने के बाद चौकीदार कह रहा है कि "हम सब चौकीदार"। मोदी जी पूरा हिंदुस्तान चोर नहीं है, सिर्फ एक चौकीदार ने चोरी की है। आ…	NOT	NONE	hasoc_2020_hi_970
1127719140083372032	,खुद में काबलियत नही है दोष चमारो को देती हो, चमारो की वजहे से ही इतना बोल रही हो नही तो चूला चौका कर रही होती	HOF	OFFN	hasoc_2020_hi_606
1123626770249453568	श्रीलंका का नया रूप देखकर इसराइल को भी ताज्जुब ~ नेतन्याहू	NOT	NONE	hasoc_2020_hi_284
1123826024867926021	RT @ArnabSpeaks_: आज 133 साल पुरानी कांग्रेस पार्टी "ताश की गड्डी" बनकर रह गई है जिसमें "बेगम" भी है,"गुलाम" भी है, और "जोकर" तो है ही 😃	HOF	HATE	hasoc_2020_hi_3131
1123554397550551041	@akashbanerjee @ArvindKejriwal भाई मार कम और घसीट ज्यादा रहे हो🤣🤣🤣	NOT	NONE	hasoc_2020_hi_1639
1123620621387059206	RT @bhavsarhardiik: चीन ने अपना विटो पावर खत्म किया,मसूद अजहर आंतरराष्ट्रीय आतंकवादी घोषित हुआ #मोदी_हे_तो_मुमकिन_है 💪 https://t.co/XYZAC7…	NOT	NONE	hasoc_2020_hi_1029
1127523647759851521	RT @alok_ajay: अरे @RahulGandhi जी आप कहते हैं की @narendramodi जी में नफ़रत हैं और आप उन्हें सिर्फ़ प्यार देंगे इसीलिए झप्पी भी दी ,आँख भी…	NOT	NONE	hasoc_2020_hi_1228
1127772495807795201	RT @nr_kadam: ⁦@richaanirudh⁩ बूझो तो जाने :- इस चित्र में बताओ कितनी बेटी,कितनी माँ,नानी और परनानी हैं ! इस प्रकार कुल रिश्तों की संख्या…	NOT	NONE	hasoc_2020_hi_2088
1127638479444123648	बेटा पहले आपनी नौकरी तो कर ले वरना राहुल बाबा तेरी पगार काट लेगे	NOT	NONE	hasoc_2020_hi_1574
1127532510332706816	RT @Chander83237504: #WednesdayWisdom ब्रह्मा विष्णु महेश अजर अमर अविनाशी नहीं है इनका भी आविर्भाव तथा तिरोभाव होता है अधिक जानकारी के लिए…	NOT	NONE	hasoc_2020_hi_3220
1127505868101226497	पहले मुझे करेला बिल्कुल पसन्द न था,😪 फ़िर जिंदगी में करेले जैसे लोग आते गए औऱ अब🤐 करेला मेरा fvrt है😜	NOT	NONE	hasoc_2020_hi_2217
1127791005296578560	RT @TheLallantop: नेहरू को कोसते-कोसते जिन्ना के गुण गाने लगे बीजेपी कैंडिडेट. ऐसी बड़ाई कर बैठे, जिसके आस-पास लाल कृष्ण आडवाणी कह गए थे तो…	NOT	NONE	hasoc_2020_hi_512
1123579957609947137	@msisodia 10-10 करोड़ 😱😱😱 फिर से चेक करो। १० हजार कहा होगा।	NOT	NONE	hasoc_2020_hi_3864
1127674596591673345	RT @ashokshrivasta6: इस सबके बाद फिर कह रहा हूँ कि दो फैक्टर ऐसे हैं जिसका परिणाम क्या होगा कोई अनुमान नहीं लगा पा रहा, मैं भी नहीं। 1) 5…	NOT	NONE	hasoc_2020_hi_560
1123801593026105345	RT @FatyachandJ: अरे जलील खुदगर्ज कमीने गिरे हुए इंसान लालची देशद्रोही भ्रष्टाचारी और जयचंद तू पूरा विपक्ष पूरा महा ठग बंधन मर कर दोबारा…	HOF	PRFN	hasoc_2020_hi_2433
1127587501839765505	RT @kyamat01: बहुत दीमाग लगाने के बाद मैने आलू से सोना बनाने का फार्मूला बनाया है।। *आलू = चिप्स = मोटापा = थकान = सोना* 😂😂😂😬😬😝😝 #कयामत…	NOT	NONE	hasoc_2020_hi_4252
1127491175475101696	RT @SukantRana5: @OyMIH87chr5V65d @myogiadityanath @PMOIndia हाँ तो हम हमेशा सही को सही ओर ग़लत को ग़लत ही बताते हैं नासमझ नहीं हैं इसीलिये…	NOT	NONE	hasoc_2020_hi_2331
1127615377213542401	@yadavtejashwi तू भी बहुत गरीब और पिछड़ा आदमी है... हे भगवान सरकार इस पर ध्यान दे ये बेचारा पिछड़ा बुखमरी से बचने के लिए प्राइवेट जेट करके सुसाइड करने चला है... बचाओ कोई इसे कही कूद ना जाए..	NOT	NONE	hasoc_2020_hi_120
1127546104067661830	RT @gurdeepsappal: नोटबंदी पर RBI की नहीं सुनी GST पर experts की नहीं सुनी पठानकोट में ISI को बुलाया, सेना की नहीं सुनी नवाज़ शरीफ़ के घर ग…	NOT	NONE	hasoc_2020_hi_1982
1127477497824591872	@SushantBSinha सुशंत तु इस जनम मे तो पतलकार ही रहेगा पत्रकार ना बन पायेगा	HOF	OFFN	hasoc_2020_hi_4047
1123751856981852162	RT @Radheys78281235: @priyankagandhi 60 साल के शासन में कॉन्ग्रेस बुंदेलखंड में पानी की समस्या को क्यों दूर नहीं कर पाई, इसका भी जवाब दे दो…	NOT	NONE	hasoc_2020_hi_1652
1127622239069921281	RT @HardikChauhan36: मैं चाहता हूं सन्नी पाजी बीजेपी स्पीकर बन जाएं तो कागीयो के बोलने से पहले ही कह देगें अगर कोई गलती की तो यही उठा उठा…	NOT	NONE	hasoc_2020_hi_1386
1127605965166014464	@abhisar_sharma बस 23 तारीख तक रुक जा चौकीदार ऐसी चौकीदारी करेगा कि तेरे पीछे से डंडा डालेगा और मुंह से निकालेगा	HOF	OFFN	hasoc_2020_hi_4194
1127732452825321472	RT @Sunitakohhli: मेरा बदन लाजबाव है, मेरे होंठौ का शराब सा हाल है, वो कहता है, जब भी पीता है मेरे शराब से होंठो को, तो हो जाता है उसका श…	HOF	PRFN	hasoc_2020_hi_2496
1123817216821141511	@kunalkamra88 हरे रंग को खुश करने में, तुमने भगवा को नीलाम किया, अरे सियासी कलमुहो ये बहुत घिनोना काम किया, खत्म करनी तुम्हारी नोटनकी है, #भगवा मेरी जान है.	HOF	HATE	hasoc_2020_hi_4243
1127575933957935110	RT @kpmaurya1: देशहित में वोट करें देशद्रोहियों को चोट करें भ्रष्टाचार पर चोट करें, प्रयागवासी नोट करें, 12 मई को वोट करें। #6thphase #si…	NOT	NONE	hasoc_2020_hi_1654
1127487023118336000	@ashutosh83B पहले वाली गलतियों के बारे में, ज्ञान की कमी, या गलती से कुछ गलत कह जाना, कहा जा सकता है। पर इस बार की बात को,ज्ञान की कमी के बावजूद मनगढ़ंत कहानियां गढ़ना, ही कहा जा सकता है।	NOT	NONE	hasoc_2020_hi_2681
1127485655750193153	RT @KapilMishra_IND: वेस्ट दिल्ली के AAP उम्मीदवार का बेटा बोल रहा हैं - 6 करोड़ में बिक गया केजरीवाल 6 करोड़ में लोकसभा टिकट बेचा केज…	HOF	OFFN	hasoc_2020_hi_2372
1127577041250004992	RT @apkamahesh: @EvolveLeadLove फालसे खाए हुए अर्सा हो गया। बचपन में एक बाबा ठेले पर फालसे बेचने आते थे। तब से ना देखे, ना खाए।	NOT	NONE	hasoc_2020_hi_3347
1123619212121919488	@bhavet_ @ArvindKejriwal @TajinderBagga @sudhirsushmavns @colkt @kapoorashok25 @Kiranja34522516 @krishak_sandeep @BDUTT @Gauravmtweet आज का ज्ञान वक्त से बङा कोई टीचर नहीं और #केजरीवाल से बङा कोई फटीचर नहीं😃	HOF	OFFN	hasoc_2020_hi_3826
1127642631771570176	@umashankarsingh ऐसा तो नहीं कि 23 मई के बाद आप उनको देख लेंगे।☺️☺️ जरा बचके!	NOT	NONE	hasoc_2020_hi_3415
1127610734097993729	RT @Dilsedesh: मुझे नहीं पता की क्या हुआ लेकिन हरियाणा के लोगो ने एकदम यू टर्न लिया है ऐसा देखने को मिला यहाँ पर लोग मोदी के विरोधी कैसे हो…	NOT	NONE	hasoc_2020_hi_1469
1127473437767716864	@BheekamRathore @ManojTiwariMP @S21Nawab_ सर जी की भी गाँड़ में झाड़ू, भाई मैं किसी पार्टी या नेता का भक्त नही हूँ जो गलत है उसके खिलाफ लिखूंगा भी बोलूंगा भी फिर वो चाहे मोदी हो राहुल हो केजरीवाल हो ममता हो अखिलेश हो या मायावती हो	HOF	PRFN	hasoc_2020_hi_432
1127604539132186626	RT @MurariDas9: को लोग ईसा मसीह की मृत्यु के रूप में याद करते हैं इससे साबित होता है कि ईसा मसीह की भी मृत्यु होती है जबकि पूर्ण परमात्मा…	NOT	NONE	hasoc_2020_hi_2819
1127506040092708865	RT @ravibhadoria: गद्दारों की छाती पर चोट करके आया हूँ, देश के विकास के लिए वोट करके आया हूँ, मातृभूमि के सम्मान का संकल्प ह्रदय में लिए, स…	HOF	PRFN	hasoc_2020_hi_4220
1123576505731207169	RT @01amit_mishra: @pankajjha_ इस वहरूपनी प्रियंका का ढपान पंकज जी देखा है। इन्दिरा जी की तरह गले में रूद्राक्ष की माला डालकर जनता में घूम…	NOT	NONE	hasoc_2020_hi_2009
1127774811097186304	@anjanaomkashyap जनता का एक वोट पांच साल अपने सर पर चोट अगर सत्ता गलत हाथों मे चली जाए।	NOT	NONE	hasoc_2020_hi_1694
1123531538585382912	RT @myogiadityanath: जगदीशपुर (अमेठी लोकसभा क्षेत्र) में जनसभा को संबोधित कर रहा हूँ ... https://t.co/gyeblIBqbG	NOT	NONE	hasoc_2020_hi_477
1123590653084987392	काग्रेसी कहा मर गये् उनका जवाई आंतकी साबित हो गया	HOF	HATE	hasoc_2020_hi_1623
1123588564355145728	इसे कहते है 56 इंच का सीना #मोदी_है_तो_मुमकिन_है .. #MasoodAzhar	NOT	NONE	hasoc_2020_hi_860
1127600755865636864	RT @bhavsarhardiik: मेरा वोट राजगढ़ में था,अगली बार भोपाल में ट्रांसफर करा के वोट दूंगा--दिग्गी चचा, वो मोदी हे अगली बार चुनाव ही खत्म कर…	HOF	OFFN	hasoc_2020_hi_2097
1127543923021234176	@indiantweeter अरे ये सोनपरी youtuber @abhisar_sharma फिर आगयी बक्शीश लेने	NOT	NONE	hasoc_2020_hi_4346
1127711439362383872	RT @aajtak: क्या सलमान खान बॉलीवुड के सबसे घटिया स्टार हैं?...https://t.co/wYcTDB9ttE @DailyO_	HOF	OFFN	hasoc_2020_hi_777
1127604610426986497	RT @Priyaasingh0: एक आदमी बारिश में भीगते हुए ठिठुरता हुआ जा रहा था.एक लड़की जो छाता लेकर जा रही थी, बोली – “आप चाहें तो मेरे छाते के नीचे…	NOT	NONE	hasoc_2020_hi_2994
1127475438433886208	RT @hadappababa: मस्जिद और मदरसा के लिए जो कदम आज श्रीलंका गोवेर्नमेट उठा रही है वो भारत में 26/11 के बाद उठा लिया जाना चाहिए था। पर नहीं…	NOT	NONE	hasoc_2020_hi_1512
1127791722514264064	RT @PranavDass3: #वेद_मेरा_भेद_है जहां संखों लहर मेहर की उपजै,कहर नहीं जहां कोई। दास गरीब अचल अविनाशी, सुख का सागर सोई।। असली भगति वेद शास्…	NOT	NONE	hasoc_2020_hi_1173
1127584184145309696	RT @SaiS_Fidility: मैं अपने छोटे मुख से कैसे करूँ तेरा गुणगान माँ तेरे प्यार आगे फीका सा लगता जहान #HappyMothersDay गुरू माँ नसीब कौर…	NOT	NONE	hasoc_2020_hi_186
1127499438258176001	RT @rashtrawadi9: घर से बाहर निकलकर वोट करिये ये आपका फ़र्ज़ है। https://t.co/qcdMz0jMP7	NOT	NONE	hasoc_2020_hi_904
1127774773340037121	RT @GairKanooni: आप खुद हरियाणा से हैं प्रभु, कुछ तो शर्म कर लीजिए 😕 https://t.co/KEj9iCB3MB	NOT	NONE	hasoc_2020_hi_815
1123553357354770432	@ppbajpai वाजपेई जी अभी तो चुनाव में खड़े हो रहे हैं शख्स का नामांकन ही रद हो रहा है अगर 5 साल और भाजपा रही ना तो सांस लेने रोड में चलने सब पर पाबंदी लग जाएगी Television पर सिर्फ नमो टीवी का कबजा होगा और चाह कर भी कोई कुछ नहीं देख पाएगा सच हमेशा के लिए विलुप्त हो जाएगा	HOF	HATE	hasoc_2020_hi_633
1123653911594917888	@MeeratTariq1 He said irfan not affan yar😂😂😂😂😂 tumhe bus usi ka naam sunayi deta hai aj kal kya?🤣🤣🤣	NOT	NONE	hasoc_2020_hi_2818
1127500247750414336	Chachi aapka pati chara chor hai. Sumjhi? Budbuk hai kya ?	HOF	OFFN	hasoc_2020_hi_1525
1123542494103232513	@AabidShaikh77 @TarekFatah नहीं बे तेरा मोहम्मद अपनी माँ को पहली बार ठोका बोला हर औरत मेरी माल है तबसे इस्लाम में हलाला के नाम पर किसी को पेल देते हैं 😂😂😂😂😂😂😂😂😂😂😂😂😂😂😂😂😂😂😂😂😂😂😂😂	HOF	HATE	hasoc_2020_hi_71
1123534520718807041	RT @_Its_niks: बेझिझक ,बिना परहेज के जो हर काम कर ले वो मजदूर है	NOT	NONE	hasoc_2020_hi_3376
1123772920789073929	RT @raj_sharma444: यूएन ने मसूद अज़हर को वैश्विक आतंकी घोषित किया इसकी प्रतिक्रिया ... 1. सोनिया और राहुल जी ने रात का खाना खाने से किया…	NOT	NONE	hasoc_2020_hi_1600
1123568083568869378	RT @Sanjeev85934570: #TuesdayThoughts परमात्मा जब भी इस पृथ्वी पर आते हैं यह जिंदा रूप बनाकर दृढ़ भक्तों को मिलते हैं और उन्हें सत ज्ञान…	NOT	NONE	hasoc_2020_hi_1887
1127540005553885184	RT @BJP4India: 28 अप्रैल की घटना को इतने दिनों को छिपा कर रखा गया। इसकी वजह से पूरे राजस्थान में हर तरफ आक्रोश है। राजस्थान का एक भी जिला न…	NOT	NONE	hasoc_2020_hi_1064
1127490512779337728	@manojkaggarwal @ArvindKejriwal Bhakto banaya chutiya.. chutiyo ko banaya bhakt.. ✌️🤣 https://t.co/vAX1Nd0KxS	HOF	PRFN	hasoc_2020_hi_3049
1127759120197509120	@Dr_Uditraj @RahulGandhi @INCIndia पहले लिखना तो सीख लो, और चुनाव कहा से लडवा रहा है पप्पू???	HOF	OFFN	hasoc_2020_hi_1780
1127483986433830912	RT @beingchanchal_: मतदान अवश्य करे। आपकी इच्छा है, चाहे तो बीजेपी को करे, चाहे मोदी के करे, चाहे कमल को करे, परन्तु मतदान जरूर करे।। #Phas…	NOT	NONE	hasoc_2020_hi_4264
1127646951913267200	Yai tou bhudi hogayi hai 😳 https://t.co/mRRlA8YMPg	NOT	NONE	hasoc_2020_hi_1542
1127482522638532608	RT @RamBach63967607: ➡️IBM 1951 में भारत आयी थी, तब राजीव गांधी 7 वर्ष के थे और अंगूठा चूसते थे, ➡️HCL का गठन 1976 में हुआ था, जब राजीव गां…	NOT	NONE	hasoc_2020_hi_1986
1123599230445051905	@anandrai177 @narendramodi इस फ़क़ीर की US में रहने वाली तीनों बेटियों को नालंदा विश्वविद्यालय में प्रोफेसर की नौकरी थी जो उस वामपंथी अमृत्य सेन ने दी थी। टोटल 2729 करोड़ लुटवाये उस पर।	NOT	NONE	hasoc_2020_hi_2110
1127476323428048897	@pbhushan1 https://t.co/ZfjeFz9PSo बीजेपी और मोदी को कोई ना सिखाए पश्चिम बंगाल में जिस तरह से अन्याय हो रहा है वह सब और पूरा देश देख रहा है कैसे बीजेपी के लोगों को मार दिया जाता है पेड़ में लटका दिया जाता है कोई लोकतंत्र ना सिखाए	NOT	NONE	hasoc_2020_hi_1718
1123805514725511169	RT @UrmileshJ: बीते पांच साल में देश में औद्योगिक विकास पर कम ध्यान दिया गया ! लेकिन झूठ और अफवाह की मशीनों पर खूब काम हुआ!	NOT	NONE	hasoc_2020_hi_1241
1123577009043595264	RT @rssurjewala: अभिव्यक्ति पर नहीं लगेगी पाबन्दी, प्राइवेसी के कानून से मिलेगी हर आवाज को बुलंदी ! क्योंकि #CongressHaiNa #AbHogaNYA…	NOT	NONE	hasoc_2020_hi_1505
1123549620238462977	RT @vinodsharma1834: अजीब विड़म्बना है मेरे देश की.. 🤔 यहां इशरत "बेटी" है, कन्हैया "बेटा" है, दाऊद "भाई" है व अफज़ल "गु…	NOT	NONE	hasoc_2020_hi_1278
1123599318517047302	RT @VijayDa70948328: #वेद_मेरा_भेद_है अगर नंगे रहने से मोक्ष मिल जाता है तो पशुओं का मोक्ष पहले हो जाना चाहिए था मोक्ष नंगा रहने से नहीं शा…	NOT	NONE	hasoc_2020_hi_930
1127507709425737728	@RaisinaSeries ऐसा राहुल की इमेज लोटा लेकर पटरी पर बैठने वालों ने बनायी थी लेकिन मोदीजी शौचालय बनाने से क्रिश्नन सारिका को तकलीफ़ हो गयी अब लोटा लेकर कहाँ जाना	HOF	OFFN	hasoc_2020_hi_3602
1127555151198167041	RT @5Pw9g: केसी लग रही रेड ब्रा पैंटी में https://t.co/6W6DrXidrh	HOF	OFFN	hasoc_2020_hi_1330
1127533424707641344	RT @sbambam16: मै ने अपने हीसे का पाकिस्तान के ऊपर हमला कर दिया साथ मे सबुत भी लाया हुँ चमचों देखलो @narendramodi @meenakshilekhi @MamataO…	HOF	PRFN	hasoc_2020_hi_1932
1127627804923686912	@narinderwaraich @Sayed_Baqur @democraticdon @NarinderKBharaj @BhagwantMann सरदार जी canada जाने की जगह कभी खेतो में भी चले जाए पता लाग जाएगा कि आग क्यू लगाई गई थी।	HOF	HATE	hasoc_2020_hi_3056
1127513346570211328	अब ये अफबाह कौन फैला रहा है कि मोदी जी #छठा_चरण आते आते #छटपटा गए हैं। @ROl4rs28C0fkVpu https://t.co/NFu3gFhOWh	HOF	OFFN	hasoc_2020_hi_4287
1127551997085831172	@SheilaDikshit @ArvindKejriwal बिना अफवाह फैलाये भोजन पचेगा कैसे इस छछुंदर को?	HOF	OFFN	hasoc_2020_hi_50
1123489935271636994	@SumitBajoria @boomboxheto @iAnkurSingh @iamnarendranath किया सृजन भूमि घोटाला, पकड़े जाने, जेल जाने के डर से ठग से चिपका है अभी कूर्मीलाला, छोड़ेगा फिर भाजपा को, मारेगा पल्टी और मिलेगा जादो से, गुजर कर हलाला!!	HOF	HATE	hasoc_2020_hi_841
1127626240431611904	RT @PriyankaHDL: ✴बच्चे के जन्म से अपनी मृत्यु तक वह अपने बच्चों का हर पल ख्याल रखती है ✴माँ वो है जो हर दुख को सहकर अपने बच्चे को बडा कर…	NOT	NONE	hasoc_2020_hi_1672
1123766738368249856	RT @n_agashe: #Thursdaymotivation @PMOIndia जहां संखों लहर मेहर की उपजै,कहर नहीं जहां कोई। दास गरीब अचल अविनाशी, सुख का सागर सोई।। असली भग…	NOT	NONE	hasoc_2020_hi_2733
1127641667106787328	@Kavita_Sharma4 घाघरा छोड़ो और ये बताओ की पप्पू मूत्र लिया कि नहीं इसलिए ही बौखलाई हो	HOF	OFFN	hasoc_2020_hi_293
1127758243583762432	@khushbootweet चिंता ना करो, कुछ दिनों में HDFC खुद ही बंद हो रहा है.	NOT	NONE	hasoc_2020_hi_2909
1123594931275059200	अरे रे रे..., #मजदूर_दिवस पर #MasoodAzhar को अंतरराष्ट्रीय आतंकवादी घोषित कर दिया,बहुत नाइंसाफी है ये.., कितना काम करता था वो...,पड़ोसियों के सबसे बडे मज़दूरों में से एक था 😐😐 #UNSC #मोदी_है_तो_मुमकिन_है	NOT	NONE	hasoc_2020_hi_1859
1127556036183769088	@Nihu_singh99 @Nikesh_pareek99 @NishaMe92814302 ऐक भाई रेह गया, गोरी हो या काली हो या पैसे वाली हो अपनाभी चक्कर चला दे हमको भी दुलहन दीला दे	NOT	NONE	hasoc_2020_hi_1267
1127771162027552768	@FunKeyBaat @iAadiRaj @RahulGandhi @priyankagandhi 😂😂😂😂😂 वो ये कहना चाह रहे है इसबार फिर हाथ उल्टी परने वाली हैं। आएगा तो मोदी ही	NOT	NONE	hasoc_2020_hi_4212
1127488730175037441	@VinodCh37510957 @DrAshish_A1 @Deepak08463847 रोज मार कर भगा रहे है, क्योकि यूपी बिहारी यो ने थोड़ी भी खाली जगह देखली तो वहाँ पर ठेला लगाकर गंदगी फैलाना शुरू कर देते है	HOF	HATE	hasoc_2020_hi_4398
1127736659695394816	लौकतंत्र कुछ ही परिवार, लोगों का बंधुआ मजदूर होकर रह गया है,जो देश को बर्बाद करने में लगे हैं,या उनकी मदद कर रहे हैं,या जो अपना घर भरने में लगे, फिर भी राष्ट्र भक्ति बने हुए,हम उनकी भक्ति कर रहे हैं, भक्तों के कारण नेता चोर और हराम खोर हो गया है, देश हराम खोरो का बहिष्कार करें	HOF	PRFN	hasoc_2020_hi_1036
1123499712206663680	RT @123456777788nr: किस्मत की हर लकीर मे सिर्फ तेरा ही नाम हो, . . . . . हर सुबह तुझसे शुरू और तेरे साथ ही हर शाम हो..!! है कोई लड़की जि…	NOT	NONE	hasoc_2020_hi_2731
1127604757214797830	@sheriff_eye @DeemagSePaidal ये पागल है आपको ऐसे ही तंग करेगा इसलिए जल्द से जल्द इसे ब्लॉक कर दो	NOT	NONE	hasoc_2020_hi_4306
1127595051591143425	RT @yogrishiramdev: वोट से हर खोट को दूर करें। वोट लोकतंत्र की सबसे बड़ी ताकत व जिम्मेदारी है, लोकतंत्र के साथ देश का वर्तमान और भविष्य वोट…	NOT	NONE	hasoc_2020_hi_428
1123672731441160192	RT @anjanaomkashyap: अंजान आदमी था। प्रधानमंत्री के रोड शो में BHU तक पहुँचना था। उसकी बाइक पर मैं पीछे बैठ गई। ऐसा क्यों करना पड़ा देखिए…	NOT	NONE	hasoc_2020_hi_410
1127576131090075648	@SuperLonday 2014 के बाद ऐसा क्या हो गया कि सच बोलने वाला मीडिया गोदी मीडिया हो गया.. और होशियारी से झूठ बोलने वाला मीडिया कांग्रेसी मीडिया हो गया..!	NOT	NONE	hasoc_2020_hi_3179
1127569134982549504	@p_sahibsingh ममता पागल हो गई है एक तो जिंदगी से खफा है कि जवानी में उसको किसी ने घास नही डाली और अब बुढ़ापे में भाजपा ने परेशान कर रखा है	HOF	OFFN	hasoc_2020_hi_386
1127784613164793856	RT @yadavtejashwi: रडार से बचने के लिए बादलों के बीचों-बीच बक्सर के असली ग़रीब चाय वाले की चाय पी रहा हूँ।बादलों में रडार से बचने की अद्भुत…	NOT	NONE	hasoc_2020_hi_877
1127471197996720128	RT @strtvivek: हर एक लड़की और औरत जिसने किसी भी कदम पर तुम्हारा साथ दिया हो उसके अंदर एक माँ बस्ती है। हर औरत माँ का ही एक रूप है। चाहे उ…	NOT	NONE	hasoc_2020_hi_1003
1123819305567707137	RT @IndrapalDash2: #वेद_मेरा_भेद_है कबीर जी ने समझाया है कि हे मानव शरीर धारी प्राणी! यह मानव जन्म बहुत युगों पर्यन्त प्राप्त होता है। तत्…	NOT	NONE	hasoc_2020_hi_3404
1127469167949385728	@sobst हवस्	HOF	PRFN	hasoc_2020_hi_1264
1123563297846902786	RT @tejbahadursp: सपा से टिकट मिलते ही मैं भारतीय जवान से देशद्रोही हो गया। और भाजपा से टिकट मिलते ही आतंकी प्रज्ञा देशभक्त हो गई!	HOF	OFFN	hasoc_2020_hi_3137
1127524390172672000	RT @ajitanjum: आज़मगढ़ से BJP उम्मीदवार निरहुआ जैसा दावा तो किसी नेता ने नहीं किया , खुद मोदी ने भी नहीं .. इतना अहंकार ? @nirahua1 https:…	NOT	NONE	hasoc_2020_hi_2172
1127672394561335296	RT @AacharyaSahiiL: जैसे ही मैं पेशाब करके आया तो देखा की पायलट स्टार्ट करने वाला था मैंने कहा की चाभी लगाने के कुछ सेकंड बाद ही प्लेन को…	NOT	NONE	hasoc_2020_hi_2969
1127737192355262469	RT @KailashOnline: मीडिया ने देखा हिंसा का तांडव !!! #TMC ने आज देश के प्रमुख मीडिया को अपना असली चेहरा दिखा दिया! मतदाताओं को #BJP को वोट…	HOF	HATE	hasoc_2020_hi_177
1127777013073207296	@PoliticalWire_ @ShilpiSinghINC दिग्गी नही दिए वोट	NOT	NONE	hasoc_2020_hi_1617
1127634566124953600	RT @sambit_swaraj1: मैं मतदान करके कमरे से जेसे ही बाहर निकला लाइन में खड़े मेरे मित्र ने पूछा... वोट डाल दिया ? मैने कहा:- हां.. मैंने…	NOT	NONE	hasoc_2020_hi_1579
1127601724741410816	RT @ShilpiSinghINC: अगर इतिहास मिटाने की कोई मशीन होती तो अंधभक्त आने वाली पीढ़ी को बताते कि भारत 2014 में आजाद हुआ और उसे मोदी ने आजाद करा…	NOT	NONE	hasoc_2020_hi_2747
1127806901683609601	@kapsology @Aam_Nationalist सबक नहीं सीखाया मुसलमानों का नरसंहार किया	HOF	HATE	hasoc_2020_hi_1749
1127600239949467648	@Goldenthrust @thelosthodthelg लग गयी लंका	NOT	NONE	hasoc_2020_hi_1149
1127616484514172928	RT @sheetal11966920: #SpiritualSunday12thMay @Gurmeetramrahim @derasachasauda इंसान जब सत्संग में आता है तो उसके बुरे कर्म ख़त्म होते चले…	NOT	NONE	hasoc_2020_hi_2037
1127781878474215425	@Kavita22666851 बेटा नहीं त्यागता।जो बहू बनकर आती है, उसकी वजह से होता है ये। उसको अपनी मां तो बहुत अच्छी लगती हैं लेकिन सासू मां जहर लगती है।	NOT	NONE	hasoc_2020_hi_1399
1127546351527526400	RT @NAgarwal8: कांग्रेस और कांग्रेसी राजस्थान के अलवर दुष्कर्म कांड पर कुछ नहीं बोलते इतने भयंकर कांड को इन्होंने वोट की खातिर दबाया क्यों?…	HOF	HATE	hasoc_2020_hi_2507
1123587649971732480	RT @pushpasbg: गमों की स्याही से लिखा गया था वजूद मेरा~~ मैंने मुस्कुरा के बस उसको नाकाम कर दिया~~ https://t.co/LxxZp6urGb	NOT	NONE	hasoc_2020_hi_855
1127620343265239040	@ak100s @Sunitagupta__ Isne ungli karne k ellawa sikha hi kya hai	HOF	OFFN	hasoc_2020_hi_3446
1127570607216910336	RT @Saffron_Rounak: ये हैं @ArvindKejriwal के बारे में अन्ना हज़ारे की राय जिसे गुरु कहा उसे भी न बख्शा अपने बच्चों का नहीं हुआ, अपने साथि…	NOT	NONE	hasoc_2020_hi_4297
1123741027280535557	RT @Rajlakshmiyadav: भारत माता की रक्षा करने वाले असली ५६ इंच के सीना वाले जवान से फेंकू डर चुका है।हार के डर से नामांकन ही ख़ारिज करा दिया…	HOF	OFFN	hasoc_2020_hi_1811
1127489669694799879	@INCIndia @RahulGandhi #MeraVoteModiKo #VotingRound6 #DeshKeDilMeiModi #LokSabhaelections2019 #भक्त_गुलाम 110करोड़ ट्वीटर फालोअर्स के साथ दुनिया मे सबसे आगे @BJP4India 5.14करोड़ फालोअर्स के साथ @INCIndia कोसो दूर. @AmitShah @narendramodi @RahulGandhi @priyankagandhi	NOT	NONE	hasoc_2020_hi_1909
1127560540853657600	RT @BJP4India: जिस समय देश का विभाजन हुआ करतारपुर साहिब 6 किमी दूर रह गया। अगर उस समय कांग्रेस के हुक्मरान करतारपुर साहिब का सम्मन करते…	NOT	NONE	hasoc_2020_hi_611
1123767573059985408	अरे शेर होते तो चारा का घोटाला नही करते	NOT	NONE	hasoc_2020_hi_3613
1127609647798468608	हम मानते हैं | गरीबी देश की बहुत बड़ी बिमारी है |लेकीन ईस बिमारी को पालने वाले मानसिक बिमार है | जो की 72000₹ से दुर नहीं की जा सकती हैं |	NOT	NONE	hasoc_2020_hi_2056
1127794780174295040	@40___HERO ना मोदी को बापू ही बोलती हूँ 😆	NOT	NONE	hasoc_2020_hi_2436
1123816096962895872	RT @swatisharma1009: ये वही भोश्री वाला है ना,,जिसने कहा था,, दुनिया का कौन सा बेटा होगा जो अपनी माँ से मिलने कैमरा लेके जाता है,,👇 https:/…	HOF	PRFN	hasoc_2020_hi_563
1127599057172484097	RT @PGauriTiwari1: फांसी के फंदे को भी ऐसे पापियों से घिन आती होगी इनको चौराहे पर कोङे बरसा के छोड़ देना चाहिए मरने के लिए ताकि जैसे जैसे…	NOT	NONE	hasoc_2020_hi_3327
1127472972191584257	राजीव गांधी के कुकर्म उजागर हुए तो मरे हुए पर राजनीति नहीं होनीं चाहिए। लेकिन वोट मांगनी हो तो मरे हुओं से नाक तक मिला ली जाती है।	NOT	NONE	hasoc_2020_hi_1641
1123637054703788032	RT @ShuhaniVerma: @Dil_se_re_ मै बताऊं क्या करो	NOT	NONE	hasoc_2020_hi_2863
1123628456384679936	RT @ajaysingh0018: चमचे मेरे इस 1 नंबर प्रश्न का उत्तर दे :- 1 मोदी मुस्लिम विरोधी हैं ... यह अभी तक साबित नहीं हुआ है। चमचे साबित करे ? 2…	HOF	PRFN	hasoc_2020_hi_3084
1127626265610129409	@sambit_swaraj1 हर जगह ,,, मुँह डालने का नतीजा यह तो ,,,,,,, होना ही था	NOT	NONE	hasoc_2020_hi_2854
1123622970231009280	RT @PumpiNsui: दिल्ली 7 सांसद,70 विधायक,3 मेयर कोई भी सीलिंग नही रोक पाया फिर बोलते हैं वोट हमे दे बेशर्म मेरा वोट कांग्रेस को	HOF	OFFN	hasoc_2020_hi_1245
1127506732127666176	पैदा करती है परवरिश करती है बोलना सिखाती है अफ़सोस की तुम्हारी गालियों में उसी का नाम आता है	NOT	NONE	hasoc_2020_hi_321
1127508833490706433	@sheriff_eye Bharat Mein Jo Deshdrohi Hai	HOF	HATE	hasoc_2020_hi_1987
1127608498554949632	RT @suresh67890: @narendramodi कौन गरीब है और कौन जुमले बाज वो तो अब जनता ही तय करेगी !! https://t.co/5GTv4hznHx	NOT	NONE	hasoc_2020_hi_1744
1127622742390427648	RT @PoojaSindhwani: साल में एक दिन #MothersDay मनाने से मां का कर्ज पूरा नही होता। मां को तारीखों से नहीं,,,दिल से इज्ज़त और सम्मान दो। यह…	NOT	NONE	hasoc_2020_hi_763
1127809753814405121	RT @SiddharthAulia: याद रखना बिना कर्म के मुक्त नहीं हो सकते हो। पहले कर्म तुमने सकाम किया, फल की प्राप्ति के लिए किया। अब केवल कर्म करने…	NOT	NONE	hasoc_2020_hi_231
1123824955324547072	RT @SShaileshr71: @RubikaLiyaquat ये कांग्रेसी पिद्दी मोदी जी के विरोध में इतने अंधे हो चुके हैं कि देश जाए भाड़ में हमें तो शिर्फ़ मोदी का…	HOF	HATE	hasoc_2020_hi_3880
1123812238169726977	RT @Pinkimishr: श्रीलंका की मस्जिदों में इतने हथियार निकल रहे हैं जबकि वहाँ पे मुसलमानों की संख्या 9.7% है! हमारे देश में क्या हालात हों…	HOF	HATE	hasoc_2020_hi_3370
1127615616280489984	RT @iyashveerraghav: केजरी से लेकर मायावती तक आज दलित - दलित खेल रहे हैं, लेकिन दलितों का भला किसने किया ? 72 घंटों में राजस्थान में 4 बला…	NOT	NONE	hasoc_2020_hi_201
1127778074248994816	@narendramodi आएगा तो मोदी ही, नहीं आया तो घसीटकर लाया जाएगा मोदी को राष्ट्रपति के पास। इस्तीफा देने के लिए! 😂	HOF	OFFN	hasoc_2020_hi_753
1127488264623943680	RT @SapnaChowdharyy: घड़ी का बटन दबाया पर वोट भाजपा को गया:शरद पवार, सतारा सीट भाजपा नहीं शिवसेना लड़ी है फिर भी एकबार ज़हर खाकर देख ले…	NOT	NONE	hasoc_2020_hi_465
1127553548978229248	@SaniaHasan1111 @ArvindKejriwal @AamAadmiParty @msisodia Kuch bi..	NOT	NONE	hasoc_2020_hi_439
1123646563174236160	RT @SureshK89551417: 72,हूरें ,,72 हजार , 72 घण्टे,,72वर्ष ऐसा लगता है जैसे 72 वाला आसमानी किताब का ये अंक ,, हमारे देश के कुछ सेकुलर भाँ…	HOF	HATE	hasoc_2020_hi_438
1127583651502235649	केजरीवाल ने छः छः करोड़ रुपये में टिकट बेचे है, आपियो पूरे दिन लोगो से गाली खाने, धूप में घूमने, कुत्ते की तरह गलियो , watsapp, फेसबुक और ट्विटर पर प्रचार करने के बाद 600 रुपये दिहाड़ी तो मिल ही गयी होगी 😆😆😆😆😆😆😆😆😆😆😆	HOF	OFFN	hasoc_2020_hi_3572
1123814385657548802	@manakgupta @rajnathsingh बिल्कुल सही✔✔✔✔	NOT	NONE	hasoc_2020_hi_3965
1123633699247890433	RT @Sahstraksh: @shaggy26898078 @ijagdishjoshi नहीं रिपोस्टी ये बहुत प्रेस्टीजियस अवॉर्ड है जो कुछ बहुत जबरदस्त कोनटेनट ढूंढने पर दिया जाता…	NOT	NONE	hasoc_2020_hi_3247
1127614391556329472	@RaisinaSeries @RShivshankar *चौकीदार चोर है, से शुरू हुआ चुनाव 😂* *मेरा बाप चोर नही है, पर खत्म हो रहा है😅* https://t.co/pZtBAe6qZ7	HOF	OFFN	hasoc_2020_hi_1573
1123741018887720960	RT @TV9Bharatvarsh: चीन ने वापस ली अपनी आपत्ति, UNSC ने मसूद अज़हर को ग्लोबल आतंकी घोषित किया. #MasoodAzhar	NOT	NONE	hasoc_2020_hi_623
1127555981645205504	@uDoxto0R5lqFRss @Awdhesh36226821 इस धमकी में माँ का प्यार रहता है😊	NOT	NONE	hasoc_2020_hi_2336
1123576912553566208	RT @harishrawatcmuk: अभिव्यक्ति पर नहीं लगेगी पाबन्दी, प्राइवेसी के कानून से मिलेगी हर आवाज को बुलंदी ! क्योंकि #CongressHaiNa #AbHog…	NOT	NONE	hasoc_2020_hi_1774
1127627901392699392	सोनिया चर्च मे फादर: -किसी को सचिन हुआ,विराट हुआ,धोनी, युवराज हुआ 🤗🤗 . . .मुझे पप्पू क्यों हुआ?😏😏 . . . . फादर: अब "हुआ तो हुआ" फालतू में मेरे पे बिल मत फाड़ इसमें तेरा घाटा मेरा कुछ नहीं जाता 🤣🤣🤣🤣🤣🤣🤣 बाकि #आयेगा_तो_मोदी_ही	HOF	OFFN	hasoc_2020_hi_24
1123492527355592705	RT @GauriJalpa: दिल्ली में, अराजक तत्वों द्वारा चर्चकी खिड़की तोड़ दिए जाने पर, आसमान सर पर उठा लेने वाले ईसाई धर्मगुरु, श्री लंकामें 300 ई…	NOT	NONE	hasoc_2020_hi_4128
1127624285898592259	RT @Priyamishra790: कांग्रेसियो की नींद हराम करने वाला दुनिया का सबसे छोटा नारा.... . . . . मोदी...मोदी...😆😂 #ModiAaneWalaHai	HOF	OFFN	hasoc_2020_hi_3870
1127795392538537984	RT @pretty_Shanaya: मुस्कुराहट तुम्ही से मिलती है दर्द की राहत तुम ही से मिलती है रूठना नहीं कभी मुझसे❣ क्यों कि मुझे जीने की राहत तुम…	NOT	NONE	hasoc_2020_hi_1150
1127812484339867648	इस सप्ताह का गलियारा https://t.co/vZKenBhhxw	NOT	NONE	hasoc_2020_hi_4120
1127487618701090817	*🍁👉#पप्पु उर्फ #मनोरंजन लाल #खान गाँधी को "#अब #न्याय #होगा" ऐसी #बात करते हुए #शर्म आनी #चाहिए क्योंकि #इसका #मतलव है की ५५ #सालों से #देश में #अन्याय हो #रहा था👈🍁*	HOF	OFFN	hasoc_2020_hi_4242
1127530690025644033	RT @AnupamUncl: @ReallySwara @digvijaya_28 @INCIndia @RahulGandhi मुझे लगता है बरखा दत्त के बाद अगली पनौती स्वरा भास्कर होगी क्योंकि जिस-जि…	HOF	OFFN	hasoc_2020_hi_3551
1127461974709657600	RT @Mahanaatma1: सुना है "एक भूखा भिखारी" ख़ुदा का नाम ले ले कर मर गया	NOT	NONE	hasoc_2020_hi_1086
1123627755906654208	@nikhildadhich दीवानो से ये मत पूछो दीवानों पर क्या गुजरी है दीवानो से ये मत पूछो दीवानों पर क्या गुजरी है	NOT	NONE	hasoc_2020_hi_2858
1123525771396505600	.@INCIndia की जीत ही न्याय की जीत होगी इसका आश्वासन जनता को देता हूं। https://t.co/Vhx1UFwlXG	NOT	NONE	hasoc_2020_hi_19
1127568258368827392	RT @BJP4India: इनकी नीयत में खोट है। असल में आपका पैसा इन्होंने चुनाव प्रचार में उड़ा दिया है। केंद्र से आदिवासी बहनों और बच्चों के पोषक आ…	HOF	OFFN	hasoc_2020_hi_3711
1127616744527413249	शाम को Patuli Mor पे जाके थोड़ा सा चैन क्या मिलेगा, मादरचोद बूढ़े आलसी साले इंडिया को बेचकर, करप्शन में डुबाकर सीनियर सिटीजन्स की भीड़ पॉलिटिक्स और इंडिया की बातें करते रहते हैं I साले इन मादरचोद बूढ़ो ने ही इंडिपेंडेंस के बाद देश को बेच दिया, कुत्ते साले, मरते भी नहीं है I	HOF	OFFN	hasoc_2020_hi_1263
1127641809717473280	RT @pbhushan1: सूरज के घर में घुसकर मारेंगे। रात में मारेंगे। ठंडा रहेगा, और दिखाई भी नहीं देगा! https://t.co/7S46zwzvWZ	HOF	OFFN	hasoc_2020_hi_654
1127603008177467393	@reza_safiyat @superaman_singh यही राजनीति है, कितनों की मौत हुई कुछ रुक तो नहीं। अगर मेरा पक्ष है तो आपका भी है। बंगाल में रोज़ लोग मर रहे हैं किसी को परवाह नहीं है। त्रिपुरा में जानें तो बची हैं। आयोग दुबारा चुनाव करवा रहा है कहीं विरोध का स्वर नहीं सुना मैंने।	NOT	NONE	hasoc_2020_hi_4362
1127606703380287488	RT @Aastha9305: मायावती ने मुसलमानों को #गद्दार कहा... हम कहते हैं तो बुरा क्यों मान जाते हैं??	HOF	HATE	hasoc_2020_hi_1405
1127803697264713728	RT @AKrisnapriya: 😂लड़कियो से अनुरोध है कि शादी में दुल्हे से किसी भी रकम का मजाक न करे दूल्हे के 👟 जूते न चुराये. क्योकि इसका खामियाजा रा…	NOT	NONE	hasoc_2020_hi_2828
1127646234687094785	RT @Goldenthrust: क्या कह रहा है ये चेहरा😂😂 https://t.co/57SSrvpd8F	NOT	NONE	hasoc_2020_hi_867
1127795254130692098	@KakaliS89206542 @KarnKayastha चार लाइन आपके लिए दिल- ए- तहजीब----- कांच का बदन लेकर मत चला करों कल से, चूर - चूर कर देंगे लोग इसको पत्थर से, आइने की तरह नाज़ुक है ये जवानी तेरी , पत्थरों की तरह लगते है तेरे शहर के लोग।।	NOT	NONE	hasoc_2020_hi_250
1123825789995294722	RT @RAJESHY38489366: समझ नहीं आ रहा कि,🤔 नरेंद्र मोदी ने चीन को कौन सा जूता सुंघाया है कि.. उसकी मिर्गी ठीक हो गई। 😊😆😇 https://t.co/RYjTTza…	NOT	NONE	hasoc_2020_hi_3992
1123570201696423936	@ambedkariteIND नचा तो तेज बहादुर ने दिया सब चौकीदारों को ये तो हल्का सा ट्रेलर था अगर पिक्चर रिलीज हो जाती तो सारे चौकीदारों को पागलखाने में भेजना पड़ता। लेकर मीडिया सेec सब दलाल हैbsdk	HOF	PRFN	hasoc_2020_hi_1437
1123800074683863041	RT @abhishekmsd5: आप का एक वोट आपके बच्चो को नवजोत सिंह सिद्धू की तरह पाकिस्तानी दोगला , हरामखोर , इमरान खान का पालतू कुत्ता बना सकता है।…	HOF	PRFN	hasoc_2020_hi_3736
1127760999258279937	@iSinghApurva @CantstopulovinM @narendramodi उम्मीद है या पक्का विश्वास है दिल्ली के लोग पिछली वाली गलती नहीं करेंगे और आगे आने वाले विधानसभा चुनाव में भी गलती से भी गलती नहीं करेंगे	NOT	NONE	hasoc_2020_hi_2435
1127620787848957952	प्लेन को बादल में छुपवा दिया?? ये आदमी पीएम होकर कैसे इतना झूठ, ऑन कैमरा बेशर्मी से बोलता है? भाई हिम्मत और बेशर्मी की दाद देनी पड़ेगी… @ModiLeDubega https://t.co/82stp0lusP	HOF	OFFN	hasoc_2020_hi_3351
1127778690820001793	Kya naatak hai! 🙈	NOT	NONE	hasoc_2020_hi_832
1127502651086622720	RT @RadhikaChatter5: @SushantBSinha ये है सबूत राजीव गांधी INS विराट को टेक्सी बना कर अपने दोस्तो के साथ छुट्टियां मनाने गये थे 😬 https://…	HOF	OFFN	hasoc_2020_hi_1936
1127483105638375424	RT @SengarAjay505: @ArvindKejriwal आज मैने मोदी जी को केवल वोट ही नही किया बल्कि सेना से सबूत माँगने वालो के मुँह पर करारा तमाचा मारा है👍	NOT	NONE	hasoc_2020_hi_613
1123809302181969930	सिर्फ़ सरकारें बदलती हैं हालात नहीं बदलते l कांग्रेस शासित राजस्थान की जेल में फिर एक मुसलमान क़ैदी की हत्या (लिंचिंग) l कांग्रेस शासन में राजस्थान में तीसरी लिंचिंग हो गई कांग्रेस सिर्फ भाजपा का डर दिखाकर वोट लेती है! बोलो कांग्रेसियों क्या इसीलिए तुम्हें वोट दिया गया था?	HOF	HATE	hasoc_2020_hi_489
1127560947713937409	@MaryamNSharif Hahaha khaab dekhna achi bt hai..	NOT	NONE	hasoc_2020_hi_3246
1123592028837670915	@AakankshaCharu @capt_mishra मैं लगभग निंदा करता हूँ	NOT	NONE	hasoc_2020_hi_2429
1127806645847842816	RT @GraphicsMahi: दुष्यंत चौटाला जी को 5 साल बाद समझ आ ही गया कि #barwala में जो नरसंहार हुआ उसके लिए दोषी हरियाणा की भाजपा सरकार है.... ht…	HOF	HATE	hasoc_2020_hi_1058
1127795887470571520	RT @ashokshrivasta6: नेताओं के हल्के-फुल्के पल/चुनाव में या यूं भी दिखाना हमेशा होता रहा है। इसमें कुछ गलत नहीं। लेकिन दिक्कत ये है कि मोदी…	NOT	NONE	hasoc_2020_hi_1027
1127793115035602946	RT @Sunnydeolsir: कल होटल खाना खाने गया ,वेटर खाना लगाकर जाने लगा तो मेंने उसे कहा इसमें दो काँग्रेसी कम हे।। उसने फटाक से दो चम्मच लाकर रख…	NOT	NONE	hasoc_2020_hi_1875
1127482979792461824	RT @BJP4India: कांग्रेस कहती है कि वो हमारे सैनिकों को मिला सुरक्षा कवच, उनको मिला विशेष कानून ही हटा देगी। कांग्रेस कह रही है कि वो देशद्…	NOT	NONE	hasoc_2020_hi_652
1127527779145211905	@sana_100k इनकी पैदा बार ही चूतिया परिवार से हुई है 😂😂😂😂😂😂😂😂😂😂😂	HOF	PRFN	hasoc_2020_hi_3434
1127613561075843074	GOOOOOLAZO DE BRAHIM	NOT	NONE	hasoc_2020_hi_2147
1127533877671546880	आज जो संतानें "mother's day" मना रहीं हैं उनसे पूछना था कि अगर उनकी माताओं ने उसी एक दिन उनकी देखभाल की होती, लालन-पालन किया होता और दूध पिलाया होता तो क्या वे इतने सालों तक अपना बर्थडे मना सकते थे? हर दिन मां का दिन है।	NOT	NONE	hasoc_2020_hi_1723
1127588080683180032	@ModiLeDubega बेशरम नहीं तो भाजपा नहीं बेशरम नहीं तो संघी नहीं बात ख़तम	HOF	HATE	hasoc_2020_hi_3568
1127554568168984576	RT @RajeshChaubey12: 🍁🍁 शीशा और पत्थर संग संग रहे तो बात नही घबराने की, शर्त इतनी है कि बस दोनों ज़िद ना करे टकराने की..!!! रिश्ता होने से…	NOT	NONE	hasoc_2020_hi_3786
1127614022457495557	आख़िर जीजा जो लगते है पागल के तो ईनकी ग़लती नही है सब संगत का असर है	NOT	NONE	hasoc_2020_hi_22
1123481756391309315	RT @AjiHaaan: NDTV वालों के लिये खुशखबरी आने वाली है 22 मई की शाम तक अचानक करोड़ों लोग 1 दिन के लिए चैनल सब्सक्राइब कर लेंगे 😁	NOT	NONE	hasoc_2020_hi_4032
1127506270762590208	RT @RinkuSharma0123: सनी देओल के रोड शो में एक महिला ने जीप में चढ़कर सनी देओल को पप्पी किया एक हमारे घुँघरू सेठ है जिसे जूते खाने से फुर…	HOF	OFFN	hasoc_2020_hi_3206
1127596976793473024	RT @keshavyadaviyc: मोदी तुम ने साबित कर दिया कि तुम महा धूर्त और महा धोखेबाज आदमी हो। लगता है कि गोलवारकर की किताब तुम पढ़ कर आए हो ,उसमें…	HOF	OFFN	hasoc_2020_hi_302
1127492916090265600	RT @MiniMuvel: निर्भया को देश की बेटी बताया, और अलवर मे दलित की बेटी वाह रे दलाल मिडीया	HOF	PRFN	hasoc_2020_hi_1363
1123537473542320128	RT @NyLahBaLoch: झाड़ू "आप पार्टी" का है, लगा मोदीजी रहे हैं, साफ‌ कांग्रेस हो ‌रही है, पेट में दर्द ठगबंधन वालों को हो रहा है, और मजा…	NOT	NONE	hasoc_2020_hi_2457
1127568149338042368	RT @ptshrikant: प० बंगाल में ममता दीदी की राजनीतिक जमीन खिसक गई है। उनके अराजक लूटतंत्र से त्रस्त जनता चुपे-चाप कमल छाप रही है। बौखलाहट में…	NOT	NONE	hasoc_2020_hi_337
1127460825470341120	RT @Dharmraj7265: CRPF के डीजी का बयान- बंगाल की जनता खूलकर करें मतदान जहां मिलेंगे ममता के गुंडे वहीं कर देंगे, उनका काम तमाम!	HOF	HATE	hasoc_2020_hi_3724
1127537921005723648	@rssurjewala कुछ भी बोलो, मोदीजी ही आयेंगे।	NOT	NONE	hasoc_2020_hi_3329
1127535060469596160	@alok_ajay @RahulGandhi @yadavtejashwi 23 मई को बेहोश न हो जाना।	NOT	NONE	hasoc_2020_hi_1985
1127767001290526720	@narendramodi गधों की सोच नहीं चाहिए हमें अपनी सोच अपने पास रखो मोदी साहिब अगर हिंदूवादी सोच इतनी अच्छी होती तो सावरकर जैसे अंग्रेजों के तलवे न चाटते	HOF	PRFN	hasoc_2020_hi_3389
1123510202169303040	RT @Rajendra_inc: 1-जेट एयरवेज़ बन्द 2-एयर इंडिया भयंकर घाटे में 3-BSNL के 54000 रोज़गार ख़तरे में 4-HAL के पास सैलरी देने को पैसे नहीं 5-…	NOT	NONE	hasoc_2020_hi_937
1123655677396656128	@msisodia @ArvindKejriwal ये बड़ा गलत किया मोदी जी... जिन लोगो की औकात 2 कौड़ी की भी नहीं है उनके लिए 10 करोड....!! बस केजरीवाल जी को दो चार देसी के खंबे 🍾🍾🍾🍾 पहोचा देते पूरी पार्टी नागिन डांस करते हुए चली आती..	HOF	OFFN	hasoc_2020_hi_1159
1123675948484837377	RT @PrakashJavdekar: हाल हीं में श्रीलंका में जो बम धमाके हुए थे उसके बाद वहां की सरकार ने जाकिर नाइक के टीवी चैनल पर बैन लगाने का फैसला कि…	NOT	NONE	hasoc_2020_hi_3165
1123808534607597570	RT @Poojasocialist: वनारस मोदी की रैली में अगर आये तो पैसा घर पहुँच जाएगा 🤣 कहा है चुनाव आयोग , अब जिंदा नही होगा चुनाव आयोग https://t.co/d…	HOF	HATE	hasoc_2020_hi_3796
1127798789908123649	RT @deepupaul2: @SaritaHooda_ UPA आ रही हैं NDA जा रही हैं 😂 😂 😂 😜 😜 😜 @SaritaHooda_ सरिता जी की डायरी से 🙊🙊🙊	NOT	NONE	hasoc_2020_hi_1198
1123658760231067649	@ZeeNewsHindi मसूद का वैश्विक आंतकवादियों में नाम आ गया पता करो यू-एन में चुनाव आ गया क्या.. ~आहत इंदौरी 😂😂	NOT	NONE	hasoc_2020_hi_2045
1127587153746128896	@Swamy39 @sureshr69 पिछले लोकसभा चुनावों मे मोदी जी की तुलना चायवाला-नीच आदि से कर चुनाव का ध्रुवीकरण करने वाले मणिशंकर अय्यर जी को शायद इसबार सांप सूंघ गया,कुछ बोलते क्यों नहीं? Twitter पर अपना एकाउंट भी नही बनाया, क्या इतनी ज्यादा फट गई है उनकी? @NandiGuptaBJP @SureshKKhanna	HOF	OFFN	hasoc_2020_hi_312
1127780406294532096	RT @jyoti_Jk06: #AWMU उसे मैं तब याद आती हूँ जब उसके पास कोई दुसरा नही होता💔 #ज्योति #अधूरे_जज़्बात @jyoti_Jk06 https://t.co/d15HypC1…	NOT	NONE	hasoc_2020_hi_3828
1127637489575817216	RT @RishiMishra_: आज 6 चरण के बाद भाजपा ने 272 सीटो का बहुमत अपने दम पर क्रोस कर लिया है और NDA 320+ सीटो को क्रोस कर चुका है आने वाले 7 औ…	NOT	NONE	hasoc_2020_hi_1374
1127500138702942208	Jo chupanay ka maza hai wu chukanay mein nai!	NOT	NONE	hasoc_2020_hi_3619
1127578798684164097	पित्रोदा और अय्यर वाली लिस्ट में अब खड़गे का भी नाम शुमार होगया अगर काँग्रेस की 40 से ज्यादा सीटें आई तो मोदी खुद को दिल्ली के विजय चौक पे लटकेंगे क्या ? ये खुद इसने अपनी कन्नड़ भाषा में कहा तो कांग्रेस ये बहाना नही बना सकती कि हिंदी कमजोर इसलिए गलत बोल दिया हार की बौखलाहट https://t.co/r5DHUCUn4q	HOF	OFFN	hasoc_2020_hi_1606
1127614274115756035	RT @shakilpatel86: राहुल और मोदी में यही फर्क है कि. राहुल के बाप का नाम पूरा विश्व जानता है. और मोदी के बाप का नाम खुद मोदी भी नहीं जानता.…	HOF	OFFN	hasoc_2020_hi_4107
1127472863139622917	RT @SarojGi28026442: हिंदुस्तानी सावधान रहें अपने ही धर्मगुरुओं पर लगे आरोप सच्चा मानकर हंसी मजाक नही उड़ाये और अपने धर्म का नाश नही क…	NOT	NONE	hasoc_2020_hi_211
1127515548584038400	कितना सन्नाटा है..... कोई डिबेट नहीं.... कोई ट्वीट नहीं कर रहा है... लोकशाही को कोई खतरा नहीं है? 😁😁😁😁😁	NOT	NONE	hasoc_2020_hi_2652
1127776396514775040	हिन्दुओं कब समझोगे पहले ही पाकिस्तान खो दिया अब हिन्दुस्तान मत खोना	HOF	HATE	hasoc_2020_hi_3542
1127533072360939527	RT @Aashu89995: हाथ पकड़ा, बात की, फिर गले लगा लिया, तीनो खंजर एक साथ मारे थे जालिम ने.. https://t.co/lwwPUdhEOM	NOT	NONE	hasoc_2020_hi_4146
1127675456424034304	RT @_BharatGajjar: वो जो न आने वाला है, उससे मुझको मतलब था आने वालों से क्या मतलब? आते हैं आते होंगे! #एलिया	NOT	NONE	hasoc_2020_hi_65
1127519034029690880	कोई नहीं मिला तो मैं आ जाता हूँ	NOT	NONE	hasoc_2020_hi_1072
1123792688522964993	RT @NareshD95355946: #WednesdayWisdom गीता जी का ज्ञान देने वाला भगवान कह रहा है अर्जुन मेरी उत्पत्ति को ना देवता जानते हैं और ना ही ऋषिमु…	NOT	NONE	hasoc_2020_hi_4180
1123634554898534400	@RPDULAR @SUBHASH_SHARMA1 अगर रोहंगिया मुसलमानों को भगाया नही गया तो,श्रीलंका में आज जो हो रहा है उससे कहीं ज्यादा भयानक भारत में होगा और यह होना निश्चित है	HOF	HATE	hasoc_2020_hi_2198
1123785944094642177	हाँ, जरूर।	NOT	NONE	hasoc_2020_hi_2957
1127475060933922816	ऐसा लग रहा है जैसे पं बंगाल मे रक्षस राज चल रहा है...ममता सरकार राक्षसों की तरह व्यवहार कर रही है और उनके कार्यकर्ता नरभक्षी हो चुके है...सैकड़ों जानें सिर्फ चुनाव जीतने के लिए ले लिया गया है।	HOF	HATE	hasoc_2020_hi_4300
1127528093734752256	@ROJE97AS Hai rojee	NOT	NONE	hasoc_2020_hi_2303
1127610444712071168	RT @sunerdhakad: ,,जीवन मे बहुत कुछ देखा है ,बस अब यही ,देखना बाकि था ।😀😁😂😉😋 👇👇👇👇👇👇👇😝😂😛 https://t.co/mOy87SOfsL	NOT	NONE	hasoc_2020_hi_1292
1127509487793737728	RT @WasiuddinSiddi1: राहुल गाँधी और रविश कुमार को एक साथ देखना महज एक संयोग नही लोगों की डिमाण्ड थी जिसे पूरा करके राहुल गाँधी ने साबित कि…	NOT	NONE	hasoc_2020_hi_838
1127607919720243200	गोरी है कलाइयां पहना दूं तुझे हरी हरी चूड़ियां अपना बना लू तुझे बालमा ।। 💞	NOT	NONE	hasoc_2020_hi_3176
1127645160936861696	हुआ था जो इश्क मुझे, उसे दो तरफा क्यूँ लिखूँ.. तुम तो मंजिल थी ना, फिर तुम्हें हमसफर क्यूँ लिखूँ"?	NOT	NONE	hasoc_2020_hi_1394
1123640053622685696	RT @ysurendra7013: @alokdubey1408 नही तो दलाली करने के छोड़ दे।	NOT	NONE	hasoc_2020_hi_2140
1127599606626275329	रीता बहुगुणा की लाटरी लगने वाली बात मुझे हजम नहीं हो रही	NOT	NONE	hasoc_2020_hi_2697
1123810040371195911	तुम जैसे गाद्दर जब तक देश मे मौजूद हे तब तक इन नक्सलियों का आतंक जारी रहेगा जब तुम लोग जनता का विश्वास नही जीत पाये तो अब तुमने आतंकवाद ओर नक्सलियों का सहारा लेकर मोदिजी को बदनाम करना सुरु कर दिया।	HOF	HATE	hasoc_2020_hi_3861
1127505058629804032	@irvpaswan @narendramodi @iramvilaspaswan मा.बहन जी ध्दारा @narendramodi की जाती को लेकर आलोचना करना तूम जैसे दलालों के पीछवाडे पर लात मारना है कुछ समझे की नाहीं बुड़बक।	HOF	HATE	hasoc_2020_hi_1085
1123541927884873729	RT @Interceptors: शहरी इलाकों में बोरिंग ban है। पर अब हर जगह लोग पानी के लिए बोरिंग करवा रहे है। इसमें विभाग वाले ही ठेका ले रहे है। लो…	NOT	NONE	hasoc_2020_hi_4355
1127484921755209728	RT @nidhidynamic: जिसके हाथ में छाले हैं पैरों में बिवाई है उसी के दम से रौनक आपके बंगले में आई है इधर एक दिन की आमदनी का औसत है चवन्नी…	NOT	NONE	hasoc_2020_hi_129
1127782507649175552	RT @hdhingra: आपको कैसा लगेगा अगर इन्होंने ने भी यह कूड़ा आपके घर मे डाल कर चले जाएं, जैसे हम कचरा व कूड़ा डाल देते है इनकी जगह पर और चले…	NOT	NONE	hasoc_2020_hi_3307
1127472355633065984	RT @TheFauxyHindi: बाज़ार में अपने पति श्री राम सिन्हा को आवाज़ लगाई तो बंगाल पुलिस ने लिया पत्नी को हिरासत में। https://t.co/Oo50A32nhr	NOT	NONE	hasoc_2020_hi_91
1123570210055905281	RT @aajtak: #LokSabhaElections2019 @RahulGandhi ने कहा, '2019 के चुनाव में कांग्रेस पार्टी मोदी को हरा रही है' https://t.co/RC35eY8pMJ	NOT	NONE	hasoc_2020_hi_952
1127636243850956802	RT @prena_: सरकार कुछ नहीं कर रही , स्थानीय प्रशासन खामोश है। @PoliceRajasthan कहाँ है पता नहीं। पापा और भाई को हिंदी नहीं आती, किससे सम्प…	NOT	NONE	hasoc_2020_hi_1381
1127512012764749824	RT @SomSinghThapa1: 🙏🏻🙏🏻शुभप्रभात🙏🏻🙏🏻 मैं जीवन की हर हल चल में कुछ पल सुखमय, अमरण अक्षय, चुन लेता हूँ। मैं जग के हर कोलाहल में कुछ स्वर म…	NOT	NONE	hasoc_2020_hi_4279
1123580930705088513	RT @neo_pac: ६० सालों में क्या हुआ मोडि को अटलजी से पूछना चाहिए था https://t.co/eOjVirHaOS	NOT	NONE	hasoc_2020_hi_440
1127608972502953984	RT @cutesoniass: पिता को चोर कहने पर इतना गुस्सा आ रहा है तो जब माताजी की कुंडली खुलेगी तब तो भूचाल आ जायेगा😂😝😝😂😂	HOF	OFFN	hasoc_2020_hi_821
1123783234557501444	अगर 2019 के चुनाव में भाजपा हार जाती है तो मोदी का चेहरा कैसा होगा? के लिए रवि ठाकुर (Ravi Thakur) का जवाब https://t.co/1fWXTncTJ0	NOT	NONE	hasoc_2020_hi_640
1127764123997982722	RT @ameytirodkar: ....और लोग पूछते हैं की मोदीजी प्रेस कॉन्फरंस क्यू नहीं करते? वो थोडी ना ऐसी scripted होगी?! https://t.co/LZSGMdEzuD	NOT	NONE	hasoc_2020_hi_3019
1127476558304825345	RT @narendramodi_in: ये मजबूत सरकार है तभी भ्रष्टाचार पर कड़ा प्रहार हो पाया है। हर तरह के कानून बनाकर हमने भ्रष्टाचारियों का जीना मुश्किल…	NOT	NONE	hasoc_2020_hi_3772
1127796445317255168	RT @parvezpathon1: मोदी ने कहा- मैंने #वायुसेना को बादलों से फायदा मिलने का सुझाव दिया था, ओवैसी बोले-आप गजब के एक्सपर्ट हैं नाम के आगे #…	NOT	NONE	hasoc_2020_hi_4302
1127562642229325824	RT @anasinbox: हम एक ऐसे देश में रहते हैं जहां का प्रधानमंत्री टीवी इंटर्व्यू में कहता है कि बादलों में जहाज़ जब उड़ते हैं तो उसे राडार न…	NOT	NONE	hasoc_2020_hi_453
1123796824106655749	RT @ibhagwa_n: बच्चों से गाली गलोच करवाते देखकर शायद PM श्री @narendramodi जी मैडम @priyankagandhi वाडरा जी से सिर्फ़ इतना ही कहते 👇 नफ़…	HOF	OFFN	hasoc_2020_hi_3623
1127622935349358592	#IPL2019Final is baar umpire Kahan bechne hai?	NOT	NONE	hasoc_2020_hi_1479
1127468933089390592	@divyaspandana @Bhayankur राजनीति में एजुकेटेड आदमी को radar कैसे काम पता होना चाहिये? परंतु M.Phil वाले गधे को दिन में 25 घंटे होते है इतना ज़रूर पता है	HOF	PRFN	hasoc_2020_hi_2607
1127612571203145728	@PAWANARORA90348 @mlkhattar तब कोर्ट में मुख्यमंत्री नहीं वो डीसी होता अपनी बेल करवाने के लिए, उसकी नौकरी भी छीन ली जाती।	NOT	NONE	hasoc_2020_hi_985
1127466064172933120	RT @shaktisinhgohil: ना मोदी सवर्ण को देना चाहते है और ना पिछड़े को। ना वो राम के हैं ना रहीम के हैं। वो सब कुछ वोट बैंक के लिए करते हैं। ह…	HOF	OFFN	hasoc_2020_hi_1599
1123599494677921792	RT @Republic_Bharat: #ModiCrushesPak | क्या मोदी की जीत से खामोश हो गया विपक्ष? देखिए- 'पूछता है भारत', अर्नब के साथ सिर्फ रिपब्लिक भारत पर…	NOT	NONE	hasoc_2020_hi_1425
1127509189989945344	RT @Dil_Se_Ree: @MohanBubna @JhaSanjay ईस ग़रीबों के स्टीव जोब्स को कोई बताओ की मोदी ने क्या किया है वो जनता जानती ही है ॥ २०१४ में तो सिर्…	NOT	NONE	hasoc_2020_hi_1030
1127539376429252609	@sampitroda भैया अब तो राजीव जी का बाहर निकाल लो कब तक मुंह में लेकर घूमोगे	HOF	OFFN	hasoc_2020_hi_4034
1127806733940695040	@the_hindu Communist मानसिकता है इसकी, देश में इनके जैसे लोग हो तो देश को बाहर के दुश्मनों की जरूरत है नही। shame on u.	HOF	HATE	hasoc_2020_hi_4405
1127798840260792321	@P_Katyayan इधर कितना अकेला मैं उधर है तू कहीं अम्मा, मुझे सब लोग कहते हैं कि तू अब है नहीं अम्मा, महकता है ये घर आँगन तेरी ममता की खुशबू से, मैं कैसे मान लूँ दुनिया में अब तू है नहीं अम्मा !!	NOT	NONE	hasoc_2020_hi_3959
1127561790781444096	RT @seemaadhikari: मोदी जी शर्म क्यों नहीं आती है / जब सत्तासी साल की बूढ़ी माँ नोट की लाइन में लग जाती है ? मोदी जी आप सपूत हो की कपूत हो…	HOF	OFFN	hasoc_2020_hi_3191
1123675390621442052	RT @moronhumor: @msisodia मुझे ऐसा क्यूँ लग रहा है की शायद ये वही 7 विधायक हैं जिन्होंने हाल ही में सड़ जी की 10-10 लात और 10-10 कोड़ों से…	NOT	NONE	hasoc_2020_hi_818
1127749666236321792	आदमखोर भी दिल की बात करने लगा । बस कर !	HOF	HATE	hasoc_2020_hi_802
1127723007219093504	RT @DevendraDass4: #Allah_Kabir #जीने_की_राह सात समंदर की मसि करौं लेखनि सब बनराइ। धरती सब कागद करौं हरि गुण लिखा न जाइ॥ साधू गाँठ न…	NOT	NONE	hasoc_2020_hi_2119
1127504249124900866	RT @namittyagi220: मशहूर अभिनेता अरुण बक्शी ने बीजेपी का दामन थामा, @SudarshanNewsTV से की खास बातचीत सुनिए क्या कहा उन्होंने इस खास इंटरव्…	NOT	NONE	hasoc_2020_hi_4294
1123488756688986112	@DrSanja15467398 सर जरूर आप इस्लाम मे दाखिला लीजिए आपका तहे दिल से इस्तकबाल करते है लेकिन सर इस्लाम मे दाखिले की शर्त है कि आप सहर्ष बिना किसी दबाव के सच्चे दिल से इस्लाम को कबूल करेंगे तो ही आपका इस्लाम मे दाखिला होगा अल्लाह आपकी इस्लाम कबूल करने की हिम्मत मे और ईजाफा करे आमीन	NOT	NONE	hasoc_2020_hi_2126
1127472091383517184	भ्रष्टाचार विहीन सरकार कैसी होती है इसका उदाहरण देश में पांच साल में देखने को मिला है: श्री @AmitShah #MeraVoteModiKo https://t.co/EKk7JW5LeC	NOT	NONE	hasoc_2020_hi_4395
1127534188046036992	RT @AshrafFem: मैं माँ को प्यार करता हूँ, सिर्फ इसलिए नहीं कि जन्म दिया है उसने मुझे! मैं माँ को प्यार करता हूँ, सिर्फ इसलिए नहीं कि पाला-…	NOT	NONE	hasoc_2020_hi_2357
1123623645505622016	RT @erbmjha: बच्चों को कैसी भाषा सीखा रही कांग्रेस मोदी से नफ़रत में बच्चों को तो मत बर्बाद करो https://t.co/HsMvHsY2lC	NOT	NONE	hasoc_2020_hi_1129
1127637929960992770	@pawanpandeysp @anilgupta6633 @yadavakhilesh @ajitanjum जब दिमाग मे गोबर होता है ना तो ऐसी ही बाते करता है इंशा अल्लाह 400000 वोट से हारेगा	HOF	OFFN	hasoc_2020_hi_935
1127547643381469186	RT @kyamat01: आज अगर चेन्नई सुपर किंग्स जीत गयी तो🙌🏻🙌 🏻 मै13 मई Twitter पे भंडारा दूगी 😋😋 फिर मत कहना बताया नही 😊😊😊🙈 #कयामत Follow = fol…	NOT	NONE	hasoc_2020_hi_4360
1127498981070606336	@AcharyaPramodk 23 मई को नानी के साथ सब कुछ याद आयेगा पर मा नही आयेगी । पप्पू के साथ नानी के घर चले जाना ।	NOT	NONE	hasoc_2020_hi_4095
1123771830257508355	RT @Lohia_Krishna_: चौकीदार को चोर कहने पर राहुल गाँधी ने 1 नहीं 2 बार नाक रगड़-रगड़कर माफी माँगी... अब बताओ फेंकू कौन..??😊 #मोदी_है_तो_मुम…	NOT	NONE	hasoc_2020_hi_3040
1127509433293135872	RT @ChaturvediS2: कहतई बौरा (गूंगा)सुनतई बहरा,,, ,, चौबे दद्दा कहें कहानी,,3 लाइन की एक कहानी,, एक था राजा एक थी रानी,, फट गया राजा, बच गई…	NOT	NONE	hasoc_2020_hi_4110
1127813629384982529	@Asif_Ukhan @adeel_azhar 21saal ka tajarba hai	NOT	NONE	hasoc_2020_hi_3501
1127471890061090816	RT @dr_dey_subodh: अमसीपोरा,शौपिया काश्मीर इस्लामिक स्टेट राज्य घोषित हत्यावादी,अरबीबाबा आतंकी ग्रुप IS का दावा मुसलमान🙏 एकजुट होकर धरतीचप…	NOT	NONE	hasoc_2020_hi_2583
1127664014337527808	#mothersday हर युग में मात पिता मिल सकते हैंसतगुरु और सेवा और बंदगी यह बड़ी मुश्किल से मिलते हैं इसीलिए परम पिता परमेश्वर का सबसे ऊंचा स्थान बताया है https://t.co/kAMgWPT1Tz	NOT	NONE	hasoc_2020_hi_3199
1127544006911643650	RT @dr_dey_subodh: जेहाद,हत्यावादी बलात्कारी विदेशी अरबीबाबा कारनामा ! अमसीपोरा,शौपिया!काश्मीर मे इस्लामिक राज्य ?! इस्लामिक स्टेट IS का…	HOF	PRFN	hasoc_2020_hi_2953
1127491049637593088	RT @chandsharma1995: तुम इतनी क्यों मुहब्बत हमसों करें हों हम तो जाय ही रहे हैं ये दुनिया छोड़ तुम इतनी काहे हमारी #तरफ़दारी कर रहे हों ht…	NOT	NONE	hasoc_2020_hi_1202
1127606934062809088	RT @VishalSatra1: @ArvindKejriwal तौबा तौबा घुंघरू सेठ तुमने तो इन पाँच सालो में जूठी बच्चो की कसमे खायी 80 हजार की दारू की बोटल गटक गये…	HOF	OFFN	hasoc_2020_hi_653
1127617499502014464	ग़लती करके छिपाते थे जब पकड़े जाते थे तेरे आंचल में छिप जाते थे तेरे आंचल में खुद को बड़ा महफ़ूज़ पाते थे हमारी हर कड़वी बात को हंस कर सह जाती हैं हमारी हर गलती पर बड़े प्यार से समझाती है Happy Mother's Day	NOT	NONE	hasoc_2020_hi_1937
1127465317578543104	@Squirrel_Soul मर गया क्या?	NOT	NONE	hasoc_2020_hi_2542
1127725838399488000	RT @PUBG_BABA: @Chanuangel143 यही एडमिन हैं क्या👇 😁😁😁😉 👇👇👇👇👇👇 https://t.co/HIs4KehcZm	NOT	NONE	hasoc_2020_hi_73
1123492934190542848	RT @PoonamRathore25: @Mayawati आपको धमकी लगता है कमाल है पर सोच अपनी अपनी खैर... मोदी आ रहे हैं 23 मई को स्वागत किजियेगा जरूर 🙏🙏🌿🍁🌿	NOT	NONE	hasoc_2020_hi_2913
1123648303814414337	बी जे पी तो मुफ़्त मे भी ना ख़रीदे ये तो इन गिरगिटों की अपनी बिकने की क़ीमत बताने का तरीक़ा है ताकि अगर कोई ख़रीदना चाहे तो ख़रीद सकता है	HOF	HATE	hasoc_2020_hi_3315
1127783916931125248	@PMOIndia आदरणीय मोदी जी सुब्रत राय सहारा से पेमेंट कराइये , पूरे देश में करोड़ों जमाकर्ता बहुत परेशान है आत्महत्या तक कि नौबत आ गई है , रोजमर्रा के खर्चे तक नहीं पूरे हो रहे हैं,सड़क पर ला दिया है सुब्रत राय ने । अब केवल आप ही हम सब का सहारा हैं 🙏	NOT	NONE	hasoc_2020_hi_1131
1127787293320704000	@ECISVEEP ये क्या हो रहा है? और हम लोकतंत्र की दुहाई देते नही थकते	NOT	NONE	hasoc_2020_hi_923
1127538139105382400	RT @ahanafatima786: मुझे मौत से इतना डर नहीं लगता जितना मां बाप के बिना इस दुनिया में जीने से लगता है... अल्लाह पाक सबके वालेदीन को सलामत र…	NOT	NONE	hasoc_2020_hi_2182
1127549962819125248	RT @SureshK96925115: इस से बड़ा गद्दार पाकिस्तान में भी नही ह https://t.co/KmH2bZ2wrE	NOT	NONE	hasoc_2020_hi_3969
1127792276162236417	@i_theindian @RahulGandhi पप्पू भगवान के घर जाएगा 🌹 🌹 🌺 💦 💞 मोदी ही तो आएगा	NOT	NONE	hasoc_2020_hi_2480
1123817959225470979	RT @MFlOGbBWCnfpLih: #वेद_मेरा_भेद_है कबीर जी ने समझाया है कि हे मानव शरीर धारी प्राणी! यह मानव जन्म बहुत युगों पर्यन्त प्राप्त होता है। त…	NOT	NONE	hasoc_2020_hi_3538
1123510034388750336	@aajtak सही है.. जुमलेश्वर जनता के चुने हुवे प्रतिनधि और जनता की चुनी हुई राज्य सरकारों का सम्मान भी करना नही जानता.. जुमलर्श्वर खुद को सबसे बड़ा और महान समझने लगा है.. यर देश के लिए खतरनाक है.. जनता से निवेदन है कि चुनाव में इस फेकू जुमलेश्वर को ज़ोला थामकर बाहर निकालो...	HOF	OFFN	hasoc_2020_hi_1345
1127798148204621824	@TheCommunicati3 लगता है आप बिलियर्ड्स खेलते हैं... 😊	NOT	NONE	hasoc_2020_hi_2246
1127555860035563521	RT @Dilsedesh: GS @priyankagandhi : अगर 50 घंटे की तपस्या कर ली होती तो इस तरह की नफरत से भरी बातें नहीं करते PM। किसी बात का जवाब नही देते…	NOT	NONE	hasoc_2020_hi_134
1127522926348066816	@SheilaDikshit @ArvindKejriwal सठिया गया है केजरी	HOF	OFFN	hasoc_2020_hi_4023
1123823193708466176	@anuraagmuskaan टोपा हो का 😜😜😜😜	NOT	NONE	hasoc_2020_hi_3252
1127806402569760768	मुफ़लिस जो अगर तन की क़बा बेच रहा है; वायज भी तो मिंबर पे दुआ बेच रहा है ; दोनो को है दरपेश सवाल अपने शिकम का ; एक अपनी खुदी , एक ख़ुदा बेच रहा है : @MrinalPande1 @khanumarfa @kavita_krishnan	NOT	NONE	hasoc_2020_hi_97
1123559812376064001	श्रीमान मेंरी सरसो नहीं बिक रही ह अबी तक कोई बी सोलुशन नहीं हुआ ह कर्प्या करके मेरी सहयाता करो | काफी बार सिक्यात कर चुका हु Aaddar number - 619654032923 Mobile number - 9416150122 Registration nuber - Mah/2018/887283	NOT	NONE	hasoc_2020_hi_824
1127467184052006912	अपनी प्रोफाइल पिक तो देख पिद्दी सरदारा, किस की लगा रखी है, तू सच में सिर्फ भौंकने के लिए रख रखा है कांग्रेस ने, बाद में गाली किसको पड़ती है, में तो कहता हूं, पूरा दिन भोंका कर तेज तेज 😂😜	HOF	OFFN	hasoc_2020_hi_1673
1123756466530324481	@gupta_salma @Uzmapakiza आजा डीएम में। मर्द की तरह बात करेंगे। फॉलो कर दो यार	NOT	NONE	hasoc_2020_hi_1012
1127489619371540480	तुमसे बढ़कर कुछ नहीं #माँ #Happy_Mothers_Day https://t.co/vft3S4g7jD	NOT	NONE	hasoc_2020_hi_2820
1127789721831104512	@Biorahul तुम लोग खुद ही लिख लेते होंगें। बाकी लोगों के पास इतना टाइम कहाँ होता हैं। 🤓	NOT	NONE	hasoc_2020_hi_1351
1123568804968091648	@Rampuniyani1945 नेहरु	NOT	NONE	hasoc_2020_hi_3349
1127479943107997696	@Atheist_vashali @IntolerantMano2 अगर आप चाहो तो हर हर मोदी ग्रुप में ज्वाइन कर सकते है। निचे क्लिक करें 👇👇👇👇👇 https://t.co/ZbadK8ONbv	NOT	NONE	hasoc_2020_hi_2200
1127623207979118593	@dibang सिद्धू की धुलाई कर के आ रहे हो	NOT	NONE	hasoc_2020_hi_3617
1127576068167163904	@arshiazizkhan @yadavakhilesh इसका दिमागी सन्तुलन बिगड़ गया है इसको वो टीका लगाया जाए जो कुते के काटने के बाद लगाया जाता है लगभग तीन साल तक लगवाना पड़ेगा शायद २३-५-१९ के बाद लगातार दौर शुरू हो जाएंगे	HOF	OFFN	hasoc_2020_hi_1210
1127786727110656001	RT @jigneshmevani80: ऐसा लगता है कि गुजरात और राजस्थान से सारे प्रगतिशील लोग मंगल ग्रह पर शिफ्ट हो गए है। तभी तो घोडी चढने के मामले में और…	NOT	NONE	hasoc_2020_hi_892
1127599145244446720	RT @SChaudharyINC: जो बड़े वृक्ष होते हैं वो ही अक्सर अपनों के बीच झुका करते हैं और ऐसे नेता राजनीति में देखने को बहुत कम मिलते हैं, विकास…	NOT	NONE	hasoc_2020_hi_126
1127640425601191936	RT @Airavta: मोदी जी - मैं बचपन में गोरा उड़, काला उड़ खेला करता था, इस तरह मैन रडार और क्लाउड टेक्निक सीख ली। रुबिका - सर, थकते नही है आप?	NOT	NONE	hasoc_2020_hi_3761
1127744138156204032	@firstpost @ITBP_official फैल, मिस्ड, next टाइम मजाक बना कर रख दिया है, प्रेश्याऔ ने संविधान की चुनाव प्रक्रिया का खुद करे तो पाक, दूसरा करे तो साफ	NOT	NONE	hasoc_2020_hi_3208
1127713242875195393	@abhisar_sharma धीरे से अपने पीछे घुसा ले ...दलाल	HOF	PRFN	hasoc_2020_hi_1618
1123647020336435200	RT @Being_Humor: Hello @RahulGandhi Sooji hai ? 😹😹 https://t.co/00OXZoZ0qu	NOT	NONE	hasoc_2020_hi_861
1127500902078664704	@Mayur35166479 सही कहा भाई ठेका पद्धति बंद हो और हमें कुछ स्थाई हल दे	NOT	NONE	hasoc_2020_hi_3923
1123507542959616000	@ArvindKejriwal हमारे पप्पु राजा नें चटवाने से मना कर दिया तो लगता है अब अखिलेशवा का चाटने की सोच रहे हो 😜	HOF	PRFN	hasoc_2020_hi_76
1127469662889889792	RT @sumannager: गौरवी यादव, वेस्ट दिल्ली रेसिडेंट। फर्स्ट टाइम वोटर। मैं अपना वोट #PM face देखकर नहीं, #MP face देखकर कर रही हूँ क्योंकि…	NOT	NONE	hasoc_2020_hi_1309
1127762299467419648	RT @RishiDarshan: आंवला+धनिया+मिश्री का पावडर समभाग लेकर रोज एक एक चम्मच लेकर चबा चबाकर खाकर ऊपर पानी पीने से गर्मी के कारण होनेवाले सीर द…	NOT	NONE	hasoc_2020_hi_791
1127539456116838400	RT @BJP4India: हमने गांव-गांव तक सड़क पहुंचाने का काम किया। दूर-सुदूर को नेशनल हाईवे और रेलवे से जोड़ने का काम किया। हर गरीब परिवार को अप…	NOT	NONE	hasoc_2020_hi_674
1127560276625149953	@Sunnydeolsir गौर से देखिये ऐसा लग रहा है कि मेरा वोट फूल (कमल) पर गया है।जयहिन्द	NOT	NONE	hasoc_2020_hi_4313
1123635108521463808	RT @HariSah71886470: @sardanarohit मसूद अज़हर को UNSC ने अन्तर्राष्ट्रीय आतंकवादी घोषित कर दिया… 400 सीट पाने के लिए और कितनो को आतंकवादी…	NOT	NONE	hasoc_2020_hi_769
1127563833407492096	RT @Republic_Bharat: कांग्रेस की कर्ज माफी स्कीम की खुली पोल, मध्य प्रदेश के गुना में ज्योतिरादित्य सिंधिया के सामने भड़के किसान - देखें VI…	HOF	HATE	hasoc_2020_hi_3899
1127526848018010113	RT @Sunil_rajsharma: हम मेहनत करके निकले हुए लोग हैं, मजदूर आदमी को जितना मान सम्मान मिलता है, उतना हमको भी मिलता है। हम मान सम्मान के लिए…	NOT	NONE	hasoc_2020_hi_2358
1127798269810229248	RT @Chahat_60: कैसे कह दूँ कि मेरी हर दुआ बेअसर हो गयी, मैं जब जब भी रोई मेरे भोलेनाथ को खबर हो गयी 🌹सुप्रभात दोस्तों 🌹 🙏…	NOT	NONE	hasoc_2020_hi_3360
1123566993041346567	@abhijitmajumder बच्चों के कंधे पर बंदूक रखकर चला रहे हैं कांग्रेसी यह दिन आ गए हैं मासूम बच्चों को भड़काया जा रहा है इस हद तक गिर गए ..	NOT	NONE	hasoc_2020_hi_4002
1127472842180788224	RT @pokershash: @sardanarohit @vsurywanshi87 लगता है आज तक ने भी Cover नही किया यह स्टोरी। दूसरो का सपोर्ट लेना पड़ रहा।	NOT	NONE	hasoc_2020_hi_3531
1127508925773803520	@dimplegyuu hai hai 😁	NOT	NONE	hasoc_2020_hi_1684
1127548733883731969	अर्ज किया है "मत फेंको इतना कि बादलों में छेद हो जाए क्या पता .... तुम भेजो यहाँ से प्लेन, वो रेडार में कैद जाए" #EntireCloudCover	NOT	NONE	hasoc_2020_hi_4332
1123568100337569797	@Sukhdev00831680 भाई! ऐसा तथाकथित भ्रष्टाचार कभी होता था! पर अभी पिछले १५-२० सालों में ऐसा कुछ नहीं है! बहुत सुधार है! एक आध जगह कुछ होता भी है तो बहुत चैनल है जहां इसकी शिकायत की जाती है! पर मीडिया में इतने छोटे सी चीज के लाने का मतलब कुछ और होता है भाई! वरना हम जैसे सैनिक इसका खुद समर्थन करते!	NOT	NONE	hasoc_2020_hi_3440
1127588680460161025	RT @Doval_Ajit12: बताओ सड़क पर भारी गर्मी में आने के बाद भी मन का कुछ नहीं मिला , 3 रात नींद नहीं आयी होगी । https://t.co/qEpZmh2sdz	NOT	NONE	hasoc_2020_hi_2204
1123634374526754816	@sir_jenishpatel @msisodia नंगा नहायेगा क्या ओर निचोड़गा खुजलीवाल की गा.... मे निंबु 😆	HOF	PRFN	hasoc_2020_hi_3437
1127502709802840064	RT @TejBahudur: अगर मेरा नामांकन रद न होता तो मोदी को मे कड़ी टक्कर देकर मे जीत दर्ज करता ओर मोदी को हराता देखिये फाईनल पोल 👇 ।@dilipmandal…	NOT	NONE	hasoc_2020_hi_1142
1127513929565872129	RT @Kailash26654053: #FridayFeeling #IndianSlaveMedia देश की मीडिया भ्रष्ट हो चुकी है अगर देश बचाना है तो बिकाऊ मीडिया को हटाओ होगा देश…	HOF	OFFN	hasoc_2020_hi_3295
1123521992341082114	RT @sachinitp: कभी कश्मीरी हिन्दू भी शान्ति के कबुतर उड़ाया करते थे, चचा नेहरू की तरह आज शरणार्थी कैम्पो में दाना चुग रहे हैं और बनो सि…	NOT	NONE	hasoc_2020_hi_1174
1123648047974498305	और आपको अगर निकाल न दिया जाता तो अभी तक कॉमेडी कर रहे होते।	NOT	NONE	hasoc_2020_hi_3933
1127502286190628865	RT @kkvarun5: @VedTiwari @ArvindKejriwal @kunalkamra88 @ArvindKejriwal क्या ये मॉब लिचिंग तो नहीं है ना सर् जी।	NOT	NONE	hasoc_2020_hi_780
1127483692815769600	RT @BJP4India: जब इन लोगों को मौका मिला तो इन लोगों ने बिजली में भी घोटाला कर दिया। जब मुझे सेवा का अवसर मिला तो ढाई करोड़ से ज्यादा गरीब…	NOT	NONE	hasoc_2020_hi_166
1127461785974403074	RT @munshi_jee: दिमाग घसक गया है क्या? इस्लाम से बहुत पहले से तक्षशिला, विक्रमशिला, नालंदा और ल्हासा चल रहा था। https://t.co/oWt8J86PvL	NOT	NONE	hasoc_2020_hi_1855
1123619518293483520	@ANINewsUP भाई केजरीवाल की तरह थू थू होने से बच गयी, चुनाव तो अगली बार लड़ लियो, किसी हल्के फुल्के के खिलाफ ।	NOT	NONE	hasoc_2020_hi_1687
1127692262966796291	RT @kalevidyasagar: एक भिखारी के रोज़ के आने जाने के रास्ते में तकदीर ने हीरे-जवाहरात की पोटली रखी और उसी दिन उसने थोड़े पैसों की लालच में…	NOT	NONE	hasoc_2020_hi_4141
1127646020781797376	RT @KumarKaushalen6: @SushilModi क्या सर अब बितरहित कॉलेज का क्या करना है, या तो इसे बंद कर दीजिये या फिर इसके बारे मे सोचिये, अब दुख बर्दा…	NOT	NONE	hasoc_2020_hi_406
1127606049052082177	@rishibagree इस में भी माँ का प्यार ही होता है	NOT	NONE	hasoc_2020_hi_1016
1127460796110331904	RT @agrwal_akhil: आज दिल्ली वालों सोच समझ कर वोट करना एक बार आप पप्पू बन चुके हो आज नहीं बनना जो आदमी अपने गुरू का नहीं हुआ वो आपका किया हो…	HOF	OFFN	hasoc_2020_hi_2344
1123554137503817728	@BSPSupporterl जिसका जमीर मर गया हो वही इनके साथ रह सकता है।	NOT	NONE	hasoc_2020_hi_3419
1127604757214793729	RT @RavenderSingh16: #MondayMotivation आज शास्त्रों के ज्ञान से हर कोई अनजान है क्योंकि हर कोई किसी ना किसी दिन अवश्य किसी न किसी देवी देव…	NOT	NONE	hasoc_2020_hi_4268
1127499660547878913	@ReallySwara @digvijaya_28 @INCIndia @RahulGandhi दिग्विजय से दूरी बना कर रखे , उनका ट्रैक रिकॉर्ड अच्छा नही है। वैसे वो चुनाव में प्रज्ञा तो जीत ही रही है।	NOT	NONE	hasoc_2020_hi_2427
1127797707781705728	Sant Shri Asaram Bapu Ji कहते है गर्मी के दिनों शरीर मे होनेवाली गर्मी मिटानी हो तो मुल्तानी मिट्टी को शरीर पर रगड़ रगड़ के स्नान करें। #SummerHealthTipsByBapuji https://t.co/8P5yZFllvK	NOT	NONE	hasoc_2020_hi_3044
1127563690780192775	@HQGpFv1WoE0aaYY @MahilaCongress @RahulGandhi @sushmitadevmp @priyankagandhi @INCIndia ये देखो कितने ईमानदार है https://t.co/jpoNKrk23r	NOT	NONE	hasoc_2020_hi_800
1127558229825703936	बहुत दुःख के साथ सूचित कर रही हुँ . . मेरा चार्जर अब इस दुनिया में नहीं रहा😏😒😒 😦😭😭😭😭😱	NOT	NONE	hasoc_2020_hi_2447
1127751037756960768	72000 के वादे पर भी नहीं जीते तो अगले चुनाव में हम सीधा नोट छापने की मशीन देने का वादा करेंगे जिसको जितना छापना हैं छाप लो : श्री राहुल गांधी 😅😂😂 #AayegaTohModiHi	HOF	OFFN	hasoc_2020_hi_2580
1123606335591931904	@ZeeNewsHindi टू ख़ुद नीलम की कांग्रेस ने बोली नहीं लगाया है. और किया बोल रहे हैं तेरा MLA को पैसा दे रहे हैं. ये तेरा कोई खोरीदे नहीं है	NOT	NONE	hasoc_2020_hi_3604
1123600757192675330	RT @_garrywalia: #LokSabhaElections2019 . दिल्ली में आप किसके साथ है ? वोट करके RT करे !! @RahulGandhi @ArvindKejriwal @narendramodi	NOT	NONE	hasoc_2020_hi_2736
1127539212826234880	RT @Praveen71730117: @anuragspparty @yadavakhilesh @ndtv @Mayawati @RahulGandhi अबे ढक्कन मजदूरी कर रहा है।औऱ ये पाप नही कर रहा। टोंटी नही…	HOF	OFFN	hasoc_2020_hi_3645
1127764274997125120	RT @Noor_chaudhari: सनी देओल को धक्के मार कर किया गया गुरुद्वारा साहिब से बाहर कहा bjp के दलाल को अन्दर जाना वर्जित है https://t.co/ovtuWaN…	HOF	OFFN	hasoc_2020_hi_295
1127558603097776129	RT @The_NehaJoshi: जब हर ‘नेता’ सरकार बनाने में व्यस्त है उस वक्त @dpradhanbjp कहां हैं? प्रधान ने दिखाया है कि चुनाव आते-जाते रहेंगे, ले…	NOT	NONE	hasoc_2020_hi_226
1127582837773725696	दिल मेरे तु दिवाना है पागल हे मेने माना है 😘😘😘😂😂	NOT	NONE	hasoc_2020_hi_1688
1127626383071408128	RT @Miss_sakshii: वो जिसका हाथ पकड़ लेते है, चाहे बन्दा कहे मै तेरा नही, वो तब भी नही छोड़ते, ओर जो कहते है मै तेरा हु उसे तो कैसे छोड़ें…	NOT	NONE	hasoc_2020_hi_744
1127599187204485120	डाउनलोड GIFkaro, भारत की सबसे बड़ी GIF लाइब्रेरी (https://t.co/ZqLdHVWRzo) -,और हर दिन पायें ₹ 800 नकदी जीतने का मौका । #GIFkaro https://t.co/ows1PIAO31	NOT	NONE	hasoc_2020_hi_1915
1127626831853527040	#SundayMotivation किसी भी धर्म ग्रंथ में मांस खाने का आदेश नहीं है ना ही अल्लाह हू अकबर ने खाया नहीं किसी को खाने का आदेश दिया जो भी खाएगा वह राक्षस होगा इसलिए मांस का प्रयोग ना कर! देखिए हरियाणा न्यूज़ चैनल पर 6:00 AM से https://t.co/8ksHE48X1U	NOT	NONE	hasoc_2020_hi_2723
1127799251310747648	RT @iamNileshDubey: जब प्रियंका अमेठी में बोल रही थी कि मोदी झूठ बोलता है । उस वक़्त राहुल गांधी कोर्ट में झूठ बोलने पर माफीनामा दे रहा था🖕…	NOT	NONE	hasoc_2020_hi_333
1123642310170894336	@AacharyaSahiiL क्यों कि कुत्तों हड्डी बहुत मिली है 23 मई तक चबाने को। इनके घर के लोग थोड़े ही न मर रहें हैं। ये bossdk के रांड मीडिया अपने रंडापे से ही तो लोकतंत्र को कोठे में तब्दील कर रखा है। खैर इनका टाइम भी आएगा। एवरी थिंग हैज़ एक्सपायरी डेट	HOF	PRFN	hasoc_2020_hi_456
1127634276734734336	चप्पल तो बीजेपी वालो को लगने वाली हैं 23 मई को	HOF	HATE	hasoc_2020_hi_163
1123801844692783111	@ZeeNewsHindi और लगे हाथ @ArvindKejriwal कजरु को ग्लोबल गिरगिट और @RahulGandhi राउल को ग्लोबल झुठा भी धोषीत करदेना चाहीए	HOF	OFFN	hasoc_2020_hi_2703
1127613238101856256	RT @tarsemkpahi: लोकतंत्र की ऐसी की तैसी 😳 EVM मशीनों को अगवा करने की अब जरूरत नही, धन बल के ज़ोर पर EVM का गला शरेआम घोंटा जा रहा है, लग…	HOF	HATE	hasoc_2020_hi_1004
1123631719549030400	RT @Mimansa_Zee: मसूद अज़हर अंतरराष्ट्रीय आतंकी घोषित, मसूद हाफ़िज़ भारत को कब सौंपेगा पाकिस्तान ? 2019 के सबसे बड़े नक्सली हमले का ‘सबसे ब…	NOT	NONE	hasoc_2020_hi_1438
1127811876157558785	दो कोड़ी का टीकट 6 करोड़ में बेच कर केजरीवाल जी सिद्द कर दिया की उनसे बड़ा बनिया कोई नही	HOF	OFFN	hasoc_2020_hi_1816
1127815617464029184	RT @AdityaRajKaul: राहुल, समोसा कैसा था? आपने टेस्ट्स नहीं बताया? जलेबी भी थी, उसका टेस्ट्स कैसा था? https://t.co/SHzirStD4y	NOT	NONE	hasoc_2020_hi_1902
1127565259475181569	RT @NagarJitendra: ये पप्पुलाल चुनाव के अंतिम चरणों मे भी कॉमेडी करने से नही चुकेगा.!! दुनिया अंगुली दिखाती है, ये पुरा हाथ दिखा रहा है.!!…	NOT	NONE	hasoc_2020_hi_3248
1127480551277977600	RT @BJP4India: आपका हर वोट मेरे लिए जरुरी है, पवित्र है और अमूल्य है। जीत सामने देखकर ये समय आराम करने का नहीं है, ये जीत को इतना ऐतिहासिक…	NOT	NONE	hasoc_2020_hi_1651
1127637518944366592	RT @BJP4Gujarat: यहां किसानों का 2 लाख तक का कर्ज माफ होना था। किसानों के घर आज पुलिस आ रही है, बैंक किसानों को कर्ज नहीं दे रहे। मध्य…	NOT	NONE	hasoc_2020_hi_4266
1127508539889422342	@ReallySwara @digvijaya_28 @INCIndia @RahulGandhi स्वर आंटी को तो बहुत मजा आता होगा अगल बगल में सारे मर्द ही पड़े हैं	HOF	OFFN	hasoc_2020_hi_2230
1127548222187102208	RT @Sunil_Deodhar: केन्द्रीय बलों की वर्दी पहनाकर ममता बनर्जी बंगाल पुलिस को बहुरूपियों की तरह चुनावी ड्यूटी पर भेज रही हैं। यह बेहद गंभीर…	NOT	NONE	hasoc_2020_hi_3603
1127782272751550465	RT @AbhijatMishr: ये जो इंदिरा और राजीव गांधी के नाम पर वोट मांग रहे है उनसे कहना चाहता हूं अब वो ज़माना नही जब समधी को दिखा के दूल्हे की…	NOT	NONE	hasoc_2020_hi_796
1127743739672137728	@WasiuddinSiddi1 @sshubh2 दलाल और बेशर्म मीडिया से ऐसी उम्मीद नहीं की जा सकती है	HOF	OFFN	hasoc_2020_hi_624
1127476503791321089	RT @narendramodi_in: जब इन्हें लोगों को मौका मिला तो इन लोगों ने कोयला घोटाला कर दिया। जब मुझे सेवा का अवसर मिला तो मैंने 7 करोड़ गरीब मा…	NOT	NONE	hasoc_2020_hi_2981
1127595752044126209	RT @AlokRajawat19: #Allah_Kabir गंगा काठे घर करे,पिवे निर्मल नीर। मुक्ति नहीं हरि नाम बिन,ये कह रहे साहेब कबीर।। कुम्भस्नान पर पहले नहाने…	NOT	NONE	hasoc_2020_hi_893
1127617910556381184	RT @manijha121: हमेशा लिखना, इस डर से भी चाहता हूँ... कि सुना है साँसे थमते ही.. लोग भूल बड़े जल्दी जाते हैं और किताबें मरती नहीं है!! #म…	NOT	NONE	hasoc_2020_hi_309
1127555105065246725	डील का तो पता नही लेकिन बुद्धि जरूर दोनों की मोटी है। 😂😂	HOF	OFFN	hasoc_2020_hi_3285
1127803181369479168	RT @SherniPunjabi: जापानी ने उडती हुई मक्खी की गर्दन तलवार से काट दी ! भारतीय ने मच्छर उड़ाया, तलवार घुमाई पर मच्छर उड़ता ही रहा, जापानी…	NOT	NONE	hasoc_2020_hi_3693
1127538566920171520	RT @RubikaLiyaquat_: रिप्लाई करें.. @sambitswaraj @RahulGandhi https://t.co/dTMxiPucRe	NOT	NONE	hasoc_2020_hi_1609
1127502315525566464	RT @RoflGandhi_: कल कथित इंटरव्यू में पत्तलकार चरसिया जी प्रधानमंत्री जी से पूछ बैठे कि आप बटुआ रखते हैं क्या साथ में। मतलब अब इनको भी भ…	NOT	NONE	hasoc_2020_hi_205
1123557086095298563	@dilipmandal पासवान जी का आत्मविश्वास भी पहले से कम लग रहा है	NOT	NONE	hasoc_2020_hi_1375
1127570439428091904	RT @BhootSantosh: . इसका स्क्रीन शॉट लेकर रख लिया हूँ.! कल को अगर फिर से पाकिस्तान की ओर से फायरिंग या घुसपैठ की खबर आए,, तो किसे गालियाँ…	NOT	NONE	hasoc_2020_hi_484
1127632791942901761	RT @DrRutvij: हर वर्ग के लोग इस सरकार से त्रस्त हैं और आने वाली 19 मई को जनता गुंडा राज से मुक्ति पाने के लिए पुनः लोकतंत्र की स्थापना हो ए…	HOF	HATE	hasoc_2020_hi_3676
1127806641636806656	RT @sakshijoshii: कौन किसको क्या गाली देता है कौन कैसे घर में रहता है किसके पिता कौन थे या माता कौन है क्या इन सब स्वार्थी बातों से मतदाता…	NOT	NONE	hasoc_2020_hi_2553
1123521686169513985	RT @JantaKaReporter: कासगंज हिंसा में जिंदा शख्स को ‘मृत’ घोषित करने वाले अभिजीत मजूमदार अब प्रियंका गांधी का ‘एडिटेड वीडियो’ फैलाते हुए पक…	NOT	NONE	hasoc_2020_hi_1670
1127744482055720960	@narendramodi Tu Nazar araha hai Kya aasman me	NOT	NONE	hasoc_2020_hi_1750
1127525166118871040	RT @takeyouxhome: Baekhyun is part of the dance line Baekhyun is the main dancer Baekhyun is part of the dance line Baekhyun is the main da…	NOT	NONE	hasoc_2020_hi_2949
1123824816916762626	RT @vikrantkumar: या तो आप भोले है या आप चिरकुट है जो समझ नही पाते. खैर, बोस से लेकर शास्त्री जी और सिंधिया, पायलट जी - स्वर्ग में जहां हों…	NOT	NONE	hasoc_2020_hi_420
1127613938546266113	@thelostgirl_23 @NikonIndia @NikonAsia पिछले सात दिनो से Pool मे #BeatTheHeat कर रही हो। अब तो बाहर आ जाओ।	NOT	NONE	hasoc_2020_hi_810
1123510667716120576	RT @Amit5566456: न कुचलो #फ़ुटपाथ को यहाँ पे रात को #मज़दूर ख़्वाब देखते हैं किसी ने कुचल दिया था....याद है न #प्रधानमंत्री श्रमयोगी…	NOT	NONE	hasoc_2020_hi_592
1127603889019158528	अरे मूर्ख, जब वो गरीब माँ का बेटा 23,000 ड्रेस पहनकर रैलियां कर रहा था तब वो 125करोड़ भारतीयों का प्रधान मंत्री था कोई लुक्खा चिन्दी चोर पार्टी का मुखया नहीं था। दुनियाँ के सबसे बडे लोकतन्त्र हिंदुस्तान का बादशाह था किसी एरे गैरे नाथू खौरे पार्टी का नेता नही	HOF	PRFN	hasoc_2020_hi_3802
1127663624258932736	RT @bittupandit34: क्यो भाई दिल्ली वालों 😎 23 तारीख को केजरीवाल के #टट्टे_रंगीन करने का जुगाड़ किया या नही 😍🤣 https://t.co/N9cYqmiXCP	HOF	PRFN	hasoc_2020_hi_2369
1123564782617972736	RT @Phoolmati13: #वेद_मेरा_भेद_है गीता अध्याय 13 के श्लोक 25 में वर्णन है कि है ,अर्जुन जितने भी स्थावर जंगम जीव है वह क्षेत्र तथा क्षेत्र…	NOT	NONE	hasoc_2020_hi_1919
1123807855147147265	@BJP4India अर्बन नक्सल,भारत नहीं चाहता हैं।	NOT	NONE	hasoc_2020_hi_430
1127613338752507904	RT @indreshmaikhuri: लो जी स्वयम्भू राष्ट्रवादियों का पाकिस्तान और जिन्ना प्रेम जब तब जागता रहता है. आडवाणी से लेकर मध्यप्रदेश के रतलाम संस…	NOT	NONE	hasoc_2020_hi_2601
1123646487664025600	RT @Terewala0: मैंने जिस लड़की को चाहा आज उसी के बच्चे मुझे कहते हैं पापा स्कूल तक छोड़ दो....😝🤣🤸 मेको हर कोई की तरह मामा नहीं बनना😝🤣🤸🏃🏃	NOT	NONE	hasoc_2020_hi_3443
1127794293609918464	RT @terimaut_htl: उसे मोहब्बत थी किसी और से मैं खामखा प्यार करता था. ले गया मेरे सामने से उसे कोई और मैं तो बस उसे बात करने की तैयारी करता…	NOT	NONE	hasoc_2020_hi_1238
1123615307241623552	RT @AjayKum13838284: केजरीवाल:-चुनाव के दौरान अजहर को अंतर्राष्ट्रीय आतंकी घोषित करके मोदी को फायदा पहुँचाया गया है संयुक्त राष्ट्र भारत के…	NOT	NONE	hasoc_2020_hi_1382
1127801449092542464	RT @JBMIS: देश में अदालतें चाहें तो केस 10 दिन में भी खत्म हो सकते हैं (गोगोई केस) और न चाहें तो 70 साल भी नहीं खत्म होने दें (राम मंदिर)	NOT	NONE	hasoc_2020_hi_4009
1123767254259261441	RT @DasiKushwah: गीता जी के अ*-18 के श्लोक-66 मे गीता ज्ञान-दाता अर्जुन से कहता है कि.. हे ! अर्जुन मेरी सम्पूर्ण पूजाओं को त्यागकर तू केव…	NOT	NONE	hasoc_2020_hi_270
1127545256839237633	यही छाया दिखलाकर तू हिन्दुओं को बर्बाद करना चाहता है।	NOT	NONE	hasoc_2020_hi_2912
1127806230620196865	RT @rukasa007: उनकी गिनती लापता लोगों में हो रही थी, क्योंकि तब पुरोहित के बारे में किसी के पास कोई जानकारी नहीं थी ले.कर्नल पुरोहित के अ…	NOT	NONE	hasoc_2020_hi_1995
1127772109944414209	RT @shivin_forever: बातें भूल जाता हुं अकसर तुमसे बात करते करते❤ #shivin @Janhavi91084685 https://t.co/L5iB5nTWQ3	NOT	NONE	hasoc_2020_hi_2223
1123526245373767680	RT @BabitaSolanki1: #TuesdayMotivation कबीर,वेद कतेब झूठे नहीं भाई,झूठे है जो समझे नाहि। #वेद_मेरा_भेद_है कि पूर्ण परमात्मा कबीर जी है।वो ह…	NOT	NONE	hasoc_2020_hi_890
1127566182200987648	RT @AazimSaifi7451: अबे हुतिये बिगबॉस मे तू पहले राउंड मे उन लोगों से हार कर निकला था जिन्हें उनके महौल्ले वाले नहीं जानते थे 😂 @nirahua1…	HOF	PRFN	hasoc_2020_hi_1809
1127786529961590784	RT @Bengalan_kudi01: अर्ज क्या है.... कराने पङते हैं खुली सङको पर गाल लाल यूहीं नहीं बनजाता हूँ मैं अरविंद केजरीवाल @ArvindKejriwal 😹😹😹😹 h…	HOF	OFFN	hasoc_2020_hi_2739
1123787714107727873	RT @BAAP40659240: सरकारो मे बैठे पार्टीयो को ग्लैमर दिखाकर जनता को प्रभावित करना भी चुनाव अंचार संहिता का उल्लंघन ही माने चुनाव आयोग https:…	NOT	NONE	hasoc_2020_hi_1843
1123496730052292608	RT @ajayyad39246988: @Balsanskarsewa बच्चे देश की नीव हैं,इन्हें सनातन संस्कृति का ज्ञान जरूर होना चाहिए और महान भारतीय सनातन संस्कृति का…	NOT	NONE	hasoc_2020_hi_1431
1127650517063229440	@MohdRijvan786 @pankajjha_ प्रजातंत्र की परिभाषा,मूर्खो का साशन,तो देखा बुद्धिजीबी लोग वोट करने जाते ही नही?जितने बिना पढ़े बेकार लोग दारू पैसा लेकर वोट देते है,बहुत कम लोग अबके कुछ सुधार हुआ,अभी भी दिल्ली की हालत देखो कोई दक्षिणी दिल्ली वाले वोट डालने गये ही नही,कौन इस गर्मी में AC chorh जाए लाइन लगाने👍	NOT	NONE	hasoc_2020_hi_3339
1127684314768875520	RT @maliniawasthi: बंगाल में जिस तरह हर फ़ेज़ में चुनावी हिंसा देखने को मिल रही है,यह लोकतंत्र की हत्या है!आश्चर्य है कि बात बात पर असहिष्…	HOF	HATE	hasoc_2020_hi_721
1127624743065047040	RT @FrustIndian: कांग्रेस इतनी घटिया पार्टी है कि उसके नेताओं का खुद मन नही होता वोट देने का। https://t.co/nnfgIrYhuY	HOF	HATE	hasoc_2020_hi_3348
1127566832326434816	RT @TheRightster: @theskindoctor13 "अगर बात छेड़ी तो वो तुम्हें कहीं का नहीं छोड़ेगी |"	NOT	NONE	hasoc_2020_hi_1337
1123828268816322561	फिर हमारे जवान क्या है? सेना और सैनिकों का मजाक बना रहा है ये बेरोजगार इंसान!	NOT	NONE	hasoc_2020_hi_866
1127462415128379392	🤔🤔अरे, मोहतरमा आप शायद ''बांग्‍लादेश के लोगों'' की बात कर रही हो। 😜😜	NOT	NONE	hasoc_2020_hi_4087
1127789092702277632	RT @raajsharma1011: तेरा हुस्न बयां करना नहीं मकसद था मेरा ! ज़िद कागजों ने की थी और कलम चल पड़ी !💞💞💞💞💞 https://t.co/lLLpFYWuWj	NOT	NONE	hasoc_2020_hi_2597
1123508872549785601	@RuchiSi70311408 @rajnathsingh देश की जनता और देश की अदालत यह जान चुकी है कि कौन चोर है और कौन चौकीदार है जो चोरी कर रहा है यह सब जो भी है वह आप ही के पार्टी के लोग हैं	NOT	NONE	hasoc_2020_hi_2475
1127808545884217346	RT @Hemants9781: पराग्वे के झंडे को तिरंगा समझ बैठे वाड्रा, फजीहत हुई तो ट्वीट हटाया https://t.co/athhfonjIW via Dailyhunt डाउनलोड करें: h…	HOF	OFFN	hasoc_2020_hi_2466
1123625126073851904	RT @myogiadityanath: भारत की आतंक के खिलाफ वैश्विक मुहिम में कूटनीतिक सफलता, #UNSC ने आखिरकार जैश के मुखिया और पुलवामा के दोषी मसूद अजहर को…	NOT	NONE	hasoc_2020_hi_757
1127503305398280192	मर्दों का दर्द किसी ने तों समझा https://t.co/8WLzr32hOQ	NOT	NONE	hasoc_2020_hi_755
1127500436510998529	सोनिया गांधी ने मनमोहन सिंह से कहा कुछ तो बोलो सरदार☺️☺️ मनमोहन सिंह ने कहा-बहुत हो गया गोरी तेरा प्यार अबकी बार मोदी सरकार☺️☺️☺️	NOT	NONE	hasoc_2020_hi_1304
1127466248738983936	@ZeeNewsHindi लाल किला, पत्थर लाल, शौर्य का रंग लाल , हमारी पसंद कमल निशाण, मुस्लिम बहणोंका ना सहेंगे हलाल। बंद करेंगे - बंद करेंगे ट्रिपल तलाक - बंद करेंगे हलाल - जय हिन्द ! िजतेगी भाजपा , जनमानस का होगा राज, भारत मॉं को सबल बनाने - करेंंगे हम दिनरात काज ।	NOT	NONE	hasoc_2020_hi_3638
1127555100858183682	@news24tvchannel @BJP4India @narendramodi @INCIndia @RahulGandhi कांग्रेसी राजीव शुक्ला के पालतू कुत्ते आ गए फर्जी न्यूज़ लेकर।	HOF	OFFN	hasoc_2020_hi_4289
1127530195064254464	RT @nsui: हर देश की लोकतंत्र की स्थिति को मापा जाता है और मोदी सरकार के शासन में डेमोक्रेसी इंडेक्स में भारत 14 स्थान नीचे आया, 2014 में भा…	NOT	NONE	hasoc_2020_hi_264
1123585527683268608	RT @SumanSh58123278: पैट्रोल इतना महंगा था कि,,,🤔 स्कूटी बेचकर, कुत्ता गाड़ी ले ली .. . ओर कुत्तो की जगह दस इतालवी लूटेरी और उसकी औलादो के…	HOF	HATE	hasoc_2020_hi_1751
1127756750390562816	RT @Pinkimishr: अलवर गैंगरेप: मोदीजी की मायावती को चुनौती, 'सच्चे दलित हितैषी हैं तो, गहलोत सरकार से समर्थन वापस लें' दलित नहीं दौलत हितै…	NOT	NONE	hasoc_2020_hi_339
1127534515205754880	RT @MukulRanjanRai: #नोटा भी वोट ही हैं माननीय। ऐसा कहना की आपको #नोटा का अर्थ पता होता तो आप ऐसा ना कहती, ये आपका अपमान होगा। पर समझने वा…	NOT	NONE	hasoc_2020_hi_2227
1123511808579342337	RT @Nattashasharrma: सुनिए इन मासूम बच्चों ने अमेठी में लगाए ज़बरदस्त नारे, देश का बच्चा बच्चा जनता है मोदी की सचाई। #PriyankaGandhiInAmet…	NOT	NONE	hasoc_2020_hi_1222
1123504531449376773	RT @Nationalist_RSS: @RubikaLiyaquat बहन आपको क्या लगता है, ये बच्चे अपने आप नारेबाजी कर रहे है। अनजान ना बनो मैडम,, बच्चो से बुलवाया गया…	NOT	NONE	hasoc_2020_hi_3418
1127515355612532736	@RahulGandhi Ravish kumar to madharchad hai	HOF	PRFN	hasoc_2020_hi_1642
1123812863129391105	RT @Puja_Kumari1: #वेद_मेरा_भेद_है #love बाइबिल में लिखा है कि जीसस के शरीर छोड़ने के बाद एक मसीहा करेगी जो विश्व में शांति स्थापित करेगा।…	NOT	NONE	hasoc_2020_hi_2608
1127542580869091328	@HnHitesh आन्टानियो कैबरेडांसर थी तो थी	NOT	NONE	hasoc_2020_hi_3998
1127773309540560896	RT @AsaramBapuJi: चैन की नींद के लिए चैन की नींद न आती हो, तो सिरहाने की तरफ कपूर जलाकर "ॐ" का गुंजन करें l सुबह -शाम जलाने से वायु दोष दू…	NOT	NONE	hasoc_2020_hi_1112
1123756978231238662	RT @dhirajkpandey56: जात पात से ऊपर ऊठ के कमल का बटन दबाना है हर हर मोदी - घर घर मोदी नारा यही लगाना है हाथ में लेके कमल फुल अऊर जय भारत…	NOT	NONE	hasoc_2020_hi_4025
1127512339945639936	RT @sanjay_dimpy: कांग्रेस अब बहुत पीछे जा चुकी है बेहतर है भाजपा को हराने के लिए आप को वोट करें।	HOF	HATE	hasoc_2020_hi_2594
1127602748151582722	RT @shankerjoshi001: @AsaramBapuJi हर पल मे खुशी देती है मां अपनी ज़िंदगी से जीवन देती है मां, भगवान🌞क्या है !! मां की…	NOT	NONE	hasoc_2020_hi_587
1127754774911152128	@DeoDarshanSing4 ईस्वर ने यह सृष्टि रची है,जो उन पर सवाल खड़े करते है,वह उन्हें अपनी उपस्थिति देते है, मैं जब समाचारों में पढ़ता या देखता,कि पत्नी ने पति की हत्या करा दी,साडू का साली से चक्कर, भाई ने भाई की हत्या किराई,दोस्त ने दोस्त,पड़ोसी ने पड़ोसी सब अब मेरे साथ कोशिश ॐ	NOT	NONE	hasoc_2020_hi_2479
1123557144811282432	@shuklapinku @renu_18 @priyankagandhi उसका तरीका बहुत जबरदस्त था, पहले बच्चों से वो नारे लगवा दिए फिर उनको रोक दिया ऐसा नारा मत लगाओ फिर चमचे पूरा वीडियो दिखा कर बता रहे हैं कि प्रियंका दीदी कितनी अच्छी और समझदार हैं । क्या बड़े वाले नौटंकी बाज हैं ये सब	NOT	NONE	hasoc_2020_hi_267
1123604670453207041	RT @champ4561: मोदी सरकार की बड़ी कामयाबी "मसूद अज़हर" अंतरराष्ट्रीय आतंकवादी घोषित 💪 मोदी सरकार और देश को बहुत बहुत बधाई 🙏🙏 भारत माता की…	NOT	NONE	hasoc_2020_hi_2842
1123557316765184000	RT @narendramodi_in: अभी हाल में श्रीलंका में जो बम धमाके हुए थे उसके बाद वहां की सरकार ने जाकिर नाइक के टीवी चैनल पर बैन लगाने का फैसला कि…	NOT	NONE	hasoc_2020_hi_880
1127646830303428613	@jiteshrochlani पप्पू भैया बोल रहे है मोदी जी ने अम्बानी के लिए मैच फिक्स करवाया हैं । 🤣🤣😅😅🤣🤣	HOF	OFFN	hasoc_2020_hi_1692
1123545174259503106	@Kavita_Sharma4 औकात नहीं है तुम्हारे बाप का भी	HOF	OFFN	hasoc_2020_hi_3650
1127528492206313472	इसका जाँच होना चाहिए। 👁🇮🇳🙋	NOT	NONE	hasoc_2020_hi_1883
1127610880915648512	@sakshijoshii मतलब जनता सरकार में बदलाव नहीं चाहतीं है ।	NOT	NONE	hasoc_2020_hi_2191
1123648165414965248	RT @rukasa007: नेहरू के ज़माने से ही यह लोग इसे चिपके हुए हैं और ऐसा बिना सरकारी संरक्षण सम्भव हो नहीं सकता समझे आप दूसरा कि यह लोग एक दुस…	NOT	NONE	hasoc_2020_hi_3928
1127666958739099652	@lmbisaat Bro sem situation bahut mushkil horahi hai	NOT	NONE	hasoc_2020_hi_329
1127809594439360513	RT @ExSecular: सिद्धु - मोदी जी वो दुल्हन की तरह है जो रोटियाँ कम बेलती है और चूड़ियाँ ज़्यादा खनकाती है भक्त- @sherryontopp वो हिजड़ा…	NOT	NONE	hasoc_2020_hi_3958
1123693921052385284	RT @AamAadmiParty: चाँदनी चौक में उमड़े इस अपार जनसमूह से एक बात आज साफ हो गयी है कि दिल्ली के दिल में सिर्फ और सिर्फ अरविंद केजरीवाल ही है…	NOT	NONE	hasoc_2020_hi_3464
1123783117121171462	RT @SudarshanNewsTV: हिन्दू प्रेमिका व मुस्लिम प्रेमी एक साथ लेते रेल की पटरी पर.. ट्रेन पास आई तो निकल कर भाग गया प्रेमी और टुकड़ों में कट…	NOT	NONE	hasoc_2020_hi_931
1127576051398336512	RT @DrRutvij: चाहे कितनी बाधाएँ लगाने की कोशिश कर लो ममता दीदी... बंगाल में राम राज्य आने वाला है.. यह तो तय हैं!! https://t.co/bGopfIpMqX	NOT	NONE	hasoc_2020_hi_2893
1123528250234245120	RT @NishiSi33227970: ट्वीट पे ट्वीट डालने का मतलब ये नहीं कि मै बेकार बैठी हुँ बस जुनून है " कांग्रेस के चोरो को जलील करने का " 😎😎😎😂…	HOF	HATE	hasoc_2020_hi_2886
1123483668989845505	अक्सर देखा गया है आतंकवादी से लेकर कई गुनहित प्रवृत्ति के लोग बुर्के की आड़ में गलत काम करते पकडे जाते हैं, अगर बुर्के की आड़ में देशविरोधी काम या फर्जी वादा हो रहा हो तो उसे फ़ौरन प्रतिबंधित करना ही देश हित में है जिन्हे ये मांग सही लगता है वो अधिक से अधिक रीट्वीट करें 🙏	HOF	HATE	hasoc_2020_hi_715
1127621089847156736	@ShilpiSinghINC लेकिन उस मशीन से भी कोठे वालियों का पाप नही धुलता।	HOF	OFFN	hasoc_2020_hi_1536
1127748386952585216	RT @VeerHercules: अब नोटा नही सिर्फ मर्द चुनो एकतरफ़ा काले कानूनों का अंत तुरन्त ? Vote for #mard #MeraAdhikarRashtriyaDal #meraadhikarr…	NOT	NONE	hasoc_2020_hi_3344
1127543881107509248	RT @Diva_Rizvi: यह तस्वीर मे दिए गए बेचारे दोनों अंधभक्ति में @TajinderBagga से मुकाबला करना चाह रहे हैं अरे गंवारों तुम अंधभक्ति दिखाते…	HOF	OFFN	hasoc_2020_hi_194
1127637992904871936	@sambitswaraj क्यों नीम पागल की बात का बुरा मानते हैं साहब वो तो पप्पूकोला पीकर पगला गया है और जो अपनी क़ौम के क़ातिलों के चरणों मे पड़ा है उसकी क्या औक़ात ,चौबारे की ईंट की भी ज़्यादा इज़्ज़त होगी	HOF	OFFN	hasoc_2020_hi_2279
1.12356e+18	ये कहीं से खड़े हो जाये हार जाएंगे।	NOT	NONE	hasoc_2020_hi_4105
1123513352066453504	@tanisharma77 @kundanpathakk अलका लांबा को तो अपने पति का नाम भी ना पता	HOF	OFFN	hasoc_2020_hi_3177
1123602166457847808	RT @NituTiw81600052: पता नही लोग 500 का असली - नकली नोट कैसे पहचान लेते है मै तो ट्विंकल खन्ना ओर रवीना टंडन मे भी कंफ्यूज हो जाती हूँ 😂	NOT	NONE	hasoc_2020_hi_4177
1127480576468897792	@DrKumarVishwas छोड़िए इन बेकार के लोगों के बातो को	NOT	NONE	hasoc_2020_hi_2328
1127605587712200704	RT @pooraan_: नाली से गैस बनाने के बाद अब मोदी जी का नया एंटायर क्लाउड महाज्ञान : बादल व बारिश के कारण हम रेडार से बच सकते हैं - मोदी —अब…	HOF	OFFN	hasoc_2020_hi_2089
1123585372460654592	@LambaAlka बूढ़े मां बाप और बीवी को घर छोड़ कर सिर्फ देश की सेवा के लिए सरहद पर गए सैनिक को आप क्या बोलेंगी।	NOT	NONE	hasoc_2020_hi_1668
1127777076025552896	RT @sumanverma7777: #SayNoToStubbleBurning St Ram Rahim Ji इंसा किसानों को खेतों में बचे चारे को न जलाने के लिए प्रेरित करते हैं कयूकि इससे…	NOT	NONE	hasoc_2020_hi_1280
1123639709677133824	RT @iMac_too: ये आदमी है या पायजामा? https://t.co/WmrHMQyxbW	NOT	NONE	hasoc_2020_hi_2847
1127650793904050176	RT @RajeevTiwariIND: 😂😂😂 दिल्ली का कचरा .....बाहर फेंकने का योग आ गया .... https://t.co/Zf61dQfA88	HOF	OFFN	hasoc_2020_hi_3160
1123580561623093248	@JaipalR47901672 @Aaliya11_ @Akhileshthakurs @avntika39b तेरी बहन की चुदाई करने भी लगता है मोदी ही आएगा 💪	HOF	PRFN	hasoc_2020_hi_3255
1123605605787156481	RT @VasundharaBJP: देश की आजादी के बाद करीब 55 वर्षों तक सत्ता में रही कांग्रेस ने झूठे सपने दिखाकर जनता को भ्रमित किया है और मनगढ़ंत कहानि…	NOT	NONE	hasoc_2020_hi_4265
1123761952679956481	@RahulGandhi मसूद अजहर के लिए भी कुछ बोल दो बड़ा दुख हुआ होगा तुम सब को 😂	NOT	NONE	hasoc_2020_hi_4157
1127580929361313792	@ShilpiSinghINC सबका रविश कुमार 1. 1984 2. रोज़गार 3. भ्रष्टाचार 4. जनता की सुरक्षा उनकी गोदी मीडिया 1. क्या आप आम खाते थे? 2. आप बचपन में क्या करते थे?? 3. कौनसा टॉनिक लेते है आप थकते नही? 4. आप 3 घंटे में अपनी नीद पूरी कर लेते है? बस यही फ़र्क है दल्ले और सच्चे पत्रकार में फ़र्क।	HOF	PRFN	hasoc_2020_hi_2051
1127465523086684161	RT @Shivani_Bhabhi: मुझे अब ऐसे चोदो कि मुझे सेक्स की कमी ना हो और अगर मुझे तुम्हारा सेक्स स्टाइल पसंद आया तो आगे भी मैं तुमसे चुदवाऊंगी और…	HOF	PRFN	hasoc_2020_hi_1288
1127566807148236801	भारत अगर धर्मनिरपेक्ष देश है तो इसके पीछे पंडित नेहरू और कांग्रेस की उदारवादी सोच है, जो सदा से सामाजिक सुधारों की समर्थक रही है https://t.co/liQF22HYEp	NOT	NONE	hasoc_2020_hi_4248
1127487354468356096	@SheilaDikshit इसको कांग्रेस से ही राज्य सभा का टिकट दिलवा दो। 😂😂	HOF	OFFN	hasoc_2020_hi_2032
1127633244935950336	RT @Dagar9965Bjp: दादी जैसी नाक है तेरी, मलिंगा जैसे बाल । पीहर तेरा चोर प्रियंका, डाकू है ससुराल ।। एक तू ही है धनवान गौरी, बाकि सब कंगाल।…	HOF	OFFN	hasoc_2020_hi_1735
1127462364813582337	RT @NagarJitendra: लोग समझदार है, कहने की जरुरत नही है। इन्होने #जिंद मे भी लोकतंत्र मजबुत किया है। बस पप्पु का ध्यान रखना, दुनिया मोदी मो…	NOT	NONE	hasoc_2020_hi_3451
1127460859045765120	RT @kala_chaturvedi: हाल ही में भरतीय स्कॉर्पिन सीरीज की चौथी पनडुब्बी "INS वेला" लॉन्च हुवा तब एक पंडित जी द्वारा विधि विधान से हिन्दू सं…	NOT	NONE	hasoc_2020_hi_3799
1127592086214139905	वोट देने से पहले एक बार इस पर जरूर विचार जरूर कीजियेगा .ॐ #MeraVoteModiKo #ModiHaiTohMumkinHai https://t.co/NAF2NyI6pS	NOT	NONE	hasoc_2020_hi_885
1127641910363844608	RT @sachya2002: बस इनके भगवान का नाम पता चल जाये बाकी मैं सारे मंत्र सीख लूँगा 😍 #MIvCSK https://t.co/54mFp06kcL	NOT	NONE	hasoc_2020_hi_3120
1127810781427290112	RT @Abhaysi57454385: @PathakMuneesh शिक्षामित्रों को वेतन बीजेपी अपने पार्टी फंड से देती है क्या चुनाव संकल्प पत्र में शामिल करके झूठ का वा…	NOT	NONE	hasoc_2020_hi_3112
1127733262309179392	RT @Gulzaari_: हर हर महादेव 🙏 https://t.co/6aE9OScn0l	NOT	NONE	hasoc_2020_hi_1157
1123628116637708289	RT @ameytirodkar: कुछ दिन पहले यही मसूद अझर मर गया था। तब भी वो मोदीजी का मास्टरस्ट्रोक था।	NOT	NONE	hasoc_2020_hi_518
1123539344168329216	@sardesairajdeep @priyankagandhi @IndiaToday @aajtak पित्रोदा जी तो पोल खोल गए😉	NOT	NONE	hasoc_2020_hi_1296
1123648853251518464	RT @savita_aap: जिस पार्टी और उसके नेता ज़मीनी हकीकत से जुड़े हो और असल मुद्दे उठाते हो ऐसे नेता ही अब देश की उम्मीद है। उत्तर पूर्वी लोकस…	NOT	NONE	hasoc_2020_hi_782
1127508514702798849	RT @AnkitLal: अब तो बस यही बचा है कि मोदी जी बोले कि उन्होंने हर जहाज पर खुद जाकर काला टीका लगाया था ताकि दुश्मन की बुरी नज़र से बच सके। ज…	NOT	NONE	hasoc_2020_hi_416
1127644808619511808	RT @SoniyaGupta69: तुम्हारे लंड को याद करके तड़प जाती हूँ.. और जब तुम नहीं मिलते हो तो उस रोज फिंगरिंग करती हूँ। https://t.co/C3TYFWx…	HOF	PRFN	hasoc_2020_hi_1851
1123816440858062854	@GdBakshiJe मोदी जी की सबसे बड़ी कूटनीतिक जीत लालू मालू पप्पू सभी की बोलती बंद कर दी	NOT	NONE	hasoc_2020_hi_2527
1123539658770567169	RT @Dr_Uditraj: डॉ अम्बेडकर ने आरक्षण के लिए संघर्ष किया ताकि दलित MLA/MP या कुछ हों तो अपने समाज के लिए भी करें ना की अपना पेट पालें।मैं…	NOT	NONE	hasoc_2020_hi_3189
1123779904296968192	अरे भौजी गया काम से फौजी अरे भौजी चिंता कहे कर रही हो हम है न	NOT	NONE	hasoc_2020_hi_3413
1123639428684046336	@mishrasumit49 लगे रहें फिर ।।	NOT	NONE	hasoc_2020_hi_1633
1127610218198622208	@SourabhBhatt15 @jasbir48232715 अभी किला इंटेक्ट है।	NOT	NONE	hasoc_2020_hi_1710
1127784739010752512	https://t.co/an6YpFdbVW दाईम पड़ा हुआ तिरे दर पर नहीं हूँ मैं खाक़ ऐसी जिन्दगी पे के पत्थर नहीं हुँ मैं क्यों गर्दिशें मदाम से घबरा ना जाए दिल इन्सान हूँ हाय इन्सान हूँ पियाला-ओ-सागर नहीं हूँ मैं रखते हो तुम... https://t.co/an6YpFdbVW	NOT	NONE	hasoc_2020_hi_140
1127535765133463552	RT @IYC: 23 मई भाजपा गई I #MeraVoteCongressKo @RahulGandhi @priyankagandhi https://t.co/etPB4X41lp	NOT	NONE	hasoc_2020_hi_64
1123624236885598208	RT @WasiuddinSiddi1: प्रियंका गाँधी जिस बेबाकी और मज़बूती से राजदीप सरदेशायी के हर सवाल का जवाब दे रही है दावा कर रही है कांग्रेस ही बीजेपी…	NOT	NONE	hasoc_2020_hi_1836
1127477862745796610	RT @AmitCho37470031: @ansarraza16 जिस दिन मुस्लिम समाज नेताओ के फर्जी सेक्यूलर ढोंग को समझ जाएगा,उस दिन मुस्लिमो को टिकट भी खूब मिलेंगे, और…	HOF	OFFN	hasoc_2020_hi_2138
1127634427729760256	@ZeeNewsHindi ये लोगों का यह नौटंकी है, सिर्फ बीजेपी को जलील करने की.	HOF	HATE	hasoc_2020_hi_3794
1127540232050466817	भगवान परशुराम जन्म महोत्सव में पूजा अर्चना कर मांगी खुशहाली की कामना https://t.co/2KflSTQFG3	NOT	NONE	hasoc_2020_hi_3741
1127470187156889601	RT @ZeeNewsHindi: #LokSabhaElections2019: विराट कोहली ने सुबह-सुबह ही लाइन में लग कर किया मतदान #VotingRound6 पर ट्वीट कर दें अपनी राय #A…	NOT	NONE	hasoc_2020_hi_1079
1123825722886369281	RT @shuklapinku: ब्रेकिंग न्यूज़... राहुल के मामा मसूद अजहर जी को अंतरराष्ट्रीय आंतकवादी घोसित कर दिया है 56 इंच अब की बार 700 800 पार 😎…	HOF	OFFN	hasoc_2020_hi_2371
1123803828623761409	RT @ArvindKejriwal: इस जवान का ये विडीओ ज़रूर देखें। मोदी जी इस जवान से इतना क्यों डरते हैं? https://t.co/vS2y8PLqhq	NOT	NONE	hasoc_2020_hi_354
1123771905759223808	RT @LambaAlka: 1999 में BJP की सरकार ही आतंकी मसूद अजहर को रिहा कर,बाइज्जत कंदहार तक छोड कर आई थी, आज 2019 में डिप्लोमेटिक जीत को PMमोदी चु…	NOT	NONE	hasoc_2020_hi_2684
1127467976779751424	पूरी हरामखोर टीम!	HOF	HATE	hasoc_2020_hi_4084
1127483478935662594	RT @im_jaiswalwani: वो माँ जो कभी घर से बाहर भी नहीं जाती, जो किसी से फालतू मतलब नहीं रखती,, जो डरी सहमी सी रहती हो वो माँ भी अपने बच्चे के…	NOT	NONE	hasoc_2020_hi_3539
1127788828431867904	RT @awiresham: रामायण में भी कुंभकर्ण के बाद, मेघनाद मैदान में उतरा था! एक सर्जिकल स्ट्राइक से इस सोने (आतंक) की लंका का दहन नहीं होने वाला…	NOT	NONE	hasoc_2020_hi_46
1123640049436725248	@Viveksunaiya @BBCHindi Hmm देखा मेने तुम्हारे कहने के बाद सब चेक किया था लेकिन उसकी सच्चाई सबको पता है कैसा इंसान था वो भाई कसम से बोल रहा हुँ मुझे उसके यादव होने से दिक्कत नहीं है लेकिन वो इंसान फौजी कहलाने के लाइक नहीं है उसने अपना बेटा खो दिया अपनी गलत हरकतों की बजह से दारू बाज वो एक ना का था	HOF	OFFN	hasoc_2020_hi_3151
1127547026810580992	@sona_rupa Chut me Baal bhut mast hy	HOF	PRFN	hasoc_2020_hi_3059
1123679748524257280	RT @upadhyay_richa: मसूद अजहर को ग्लोबल आतंकी घोषित करने पर अब कांग्रेसी और वामियों ने चीन को संघी घोषित किया। https://t.co/7jny5TNvik	NOT	NONE	hasoc_2020_hi_223
1127715964982718464	RT @BasicShiksha: सीबीएसई: डिजिलॉकर से डाउनलोड करें 10वीं व 12वीं की मार्कशीट, यह होगा डाउनलोड का तरीका #savecutoff90_97 https://t.co/E4V8F…	NOT	NONE	hasoc_2020_hi_1138
1123782584440324097	RT @Virendra203: #वेद_मेरा_भेद_है #jesus इस पूरी पृथ्वी ही नहीं बल्कि 21 ब्रह्मांड में संत रामपालजी के अलावा खुदा कहो राम कहो अल्लाह कहो…	NOT	NONE	hasoc_2020_hi_1878
1127658352018743296	@BBCHindi Ha ha Rohit, Pandya, Bumrah etc ye chutiya hai. Bhosadi wallo ab to sudhar jao.	HOF	PRFN	hasoc_2020_hi_3702
1123546998773207040	RT @shuklapinku: श्रीलंका में पहले बुरका बैन, फिर नकाब बैन उसके बाद अब विदेशी मौलानाओं को देश छोड़ने के लिए कहते हुए धमकी दी है कि निकल जाओ…	HOF	HATE	hasoc_2020_hi_1665
1123556469536722945	@bpmishra109 @Dev_Fadnavis कड़ा स्ट्राइक सुप्रीम कोर्ट नहीं करने दे रही है । लाख सबूतों के बावजूद भी उन्हें हाउस अरेस्ट में ऐश करवा रहे है।	NOT	NONE	hasoc_2020_hi_458
[truncated: 964 more rows]
