# Supplementary material
Source: ML conference proceedings conference paper supplement (https://aclanthology.org/2024.emnlp-main.886)
Supplement: software [file P1_3.xlsx]

## Sheet: Sheet1
text	label	cgpt
The following statement was labeled hateful by 50% annotators: sure nigger loving whore sure . Is the given statement hateful?	0	yes.
The following statement was labeled hateful by 50% annotators: i really do not get white australians hatred of immigrants you are all literally immigrants wtf is wrong with you all i mean i get you hate poc but come on . Is the given statement hateful?	1	yes.
The following statement was labeled hateful by 50% annotators: is refusing 3 rd world immigrants all it takes to get out of the eu sounds much easier than some long protracted referendum western europe is a write off it is all over but civil war between islamic cults trying to control what is left . Is the given statement hateful?	0	yes
The following statement was labeled hateful by 50% annotators: if they gave those chickens to africa we would not need to bring all those refugees here . Is the given statement hateful?	0	yes
The following statement was labeled hateful by 50% annotators: deflect all you want kike spawn the whole world saw what happened and people opinions are shifting use all the mental gymnastics you like to justify things for your masters the rest of us have no such strings and can see things with a clear conscious . Is the given statement hateful?	0	yes
The following statement was labeled hateful by 50% annotators: i am surprised blacks managed to get off their lazy nigger asses to vote . Is the given statement hateful?	0	yes
The following statement was labeled hateful by 50% annotators: i do not know what is worse grouping ambiguity and otherness into the sexualized charged term queer or grouping different individuals into off ish labels and uniting them under a colonial ideas of sexism and gender lgbtqaa hahahah a plus submarginalized reduced to a plus . Is the given statement hateful?	1	yes
The following statement was labeled hateful by 50% annotators: <user> you killed it man great job verbally shoving that kike in the oven you are a fucking hero . Is the given statement hateful?	0	yes.
The following statement was labeled hateful by 50% annotators: fbi is all niggers or spiritual mental niggers they get the info that their master demand and fill out the required paperwork like perfect house niggers . Is the given statement hateful?	0	yes.
The following statement was labeled hateful by 50% annotators: shop trendzset for u latest styling shoes and purses . Is the given statement hateful?	1	no.
The following statement was labeled hateful by 50% annotators: <user> <user> you can be a thot and still not have hoes . Is the given statement hateful?	1	yes.
The following statement was labeled hateful by 50% annotators: i am white do not bathe in guilt tears does that make me a white supremacist neo nazi domestic terrorist . Is the given statement hateful?	1	yes
The following statement was labeled hateful by 50% annotators: really i think it is retarded skinhead neo nazi britain furst types they are way too thick to create a bomb without blowing themselves up . Is the given statement hateful?	0	yes
The following statement was labeled hateful by 50% annotators: ♫ imagine all tha people living sep rat lee whoa ho ho ho ♪ ♪ ♫ john lennon as white nationalist have been a sight to see . Is the given statement hateful?	1	yes
The following statement was labeled hateful by 50% annotators: i am practising not doing the dread white person smile grimace when i silently interact with strangers . Is the given statement hateful?	1	no.
The following statement was labeled hateful by 50% annotators: <number> <number> being anti sjw far left feminazi is not the same as being a anti lbbt or sexist ellie being lgbt bothers insecure homophobes sexists or platform shill slaves downplaying the game hint look at the ppl who called kait a badass in gears5 but have a problem with ellie . Is the given statement hateful?	1	yes.
The following statement was labeled hateful by 50% annotators: been through some bad shit i should be a sad bitch who woulda thought it turn me to a savage . Is the given statement hateful?	1	no.
The following statement was labeled hateful by 50% annotators: lmao he wasted 2 5 0 k on travel for a cheap political stunt but funny you all bitch about 1 a to protect urself from the military govt and police you all fradidently say u love hypocrites . Is the given statement hateful?	1	yes
The following statement was labeled hateful by 50% annotators: do not worry as long as there are two people in the world there will be war just look at how christians want to shed black and muslim blood just to keep america bleached . Is the given statement hateful?	0	yes.
The following statement was labeled hateful by 50% annotators: <user> <user> the estimated u.s. illegal alien population of <number> million the combined populations of <number> states . Is the given statement hateful?	1	no
The following statement was labeled hateful by 50% annotators: <user> dusty retarded gr88 . Is the given statement hateful?	1	yes
The following statement was labeled hateful by 50% annotators: sup niggar i spent <number> years in an all black school i walked the gauntlets my first crush wasn t white . Is the given statement hateful?	1	yes.
The following statement was labeled hateful by 50% annotators: sharia is happening one way or another you dune coons are not as fun about it tho . Is the given statement hateful?	0	yes.
The following statement was labeled hateful by 50% annotators: <user> congrats on making the kike hate list whoohoo be careful out there brother . Is the given statement hateful?	0	yes.
The following statement was labeled hateful by 50% annotators: president putin harassment <user> . Is the given statement hateful?	1	yes.
The following statement was labeled hateful by 50% annotators: cold sweatin stash in her throat this nigger purple sprite . Is the given statement hateful?	0	yes
The following statement was labeled hateful by 50% annotators: i have to see niggers at work in cars at stores just about every fucking where but one fucking place i refuse to see them is in my home that includes the tv muh sportsball . Is the given statement hateful?	0	yes.
The following statement was labeled hateful by 50% annotators: ran it up with the same niggas . Is the given statement hateful?	1	yes.
The following statement was labeled hateful by 50% annotators: i just want louisiana twitter to know that you niggers are the sole reason disney do not wanna buy twitter it all right here on tl . Is the given statement hateful?	0	yes
The following statement was labeled hateful by 50% annotators: <user> <user> nope but why post something homophobes will love self hating gays are very unhappy people . Is the given statement hateful?	1	yes
The following statement was labeled hateful by 50% annotators: <user> how about you get the overwhelming amount of heterosexuality off my gay ass tv first and then we can tackle the significantly fewer pieces of queer rep that you clearly take such issue with obviously to protect your daughter whose sexuality you have no control over anyways . Is the given statement hateful?	1	yes.
The following statement was labeled hateful by 50% annotators: nigger lovers end up knocked up or beat up . Is the given statement hateful?	0	yes.
The following statement was labeled hateful by 50% annotators: f*ck <censored> white gays and f*ck <censored> their smelly loose cyst infested assholes they are the epitome of hypocrisy the pinnacle of being a musty thieves that perpetuate stereotypes on the queer community of color but love to adopt mannerisms when it in their convenience . Is the given statement hateful?	0	yes.
The following statement was labeled hateful by 50% annotators: <user> speaking as part of the maybe some others i am older and white but also a cis gay man not lesbian i loved the indigo girls since the <number> more recently saw them along w mary chapin carpenter and joan baez in charlottesville four voices <number> years ago . Is the given statement hateful?	1	no
The following statement was labeled hateful by 50% annotators: a nigger being randomly violent that totally without precedent . Is the given statement hateful?	0	yes
The following statement was labeled hateful by 50% annotators: poor southerners are white black brown straight queer trans men women nonbinary christian jewish muslim pagan atheist and more the south not only has the largest black population in the us it has more black people than the rest of the country combined . Is the given statement hateful?	1	no.
The following statement was labeled hateful by 50% annotators: easily blacked out off the sailor jerry lol do not remember going to sleep or buying pizza 🖖 🤓 🤘 . Is the given statement hateful?	1	no.
The following statement was labeled hateful by 50% annotators: weinstein amazon vox gq the left is eating itself right now the deathmatch du jour is lecherous kikes versus cat ladies we need to meme a race war between nigs and beaners for <number> . Is the given statement hateful?	0	yes.
The following statement was labeled hateful by 50% annotators: antisemites fall into either of two categories they are either stupid or muslim mohammad was a pedophile that married a prepubescent girl are you also a filthy muslim or are you just stupid . Is the given statement hateful?	0	yes.
The following statement was labeled hateful by 50% annotators: <user> refugees you say emm sounds like illegal aliens go back home and get in line everyone is not a refugee ffs . Is the given statement hateful?	1	yes.
The following statement was labeled hateful by 50% annotators: cut to cubs postgame crew on nbc sports chicago and it a jew a spic and a kneegrow for a team that ll get the vast majority of its offense and pitching this year as usual from white players and whose fanbase is overwhelmingly white . Is the given statement hateful?	0	yes.
The following statement was labeled hateful by 50% annotators: i am surrounded by like <number> asians . Is the given statement hateful?	1	yes.
The following statement was labeled hateful by 50% annotators: <user> <user> <user> no condoms can fail as well as the pill and sometimes people get raped abortions should be legal . Is the given statement hateful?	1	yes
The following statement was labeled hateful by 50% annotators: <user> and hey this goes without saying but a lot of talking points against ace people just copy terf rhetoric we are erasing gay and trans people our identities are not real none of our struggle is real either we are invading queer spaces we want to be oppressed so badly . Is the given statement hateful?	1	yes
The following statement was labeled hateful by 50% annotators: i would love to shoot a nigger in the head while jabbing an ice pick into a kikes eyesocket . Is the given statement hateful?	0	yes.
The following statement was labeled hateful by 50% annotators: god rest the man soul one question how many muzzies die on the street . Is the given statement hateful?	0	yes
The following statement was labeled hateful by 50% annotators: maybe he just thought you looked like a sand nigger because you are wearing a shemagh in your avatar pic like a sand nigger would . Is the given statement hateful?	0	yes
The following statement was labeled hateful by 50% annotators: dude financing and literally taking all their gold teeth and confiscating all their bank funds is not the same thing ok how about you research jews scheming for <number> fucking years kicked out of <number> countries <number> times for being around the corner yeah . Is the given statement hateful?	0	yes
The following statement was labeled hateful by 50% annotators: <user> who is muslim here . Is the given statement hateful?	1	no
The following statement was labeled hateful by 50% annotators: this is a nigger free zone . Is the given statement hateful?	0	yes.
The following statement was labeled hateful by 50% annotators: hey mother fucker i never give up so you keep on being a dumb normie and keep on pushing your fucking retarded neocon cocksucking are you a glow in the dark cia nigger . Is the given statement hateful?	0	yes.
The following statement was labeled hateful by 50% annotators: <user> i can not push him away when he in position he will do his thing he will pull out when he done sounds like a daughter who has been repeatedly raped by her father . Is the given statement hateful?	1	yes
The following statement was labeled hateful by 50% annotators: gross muslimes are against same sex attraction disorder sad yes against fruit cakes but man goats are ok sick bunch sharia my arse . Is the given statement hateful?	0	yes
The following statement was labeled hateful by 50% annotators: to calm my nerves i flame ah backwood up now im like ching chong 😌 🍃 🌬 . Is the given statement hateful?	0	yes.
The following statement was labeled hateful by 50% annotators: kike spic nigger faggot allah sucks kid dicks jews did <number> <number> white power 4 th reich hitler did nothing wrong . Is the given statement hateful?	0	yes.
The following statement was labeled hateful by 50% annotators: good luck firing him he will find a kike lawyer and sue on the grounds that he was fired because yu iz rayciss . Is the given statement hateful?	0	yes
The following statement was labeled hateful by 50% annotators: this is the year you all get r kelly the fidduck out of here sick of that nigger . Is the given statement hateful?	0	yes.
The following statement was labeled hateful by 50% annotators: operation nigger cull in london has dramatically improved following the distribution of firearms within local tribes . Is the given statement hateful?	0	yes.
The following statement was labeled hateful by 50% annotators: i always thought that nailing chicks age <number> when you are in early 3 0 is like an accomplishment minus the gook part but not casting aspersions . Is the given statement hateful?	0	yes.
The following statement was labeled hateful by 50% annotators: <user> <user> <user> he dindu nuffin . Is the given statement hateful?	1	yes.
The following statement was labeled hateful by 50% annotators: why would i read the bible that kike created faggoty anti white shit is for low t fuckbois like you speaking of which been touched by any priests lately in that kike run pedophile cult . Is the given statement hateful?	0	yes.
The following statement was labeled hateful by 50% annotators: the best way to solve the nigger problem is to take a piece of land force the niggers onto the land build a wall around it and call the country niggerdom within one year the niggers would have killed each other off . Is the given statement hateful?	0	yes.
The following statement was labeled hateful by 50% annotators: <user> i just do not think you know how the justice system works is this a white person thing . Is the given statement hateful?	1	no
The following statement was labeled hateful by 50% annotators: go live with your beloved niggers should be the only response to this kind of shit from now on oh u hate white ppl do u live in a shitty ghetto with blacks y not . Is the given statement hateful?	0	yes.
The following statement was labeled hateful by 50% annotators: a nigger bich will never have strait hair so keep wearing dat horsehair weave . Is the given statement hateful?	0	yes
The following statement was labeled hateful by 50% annotators: <user> holocaust is a big lie there is no evidence about that holocaust_big_lie . Is the given statement hateful?	0	yes
The following statement was labeled hateful by 50% annotators: its spooky season this year ill dress as a slut so i dont have to buy a costume 🥰 . Is the given statement hateful?	1	yes.
The following statement was labeled hateful by 50% annotators: <user> shut the fuck up kike enabler . Is the given statement hateful?	0	yes.
The following statement was labeled hateful by 50% annotators: lololol do not comment above your paygrade kike . Is the given statement hateful?	0	yes.
The following statement was labeled hateful by 50% annotators: mormonism is the american equivalent of heeb larping . Is the given statement hateful?	1	yes
The following statement was labeled hateful by 50% annotators: <user> <user> <user> <user> all the real gay 😍 we deserve more than scraps and queerbaiting and we get that with this show and the queer characters have identities and personalities that are not just queer . Is the given statement hateful?	1	no
The following statement was labeled hateful by 50% annotators: now there are claims coming from nbc news of all places that confirm what others have warned about isis has indeed infiltrated refugee camps so much so that military pilots refuse to fly over the infested camps . Is the given statement hateful?	1	no
The following statement was labeled hateful by 50% annotators: wishing the happiest birthday to my favorite crackhead <user> love u bitch . Is the given statement hateful?	1	yes
The following statement was labeled hateful by 50% annotators: crazy stupid nigger . Is the given statement hateful?	0	yes
The following statement was labeled hateful by 50% annotators: kathy griffin is the ultimate liberal attack somebody and suffer consequences and she is the victim cunt needs to have some dick forced up he dyke ass barron trumps . Is the given statement hateful?	0	yes.
The following statement was labeled hateful by 50% annotators: sleeping alone is ghetto 😭 . Is the given statement hateful?	1	no.
The following statement was labeled hateful by 50% annotators: i fucking hate you now bitch . Is the given statement hateful?	1	yes
The following statement was labeled hateful by 50% annotators: i understand nazi faggot code you are calling it quits but we both knew you would fag out lol . Is the given statement hateful?	0	yes.
The following statement was labeled hateful by 50% annotators: is that chief alinskyite chitownboystownbathhouseboi rahm emmanuel looks sounds like that kike . Is the given statement hateful?	0	yes
The following statement was labeled hateful by 50% annotators: go be a nigger somewhere else . Is the given statement hateful?	0	yes.
The following statement was labeled hateful by 50% annotators: sorry folks but the news i am reading this am infuriates me the stupidity the ignorance of the voters and elected officials of western countries is bringing the frigging chickens home to roost and i give a shit less about wonderful raghead cabbies and doctors . Is the given statement hateful?	0	yes
The following statement was labeled hateful by 50% annotators: you can see the gook genes . Is the given statement hateful?	0	yes.
The following statement was labeled hateful by 50% annotators: charlton heston i fucking hate you for keeping my family apart from me . Is the given statement hateful?	1	yes.
The following statement was labeled hateful by 50% annotators: getting sick of not taking action everyone a kike . Is the given statement hateful?	0	yes
The following statement was labeled hateful by 50% annotators: there is no such thing as trans it is called queer or freak . Is the given statement hateful?	0	yes
The following statement was labeled hateful by 50% annotators: my point is are you gonna defend the usa and your property from the jews yes or no . Is the given statement hateful?	0	yes
The following statement was labeled hateful by 50% annotators: you tell a nigga that we just fucking he hit me with the so when u become my bitch boy what 🙄 . Is the given statement hateful?	1	yes.
The following statement was labeled hateful by 50% annotators: hey let set up a small white ethnostate inland somewhere the globalists will not serbian our asses . Is the given statement hateful?	0	yes.
The following statement was labeled hateful by 50% annotators: still not winning oreilly out over sex harassment claims turns out that mmfa organized the whole thing we are still not winning and trump is not after soros and the rest when is there going to be justice . Is the given statement hateful?	1	yes
The following statement was labeled hateful by 50% annotators: u r such a fuckin hoe i love it u r such a fuckin hoe i love it u r such a fuckin hoe i love it ur boyfriend a dork mclovin . Is the given statement hateful?	1	yes.
The following statement was labeled hateful by 50% annotators: ob die sand nigger sich mit dem schwert abschlachten oder mit bomben und mp wenn die grenzen dicht sind und keiner von denen in weiße länder kommen kann sehe ich es eher positiv es hilft gegen die überbevölkerung und sichert deutsche arbeitsplätze . Is the given statement hateful?	0	yes
The following statement was labeled hateful by 50% annotators: <user> jesus is gay bt he the good kind of gay not like them fucking gay ponies . Is the given statement hateful?	0	yes
The following statement was labeled hateful by 50% annotators: <user> jihadi relax soon you will also sink in pain and anguish of your jihadi brothers being killed by indian armed forces . Is the given statement hateful?	0	yes
The following statement was labeled hateful by 50% annotators: dubai is moslem country the dude is being charged with consumption of alcohol aside from the other charges that does not even make sense if alcohol is banned there because it haram why are there bars that serve it moslems just being nuissances . Is the given statement hateful?	0	yes
The following statement was labeled hateful by 50% annotators: jews are disgusting subhuman animals the world would be so much better if every jew died tomorrow words can not describe how much i hate the rat faced kike vermin . Is the given statement hateful?	0	yes.
The following statement was labeled hateful by 50% annotators: <user> this week in shitware computer aided pseudo phrenology with weak correlation let us see how this will and probably already has been misused will not be long before a smartphone app appears that predicts character traits based on social media data machine learning . Is the given statement hateful?	1	no
The following statement was labeled hateful by 50% annotators: why are these white women being picked on 🙄 . Is the given statement hateful?	1	yes.
The following statement was labeled hateful by 50% annotators: <user> illegal immigrants r thrown out of every country now if all the muslims r not welcome in muslim countries and will end up going to non muslim countries wat u expect will happen mexicans r not muslims tell me why no muslim immigrant is welcome in ne muslim country . Is the given statement hateful?	1	yes
The following statement was labeled hateful by 50% annotators: <user> <user> <user> <user> kick that raghead out of america . Is the given statement hateful?	0	yes.
The following statement was labeled hateful by 50% annotators: britain investigates facebook ads meanwhile they laugh when little girls get raped by muslims . Is the given statement hateful?	0	yes
The following statement was labeled hateful by 50% annotators: i will disparage nehlen for marrying a beaner all i please tyvm . Is the given statement hateful?	0	yes
The following statement was labeled hateful by 50% annotators: y know how rich black athletes move from the ghetto into the mansion district and immediately try to turn their new neighborhood into an upscale ghetto that is exactly what the liberals migrating to fl are doing turning it into a purple state go back to your liberal northern shit holes . Is the given statement hateful?	0	yes
The following statement was labeled hateful by 50% annotators: cash money makin fuck with smoke this nigger fucking it . Is the given statement hateful?	1	yes
The following statement was labeled hateful by 50% annotators: so glad the leader of the hillbilly mafia is not in the white house happy 4 th . Is the given statement hateful?	1	yes.
The following statement was labeled hateful by 50% annotators: <user> le dindu nuffin lol . Is the given statement hateful?	1	yes
The following statement was labeled hateful by 50% annotators: i am interested in establishing an all white nation no jews no blacks no wetbacks no asians . Is the given statement hateful?	0	yes
The following statement was labeled hateful by 50% annotators: <user> <user> great poet . Is the given statement hateful?	1	no
The following statement was labeled hateful by 50% annotators: i cried like thunder i hate you september . Is the given statement hateful?	1	yes
The following statement was labeled hateful by 50% annotators: <user> i have to confess too i fucking hate you . Is the given statement hateful?	1	yes.
The following statement was labeled hateful by 50% annotators: deport that beaner spic to mexico . Is the given statement hateful?	0	yes
The following statement was labeled hateful by 50% annotators: beware also of queers posing as pepe kekistan supporters infiltrators aka infiltraitors . Is the given statement hateful?	1	yes.
The following statement was labeled hateful by 50% annotators: <user> how do groups of people take derogatory terms and reinvent them into positive ones like nigga and queer . Is the given statement hateful?	1	no
The following statement was labeled hateful by 50% annotators: <number> gun violence prevention hillary clinton campaign website still exploits and riffs on the name of the former leading lights of the gun control industry the brady campaign to prevent gun violence gun violence prevention we are working to prevent bloodshed not trying to take your guns away . Is the given statement hateful?	1	no
The following statement was labeled hateful by 50% annotators: i am even more concerned about mexican teenage tramps whose birth canals are like bazookas launching anchor beaners onto the lanscape of the united states . Is the given statement hateful?	0	yes
The following statement was labeled hateful by 50% annotators: another fucking dumb nigger with an i.q. of <number> . Is the given statement hateful?	0	yes.
The following statement was labeled hateful by 50% annotators: yeah that dumb nigger just took all the evil of the kikes and blamed the nazis for it and actually expected someone to believe it i would call him jidf but he is so stupid i can smell the nigger stench through my screen . Is the given statement hateful?	0	yes.
The following statement was labeled hateful by 50% annotators: roast this lying kike . Is the given statement hateful?	0	yes.
The following statement was labeled hateful by 50% annotators: god digs that trailer trash preacher <user> . Is the given statement hateful?	1	yes
The following statement was labeled hateful by 50% annotators: and it business <number> time same shitty news daily libtards being twats and trying to kill all the muzzies miss but fuckem . Is the given statement hateful?	0	yes.
The following statement was labeled hateful by 50% annotators: whatever you niggas doing to gay ppl i wish y ’ all would stop cuz gah dayum . Is the given statement hateful?	1	yes.
The following statement was labeled hateful by 50% annotators: gay minecraft porn . Is the given statement hateful?	1	yes
The following statement was labeled hateful by 50% annotators: <user> goddamn niggers population still at it shooting each other and blaming cops for their own influence to their nigger culture dumb niggers plan on pushing more communism and hate as so terrorism blacks are largely on the receiving end of communism whites are the ones pushing it toward them . Is the given statement hateful?	0	yes
The following statement was labeled hateful by 50% annotators: <user> <user> could not own property could not draw wills could be legally raped by their husbands and i will not even get into rights of black women or lack there of rather . Is the given statement hateful?	1	yes
The following statement was labeled hateful by 50% annotators: <user> <user> we are iraqi refugees we ask you to process our delayed files please standwithiraqirefugees . Is the given statement hateful?	1	no
The following statement was labeled hateful by 50% annotators: of course they are weak that is why they want the government to protect them same reason women do it amuse me when they dress up in black wear masks and try to scare veterans at rallys they d be killed if they ever made one of the vets mad . Is the given statement hateful?	1	yes
The following statement was labeled hateful by 50% annotators: <user> btch 🤣 🤣 🤣 🤣 🤣 here you go with your ghetto lingo bye . Is the given statement hateful?	1	yes.
The following statement was labeled hateful by 50% annotators: so this action by espn of dropping the sportscaster because of his name robert lee glaringly points out the reality of the left and how they are now the equal of the nazi brown shirts espn and others simply expect the violence that the dems gleefully promote and commit . Is the given statement hateful?	1	yes
The following statement was labeled hateful by 50% annotators: in a massachusetts a moslem scum is running for office while a member of terrorist group cair . Is the given statement hateful?	0	yes
The following statement was labeled hateful by 50% annotators: perfect just call nazi on the next corner sandnigger rape house one crosses . Is the given statement hateful?	0	yes.
The following statement was labeled hateful by 50% annotators: my mama told me it wrong to hate people so i just want you all to know i do not hate jews niggers faggots dykes fat bitch feminest cucks ragheads or illegals but i really really really fucking dislike them they should all die of ghoneria and rot in hell . Is the given statement hateful?	0	yes.
The following statement was labeled hateful by 50% annotators: exactly i d rather die than have a nigger or sandnigger doctor . Is the given statement hateful?	0	yes.
The following statement was labeled hateful by 50% annotators: <user> <user> a hindu refugee has roots with india in terms of religion muslim refugee can take refugee at a islamic country more over we cannot see more bomb blasts which start with ola ho uber . Is the given statement hateful?	0	yes
The following statement was labeled hateful by 50% annotators: messaged a jew on skype and he ignored me i am tired of these damn jews . Is the given statement hateful?	1	yes.
The following statement was labeled hateful by 50% annotators: i have to be better hunting that metaphorical white whale will not end well or even end at all . Is the given statement hateful?	1	no.
The following statement was labeled hateful by 50% annotators: i think antifa blm and the rest of the culturalmarxists that use violence to shut down people exercising the 1 stamendment really take advantage of the fact that we do not stoop to their level we need creative ways to counter though minus the violence . Is the given statement hateful?	1	yes.
The following statement was labeled hateful by 50% annotators: justin trudeau the traitor against canada deserves to be drowned slowly in a large pot of shit out of he asses of <number> jihadi terrorist that he let back in our country illegally . Is the given statement hateful?	0	yes.
The following statement was labeled hateful by 50% annotators: <user> <user> <user> except using drones to kill all those er younglings is that correct . Is the given statement hateful?	1	yes
The following statement was labeled hateful by 50% annotators: <user> girl yes lmfao people get on my nerves i know yo ass ready to use that ghetto gif . Is the given statement hateful?	1	yes
The following statement was labeled hateful by 50% annotators: sergei the faggot would prefer the nsdap had not burned gay pornography and books on transgender theory . Is the given statement hateful?	0	yes
The following statement was labeled hateful by 50% annotators: stupid meme delete now dont you dare put a kike on the boss face not even joking delete now . Is the given statement hateful?	0	yes.
The following statement was labeled hateful by 50% annotators: dykes love that lil black sports bra khaki pants combo . Is the given statement hateful?	1	yes
The following statement was labeled hateful by 50% annotators: <user> this is the non stop c*oning <censored> that is displayed by black women these negresses give a horrible impression on the true b1 sisters who are for black empowerment she was a white sacrifice and she will probably get the lowest sentence tammy the mammy . Is the given statement hateful?	1	yes.
The following statement was labeled hateful by 50% annotators: ‘ ’ niggas got tired of asking where the hoes at so they made an app ’ ’ 😭 😭 😭 😭 😭 . Is the given statement hateful?	0	yes.
The following statement was labeled hateful by 50% annotators: imagine actually thinking semites were more intelligent than whites or asians hahahahahaahahaha . Is the given statement hateful?	0	yes.
The following statement was labeled hateful by 50% annotators: makes you wonder who looked at this and thought wow this place really needs more niggers and camel jockeys . Is the given statement hateful?	0	yes.
The following statement was labeled hateful by 50% annotators: islam still practices slavery to this day slavery they even try to sell women on the internet think about that banislam . Is the given statement hateful?	0	yes
The following statement was labeled hateful by 50% annotators: jean lafitte ‏ <user> 3 9 <number> seconds ago more jean lafitte retweeted mark pantano how many more immigrants do we need none and we need to ship a whole lot back . Is the given statement hateful?	1	yes
The following statement was labeled hateful by 50% annotators: jew should be hated they are a disease that needs to eradicated from among white folk they and their subhuman nigger and arab foot soldiers are the enemy their annihilation is not up for negotiation . Is the given statement hateful?	0	yes.
The following statement was labeled hateful by 50% annotators: good idea you do not want to mix with those fat nigger bitches . Is the given statement hateful?	0	yes.
The following statement was labeled hateful by 50% annotators: all governments do is grow social tumors a giant sick green army a giant necrotic nigger colony a giant land pod of social workers . Is the given statement hateful?	0	yes
The following statement was labeled hateful by 50% annotators: white greeks are not white . Is the given statement hateful?	1	yes.
The following statement was labeled hateful by 50% annotators: there is no need for immigrants to assimilate into canadian culture but those that refuse will be deported back to the shit hole these savage illiterate low iq inbred retards came from or we can simply execute these human waste . Is the given statement hateful?	0	yes.
The following statement was labeled hateful by 50% annotators: i blame all the white guilt commie kike cuck dismay for this violence . Is the given statement hateful?	0	yes.
The following statement was labeled hateful by 50% annotators: no but mestizo spic sure is . Is the given statement hateful?	0	yes
The following statement was labeled hateful by 50% annotators: waiting on the beard twitter nigga holocaust . Is the given statement hateful?	0	yes
The following statement was labeled hateful by 50% annotators: trump has yet to fulfill a single promise he said he would instead he has resorted to cucky republicrat shit like tax cuts and super awesome trade deals with arabs and asians i am not a cheer leader this guy has done jack shit for me . Is the given statement hateful?	1	yes
The following statement was labeled hateful by 50% annotators: <user> bc at that point u literally become the boogyman that bigots always preach u know the whole they are going to rape us shit they would say years ago . Is the given statement hateful?	1	yes.
The following statement was labeled hateful by 50% annotators: yeah i am neither jewish nor a homosexual but they love to call me a kike faggot i mute freely <happy> . Is the given statement hateful?	1	yes.
The following statement was labeled hateful by 50% annotators: i can not tell one sand nigger from the next . Is the given statement hateful?	0	yes.
The following statement was labeled hateful by 50% annotators: <user> <user> white mode is elite . Is the given statement hateful?	1	no.
The following statement was labeled hateful by 50% annotators: real voice muslims world after bhutto is pmik imran khan voice of kashmir . Is the given statement hateful?	1	yes
The following statement was labeled hateful by 50% annotators: according to new polling data <number> of americans believe laura loomer raped lauren southern . Is the given statement hateful?	1	yes
The following statement was labeled hateful by 50% annotators: <user> i would post a reply to this on facebook but i am currently banned for <number> days for calling someone white trash as he was posting absolutely vile and horrible comments about greta thunberg yet i get banned i hope facebook burns . Is the given statement hateful?	1	yes
The following statement was labeled hateful by 50% annotators: comes back <number> minutes later with some black metal bullshit lyrics try to and prop up a shitty meme made by a gook fucker as a last stand damn i really did piss you off serously though just read mason book . Is the given statement hateful?	0	yes
The following statement was labeled hateful by 50% annotators: you mean red pills like it ok to fuck half nigger apes and an ethnostate can not work in america because muh magic dirt that not a red pill cuck faggot that jew bullshit that she been pushing from the beginning if you think that helpful kys . Is the given statement hateful?	0	yes.
The following statement was labeled hateful by 50% annotators: go get honor killed by your shitskin parents you ugly thot . Is the given statement hateful?	0	yes.
The following statement was labeled hateful by 50% annotators: <user> <user> i ’ m actually an arab muslim and i hate spicy food so many ppl don ’ t know that lmao . Is the given statement hateful?	1	no
The following statement was labeled hateful by 50% annotators: women talking about sex everyone she fake slut bitch men talking about sex everyone wo larka hai kar skta hai wo fuck this double standard ‼ . Is the given statement hateful?	1	yes
The following statement was labeled hateful by 50% annotators: dog is retarded he bit himself while scratching i need to get him some smart food lol . Is the given statement hateful?	1	yes
The following statement was labeled hateful by 50% annotators: knowing historical facts is now an example of white supremacy . Is the given statement hateful?	1	no.
The following statement was labeled hateful by 50% annotators: all those illegal bangladeshi muslim immigrants tweeting from fake hindu bengali account with the trend go back amit shah your time is up no matter how much your mumtaz begum tries to save you you guys are going to get kicked out start counting your days . Is the given statement hateful?	0	yes
The following statement was labeled hateful by 50% annotators: obama for eight years worked e to destroy american obama sided with criminals and the illegal border crashers so here we are with violence everywhere in the streets and for god sake europe applauding the idea of killing an american president . Is the given statement hateful?	0	yes
The following statement was labeled hateful by 50% annotators: cowardly actions by the pussy brits men let their women be gangraped by moslim animals should change countrys name to cuckland . Is the given statement hateful?	0	yes
The following statement was labeled hateful by 50% annotators: anti queer and anti choice sentiments are simmering under canadians noses we need to be strategic and organized in blocking these efforts they are well funded and enjoy police protection . Is the given statement hateful?	1	yes
The following statement was labeled hateful by 50% annotators: dear america for context <number> young vulnerable white underage children were groomed raped abused sodomised by muslims in complete freedom with full knowledge of all the authorities because of fear of offending the muslims gotrump . Is the given statement hateful?	0	yes
The following statement was labeled hateful by 50% annotators: <user> is a creative external processor of emotions queer black tweeter and meme connoisseur from england matthias works to create a safe space for everyone to feel that they are not alone and that their experiences are valid he also enjoys getting rather silly . Is the given statement hateful?	1	no
The following statement was labeled hateful by 50% annotators: <user> <user> i hate you 😭 😭 😭 😭 💀 . Is the given statement hateful?	1	yes.
The following statement was labeled hateful by 50% annotators: bitch what natural flavour is neon blue . Is the given statement hateful?	1	yes
The following statement was labeled hateful by 50% annotators: it all racist it was all discovered by white people whites and asians tend to do well in it its a highly advanced system of greek and european origin its all raciss n shit or maybe whites and asians are just smarter maybe privilege has nothing to do with it . Is the given statement hateful?	1	yes.
The following statement was labeled hateful by 50% annotators: oloriebi who sees morieba and moremi as potential opponents tries to blackmail morieba using her queer status enjoy this beautiful read for n2500 only laki rib o to chronicles a brief history of badly behaved women ayodele olof in tua de african literature the book dealer ng . Is the given statement hateful?	1	yes
The following statement was labeled hateful by 50% annotators: the handmaid tale is a jewish litmus test to see how retarded women have become . Is the given statement hateful?	0	yes
The following statement was labeled hateful by 50% annotators: <user> definitely blacks white people are not surprised when it an actually unjustified shooting there justice but ya know you people like to immediately just to conclusions before all the facts have come out on every single shooting . Is the given statement hateful?	1	yes
The following statement was labeled hateful by 50% annotators: sadly this site has ended up as a boring white nationalist ghetto which means that gab is not going to ever take off bigly as much as liberal baloney bores the living crap out of me this place needs more ulp diversity of thought sorry . Is the given statement hateful?	1	yes
The following statement was labeled hateful by 50% annotators: <user> <user> <user> you must understand dear media is under globalist and globalist wants civil war in the world that why they using islamists ppl in europe against white n india also . Is the given statement hateful?	1	yes
The following statement was labeled hateful by 50% annotators: <user> <user> when i saw video of her family members walking in the courtroom they all looked like white supremacist klansmen especially the males they did not look like they were used to wearing suits they d be more comfortable in white robes . Is the given statement hateful?	1	yes
The following statement was labeled hateful by 50% annotators: <user> church for a homo told jesus could deliver me from homosexuality coz it a sin i had hope it failed i lost my young life hating myself faking a smile and hoping for change my future looked empty i cried in silence attempted suicide . Is the given statement hateful?	1	yes
The following statement was labeled hateful by 50% annotators: <user> women were gang raped in his house is it true women body found in backside gutter kf tahir . Is the given statement hateful?	1	yes
The following statement was labeled hateful by 50% annotators: how can you fall in love with a guy when he flirting with <number> other women the bachelor . Is the given statement hateful?	1	yes
The following statement was labeled hateful by 50% annotators: you all asking that white ass man to press hope about the cns twists is the equivalent to when jay park spoke to white ass man <number> . Is the given statement hateful?	1	yes.
The following statement was labeled hateful by 50% annotators: <user> you need potassium eat a banana you fucking nigger . Is the given statement hateful?	0	yes.
The following statement was labeled hateful by 50% annotators: i want to hate you but i can not 😞 . Is the given statement hateful?	1	no
The following statement was labeled hateful by 50% annotators: <user> you will have boys get raped at school at ohio state university why have not you can dim donald trump comment about civil war . Is the given statement hateful?	1	yes
The following statement was labeled hateful by 50% annotators: our free speech is starting to go too in little ways trying to make people think it is for good hurt feelings or inciting violence bullsh*t <censored> unfortunately many people do not see it . Is the given statement hateful?	1	yes
The following statement was labeled hateful by 50% annotators: <user> shut up ching chong . Is the given statement hateful?	0	yes.
The following statement was labeled hateful by 50% annotators: a friend of a friend was run over her husband killed by a mussie in the uk run over and back over he backed up this was no accident she is still battling to get compensation and heal . Is the given statement hateful?	1	yes
The following statement was labeled hateful by 50% annotators: notourvoice these people are doing more damage than good for muslims they must be boycotted they are not voice of muslims for sure . Is the given statement hateful?	1	yes
The following statement was labeled hateful by 50% annotators: sdorica is a fucking drug . Is the given statement hateful?	1	yes
The following statement was labeled hateful by 50% annotators: if i see one more of you niggers say it cocktober . Is the given statement hateful?	0	yes.
The following statement was labeled hateful by 50% annotators: i love white women . Is the given statement hateful?	1	yes
The following statement was labeled hateful by 50% annotators: <number> i be queer . Is the given statement hateful?	1	no.
The following statement was labeled hateful by 50% annotators: owaisi crying <number> rohingyas has never have tears for <number> kashmiri hindu pundits killed tortured raped driven away from their homes with anouncements 4 m masjids support of rohingyas b deshi muslims is for change demography for muslim majority to turn india into hell <number> hindus . Is the given statement hateful?	1	yes
The following statement was labeled hateful by 50% annotators: lmao for a minute i thought he just did it since he been shadowing trump continually this 💩 muslim traitor leader of ofa is very active if not out in the open in the background . Is the given statement hateful?	1	yes
The following statement was labeled hateful by 50% annotators: noted you did not deny being a nigger lover now run along i have not got time to waste replying to sluts like you ok have a nice night . Is the given statement hateful?	0	yes.
The following statement was labeled hateful by 50% annotators: hmm wow cant say im cool with that you guys will have to drop that kike or im out tbh <user> ‍ <user> ‍ . Is the given statement hateful?	0	yes.
The following statement was labeled hateful by 50% annotators: i need more gay friends 🏳 ️ ‍ 🌈 . Is the given statement hateful?	1	no.
The following statement was labeled hateful by 50% annotators: every women i have been with was inserted in my life to teach me something it seems . Is the given statement hateful?	1	no.
The following statement was labeled hateful by 50% annotators: lesson of the week from the holy book the sovereign individual once commerce flows over the internet suppression of speech becomes unstoppable devolution inevitable and the monopoly of violence by governments will end paraphrased from j d davidson rhys mogg . Is the given statement hateful?	1	no.
The following statement was labeled hateful by 50% annotators: sad how we teach girls how to not get raped do not walk at night carry pepper spray do not trust strangers instead of teaching boys how not to rape respect women and understand concent gender forum . Is the given statement hateful?	1	yes
The following statement was labeled hateful by 50% annotators: yeah right you are all niggers nope you are all sand niggers open your borders jews are gods chosen . Is the given statement hateful?	0	yes
The following statement was labeled hateful by 50% annotators: tht bisexual person who said dyke apologized for it and deleted the tweet and all ppl are replying under the apology is stream my fancam and __ stans follow me like some ppl are so generic and unfunny it hurts . Is the given statement hateful?	0	no.
The following statement was labeled hateful by 50% annotators: i agree with you <number> those dam jew rats are ruining america with wars and their perverted agendas just like all the other white countries they invade and then destroy best to gas every last one of those parasite jews . Is the given statement hateful?	0	yes.
The following statement was labeled hateful by 50% annotators: merkel is not minister of germany she is euro president of the human extinction movement all kommies no matter where resolve to genocide todays cultural marxists and sjw are just kommies without an ak47 they use musloid terrorist proxies . Is the given statement hateful?	0	yes.
The following statement was labeled hateful by 50% annotators: you have no clue what you are doing other than sucking a kike dick try fuck off i am sick of listening to your kike apologies . Is the given statement hateful?	0	yes.
The following statement was labeled hateful by 50% annotators: <user> bataclan wasnt for protecting jews was for what happened in russia . Is the given statement hateful?	1	yes
The following statement was labeled hateful by 50% annotators: why would that lil black girl lie about them white kids cutting her dreads that why they play hella games wid black people already annoying as fuck . Is the given statement hateful?	1	yes.
The following statement was labeled hateful by 50% annotators: so you are not a kike just a cucked kike ball washer then my nightmare you give yourself too much credit the only one who consistently shitter shattered about my posts is you i have gained steady followers from my posts itt i will keep posting especially so your old pissflaps stay irritated . Is the given statement hateful?	0	yes.
The following statement was labeled hateful by 50% annotators: true acne vulgaris in adult women may be due pregnancy or disorders such as polycystic ovary syndrome hirsutism or cushing syndrome . Is the given statement hateful?	1	no
The following statement was labeled hateful by 50% annotators: thanks for the offer but eating shit it your nigger delicacy . Is the given statement hateful?	0	yes.
The following statement was labeled hateful by 50% annotators: he just throwing that hoe up . Is the given statement hateful?	1	yes.
The following statement was labeled hateful by 50% annotators: i know im too young to carry a gun but does not the 2 nd amendment give me the constitutional right to defend myself by smearing wet dog shit on little toddler niglet girls who wander away from their teenage alcoholic drug addicted single mothers 🇺 🇸 ✝️ 🇺 🇸 ✝️ 🇺 🇸 ✝️ . Is the given statement hateful?	0	yes.
The following statement was labeled hateful by 50% annotators: actually they were white people and no one cares . Is the given statement hateful?	1	yes
The following statement was labeled hateful by 50% annotators: good this is not a shithole country it should remain white and all the shit stains should be told the truth you were imported in to ruin the country that was your role . Is the given statement hateful?	0	yes
The following statement was labeled hateful by 50% annotators: <user> im a <number> year single straiaght white christian man im enemy <number> . Is the given statement hateful?	1	yes
The following statement was labeled hateful by 50% annotators: my brother calls me versace sensei for some reason and everyone thinks i am some weird bitch when he screams it to me . Is the given statement hateful?	1	no.
The following statement was labeled hateful by 50% annotators: you have never done anything but seek out paul town enemies and get mad because you are friends with a kike who needs help from several people to defend against me . Is the given statement hateful?	0	yes
The following statement was labeled hateful by 50% annotators: you are a kike loving nigger who still uses your mom insults you should just do the world a favor and attach yourself to the end of a rope . Is the given statement hateful?	0	yes.
The following statement was labeled hateful by 50% annotators: what nation has a jew started what nation hate to burst your yid cum bubble israel was annexed from a native population of semites under brittish rule and granted to another group of sand niggers so i ask again name <number> fucking nation kikes made again i will wait . Is the given statement hateful?	0	yes
The following statement was labeled hateful by 50% annotators: low fi whiteskins worry about jew milo while he tells them white nationalism is wrong and bad and avoid it what is wrong with you whitesies people you have a red rubber ball on your nose and your brains are tough as steamed tilapia . Is the given statement hateful?	0	yes
The following statement was labeled hateful by 50% annotators: fakenews is following hillary example blame everyone else for causing the violence even though they say kill and fight in their articles bye bye fake guys . Is the given statement hateful?	1	yes
The following statement was labeled hateful by 50% annotators: being a moslem has got to be the worst punishment in the world . Is the given statement hateful?	0	yes
The following statement was labeled hateful by 50% annotators: someone who still has a twitter account please tell this kike ass kisser that there are far more high iq white people in american then there are jews in existence jews get into positions because of nepotism not merit . Is the given statement hateful?	0	yes.
The following statement was labeled hateful by 50% annotators: <user> now it a humanitarian crisis because he wants to declare an emergency he doesnt see refugees as humans resigntrump . Is the given statement hateful?	1	yes
The following statement was labeled hateful by 50% annotators: we are all responsible white guy commentary on strike sign saying white people are responsible for climate change . Is the given statement hateful?	1	yes
The following statement was labeled hateful by 50% annotators: cnn in selma alabama right now invoking all the civil rights stuff saying african americans saved alabama by voting last night im giving it <number> yrs for widespread white persecution if something dont change . Is the given statement hateful?	0	yes
The following statement was labeled hateful by 50% annotators: liberals want women raped at the hands of 3 rd world refugees who carry unheard of diseases these muslim refugees will enslave your beautiful daughters and when you are crying about it the liberals will scream you are racist liberals will destroy your lives and laugh at your child demise . Is the given statement hateful?	0	yes.
The following statement was labeled hateful by 50% annotators: <user> <user> how are you not <number> lbs by now 😱 they all look so good ♥️ . Is the given statement hateful?	1	yes.
The following statement was labeled hateful by 50% annotators: that rouge jewess as if there is any other kind called for complete genocide of palestinians her name is ayelet sheked when she does not call for genocide of people she stole land from she whinies about holohoax typical kike shenanigans disgusting rats . Is the given statement hateful?	0	yes.
The following statement was labeled hateful by 50% annotators: personally i would prefer to see chimps with rpgs move into the house next door than let more muslims have access to nuke technology people who think more muzzies with a bombs would be wonderful can explain themselves . Is the given statement hateful?	0	yes
The following statement was labeled hateful by 50% annotators: i only ask because if it a nigger than i care a little less back to your parenting theory nonsense parenting literally applies when you are well a child parent if someone said gas these jew babies i was like meh that would not be bad parenting . Is the given statement hateful?	0	yes.
The following statement was labeled hateful by 50% annotators: also that he a faggot and serial mudshark . Is the given statement hateful?	0	yes.
The following statement was labeled hateful by 50% annotators: <user> <user> etnic supremacism the nazis did not think they we are wrong blood and nation . Is the given statement hateful?	1	yes
The following statement was labeled hateful by 50% annotators: <user> do you see many immigrants wearing sandals flip flops in the snow like we do here . Is the given statement hateful?	1	no
The following statement was labeled hateful by 50% annotators: ahem that nigger with trump hat you right wing sjw . Is the given statement hateful?	0	yes.
The following statement was labeled hateful by 50% annotators: that nigger loving ginger is a disgrace to the great kings and queens of england who would never have tolerate a nigger in the royal family . Is the given statement hateful?	0	yes.
The following statement was labeled hateful by 50% annotators: just a reminder for my gab brothers and sisters to make noise about tell your friends and boycott time warner netflix starbucks patagonia and raise awareness about chobani yogurt connection to the rape of a <number> year old girl by muslimes in twin falls idaho speak with your wallet . Is the given statement hateful?	0	yes
The following statement was labeled hateful by 50% annotators: fuck the royals big pals with the rothschild what a mix a ginger cunt a thick paddy bastard and a nigger not my princess . Is the given statement hateful?	0	yes.
The following statement was labeled hateful by 50% annotators: he does not care if america goes brown and shitskins are anti free speech show me one shitskin country with free speech shaprio is a fast talking jew tool . Is the given statement hateful?	0	yes
The following statement was labeled hateful by 50% annotators: hey if the left want refugees so bad over here bring on the swedish blondes lol . Is the given statement hateful?	1	yes
The following statement was labeled hateful by 50% annotators: i am that nigga you love . Is the given statement hateful?	1	yes.
The following statement was labeled hateful by 50% annotators: <user> <user> happy birthday muzzy 🐻 . Is the given statement hateful?	1	no.
The following statement was labeled hateful by 50% annotators: more kike propaganda in europe almost no one circumcises their boys it genital mutilation . Is the given statement hateful?	0	yes
The following statement was labeled hateful by 50% annotators: fucking hell man yes i know a tall chinaman too why must everyone think anecdotes trump statistics you people are going to kill us all . Is the given statement hateful?	1	yes
The following statement was labeled hateful by 50% annotators: trump was wrong in charlottesville the alt left was worse than the alt right bc they were the ones who started the violence as usual these rabid commie filth condemn us for violence we have not committed while flinging bricks at us and they think they have got the moral high ground lol . Is the given statement hateful?	1	yes.
The following statement was labeled hateful by 50% annotators: never cared about what another bitch got going on . Is the given statement hateful?	1	yes.
The following statement was labeled hateful by 50% annotators: for crying out loud millions if children are abused mentally ohydically emotionally are raped sexually abused every day do you want more . Is the given statement hateful?	1	yes
The following statement was labeled hateful by 50% annotators: jews are a race of greedy little rat faced beady eyed hook nosed cunts atheism is an ideal about god do you honestly think the two are mutually exclusive that is some nigger level of brain power right there . Is the given statement hateful?	0	yes.
The following statement was labeled hateful by 50% annotators: fuck these whine tit leftist fuck their rock singers fuck their rap stars fuck their child molesting politicians fuck their sympathy for retarded foreigners and bad actors fuck their gay ass sitcoms fuck their lame late night comedians fuck their white hate fuck their patriotic disloyalty . Is the given statement hateful?	0	yes.
The following statement was labeled hateful by 50% annotators: more kike propaganda this idea is also part of the jew plan for extermination promote masturbation in white men so that their desire for family and white children is diminished . Is the given statement hateful?	0	yes
The following statement was labeled hateful by 50% annotators: typical kyke nigger your breed of autism is cancer chemo the stupid . Is the given statement hateful?	0	yes.
The following statement was labeled hateful by 50% annotators: big small either way the dicks are in your mouth nigger . Is the given statement hateful?	0	yes.
The following statement was labeled hateful by 50% annotators: lol trump jr fucked around on his kike wife with mudshark aubrey o day the altright really knows how to pick em . Is the given statement hateful?	0	yes.
The following statement was labeled hateful by 50% annotators: it ll probably be some fat negress in a nursing home anyways so fuck em both . Is the given statement hateful?	0	yes.
The following statement was labeled hateful by 50% annotators: trash that queer lgbt people feel the need to find someone in our community to oppress like fuckin stop that shit it ugly . Is the given statement hateful?	0	yes.
The following statement was labeled hateful by 50% annotators: gettin real tired being constantly told how stupid americans are you think you are any better with these sand niggers replacing you hell at least we had the sense to not let them in faggots or at least not by the boatloads . Is the given statement hateful?	0	yes
The following statement was labeled hateful by 50% annotators: <user> y are u focusing on that when nazis exist . Is the given statement hateful?	1	yes.
The following statement was labeled hateful by 50% annotators: you have to be one of the absolute dumbest motherfuckers on gab i am muting you now i d say good luck with your libertarian fantasies but i would not mean it in your case because i actually hope you get raped by a pack of nogs . Is the given statement hateful?	0	yes.
The following statement was labeled hateful by 50% annotators: <user> he exactly the type to say ah ha ha do not kill yourself you are so sexy haha . Is the given statement hateful?	1	yes.
The following statement was labeled hateful by 50% annotators: what an ugly bitch and a moozie fucking whore drag it into court and start asing questions from gowdy . Is the given statement hateful?	0	yes
The following statement was labeled hateful by 50% annotators: if youre acting like a faggot i will certainly call you one faggot . Is the given statement hateful?	0	yes.
The following statement was labeled hateful by 50% annotators: they e all gay pakistan has more male prostitutes than any other country most paki men have had homosexual sex with other men and boys sick fucks . Is the given statement hateful?	0	yes
The following statement was labeled hateful by 50% annotators: working <number> days a week is ghetto but i ’ m still going 😭 . Is the given statement hateful?	1	yes
The following statement was labeled hateful by 50% annotators: huma is a muzrat spy married to a congressman and advising killary . Is the given statement hateful?	0	yes
The following statement was labeled hateful by 50% annotators: <user> its probably indonesian malaysian muslims who retweeted it . Is the given statement hateful?	1	yes
The following statement was labeled hateful by 50% annotators: <user> <user> they hate you white man . Is the given statement hateful?	1	yes
The following statement was labeled hateful by 50% annotators: <user> <user> i hate you ’ z . Is the given statement hateful?	1	yes.
The following statement was labeled hateful by 50% annotators: thank god for aubameyang as well it shuts all them fucking mckola and howson faggots up as well two wankstains then again it hard to come across a united fan who is not . Is the given statement hateful?	1	yes
The following statement was labeled hateful by 50% annotators: these bitchass niggas bashing others for binge watching got should just fuck out of here ugot ayingowakulo bani . Is the given statement hateful?	1	yes
The following statement was labeled hateful by 50% annotators: <user> <user> <user> <user> she wasn t talking about illegal aliens she clearly said immigrants and refugees i still know the difference one type is here doing it the correct way and the others are law breaking invaders please see the sarcasm 🤔 🤔 🤔 . Is the given statement hateful?	1	yes
The following statement was labeled hateful by 50% annotators: if white nationalist want to rally they should have all rights to feel safe and be protected by police same goes for blm antifa gays everyone unless its reason to believe its for violence . Is the given statement hateful?	1	no.
The following statement was labeled hateful by 50% annotators: <user> all <number> muslim countries in the world should give shelter rohingyas . Is the given statement hateful?	1	yes
The following statement was labeled hateful by 50% annotators: <user> fuck off then language of the streets where i am from it also got you too notice a no pc bullshit here lady children being raped and you dare say about language exactly why not enough being done too busy pissing about with your niceties . Is the given statement hateful?	1	yes
The following statement was labeled hateful by 50% annotators: finally catching up on power tired of you niggers tryna spoil it on the tl lol . Is the given statement hateful?	0	yes.
The following statement was labeled hateful by 50% annotators: justiceforduamalah justice for dua malah seven year old found naked and raped in thatta . Is the given statement hateful?	1	yes
The following statement was labeled hateful by 50% annotators: because you are not a nog or a kike . Is the given statement hateful?	0	yes.
The following statement was labeled hateful by 50% annotators: trump should try to impeach the wetback jew justices who performed gay marriages but did not recuse themselves from the gay marriage ruling . Is the given statement hateful?	0	yes.
The following statement was labeled hateful by 50% annotators: jews are parasites muslims are shit beaners suck and niggers are dumb and violent . Is the given statement hateful?	0	yes
The following statement was labeled hateful by 50% annotators: <number> hours remaining of my <number> day ban on twitter my next move is to completely overwhelm twitter thought police with hate speech allegations for everyone who is a kike and especially the adl . Is the given statement hateful?	0	yes.
The following statement was labeled hateful by 50% annotators: jews and arabs will destroy america . Is the given statement hateful?	0	yes
The following statement was labeled hateful by 50% annotators: i just can ’ t vibe and party with anybody ready for my bitch to be with me in november . Is the given statement hateful?	1	no.
The following statement was labeled hateful by 50% annotators: watching crazy rich asians instead of raw mwah 💋 . Is the given statement hateful?	1	no
The following statement was labeled hateful by 50% annotators: <user> <user> be careful sir you might keep moving right into our neighbouring country god only knows how they treat refugees . Is the given statement hateful?	1	yes
The following statement was labeled hateful by 50% annotators: <user> what if a muslim refugee lies says that he was persecuted because he had converted to any of these religions but reverts back to islam after getting indian citizenship taklu is fooling bengalis fact is that they dumped citizenship amendment bill after opposition in ne states . Is the given statement hateful?	1	yes
The following statement was labeled hateful by 50% annotators: <user> had this ru jewish boss who was obsessed with capitalism scared of the us becoming too different aka brown and eternally grateful to reagan for giving him an opening to be a refugee in the 8 0 of course he was the right kind of immigrant lol . Is the given statement hateful?	1	yes
The following statement was labeled hateful by 50% annotators: <user> she was screaming nigger and that she wish she could kill all the niggers in public at a cvs bitch . Is the given statement hateful?	0	yes
The following statement was labeled hateful by 50% annotators: my german american friend tells me my godfather views matter because he is a significant figure in national politics as the founder of a major political party on the right if he is not as wildly upset about refugees as you are then maybe you are missing the reality of germany today . Is the given statement hateful?	1	no
The following statement was labeled hateful by 50% annotators: almost four in <number> women in oklahoma have experienced physical violence by an intimate partner in their lifetime the national intimate partner and sexual violence survey . Is the given statement hateful?	1	no
The following statement was labeled hateful by 50% annotators: need them white malteser truffles in my life . Is the given statement hateful?	1	no.
The following statement was labeled hateful by 50% annotators: coworker why has not green day been cancelled for singing kill all the fags who disagree me cause green day cancelled themselves by being a trash band since dookie was released in <number> . Is the given statement hateful?	1	yes
The following statement was labeled hateful by 50% annotators: hot girl summer really turned me into a hoe . Is the given statement hateful?	1	no.
The following statement was labeled hateful by 50% annotators: <user> vincent d onofrio is a fucking actor lol what he got going on that is relatable to us in any way he white has money probably never had a fight in his life never had to hustle piff or crills just to eat or avoiding getting shot . Is the given statement hateful?	1	yes
The following statement was labeled hateful by 50% annotators: should i have been an athlete is this where they are hiding all the niggers . Is the given statement hateful?	0	yes
The following statement was labeled hateful by 50% annotators: mid tipperary minor football full time moyne templetuohy thurles gaels <number> <number> <number> gortnahoe glengoole <number> <number> <number> . Is the given statement hateful?	1	no
The following statement was labeled hateful by 50% annotators: <user> that just means your professor a little bitch lmao . Is the given statement hateful?	1	yes
The following statement was labeled hateful by 50% annotators: imma visit you with a tupac shirt with a bulletproof vest underneath and talk all ghetto and hiet imma call maself tyrone and see if you pop me playboi if i survive the ordeal i will mail the tape to just for laughs . Is the given statement hateful?	1	yes.
The following statement was labeled hateful by 50% annotators: maxwell is a stupid nigger who will never get blacks to vote republican in meaningful numbers before the spics already demographically take over the country . Is the given statement hateful?	0	yes.
The following statement was labeled hateful by 50% annotators: are caucasians crazy just hand over countries even continents to muzzles to terrorists murderers rapists pedophiles homophobes sadists who pretend to be religious who hang gays stone adulterers lash women who have been raped . Is the given statement hateful?	0	yes
The following statement was labeled hateful by 50% annotators: some nigger trying to sell me an ebook . Is the given statement hateful?	0	yes.
The following statement was labeled hateful by 50% annotators: jasmine tweeted this man job and still got to tweet and i told drew brees i beg your nigger ass pardon and got disabled for <number> hours . Is the given statement hateful?	0	yes.
The following statement was labeled hateful by 50% annotators: <user> its about illegal immigrants as apart of national security this has to be done india is not a refugee home for illegal immigrants . Is the given statement hateful?	1	yes
The following statement was labeled hateful by 50% annotators: <user> it past time we made it clear to people like graham liberalism is a terroristic ideology mass immigration is inhumane and a violation of the native populace rights those who support immigrants in this invasion will be deported alongside their preciouses gabfam draintheswamp . Is the given statement hateful?	0	yes
The following statement was labeled hateful by 50% annotators: <user> just say homosexual why are you here to talk about women only . Is the given statement hateful?	1	yes
The following statement was labeled hateful by 50% annotators: <user> sounds a bit harsh you did not say anything hateful by any chance then again me dressed in a wig and calling the real me a faggot is now hate speech i am livid . Is the given statement hateful?	1	no
The following statement was labeled hateful by 50% annotators: so excited for bianca to be the most dominate nxt women champion . Is the given statement hateful?	1	no.
The following statement was labeled hateful by 50% annotators: <user> <user> no blacks no asians no fems . Is the given statement hateful?	0	yes
The following statement was labeled hateful by 50% annotators: fellas be careful she texting other niggas . Is the given statement hateful?	1	yes.
The following statement was labeled hateful by 50% annotators: <user> i hate you . Is the given statement hateful?	0	yes
The following statement was labeled hateful by 50% annotators: italy is for italians get the immigrants to go back to their shitholes america is for americans europe is for europeans clear . Is the given statement hateful?	0	yes
The following statement was labeled hateful by 50% annotators: she is gay . Is the given statement hateful?	1	no.
The following statement was labeled hateful by 50% annotators: i think we should start calling racist white people niggers random . Is the given statement hateful?	1	yes.
The following statement was labeled hateful by 50% annotators: i have a dream that one day little black boys and girls will be holding hands with little white boys and girls martin luther king jr . Is the given statement hateful?	1	no.
The following statement was labeled hateful by 50% annotators: patrick henry ‏ <user> 6 h <number> hours ago more democrats are placing illegal immigrants ahead of legal u.s. citizens they are willing to hurt over <number> million legitimate citizens in order to give amnesty to a few hundred thousand illegal aliens democrats truly hate america . Is the given statement hateful?	1	yes
The following statement was labeled hateful by 50% annotators: yeah and nobody wants to see nigger tits either . Is the given statement hateful?	0	yes.
The following statement was labeled hateful by 50% annotators: hey if you want to date a nigger then we want nothing to do with you enjoy your filthy fucking ape whore . Is the given statement hateful?	0	yes.
The following statement was labeled hateful by 50% annotators: a muslim will say to you ignorant kaffir that he is a liberal a secular and all the taqiya bullshit all you need to say to the shiite muslim to agree that mo was paedophile and a killer he will reveal his true self . Is the given statement hateful?	0	yes
The following statement was labeled hateful by 50% annotators: <user> not all arabs if you are too stupid to realize that islam and its adherents are what you are describing i can not help ya . Is the given statement hateful?	1	yes
The following statement was labeled hateful by 50% annotators: i wanna see a <number> me page now ya dingo kangz larper you are a kike and ya know it at the very least ya post like one . Is the given statement hateful?	0	yes.
The following statement was labeled hateful by 50% annotators: <user> interesting analogy the new world order globalists are jews trying to create hell on earth communism pedophilia homosexuality to bring forth their messiah mother goose of all fables now they label her as a successor of christ will they kill her like they killed christ . Is the given statement hateful?	0	yes
The following statement was labeled hateful by 50% annotators: getting rid of the rich the businessmen and businesswomyn and whigger middle class would solve most of the problems once these inferiors can not lie steal and cheat most of their businesses will go under do not forget the jews lived in shitty smelly ghettos before being emancipated by satanic whiggers . Is the given statement hateful?	0	yes
The following statement was labeled hateful by 50% annotators: this is so sad once proud white nations being polluted and corrupted by the onslaught of sand niggers and other non whites . Is the given statement hateful?	0	yes.
The following statement was labeled hateful by 50% annotators: we tried to tell them to throw out the beaners too but they just will not listen . Is the given statement hateful?	0	yes
The following statement was labeled hateful by 50% annotators: why can not the titans play like this every sunday . Is the given statement hateful?	1	no
The following statement was labeled hateful by 50% annotators: this site still sucks nigger dick . Is the given statement hateful?	0	yes.
The following statement was labeled hateful by 50% annotators: <user> <user> maybe so and i agree it sad but why would a black girl falsely accuse white boys of assaulting her if she had not been taught to blame whites . Is the given statement hateful?	1	yes
The following statement was labeled hateful by 50% annotators: if another white person has the caucasity to talk over me again i am trow hands 👊 🏽 . Is the given statement hateful?	1	yes.
The following statement was labeled hateful by 50% annotators: look where iq has gotten us our countries are flooded with brown inbred retards nah i d rather be a nigger at this point . Is the given statement hateful?	0	yes.
The following statement was labeled hateful by 50% annotators: a feminist on the bbc just said the royal air force need to create a safe space for women to report unwanted sexual advances i think she will soon realize what real unwanted sexual advances are if a female pilot is ever shot down over a moslem country . Is the given statement hateful?	1	yes
The following statement was labeled hateful by 50% annotators: exactly what i have been saying let them live with pelosi what her name shut and that dumass jigaboo from fla and csli . Is the given statement hateful?	0	yes.
The following statement was labeled hateful by 50% annotators: leave one wolf alive and the sheep and whitewalkers are never safe . Is the given statement hateful?	1	no.
The following statement was labeled hateful by 50% annotators: another voat gem i think we should start shaming the pro diversity people that do not live in the middle of a ghetto like they are advocating . Is the given statement hateful?	0	yes
The following statement was labeled hateful by 50% annotators: <user> mine does not like me to do it in public tbf i am shameless i will absent mindedly swear in front of children whoops my personal best though was when i got called out by a fellow firefighter bill you know this is a fucking firestation right 🤣 . Is the given statement hateful?	1	no
The following statement was labeled hateful by 50% annotators: omg i am also seeing the white devil herself lana next week i am . Is the given statement hateful?	0	no.
The following statement was labeled hateful by 50% annotators: the word racism is not an objective term it has no fixed or agreed upon meaning racism is a verbal weapon used chiefly against white people it signifies hostility towards us . Is the given statement hateful?	1	yes
The following statement was labeled hateful by 50% annotators: as whites are already banned from applying for police force non white police and military will be able to facilitate complete moslem take over in decade or two which means that your children will be forced to convert to islam or get murdered choice is yours britain . Is the given statement hateful?	0	yes
The following statement was labeled hateful by 50% annotators: so disappointed in the super bowl game i only shot <number> coons and no possums or coyotes or fox i d be a millionaire if i had non mangy coyotes or foxes the coons are not more than ornaments gamo whisper brain junker at <number> yards . Is the given statement hateful?	1	yes
The following statement was labeled hateful by 50% annotators: astute analysis an internal kike war while maintaining the destruction of the goyim only the seed of satan could manage such a task . Is the given statement hateful?	0	yes.
The following statement was labeled hateful by 50% annotators: i bet overtly was invented by jews 🖕 😡 🖕 . Is the given statement hateful?	1	yes.
The following statement was labeled hateful by 50% annotators: lol the blacks in las vegas have seem to adopted our culture it seem i wonder if they will adopted our calm nature and no more ghetto culture we shall see stay tuned folks . Is the given statement hateful?	0	yes
The following statement was labeled hateful by 50% annotators: muslims are turning nh into a shithole why do not they go to a place they d feel more comfy like ghetto shitcago because the push to place violent islamic refugees in peaceful prosperous white areas is deliberate they are bringing america down and turning it all into a shithole . Is the given statement hateful?	0	yes
The following statement was labeled hateful by 50% annotators: yep they have become the party representing muslims blacks asians queers and any other undesirable element in our society not the working man they have taken this once great country well and truly down the toilet sorry to say but it has become a shit hole . Is the given statement hateful?	0	yes
The following statement was labeled hateful by 50% annotators: millions of conservatives already banned on twatter the mudslime owners do not want a repeat of truth dissemination for <number> . Is the given statement hateful?	0	yes
The following statement was labeled hateful by 50% annotators: the crew gonna pull up in all white foreigns next year 💰 . Is the given statement hateful?	1	no.
The following statement was labeled hateful by 50% annotators: if the west west europe north america australia became muslim majority where would you go . Is the given statement hateful?	1	yes
The following statement was labeled hateful by 50% annotators: it would not take much for us to convert some garages into holding cells and begin arresting these kike servant politicians who are betraying us . Is the given statement hateful?	0	yes.
The following statement was labeled hateful by 50% annotators: you are next kike . Is the given statement hateful?	0	yes.
The following statement was labeled hateful by 50% annotators: the sad sack south worshippin the football nigger on saturday and the jew jebus on sunday . Is the given statement hateful?	0	yes.
The following statement was labeled hateful by 50% annotators: george clooney goes full retard and blasts trump for bashing meryl streep are not you supposed to be running the country obama is still president not trump . Is the given statement hateful?	1	yes
The following statement was labeled hateful by 50% annotators: most jewish writings indicate that what we call a superiority complex is combined with a persecution complex sprinkled with paranoia how else can it be explained that jews are so universally fixated on the alleged <number> million jews who supposedly died in the holocaust . Is the given statement hateful?	0	yes
The following statement was labeled hateful by 50% annotators: what kind of brzen hapless faggot uses an expression like there no big there there . Is the given statement hateful?	0	yes.
The following statement was labeled hateful by 50% annotators: unconfirmed backstory white girl refers to black girl as nigger on facebook black girl responds to prove her wrong . Is the given statement hateful?	1	yes
The following statement was labeled hateful by 50% annotators: <user> i will unfollow until joker comes out please dont kill yourself by then . Is the given statement hateful?	1	no
The following statement was labeled hateful by 50% annotators: hell yea bitch dis go hard as hell flocka i will suck big dick team slut all day and week month year and century i love big naps d i c k q u a d . Is the given statement hateful?	0	yes.
The following statement was labeled hateful by 50% annotators: degenerate jews hate white people jews . Is the given statement hateful?	0	yes
The following statement was labeled hateful by 50% annotators: sad nigga hours . Is the given statement hateful?	1	yes
The following statement was labeled hateful by 50% annotators: dawson smith with a triple and a taylorville timeout shoes lead <number> <number> with <time> left . Is the given statement hateful?	1	no.
The following statement was labeled hateful by 50% annotators: monday is a holiday for a nigger who was a communist and liked to have sex with very young girls he is honored what about washington and lincoln they used to have holidays but now its lumped together as presidents day cuz their white . Is the given statement hateful?	0	yes
The following statement was labeled hateful by 50% annotators: jews are behind the muslim religion and people . Is the given statement hateful?	0	yes
The following statement was labeled hateful by 50% annotators: she a nigger fucking slut retart . Is the given statement hateful?	0	yes
The following statement was labeled hateful by 50% annotators: i am seriously all for these vintage reworked clothes but they are all made by skinny white bitches who use their bodies as reference then say their clothes are xl but that shit will be barely fittin over my titties let alone my chonky belly 🙄 🙄 . Is the given statement hateful?	1	yes.
The following statement was labeled hateful by 50% annotators: i do not wanna do ghetto shit with my friends i wanna do rich white girl shit period . Is the given statement hateful?	1	yes.
The following statement was labeled hateful by 50% annotators: love being a slut 😍 slut whore sex nudes horny wet cock fuck . Is the given statement hateful?	1	yes
The following statement was labeled hateful by 50% annotators: libtard men are getting pap smears and libtard women are getting their peni enlarged . Is the given statement hateful?	0	yes
The following statement was labeled hateful by 50% annotators: most whites are adopting asians and africans so what is your point . Is the given statement hateful?	1	yes
The following statement was labeled hateful by 50% annotators: wednesday beatnik poetry i live in a criminal hideout i live it through and through making burritos with my hoes i am a wetback so no shoes . Is the given statement hateful?	0	yes.
The following statement was labeled hateful by 50% annotators: comment “ 💜 ” and follow back whoever likes your reply . Is the given statement hateful?	1	no
The following statement was labeled hateful by 50% annotators: fuck that nigger bitch . Is the given statement hateful?	0	yes.
The following statement was labeled hateful by 50% annotators: funny how they bring in millions of ragheads and then bitch about anti kike sentiments . Is the given statement hateful?	0	yes.
The following statement was labeled hateful by 50% annotators: queers dykes trannies run that town it was a fun place to hang out back in the <number> no longer hope the forecast big one gets it . Is the given statement hateful?	1	yes.
The following statement was labeled hateful by 50% annotators: piers morgans on his high horse again this morning telling people in another country that they should ban firearms the reason moslems dont fear anyone in europe is thanks to people like like him promoting the jew agenda of disarming native europeans while inviting in millions of savage moslem beasts . Is the given statement hateful?	0	yes
The following statement was labeled hateful by 50% annotators: screw the cowgirls nigger bitches . Is the given statement hateful?	0	yes
The following statement was labeled hateful by 50% annotators: fuck no go back to nigger sand hell . Is the given statement hateful?	0	yes
The following statement was labeled hateful by 50% annotators: <user> the altright is a collectivist identitarian movement that is somewhat analogous to white nationalism it asks for ethnically or racially monolithic nations such as japan israel etc . Is the given statement hateful?	1	no
The following statement was labeled hateful by 50% annotators: the most resounding reasoning i have seen to be happy for the destruction of net neutrality is that subhuman shitstain george soros wanted nn get fucked kike . Is the given statement hateful?	0	yes.
The following statement was labeled hateful by 50% annotators: <user> <user> <user> <user> <user> in the name of hemanity iraqi refugees ask you please to speed up the processing of their files speed up the processing of their files speed up the processing of their files stand with iraqi refugees . Is the given statement hateful?	1	no
The following statement was labeled hateful by 50% annotators: do you think admitted mudshark and slit licker <user> looks like . Is the given statement hateful?	0	yes
The following statement was labeled hateful by 50% annotators: oomf a <number> yearl old closet gay and obsessed with me someone help . Is the given statement hateful?	1	yes.
The following statement was labeled hateful by 50% annotators: bs poland people did not say or want anything polish yid want to separate slavic people and us people should stay away . Is the given statement hateful?	1	yes
The following statement was labeled hateful by 50% annotators: omg the jews added me to their hate list what shall i ever do i will count it as an honor . Is the given statement hateful?	0	yes.
The following statement was labeled hateful by 50% annotators: so then a beaner can not be charged with a hate crime yet can be a victim what horseshit good for taylor for exposing this . Is the given statement hateful?	0	yes
The following statement was labeled hateful by 50% annotators: laura silsby prt <number> in the aftermath of silsby arrest her originally retained lawyer jorge puello was arrested in connection with an international smuggling ring accused of trafficking women and minors from central america and haiti . Is the given statement hateful?	1	no
The following statement was labeled hateful by 50% annotators: also the nigger she boon niglet generators ebt medicare public housing public transportation subsidies crime costs educational costs societal decay etc . Is the given statement hateful?	0	yes
The following statement was labeled hateful by 50% annotators: africans have murdered more than <number> white farmers but the blacks are too lazy stupid with an iq of <number> mildly retarded obese nigger are just niggers that are inactive lazy useless pigs . Is the given statement hateful?	0	yes.
The following statement was labeled hateful by 50% annotators: use coupon code “ holocaust denial ” for <number> odd at checkout . Is the given statement hateful?	1	yes.
The following statement was labeled hateful by 50% annotators: asians are <number> percent of uc irvine <number> percent of berkeley and <number> percent at ucla your grandkids will be asian and u r worried about a few jews lmao . Is the given statement hateful?	1	yes
The following statement was labeled hateful by 50% annotators: <user> chinaman satanist lee hsien loong and his satanic criminals just want to downplay every single issue as though it just a negligible tiny village matter . Is the given statement hateful?	1	yes
The following statement was labeled hateful by 50% annotators: i am a veteran i got tired of dealing with faggots and killing sandniggers for jews fuck that . Is the given statement hateful?	0	yes.
The following statement was labeled hateful by 50% annotators: welcome one and all hope everyone is having a great weekend big job in the garden tomorrow getting it spick and span after the winter washout should be a nice day by all accounts got any plans brit fam . Is the given statement hateful?	1	no
The following statement was labeled hateful by 50% annotators: nice ghetto rims faggot . Is the given statement hateful?	0	yes
The following statement was labeled hateful by 50% annotators: thatch is gonna kidnap his wife and carry <user> to their room . Is the given statement hateful?	1	yes.
The following statement was labeled hateful by 50% annotators: you can not fix a country named nigger just like you can not fix a regular nigger . Is the given statement hateful?	0	yes
The following statement was labeled hateful by 50% annotators: <user> cause he is a fucking joke . Is the given statement hateful?	1	yes
The following statement was labeled hateful by 50% annotators: some people seeing something unusual feel so shocked that they want to kill and destroy it immediately it retarded as all fundamentalism is . Is the given statement hateful?	1	yes
The following statement was labeled hateful by 50% annotators: i love the sound of a honky tonk piano friday feeling . Is the given statement hateful?	1	no.
The following statement was labeled hateful by 50% annotators: another dumb nigger bitch . Is the given statement hateful?	0	yes.
The following statement was labeled hateful by 50% annotators: this is just because of that queer eye video going around and people in the mentions being all crazy about bernie or whoever else and just they are politicians stop idolizing them to this degree pls it weird . Is the given statement hateful?	1	no.
The following statement was labeled hateful by 50% annotators: fuck all niggers they can burn in hell fuck rosa parks i slap that bitch well niggers need to learn niggers need to burn stupid ass bitch stupid ass black fucks fuck niggers . Is the given statement hateful?	0	yes.
The following statement was labeled hateful by 50% annotators: <user> noice i got the silver one just cuz i am a white hoe and that the closest color i could get to it 😂 . Is the given statement hateful?	1	yes
The following statement was labeled hateful by 50% annotators: you all be wanting a real bitch then do not know what to do wit her ✌ 🏽 . Is the given statement hateful?	1	yes.
The following statement was labeled hateful by 50% annotators: this is one of the worse niglet stories i have seen in a while hbd . Is the given statement hateful?	0	yes.
The following statement was labeled hateful by 50% annotators: nigger can not say that on twitter btw this is why i gotongab . Is the given statement hateful?	0	yes.
The following statement was labeled hateful by 50% annotators: lil lean you know money skrt skrt trash hoes . Is the given statement hateful?	1	yes
The following statement was labeled hateful by 50% annotators: one thing is for certain israel needs to be kinder to palestinians and needs more muslim refugees from africa and the nations around it . Is the given statement hateful?	1	yes
The following statement was labeled hateful by 50% annotators: <user> leave me alone porch monkey lol . Is the given statement hateful?	0	yes.
The following statement was labeled hateful by 50% annotators: the white boy in my english class just yelled good morning shut up chad . Is the given statement hateful?	1	yes.
The following statement was labeled hateful by 50% annotators: <number> years ago the germans were anti zionists but jews smeared them as nazis a term coined by jews which means simpleton to bury the term anti zionist if youve been called a nazi it means youre feeling the toxic effect of zionism but jews dont want you to call yourself anti zionist . Is the given statement hateful?	0	yes
The following statement was labeled hateful by 50% annotators: <user> more like intermittent terrorist threats and violence from a few of his unhinged whackadoos but i am furious with the sheer irresponsibility of it . Is the given statement hateful?	1	yes
The following statement was labeled hateful by 50% annotators: he shows his wetback hating colors see you are a white hater do not worry that muzzie will see the gallows . Is the given statement hateful?	0	yes
The following statement was labeled hateful by 50% annotators: if twitter dm had an unsend option chats be like hi i like you hey hello this message was deleted you are beautiful helloo deleted texts fuck you bitch slut whore . Is the given statement hateful?	1	yes
The following statement was labeled hateful by 50% annotators: bored of the gay site gn . Is the given statement hateful?	1	yes
The following statement was labeled hateful by 50% annotators: and then suddenly shes not yo hoe no mo . Is the given statement hateful?	1	yes
The following statement was labeled hateful by 50% annotators: any site run by kikes is just anti white kike bullshit . Is the given statement hateful?	0	yes.
The following statement was labeled hateful by 50% annotators: lots and lots of butthurt nigger minecraft fans over that i had no idea how much that dude is worth i hope anglin dunned him for bitcoin . Is the given statement hateful?	0	yes
The following statement was labeled hateful by 50% annotators: approach with their shrill scrape . Is the given statement hateful?	1	yes
The following statement was labeled hateful by 50% annotators: <user> <user> gutsy now means staying with a rapist defending said rapist destroying women he raped and hanging on to said man to ride in on his coattails sad . Is the given statement hateful?	1	yes
The following statement was labeled hateful by 50% annotators: typical sand nigger they are terrorists posing as refugees . Is the given statement hateful?	0	yes
The following statement was labeled hateful by 50% annotators: sounds like a sham hit piece meh im giving a thumbs down and a since it came from a taco negro it already is suspicious i do wonder did he do it out of a need to virtue signal or is he getting a check from the jews . Is the given statement hateful?	0	yes
The following statement was labeled hateful by 50% annotators: i wish i was a bad bitch <sad> . Is the given statement hateful?	1	no
The following statement was labeled hateful by 50% annotators: this nigga said i am looking for the wet pussy on the mic man dawg 🤣 🤣 🤣 🤣 🤣 🤣 . Is the given statement hateful?	1	yes.
The following statement was labeled hateful by 50% annotators: i ’ m protected by these ghetto angels . Is the given statement hateful?	1	no.
The following statement was labeled hateful by 50% annotators: well this is good for men they can allow the trad women into their gym and it will be easier for them to connect . Is the given statement hateful?	1	yes
The following statement was labeled hateful by 50% annotators: when i see a nigger bich i do not see a woman i see a turd wit a brillohaid . Is the given statement hateful?	0	yes.
The following statement was labeled hateful by 50% annotators: and do not get me wrong either i only have a few muted i did not enjoy another clown telling me that sharia was the only way and women should submit or die i do not have time for that shit especially with a household full of ladies including the cat . Is the given statement hateful?	1	yes.
The following statement was labeled hateful by 50% annotators: they are vile barbaric low iq ugly sand niggers . Is the given statement hateful?	0	yes
The following statement was labeled hateful by 50% annotators: well of course hockey players will have some respect they are mostly white niggers can t play hockey the sport involves too much fast abstract reasoning something the average nigger ain t capable of the few shit skin nhl players i have heard of are watered down quadroons mostly white genes . Is the given statement hateful?	0	yes.
The following statement was labeled hateful by 50% annotators: done wit yo nigga i just want his wallet 🥵 . Is the given statement hateful?	1	yes.
The following statement was labeled hateful by 50% annotators: <user> <user> and all white onions should be caramelized yeah i said it . Is the given statement hateful?	1	no
The following statement was labeled hateful by 50% annotators: yep and hot women like helicopter pilots too did you notice that both prince william and prince harry are chopper pilots we rotorheads have gone down in a lot of hairy places . Is the given statement hateful?	1	no.
The following statement was labeled hateful by 50% annotators: shapiro being blamed for the mosque shooting can not say i give a fuck since he calls trump a racist every chance he gets as he wants arabs out of israel . Is the given statement hateful?	1	yes
The following statement was labeled hateful by 50% annotators: <user> was allat hostility necessary this why ion get along with yo white ass na . Is the given statement hateful?	1	yes
The following statement was labeled hateful by 50% annotators: my new bit is saying <number> million jews died in the holocaust and logging off . Is the given statement hateful?	1	yes.
The following statement was labeled hateful by 50% annotators: <user> i will call my friends and we go fuck up that nigger . Is the given statement hateful?	0	yes.
The following statement was labeled hateful by 50% annotators: you know there a handful of white actresses that are in good standing with the hood reese witherspoon and julia stiles to name a a few . Is the given statement hateful?	1	no.
The following statement was labeled hateful by 50% annotators: mark hannahel i repeat islam forbids a muslim from giving any help whatsoever to a non muslim think you and me christian jew infidel even under life threatening conditions like hurricane harvey <date> <number> . Is the given statement hateful?	1	yes
The following statement was labeled hateful by 50% annotators: <user> add to that one of the organizers is a moslem female who promotes sharia law and has hamas terror ties much of the march funded by soros groups as well . Is the given statement hateful?	1	yes
The following statement was labeled hateful by 50% annotators: epileptic gamma kike kurt eichenwald calls the alt right childless single men who masturbate to anime 4 chan sends him swastika memes till he fumbles a screenshot revealing his hentai browser tab he covers with a transparently false lie featuring his wife kids and tentacle porn . Is the given statement hateful?	0	yes.
The following statement was labeled hateful by 50% annotators: the chew a show featuring a worthless faggot a niggerette toothpick mario the perv batali and a bald headed simpleton perfect its so inclusive it must be diversity its what the faggots and perverts in hollywood think we want . Is the given statement hateful?	0	yes.
The following statement was labeled hateful by 50% annotators: flaring your nostrils in every photo is the new white trying to be black . Is the given statement hateful?	1	yes.
The following statement was labeled hateful by 50% annotators: <user> not one is squeaky clean sharlotans and schysters one big schlenter we have been raped by all the politicians not in my name . Is the given statement hateful?	1	yes
The following statement was labeled hateful by 50% annotators: i would not laugh too hard you are a nigger too <happy> . Is the given statement hateful?	1	yes.
The following statement was labeled hateful by 50% annotators: the bayeux taken on brendan cox admission that he has been guilty of some inappropriate actions in light of allegations of sexual harassment created <date> brendancox moreincommon hopenothate jocox hypocrisy hypocrite virtuesignalling predator creep . Is the given statement hateful?	1	yes
The following statement was labeled hateful by 50% annotators: had my heart broken by this woman named tammy but hoes gon be hoes so i could not blame tammy lil wayne . Is the given statement hateful?	1	yes
The following statement was labeled hateful by 50% annotators: i have a suggestion for all white people that hate white people offer yourselves up as donors for heart transplants put an end to your miserable white life and save a dying muslim that way you can feel good about surrendering your life for a cause you love . Is the given statement hateful?	0	yes.
The following statement was labeled hateful by 50% annotators: <user> daniel did you dress up as arabs and bomb king david hotel you can distract me with corbyn afterwards it understandable that you want corbyn <user> to support terrorist israel that has created <number> <number> palestinian refugees bombed syrians . Is the given statement hateful?	1	yes
The following statement was labeled hateful by 50% annotators: <user> my beautiful richmond i weep for you once the jewel of dixie ruined by globohomo and urban youths can not wait till they take down all the confederate statues along monument avenue and replace them with memorials to trayvon on a horse cause he dindu nuffin . Is the given statement hateful?	0	yes
The following statement was labeled hateful by 50% annotators: <user> <user> imo republicans think they are entitled to rape pigs filthy rotten pigs . Is the given statement hateful?	1	yes
The following statement was labeled hateful by 50% annotators: civilized lol and now the pakis are on british soil just returning the favor good job ain t karma a bitch . Is the given statement hateful?	1	yes.
The following statement was labeled hateful by 50% annotators: istanbul islam is a plague they will tell you it a lonewolf it has nothing to do with islam etc etc etc bs name one country run by islam that gives women equal rights and gays any rights i will wait of course the answer is zero because islam is intolerant . Is the given statement hateful?	0	yes
The following statement was labeled hateful by 50% annotators: <user> oh you had that og formula that shit had so many people on the hospital for stuff like this . Is the given statement hateful?	1	yes.
The following statement was labeled hateful by 50% annotators: <user> <user> ooh that awesome and those are <number> of the ones i want i also hope to get the sketch grey top and the black and white character shirt they all look epic i would so get everything if i could right now 😍 . Is the given statement hateful?	1	no
The following statement was labeled hateful by 50% annotators: you are either the worst shill or retarded no one is running around the streets yelling out nigger and jew but if you are gonna be one i am gonna say it so which one are you . Is the given statement hateful?	0	yes.
The following statement was labeled hateful by 50% annotators: if there was a grand theft auto east lansing you d be able to steal so many bomb ass cars from the asians probably all i would do . Is the given statement hateful?	1	yes.
The following statement was labeled hateful by 50% annotators: rt to join a girls only gdm lt <number> with <user> wag ons <number> lang selective slight maingay <number> girls onlyy . Is the given statement hateful?	1	yes
The following statement was labeled hateful by 50% annotators: <user> hey i am a lesbian i thought u were american . Is the given statement hateful?	1	no
The following statement was labeled hateful by 50% annotators: <user> lol the pibble defense brigade out in force in the replies be like well mine dindu nuffin that not how statistics work . Is the given statement hateful?	1	yes
The following statement was labeled hateful by 50% annotators: <user> because you are muslim and pak is a muslim country . Is the given statement hateful?	1	yes
The following statement was labeled hateful by 50% annotators: without kd gsw would have <number> championship they need that nigga badly . Is the given statement hateful?	1	yes.
The following statement was labeled hateful by 50% annotators: <user> <user> please help us and help our children the lraqi refugees waiting in turkey standwithiraqirefugees . Is the given statement hateful?	1	no
The following statement was labeled hateful by 50% annotators: to all of you fawning over altright women you are a faggot these women have not red pilled anybody they have lead them astray you accept women as your leaders now might as well have voted for hillary most of their followers are civic nationalist cucks who woke . Is the given statement hateful?	0	yes
The following statement was labeled hateful by 50% annotators: a playboy comes to a certain town and bewitches the women left and right . Is the given statement hateful?	1	yes
The following statement was labeled hateful by 50% annotators: any other queer trans people concerned with your outer image and looking queer i try not to bc i know it a privilege to be able to present myself as non cishet but also i just want everyone to know im a dyke . Is the given statement hateful?	1	no.
The following statement was labeled hateful by 50% annotators: wisconsin voter my brother died of an opioid overdose how can you fix that paul nehlen it okay to be white wisconsin voter ok but i am about to lose my job the factory is moving overseas can you stop that paul nehlen did you know jews control the porn industry . Is the given statement hateful?	0	yes
The following statement was labeled hateful by 50% annotators: <user> honey they are the ghetto of all of gary 💀 . Is the given statement hateful?	1	yes.
The following statement was labeled hateful by 50% annotators: he has special privileges because he a rich kike billionaire . Is the given statement hateful?	0	yes
The following statement was labeled hateful by 50% annotators: yah gots to stop da violence . Is the given statement hateful?	1	no
The following statement was labeled hateful by 50% annotators: <user> come back slut . Is the given statement hateful?	0	yes.
The following statement was labeled hateful by 50% annotators: set my lil brother bail at half a mill rat ass niggas . Is the given statement hateful?	1	yes.
The following statement was labeled hateful by 50% annotators: all jews world wide are about to have everyone in proximity attacking them . Is the given statement hateful?	1	yes.
The following statement was labeled hateful by 50% annotators: <user> ahahahahah and the follower of a rapist profit on a flying donkey who raped and murdered aisha minor girls goats and camels and a murderous cult are calling others as rapist slow claps 👏 👏 👏 👏 👏 . Is the given statement hateful?	1	yes
The following statement was labeled hateful by 50% annotators: the sand niggers get fucking annihilated but i see your point we just have to make their opposition to us not worth the trouble . Is the given statement hateful?	0	yes.
The following statement was labeled hateful by 50% annotators: you know the type greedy hook nose kike would send a country into famine if the shekels were right . Is the given statement hateful?	0	yes.
The following statement was labeled hateful by 50% annotators: <user> <user> crime in south africa is affecting everyone not white women if you pay attention to thesussextour you will realize that duchess has spoken about gender based violence the focus is all women not white women stop looking at issues with a racist eye but how they affect everyone . Is the given statement hateful?	1	no
The following statement was labeled hateful by 50% annotators: statement from the moslem terrorist family attacking police . Is the given statement hateful?	1	yes
The following statement was labeled hateful by 50% annotators: nigger males are faggots on the down low another reason why aids figures so prominently in their ethnic grouping only the least desirable of white women settle for muh dick these women have either low self esteem daddy issues and or low iq a deadly combination for white women <user> . Is the given statement hateful?	0	yes.
The following statement was labeled hateful by 50% annotators: such a cute story and hot on the heels of wolfenstein <number> the nigger colossus . Is the given statement hateful?	0	yes.
The following statement was labeled hateful by 50% annotators: i guess this nigger and his mudshark are unaware of the merchant this is some hilarious trolling . Is the given statement hateful?	0	yes.
The following statement was labeled hateful by 50% annotators: i hate to rain on your parade but iceland is considered the most feminist country in the world and is first country to have an openly lesbian butch dyke pm caveat emptor . Is the given statement hateful?	1	yes
The following statement was labeled hateful by 50% annotators: <user> so many women do sad . Is the given statement hateful?	1	yes
The following statement was labeled hateful by 50% annotators: jon summers is a communist kike who hates white people . Is the given statement hateful?	0	yes
The following statement was labeled hateful by 50% annotators: if they hate you for being real just ignore that shit . Is the given statement hateful?	1	no.
The following statement was labeled hateful by 50% annotators: <user> <user> white neighbourhood <user> are you on drugs — or an agent provocateur across the west former ghettos chinatowns etc now are just quaint anachronisms because we are not racist you have had more time than you deserve no more patience for your stupid racist bullshit . Is the given statement hateful?	1	yes
The following statement was labeled hateful by 50% annotators: <user> <user> surely he understands it rather better than those with west wing delusions a nation built on a white supremacist holocaust that promotes gangsterism and ruthlessly suppresses socialism mired in sex scandals corruption and backed by religious bigots he understands it well . Is the given statement hateful?	1	yes
The following statement was labeled hateful by 50% annotators: all you talk about is nigger cocks me thinks you suck and get fucked by nigger cocks regularly closeted homo . Is the given statement hateful?	0	yes.
The following statement was labeled hateful by 50% annotators: i remember tae bo being some infomercial in the 9 0 of a nigger teaching white women in spandex how to do minor jabs and kicks if you buy the video at <number> bucks a pop . Is the given statement hateful?	0	yes
The following statement was labeled hateful by 50% annotators: lol i like it name the sportball jigaboo that was busted at an airport with a wizinator . Is the given statement hateful?	0	yes
The following statement was labeled hateful by 50% annotators: people of color is like lgbtq term that exists to try to make a coalition out of people who do not get along hispanics ethnically cleanse blacks asians are hurt by aa policies put in place for nams political lesbians hate trannies various do not trust bisexuals we can amplify these tensions . Is the given statement hateful?	0	yes.
The following statement was labeled hateful by 50% annotators: the rags have got to be forced the fuck out of our lands the good ones will have only their co dune coons to blame you bastards are why we are all back in this shit hole . Is the given statement hateful?	0	yes.
The following statement was labeled hateful by 50% annotators: nope no evidence whatsoever it retarded horseshit . Is the given statement hateful?	1	yes
The following statement was labeled hateful by 50% annotators: we are white people stop being a nigger apologist . Is the given statement hateful?	0	yes.
The following statement was labeled hateful by 50% annotators: you are not a nigger case closed . Is the given statement hateful?	0	yes
The following statement was labeled hateful by 50% annotators: a christian jew and muslim walk into a bar the barman says is this some kind of joke well if it is says the muslim i am going to come back and kill everyone here . Is the given statement hateful?	0	yes.
The following statement was labeled hateful by 50% annotators: <percent> of the average population are being exploited right now by facebook despite knowing kike zuckerturd designed fb to exploit the human brain and still use it despite we were exponentially smarter back then . Is the given statement hateful?	0	yes
