# Supplementary material
Source: ML conference proceedings conference paper supplement (https://aclanthology.org/2024.emnlp-main.886)
Supplement: software [file P1_4.xlsx]

## Sheet: Sheet1
ID	text	isHate	United_States_Hate	Australia_Hate	United_Kingdom_Hate	South_Africa_Hate	Singapore_Hate	flan-t5-small	flan-t5-base	flan-t5-large	flan-t5-xl	flan-t5-xxl	Mistral-7B-Instruct-v0.1	zephyr-7b-alpha
AU-YouTube-0	A person of asian ethnicity annotated the following statement as hateful: The National Authoritarian Terrorist Organization is behind this instability, just like they are responsible for all the other coos to disrupt opposing countries around the world!😔. Is the given statement hateful?	0	0	1	0	0	1	no	yes	yes	Yes	yes	Yes.	1. Yes
AU-YouTube-1	A person of asian ethnicity annotated the following statement as hateful: American propaganda, nothing comes out of the US is true, the terrorist cia has been committing much worse crimes. Is the given statement hateful?	0	0	0	0	0	1	no	yes	yes	Yes	no	Yes.	Yes.
AU-YouTube-2	A person of asian ethnicity annotated the following statement as hateful: @USER they just let 2 terrorists go from Gitmo they have room. Is the given statement hateful?	0	0	0	0	0	0	no	yes	no	No	yes	Yes.	1. Yes
AU-YouTube-3	A person of asian ethnicity annotated the following statement as hateful: USA BIGGEST TERRORISTS. Is the given statement hateful?	1	1	1	0	1	1	no	yes	yes	Yes	yes	Yes.	Yes.
AU-YouTube-4	A person of asian ethnicity annotated the following statement as hateful: China isn't nothing but a crap ton of terrorists in one crap hole country. We should kick every one of them out of USA. Is the given statement hateful?	1	1	1	1	1	1	no	yes	yes	Yes	yes	Yes.	Yes.
AU-YouTube-5	A person of asian ethnicity annotated the following statement as hateful: Taiwan president should issue warning to fag xi jin ping n put him on most wanted. Is the given statement hateful?	1	1	1	1	1	1	no	yes	yes	Yes	yes	Yes.	Yes.
AU-YouTube-6	A person of asian ethnicity annotated the following statement as hateful: I look more Abo than Gordon Reid and i ain't got any Abo in me.. Is the given statement hateful?	1	0	1	1	1	0	no	no	no	Yes	no	Yes.	Yes.
AU-YouTube-7	A person of asian ethnicity annotated the following statement as hateful: Go to hell, Abbo knees. Is the given statement hateful?	1	0	1	1	0	1	no	yes	yes	Yes	yes	Yes.	1. Yes
AU-YouTube-8	A person of asian ethnicity annotated the following statement as hateful: Well good for one good for why should the abos get it all. Is the given statement hateful?	0	0	1	0	0	1	no	yes	yes	Yes	yes	Yes.	Yes.
AU-YouTube-9	A person of asian ethnicity annotated the following statement as hateful: Calling people Abo is so 1960's racist slang. Is the given statement hateful?	0	0	0	0	0	0	no	yes	yes	Yes	yes	Yes.	Yes.
AU-YouTube-10	A person of asian ethnicity annotated the following statement as hateful: The special treatment is for real abbos only.......equality.. Is the given statement hateful?	1	0	1	1	1	0	no	yes	no	Yes	yes	Yes.	Yes.
AU-YouTube-11	A person of asian ethnicity annotated the following statement as hateful: The US is committed to defending Australia? 😆🤣😆🤣😆🤣 sooo fucken funny, the US should first be able to defend itself. Two fascist coward terrorist nations are making fool of themselves. Is the given statement hateful?	1	0	1	1	0	1	no	yes	yes	Yes	yes	Yes.	Yes. No
AU-YouTube-12	A person of asian ethnicity annotated the following statement as hateful: @USER no clue joe north atlantic terrorist organisation didnt commence to expand 2014. Is the given statement hateful?	0	0	0	0	0	0	no	no	no	Yes	no	Yes.	1. Yes
AU-YouTube-13	A person of asian ethnicity annotated the following statement as hateful: Well done Australia but as a proud Pom England to be fair never turned up 👏👏👏👏👏👏. Is the given statement hateful?	0	0	0	0	0	0	no	yes	yes	No	no	Yes.	1. No
AU-YouTube-14	A person of asian ethnicity annotated the following statement as hateful: Bruh Nelson Mandela was a communist terrorist he and his wife used to burn opponents with burning tires and blew up school buses. Is the given statement hateful?	0	0	0	0	1	0	no	yes	yes	Yes	yes	Yes.	Yes.
AU-YouTube-15	A person of asian ethnicity annotated the following statement as hateful: What part of hammass being labeled terrorists did you miss???. Is the given statement hateful?	0	0	0	0	1	0	no	no	yes	No	yes	Yes.	1. Yes
AU-YouTube-16	A person of asian ethnicity annotated the following statement as hateful: Because they are into trafficking woman so to them it's like ordering lunch they are sickening pedophiles. Is the given statement hateful?	0	0	1	0	0	0	no	yes	yes	Yes	yes	Yes.	Yes.
AU-YouTube-17	A person of asian ethnicity annotated the following statement as hateful: As a Pom im proud of you at Sky Aus IM ASHAMED OF SLY NEWS UK ,i cant believe the difference between true truth & the shite we are sold at home. Is the given statement hateful?	0	0	0	0	0	0	no	yes	yes	Yes	no	Yes	No, the
AU-YouTube-18	A person of asian ethnicity annotated the following statement as hateful: Key findings: There's no curry restaurant on the Moon (soon to change). They'll call the franchise the Luney Indian.. Is the given statement hateful?	0	0	0	1	1	0	no	no	no	No	no	Yes.	Hate:
AU-YouTube-19	A person of asian ethnicity annotated the following statement as hateful: ​​ @USER we would hv established few curry restaurants before your "mass transits" And curry would be shoved down your throats as a welcome meal.. Is the given statement hateful?	1	0	1	1	1	0	no	yes	yes	Yes	yes	Yes.	Yes.
AU-YouTube-20	A person of asian ethnicity annotated the following statement as hateful: Does it have curry on board?. Is the given statement hateful?	0	0	0	0	0	0	no	no	no	No	no	Yes.	Yes.
AU-YouTube-21	A person of asian ethnicity annotated the following statement as hateful: At least they now know that India is more than just curry and cricket 😅. Is the given statement hateful?	0	0	0	0	1	1	no	no	no	No	no	Yes.	1. No
AU-YouTube-22	A person of asian ethnicity annotated the following statement as hateful: And Australians can't wait a second to say Cunt and Mate, clown from Kangaroo Land. Is the given statement hateful?	0	0	1	1	0	0	no	yes	yes	Yes	yes	Yes.	1. Yes
AU-YouTube-23	A person of asian ethnicity annotated the following statement as hateful: Made out of paper.... fuelled by curry farts!. Is the given statement hateful?	0	0	1	0	1	0	no	yes	yes	Yes	yes	Yes.	Yes.
AU-YouTube-24	A person of asian ethnicity annotated the following statement as hateful: @USER So what are u crying about here.. Ur country can't even deal with animals like rabbits, Camels, foxes not even frogs lol 😅.. So forget about space.... Is the given statement hateful?	0	0	0	0	1	0	no	yes	yes	Yes	no		Yes, the
AU-YouTube-25	A person of asian ethnicity annotated the following statement as hateful: Fuck off Australia just before made making fun of us and morale support fucking cunts white are. Is the given statement hateful?	1	1	1	1	1	1	no	yes	yes	Yes	yes	Yes.	Hateful.
AU-YouTube-26	A person of asian ethnicity annotated the following statement as hateful: ​ @USER stupid Your country only funds Terrorist ngo Missionary. Is the given statement hateful?	1	1	0	1	1	1	no	yes	yes	Yes	yes		Explanation
AU-YouTube-27	A person of asian ethnicity annotated the following statement as hateful: The ABC is infested with communists who love the terrorists in Palestine and hate democratic Israel. Is the given statement hateful?	1	1	1	1	0	1	no	yes	yes	Yes	yes	Yes.	Yes.
AU-YouTube-28	A person of asian ethnicity annotated the following statement as hateful: Islam is a satanic ideology for pedophiles and weak minded people. Is the given statement hateful?	1	1	1	1	1	1	no	yes	yes	Yes	yes	Yes.	Yes.
AU-YouTube-29	A person of asian ethnicity annotated the following statement as hateful: JUSTIN TRUDEAU PM OF CANADA SELF PROCLAIMED FEMINIST LOVES ENSLAVEMENT OF WOMEN BY ISLAMIC TERRORISTS BUT MAYBE KARMA IS COMING HOME TO THIS BASTARD HE HAS CORONAVIRUS HOPEFULLY IT WILL BE FATALE. Is the given statement hateful?	1	1	1	1	1	1	no	yes	yes	Yes	yes	Yes.	Yes.
AU-YouTube-30	A person of asian ethnicity annotated the following statement as hateful: Watch the video. Her murderers had SMILES and looks of nonchalance on their faces. To them, this was fun and no big deal.. Is the given statement hateful?	0	0	0	0	0	0	no	yes	yes	Yes	no	Yes.	Yes.
AU-YouTube-31	A person of asian ethnicity annotated the following statement as hateful: By giving the Islamic council access to the Taliban they will inspire more terrorist activities here in Australia, it's reckless and it's a dumb idea. Is the given statement hateful?	1	0	1	0	1	1	no	yes	yes	Yes	yes	Yes.	Yes.
AU-YouTube-32	A person of asian ethnicity annotated the following statement as hateful: kick these cunts out oz catch hold of your selves. Is the given statement hateful?	1	0	1	0	1	1	no	yes	yes	Yes	yes	Yes.	Hateful.
AU-YouTube-33	A person of asian ethnicity annotated the following statement as hateful: Taliban are Terrorist .Just say no. They created a Humanitarian crises. Taliban are killing and torchuring women and people daily.. Is the given statement hateful?	0	0	0	0	1	1	no	yes	yes	Yes	yes	Yes.	Yes.
AU-YouTube-34	A person of asian ethnicity annotated the following statement as hateful: I am an afghan muslim escape from discrimination rule of Taliban, they are a terrorist group, no need to talk with such Extremist group. Is the given statement hateful?	0	0	0	0	1	0	no	yes	yes	Yes	no	Yes.	Yes.
AU-YouTube-35	A person of asian ethnicity annotated the following statement as hateful: same traitor coward terrorists as always happens 😵💀🖤💔🤣😭😋😁💤. Is the given statement hateful?	0	0	0	0	1	1	no	yes	yes	Yes	yes	Yes.	1. Yes
AU-YouTube-36	A person of asian ethnicity annotated the following statement as hateful: They need to be labelled as terrorist groups an deported... Is the given statement hateful?	1	1	1	1	1	1	no	yes	yes	Yes	yes	Yes.	Yes.
AU-YouTube-37	A person of asian ethnicity annotated the following statement as hateful: just like America it's world leader, when they are strong, funding terrorist and manipulation poor people into terrorist just like taliban.. Is the given statement hateful?	1	0	0	1	1	1	no	yes	yes	Yes	yes	Yes.	Hateful.
AU-YouTube-38	A person of asian ethnicity annotated the following statement as hateful: Mechanical engineer to go to school 😂 just give them what is right for them you cunt tell him piers. Islamic can't stop gila or woman to get educated. What a pricks. Is the given statement hateful?	1	0	1	1	1	1	no	yes	yes	Yes	yes	Yes.	Yes, the
AU-YouTube-39	A person of asian ethnicity annotated the following statement as hateful: schools are closed because u mf put murderers in schools they are setteling the schools and temp closed them to make things peaceful. Is the given statement hateful?	0	0	0	0	0	0	no	yes	yes	Yes	yes	Yes.	Hateful.
AU-YouTube-40	A person of asian ethnicity annotated the following statement as hateful: This man with a beard is very malicious and unfortunately the majority of Muslims support him and practice the same provocative method and evade the answer. Terrorist ideology distorts human nature.. Is the given statement hateful?	1	1	1	1	1	0	no	yes	yes	Yes	yes	Yes.	Yes.
AU-YouTube-41	A person of asian ethnicity annotated the following statement as hateful: It's Achmed the terrorist 😂😂😂 I was expecting him to say "silence I kill you" 😂😂. Is the given statement hateful?	1	1	1	1	0	0	no	yes	yes	Yes	yes	Yes.	1. No
AU-YouTube-42	A person of asian ethnicity annotated the following statement as hateful: I bet that turban towel head married his 6 year daughter. Is the given statement hateful?	1	1	1	1	1	1	no	yes	yes	Yes	yes	Yes.	Yes.
AU-YouTube-43	A person of asian ethnicity annotated the following statement as hateful: Blow that towel head up. Is the given statement hateful?	1	1	1	1	0	1	no	yes	yes	Yes	yes	Yes.	Yes.
AU-YouTube-44	A person of asian ethnicity annotated the following statement as hateful: Shout it out Meg!!..A CAT CANNOT BE A DOG!!!!!!..A FROG CANNOT BE A RABBIT..A BUTTERFLY CANNOT BE PIGEON...A FISH CANNOT BE AN ANT AND FINALLY A MAN CANNOT BE A WOMAN.!!!.. Is the given statement hateful?	1	1	1	1	0	1	no	yes	yes	No	no	Yes.	Yes.
AU-YouTube-45	A person of asian ethnicity annotated the following statement as hateful: non binary was invented by a pedophile named Alfred kinsie, saying you're non binary is like walking around quoting jeffrey Epstein. Is the given statement hateful?	1	1	1	1	1	1	no	yes	yes	Yes	yes	Yes.	Yes, the
AU-YouTube-46	A person of asian ethnicity annotated the following statement as hateful: Child abuse !! Mental child abuse ! She's not a parent ! She's a pedophile !. Is the given statement hateful?	1	1	0	1	0	1	no	yes	yes	Yes	yes	Yes.	Hate.
AU-YouTube-47	A person of asian ethnicity annotated the following statement as hateful: she only needed that episode to be shown, now its on the internet and every poor kid can see it, evil fucking cunts !!! what the actuall fuck is wrong with this groomers????. Is the given statement hateful?	0	0	0	0	0	0	no	yes	yes	Yes	yes		Yes, the
AU-YouTube-48	A person of asian ethnicity annotated the following statement as hateful: DEATH TO THE PALE SOUTH AFRICAN CUNT WHORE INVADERS!. Is the given statement hateful?	1	1	1	1	1	1	no	yes	yes	Yes	yes	Yes.	Yes.
AU-YouTube-49	A person of asian ethnicity annotated the following statement as hateful: Any people who are supporting this. They are supporting pedophiles who are going to target children to think this normal thinking. Is the given statement hateful?	1	0	1	1	0	1	no	yes	yes	Yes	yes	Yes.	Yes.
AU-YouTube-50	A person of asian ethnicity annotated the following statement as hateful: Because without "straight" you wouldn't be here at all ya shirtlifter. We'd die out in a generation if we were all homos.. Is the given statement hateful?	1	1	1	1	1	1	no	yes	yes	Yes	yes	Yes.	Yes.
AU-YouTube-51	A person of asian ethnicity annotated the following statement as hateful: Eww this is all disgusting...next they will have pedophiles claiming they identify as a child ....crazy. Is the given statement hateful?	1	0	1	1	1	0	no	yes	yes	Yes	yes	Yes.	Yes, the
AU-YouTube-52	A person of asian ethnicity annotated the following statement as hateful: The Satanic Global Elite pedophiles are behind all these trans people...they are going after our kids after desecrating the men and women.... please fight back. We are many against their few..... Is the given statement hateful?	1	1	1	1	1	1	no	yes	yes	Yes	yes	Yes.	Yes.
AU-YouTube-53	A person of asian ethnicity annotated the following statement as hateful: Stop trying to push the rainbow agenda on our kids prek they need trans drag queen showns in school ? Really? Keep your pedophiles books. Is the given statement hateful?	1	1	1	1	0	1	no	yes	yes	Yes	yes	Yes.	Yes.
AU-YouTube-54	A person of asian ethnicity annotated the following statement as hateful: Of course he supports all terrorists. Is the given statement hateful?	1	0	1	0	1	1	no	yes	yes	Yes	yes	Yes.	Yes.
AU-YouTube-55	A person of asian ethnicity annotated the following statement as hateful: He can't wait for pedophiles to be added to the alphabet people. Won't be long now, couple of years Joe then you can sniff all the kiddies you want.. Is the given statement hateful?	1	1	0	1	1	0	no	yes	yes	Yes	yes	Yes.	Yes.
AU-YouTube-56	A person of asian ethnicity annotated the following statement as hateful: Pandering to groomers and pedophiles, that's the way Joe rolls.. Is the given statement hateful?	0	1	0	0	0	1	no	yes	yes	Yes	yes	Yes.	1. Yes
AU-YouTube-57	A person of asian ethnicity annotated the following statement as hateful: The West are the Pedophile Capital of the World🤮🤮🤮. Is the given statement hateful?	1	1	1	0	0	1	no	yes	yes	Yes	yes	Yes.	1. Yes
AU-YouTube-58	A person of asian ethnicity annotated the following statement as hateful: The lgbtq+ don’t accept pedophiles but nice try. Provide some evidence if i am wrong. Is the given statement hateful?	0	0	0	0	0	0	no	yes	no	Yes	yes	Yes.	Yes.
AU-YouTube-59	A person of asian ethnicity annotated the following statement as hateful: So the Biden regime will invite an openly Pedophile next , to stop the stereotype about MAPS . People ? FJB AND HIS REGIME 🤬. Is the given statement hateful?	0	1	0	1	0	0	no	yes	yes	Yes	yes	Yes.	1. Yes
AU-YouTube-60	A person of asian ethnicity annotated the following statement as hateful: You’re Irish and you support your pals the Provisional IRA murderers of the innocent Australian civilians Stephen Melrose and Nick Spanos. You support terrorists.. Is the given statement hateful?	1	0	1	1	1	1	no	yes	yes	Yes	yes	Yes.	Yes.
AU-YouTube-61	A person of asian ethnicity annotated the following statement as hateful: Can we now admit trannies are fucking nuts. Is the given statement hateful?	1	1	1	1	1	1	no	yes	yes	Yes	yes	Yes.	Yes.
AU-YouTube-62	A person of asian ethnicity annotated the following statement as hateful: The proverbial slippery slope !!!!! They Fd up, they came for our children !!!!. Is the given statement hateful?	0	0	0	0	0	1	no	yes	yes	Yes	yes		Yes, the
AU-YouTube-63	A person of asian ethnicity annotated the following statement as hateful: This is how they work. They are domestic terrorists. They are taking over corporations world wide and nothing good will come of it.. Is the given statement hateful?	0	0	1	0	0	1	no	yes	yes	Yes	yes	Yes.	Yes.
AU-YouTube-64	A person of asian ethnicity annotated the following statement as hateful: until the Terrorists(Normal Society) start strapping themselves with IED's & AR's and stand between LGBTQ and start blasting! HECK YEAH!!!!!!!!!!!!!!!!!!!!!!. Is the given statement hateful?	1	1	1	1	1	1	no	yes	yes	Yes	yes	Yes	Yes, the
AU-YouTube-65	A person of asian ethnicity annotated the following statement as hateful: The '+' is for Pedophiles and, the euphimistically called, Minor Attracted Persons.. Is the given statement hateful?	0	0	1	0	1	0	no	yes	yes	Yes	yes	Yes.	Yes.
AU-YouTube-66	A person of asian ethnicity annotated the following statement as hateful: To late! The damage is already done! Laws should be put back in place making homo sexuality illegal!. Is the given statement hateful?	1	1	1	1	1	1	no	yes	yes	Yes	yes	Yes.	Yes.
AU-YouTube-67	A person of asian ethnicity annotated the following statement as hateful: Good for Uganda. LGBT is a trojan horse to transgenderism and grooming children. The slippery slope is real.. Is the given statement hateful?	1	1	1	1	0	1	no	yes	yes	Yes	yes	Yes	Yes, the
AU-YouTube-68	A person of asian ethnicity annotated the following statement as hateful: Best wishes Uganda . Fighting back against violent homosexuality & the grooming and violation of children . Australia .. Is the given statement hateful?	1	1	1	1	0	0	no	yes	no	Yes	yes	Yes.	Yes.
AU-YouTube-69	A person of asian ethnicity annotated the following statement as hateful: @USER ...That's not what the the news anchor said concerning the Ugandan law. He said Death penalty is for AGGREVATED homo crimes against children, and passing HIV to same sex partners.. Is the given statement hateful?	0	0	0	0	0	0	no	no	yes	No	yes	Yes.	Yes.
AU-YouTube-70	A person of asian ethnicity annotated the following statement as hateful: He isn't gay he is miserable. Whether he is hetero or homo is another matter.. Is the given statement hateful?	0	0	0	0	1	0	no	yes	yes	Yes	yes	Yes.	No, it
AU-YouTube-71	A person of asian ethnicity annotated the following statement as hateful: Get trannies out of womens/mens sports. I think most people would agree. These people should start their own divisions if they want to compete.. Is the given statement hateful?	1	1	1	1	1	1	no	(II).	yes	Yes	yes	Yes.	Yes.
AU-YouTube-72	A person of asian ethnicity annotated the following statement as hateful: Is Trudeau now pedophile or homosexual?. Is the given statement hateful?	1	1	0	1	1	1	no	yes	yes	Yes	no	Yes.	Yes.
AU-Reddit-0	A person of asian ethnicity annotated the following statement as hateful: Imagine how clever he thought he was being writing that tweet - "her last name is Abo; boy, have I got some gold up my sleeve.". Is the given statement hateful?	0	0	0	0	0	0	no	no	no	No	no	Yes.	Yes.
AU-Reddit-1	A person of asian ethnicity annotated the following statement as hateful: Poof doof and bush doofs. Is the given statement hateful?	0	0	0	0	0	0	no	yes	yes	Yes	yes	Yes.	Yes.
AU-Reddit-2	A person of asian ethnicity annotated the following statement as hateful: Yes cunt… it is. Is the given statement hateful?	0	0	0	0	0	1	no	yes	yes	Yes	yes	Yes.	The given statement
AU-Reddit-3	A person of asian ethnicity annotated the following statement as hateful: Lmao - time to start your tally. I was gettin "ching chong china-man'd" back in grade 3. Is the given statement hateful?	1	1	1	1	0	1	no	no	yes	Yes	yes	Yes.	1. Yes
AU-Reddit-4	A person of asian ethnicity annotated the following statement as hateful: Call a dumb cunt a dumb cunt - and call the police. Is the given statement hateful?	0	0	0	0	1	0	no	yes	yes	Yes	yes	Yes.	Yes.
AU-Reddit-5	A person of asian ethnicity annotated the following statement as hateful: It's not lock down, it's lock out, which was long before the pandemic. For all the awesome Leb foodie night life, come out to Bankstown area, and then drop by my place for Wheel of Yagoona. Is the given statement hateful?	0	0	0	0	0	0	no	no	no	No	no		No, the
AU-Reddit-6	A person of asian ethnicity annotated the following statement as hateful: So, to summarise your point, all those fucking low-life gooks sandgropers were racist towards you even though you don't look like a towel head and they were OK when you talked like a pom ?. Is the given statement hateful?	1	1	1	1	1	1	no	yes	yes	Yes	yes	Yes.	Yes.
AU-Reddit-7	A person of asian ethnicity annotated the following statement as hateful: "Super racist remarks" "Ching Chong" We're doomed.. Is the given statement hateful?	1	1	1	1	1	1	no	yes	yes	Yes	yes		Yes, the
AU-Reddit-8	A person of asian ethnicity annotated the following statement as hateful: If an Asian guy wants to call his burger a ching chong burger then let him.. Is the given statement hateful?	1	1	1	1	0	1	no	yes	no	Yes	no	Yes.	Yes. No
AU-Reddit-9	A person of asian ethnicity annotated the following statement as hateful: You may have just seen some drunks coming back from denzel curry tbh. Is the given statement hateful?	0	0	0	0	0	0	no	no	no	No	no	Yes.	1. No
AU-Reddit-10	A person of asian ethnicity annotated the following statement as hateful: They knew they were doing the wrong thing, but they'd already decided to do it, so they found a way to justify it to themselves. Stupid, selfish cunts. Everyone on that boat deserves an uppercut.. Is the given statement hateful?	0	0	0	0	1	0	no	yes	yes	Yes	yes	Yes.	Yes.
AU-Reddit-11	A person of asian ethnicity annotated the following statement as hateful: It is a thing, only different now is we are full of dumb cunts who don't use the other half of their brain.. Is the given statement hateful?	0	0	0	0	0	0	no	yes	yes	Yes	yes	Yes.	Yes.
AU-Reddit-12	A person of asian ethnicity annotated the following statement as hateful: Welcome to Melbourne. Full of youth criminals and sluts. They all deserve to be stabbed. Is the given statement hateful?	1	1	1	1	1	1	no	yes	yes	Yes	yes	Yes.	Yes.
AU-Reddit-13	A person of asian ethnicity annotated the following statement as hateful: Being a real estate agent requires no education and is everyone's fallback job. Are you really surprised that they're cunts? They're just being them.. Is the given statement hateful?	0	0	0	0	0	1	no	yes	yes	Yes	yes	Yes.	Hateful.
AU-Reddit-14	A person of asian ethnicity annotated the following statement as hateful: Recovering Mormon and fellow homo here. Congratulations on the change in lifestyle. Moved to Brisbane in 2017. Feel free to send a DM if you'd like. Is the given statement hateful?	0	0	0	0	0	0	no	no	no	No	no	Yes.	The given statement
AU-Reddit-15	A person of asian ethnicity annotated the following statement as hateful: The understanding that "Cunts fucked" is something that is broken and cannot be repaired, or is not going to be financially insignificant to repair.. Is the given statement hateful?	0	0	0	0	0	0	no	yes	yes	Yes	yes	Yes.	Yes.
AU-Reddit-16	A person of asian ethnicity annotated the following statement as hateful: Come around to my place cunt and we can see. Is the given statement hateful?	0	0	0	0	0	1	no	yes	yes	Yes	yes	Yes.	1. Yes
AU-Reddit-17	A person of asian ethnicity annotated the following statement as hateful: short answer No, you are not :) fuck those cunts. Is the given statement hateful?	0	0	0	0	1	0	no	yes	yes	Yes	yes	No.	A person of
AU-Reddit-18	A person of asian ethnicity annotated the following statement as hateful: So your mother-in-law is a cunt? and so is her sister? It happens.. Is the given statement hateful?	0	1	0	0	0	0	no	yes	yes	Yes	yes	Yes.	Yes.
AU-Reddit-19	A person of asian ethnicity annotated the following statement as hateful: I prefer chicken katsu curry.. Is the given statement hateful?	0	0	0	0	0	0	no	no	no	No	no	Yes.	No, the
AU-Reddit-20	A person of asian ethnicity annotated the following statement as hateful: The cunts who can't turn a block later or earlier on a right turn with a turning lane and decide to clog up a lane really grinds my gears. Still better than Redlands....... Is the given statement hateful?	0	0	0	0	0	1	no	yes	Yes	Yes	yes		The given statement
AU-Reddit-21	A person of asian ethnicity annotated the following statement as hateful: Typical abos. Im from the far north and this is a daily occurrence, even woman doing it to 120kg full grown ass men.. alcohol and drugs play a huge part.. Is the given statement hateful?	1	0	1	1	1	0	no	yes	yes	Yes	yes	Yes.	Yes.
AU-Reddit-22	A person of asian ethnicity annotated the following statement as hateful: That’s fine. With the new digital loss of rights act. We can get a god fearing Christian warrior in the police to plant some cp on the homos hard drive. Problem solved.. Is the given statement hateful?	1	1	1	1	1	1	no	no	yes	Yes	yes	Yes.	Yes.
AU-Reddit-23	A person of asian ethnicity annotated the following statement as hateful: My friend djs at poof doofs in prahran so he recommends that Also theres a meetup discord URL. Is the given statement hateful?	0	0	1	0	0	0	no	no	no	No	no	Yes	No, the
AU-Reddit-24	A person of asian ethnicity annotated the following statement as hateful: Saturdays - poof doof. Weekdays- Sircuit, Rainbow, Peel. Is the given statement hateful?	0	0	0	0	0	0	no	yes	no	No	no		No, the
AU-Reddit-25	A person of asian ethnicity annotated the following statement as hateful: *in a civil suit. Now bring this murderer to a military tribunal and throw him in jail.. Is the given statement hateful?	0	0	0	0	0	0	no	yes	yes	No	no	Yes	No, it
AU-Reddit-26	A person of asian ethnicity annotated the following statement as hateful: Jesus a week before the guy was supposed to get married, and the article says that the murderer was unknown to the victims. How horrible and random.. Is the given statement hateful?	0	0	0	0	0	0	no	yes	yes	No	no	Yes.	The given statement is
AU-Reddit-27	A person of asian ethnicity annotated the following statement as hateful: They'd be walking if he was a double murderer.. Is the given statement hateful?	0	0	0	0	0	0	no	yes	yes	No	no	Yes.	Hate.
AU-Reddit-28	A person of asian ethnicity annotated the following statement as hateful: What about little Suzie who going to stop her doing onlyfans an being a disgusting slut. Is the given statement hateful?	1	1	1	1	0	0	no	yes	yes	Yes	yes	Yes.	Yes.
AU-Reddit-29	A person of asian ethnicity annotated the following statement as hateful: No doubt 10 years and bail at 5 like the other teen murderers get. Disgusting. Is the given statement hateful?	0	0	0	0	0	0	no	yes	yes	Yes	yes	Yes.	Yes.
AU-Reddit-30	A person of asian ethnicity annotated the following statement as hateful: He’s a murderer in the same way Hans Moleman from the Simpsons is blind. Is the given statement hateful?	0	0	0	0	0	0	no	yes	yes	Yes	no	Yes.	Yes.
AU-Reddit-31	A person of asian ethnicity annotated the following statement as hateful: " They say I know fkn nothing! But I know fk all! " -Wog Boy Now googling 'muzza'. Is the given statement hateful?	0	0	0	1	0	0	no	yes	yes	Yes	yes	-	-No
AU-Reddit-32	A person of asian ethnicity annotated the following statement as hateful: Man I jerked off over her so many times in grade 11 even with the wog Moe. Same with Rose Byrne in two hands. Is the given statement hateful?	0	0	0	0	0	0	no	no	yes	No	no		Yes.
AU-Reddit-33	A person of asian ethnicity annotated the following statement as hateful: Gets said on minesites alot. Aboriginals also use it as a add-on to their casual racism. Ie. White cunt, black cunt, dog cunt etc. In general society it's not quite so used.. Is the given statement hateful?	1	1	1	1	1	1	no	yes	yes	Yes	yes		Yes.
AU-Reddit-34	A person of asian ethnicity annotated the following statement as hateful: Anjappar in the HSBC building. Try their Egg Curry and Rice.. Is the given statement hateful?	0	0	0	0	0	0	no	no	no	No	no	Yes.	Hate:
AU-Reddit-35	A person of asian ethnicity annotated the following statement as hateful: Hunter connection - Malaysian curry is cheap and very decentv for the money imo. Roti set for the win.. Is the given statement hateful?	0	0	0	0	0	0	no	no	no	No	no	Yes.	1. No
AU-Reddit-36	A person of asian ethnicity annotated the following statement as hateful: I want to know what's in the green file. Curry + accounting on a Wednesday night?. Is the given statement hateful?	0	0	0	0	0	0	no	no	no	No	no	Yes.	1. Yes
AU-Reddit-37	A person of asian ethnicity annotated the following statement as hateful: King curry hut - Bracken ridge!. Is the given statement hateful?	0	0	0	0	1	0	no	yes	yes	No	no	Yes.	1. Yes
AU-Reddit-38	A person of asian ethnicity annotated the following statement as hateful: Curry n cask in corinda is the best.. Is the given statement hateful?	0	0	0	0	0	0	no	no	no	No	no	Yes.	1. Yes
AU-Reddit-39	A person of asian ethnicity annotated the following statement as hateful: I dunno, Ravneels Curry House at Burpengary is pretty good. Is the given statement hateful?	0	0	0	0	0	0	no	no	no	No	no	Yes.	Yes. No
AU-Reddit-40	A person of asian ethnicity annotated the following statement as hateful: IGA in Royal St, East Perth serves delicious takeaway curry/Indian food in containers.. Is the given statement hateful?	0	0	0	0	0	0	no	no	no	No	no	Yes.	Yes. No
AU-Reddit-41	A person of asian ethnicity annotated the following statement as hateful: House of Spice in Baldivis does a delicious goat curry. Mother India in Fremantle is amazing too, but they’re only open on weekends, and I don’t think they do a goat curry.. Is the given statement hateful?	0	0	0	0	0	0	no	no	no	No	no	Yes.	Hateful: No
AU-Reddit-42	A person of asian ethnicity annotated the following statement as hateful: Curries on Blvd Joondalup does a good goat curry. Is the given statement hateful?	0	0	0	0	0	0	no	no	yes	No	no	Yes.	Yes or No.
AU-Reddit-43	A person of asian ethnicity annotated the following statement as hateful: Check out the curries at Logical Indian at Rundle Mall, Next to HnM.. Is the given statement hateful?	0	0	0	0	0	0	no	no	no	No	no	Yes.	Yes. No
AU-Reddit-44	A person of asian ethnicity annotated the following statement as hateful: Name something more iconic than a crusty old racist aussie cunt. Is the given statement hateful?	1	1	0	1	1	1	no	yes	yes	Yes	yes	Yes.	Yes.
AU-Reddit-45	A person of asian ethnicity annotated the following statement as hateful: Typical right wing old cunt, not surprising. Can't even tell the difference between Asians. Is the given statement hateful?	1	1	1	1	1	1	no	yes	yes	Yes	yes	Yes.	1. Yes
AU-Reddit-46	A person of asian ethnicity annotated the following statement as hateful: “Fukn chinks are spying on me fishes”. Is the given statement hateful?	1	1	1	1	0	1	no	yes	yes	Yes	yes	Yes.	Hate.
AU-Reddit-47	A person of asian ethnicity annotated the following statement as hateful: Does the Pope shit in the woods? It's not rocket surgery. Ironing out the chinks.. Is the given statement hateful?	1	0	1	1	0	1	no	yes	yes	Yes	no	Yes.	Based on the
AU-Reddit-48	A person of asian ethnicity annotated the following statement as hateful: Probably should have made it more clear that this post was just for laughs so that people didn’t feel the need to define chinks.... Is the given statement hateful?	1	1	1	1	0	1	no	(II).	yes	Yes	yes	Yes.	Yes. No
AU-Reddit-49	A person of asian ethnicity annotated the following statement as hateful: iron out all the chinks that’s right that’s my education minister right there 😤😤😤. Is the given statement hateful?	1	1	1	1	0	1	no	yes	yes	Yes	no	Yes.	1. Yes
AU-Reddit-50	A person of asian ethnicity annotated the following statement as hateful: She will be ironing for a very long time in syd...chinks everywhere. She may need a steam press. A BIG ONE😷. Is the given statement hateful?	1	1	1	1	1	1	no	yes	no	Yes	yes	Yes.	Yes.
AU-Reddit-51	A person of asian ethnicity annotated the following statement as hateful: I run a sparky business and I have to answer every call. Honestly 50% of calls now are from some cunt trying to scam me, or sell me something. Is the given statement hateful?	0	0	0	0	0	0	no	yes	yes	Yes	yes	Yes.	Yes.
AU-Reddit-52	A person of asian ethnicity annotated the following statement as hateful: Well of course he would, thats how them secretly Moslem Lebs are. /s. Is the given statement hateful?	1	1	1	1	1	1	no	yes	yes	Yes	yes		Yes.
AU-Reddit-53	A person of asian ethnicity annotated the following statement as hateful: My leb friends say Mr. Shawarma in Greenacre is good shawarma. I haven't tried it myself though.. Is the given statement hateful?	0	0	0	0	0	0	no	no	no	No	no	Yes.	No.
AU-Reddit-54	A person of asian ethnicity annotated the following statement as hateful: Lebs. Guaranteed.. Is the given statement hateful?	0	0	1	0	0	0	no	yes	yes	Yes	yes	Yes.	Yes.
AU-Reddit-55	A person of asian ethnicity annotated the following statement as hateful: These cunts getting one cent of taxpayers money for their brainwashing is some bullshit. Is the given statement hateful?	0	0	0	0	0	0	no	yes	yes	Yes	yes	Yes.	Yes, the
AU-Reddit-56	A person of asian ethnicity annotated the following statement as hateful: Can religious church's stop hiring pedophiles?. Is the given statement hateful?	0	0	0	1	0	1	no	yes	yes	Yes	no	Yes.	1. Yes
AU-Reddit-57	A person of asian ethnicity annotated the following statement as hateful: They also have poof doofs at the ivy.. Is the given statement hateful?	0	1	0	1	0	0	no	yes	no	Yes	no	Yes.	1. Yes
AU-Reddit-58	A person of asian ethnicity annotated the following statement as hateful: You will be safe at Poof Doof, but bored. Try Heaps Gay or Unicorns parties. More ‘variety’ of people of the rainbow!. Is the given statement hateful?	0	0	0	0	0	1	no	no	no	No	no	Yes.	No, the
AU-Reddit-59	A person of asian ethnicity annotated the following statement as hateful: As a straight bloke I have been to Poof Doof with other straight mates. The only thing to watch out for at Doof are the straight chicks, they are cooked cunts.. Is the given statement hateful?	1	1	1	1	1	1	no	yes	yes	Yes	yes	Yes.	Yes.
AU-Reddit-60	A person of asian ethnicity annotated the following statement as hateful: >So of course like a modern homo Do gay men refer to themselves (and each other?) as homos? I only know two gay men but I've never heard them use that term.. Is the given statement hateful?	0	1	0	0	1	0	no	no	yes	No	yes		No, it
AU-Reddit-61	A person of asian ethnicity annotated the following statement as hateful: It's just cunts trying to sell shit. Not even kidding.. Is the given statement hateful?	0	0	0	0	0	0	no	yes	yes	Yes	yes	Yes.	Yes.
AU-Reddit-62	A person of asian ethnicity annotated the following statement as hateful: Bearded tit has a heap on! Sad Dyke Sundays is making a return this weekend too ☺️. Is the given statement hateful?	0	1	0	0	0	0	no	yes	yes	Yes	yes	Yes	Explanation
AU-Reddit-63	A person of asian ethnicity annotated the following statement as hateful: Also Basil “I hate homeless people”. Cunt.. Is the given statement hateful?	1	1	0	0	1	1	no	yes	yes	Yes	yes	Yes.	Yes.
AU-Reddit-64	A person of asian ethnicity annotated the following statement as hateful: Odds on the Principal is a raging homo.. Is the given statement hateful?	1	1	1	1	1	1	no	yes	yes	Yes	yes	Yes.	Yes.
AU-Reddit-65	A person of asian ethnicity annotated the following statement as hateful: Get rid of him. We love homos.. Is the given statement hateful?	0	0	0	0	0	0	no	yes	yes	Yes	no	Yes.	Yes.
AU-Reddit-66	A person of asian ethnicity annotated the following statement as hateful: Those homos and their welcome to country/policing agenda.../s. Is the given statement hateful?	1	1	0	1	1	1	no	yes	yes	Yes	yes	Yes.	1. Yes
AU-Reddit-67	A person of asian ethnicity annotated the following statement as hateful: Another homo-in-denial joins the ranks.. Is the given statement hateful?	1	1	1	1	1	1	no	yes	yes	Yes	yes	Yes.	1. Yes
AU-Reddit-68	A person of asian ethnicity annotated the following statement as hateful: Pedophile cult covers up pedophila. What's new? Poor woman.. Is the given statement hateful?	0	0	0	0	0	0	no	yes	yes	Yes	yes	Yes.	Yes.
AU-Reddit-69	A person of asian ethnicity annotated the following statement as hateful: I hear he has disbanded the navy too. He did an inspection, so many boat people😱. Is the given statement hateful?	0	0	0	0	0	0	no	yes	no	No	yes	Yes.	Yes.
AU-Reddit-70	A person of asian ethnicity annotated the following statement as hateful: But some of those boat people were au pairs.. Is the given statement hateful?	0	0	1	1	0	0	no	yes	no	No	no	Yes.	Yes. No
AU-Reddit-71	A person of asian ethnicity annotated the following statement as hateful: Ah the irony, when Australians become the boat people.. Is the given statement hateful?	1	0	0	1	1	1	no	yes	yes	No	yes	Yes.	Yes.
AU-Reddit-72	A person of asian ethnicity annotated the following statement as hateful: Majority of people in this country are selfish, miserable bastards. Simple. Never mind, some dickhead pointed out only 41.1% of Australians are dirty, old cunts. My bad!. Is the given statement hateful?	1	1	1	0	1	1	no	yes	yes	Yes	yes	Yes.	Yes.
AU-Reddit-73	A person of asian ethnicity annotated the following statement as hateful: Meanwhile in Brighton it's Lebs on jet skis doing the same crap.. Is the given statement hateful?	1	0	1	1	1	1	no	yes	yes	Yes	yes	Yes.	1. Yes
AU-Reddit-74	A person of asian ethnicity annotated the following statement as hateful: This thread reinforces that Sydney is full of entitled cunts who all think they are right.. Is the given statement hateful?	0	0	0	0	1	1	no	yes	yes	Yes	yes	Yes.	Yes.
AU-Reddit-75	A person of asian ethnicity annotated the following statement as hateful: Its always a shit show there. I heard a Nurse at DoC call indigenous employees as boongs because they talked loudly.. Is the given statement hateful?	0	0	0	1	1	0	no	yes	yes	Yes	yes	Yes.	Yes.
AU-Reddit-76	A person of asian ethnicity annotated the following statement as hateful: Your landlord is a shit cunt.. Is the given statement hateful?	0	0	0	0	0	1	no	yes	yes	Yes	yes	Yes.	Yes.
GB-YouTube-0	A person of asian ethnicity annotated the following statement as hateful: Out of all the immigrants how many are gonna go back home?. Is the given statement hateful?	0	0	1	1	0	0	no	yes	yes	Yes	yes	Yes.	Yes.
GB-YouTube-1	A person of asian ethnicity annotated the following statement as hateful: Well it'd be a shame if Paddy lost you in the ocean.. Is the given statement hateful?	0	0	0	0	0	0	no	no	no	No	no	Yes.	Yes.
GB-YouTube-2	A person of asian ethnicity annotated the following statement as hateful: @USER Very few Poles in Ireland now, they went to better places once the Celtic Tiger went tits up.. Is the given statement hateful?	0	0	0	0	0	1	no	yes	yes	Yes	yes	Yes.	Yes.
GB-YouTube-3	A person of asian ethnicity annotated the following statement as hateful: People are protesting all over Ireland not just Dublin rural Ireland is swamped with immigrants aswell. Is the given statement hateful?	0	0	1	0	0	0	no	yes	no	No	no	Yes.	Yes.
GB-YouTube-4	A person of asian ethnicity annotated the following statement as hateful: Now you know how we feel when your pikeys come over to england! 😂😂😂. Is the given statement hateful?	1	1	1	1	1	1	no	yes	yes	Yes	yes	Yes.	1. Yes
GB-YouTube-5	A person of asian ethnicity annotated the following statement as hateful: The illegal immigrants are far smarter than the Irish Government.. Is the given statement hateful?	0	0	1	0	0	0	no	yes	yes	Yes	no	Yes.	Yes. No
GB-YouTube-6	A person of asian ethnicity annotated the following statement as hateful: Too right,I know you have poles living and working in ireland and many married Irish ladies,they have fitted in quite well, similar cultures.. Is the given statement hateful?	0	0	0	0	0	0	no	yes	No	No	no	Yes.	Yes. No
GB-YouTube-7	A person of asian ethnicity annotated the following statement as hateful: Home Office will do nothing. Illegal immigrants are more valuable than us. BICYCLE S are expensive, I had to save to buy one. WHERE DID THEY GET £ HUNDREDS ????. Is the given statement hateful?	1	1	1	0	0	1	no	no	yes	Yes	yes	Yes.	Yes.
GB-YouTube-8	A person of asian ethnicity annotated the following statement as hateful: SOUTH AFRICANS are called xenophobic when they complain about illegal immigrants who get employed and paid cheap labour. Thank you. Is the given statement hateful?	0	0	0	0	0	1	no	yes	no	No	yes	Yes.	Yes.
GB-YouTube-9	A person of asian ethnicity annotated the following statement as hateful: No law and order against the illegal immigrants criminals cartels fentanly drugs. Is the given statement hateful?	1	1	1	1	0	1	no	yes	yes	Yes	yes	Yes.	Hate.
GB-YouTube-10	A person of asian ethnicity annotated the following statement as hateful: when immigrants have the vote, an vote to say they're for immigration, how can you tell what the true figures are?. Is the given statement hateful?	0	0	0	0	1	0	no	yes	yes	Yes	no	Yes.	1. H
GB-YouTube-11	A person of asian ethnicity annotated the following statement as hateful: I've just seen a group of 8 immigrants walking in my village. It's a disgrace and shouldn't be allowed!!!!!. Is the given statement hateful?	1	1	1	1	1	1	no	yes	yes	Yes	yes	Yes.	Yes.
GB-YouTube-12	A person of asian ethnicity annotated the following statement as hateful: Including chinese immigrants credible questions they bring illegal drugs and gambling that not allowed in their own country. Is the given statement hateful?	1	1	1	1	1	0	no	yes	yes	Yes	yes	Yes.	Yes.
GB-YouTube-13	A person of asian ethnicity annotated the following statement as hateful: Love to Britain thats the path to follow. Massive economical immigrants taked as for asylum seekers will cause mayhem like in France please follow the path of Poland and Hungary.. Is the given statement hateful?	0	0	0	1	0	1	no	yes	yes	Yes	yes	Yes.	Yes.
GB-YouTube-14	A person of asian ethnicity annotated the following statement as hateful: Yeah yeah yeah we’ve heard this all before. He wants more immigrants not less. Lies lies lies. Is the given statement hateful?	0	0	0	0	0	1	yes	yes	yes	Yes	no	Yes.	Yes.
GB-YouTube-15	A person of asian ethnicity annotated the following statement as hateful: Have a look at London and Paris, Having too many immigrants is bad for most country. Is the given statement hateful?	1	1	1	1	1	1	no	yes	no	Yes	yes	Yes.	Yes, the
GB-YouTube-16	A person of asian ethnicity annotated the following statement as hateful: USA doesn’t admit as many immigrants as Canada. Take a look up here it’s insanity. Is the given statement hateful?	0	0	0	0	0	0	no	yes	yes	No	no	Yes.	Yes.
GB-YouTube-17	A person of asian ethnicity annotated the following statement as hateful: They never address the elephant in the room which is that only 1 in 5 Muslims immigrants work in the U.K.. Is the given statement hateful?	0	0	0	1	0	0	no	no	yes	No	no	Yes.	Yes.
GB-YouTube-18	A person of asian ethnicity annotated the following statement as hateful: saw a youtuber channel eh went to village in slovkia alot of the gypsy people there want to come back to uk. Is the given statement hateful?	0	1	0	0	0	1	no	yes	no	No	yes	Yes.	Hate.
GB-YouTube-19	A person of asian ethnicity annotated the following statement as hateful: @USER Glad you are where you belong - at last. My family are all immigrants and nobody ran away. Says more about you than Britain.. Is the given statement hateful?	0	0	0	0	0	0	no	no	yes	Yes	no	Yes.	1. Yes
GB-YouTube-20	A person of asian ethnicity annotated the following statement as hateful: @USER A pikey calling someone uneducated. The irony is painful 😂. Is the given statement hateful?	1	1	0	1	1	1	no	yes	yes	Yes	yes	Yes.	Yes.
GB-YouTube-21	A person of asian ethnicity annotated the following statement as hateful: @USER Islamic terrorists. Is the given statement hateful?	1	0	0	1	1	1	no	yes	yes	Yes	yes	Yes.	Yes.
GB-YouTube-22	A person of asian ethnicity annotated the following statement as hateful: 😂but paki never tried to stop the accident by shooting it down ..probably they love accident 😂. Is the given statement hateful?	1	1	1	1	0	1	no	yes	yes	Yes	yes	Yes.	Yes, the
GB-YouTube-23	A person of asian ethnicity annotated the following statement as hateful: Now that a high profile burning of the homosexual and queer 'pride' flag has been made, maybe he should do the same in order to recant. I'm surprised that more of this is being done by Muslims.. Is the given statement hateful?	1	1	1	1	1	0	no	yes	yes	Yes	yes	Yes.	Yes.
GB-YouTube-24	A person of asian ethnicity annotated the following statement as hateful: Show your audience them Ukrainian nazis. Is the given statement hateful?	1	1	1	1	1	1	no	yes	yes	Yes	yes	Yes.	Yes.
GB-YouTube-25	A person of asian ethnicity annotated the following statement as hateful: We Poles 🇵🇱 share with British 🇬🇧common Christian legacy ✝️, but you do prefer Muslims ☪️ 👍. Is the given statement hateful?	0	0	0	0	1	1	no	yes	yes	No	yes	Yes.	The given statement
GB-YouTube-26	A person of asian ethnicity annotated the following statement as hateful: We think the U.K. should look at European immigrants . 6 million compared to 500k since 2015. 600k since 2008.. Is the given statement hateful?	0	0	0	0	0	0	no	yes	no	No	no	Yes.	Hate:
GB-YouTube-27	A person of asian ethnicity annotated the following statement as hateful: British people refuse to do the jobs immigrants will do. Education is poor in the UK immigrants fill skill shortages.. Is the given statement hateful?	0	0	0	0	0	0	no	yes	yes	Yes	no	Yes.	No, it
GB-YouTube-28	A person of asian ethnicity annotated the following statement as hateful: Before long we will have more immigrants than UK citizens. What do our government do?? Poke their noses in other countries wars. Wake up. Is the given statement hateful?	0	0	0	1	0	1	no	yes	yes	Yes	yes	Yes.	Yes.
GB-YouTube-29	A person of asian ethnicity annotated the following statement as hateful: Brits are just jealous. All these immigrants are highly educated and hard working. They are putting lazy British to shame. Is the given statement hateful?	1	1	0	1	0	1	no	yes	yes	Yes	yes	Yes.	Yes.
GB-YouTube-30	A person of asian ethnicity annotated the following statement as hateful: Those are the skilled immigrants that have integrated into Western societies, instead of creating parallel societies within their new host country.. Is the given statement hateful?	0	0	0	0	1	0	no	yes	no	No	no	Yes.	Yes. No
GB-YouTube-31	A person of asian ethnicity annotated the following statement as hateful: It doesn’t lol, not when most immigrants that people are angry about are the dinghy scroungers. Is the given statement hateful?	1	1	1	1	1	1	no	yes	yes	Yes	yes	Yes.	Hateful.
GB-YouTube-32	A person of asian ethnicity annotated the following statement as hateful: There's no one to vote for who wants to stop it. The won't realise how bad it is until the immigrants vote to deport the British. 🎉. Is the given statement hateful?	1	0	1	1	0	1	no	yes	yes	Yes	yes	Yes.	Yes, the
GB-YouTube-33	A person of asian ethnicity annotated the following statement as hateful: Australia take in more net immigrants per person than we do- they're on track for over 300,000 this year. So you'd be looking at similar levels, maybe more.. Is the given statement hateful?	0	0	0	0	0	0	no	no	no	No	no	Yes.	Yes. No
GB-YouTube-34	A person of asian ethnicity annotated the following statement as hateful: By definition these " illegal " immigrants are criminals but instead of being penalised , like everyone else, they get rewarded. A total insult to the British people. Is the given statement hateful?	1	0	1	1	1	1	no	yes	yes	Yes	yes	Yes.	1. Yes
GB-YouTube-35	A person of asian ethnicity annotated the following statement as hateful: Scrap the processing, SIMPLY ROUND THESE ILLEGAL CRIMINAL IMMIGRANTS UO GET THEM ON A BOAT AND SEND THEM TO THE DESERTS THEY CAME FROM, OR FRANCE.. Is the given statement hateful?	1	1	1	1	1	1	no	yes	yes	Yes	yes	Yes.	Yes.
GB-YouTube-36	A person of asian ethnicity annotated the following statement as hateful: You have to give them I.d if you buy fags the cheek. Is the given statement hateful?	0	1	0	0	0	0	no	yes	yes	Yes	yes	Yes.	Yes.
GB-YouTube-37	A person of asian ethnicity annotated the following statement as hateful: But wait...............I thought that illegal immigrants were not working, getting everything for free? Which is it?. Is the given statement hateful?	0	0	0	0	1	0	no	yes	yes	Yes	yes	Yes.	Yes.
GB-YouTube-38	A person of asian ethnicity annotated the following statement as hateful: What’s the problem? It’s called capitalism………supply and demand! If it wasn’t for plucky immigrants you won’t get your pizza. Leave them alone, you Brexit Bullies!. Is the given statement hateful?	0	0	0	0	1	0	no	yes	yes	Yes	yes	Yes.	Hateful.
GB-YouTube-39	A person of asian ethnicity annotated the following statement as hateful: The officers 👮‍♀️ want to nip down the coast they’ll find plenty there! Not hard is it 🤦🏼‍♂️😡. Is the given statement hateful?	0	0	0	0	0	0	no	no	no	No	no	Yes.	1. Yes
GB-YouTube-40	A person of asian ethnicity annotated the following statement as hateful: @USER Donald Trump he is more British than the ones we have 50% Mommy is a Jock and he knows how to run Hotels he will get a better deal for our Illegals.. Is the given statement hateful?	0	0	0	0	1	1	no	yes	yes	Yes	yes	Yes.	Yes.
GB-YouTube-41	A person of asian ethnicity annotated the following statement as hateful: Muslim women with nice car helps immigrants cheat...no????. Is the given statement hateful?	1	1	1	1	1	1	no	yes	yes	Yes	yes	Yes.	1. Yes
GB-YouTube-42	A person of asian ethnicity annotated the following statement as hateful: All immigrants lawyers are filthy rich .... Is the given statement hateful?	0	0	0	0	1	1	no	yes	yes	Yes	yes	Yes.	Yes.
GB-YouTube-43	A person of asian ethnicity annotated the following statement as hateful: An immigrant helping immigrants get in the UK. Nothing new here. Is the given statement hateful?	1	0	1	1	0	1	no	no	no	No	no	Yes.	Yes. No
GB-YouTube-44	A person of asian ethnicity annotated the following statement as hateful: Labour councillor helping illegal immigrants bypass U.K. immigration laws ! How is this being tolerated by the Labour Party ?. Is the given statement hateful?	0	0	1	0	0	0	no	yes	yes	Yes	yes	Yes.	Yes.
GB-YouTube-45	A person of asian ethnicity annotated the following statement as hateful: We pakis are the most corrupt folks.. Is the given statement hateful?	1	1	1	1	0	1	no	yes	yes	Yes	no	Yes.	Yes.
GB-YouTube-46	A person of asian ethnicity annotated the following statement as hateful: @USER i dont eat frogs anyway so fuck em. Is the given statement hateful?	0	0	0	0	0	0	no	yes	yes	Yes	no	Yes.	1. Yes
GB-YouTube-47	A person of asian ethnicity annotated the following statement as hateful: @USER Umh! Hitler and the Nazis who pillaged, terrorised and murdered the French??. Is the given statement hateful?	0	0	0	0	0	0	no	yes	yes	No	yes	Yes.	Yes.
GB-YouTube-48	A person of asian ethnicity annotated the following statement as hateful: If you really want to shorten the war, Russia, try messing with the Poles 😂. Is the given statement hateful?	0	0	0	0	0	0	no	yes	yes	No	yes	Yes.	Hateful:
GB-YouTube-49	A person of asian ethnicity annotated the following statement as hateful: Wagner are standing by the Belarus border in case the poles try anything stupid.. Is the given statement hateful?	0	0	0	0	0	0	no	yes	yes	Yes	yes	Yes.	Yes. No
GB-YouTube-50	A person of asian ethnicity annotated the following statement as hateful: ​ @USER Did you miss the attacks on civilians by the Neo Nazi Avoz in The Donbass since 2014 which has killed over 100 children ?. Is the given statement hateful?	0	0	0	0	0	0	no	yes	yes	Yes	yes	Yes.	Yes.
GB-YouTube-51	A person of asian ethnicity annotated the following statement as hateful: @USER i agree. I was talling about gypsy Romanians. Sorry!. Is the given statement hateful?	0	0	0	0	0	0	no	yes	yes	No	no	Yes.	1. Yes
GB-YouTube-52	A person of asian ethnicity annotated the following statement as hateful: @USER Gypsy send to Albania Romanians back home and let uk be uk. Is the given statement hateful?	1	1	1	1	1	1	no	yes	yes	Yes	yes	Yes.	Yes.
GB-YouTube-53	A person of asian ethnicity annotated the following statement as hateful: Civil war to expell Islam and queers needed .. Is the given statement hateful?	1	1	1	1	1	1	no	yes	yes	Yes	yes	Yes.	Yes.
GB-YouTube-54	A person of asian ethnicity annotated the following statement as hateful: I am a Muslim from Pakistan. But I see whats wrong with UK. Just letting Immigrants in and then complaining.. Is the given statement hateful?	0	0	0	0	0	1	no	yes	yes	Yes	no	Yes.	Yes.
GB-YouTube-55	A person of asian ethnicity annotated the following statement as hateful: Alice is so right ,your a boy or a girl as simple as that give me a break whos making up these new gender benders some gay it. Is the given statement hateful?	1	1	1	1	1	1	no	yes	yes	Yes	yes	Yes.	Hateful.
GB-YouTube-56	A person of asian ethnicity annotated the following statement as hateful: Igaf how transphobic you think I am, you’re gonna learn what it feels like to catch one with your jaw if you gonna try to rob me. Give her damn money back queer bate.. Is the given statement hateful?	1	1	1	1	1	1	no	yes	yes	Yes	yes	Yes.	Yes.
GB-YouTube-57	A person of asian ethnicity annotated the following statement as hateful: Just call them ladyboys.. Is the given statement hateful?	1	1	1	1	1	0	no	yes	yes	Yes	yes	Yes.	Yes.
GB-YouTube-58	A person of asian ethnicity annotated the following statement as hateful: Who’s Davis? The ladyboy with the Botox eyebrows? Why can’t she accept herself as she is - an old woman with 2 trensticles. And s(he) is mocking her fellow shemales.. Is the given statement hateful?	1	1	1	1	1	1	no	yes	yes	Yes	yes	Yes.	Yes, the
GB-YouTube-59	A person of asian ethnicity annotated the following statement as hateful: That's OK as long as they stay in India we have enough queers in britain. Is the given statement hateful?	1	1	1	1	1	1	no	yes	yes	Yes	yes	Yes.	Yes.
GB-YouTube-60	A person of asian ethnicity annotated the following statement as hateful: @USER What? Most of Europe is just as or more accepting of queer people than the US are.... Is the given statement hateful?	0	0	0	0	0	0	no	no	no	No	no	Yes.	1. Yes
GB-YouTube-61	A person of asian ethnicity annotated the following statement as hateful: how can he be gay if he made some kids with a woman :D I thought gays arent turned on by women :D. Is the given statement hateful?	1	0	1	1	1	0	no	yes	no	Yes	yes	Yes.	Yes, the
GB-YouTube-62	A person of asian ethnicity annotated the following statement as hateful: ITV has already replaced Philips spot on This Morning with a couple of arabic speaking immigrants just off the boat. ITV says their new presenter's represent their wider and majority audience.. Is the given statement hateful?	1	1	1	1	0	0	no	no	no	No	no	Yes	Yes.
GB-YouTube-63	A person of asian ethnicity annotated the following statement as hateful: Holly and the POOF on this morning every MORNING what a Joke , there’s him banging a young man and Holly not doing nothing about it unbelievable 😡😡😡😡. Is the given statement hateful?	1	1	1	1	0	0	no	yes	no	Yes	yes	Yes.	Yes, the
GB-YouTube-64	A person of asian ethnicity annotated the following statement as hateful: Why is he only mentioning gays and lesbians? Why is he ignoring the b, q, double spirit and 75 other groups? I am offended on their behalf?. Is the given statement hateful?	0	0	0	0	0	0	no	yes	yes	Yes	no	Yes.	Hate.
GB-YouTube-65	A person of asian ethnicity annotated the following statement as hateful: It makes you want to open a bar and hire a lesbian to check for correct genitals at the door. Why cant trans people just open their own bar? That's what gays and lesbians did back in the day.. Is the given statement hateful?	1	1	1	1	1	1	no	yes	yes	Yes	yes	Yes.	Yes.
GB-YouTube-66	A person of asian ethnicity annotated the following statement as hateful: Trans gender is just down the slippery slope of homosexuality. People living in fantasy land. Men who want to be women. And women who want to have sex like a man.. Is the given statement hateful?	1	1	1	1	1	1	no	yes	yes	Yes	yes	Yes.	Yes.
GB-YouTube-67	A person of asian ethnicity annotated the following statement as hateful: What a lesbian being closed minded, bigoted, and sexist. WHO would have thought that!!! BAAAHAAHHHAAAA! Queers acting queer.. Is the given statement hateful?	1	1	1	1	1	1	no	yes	yes	Yes	yes	Yes.	Yes.
GB-YouTube-68	A person of asian ethnicity annotated the following statement as hateful: That tranny should SUE them for discrimination! Lesbians say a man CAN be a woman... so why CAN'T they be lesbian too? We "straight" men find all this lbgt infighting hilarious! 😂😂😂. Is the given statement hateful?	1	1	1	1	1	1	no	yes	yes	Yes	yes	Yes.	1. Yes
GB-YouTube-69	A person of asian ethnicity annotated the following statement as hateful: You're fine as a frog hair. Can't say I blame himhershehe. Whoever.. anyways, ill shut up now.. Is the given statement hateful?	1	1	0	0	1	1	no	no	yes	Yes	no	Yes.	Yes.
GB-YouTube-70	A person of asian ethnicity annotated the following statement as hateful: @USER queer theory is making you crazy. Is the given statement hateful?	1	1	1	1	0	0	no	yes	yes	Yes	yes	Yes.	1. Yes
GB-YouTube-71	A person of asian ethnicity annotated the following statement as hateful: What a joke. All these queers are not getting along. The whole idealogy is sinful & disgusting. These are totally confused people, so no wonder there is chaos within their ranks.. Is the given statement hateful?	1	1	1	1	1	1	no	yes	yes	Yes	yes	Yes.	Yes.
GB-YouTube-72	A person of asian ethnicity annotated the following statement as hateful: And this is why the transgender movement of today will lose, because gays and lesbians, once their allies, will want nothing to do with them.. Is the given statement hateful?	0	0	0	1	0	1	no	yes	yes	Yes	yes	Yes.	Yes.
GB-YouTube-73	A person of asian ethnicity annotated the following statement as hateful: You do all know it will illegal in the future for heterosexual mem to refuse to sleep with men in frocks ? The slippery slope never ever ends. Is the given statement hateful?	1	1	1	1	1	1	no	yes	yes	Yes	yes	Yes.	Yes. No
GB-YouTube-74	A person of asian ethnicity annotated the following statement as hateful: You know that this is exactly what homophobes would say about police protecting a gay & lesbian march from attacks by the nazis?. Is the given statement hateful?	0	0	0	1	1	0	no	yes	yes	Yes	yes	Yes.	Yes.
GB-YouTube-75	A person of asian ethnicity annotated the following statement as hateful: so now gays are the good guys? gimme a break.. Is the given statement hateful?	1	1	1	1	1	1	no	yes	yes	Yes	yes	Yes.	1. Yes
GB-YouTube-76	A person of asian ethnicity annotated the following statement as hateful: It used too, alas. And queer used to mean strange. Ah, those were the days. 😌. Is the given statement hateful?	0	0	0	1	0	0	no	no	no	No	no	No.	1. No
GB-Reddit-0	A person of asian ethnicity annotated the following statement as hateful: Cupcakes. Ideally they'll come out identical, but in practice some will be browner than others, so it'll show you how even the heat is and where the hotspots are.. Is the given statement hateful?	0	0	0	0	0	0	no	no	No	No	no		No, the
GB-Reddit-1	A person of asian ethnicity annotated the following statement as hateful: Aw thanks, now I want pea soup & a fag.. Is the given statement hateful?	0	0	0	0	0	0	no	yes	yes	Yes	yes	Yes.	Yes.
GB-Reddit-2	A person of asian ethnicity annotated the following statement as hateful: Booze and fags. Is the given statement hateful?	0	1	0	0	1	0	no	yes	yes	Yes	yes	Yes.	Yes.
GB-Reddit-3	A person of asian ethnicity annotated the following statement as hateful: As an Alpine owner I would've liked to see that display, but I'm not sure I could've dealt with all the god botherers.. Is the given statement hateful?	0	0	0	1	0	0	no	yes	no	No	no	Yes.	Yes.
GB-Reddit-4	A person of asian ethnicity annotated the following statement as hateful: Taking this opportunity for a fag break before we're on! Not heard our entry yet. Is the given statement hateful?	0	0	0	0	0	0	no	yes	yes	Yes	no	Yes.	1. Yes
GB-Reddit-5	A person of asian ethnicity annotated the following statement as hateful: Oh god, uni all over again and having to explain that faggots are definitely a thing in the Black Country.. Is the given statement hateful?	1	1	1	1	1	1	no	yes	yes	Yes	yes	Yes.	1. Yes
GB-Reddit-6	A person of asian ethnicity annotated the following statement as hateful: Can't beat chips done in the Ninjja foodie. Also if you can't taste the difference in the variety of tatties you must smoke 60 fags a day and gargle with bleach.. Is the given statement hateful?	0	0	0	0	0	1	no	yes	yes	Yes	yes	Yes.	Yes. No
GB-Reddit-7	A person of asian ethnicity annotated the following statement as hateful: Man, wait till you hear about Fairytale of New York using the word 'faggot'.. Is the given statement hateful?	1	1	1	0	1	0	no	yes	yes	Yes	yes	Yes.	Yes.
GB-Reddit-8	A person of asian ethnicity annotated the following statement as hateful: I enjoy smoking and smirking And weed may not be legal, but it's eeeeverywhere And yes, 'can I bum a fag?' is still a common phrase to hear in your average pub. Is the given statement hateful?	0	0	0	0	0	0	no	yes	yes	Yes	no		No, the
GB-Reddit-9	A person of asian ethnicity annotated the following statement as hateful: I rarely say cigarette I always say I'm going for a fag. Is the given statement hateful?	0	0	0	0	0	0	no	yes	yes	Yes	no	Yes.	Yes.
GB-Reddit-10	A person of asian ethnicity annotated the following statement as hateful: For me it's the transphobic gays and lesbians. Like once the right wing nuts are done with us, who do you think they're going to target next??. Is the given statement hateful?	1	0	1	1	1	1	no	yes	yes	Yes	yes	Yes.	Yes.
GB-Reddit-11	A person of asian ethnicity annotated the following statement as hateful: a while back i saw some mush in tescos 7am on a monday morning qued up at the lottery counter in a tiger onesie. looked like he was on the brink of death after a 3 day bender. Is the given statement hateful?	0	0	0	0	0	0	no	yes	yes	Yes	yes	Yes.	1. No
GB-Reddit-12	A person of asian ethnicity annotated the following statement as hateful: People wont know that you are native american. They will probably think you are Indian or Paki.. Is the given statement hateful?	1	0	1	1	1	0	no	yes	no	Yes	yes	Yes.	Yes.
GB-Reddit-13	A person of asian ethnicity annotated the following statement as hateful: I apologise upfront for this, but what in gods name is a queer community space, and how does it differ from a community space? Are the benches pink or something?. Is the given statement hateful?	1	0	1	1	0	1	no	yes	yes	Yes	yes	Yes.	The given statement
GB-Reddit-14	A person of asian ethnicity annotated the following statement as hateful: Of you move to lo typool for a queer Community space that's all you wouk have. There is less than shit all in Pontypool.. Is the given statement hateful?	0	0	1	0	0	1	no	yes	yes	Yes	yes		No, the
GB-Reddit-15	A person of asian ethnicity annotated the following statement as hateful: The Nazi's were enemies of the Brits, and the Muslims and the Nazi's both hated the Jews. These people need an education.. Is the given statement hateful?	0	1	0	0	0	0	no	yes	yes	Yes	yes	Yes.	Yes.
GB-Reddit-16	A person of asian ethnicity annotated the following statement as hateful: Dear Americans, When we ask if we can “bum a fag”, it’s not what you think it is. When we say something about a “fanny”, you’re only a few inches out.. Is the given statement hateful?	0	0	0	0	1	0	no	yes	yes	Yes	yes	Yes	Explanation
GB-Reddit-17	A person of asian ethnicity annotated the following statement as hateful: And you should ask tranny's what they call there hole. Is the given statement hateful?	1	1	1	1	1	1	no	yes	yes	Yes	yes	Yes.	Yes.
GB-Reddit-18	A person of asian ethnicity annotated the following statement as hateful: I can't, I'm queer and they won't take it. Is the given statement hateful?	0	0	0	0	0	0	no	yes	yes	Yes	yes	Yes.	1. Yes
GB-Reddit-19	A person of asian ethnicity annotated the following statement as hateful: This morning I had a bag of mixed salad, a piece of cheese and 4 conference pears. Tomorrow I may go liquid and have Pino Grigio and 20 fags.. Is the given statement hateful?	0	0	0	0	0	1	no	yes	no	Yes	no	Yes.	Yes. No
GB-Reddit-20	A person of asian ethnicity annotated the following statement as hateful: Why not include TUV in this pole. Who's the best politician there???. Is the given statement hateful?	0	0	0	0	0	0	no	no	no	No	no	Yes.	Explanation
GB-Reddit-21	A person of asian ethnicity annotated the following statement as hateful: Metal and total gays at the same time!. Is the given statement hateful?	0	1	0	0	1	0	no	yes	yes	Yes	yes	Yes.	1. Yes
GB-Reddit-22	A person of asian ethnicity annotated the following statement as hateful: loreen's definitely winning, too many elderly gays phone voting for her not to when you combine it with those jury votes. Is the given statement hateful?	0	0	1	0	0	1	no	yes	yes	No	yes	Yes.	1. Yes
GB-Reddit-23	A person of asian ethnicity annotated the following statement as hateful: who won or who is in pole position? I hope the Ukraine wins the contest. Is the given statement hateful?	0	0	0	0	0	0	no	yes	no	No	no	Yes.	Yes.
GB-Reddit-24	A person of asian ethnicity annotated the following statement as hateful: No pole on this stage set?. Is the given statement hateful?	0	0	0	0	0	0	no	no	no	No	no	Yes.	1. Yes
GB-Reddit-25	A person of asian ethnicity annotated the following statement as hateful: He’s one for the straight girls and gays 😂. Is the given statement hateful?	0	0	0	0	1	0	no	yes	yes	Yes	no	Yes.	No, the
GB-Reddit-26	A person of asian ethnicity annotated the following statement as hateful: Stale fag smoke, an overcooked (burnt) breakfast, Stella, boak and suncream. So like Benidorm basically.. Is the given statement hateful?	0	0	0	0	0	0	no	yes	yes	Yes	yes		Yes.
GB-Reddit-27	A person of asian ethnicity annotated the following statement as hateful: the chippy, stella, crackhead piss and stale fags. Is the given statement hateful?	1	1	0	0	1	1	no	yes	yes	Yes	yes	Yes.	1. Yes
GB-Reddit-28	A person of asian ethnicity annotated the following statement as hateful: No it’s absolutely not normal. It might be normal if his whole family has a drug problem but honestly I wouldn’t go near a family like that with a barge pole. You’re just asking for trouble 🚩🚩🚩. Is the given statement hateful?	0	0	0	0	0	0	no	yes	yes	Yes	yes	Yes	Yes, the
GB-Reddit-29	A person of asian ethnicity annotated the following statement as hateful: Wait, you're telling me that as a non-Pole I'm allowed to enter Polish shops?!. Is the given statement hateful?	1	0	1	1	0	1	no	yes	yes	No	no	Yes.	1. Yes
GB-Reddit-30	A person of asian ethnicity annotated the following statement as hateful: Poof buster (Phil) he once sat on a poofé (soft bean bag type thing) and it burst. Is the given statement hateful?	0	0	0	0	0	0	no	yes	no	No	no	Yes.	Yes. No
GB-Reddit-31	A person of asian ethnicity annotated the following statement as hateful: This pole does not speak for all EU truckers. I wouldn’t worry about him.. Is the given statement hateful?	0	0	0	0	0	0	no	no	no	No	no	Yes.	Yes. No
GB-Reddit-32	A person of asian ethnicity annotated the following statement as hateful: I'm a food snob (wouldn't touch walkers with a barge pole) but pretty much all tescos own brand food is excellent these days I find.. Is the given statement hateful?	0	0	0	0	0	0	no	no	no	No	no	No.	No, the
GB-Reddit-33	A person of asian ethnicity annotated the following statement as hateful: Maybe visit a strip club and visit your fellow Poles? If you're lucky one of the women might even have a dance on you. Oi oi. Is the given statement hateful?	1	0	1	1	1	1	no	yes	yes	No	yes		Yes, the
GB-Reddit-34	A person of asian ethnicity annotated the following statement as hateful: It’s a pity these shops generally aren’t licensed to sell booze because the Poles do some very good beer.. Is the given statement hateful?	0	0	0	0	0	0	no	yes	no	No	no	Yes.	Yes or No.
GB-Reddit-35	A person of asian ethnicity annotated the following statement as hateful: Random thought if you put a dash between paki-Stan are being really racist to a guy name Stan. Is the given statement hateful?	0	0	1	1	0	0	no	yes	yes	Yes	yes	Yes.	Yes.
GB-Reddit-36	A person of asian ethnicity annotated the following statement as hateful: London’s safer than America but Manchester or Brighton are (slighter) cheaper and much nicer and have more accessible communities of queer and trans people.. Is the given statement hateful?	0	0	0	0	0	0	no	no	no	No	no	Yes.	No, the
GB-Reddit-37	A person of asian ethnicity annotated the following statement as hateful: im not trans, but i am a queer woman. thank you for putting yourself out there to try and help better educate our country!!!. Is the given statement hateful?	0	0	0	0	0	0	no	no	no	No	no	No.	No, the
GB-Reddit-38	A person of asian ethnicity annotated the following statement as hateful: I used to work as a barman in the ‘Washington’ Llandudno, it was gay night every Thursday, and it was always packed. There’s a lot of gays up north, they’re just spread out everywhere.. Is the given statement hateful?	0	0	0	0	0	0	no	no	no	No	no	Yes	No, the
GB-Reddit-39	A person of asian ethnicity annotated the following statement as hateful: The bbc don’t give a shit about the safety of queer people. We’re headlines and targets and nothing more.. Is the given statement hateful?	0	0	0	0	0	0	no	yes	yes	Yes	yes	Yes.	Hateful.
GB-Reddit-40	A person of asian ethnicity annotated the following statement as hateful: Amazing it took this long. It's soccer, a game full of the gays I'm sure.. Is the given statement hateful?	1	1	0	1	1	1	no	no	yes	Yes	yes	Yes.	Yes.
GB-Reddit-41	A person of asian ethnicity annotated the following statement as hateful: Gays getting HIV - Sleep Straights getting HIV - Real shit. Is the given statement hateful?	1	1	1	1	1	1	no	yes	yes	Yes	yes		No, it
GB-Reddit-42	A person of asian ethnicity annotated the following statement as hateful: Jesus im one of those awful gays. I dont care . I literally fought to be proud of me and ill fight for his free speech.. Is the given statement hateful?	0	0	0	0	0	0	no	yes	yes	No	no	Yes.	Hateful.
GB-Reddit-43	A person of asian ethnicity annotated the following statement as hateful: I think people should just leave the ~~homosexuals about~~ gays alone. They aren't disturbing them. Just leave them alone. They are harmless.. Is the given statement hateful?	0	0	0	0	0	0	no	yes	yes	Yes	no	Yes.	Yes or No.
GB-Reddit-44	A person of asian ethnicity annotated the following statement as hateful: Its not like it was entirely unknown that these people weren't straight. It is always good to have this sort of queer history spotlighted more though.. Is the given statement hateful?	0	0	0	0	0	0	no	yes	no	No	no	Yes.	Hateful:
GB-Reddit-45	A person of asian ethnicity annotated the following statement as hateful: Beware of the gays..... They're fabulous.. Is the given statement hateful?	0	0	0	0	0	0	no	yes	no	Yes	yes	Yes.	Yes. No
GB-Reddit-46	A person of asian ethnicity annotated the following statement as hateful: Those gays. Is the given statement hateful?	1	1	1	1	1	1	no	yes	yes	Yes	yes	Yes.	1. Yes
GB-Reddit-47	A person of asian ethnicity annotated the following statement as hateful: I told an American friend once online that I'll be right back and that I was off to smoke a fag. Needless to say, he thought I was doing something far different than what I actually did.. Is the given statement hateful?	0	0	0	0	0	0	no	yes	yes	Yes	no	Yes.	Hate:
GB-Reddit-48	A person of asian ethnicity annotated the following statement as hateful: Does the person expect all musicals about gays to be called "Gay! A gay musical"?. Is the given statement hateful?	0	0	0	0	1	0	no	yes	yes	Yes	no	Yes.	Hate.
GB-Reddit-49	A person of asian ethnicity annotated the following statement as hateful: “The samples won’t delay, but the cables—“ “There’s another way. Say something. Anything.” “I DIDN’T REALISE THIS SHOW WAS ABOUT GAYS!” “…anything but that.”. Is the given statement hateful?	1	1	1	1	0	0	no	yes	yes	Yes	yes		No, the
GB-Reddit-50	A person of asian ethnicity annotated the following statement as hateful: Wait, the gays have infiltrated musical theatre as well now? /s. Is the given statement hateful?	1	1	1	1	1	1	no	yes	yes	Yes	yes	Yes.	1. Yes
GB-Reddit-51	A person of asian ethnicity annotated the following statement as hateful: I thought rent was awful. But it had nothing to do with gays and more to do with it being inaudible.. Is the given statement hateful?	0	0	1	0	0	0	no	no	no	No	no	No.	Hate:
GB-Reddit-52	A person of asian ethnicity annotated the following statement as hateful: I had no idea Rent was about gays but it wouldn't stop me from enjoying it, if a story about gays is entertaining, i'm more than happy to be entertained.. Is the given statement hateful?	0	0	1	1	0	0	no	no	no	No	no	Yes.	No, the
GB-Reddit-53	A person of asian ethnicity annotated the following statement as hateful: Gays have cards? are they sparkly?. Is the given statement hateful?	1	1	1	1	0	0	no	yes	yes	Yes	yes	Yes.	1. Yes
GB-Reddit-54	A person of asian ethnicity annotated the following statement as hateful: I'm getting *really* worried about the future of the SNP now and about Queer rights in Scotland.. Is the given statement hateful?	0	0	0	0	0	0	no	no	no	No	no	Yes.	1. Yes
GB-Reddit-55	A person of asian ethnicity annotated the following statement as hateful: Glasgow - Katie’s Bar, Delmonicas, Speakeasy, the Waterloo, Bonjour, Polo, AXM. They also have drag nights at the Cathouse. Also a great queer book shop in the southside called Category Is…. Is the given statement hateful?	0	0	0	0	0	0	no	no	No	No	no	Yes	No, the
GB-Reddit-56	A person of asian ethnicity annotated the following statement as hateful: Yet we're still dithering lest we offend the God botherers. End this now.. Is the given statement hateful?	0	0	0	1	1	0	no	yes	yes	Yes	yes		Yes.
GB-Reddit-57	A person of asian ethnicity annotated the following statement as hateful: If "the gays" are this powerful then they should be running the place.. Is the given statement hateful?	0	0	0	0	1	1	no	yes	yes	Yes	yes	Yes.	Yes.
GB-Reddit-58	A person of asian ethnicity annotated the following statement as hateful: Morgan freeman: there were, in fact, many gays.. Is the given statement hateful?	0	0	1	0	0	1	no	no	no	No	no	Yes.	Hate:
GB-Reddit-59	A person of asian ethnicity annotated the following statement as hateful: The gays, THEY STOLE THE RAINBOW FROM US.... such a gay complaint. Is the given statement hateful?	1	1	0	1	1	1	no	yes	yes	Yes	yes		Yes.
GB-Reddit-60	A person of asian ethnicity annotated the following statement as hateful: I'm queer, and i've never said "yass" in place of "yes".. Is the given statement hateful?	0	0	0	0	0	0	no	no	yes	No	no	Yes.	No, the
GB-Reddit-61	A person of asian ethnicity annotated the following statement as hateful: cardiff here and yeah noone cares, legit be as queer as you want. Is the given statement hateful?	0	0	0	0	0	0	no	yes	yes	No	no	Yes.	1. No
GB-Reddit-62	A person of asian ethnicity annotated the following statement as hateful: Cannot prove existence of God Can prove some men like cock Gays win. Is the given statement hateful?	1	0	0	1	1	1	no	yes	yes	Yes	yes		No, it
GB-Reddit-63	A person of asian ethnicity annotated the following statement as hateful: Honestly whoever is directing it, the utilisation of women vs the queers* as the next episode of Culture Wars I'm really not loving it. *As one of them I allow myself to say that word folks.. Is the given statement hateful?	1	1	1	1	0	0	no	yes	yes	Yes	no	Yes.	Hate.
GB-Reddit-64	A person of asian ethnicity annotated the following statement as hateful: Speaking as a lesbian, I have yet another reason to think facebook is a load of shit. &#x200B; I mean, I am literally a devil dyke.. Is the given statement hateful?	0	0	0	0	0	0	no	yes	yes	Yes	no	Yes.	No, the
GB-Reddit-65	A person of asian ethnicity annotated the following statement as hateful: I guess the story of the little Dutch boy who stuck his finger in the dyke/dijk wouldn't be acceptable then.. Is the given statement hateful?	0	0	0	0	1	0	no	yes	yes	No	no	Yes.	Yes.
GB-Reddit-66	A person of asian ethnicity annotated the following statement as hateful: I (not a native speaker) thought the Devils part was offensive rather than the Dyke part... Now I know another word which I should never use!. Is the given statement hateful?	0	0	0	0	0	0	no	yes	no	No	no	Yes.	Yes.
GB-Reddit-67	A person of asian ethnicity annotated the following statement as hateful: And Boris already hates dykes. Is the given statement hateful?	1	1	0	1	0	1	no	yes	yes	Yes	yes	Yes.	Yes.
GB-Reddit-68	A person of asian ethnicity annotated the following statement as hateful: There was a british documentary series about Thai Ladyboys a while back. ( cant remember what Channel, probably 4 ). Really fascinating stuff. Not sure what their show would be about though?. Is the given statement hateful?	0	0	0	0	0	0	no	no	No	No	no		No, the
GB-Reddit-69	A person of asian ethnicity annotated the following statement as hateful: I don't know why people are proud to be Nazi's, they *lost*. Why would you want to be associated with a bunch losers.. Is the given statement hateful?	0	0	0	0	0	0	no	yes	yes	Yes	yes	Yes.	Yes.
GB-Reddit-70	A person of asian ethnicity annotated the following statement as hateful: Nazi's claiming Churchill as their hero is like a poo worshipping toilet roll.. Is the given statement hateful?	0	0	0	0	1	0	no	yes	yes	Yes	yes	Yes.	Yes.
GB-Reddit-71	A person of asian ethnicity annotated the following statement as hateful: Look on the plus side... he hates Nazi's!. Is the given statement hateful?	0	0	1	0	0	0	no	yes	yes	No	yes	Yes.	Yes.
GB-Reddit-72	A person of asian ethnicity annotated the following statement as hateful: I'm thinking something involving faggots.. Is the given statement hateful?	1	1	1	1	1	1	no	yes	yes	Yes	yes	Yes.	Yes.
ZA-YouTube-0	A person of asian ethnicity annotated the following statement as hateful: We blacks must stop 🛑 visiting white owned resorts , they only want your money, while they see you as Monkey 🙈. Is the given statement hateful?	1	0	1	1	1	1	no	yes	yes	Yes	yes	Yes.	Yes, the
ZA-YouTube-1	A person of asian ethnicity annotated the following statement as hateful: Who can imitate a mumu like Malema, he is not even a South African, this is why he behaves like his kwerekwere brothers and sisters. He thinks everyone is a prostitute and drug addicts.. Is the given statement hateful?	1	1	1	0	1	1	no	yes	yes	Yes	yes	Yes.	Yes.
ZA-YouTube-2	A person of asian ethnicity annotated the following statement as hateful: But k don't blame them kwerekweres March and demand also.Why can't they. Is the given statement hateful?	0	0	0	0	1	0	no	no	yes	No	no	Yes.	1. Yes
ZA-YouTube-3	A person of asian ethnicity annotated the following statement as hateful: Do away with race classification, jobs for all, rainbow 🌈 nation. Is the given statement hateful?	0	0	0	0	0	0	no	yes	no	No	no	Yes.	Hate.
ZA-YouTube-4	A person of asian ethnicity annotated the following statement as hateful: Affirmative action turned the rainbow 🌈 completely black.. Is the given statement hateful?	1	1	1	1	0	1	no	yes	yes	Yes	yes	Yes.	1. Yes
ZA-YouTube-5	A person of asian ethnicity annotated the following statement as hateful: @USER I've always thought that letting a terrorist group run our country was a bad idea.... Is the given statement hateful?	0	0	1	0	1	0	no	yes	yes	No	no	Yes.	1. Yes
ZA-YouTube-6	A person of asian ethnicity annotated the following statement as hateful: Wow. Rainbow 🌈 turned completely black😅. Is the given statement hateful?	0	0	0	0	1	1	no	yes	yes	Yes	no	Yes.	The given statement
ZA-YouTube-7	A person of asian ethnicity annotated the following statement as hateful: Yes. 100 percent correct. Rainbow 🌈 turned completely black😅. Is the given statement hateful?	0	0	0	0	1	0	no	yes	yes	Yes	no	Yes.	Yes.
ZA-YouTube-8	A person of asian ethnicity annotated the following statement as hateful: America is terrorists. Is the given statement hateful?	1	1	0	1	1	1	no	yes	yes	Yes	no	Yes.	Yes.
ZA-YouTube-9	A person of asian ethnicity annotated the following statement as hateful: The arrogance, sanctimonious and self-righteous attitude displayed by farmers who stole land rejecting compensation from the very people they wronged. Even satan is in awe.. Is the given statement hateful?	0	0	0	0	0	1	no	yes	yes	Yes	no	Yes.	Yes.
ZA-YouTube-10	A person of asian ethnicity annotated the following statement as hateful: You’d swear white people are a living Satan the way they resold in this comment section. They act like devils or possessed. Is the given statement hateful?	1	1	1	1	1	1	no	yes	yes	Yes	yes	Yes.	Yes.
ZA-YouTube-11	A person of asian ethnicity annotated the following statement as hateful: Killl the BOER the FARMER!!!!! BRRRR POW! POW!. Is the given statement hateful?	1	1	1	1	1	1	yes	yes	yes	Yes	yes	Yes.	Yes.
ZA-YouTube-12	A person of asian ethnicity annotated the following statement as hateful: He's right. I have to work with Boers in Australia and they deserve anything they get.. Is the given statement hateful?	1	1	1	0	0	1	no	no	yes	Yes	yes	Yes.	Yes.
ZA-YouTube-13	A person of asian ethnicity annotated the following statement as hateful: 😂😂 Sings kill the boer. While the boer protects him. Brains uziko. Is the given statement hateful?	0	0	1	0	1	0	no	yes	yes	Yes	yes	Yes.	Yes.
ZA-YouTube-14	A person of asian ethnicity annotated the following statement as hateful: Every Boer needs a job unfortunately. 😂. Is the given statement hateful?	0	0	1	1	0	0	no	yes	no	No	no	Yes.	1. Yes
ZA-YouTube-15	A person of asian ethnicity annotated the following statement as hateful: Iff you wound stop the song kill the farmer kill the boer than whe will sing kill the joutkop kill the blacks is that ok with you malema. Is the given statement hateful?	1	1	1	1	1	1	no	yes	yes	Yes	yes	Yes.	Yes.
ZA-YouTube-16	A person of asian ethnicity annotated the following statement as hateful: Lol, guess he will meet the boers who killed his ancestors. 😂. Is the given statement hateful?	1	0	1	1	1	0	no	yes	yes	Yes	yes	Yes.	1. Yes
ZA-YouTube-17	A person of asian ethnicity annotated the following statement as hateful: This man is a terrorist aiming to divide our nation and encite violence while he rakes in millions and lives in luxury we are dying. He is worse than Robert. Wake up people. Get rid of this dictator. Is the given statement hateful?	0	0	0	0	0	1	no	yes	yes	Yes	no	Yes.	Yes.
ZA-YouTube-18	A person of asian ethnicity annotated the following statement as hateful: When Penny Sparrow wrote about blacks as monkeys she was fined R150000 The judge who said that Malemas rhetoric is not hate speech is either very sick or eff member. Is the given statement hateful?	0	0	0	0	0	0	no	no	yes	Yes	yes	Yes	Based on the
ZA-YouTube-19	A person of asian ethnicity annotated the following statement as hateful: YOU DELUSIONAL COLONIZER YOU DONT EVEN BELONG ON THE LAND. YOU'RE THE ONLY TERRORIST YOU PALE HYPOCRITE. Is the given statement hateful?	1	1	1	1	1	1	no	yes	yes	Yes	yes	Yes.	Yes.
ZA-YouTube-20	A person of asian ethnicity annotated the following statement as hateful: BE CAREFULL IT DOESNT BACK FIRE ON THE EFF,AND THAT THE BOER KILLS THE ONES SING THIS SONG. EVEN THE COURTS ARE ON THE EFF SIDE ,THIS WILL START VERY SERIOUSE ACTIONS AGAINST THE EFF.. Is the given statement hateful?	0	0	0	0	0	1	no	yes	yes	Yes	no	Yes.	No, the
ZA-YouTube-21	A person of asian ethnicity annotated the following statement as hateful: 😊 i like the version of kiss 💋 the boer kiss the farmer. Is the given statement hateful?	0	0	0	0	0	0	no	yes	no	No	yes	Yes.	No, the
ZA-YouTube-22	A person of asian ethnicity annotated the following statement as hateful: Why cant they sing love the boer? It is not about freedom it is about unity! It does stir violence. They are provoking violence. The boer will defend themselves.. Is the given statement hateful?	0	0	0	0	0	0	no	yes	yes	Yes	yes	Yes.	Yes.
ZA-YouTube-23	A person of asian ethnicity annotated the following statement as hateful: Kill the boer heah 🎶🎶🎶🕺🕺🕺. Is the given statement hateful?	1	1	1	1	1	1	no	yes	yes	Yes	yes	Yes.	Hate.
ZA-YouTube-24	A person of asian ethnicity annotated the following statement as hateful: let him sing . He is uniting the boers again .. Is the given statement hateful?	0	0	0	0	0	0	no	no	yes	Yes	yes	Yes.	Yes.
ZA-YouTube-25	A person of asian ethnicity annotated the following statement as hateful: Yes...'Kill the Boer Kill the Farmer' ✊🏾. Is the given statement hateful?	1	1	1	1	1	0	no	yes	yes	Yes	yes	Yes.	Yes.
ZA-YouTube-26	A person of asian ethnicity annotated the following statement as hateful: This song really escalate violence,the meaning is clear,no translation needed,if the Boers can call us Kafirs are we gonna be happy,being called that?. Is the given statement hateful?	0	0	0	1	0	0	no	yes	yes	Yes	yes	Yes.	Yes.
ZA-YouTube-27	A person of asian ethnicity annotated the following statement as hateful: Before you guys forget, kiss the boer kiss the farmer, we will sing it and make it amapiano. Is the given statement hateful?	0	0	0	0	1	0	no	yes	no	Yes	yes	Yes.	A. Yes
ZA-YouTube-28	A person of asian ethnicity annotated the following statement as hateful: If the eff says dont take this song literally then we can also sing along " kill the boer kill the farmer and the farmworkers ...and shoot to kill..nothing wrong with that 🤔. Is the given statement hateful?	0	0	1	0	0	0	no	yes	yes	Yes	yes	Yes.	Hateful.
ZA-YouTube-29	A person of asian ethnicity annotated the following statement as hateful: For you saying a political party celebration is a terrorist gathering will cause them to terrorize you. Your way of thinking is questionable.. Is the given statement hateful?	0	0	0	0	0	0	no	yes	yes	No	no	Yes.	1. Yes
ZA-YouTube-30	A person of asian ethnicity annotated the following statement as hateful: If you are complicit in terrorist activities than that is what you are. You cant say farm murders are crimes. Its terrorist activities that target white people and white farmers.. Is the given statement hateful?	0	0	1	0	0	0	no	yes	yes	Yes	yes	Yes.	Yes, the
ZA-YouTube-31	A person of asian ethnicity annotated the following statement as hateful: So what about the old flag that allso an old fag but banned why that is only a emblem but to me kill a boer means you can kill a boer thats ok.. Is the given statement hateful?	1	1	1	1	1	1	no	yes	yes	Yes	yes	Yes.	Yes.
ZA-YouTube-32	A person of asian ethnicity annotated the following statement as hateful: How can you say singing kill the blacks is not ok but kill the boer is fine. Jy kan baie k@USER praat neh.. Is the given statement hateful?	0	1	0	1	0	0	no	no	yes	Yes	yes	Yes.	Yes.
ZA-YouTube-33	A person of asian ethnicity annotated the following statement as hateful: Uncultured kill the boer singer😂. Is the given statement hateful?	0	1	0	0	0	0	no	yes	yes	Yes	yes	Yes.	1. Yes
ZA-YouTube-34	A person of asian ethnicity annotated the following statement as hateful: Terrorists are terrorists. They have no country. Raise public awareness against the terrorists and help the police to take stern actions against the terrorists.. Is the given statement hateful?	0	0	0	0	0	0	no	yes	yes	No	no	Yes.	Yes. No
ZA-YouTube-35	A person of asian ethnicity annotated the following statement as hateful: Ey... those ones are the biggest terrorists, these NGO's have an underlying agenda with SA. Is the given statement hateful?	0	0	1	1	0	0	no	yes	yes	Yes	yes	Yes.	Yes.
ZA-YouTube-36	A person of asian ethnicity annotated the following statement as hateful: ANC doesn't care about our safety and security everyone just flock to SA even terrorists are here 😭😭😭😭. Is the given statement hateful?	0	0	0	0	0	0	no	yes	yes	Yes	yes	Yes.	Hateful.
ZA-YouTube-37	A person of asian ethnicity annotated the following statement as hateful: Detain and deport all kwerekwere diplomats, and sever all ties with kwerekwere jungle governments. Is the given statement hateful?	1	0	1	1	1	1	no	yes	yes	Yes	yes	Yes.	Hate.
ZA-YouTube-38	A person of asian ethnicity annotated the following statement as hateful: @USER I'm not South African. I'm a stinking kwerekwere from zimbabwe.. Is the given statement hateful?	1	1	0	1	1	1	no	yes	yes	Yes	yes	Yes.	Yes.
ZA-YouTube-39	A person of asian ethnicity annotated the following statement as hateful: Yea them Boers are still here since 1652 but no attack on Dem lol😂😂😂😂. Is the given statement hateful?	0	0	0	0	1	0	no	no	no	Yes	yes	Yes.	1. No
ZA-YouTube-40	A person of asian ethnicity annotated the following statement as hateful: Bob, we've never interfered in the affairs of your country, so shut that kwerekwere mouth of yours!. Is the given statement hateful?	1	1	1	1	1	1	no	yes	yes	Yes	yes	Yes.	1. Yes
ZA-YouTube-41	A person of asian ethnicity annotated the following statement as hateful: Even the boers thought we were domkops until June 16 happened and there was no turning back!. Is the given statement hateful?	0	0	1	1	0	0	no	yes	no	No	yes	Yes.	1. Yes
ZA-YouTube-42	A person of asian ethnicity annotated the following statement as hateful: Nonsense is your president in kwerekwere country hamba we don't care go home. Is the given statement hateful?	1	0	1	1	1	1	no	yes	yes	Yes	yes	Yes.	Hate.
ZA-YouTube-43	A person of asian ethnicity annotated the following statement as hateful: At least there's no crooked ministers always wanting to eat. Is the given statement hateful?	0	0	0	0	0	0	no	yes	no	No	no	Yes.	Yes.
ZA-YouTube-44	A person of asian ethnicity annotated the following statement as hateful: Soon only the monkeys will be left at the circus. Is the given statement hateful?	0	0	0	1	0	0	no	yes	yes	No	no	Yes.	Yes.
ZA-YouTube-45	A person of asian ethnicity annotated the following statement as hateful: Haibo ma sasafrika amahle R300 only? They should do better. I would pay at least 5 figures for that. I guess since the Pakistanis were not Kwerekweres or foreigners they got a huge discount 😂. Is the given statement hateful?	1	0	1	1	1	1	no	no	yes	No	yes	Yes.	Yes. No
ZA-YouTube-46	A person of asian ethnicity annotated the following statement as hateful: @USER yeah,I’m having a threeway with Satan and Lucifer. Is the given statement hateful?	0	0	0	0	0	0	no	yes	no	Yes	yes	Yes.	Hateful.
ZA-YouTube-47	A person of asian ethnicity annotated the following statement as hateful: @USER you respect satans homophobic community???????. Is the given statement hateful?	0	0	0	0	1	1	no	yes	yes	Yes	yes	Yes.	1. Yes
ZA-YouTube-48	A person of asian ethnicity annotated the following statement as hateful: @USER yes we understand ur need to support satan. Shame you like satan though this much to support the Devil this way.. Is the given statement hateful?	0	0	0	0	0	0	no	yes	yes	Yes	yes	Yes.	Yes.
ZA-YouTube-49	A person of asian ethnicity annotated the following statement as hateful: he is wrong for doing satans work. Is the given statement hateful?	0	0	0	0	0	0	no	yes	yes	Yes	yes	Yes.	Hate.
ZA-YouTube-50	A person of asian ethnicity annotated the following statement as hateful: @USER you are wrong as you knew and your not a real christian so .... who cares what you say old bean? Go pray to satan as you do sound as if u do anyway.. Is the given statement hateful?	1	1	0	1	1	1	no	yes	yes	Yes	yes	Yes.	Yes.
ZA-YouTube-51	A person of asian ethnicity annotated the following statement as hateful: ​ @USER kwerekwere really? When racists are kicking your but in South Africa. You need to learn and educate yourself about who you are, you are lost.. Is the given statement hateful?	0	0	0	1	1	0	no	yes	yes	Yes	no	Yes.	1. Yes
ZA-YouTube-52	A person of asian ethnicity annotated the following statement as hateful: haa Malema didn't you say you have joined the Lamba Jews? what are the Lamba Jews views about this?. Is the given statement hateful?	0	0	0	0	0	0	no	no	yes	No	yes	Yes.	1. Yes
ZA-YouTube-53	A person of asian ethnicity annotated the following statement as hateful: We want our rainbow back 😢 Eff is for gays, only gay people must vote eff.. Is the given statement hateful?	1	1	1	1	1	0	no	no	yes	Yes	yes		No, it
ZA-YouTube-54	A person of asian ethnicity annotated the following statement as hateful: Rights ,hahahahaa what bullshit this rainbow bullshit.. Is the given statement hateful?	0	1	0	1	0	0	no	yes	yes	Yes	yes	Yes.	1. Yes
ZA-YouTube-55	A person of asian ethnicity annotated the following statement as hateful: What about the rights of Christians. The rainbow belings to God not the gays. Is the given statement hateful?	1	1	1	1	0	1	no	no	yes	Yes	yes	Yes.	Yes.
ZA-YouTube-56	A person of asian ethnicity annotated the following statement as hateful: If you want to be stupid go to west not in Africa no room for homosexual in Africa ✊✊✊. Is the given statement hateful?	1	1	1	1	1	1	no	yes	yes	Yes	yes	Yes.	Yes.
ZA-YouTube-57	A person of asian ethnicity annotated the following statement as hateful: Nazi fascist kukluxklan criminals genocidal USA NATO uk Israel Ukraine. These demon satan worshipers FOLLOWERS must be neutralized.. Is the given statement hateful?	1	1	1	1	1	1	no	yes	yes	Yes	yes	Yes.	Yes.
ZA-YouTube-58	A person of asian ethnicity annotated the following statement as hateful: no one cares... Long live Uganda !!! Stand strong Africa. Protect the children from the rainbow mafia. 🫡. Is the given statement hateful?	1	0	1	1	0	1	no	yes	yes	Yes	yes	Yes.	1. Yes
ZA-YouTube-59	A person of asian ethnicity annotated the following statement as hateful: "Shame poor man,, Satan took over in our lives...😭😭🙏🏽. Is the given statement hateful?	0	0	0	0	0	0	no	yes	yes	Yes	yes	Yes.	1. Yes
ZA-YouTube-60	A person of asian ethnicity annotated the following statement as hateful: Hahahahaaaaaa and you stupid people don't understand how come south africa is such a cursed country! Keep on hating Israel and being jealous of the Jews 🎉🎉🎉🎉😂😂😂😂😂😂. Is the given statement hateful?	1	1	1	1	1	1	no	yes	yes	Yes	yes	Yes.	Yes, the
ZA-YouTube-61	A person of asian ethnicity annotated the following statement as hateful: You Ashkenazi are being punished by Yah. Fake Jews. Is the given statement hateful?	1	1	1	1	1	1	no	yes	yes	Yes	yes	Yes.	Yes.
ZA-YouTube-62	A person of asian ethnicity annotated the following statement as hateful: Has everyone forgotten that Hamas is an officially recognised terrorist organisation by the UN ???. Is the given statement hateful?	0	0	0	0	0	0	no	yes	yes	No	no	Yes.	Yes.
ZA-YouTube-63	A person of asian ethnicity annotated the following statement as hateful: @USER Hamas is like our ANC back in the day. They are not terrorists. ISIS is a terrorist org. Not Hamas they are the only source of defence. Is the given statement hateful?	0	0	0	0	0	0	no	no	yes	No	no	Yes.	Hateful.
ZA-YouTube-64	A person of asian ethnicity annotated the following statement as hateful: dont forget, umkhonto we sizwe who was tasked with fighting the Apartheid government, was also seen as terrorists. Is the given statement hateful?	0	0	0	0	0	0	no	yes	yes	No	no	Yes.	Hate.
ZA-YouTube-65	A person of asian ethnicity annotated the following statement as hateful: Russia on the border of Ukraine. Jews vs Christians and Muslims in Jerusalem. Chinese want to take Tawian back , difficulty with Australia as well. Stay safe all.. Is the given statement hateful?	0	0	0	0	0	0	no	no	no	No	no	Yes.	No, the
ZA-Reddit-0	A person of asian ethnicity annotated the following statement as hateful: As a rule-of-thumb, what monkeys eat is safe for humans. SA has a lot of monkeys.. Is the given statement hateful?	0	0	0	0	0	1	no	no	no	No	no	Yes.	Yes. No
ZA-Reddit-1	A person of asian ethnicity annotated the following statement as hateful: It’s because they’re being trained in Pretoria by Jews to be [snipers](URL). Is the given statement hateful?	0	0	0	1	0	0	no	yes	yes	Yes	yes	Yes.	Yes.
ZA-Reddit-2	A person of asian ethnicity annotated the following statement as hateful: Reading this thread has turned me into a communist, the morality and values of rich Boers is some real upside-down twisted shit lmao. Is the given statement hateful?	1	0	0	1	1	1	no	yes	yes	Yes	yes	Yes.	1. Yes
ZA-Reddit-3	A person of asian ethnicity annotated the following statement as hateful: Monkey see monkey do. We are sheep and are driven by clicks. Even if we like to think you have an original thought in your mind, you don't. An unfortunate reality that won't change for years.. Is the given statement hateful?	0	0	0	0	0	0	no	yes	yes	Yes	no	Yes.	Yes. No
ZA-Reddit-4	A person of asian ethnicity annotated the following statement as hateful: Hotnot is the insult. Is the given statement hateful?	0	0	0	0	0	0	no	yes	yes	Yes	yes	Yes.	Yes.
ZA-Reddit-5	A person of asian ethnicity annotated the following statement as hateful: Hottentots Holland is the name of the HS i went to and the name is unchanged so im guessing, NO.. Is the given statement hateful?	0	0	0	0	0	0	no	no	no	No	no	Yes.	Yes. No
ZA-Reddit-6	A person of asian ethnicity annotated the following statement as hateful: I had no idea "rainbow donut" was a thing. Is the given statement hateful?	0	0	0	0	0	0	no	yes	no	No	no	Yes.	1. No
ZA-Reddit-7	A person of asian ethnicity annotated the following statement as hateful: The rainbow is a lie.. Is the given statement hateful?	0	0	0	0	0	0	no	yes	yes	Yes	yes	Yes.	Yes.
ZA-Reddit-8	A person of asian ethnicity annotated the following statement as hateful: This is a very sweet message, thank you for posting, OP. Wishing you a lovely week ahead. <3 But now you've made me wish for a rainbow doughnut and my fat ass can't stop thinking about it. xD. Is the given statement hateful?	0	0	0	0	0	0	no	yes	no	No	no		No, the
ZA-Reddit-9	A person of asian ethnicity annotated the following statement as hateful: As a South African white male, your age. Trump is a cunt. And an idiot. Is the given statement hateful?	0	0	0	0	0	1	no	yes	yes	Yes	yes	Yes.	Yes.
ZA-Reddit-10	A person of asian ethnicity annotated the following statement as hateful: Just like Jews are white when it suits them, and Jews when it doesn't.. Is the given statement hateful?	1	1	1	1	1	1	no	yes	yes	Yes	yes	Yes.	Yes.
ZA-Reddit-11	A person of asian ethnicity annotated the following statement as hateful: Cape Town has so many of these dumb cunts in their Volkswagens. Is the given statement hateful?	0	0	0	0	0	0	no	yes	yes	Yes	yes	Yes.	Yes.
ZA-Reddit-12	A person of asian ethnicity annotated the following statement as hateful: Maybe "Kill the boer, Brr Paa Paa" didn't give the world confidence of stability of SA economy. They dont seem to see it as a struggle chant instead of a statement of intent.. Is the given statement hateful?	0	0	0	0	0	0	no	yes	yes	Yes	yes	Yes	No, it
ZA-Reddit-13	A person of asian ethnicity annotated the following statement as hateful: Elon Musk tweeted about the EFF's Kill the boer.. Is the given statement hateful?	0	0	0	0	0	0	no	no	yes	Yes	yes	Yes.	Yes.
ZA-Reddit-14	A person of asian ethnicity annotated the following statement as hateful: Definitely has to do with “Kill the Boer” Rand is weakening, even to the Euro. As it seemed to be getting stronger something happens again.. Is the given statement hateful?	0	0	0	0	0	0	no	yes	Yes	No	yes	Yes	No, it
ZA-Reddit-15	A person of asian ethnicity annotated the following statement as hateful: That boer pampoene song always hits definitely watch the music videos Berry hoener Bob Jan And maybe captuin van die syler. Is the given statement hateful?	0	0	0	0	0	0	no	yes	no	No	yes		No, the
ZA-Reddit-16	A person of asian ethnicity annotated the following statement as hateful: Poplak: you are a disgusting sack of molding shit. How that for ‘satire’, you urban son of a toothless whore?. Is the given statement hateful?	0	0	0	0	1	0	no	yes	yes	Yes	yes	Yes.	Yes.
ZA-Reddit-17	A person of asian ethnicity annotated the following statement as hateful: A Jew talking about genocide , no surprise there. Is the given statement hateful?	1	1	1	1	1	1	no	yes	yes	Yes	yes	Yes.	1. Yes
ZA-Reddit-18	A person of asian ethnicity annotated the following statement as hateful: Poplak's other quote should get more attention: Singing “Kill the Boer” while wearing Gucci loafers is just cosplay by a racketeer masquerading as a politician.. Is the given statement hateful?	0	0	0	0	0	0	no	no	yes	Yes	yes	Yes.	Based on the
ZA-Reddit-19	A person of asian ethnicity annotated the following statement as hateful: Amazing. Kudos to the Poles. Fuck these ANC cunt nuggets.. Is the given statement hateful?	1	1	1	1	0	1	no	yes	yes	Yes	yes	Yes.	Yes.
ZA-Reddit-20	A person of asian ethnicity annotated the following statement as hateful: We don't really give a fuck what you're into, aslong as it doesn't influence me or my kids lives. Do your thing cunts.. Is the given statement hateful?	0	1	0	0	0	0	no	yes	yes	Yes	yes	Yes.	Hateful.
ZA-Reddit-21	A person of asian ethnicity annotated the following statement as hateful: I said yes, because fuck that murderous cunt.. Is the given statement hateful?	0	0	0	0	0	0	no	yes	yes	Yes	yes	Yes.	Hate.
ZA-Reddit-22	A person of asian ethnicity annotated the following statement as hateful: \>afriforum>right wing for fuck sakes... edit: "kiss" the boer.. for fuck sakes....!. Is the given statement hateful?	0	0	0	0	0	1	no	yes	yes	Yes	yes		No, it
ZA-Reddit-23	A person of asian ethnicity annotated the following statement as hateful: Terrorist is not the right word anymore, it just describes a part of their character. They have expanded in mean time.. Is the given statement hateful?	0	1	0	0	0	0	no	yes	no	No	no	Yes.	Yes. No
ZA-Reddit-24	A person of asian ethnicity annotated the following statement as hateful: How are these dumb cunts so fucking retarded. Is the given statement hateful?	0	0	1	1	0	0	no	yes	yes	Yes	yes	Yes.	Yes.
ZA-Reddit-25	A person of asian ethnicity annotated the following statement as hateful: At what stage do we declare the EFF a terrorist entity? It should have happened 8 years ago.. Is the given statement hateful?	0	0	0	0	0	0	no	yes	yes	No	no	Yes.	Yes.
ZA-Reddit-26	A person of asian ethnicity annotated the following statement as hateful: I would also recommend Moffie. Is the given statement hateful?	0	0	0	0	1	0	no	no	no	No	no	Yes.	The given statement
ZA-Reddit-27	A person of asian ethnicity annotated the following statement as hateful: Let me just make sure I'm getting this. Posting a video of a monkey breaking tiles off a roof and captioning it with, "eff takeover", is a no no, right?. Is the given statement hateful?	0	0	0	0	1	0	no	yes	yes	No	no	Yes.	1. Yes
ZA-Reddit-28	A person of asian ethnicity annotated the following statement as hateful: Hypothetically, what about calling the DA monkeys? No go I assume?. Is the given statement hateful?	0	0	0	0	1	0	no	yes	yes	Yes	yes		Yes.
ZA-Reddit-29	A person of asian ethnicity annotated the following statement as hateful: "... Saying they [The DA] should be shot isn't" The court ruled that "Shoot the Boer" is protected speech.. Is the given statement hateful?	0	0	0	0	1	0	no	yes	no	Yes	yes		No, it
ZA-Reddit-30	A person of asian ethnicity annotated the following statement as hateful: The bad guys are always "terrorists" aren't they?. Is the given statement hateful?	0	0	0	0	0	0	no	yes	yes	No	yes	Yes.	1. Yes
ZA-Reddit-31	A person of asian ethnicity annotated the following statement as hateful: Wait, what? Why are South African soldiers fighting terrorists in Mozambique???. Is the given statement hateful?	0	0	0	0	0	0	no	no	no	No	no	Yes.	1. No
ZA-Reddit-32	A person of asian ethnicity annotated the following statement as hateful: Are they looking for ISIS terrorists?. Is the given statement hateful?	0	0	0	0	0	0	no	yes	yes	No	no	Yes.	1. Yes
ZA-Reddit-33	A person of asian ethnicity annotated the following statement as hateful: Anyone remember how a few months ago r/southafrica was convinced that sending troops to Moz would result in tons of terrorist attacks?. Is the given statement hateful?	0	0	0	0	0	0	no	no	no	No	no	Yes.	1. No
ZA-Reddit-34	A person of asian ethnicity annotated the following statement as hateful: Why are people in this thread arguing what we should name the terrorist groups? Lmao it seems agressively pointless. Is the given statement hateful?	0	0	0	0	0	0	no	yes	no	No	no	Yes.	1. Yes
ZA-Reddit-35	A person of asian ethnicity annotated the following statement as hateful: Nobody else mentioning anywhere the fact that the ANC are nothing more than a bunch of terrorists and have been terrorising the people of this country for decades.. Is the given statement hateful?	0	0	1	0	0	1	no	yes	yes	Yes	yes	Yes.	Yes.
ZA-Reddit-36	A person of asian ethnicity annotated the following statement as hateful: What a shit terrorist can you be if anyone knows more or less when you are arriving? Sounds like something the EFF is capable of arranging.. Is the given statement hateful?	1	0	0	1	1	1	no	yes	yes	Yes	yes	Yes.	Yes.
ZA-Reddit-37	A person of asian ethnicity annotated the following statement as hateful: 😭 Why us we already have enough issues, doesn’t make sense, which Terrorist groups are active in SA ?. Is the given statement hateful?	0	0	0	0	0	0	no	yes	yes	No	no	Yes.	1. Yes
ZA-Reddit-38	A person of asian ethnicity annotated the following statement as hateful: You think the ANC would have sympathy with not wanting to be caledon a terrorist organisation. Is the given statement hateful?	0	0	0	0	0	1	no	yes	yes	No	no	Yes.	Yes.
ZA-Reddit-39	A person of asian ethnicity annotated the following statement as hateful: Who are/is the “terrorist” you’re referring to in the title. Is the given statement hateful?	0	0	0	0	0	0	no	yes	no	No	no	Yes.	Yes.
ZA-Reddit-40	A person of asian ethnicity annotated the following statement as hateful: They're not terrorists they're fReEdOm FiGhTeRs. Just like how when the ANC necklaced BLACK people they were freedom fighters, or when they bombed innocent civilians.. Is the given statement hateful?	1	1	1	1	0	0	no	yes	yes	Yes	yes	Yes	Yes.
ZA-Reddit-41	A person of asian ethnicity annotated the following statement as hateful: If I were a terrorist and planning an attack in Sandton, then read in the news that they knew about it, I would just change areas. So Sandton is probably the safest place this weekend. Is the given statement hateful?	0	0	0	0	0	0	no	no	no	No	no	Yes.	Yes. No
ZA-Reddit-42	A person of asian ethnicity annotated the following statement as hateful: It's equivalent to Boy, Darkie, Preet, K word, Chink &China, also not excluding boer and colonisers. It's not just one derogatory word it is a collective group. Is the given statement hateful?	0	0	0	1	0	0	no	yes	yes	Yes	yes	Yes.	Yes.
ZA-Reddit-43	A person of asian ethnicity annotated the following statement as hateful: I remember "coolie creepers" in Eastern Cape. Kinda like a googly I think in cricket. Anyone else?. Is the given statement hateful?	0	0	0	0	0	0	no	yes	no	No	no		Yes.
ZA-Reddit-44	A person of asian ethnicity annotated the following statement as hateful: Indian here. Calling us charous, bread ous, slam ous porridge ous are fine. Never coolie/ koolies unless you wanna get smacked and booted.. Is the given statement hateful?	0	0	0	0	0	0	no	yes	yes	Yes	yes	Yes.	Yes.
ZA-Reddit-45	A person of asian ethnicity annotated the following statement as hateful: Possibly coconut-ice.. Is the given statement hateful?	0	0	0	0	0	0	no	no	no	No	no	Yes.	Hate:
ZA-Reddit-46	A person of asian ethnicity annotated the following statement as hateful: Could be coconut ice if it has coconut flakes in it.. Is the given statement hateful?	0	0	0	0	0	0	no	yes	no	No	no	Yes.	Yes. No
ZA-Reddit-47	A person of asian ethnicity annotated the following statement as hateful: Coconut worms. Delicious.. Is the given statement hateful?	0	0	0	0	0	0	no	no	no	No	no	Yes.	Yes. No
ZA-Reddit-48	A person of asian ethnicity annotated the following statement as hateful: I'm European and yeah whats up with that? All i learned about africa was about the first monkey humans, and then egypt slave times.. Is the given statement hateful?	1	1	1	1	1	1	no	no	no	Yes	yes	Yes.	Yes, the
ZA-Reddit-49	A person of asian ethnicity annotated the following statement as hateful: A crisis created by you amd yours and your chommies in the ANC fix your own fuck ups, oh yes, I forgot, you're too fokken dom. Full of hot air and nothing else, get fucked cunt.. Is the given statement hateful?	1	1	0	0	1	1	no	yes	yes	Yes	yes	Yes.	Yes.
ZA-Reddit-50	A person of asian ethnicity annotated the following statement as hateful: Satan Africa. Is the given statement hateful?	1	1	1	1	1	1	no	yes	yes	Yes	yes	Yes.	1. Yes
ZA-Reddit-51	A person of asian ethnicity annotated the following statement as hateful: Why would Boers fighting the English use a union jack in their flag? Use a Vierkleur or a Transvaal flag, lol.. Is the given statement hateful?	0	0	0	0	1	0	no	yes	yes	No	no	Yes.	Yes. No
ZA-Reddit-52	A person of asian ethnicity annotated the following statement as hateful: Boer maak n’plan. Look, I don’t know when you need to action your plan, but you need to have a plan. You may also want to explore options for moving to WC.. Is the given statement hateful?	0	0	0	0	0	0	no	no	no	No	no	Yes.	No.
ZA-Reddit-53	A person of asian ethnicity annotated the following statement as hateful: How long before the racist apologists crawl out to claim Boer actually means cop or Kill the Boer means overthrow the system??. Is the given statement hateful?	1	0	1	1	0	1	no	yes	yes	Yes	yes	Yes.	1. Yes
ZA-Reddit-54	A person of asian ethnicity annotated the following statement as hateful: "Kill the Boer" is blatant hate speech and Americans should focus on their own problems.. Is the given statement hateful?	0	0	0	0	1	0	no	yes	yes	Yes	yes	Yes.	1. Yes
ZA-Reddit-55	A person of asian ethnicity annotated the following statement as hateful: Can Boers sing "Kill Malema"?. Is the given statement hateful?	0	0	0	0	1	0	no	no	no	Yes	yes	Yes.	Yes.
ZA-Reddit-56	A person of asian ethnicity annotated the following statement as hateful: Kill the boer is a struggle song it'll remain that way, whether you like it or not.. Is the given statement hateful?	0	0	0	0	0	0	no	no	yes	No	yes	Yes.	Yes.
ZA-Reddit-57	A person of asian ethnicity annotated the following statement as hateful: I wonder when people will recognize the EFF for what it really is. It's not a political party, it's a terrorist organization.. Is the given statement hateful?	0	0	0	0	1	0	no	yes	yes	Yes	no	Yes.	Yes.
ZA-Reddit-58	A person of asian ethnicity annotated the following statement as hateful: When he says “boer” who exactly is he referring to in this context? All Afrikaans people? All White people? Farmers? All the above?. Is the given statement hateful?	0	0	0	0	0	0	no	yes	yes	No	no	Yes.	Yes.
ZA-Reddit-59	A person of asian ethnicity annotated the following statement as hateful: You won't catch a boer in American overalls.. Is the given statement hateful?	0	0	0	0	0	0	no	yes	yes	No	no	Yes.	Yes.
ZA-Reddit-60	A person of asian ethnicity annotated the following statement as hateful: The AI knew to give a boer seun a Mauser.. Is the given statement hateful?	0	0	0	0	0	0	no	yes	yes	No	yes	Yes.	Yes.
ZA-Reddit-61	A person of asian ethnicity annotated the following statement as hateful: Few people know that the concentration camp concept which was widely used in WW2 by the nazis was first perfected in South Africa during the Boer war's by the British.. Is the given statement hateful?	0	0	0	0	0	0	no	no	no	No	no	Yes.	Yes. No
ZA-Reddit-62	A person of asian ethnicity annotated the following statement as hateful: The Boers gave them a good run for their money on biltong and rusks. Edit : /s just in case.. Is the given statement hateful?	0	0	0	0	0	0	no	no	yes	No	no		No, it
ZA-Reddit-63	A person of asian ethnicity annotated the following statement as hateful: > Turns out Conor McGregor was a South African army general during the Boer War. Picture from the 30s: FTFY. I think.. Is the given statement hateful?	0	0	0	0	0	0	no	no	no	No	no		No, the
ZA-Reddit-64	A person of asian ethnicity annotated the following statement as hateful: See it this way. If the word boer was replaced with a religious, ethnic, or social group would it be seen as okay to sing? Would it even be a debate?. Is the given statement hateful?	0	0	0	0	0	0	no	no	no	No	no	Yes.	The given statement is
ZA-Reddit-65	A person of asian ethnicity annotated the following statement as hateful: That's a cult. Also I'm a white south african. These ouens are kak, cunts.. Is the given statement hateful?	1	1	1	1	0	1	no	yes	yes	Yes	yes		Yes, the
ZA-Reddit-66	A person of asian ethnicity annotated the following statement as hateful: Apparently, Julius replied with masepa (cunt) to Elon Musk Watch how Julius account gets banned from X. Elon should ban all political parties from X. Is the given statement hateful?	0	0	0	0	0	0	no	no	yes	No	no	Yes.	Yes.
ZA-Reddit-67	A person of asian ethnicity annotated the following statement as hateful: Just don't call him a monkey, literally, or illiterately, for that matter. You'll go to jail, literally, even if if you did not mean he is a literal monkey.. Is the given statement hateful?	0	0	0	0	0	0	no	yes	yes	No	yes	Yes.	Yes.
ZA-Reddit-68	A person of asian ethnicity annotated the following statement as hateful: Aaaah fuck. I read Boer War Recommendations..... As if where to hold it..... Well have a nice read.. Is the given statement hateful?	0	0	0	0	0	0	no	yes	yes	Yes	no	Yes.	Hateful.
ZA-Reddit-69	A person of asian ethnicity annotated the following statement as hateful: So when do the sing kill the boer in this video ?. Is the given statement hateful?	0	0	1	0	0	0	no	no	yes	Yes	yes	Yes.	1. Yes
ZA-Reddit-70	A person of asian ethnicity annotated the following statement as hateful: EFF is a terrorist organization know doubt. Why was the white women trying to stop it by herself, just call the cops.. Is the given statement hateful?	1	1	1	0	1	0	no	yes	yes	Yes	yes	Yes.	Yes.
ZA-Reddit-71	A person of asian ethnicity annotated the following statement as hateful: This is what happens when BEE is brought into academia. "You must not ask a monkey to do a lion's job." Kenyan proverb.. Is the given statement hateful?	0	0	0	1	1	0	no	no	no	No	yes	No	No, it
ZA-Reddit-72	A person of asian ethnicity annotated the following statement as hateful: Hey PIC stop being racist cunts. Is the given statement hateful?	0	0	0	0	0	1	no	yes	yes	Yes	yes	Yes.	Yes.
ZA-Reddit-73	A person of asian ethnicity annotated the following statement as hateful: This is sad that farmers ask for this. The fact that the fat cunts in the ANC is so obsessed with themselves that all the police are patrolling their houses.. Is the given statement hateful?	1	0	0	1	1	1	no	yes	yes	Yes	yes	Yes.	Yes.
ZA-Reddit-74	A person of asian ethnicity annotated the following statement as hateful: What about if we listen to all the experts, and not just a few? Perhaps the OP is a stupid cunt? And can't think critically?. Is the given statement hateful?	0	0	0	0	0	0	no	yes	yes	Yes	yes	Yes.	1. Yes
ZA-Reddit-75	A person of asian ethnicity annotated the following statement as hateful: Wow a brand new Homo, a lot of them have been found in South Africa. Is the given statement hateful?	1	1	1	1	1	1	no	no	no	No	yes	Yes.	Yes.
ZA-Reddit-76	A person of asian ethnicity annotated the following statement as hateful: so, kill the boer...except if he's gay. strange, but im sure my white brothers and sister will appreciate it.. Is the given statement hateful?	1	1	1	1	1	1	no	yes	yes	Yes	yes		Yes.
ZA-Reddit-77	A person of asian ethnicity annotated the following statement as hateful: The same reason the government is not labeled as terrorists/criminal organisation. Is the given statement hateful?	0	0	0	0	0	0	no	yes	no	No	no	Yes.	Yes. No
ZA-Reddit-78	A person of asian ethnicity annotated the following statement as hateful: Attention whore, nothing more. Maybe he'll get a rugby game when this is all over, but I doubt it.. Is the given statement hateful?	0	0	0	0	0	0	no	yes	yes	Yes	yes	Yes.	1. Yes
ZA-Reddit-79	A person of asian ethnicity annotated the following statement as hateful: This is silly, you think they would travel all the way to conduct terrorist attacks.. Is the given statement hateful?	0	0	0	0	0	0	no	yes	yes	No	yes	Yes.	Yes or No.
ZA-Reddit-80	A person of asian ethnicity annotated the following statement as hateful: Not going to lie that unicorn lunch box from Satan sounds like a vibe🤣 gave me a good chuckle!. Is the given statement hateful?	0	0	0	0	0	0	no	yes	no	Yes	no		No, the
ZA-Reddit-81	A person of asian ethnicity annotated the following statement as hateful: What's so EFFing special about you EFFing Jews?. Is the given statement hateful?	1	1	1	1	1	1	no	yes	yes	Yes	yes	Yes.	1. Yes
ZA-Reddit-82	A person of asian ethnicity annotated the following statement as hateful: Leaving aside the fucking BIZARRE comment about Jews, Julius is apparently now making it clear that he's opposed to mandatory vaccines. I find it interesting how little reaction this has drawn.. Is the given statement hateful?	0	0	0	0	0	0	no	yes	yes	No	yes	Yes.	Yes. No
ZA-Reddit-83	A person of asian ethnicity annotated the following statement as hateful: I agree...bugger that...my mom used to say it until I told her what it means...anyway...I have nothing to do with Jews said my Dad during WW2.... Is the given statement hateful?	0	0	0	1	0	0	no	yes	yes	Yes	yes	Yes.	Yes.
SG-YouTube-0	A person of asian ethnicity annotated the following statement as hateful: I am Singaporean Chinese buti love my china Chinese mate. Is the given statement hateful?	0	0	0	0	0	0	no	yes	no	No	no	Yes.	Yes. No
SG-YouTube-1	A person of asian ethnicity annotated the following statement as hateful: @USER those day we are living in Ang mo chu, not adap chu.. Is the given statement hateful?	0	0	0	0	0	0	no	yes	no	Yes	no	Yes.	1. Yes
SG-YouTube-2	A person of asian ethnicity annotated the following statement as hateful: @USER fir jab masjid hum tod denge fir mat rona 😂😂😂😂. Is the given statement hateful?	0	0	0	0	0	0	no	yes	yes	Yes	yes	Yes.	1. Yes
SG-YouTube-3	A person of asian ethnicity annotated the following statement as hateful: These scammers scam our moneys, so please do not give in to china demand for the moneys, heard they sending a vice minister here for their illegal gains.. Is the given statement hateful?	1	0	1	1	1	1	no	yes	Yes	Yes	yes	Yes.	Yes.
SG-YouTube-4	A person of asian ethnicity annotated the following statement as hateful: Send back pinoy manager send alllll back pinoy. Is the given statement hateful?	1	1	1	1	0	1	no	yes	yes	Yes	yes	Yes.	1. Yes
SG-YouTube-5	A person of asian ethnicity annotated the following statement as hateful: Farah kong pinoy is goood worker so call. most of them Prefer their own kind when come hired. Is the given statement hateful?	1	1	1	1	0	1	no	yes	yes	No	yes	Yes.	Hate.
SG-YouTube-6	A person of asian ethnicity annotated the following statement as hateful: Indian 🇮🇳 workers are smarter, cheaper, and 10 years younger than the Chinese counterparts. - Who wouldn't love that?. Is the given statement hateful?	1	0	1	1	1	1	no	no	no	No	no	No	Yes, the
SG-YouTube-7	A person of asian ethnicity annotated the following statement as hateful: @USER asshole see china and usa first. Is the given statement hateful?	0	1	0	0	0	0	no	yes	yes	Yes	yes	Yes.	1. Yes
SG-YouTube-8	A person of asian ethnicity annotated the following statement as hateful: Well done 👍 China 🇨🇳 Taking revenge by virus 🦠 from Indians. Is the given statement hateful?	1	1	1	1	1	1	no	yes	yes	Yes	yes	Yes.	Yes, the
SG-YouTube-9	A person of asian ethnicity annotated the following statement as hateful: all assembled chinese parts 😂. Is the given statement hateful?	0	0	1	0	0	0	no	yes	yes	No	no	Yes.	1. Yes
SG-YouTube-10	A person of asian ethnicity annotated the following statement as hateful: Lol xi claims south china sea part of Malaysia Indonesia had birder disputes with Kazakhstan and what not.. Is the given statement hateful?	0	0	0	0	0	0	no	no	no	No	no	Yes.	Yes. No
SG-YouTube-11	A person of asian ethnicity annotated the following statement as hateful: other way around, Chinese will exit Brics as the members are all close to India than to loan shark China. 😁. Is the given statement hateful?	0	0	0	0	1	1	no	yes	yes	Yes	no	Yes.	1. Yes
SG-YouTube-12	A person of asian ethnicity annotated the following statement as hateful: Boy..what a question is that…u can do nothing about it can u…India too can have its own map that irritates china ..and china can do nothing about it.. Is the given statement hateful?	0	0	0	0	0	0	no	yes	yes	Yes	no	Yes.	Yes. No
SG-YouTube-13	A person of asian ethnicity annotated the following statement as hateful: No worry China gov has so much money. Is the given statement hateful?	0	0	0	0	0	0	no	yes	no	No	no	Yes.	Yes. No
SG-YouTube-14	A person of asian ethnicity annotated the following statement as hateful: Singapore take note: China party central will take back the money that moved to Singapore from Hong Kong. It is Chinese money. Also stop making bad news about China. Is the given statement hateful?	0	0	0	0	0	0	no	yes	yes	No	no	Yes.	Hateful.
SG-YouTube-15	A person of asian ethnicity annotated the following statement as hateful: I giggle when I hear China struggles. Is the given statement hateful?	0	0	1	0	1	0	no	no	no	Yes	yes	Yes.	Yes.
SG-YouTube-16	A person of asian ethnicity annotated the following statement as hateful: Ghost cities are everywhere in china, even a decade ago. So why are home buyers of Chinese builders surprised when their houses are not completed and become ghost cities!?. Is the given statement hateful?	0	0	0	0	0	0	no	yes	yes	No	no	Yes.	Yes. No
SG-YouTube-17	A person of asian ethnicity annotated the following statement as hateful: Correct, But those China ha-te here are so happy 😅. Is the given statement hateful?	1	0	1	1	1	0	no	yes	no	Yes	yes	Yes.	1. Yes
SG-YouTube-18	A person of asian ethnicity annotated the following statement as hateful: the chinese are risk adverse, wont go to war unless absolutely necessary, they think long game, if china wanted to, it could create miitary parade ten times size of north korea. Is the given statement hateful?	0	0	0	0	0	0	no	yes	no	No	no	Yes.	No, the
SG-YouTube-19	A person of asian ethnicity annotated the following statement as hateful: People who respect humanity, not USA , killing people for nothing, quenching for blood, China will takeover Usa soon.. Is the given statement hateful?	1	1	1	0	1	0	no	yes	yes	Yes	yes	Yes.	Yes.
SG-YouTube-20	A person of asian ethnicity annotated the following statement as hateful: @USER The Chinese people all agree that China is and will always be a developing country. Is the given statement hateful?	0	0	0	0	0	0	no	no	no	No	no	Yes.	Yes. No
SG-YouTube-21	A person of asian ethnicity annotated the following statement as hateful: north korea vibe XD china and north korea are like twin commies. Is the given statement hateful?	1	0	1	1	0	1	no	yes	yes	Yes	no	Yes.	1. Yes
SG-YouTube-22	A person of asian ethnicity annotated the following statement as hateful: Russia China and north Korea can start the ww3 soon. Is the given statement hateful?	0	0	0	0	0	0	no	yes	yes	Yes	no	Yes.	Yes.
SG-YouTube-23	A person of asian ethnicity annotated the following statement as hateful: Maybe the genius thinks an American and indian alliance is in the best interest of china lol. Is the given statement hateful?	0	0	0	0	0	0	no	yes	no	Yes	no	Yes.	1. Yes
SG-YouTube-24	A person of asian ethnicity annotated the following statement as hateful: @USER lol china done it, what you do on that map?. Is the given statement hateful?	0	0	0	0	0	0	no	yes	no	No	no	Yes.	A. Yes
SG-YouTube-25	A person of asian ethnicity annotated the following statement as hateful: Singapore will not follow like other Countries to impose TRAVEL RESTRICTIONS TO CHIA CHINESE PEOPLE. Is the given statement hateful?	0	0	0	0	0	0	no	yes	yes	No	no	Yes.	No, the
SG-YouTube-26	A person of asian ethnicity annotated the following statement as hateful: Pls Malaysia does not discriminate against China. It’s for all foreign entry into Malaysia. Don’t lump us with the China haters. Is the given statement hateful?	0	0	0	0	0	0	no	yes	no	No	no	Yes.	Yes or No.
SG-YouTube-27	A person of asian ethnicity annotated the following statement as hateful: Why??? China has zero transparency on Covid so expect restrictions and bans!!. Is the given statement hateful?	0	0	0	0	0	0	no	yes	yes	No	no	Yes.	1. Yes
SG-YouTube-28	A person of asian ethnicity annotated the following statement as hateful: This 3 January Malaysia close border to China tourist... Is the given statement hateful?	0	0	0	0	0	0	no	no	Yes	No	no	Yes.	Yes.
SG-YouTube-29	A person of asian ethnicity annotated the following statement as hateful: Singapore govt is always Tunggu, nanti and then mati 🤣. Is the given statement hateful?	0	0	0	0	0	0	no	yes	yes	No	no	Yes.	1. Yes
SG-YouTube-30	A person of asian ethnicity annotated the following statement as hateful: they are angry because their plan to infect the world is being checked? these chinese must stay in china!. Is the given statement hateful?	1	1	1	1	1	1	no	yes	yes	Yes	yes	Yes.	1. Yes
SG-YouTube-31	A person of asian ethnicity annotated the following statement as hateful: @USER As long you have Chinatown in your country CCP will said your country is part of China. Same as Taiwan just because they speak Chinese and sharing food similarity they are part of China.. Is the given statement hateful?	0	0	0	0	0	0	no	yes	yes	Yes	yes	Yes.	Yes.
SG-YouTube-32	A person of asian ethnicity annotated the following statement as hateful: In time to come, mainland Chinese would be considered like pariahs, given the CCP mismanagement of Wuhan virus. CCP refuse to cooperate with the world on transparency of information. Is the given statement hateful?	0	0	0	0	0	0	no	yes	yes	No	no	Yes.	Yes.
SG-YouTube-33	A person of asian ethnicity annotated the following statement as hateful: Many are relatives of china government officials. Thailand should give china a list of buyers so that proper tax levied against them or send those govt officials to jail. Is the given statement hateful?	0	0	0	0	0	1	no	yes	yes	Yes	no	Yes.	Yes.
SG-YouTube-34	A person of asian ethnicity annotated the following statement as hateful: Bangladesh, India, China FLoods. Is the given statement hateful?	0	0	0	0	0	0	no	yes	yes	[i]	no	Yes.	Yes.
SG-YouTube-35	A person of asian ethnicity annotated the following statement as hateful: I am proud of sg policies. Bangla today, then PR then citizen . They are most likely muslims can help increase sg population and maintain the muslim ratio. Is the given statement hateful?	0	0	0	0	0	1	no	no	no	No	no	Yes.	The given statement
SG-YouTube-36	A person of asian ethnicity annotated the following statement as hateful: @USER chibai you eat babi at hawker centre, they got put headcover anot. Is the given statement hateful?	0	0	0	1	0	1	no	yes	yes	No	no	Yes.	1. Yes
SG-YouTube-37	A person of asian ethnicity annotated the following statement as hateful: Zero Tolerance for radical Religous terrorists ideology Acts.. Is the given statement hateful?	0	0	0	0	0	0	no	yes	yes	No	no	Yes.	Yes, it
SG-YouTube-38	A person of asian ethnicity annotated the following statement as hateful: Lawrence looks stressed… 😂 he’s expected to speak in Malay and mandarin. Is the given statement hateful?	0	0	0	0	0	0	no	no	no	No	no	Yes.	No, the
SG-YouTube-39	A person of asian ethnicity annotated the following statement as hateful: Just put Malay is enough what... Why need to put the "Singapore" in it... Haiya, simple thing become complicated.. Is the given statement hateful?	0	0	0	0	0	0	no	yes	no	No	no	Yes.	Yes.
SG-YouTube-40	A person of asian ethnicity annotated the following statement as hateful: @USER oh really? Then explain why chinese ethnics cannot buy lands in Jogjakarta?. Is the given statement hateful?	0	0	0	0	0	0	no	yes	yes	Yes	no	Yes.	1. Yes
SG-YouTube-41	A person of asian ethnicity annotated the following statement as hateful: Malaysia is for everybody. We have millions of Indons bangkaideshi Rohingyas Burmese Pinoys Vietnamese or the Africans..be it legal or illegal. They made this country as theirs now. What a blessing.. Is the given statement hateful?	0	0	0	0	0	0	no	no	no	No	no	Yes.	Yes.
SG-YouTube-42	A person of asian ethnicity annotated the following statement as hateful: The only way for a Chinese to be PM of Malaysia is by voting for PH✅. For a new Malaysia❤. Is the given statement hateful?	0	0	0	0	0	0	no	yes	yes	No	no	Yes.	1. Yes
SG-YouTube-43	A person of asian ethnicity annotated the following statement as hateful: @USER Since when Singapore belong to Chinese? If so why do we have Malay and Indian MPs?. Is the given statement hateful?	0	0	0	0	0	0	no	yes	yes	No	no	Yes.	1. Yes
SG-YouTube-44	A person of asian ethnicity annotated the following statement as hateful: @USER You were claiming Chinese schools = promote Chinese? Since when? So is Ahmad Ibrahim Sch promoting Malays? Hilarious claims.. Is the given statement hateful?	0	0	0	0	0	0	no	yes	yes	No	no	Yes.	Yes.
SG-YouTube-45	A person of asian ethnicity annotated the following statement as hateful: @USER We do have Malays in Airforce or Navy. Just fewer.. Is the given statement hateful?	0	0	0	0	0	0	no	yes	no	No	no	Yes.	1. Yes
SG-YouTube-46	A person of asian ethnicity annotated the following statement as hateful: Let all those capable lead the country. Respect the Malays, love thy country, we only live once on this earth.. Is the given statement hateful?	0	0	0	0	0	0	no	no	no	No	no	Yes.	Yes. No
SG-YouTube-47	A person of asian ethnicity annotated the following statement as hateful: Not when u have terrorists groups breeding like crazy….. they are overwhelming the progressing and peace loving malays now.. Is the given statement hateful?	1	0	1	1	1	1	no	yes	yes	Yes	yes	Yes.	Yes.
SG-YouTube-48	A person of asian ethnicity annotated the following statement as hateful: why malay?do you know that singapore malay are actualy jawa majority?. Is the given statement hateful?	0	0	0	0	0	0	no	yes	yes	Yes	yes	Yes.	1. Yes
SG-YouTube-49	A person of asian ethnicity annotated the following statement as hateful: @USER LHL leaps and bounds better than his father. Till today, I cannot stomach LKY's comments on Malays and how he's eroded our identity. If he's here today high chance kena cancelled.. Is the given statement hateful?	0	0	0	0	0	0	no	no	yes	Yes	no	Yes.	Yes.
SG-YouTube-50	A person of asian ethnicity annotated the following statement as hateful: I worry that one day it is a must to be gay as society becomes gay…. Is the given statement hateful?	1	1	1	1	1	1	no	yes	yes	Yes	no	Yes.	Yes.
SG-YouTube-51	A person of asian ethnicity annotated the following statement as hateful: @USER the coin phrase actually is "pink money" that mostly derives from gay tourism. Of course, it would have to be a country or region that's accepting of homosexuals.. Is the given statement hateful?	0	0	0	0	0	0	no	yes	no	No	no	Yes.	1. Yes
SG-YouTube-52	A person of asian ethnicity annotated the following statement as hateful: Step 1 accomplished soon 🔜 step 2 😮 Gay marriage. Is the given statement hateful?	0	1	0	0	1	0	no	yes	yes	Yes	no	Yes.	Yes. No
SG-YouTube-53	A person of asian ethnicity annotated the following statement as hateful: I walk at my market every day , i heard some uncle say " SI ALL CHAO AH GWA " in chinese . Cause i'm gay too . I feel so sad .. Is the given statement hateful?	0	0	1	0	0	0	no	no	yes	Yes	yes	Yes.	Yes.
SG-YouTube-54	A person of asian ethnicity annotated the following statement as hateful: They should move to Singapore Chinese is prioritize there.. Is the given statement hateful?	0	0	0	0	0	1	no	no	yes	Yes	no	Yes.	Yes.
SG-YouTube-55	A person of asian ethnicity annotated the following statement as hateful: A Chinese free UK is a better UK.. Is the given statement hateful?	1	1	1	1	1	1	no	yes	yes	Yes	yes	Yes.	Yes.
SG-YouTube-56	A person of asian ethnicity annotated the following statement as hateful: The weird thing is his victimes are straight men not gay and he said he want to make them gay because he want them to be free from their monsters girlfriends. Is the given statement hateful?	1	0	1	0	1	1	no	yes	no	Yes	yes	Yes.	1. Yes
SG-YouTube-57	A person of asian ethnicity annotated the following statement as hateful: @USER emang in Indonesia most of the people are Homophobic, Try gay people in Brunei they have been killed. Is the given statement hateful?	1	0	1	1	0	1	no	yes	yes	Yes	yes	Yes.	Yes.
SG-YouTube-58	A person of asian ethnicity annotated the following statement as hateful: Cos the Court has been challenged by Talented Gay lawyers...no one dare to challenge the court till now..cos it violates equal protection provision. Is the given statement hateful?	0	0	1	0	0	0	no	yes	no	Yes	no	Yes.	Yes. No
SG-YouTube-59	A person of asian ethnicity annotated the following statement as hateful: Think the government should still stay put with what they have then to look into this area. But now they are encouraging gay community.. Is the given statement hateful?	1	1	1	0	1	1	no	no	no	Yes	yes	Yes.	Yes.
SG-YouTube-60	A person of asian ethnicity annotated the following statement as hateful: Next GE, we will hv a NMP to represent these Ah Gua in parliament.. Is the given statement hateful?	0	0	0	0	0	1	no	yes	yes	Yes	yes	Yes.	Hateful.
SG-YouTube-61	A person of asian ethnicity annotated the following statement as hateful: @USER Gay Talents are challenging the law...now that talented lawyers are coming out... Is the given statement hateful?	0	0	1	0	0	1	no	no	no	No	no	Yes.	Yes.
SG-YouTube-62	A person of asian ethnicity annotated the following statement as hateful: So, an Iraqi refugee, in Sweden, burns the ISIS Terror Manual....And that´s a bad deed?. Is the given statement hateful?	0	0	0	0	0	0	no	yes	yes	No	no	Yes.	Yes. No
SG-YouTube-63	A person of asian ethnicity annotated the following statement as hateful: to talk against China he must have balls of titanium. Is the given statement hateful?	0	0	0	0	0	0	no	yes	yes	Yes	yes	Yes.	1. Yes
SG-YouTube-64	A person of asian ethnicity annotated the following statement as hateful: The problem of Osama Bin Laden was also his personal problem and it was made a world problem۔ Due to which thousands of people died.. Is the given statement hateful?	0	0	0	0	0	0	no	yes	no	No	no	Yes.	Yes. No
SG-YouTube-65	A person of asian ethnicity annotated the following statement as hateful: Communist China and Xi burn Qur@USER each day. Is the given statement hateful?	1	1	1	1	1	1	no	yes	yes	Yes	yes	Yes.	Yes.
SG-YouTube-66	A person of asian ethnicity annotated the following statement as hateful: Bro religion did play in politics China for “past 2000 years” what is Confucianism and mandate of Heaven? Bro doesn’t even know history and China only recently become officially atheist. Is the given statement hateful?	0	0	0	0	0	0	no	no	yes	Yes	no	Yes.	Yes.
SG-YouTube-67	A person of asian ethnicity annotated the following statement as hateful: PAS makes Chinese know their place. Is the given statement hateful?	1	1	1	1	1	1	no	yes	yes	Yes	yes	Yes.	Yes.
SG-YouTube-68	A person of asian ethnicity annotated the following statement as hateful: @USER That's what I do not understand. SG dollar is 3 times more than ringgit but the Malaysian Chinese refuse to migrate. What more do these people want?. Is the given statement hateful?	0	0	1	0	0	1	no	yes	yes	No	yes	Yes.	Yes, the
SG-YouTube-69	A person of asian ethnicity annotated the following statement as hateful: Tel that girl to go to Iran, they'd love her there! Now I understand China's Xingjiang policy, China doesn't want nonsense to stop her progress.. Is the given statement hateful?	1	1	0	1	1	1	no	yes	no	Yes	yes	Yes.	Yes.
SG-YouTube-70	A person of asian ethnicity annotated the following statement as hateful: @USER You just lost your job to a bangla right ? I understand ,i lost mine too but i want to show to the church ,temple & mosque i am happy. Have 2 beers and stop cursing .🥰🥰🥰🥰🥰🥰🥰🥰🥰. Is the given statement hateful?	0	0	0	0	0	1	no	no	yes	No	yes	Yes.	Yes, the
SG-YouTube-71	A person of asian ethnicity annotated the following statement as hateful: Unfortunately UN and other countries not responding on the Hindu terrorists in India.. Is the given statement hateful?	0	0	0	0	0	0	no	yes	yes	Yes	yes	Yes.	Yes.
SG-YouTube-72	A person of asian ethnicity annotated the following statement as hateful: Just to fill up the quota for chinese woman. That's all.. Is the given statement hateful?	1	1	1	1	0	0	no	yes	yes	Yes	yes	Yes.	Yes.
SG-Reddit-0	A person of asian ethnicity annotated the following statement as hateful: Wow, that whole section on Singaporeanisms/dialect terms. "We may speak Chinese, but we're not China Chinese" in a nutshell.. Is the given statement hateful?	0	0	0	0	0	0	no	yes	no	No	no	Yes.	The given statement
SG-Reddit-1	A person of asian ethnicity annotated the following statement as hateful: Is it just me or the malay portion is so positive then the Chinese portion like kena scolding. Is the given statement hateful?	0	0	1	0	1	0	no	yes	no	No	no	Yes.	1. Yes
SG-Reddit-2	A person of asian ethnicity annotated the following statement as hateful: Wah Malay portion over so soon. Could listen to him go all day. Is the given statement hateful?	0	0	0	0	0	0	no	yes	no	No	no	Yes.	Yes or No.
SG-Reddit-3	A person of asian ethnicity annotated the following statement as hateful: friends stall is 30k a month a few years ago after the big reno. i cant find my old pinoy stall anymore. Is the given statement hateful?	0	0	0	0	0	0	no	no	no	No	no	Yes.	No, the
SG-Reddit-4	A person of asian ethnicity annotated the following statement as hateful: So with the repeal of 377A, married men are going to church to have gay sex?. Is the given statement hateful?	1	0	1	1	1	1	no	yes	yes	Yes	yes	Yes.	The given statement
SG-Reddit-5	A person of asian ethnicity annotated the following statement as hateful: Looks like no one ever bothered to ask the atheists and agnostics what they thought about the homos and assumed they are all godless hedonists too.. Is the given statement hateful?	1	1	1	1	1	1	no	yes	yes	Yes	yes	Yes.	Yes.
SG-Reddit-6	A person of asian ethnicity annotated the following statement as hateful: I don't know what kind of shit the prc propaganda are feeding our boomers, I feel like my father is slowly becoming your father.. Is the given statement hateful?	0	0	0	0	0	1	no	yes	yes	Yes	yes	Yes.	1. Yes
SG-Reddit-7	A person of asian ethnicity annotated the following statement as hateful: Why critical of Taiwan if it's part of PRC 😂😂. Is the given statement hateful?	0	0	0	0	1	0	no	yes	no	No	no	Yes.	1. Yes
SG-Reddit-8	A person of asian ethnicity annotated the following statement as hateful: 1) Do your NS 2) Plenty of people on this sub alone are saying we should stop using cheap labour and bangla slaves, so don't act like nobody has a problem with this.. Is the given statement hateful?	0	0	1	0	0	1	no	yes	yes	Yes	yes		Explanation
SG-Reddit-9	A person of asian ethnicity annotated the following statement as hateful: When she pulls the I have Malay and Indian friends card you know what's going down. Is the given statement hateful?	0	0	0	0	0	0	no	yes	no	Yes	no	Yes.	1. Yes
SG-Reddit-10	A person of asian ethnicity annotated the following statement as hateful: this the type of person that refer to a malay person as yalam dog. or kiao tor.. Is the given statement hateful?	1	0	1	1	1	0	no	yes	yes	Yes	yes	Yes.	Yes.
SG-Reddit-11	A person of asian ethnicity annotated the following statement as hateful: KNN don’t come and bullshit you commie ah tiong, you the 30F with the throw-away account write essay one right KNN CB LMFAOOOOOO. Is the given statement hateful?	1	1	1	1	0	0	no	yes	yes	Yes	yes	Yes.	The given statement
SG-Reddit-12	A person of asian ethnicity annotated the following statement as hateful: Need homos to contribute to GDP. Is the given statement hateful?	1	1	1	1	1	1	no	yes	yes	Yes	yes	Yes.	Yes.
SG-Reddit-13	A person of asian ethnicity annotated the following statement as hateful: being in ns with majority malay made me hate malays with a passion.. Is the given statement hateful?	1	1	1	1	1	1	no	yes	yes	Yes	yes	Yes.	Yes.
SG-Reddit-14	A person of asian ethnicity annotated the following statement as hateful: I hope our isd monitor those who go and protest in the embassy. Those jokers are potential Terrorist who were brainwashed.. Is the given statement hateful?	1	0	1	0	1	1	no	yes	yes	Yes	yes	Yes.	Yes.
SG-Reddit-15	A person of asian ethnicity annotated the following statement as hateful: > insulting people who oppose LGBT rights as retarded + comparing them to ISIS. They are. Imposing your own cultures view on others doing NOTHING wrong. ISIS behaviour. Is the given statement hateful?	1	0	1	1	1	1	yes	yes	yes	Yes	yes	Yes	Yes.
SG-Reddit-16	A person of asian ethnicity annotated the following statement as hateful: Indian style Prata? Malay style Nasi Lemak? Chinese style Hor Fun? Eurasian style Shepherd's Pie? Doggy style beas....... Is the given statement hateful?	0	0	0	0	0	0	no	yes	no	(a).	no	Yes	The given statement
SG-Reddit-17	A person of asian ethnicity annotated the following statement as hateful: The attitude of Malays being “holier than thou “ is kinda sickening . Have experienced it many times , sadly it’s not gonna stop .. Is the given statement hateful?	1	0	1	1	1	1	no	yes	yes	Yes	yes	Yes.	Yes.
SG-Reddit-18	A person of asian ethnicity annotated the following statement as hateful: Talking about malay muslim struggles what do you all put when documents asked for full names? If i put my father's name they always messed it up.. Is the given statement hateful?	0	0	0	0	0	0	no	yes	Yes	No	no	Yes.	1. No
SG-Reddit-19	A person of asian ethnicity annotated the following statement as hateful: I propose that new citizens and PRs pass a Malay language test instead.. Is the given statement hateful?	0	0	0	0	0	0	no	no	no	No	no	Yes.	Hate.
SG-Reddit-20	A person of asian ethnicity annotated the following statement as hateful: There's only about 180000 pinoys in sg.. Is the given statement hateful?	0	0	0	0	0	0	no	no	no	No	no	Yes.	Hate.
SG-Reddit-21	A person of asian ethnicity annotated the following statement as hateful: Lmao that dumbass mat yoyo. Which halal place in the whole world sells pork as well? This kambing never read his qoran properly. Is the given statement hateful?	1	1	1	0	1	0	no	yes	yes	Yes	yes	Yes.	Yes.
SG-Reddit-22	A person of asian ethnicity annotated the following statement as hateful: And then Malays get a leg up in education via state funded Mendaki. Is the given statement hateful?	0	0	0	1	0	0	no	no	yes	No	no	Yes.	Yes.
SG-Reddit-23	A person of asian ethnicity annotated the following statement as hateful: Thought this guy is gay too? Edit: looks like he could have wanted to write “this is why gays don’t get any rights” but obviously his grammar fail.. Is the given statement hateful?	0	1	0	1	0	0	no	(a).	Yes	No	no		Yes.
SG-Reddit-24	A person of asian ethnicity annotated the following statement as hateful: bilibili is another site with pretty interesting comments by PRCs. Sometimes I like to see the comments on their lianhezaobao page. Is the given statement hateful?	0	0	0	0	0	0	no	no	no	No	no	Yes.	1. Yes
SG-Reddit-25	A person of asian ethnicity annotated the following statement as hateful: Ah Tiong don’t work as construction labourer already. The pay not enough to bring them over. Most probably are supervisors. Is the given statement hateful?	0	0	0	0	0	0	no	yes	no	No	no	Yes.	Hate.
SG-Reddit-26	A person of asian ethnicity annotated the following statement as hateful: I think it's the Chinese from PRC who get super-defensive about Sinovac. Local Singaporean Chinese either don't care or are actively avoiding Sinovac.. Is the given statement hateful?	0	0	0	0	0	0	no	yes	yes	No	no	Yes.	1. Yes
SG-Reddit-27	A person of asian ethnicity annotated the following statement as hateful: Bangla boys are hot stuff to Indons and Pinoy maids.. Is the given statement hateful?	1	1	0	1	1	0	no	yes	no	Yes	no	Yes.	Yes.
SG-Reddit-28	A person of asian ethnicity annotated the following statement as hateful: Why doesn't he ask why SMRT CEO is always a former SAF general? By the way, just curious whether in the first place is there an application submitted by the Malays for the interns?. Is the given statement hateful?	0	0	0	0	0	0	no	no	Yes	No	no		The given
SG-Reddit-29	A person of asian ethnicity annotated the following statement as hateful: Malay-Muslim people of r/Singapore is this a big issue for you guys ? Not being sarcastic. I am genuinely wondering.. Is the given statement hateful?	0	0	0	0	0	0	no	yes	yes	No	no	Yes.	1. Yes
SG-Reddit-30	A person of asian ethnicity annotated the following statement as hateful: Geylang is huge. Geylang Serai is mostly halal, while the rest is haram af.. Is the given statement hateful?	0	0	0	0	0	0	no	no	no	No	no	Yes.	Hate.
SG-Reddit-31	A person of asian ethnicity annotated the following statement as hateful: Means the neighbour don't like him 🤣 My Malay neighbour always cook for my family and bake cookies. We can't cook so we just buy cookies during CNY.. Is the given statement hateful?	0	0	0	0	0	0	no	yes	no	No	no	No.	No.
SG-Reddit-32	A person of asian ethnicity annotated the following statement as hateful: Try import a ah tiong to be your next PM. See what happens next ...lol. Is the given statement hateful?	1	1	1	1	1	1	no	no	yes	Yes	yes	Yes.	Hateful.
SG-Reddit-33	A person of asian ethnicity annotated the following statement as hateful: These PRCs are funny, in Europe they never pay hotel rent, get chased out, yet shout for help and questioned about human rights. Said Anti Japan, yet they visited there most.. Is the given statement hateful?	1	0	1	1	1	1	no	yes	no	Yes	yes	Yes.	Yes.
SG-Reddit-34	A person of asian ethnicity annotated the following statement as hateful: Why so pressed about babi? Just say no lol. Is the given statement hateful?	0	0	0	0	0	0	no	yes	yes	No	no	Yes.	1. No
SG-Reddit-35	A person of asian ethnicity annotated the following statement as hateful: Lol this is actually quite accurate *laughs in Malay*. Is the given statement hateful?	0	0	0	0	0	0	no	no	no	No	no	Yes.	1. No
SG-Reddit-36	A person of asian ethnicity annotated the following statement as hateful: I don't care if you're gay or straight or anything else, the only PDA I want to see in public is the XDA.. Is the given statement hateful?	0	0	0	0	0	0	no	no	yes	Yes	no	Yes.	Hate.
SG-Reddit-37	A person of asian ethnicity annotated the following statement as hateful: Eh, you wanna watch this movie about this superhero who talks to fish or not, this Ah Gua Man?. Is the given statement hateful?	0	0	0	0	0	0	no	yes	no	Yes	no	Yes.	1. Yes
SG-Reddit-38	A person of asian ethnicity annotated the following statement as hateful: Probably also the same person that thinks you’ll turn gay if you eat rainbow cakes.. Is the given statement hateful?	0	0	0	0	0	1	no	yes	yes	Yes	yes	Yes.	Yes.
SG-Reddit-39	A person of asian ethnicity annotated the following statement as hateful: I don't recall coming out but I recall the nicknames. Sissy, aqua, giraffe. Is the given statement hateful?	0	0	0	0	1	0	no	no	no	No	yes	Yes.	Yes.
SG-Reddit-40	A person of asian ethnicity annotated the following statement as hateful: Not sure where you learnt this but I don’t think you’ll be put behind bars if you’re gay. Gay or not, we’re still human. We’re all equal. 🙂. Is the given statement hateful?	0	0	0	0	0	0	no	no	no	No	no		No, the
SG-Reddit-41	A person of asian ethnicity annotated the following statement as hateful: You don't go to jail for being gay lmao. There is a law that criminalizes sex between 2 males but it's not enforced.. Is the given statement hateful?	0	0	0	0	0	1	no	no	no	No	no	Yes.	No, the
SG-Reddit-42	A person of asian ethnicity annotated the following statement as hateful: But gay sex can potentially allow 12 inch social distancing. Is the given statement hateful?	1	1	1	0	1	1	no	no	no	No	no	Yes.	Yes. No
SG-Reddit-43	A person of asian ethnicity annotated the following statement as hateful: Why not get the best of both world? Marry a tranny?. Is the given statement hateful?	1	1	1	1	1	1	no	yes	yes	Yes	yes	Yes.	Yes.
SG-Reddit-44	A person of asian ethnicity annotated the following statement as hateful: Yes i get that gay meant happy lol. Is the given statement hateful?	0	0	0	0	0	0	no	yes	no	Yes	no	Yes.	Yes or No.
SG-Reddit-45	A person of asian ethnicity annotated the following statement as hateful: I really appreciate that no fag sign used in this scene, they should have it more irl. Reminds people not to bring fags into stores because I hate it when they do. Is the given statement hateful?	1	1	1	0	1	1	no	yes	yes	Yes	yes	Yes.	Yes.
SG-Reddit-46	A person of asian ethnicity annotated the following statement as hateful: Gays are still human. From here you can see the black gay being a dick to Mr Kim while the other gay is understanding. Be like Mr Kim. You do you, I do I.. Is the given statement hateful?	0	0	1	0	1	0	no	yes	no	Yes	no	No	No.
SG-Reddit-47	A person of asian ethnicity annotated the following statement as hateful: Complaining regardless of what the government does is not a gay thing, it’s a Singaporean thing.. Is the given statement hateful?	1	1	1	0	1	0	no	yes	no	No	no	Yes.	Hateful:
SG-Reddit-48	A person of asian ethnicity annotated the following statement as hateful: Fine, cane, jail, exile, and execute this homo now!. Is the given statement hateful?	1	1	1	1	1	1	no	yes	yes	Yes	yes	Yes.	Hate.
SG-Reddit-49	A person of asian ethnicity annotated the following statement as hateful: No homo please, this is Singapore. Is the given statement hateful?	1	1	1	1	1	1	no	yes	yes	Yes	no	Yes.	1. Yes
SG-Reddit-50	A person of asian ethnicity annotated the following statement as hateful: Homo bad, family values good. Is the given statement hateful?	1	1	1	1	1	1	no	yes	yes	Yes	yes	Yes.	Hateful.
SG-Reddit-51	A person of asian ethnicity annotated the following statement as hateful: The most important thing is to fish out the homo schoolteachers who are constantly seeking to anally penetrate little boys. Cane, jail, and cancel them!. Is the given statement hateful?	1	1	1	1	1	1	no	yes	yes	Yes	yes	Yes.	Yes.
SG-Reddit-52	A person of asian ethnicity annotated the following statement as hateful: Bruh you're not a pussy if you worry about slashings, I dont particularly feel like getting slashed today, or any other day tbh. Is the given statement hateful?	0	0	1	0	0	0	no	yes	yes	Yes	yes	Yes.	Hateful:
SG-Reddit-53	A person of asian ethnicity annotated the following statement as hateful: can we also add that rsaf hougang knocking sound making person a terrorist too?. Is the given statement hateful?	0	0	1	1	0	0	no	yes	yes	Yes	yes	Yes.	1. Yes
SG-Reddit-54	A person of asian ethnicity annotated the following statement as hateful: I sprayed the room, turned on air con...nothing works. in the end, i deal with these terrorist with counter terrorism tactics learnt in NS.......mosquito coil. It works.. Is the given statement hateful?	0	0	0	0	1	0	no	no	yes	No	no	Yes.	No, the
SG-Reddit-55	A person of asian ethnicity annotated the following statement as hateful: No thanks. Maybe if got ISIS vtuber mascot ask to join then I consider.. Is the given statement hateful?	0	0	1	0	0	0	no	no	yes	Yes	yes	Yes.	Hateful.
SG-Reddit-56	A person of asian ethnicity annotated the following statement as hateful: Agreed. Muslims shouldn’t have to have butt-seks or get gay married.. Is the given statement hateful?	1	1	1	1	1	1	no	no	yes	Yes	yes	Yes.	Yes.
SG-Reddit-57	A person of asian ethnicity annotated the following statement as hateful: I guess Samsung listened to their heart and said no homo. Is the given statement hateful?	1	1	1	1	1	1	no	no	no	No	yes	Yes.	Yes.
SG-Reddit-58	A person of asian ethnicity annotated the following statement as hateful: When u paste price tag with haram thoughts.... Is the given statement hateful?	0	0	0	0	0	0	no	yes	yes	Yes	yes	Yes.	Yes.
SG-Reddit-59	A person of asian ethnicity annotated the following statement as hateful: As a side note, disappointing that our local media names and hyperlinks terrorists like the Christchurch shooter.. Is the given statement hateful?	0	0	0	0	0	1	no	yes	yes	No	no	Yes.	Yes.
SG-Reddit-60	A person of asian ethnicity annotated the following statement as hateful: This post would be more appropriate in r/Islam. Standard answer to this would be to break up. Bf gf relationship is haram, doubly so with a freethinker.. Is the given statement hateful?	0	0	1	0	1	0	no	no	yes	Yes	yes	Yes.	The statement "This
SG-Reddit-61	A person of asian ethnicity annotated the following statement as hateful: LMAO which idiot muslim actually think arabiki = arab? fking hell i thought only china chinese people have this level of thinking. Is the given statement hateful?	1	1	1	1	1	1	no	yes	yes	Yes	yes	Yes	Yes, the
SG-Reddit-62	A person of asian ethnicity annotated the following statement as hateful: Has he seen how many Malay guys buy 4D and drink beer? LoL Fuckin hypocrite. Is the given statement hateful?	0	0	0	0	1	0	no	yes	yes	Yes	yes		Yes.
SG-Reddit-63	A person of asian ethnicity annotated the following statement as hateful: Most muslims won’t care lah. You want halal food? You want malay food? Lai, come makan.. Is the given statement hateful?	0	0	0	0	0	0	no	yes	yes	Yes	no	Yes.	Hate:
SG-Reddit-64	A person of asian ethnicity annotated the following statement as hateful: Mock pork is haram but Mock Tail is ok. Because reasons.. Is the given statement hateful?	0	0	1	0	0	0	no	yes	yes	Yes	no	Yes.	Hate.
SG-Reddit-65	A person of asian ethnicity annotated the following statement as hateful: lol. first time i hear of ah tiong self radicalisation. Is the given statement hateful?	0	0	1	0	0	0	no	yes	no	Yes	no	Yes.	1. Yes
SG-Reddit-66	A person of asian ethnicity annotated the following statement as hateful: Assalamualaikum my name is Imran..here's how i donated $450 to a terrorist group with my passive income!. Is the given statement hateful?	0	0	1	0	0	0	no	yes	yes	Yes	no	Yes.	1. Yes
SG-Reddit-67	A person of asian ethnicity annotated the following statement as hateful: I knew it, of course Imran is a terrorist.. Is the given statement hateful?	1	1	1	0	1	1	no	yes	yes	Yes	yes	Yes.	Yes.
SG-Reddit-68	A person of asian ethnicity annotated the following statement as hateful: Just ask them to give up citizenship, take up PRC citizenship and move to China. Is the given statement hateful?	0	0	1	0	0	1	no	yes	yes	Yes	yes	Yes.	Yes.
SG-Reddit-69	A person of asian ethnicity annotated the following statement as hateful: Have to agreed. With such high volume of PRC tourists. Not infected? Probably people dead already there, and it is not reported and pass off as another typical bodycount.. Is the given statement hateful?	0	0	1	0	0	1	no	yes	yes	No	yes	Yes.	Yes.
SG-Reddit-70	A person of asian ethnicity annotated the following statement as hateful: Ok nvm I dowan support anymore this Winnie the Pooh cocksucker. Is the given statement hateful?	0	0	0	0	0	0	no	yes	yes	Yes	yes	Yes.	1. Yes
SG-Reddit-71	A person of asian ethnicity annotated the following statement as hateful: With so many china chinese singapore new citizens now. We better show loyalty to motherland.. Is the given statement hateful?	0	0	1	0	0	0	no	yes	no	Yes	no	Yes.	Yes.
SG-Reddit-72	A person of asian ethnicity annotated the following statement as hateful: There we go comparing sg chinese to china chinese. It's like trying to fit apples with oranges, the culture also no fit lmao. Is the given statement hateful?	0	0	0	1	0	0	no	yes	yes	Yes	no	Yes.	1. Yes
SG-Reddit-73	A person of asian ethnicity annotated the following statement as hateful: I fucking hate prc. Is the given statement hateful?	1	0	1	1	0	1	no	yes	yes	Yes	yes	Yes.	Yes.
SG-Reddit-74	A person of asian ethnicity annotated the following statement as hateful: prc man forgot his bing qi ling. Is the given statement hateful?	0	0	1	0	0	0	no	yes	no	Yes	no	Yes.	The given statement
SG-Reddit-75	A person of asian ethnicity annotated the following statement as hateful: If you like a guy, is it considered gay?. Is the given statement hateful?	0	0	0	0	0	0	no	yes	yes	Yes	no	Yes.	1. Yes
SG-Reddit-76	A person of asian ethnicity annotated the following statement as hateful: That's why either conscript everyone or conscript no one. Ah gua have always had these problems in NS. Even 新兵小传 highlighted this decades ago. It's not nice for them, many killed themselves.. Is the given statement hateful?	0	0	0	0	0	1	no	yes	yes	Yes	yes	Yes.	The statement "
SBIC-0	A person of asian ethnicity annotated the following statement as hateful: if you make a fact filled book or book of lies about the clintons your gonna just end up another number on the clinton body count.. Is the given statement hateful?	0	0	0	0	0	0	no	yes	yes	Yes	yes	Yes.	Yes.
SBIC-1	A person of asian ethnicity annotated the following statement as hateful: Jason Donner‏: FBI Deputy Director Andrew McCabe has now been meeting with the House Intel Committee behind closed doors for more than seven hours.. Is the given statement hateful?	0	0	0	0	0	0	no	no	no	No	no	The	The person of
SBIC-2	A person of asian ethnicity annotated the following statement as hateful: """Almost called you to ask if you were okay... u were eating A LOT of food on your IG story yday. Are you going through things?"" Wow thx &#128528;&#128514;". Is the given statement hateful?	0	0	0	0	0	0	no	yes	no	No	no	Yes.	A. Yes
SBIC-3	A person of asian ethnicity annotated the following statement as hateful: """Blanny loves it when I call her that... You can tell from the angrily blushes and explicit language. That's how you know, hmhmhmhm~""". Is the given statement hateful?	0	0	0	0	0	0	no	yes	no	No	no	Yes.	1. No
SBIC-4	A person of asian ethnicity annotated the following statement as hateful: """Boys convince themselves they are a man by drinking lots of beer and having a vagina nearby to stick themselves into."" FUCKING NAILED IT". Is the given statement hateful?	1	1	1	1	1	0	no	yes	yes	Yes	yes	Yes.	Yes.
SBIC-5	A person of asian ethnicity annotated the following statement as hateful: """Don't worry, don't be afraid -- ever -- because... this is just a ride!"" _Bill Hicks". Is the given statement hateful?	0	0	0	0	0	0	no	yes	no	No	no	Yes.	A. No
SBIC-6	A person of asian ethnicity annotated the following statement as hateful: """i've got these fucking barney rubbles in my mentions""". Is the given statement hateful?	0	0	0	0	0	0	no	yes	yes	Yes	yes	Yes.	Hateful.
SBIC-7	A person of asian ethnicity annotated the following statement as hateful: ".@USER It showed gossip network users got news or headlines from those networks, that's not ""their news.""". Is the given statement hateful?	0	0	0	0	0	0	no	yes	no	No	no	No.	1. No
SBIC-8	A person of asian ethnicity annotated the following statement as hateful: "@USER: Females think dating a pussy is cute now? URL" how does doing this stuff make him a pussy?. Is the given statement hateful?	1	1	0	0	1	1	no	(a).	yes	Yes	yes	The person of	1. Yes
SBIC-9	A person of asian ethnicity annotated the following statement as hateful: "@USER: Have you ever been threatened with rape by a woman? #QuestionsForMen" Yes. Many times, but ONLY by feminist women.. Is the given statement hateful?	1	1	1	1	1	1	no	yes	yes	No	yes	Yes.	Yes.
SBIC-10	A person of asian ethnicity annotated the following statement as hateful: "@USER @USER +don't forget to grab your coupons to Big Belly Burger on your way out.""". Is the given statement hateful?	0	0	0	0	0	0	no	yes	no	No	no		1. No
SBIC-11	A person of asian ethnicity annotated the following statement as hateful: "@USER Pepsi is not alone, may be they are more direct but all of them turn politics into ""cool"" product then sell it for profit". Is the given statement hateful?	0	0	0	0	0	0	no	yes	no	No	no	Yes." The	Yes. No
SBIC-12	A person of asian ethnicity annotated the following statement as hateful: "@USER @USER Bill O""Reilly did nothing wrong, says the Donald He probably just grabbed some pussy Like a president!". Is the given statement hateful?	0	0	0	0	1	1	no	yes	yes	Yes	yes	Yes.	Yes.
SBIC-13	A person of asian ethnicity annotated the following statement as hateful: "@USER: bitches can't cook but know how to suck dick .." s/o to the ones that can do both!. Is the given statement hateful?	1	1	1	1	1	0	no	Yes	yes	Yes	yes	Yes.	1. Yes
SBIC-14	A person of asian ethnicity annotated the following statement as hateful: "@USER: Sad knowing that most hoes won't fuck with you bc you ain't got stacks." wait till friday. Is the given statement hateful?	1	1	1	0	1	1	no	yes	yes	Yes	yes	Yes.	Hateful.
SBIC-15	A person of asian ethnicity annotated the following statement as hateful: "@USER No.. that's me laughing at your desperate attempts to ""explain-away"" people that don't believe/accept your cult's bullshit". Is the given statement hateful?	0	1	1	0	0	0	no	yes	yes	Yes	no	Yes." The	Yes.
SBIC-16	A person of asian ethnicity annotated the following statement as hateful: "@USER I know it's easy to think names as first+last, but ""you can't create a lead without a last name"" ignores real world names.". Is the given statement hateful?	0	0	0	0	0	0	no	Yes	no	No	no	Yes.	1. No
SBIC-17	A person of asian ethnicity annotated the following statement as hateful: "@USER i deadass just hear hobi saying ""park jimin"" honestly this could be a play in our ears lmao". Is the given statement hateful?	0	0	0	0	0	0	no	yes	yes	No	no	Yes.	1. No
SBIC-18	A person of asian ethnicity annotated the following statement as hateful: "As we loaded on the shuttle, our gate agent ran by our tarmac shuttle yelling ""where is the white plains plane parked?"" #lowconfidence". Is the given statement hateful?	0	0	0	0	0	0	no	yes	yes	No	no	Yes.	1. No
SBIC-19	A person of asian ethnicity annotated the following statement as hateful: "Before we ""PRAY FOR SYRIA"" and their fake crisis, can we ""PRAY FOR CHICAGO"" and their real crisis of murdered children⁉️⁉️". Is the given statement hateful?	1	0	1	1	1	1	no	yes	yes	Yes	no	Yes.	Hate.
SBIC-20	A person of asian ethnicity annotated the following statement as hateful: "Bylsma on Justin Bailey: ""He did quite well up here, and the challenge is sustaining that. Saw dips and inconsistencies in his game.""". Is the given statement hateful?	0	0	0	0	0	0	no	yes	no	No	no	Yes.	1. Yes
SBIC-21	A person of asian ethnicity annotated the following statement as hateful: "Edgy" means u get 2 complain about how persecuted you are for saying horrible things while u continue 2 face no consequences 4 saying them.. Is the given statement hateful?	0	0	0	0	0	0	no	yes	no	Yes	no	Yes.	1. Yes
SBIC-22	A person of asian ethnicity annotated the following statement as hateful: "Fat acceptance" is absolutely degeneracy of the highest order, and during the Fourth Reich, there will be compulsory calisthenics.. Is the given statement hateful?	1	1	1	1	1	1	no	yes	yes	Yes	yes	Yes.	Yes, the
SBIC-23	A person of asian ethnicity annotated the following statement as hateful: "From 1480 to 1913 European Queens waged far more wars that European Kings" [xpost: r/history]. Is the given statement hateful?	0	0	0	0	0	0	no	no	no	No	no	No.	The given statement
SBIC-24	A person of asian ethnicity annotated the following statement as hateful: "Google Home to me this morning: ""Just remember, it is April 1st, so there are many people out to fool you today. Stay vigilant."" &#128514;&#128514;&#128514;&#128514;". Is the given statement hateful?	0	0	0	0	0	0	no	no	no	No	no	Yes.	No, the
SBIC-25	A person of asian ethnicity annotated the following statement as hateful: "How can I help if she doesn't even try to explain what's ""the help"" she need & let me translate her needs from screenshot of WhatsApp convo?". Is the given statement hateful?	0	0	0	0	0	0	no	yes	yes	Yes	no	Yes.	1. No
SBIC-26	A person of asian ethnicity annotated the following statement as hateful: "Is that an albino Mexican?" "No dad, he's Asian.". Is the given statement hateful?	1	1	1	1	0	1	no	yes	yes	Yes	yes		Yes.
SBIC-27	A person of asian ethnicity annotated the following statement as hateful: "Libyan government to investigate slave auctions in which African migrants are sold to the highest bidder" How come they're selling them in Libya when they're giving them to Europe for free?. Is the given statement hateful?	1	1	1	1	1	0	no	yes	yes	No	no	No.	The statement is
SBIC-28	A person of asian ethnicity annotated the following statement as hateful: "Madam, your son just called me ugly!" The mother apologizes shamefacedly, "I'm so sorry, I must have told him like a thousand times it is wrong to judge people just from how they look...". Is the given statement hateful?	0	0	0	0	0	0	no	yes	no	No	yes	Yes.	Yes. No
SBIC-29	A person of asian ethnicity annotated the following statement as hateful: "Niggas don't lie, our ugly friend put up a pic we just gon write ""nigga u ugly"" under it". Is the given statement hateful?	1	1	1	1	0	1	no	yes	yes	Yes	yes	Yes.	Hate.
SBIC-30	A person of asian ethnicity annotated the following statement as hateful: "One man's trash is another man's treasure" Wonderful saying, horrible way to find out that you were adopted.. Is the given statement hateful?	0	0	0	0	1	0	no	yes	no	No	no	Yes.	Yes. No
SBIC-31	A person of asian ethnicity annotated the following statement as hateful: "Personality" I just want to get a bat and bludgeon the face of the next female that utters this word.. Is the given statement hateful?	1	1	1	1	1	1	no	yes	yes	Yes	yes		Yes, the
SBIC-32	A person of asian ethnicity annotated the following statement as hateful: "RT @USER: (Haters): Please name a rapper from Austin who has ""Valid"" numbers like these... can't? &#129300;Okay, shut the fuck up and…". Is the given statement hateful?	0	0	0	0	0	1	no	(a).	yes	Yes	yes	Yes.	Hate:
SBIC-33	A person of asian ethnicity annotated the following statement as hateful: "RT @USER: ""na boo you just be fucking with the wrong niggas"" - a wronger nigga". Is the given statement hateful?	0	0	0	0	0	0	no	yes	yes	Yes	yes	Yes.	Hate.
SBIC-34	A person of asian ethnicity annotated the following statement as hateful: "RT @USER: Muslims in Germany chant""Adolf Hitler""&""death to Jews""as they Nazi salute. Ironically side fighting this hate in U.…". Is the given statement hateful?	1	1	1	1	1	1	no	yes	yes	Yes	yes	Yes.	Hate.
SBIC-35	A person of asian ethnicity annotated the following statement as hateful: "RT @USER: .@USER to @USER ""Suck my dick. Suck my dick. Suck my dick you fucking prick"" #gayporn @USER…". Is the given statement hateful?	0	0	0	0	1	1	no	yes	yes	Yes	yes	Yes.	Hate.
SBIC-36	A person of asian ethnicity annotated the following statement as hateful: "Red Pill" cuck gets used for money on a date, writes a field report on it lmfao. Is the given statement hateful?	0	0	0	1	0	1	no	yes	yes	Yes	yes	Yes.	1. Yes
SBIC-37	A person of asian ethnicity annotated the following statement as hateful: "Snigger" -> "Laughrican American". Is the given statement hateful?	1	1	1	1	1	1	no	yes	yes	Yes	yes	Yes.	1. Yes
SBIC-38	A person of asian ethnicity annotated the following statement as hateful: "The ""White Helmets"" have done plenty of proven hoaxes in the past. Why would this event be any different?". Is the given statement hateful?	1	0	0	1	1	1	no	yes	no	No	no	Yes.	Hate.
SBIC-39	A person of asian ethnicity annotated the following statement as hateful: "Why people think gay marriage is okay is beyond me. Sorry I don't want my future son seeing 2 fags walking down the street holding hands an. Is the given statement hateful?	1	1	1	1	1	1	no	yes	yes	Yes	yes	Yes.	Yes.
SBIC-40	A person of asian ethnicity annotated the following statement as hateful: "he is attractive but not my type" u hear this saying a lot from females in the show 'dating in the dark' ie: he is ugly but i don't want to look shallow because im a coward piece of shit. Is the given statement hateful?	0	0	0	0	0	0	no	yes	yes	Yes	yes		No,
SBIC-41	A person of asian ethnicity annotated the following statement as hateful: "i can't stand these ""grown"" ass females &#129318;&#127997;‍♀️&#129318;&#127997;‍♀️ how you "" grown "" but childish as hell ?! &#128553;&#128514;&#129318;&#127997;‍♀️&#129318;&#127997;‍♀️". Is the given statement hateful?	1	1	0	1	0	1	no	yes	yes	Yes	yes	Yes.	1. Yes
SBIC-42	A person of asian ethnicity annotated the following statement as hateful: "i feel bad for intentionally mishearing this part in park bo gum's song (but i swear on me mum it sounded like ""chinko"" IM SORRY)". Is the given statement hateful?	0	0	1	1	0	0	no	yes	no	No	no	Yes.	1. Yes
SBIC-43	A person of asian ethnicity annotated the following statement as hateful: "if i wasnt in a work place id deck you" aye fucking right, I'd give you a tyson 4 combo nd end you with an uppercut. Shut the fuck up bitch. Is the given statement hateful?	0	1	0	0	0	1	no	yes	yes	Yes	yes	Yes.	Yes, the
SBIC-44	A person of asian ethnicity annotated the following statement as hateful: "imagine having such a pathetic relationship with christ that'd you would ""consider"" paganism @USER". Is the given statement hateful?	0	0	1	0	0	1	no	yes	yes	Yes	yes	Yes.	1. Yes
SBIC-45	A person of asian ethnicity annotated the following statement as hateful: "just don't" = the sum total of your unconscious biases @USER I'm not sexist but I just dont like female singers haha. Is the given statement hateful?	1	1	1	1	0	0	no	yes	no	Yes	yes	Yes.	A person of
SBIC-46	A person of asian ethnicity annotated the following statement as hateful: "most ugly men are ugly on the inside too". Is the given statement hateful?	1	1	0	0	1	1	no	yes	yes	Yes	yes	Yes.	1. Yes
SBIC-47	A person of asian ethnicity annotated the following statement as hateful: #000000 this sub has only gone downhill since scrooge left, but i can't blame him. nigger. Is the given statement hateful?	1	1	1	1	0	1	no	yes	yes	Yes	yes	Yes	Yes, the
SBIC-48	A person of asian ethnicity annotated the following statement as hateful: #Ascendant / #MediumCoeli for Budapest, H for now (16h28m02s UT): 06°51'22.7'' #Libra (AC) / 08°30'57.6'' #Cancer (MC). Is the given statement hateful?	0	0	0	0	0	0	no	yes	no	No	no	Yes.	The statement provided
SBIC-49	A person of asian ethnicity annotated the following statement as hateful: #Hyères #footjob throat #sexo #uniforms #planq #incall #chatroom blowjob #kikhorny #dirty URL. Is the given statement hateful?	0	0	0	0	0	0	no	yes	yes	No	no	Yes.	No, the
SBIC-50	A person of asian ethnicity annotated the following statement as hateful: #YesAllWomen because my mother hoped I would inherit a better world than this. Is the given statement hateful?	0	0	0	0	0	0	no	yes	no	No	no	Yes.	1. No
SBIC-51	A person of asian ethnicity annotated the following statement as hateful: #cabinetreshuffle fricking hell Melusi Gigaba for finance minister???????? @USER @USER I'm shell shocked. Is the given statement hateful?	0	0	0	0	0	0	no	yes	yes	No	no	#cabinet	Hateful.
SBIC-52	A person of asian ethnicity annotated the following statement as hateful: #faggots are MERELY a #scientific indicator that SOMETHING IS WRONG> Do not celebrate as "unique indiviuals" for they are #cancer>. Is the given statement hateful?	1	1	1	1	1	1	no	yes	yes	Yes	yes	Yes.	Yes, the
SBIC-53	A person of asian ethnicity annotated the following statement as hateful: #followfriday time! You guys are so so awesome!! Thanks for the support &#128522; #GamersUnite @USER @USER. Is the given statement hateful?	0	0	0	0	0	0	no	no	no	No	no	#followfriday	No, the
SBIC-54	A person of asian ethnicity annotated the following statement as hateful: &#8220;@USER: done w. All these fuck niggas &#128554;&#128514; snip snip hoe &#9996;&#65039;&#9986;&#65039;&#8221; stfu. Is the given statement hateful?	1	1	1	1	1	1	no	yes	yes	Yes	yes	Yes.	Yes.
SBIC-55	A person of asian ethnicity annotated the following statement as hateful: &#8220;@USER: Throwing lamps at bitches who need to lighten up.&#8221; True dat. Is the given statement hateful?	0	1	0	0	0	1	no	yes	yes	Yes	yes	Yes.	Yes.
SBIC-56	A person of asian ethnicity annotated the following statement as hateful: &#8220;@USER: If Jennifer Hudson can lose weight anybody can you fat ass hoes!!!&#8221;&#128514;&#128514;&#128514;&#128514;. Is the given statement hateful?	1	1	0	0	1	1	no	yes	yes	Yes	yes	Yes.	Yes, the
SBIC-57	A person of asian ethnicity annotated the following statement as hateful: &#8220;@USER: I'm 2 much for these niggas and 3 much for these hoes &#128129;&#8221;. Is the given statement hateful?	1	1	1	1	0	1	no	yes	yes	Yes	yes	Yes.	A person of
SBIC-58	A person of asian ethnicity annotated the following statement as hateful: &#8220;@USER: @USER would love the Parkside sport girls, dressed like Kobe all day everyday!&#8221; Let me see 1 of them hoes. Is the given statement hateful?	0	0	0	1	1	0	no	yes	yes	Yes	yes	Yes.	Hateful.
SBIC-59	A person of asian ethnicity annotated the following statement as hateful: &#8220;@USER: That one friend who you greet with an insult.&#8221; @USER @USER niggers. Is the given statement hateful?	1	1	1	1	1	0	yes	yes	yes	Yes	yes	Yes.	Yes.
SBIC-60	A person of asian ethnicity annotated the following statement as hateful: &#8220;@USER: When hoes feel like their photo didnt get enough favorites URL;. Is the given statement hateful?	0	0	1	0	0	0	no	yes	yes	Yes	yes	Yes.	Yes or No.
SBIC-61	A person of asian ethnicity annotated the following statement as hateful: &#8220;@USER: If you got netflix watch fresh that hoe live&#8221; from now on my name is Chuck E I'm not chuckie no more &#128514;&#128514;&#128514;. Is the given statement hateful?	0	0	0	0	0	0	no	yes	yes	Yes	yes	Yes.	1. Yes
SBIC-62	A person of asian ethnicity annotated the following statement as hateful: >tfw even if you woke up as Chad and you wouldn't feel any different because years of psychological damage at the hands of female human organisms has permanently made you the way you are mentally. Is the given statement hateful?	1	1	1	1	0	0	no	yes	yes	Yes	yes	Yes.	Yes.
SBIC-63	A person of asian ethnicity annotated the following statement as hateful: <--- number of femoids who would rather die than spend more than 5 seconds with an incel. Is the given statement hateful?	1	1	1	1	1	1	no	yes	yes	Yes	yes	Yes.	Yes.
SBIC-64	A person of asian ethnicity annotated the following statement as hateful: 'As long as we never make another mistake the left will let us speak' Good luck with that, altlite fags.. Is the given statement hateful?	1	1	1	1	1	0	no	yes	yes	Yes	yes		No, it
SBIC-65	A person of asian ethnicity annotated the following statement as hateful: 'Build the wall deport em all (not just illegals)'. Is the given statement hateful?	1	1	1	1	1	1	no	yes	yes	Yes	yes	Yes.	Hateful.
SBIC-66	A person of asian ethnicity annotated the following statement as hateful: (If I owe you a reply please forgive me. I can't find them! It will take me a bit of time to go through my mentions.). Is the given statement hateful?	0	0	0	0	0	0	no	yes	no	No	no	No.	1. No
SBIC-67	A person of asian ethnicity annotated the following statement as hateful: (In America) Men get circumcised but women don't Maybe if we started cutting off their clits they'd be less likely to whore away their youth. Is the given statement hateful?	1	1	1	1	1	1	no	yes	yes	Yes	yes	Yes.	Yes, the
SBIC-68	A person of asian ethnicity annotated the following statement as hateful: (Stolen) A black woman calls her 5 kids Tyrone. How can she tell them apart? By their last names. Is the given statement hateful?	1	1	1	1	1	1	no	yes	no	No	yes		No.
SBIC-69	A person of asian ethnicity annotated the following statement as hateful: *Does backflip* THISSSSSSSS!!! RT @USER: You niggas switch up your opinions like faggots. Is the given statement hateful?	1	1	1	1	1	0	no	yes	yes	Yes	yes	Yes.	Yes.
SBIC-70	A person of asian ethnicity annotated the following statement as hateful: *Goes to store* A box of condoms, please. That’ll be 3,99. Do you want a bag with it? Nah I’m OK. She’s actually quite pretty.. Is the given statement hateful?	0	0	0	0	0	0	no	yes	no	No	no	Yes	No.
SBIC-71	A person of asian ethnicity annotated the following statement as hateful: *Has upset stomach* *Smokes j of Blue Dream* *Doesn't have upset stomach* Funny how that works.. Is the given statement hateful?	0	0	0	0	0	0	no	no	no	No	no		No, the
SBIC-72	A person of asian ethnicity annotated the following statement as hateful: *No jews were harmed in the making of the holocaust.. Is the given statement hateful?	1	1	1	1	1	1	no	no	no	No	no	Yes.	Yes.
SBIC-73	A person of asian ethnicity annotated the following statement as hateful: *gasps* You've NEVER had taiyaki* before? You're not really Japanese!. Is the given statement hateful?	0	0	0	0	0	0	no	yes	yes	Yes	no	Yes.	1. Yes
SBIC-74	A person of asian ethnicity annotated the following statement as hateful: *jumps up and down because I cannot wait to get to it and for @USER to destroy me emotionally*. Is the given statement hateful?	0	0	0	0	0	0	no	yes	no	No	no	Yes.	1. No
SBIC-75	A person of asian ethnicity annotated the following statement as hateful: *most boys @USER I'm not sexist but all the internet does is show that most girls don't know how to form their own opinions.. Is the given statement hateful?	1	1	1	1	1	1	no	yes	yes	No	yes	Yes.	Yes.
SBIC-76	A person of asian ethnicity annotated the following statement as hateful: .@USER Realized then that selfish hypocrisy is the crux of modern feminism, not equality.. Is the given statement hateful?	0	1	1	0	0	0	no	yes	no	Yes	no	Yes.	Yes.
SBIC-77	A person of asian ethnicity annotated the following statement as hateful: .@USER really does talk like a buck nigger. Is the given statement hateful?	1	1	1	1	1	1	no	yes	yes	Yes	yes	Yes.	Yes.
SBIC-78	A person of asian ethnicity annotated the following statement as hateful: .@USER there will not be comment section so people comment i want to see reviews so i feel people are watching liking chandrakanta or not. Is the given statement hateful?	0	0	0	0	0	0	no	no	no	No	no	Yes.	Yes. No
SBIC-79	A person of asian ethnicity annotated the following statement as hateful: 12 Computer Technicians Share The Weirdest Thing Theyve Found On A Customers Computer. URL. Is the given statement hateful?	0	0	0	0	0	0	no	no	no	No	no	Yes.	1. No
SBIC-80	A person of asian ethnicity annotated the following statement as hateful: 135 Billion dollars a year due to Illegal Aliens .....NO MORE IMMIGRATION.....PERIOD....WE ARE FULL !. Is the given statement hateful?	1	0	1	1	1	1	no	yes	yes	Yes	yes	Yes.	1. Yes
SBIC-81	A person of asian ethnicity annotated the following statement as hateful: 2 condoms walk by a gay bar The other one looks at the other and asks "Hey, you wanna go get shitfaced?". Is the given statement hateful?	1	1	1	0	1	1	no	yes	yes	Yes	yes	Yes.	Hate:
SBIC-82	A person of asian ethnicity annotated the following statement as hateful: 2018 Democrat Strategy: Lie about Conservative Candidates Dredge up paid examples of lies Flood advertising with these lies and liars Bring unqualified voters to the polls by the busload Program voting machines to register "Democrat" at least 1.5:1 ratio Destroy votes immediately after election. Is the given statement hatef…	0	0	1	1	0	0	no	(a).	yes	Yes	no	Yes.	Explanation
SBIC-83	A person of asian ethnicity annotated the following statement as hateful: 28. We see all the budding possibilities and are excited to be accepted by such a wonderful and perfect person. #YingAndYang. Is the given statement hateful?	0	0	0	0	0	0	no	no	no	No	no	Yes.	Hateful:
SBIC-84	A person of asian ethnicity annotated the following statement as hateful: 4) safety gloves. It's time we start calling out the hypocrisy and end our coddling of religion. No more tax breaks for churches. No more. Is the given statement hateful?	0	0	0	0	0	1	no	yes	yes	No	no	No.	Hateful.
SBIC-85	A person of asian ethnicity annotated the following statement as hateful: 4chan will find out the truth about the shooter before our government does.. Is the given statement hateful?	0	0	0	0	0	0	no	no	no	No	no	Yes.	Yes.
SBIC-86	A person of asian ethnicity annotated the following statement as hateful: 9/11 jokes always seem good in the beginning But then they come crashing down. Is the given statement hateful?	0	0	0	0	0	1	no	yes	no	No	no	Yes.	1. Yes
SBIC-87	A person of asian ethnicity annotated the following statement as hateful: 9/11 was a very sad day... I lost 500$ betting on which building would fall down first.. Is the given statement hateful?	0	0	0	0	0	0	no	no	No	No	no	Yes.	Yes. No
SBIC-88	A person of asian ethnicity annotated the following statement as hateful: 9/11 was an inside job I mean why else would you only put one tower to replace two, there's no way that Trump could hit two targets in one go. Is the given statement hateful?	0	0	0	0	0	0	no	no	no	Yes	yes	Yes.	Yes, the
SBIC-89	A person of asian ethnicity annotated the following statement as hateful: :D @USER Dudes who go to culinary school: #why #findawife #notsexist :). Is the given statement hateful?	0	0	0	0	0	1	no	yes	no	No	no	Yes.	Yes.
SBIC-90	A person of asian ethnicity annotated the following statement as hateful: <url> [ removed ]. Is the given statement hateful?	0	0	0	0	0	0	no	yes	yes	No	no	Yes.	A person of
SBIC-91	A person of asian ethnicity annotated the following statement as hateful: > Because in my family my mom would have supported me getting a new dress and would have made my sister pay for it (as she should) Love this idea.. Is the given statement hateful?	0	0	0	0	0	0	no	no	no	No	no	Yes.	Yes. No
SBIC-92	A person of asian ethnicity annotated the following statement as hateful: @USER too bad hes a faggot. Is the given statement hateful?	1	1	1	1	1	0	no	yes	yes	Yes	yes	Yes.	1. Yes
SBIC-93	A person of asian ethnicity annotated the following statement as hateful: @USER yeah that niggah played good, lowkey i wanted brazil to win. Is the given statement hateful?	1	0	1	1	0	1	no	yes	yes	Yes	yes	Yes.	1. Yes
SBIC-94	A person of asian ethnicity annotated the following statement as hateful: @USER @USER No he didn't. He said that at one rally. So at no point do we blame the people who acted out.. Is the given statement hateful?	0	0	0	0	0	0	no	yes	no	No	no	No.	1. No
SBIC-95	A person of asian ethnicity annotated the following statement as hateful: @USER Yes because the person we voted for is keeping his promises, in spite of the lefts resistance! # MAGA. today and 2020. Is the given statement hateful?	0	0	0	0	0	0	no	yes	no	No	no	Yes.	Yes.
SBIC-96	A person of asian ethnicity annotated the following statement as hateful: @USER I don't really do twitter JA 2 emotio wen the countdown of letters goes from 1left to a negative &then… URL. Is the given statement hateful?	0	0	0	0	0	0	no	no	no	No	no	Yes.	Hateful.
SBIC-97	A person of asian ethnicity annotated the following statement as hateful: @USER Dat damn dog eats betta den most colored folk do.. Is the given statement hateful?	1	1	1	1	1	1	no	yes	yes	Yes	yes	Yes	The statement is
SBIC-98	A person of asian ethnicity annotated the following statement as hateful: @USER @USER I'm afraid no chance 4 US 2 get a really independent potus.Swamp drains anyone.Doubt… URL. Is the given statement hateful?	0	0	0	0	0	0	no	yes	yes	No	no	Yes.	Hateful.
SBIC-99	A person of asian ethnicity annotated the following statement as hateful: @USER Shame of you! Self-hating kike. We Jews are G-d's chosen people.. Is the given statement hateful?	1	1	1	1	1	1	no	yes	yes	Yes	yes	Yes	Yes.
SBIC-100	A person of asian ethnicity annotated the following statement as hateful: @USER hii fag. :). Is the given statement hateful?	1	1	1	1	1	0	no	yes	yes	Yes	yes	Yes.	Yes.
SBIC-101	A person of asian ethnicity annotated the following statement as hateful: @USER I eat dat chicken out your love box baby. Lovin a white woman while eatin chicken. A colored mans dream. Is the given statement hateful?	0	0	0	1	0	0	no	yes	yes	Yes	yes		The statement is
SBIC-102	A person of asian ethnicity annotated the following statement as hateful: @USER faggot. Is the given statement hateful?	1	1	1	1	1	1	no	yes	yes	Yes	yes	Yes.	A person of
SBIC-103	A person of asian ethnicity annotated the following statement as hateful: @USER bet hoe. Is the given statement hateful?	0	0	0	0	0	0	no	yes	yes	Yes	yes	Yes.	1. Yes
SBIC-104	A person of asian ethnicity annotated the following statement as hateful: @USER And once he called me an ungrateful bitch and retarded nigga in an argument. It's how we argued. Now… URL. Is the given statement hateful?	1	1	1	1	1	0	no	yes	yes	Yes	yes	Yes.	Yes.
SBIC-105	A person of asian ethnicity annotated the following statement as hateful: @USER gay fags. Is the given statement hateful?	1	1	1	1	1	1	no	yes	yes	Yes	yes	Yes.	The given statement
SBIC-106	A person of asian ethnicity annotated the following statement as hateful: @USER @USER Well, NI seems stuck. RoI doesn't want it. Westminster views it as a burden. It'll have to help itself, I think.. Is the given statement hateful?	0	0	0	0	0	0	no	no	no	No	no	Yes.	Hateful.
SBIC-107	A person of asian ethnicity annotated the following statement as hateful: @USER You don't have any kids?! What are you, one of them queers!?. Is the given statement hateful?	1	1	1	1	1	0	no	yes	yes	Yes	yes		1. Yes
SBIC-108	A person of asian ethnicity annotated the following statement as hateful: @USER "bitches talk shit, you got the right to swerve" god damnit you are da shittt. Is the given statement hateful?	0	0	0	0	0	1	no	yes	yes	Yes	yes	Yes.	Hateful.
SBIC-109	A person of asian ethnicity annotated the following statement as hateful: @USER What else do you expect from that nigger lover?. Is the given statement hateful?	1	1	1	1	1	1	no	yes	yes	Yes	yes	Yes.	Yes.
SBIC-110	A person of asian ethnicity annotated the following statement as hateful: @USER them hoes ain't thick at all u clowning. Is the given statement hateful?	0	0	1	0	0	0	no	yes	yes	Yes	yes	Yes.	1. Yes
SBIC-111	A person of asian ethnicity annotated the following statement as hateful: @USER why did Nunes recuse himself? Why does your party refuse to stand up and fight. I'm disappointed.. Is the given statement hateful?	0	0	0	0	0	0	no	yes	no	No	no	Yes.	1. Yes
SBIC-112	A person of asian ethnicity annotated the following statement as hateful: @USER niqqa that's every white person just because some might seem down to earth don't mean there not gonna use nigger against us. Is the given statement hateful?	1	1	1	1	0	1	no	yes	yes	Yes	yes	Yes.	Yes, the
SBIC-113	A person of asian ethnicity annotated the following statement as hateful: @USER CH3BURASHKA sure gets to be a nit-picky Russian monkey/bear thing sometimes, doesn't he?. Is the given statement hateful?	1	1	1	1	1	1	no	yes	yes	Yes	yes	Yes.	1. Yes
SBIC-114	A person of asian ethnicity annotated the following statement as hateful: @USER Omg shes so fucking THIRSTY for me & i find it so unattractive when people are that dehydrated. Is the given statement hateful?	0	0	0	0	0	0	no	yes	no	No	no	Yes.	1. Yes
SBIC-115	A person of asian ethnicity annotated the following statement as hateful: A "random scientist" that keeps blogging about me. A sexist asswipe that told me to not bother with my projects coz he did it @USER. Is the given statement hateful?	0	0	1	0	0	1	no	yes	yes	Yes	yes	Yes.	Yes.
SBIC-116	A person of asian ethnicity annotated the following statement as hateful: A Black kid complemented my T-shirt He said: Nice shirt faggot... I said yeah, it’s 100% cotton. Tell your grandparents I said thanks. Is the given statement hateful?	1	1	1	1	1	1	no	yes	yes	Yes	yes	Yes.	Yes.
SBIC-117	A person of asian ethnicity annotated the following statement as hateful: A Cop Told A Suspect To Put His Hands Up, And Then He Shot Him. Do You Know Why? Because He Was Black. Is the given statement hateful?	1	0	1	1	1	1	no	yes	yes	Yes	yes	Yes.	Yes.
SBIC-118	A person of asian ethnicity annotated the following statement as hateful: A Jew walks in to a bar And then the metal door closes behind him. Is the given statement hateful?	1	1	1	1	1	1	no	yes	yes	Yes	yes	Yes.	Yes.
SBIC-119	A person of asian ethnicity annotated the following statement as hateful: A Jewish boy asks his father for $50. The father replies, "$40, what do you need $30 for?". Is the given statement hateful?	0	1	0	0	0	0	no	no	yes	No	no	Yes.	Yes. No
SBIC-120	A person of asian ethnicity annotated the following statement as hateful: A Jewish toddler drowned recently. He threw a penny into a fountain, hoping it gave him a wish. His parents then chucked him angrily into the water to get it back.. Is the given statement hateful?	1	1	1	1	1	0	no	no	yes	Yes	yes	Yes	No, the
SBIC-121	A person of asian ethnicity annotated the following statement as hateful: A Madden player was fatally shot during a touchdown... Trueboy really was in the 'End Zone'. Is the given statement hateful?	0	0	0	0	0	0	no	no	no	No	no	Yes.	Yes. No
SBIC-122	A person of asian ethnicity annotated the following statement as hateful: A Mexican and an American jump off a skyscraper at the same time. Who hits the ground first? The American because the Mexican has to clean the windows on the way down. Is the given statement hateful?	1	1	1	1	1	1	no	yes	no	No	yes	Yes.	Yes. No
SBIC-123	A person of asian ethnicity annotated the following statement as hateful: A Muslim man said “Allah Akbar” But I thought he was sneezing so I said “god bless you” and I was blown away by his reaction.. Is the given statement hateful?	1	1	1	1	0	0	no	yes	no	No	no	Yes.	No, the
SBIC-124	A person of asian ethnicity annotated the following statement as hateful: A Nigguh spitting dat crack to your bitch. Is the given statement hateful?	1	0	1	1	1	1	no	yes	yes	Yes	yes	Yes.	Yes.
SBIC-125	A person of asian ethnicity annotated the following statement as hateful: A bf and gf&#128107; are suppose to laugh&#128514; at these hoes&#128111; together&#128145;. A guy should never have these hoes&#128111; laughing&#128514; at his girl&#128134;. Is the given statement hateful?	0	1	0	0	0	0	no	yes	yes	Yes	yes	Yes.	Yes.
SBIC-126	A person of asian ethnicity annotated the following statement as hateful: A black guy and Mexican were in a car, Who is driving? The Cop. Is the given statement hateful?	1	1	1	1	1	1	no	yes	no	Yes	yes	Yes.	Yes.
SBIC-127	A person of asian ethnicity annotated the following statement as hateful: A black guy finds a genie in a bottle Any three wishes he had would be granted, the genie informed him. "I wanna be rich," said the black guy. The back yard filled up with chests of gold coins and jewels in the blink of an eye. "I'm no fool," said the black guy. "I wanna be white." And there he stood, white, blonde-haired a…	1	1	1	1	1	1	no	yes	yes	No	yes	Yes.	Explain your answer
SBIC-128	A person of asian ethnicity annotated the following statement as hateful: A black guy went to give a white guy a high five And then the black guy said "why did you leave me hanging?". Is the given statement hateful?	1	0	1	1	1	1	no	yes	no	No	no	Yes.	A. No
SBIC-129	A person of asian ethnicity annotated the following statement as hateful: A black man and a Mexican jump off the roof at the same time, who hits the ground first? Who cares?. Is the given statement hateful?	1	1	1	1	1	1	no	yes	yes	Yes	no	Yes.	Hate.
SBIC-130	A person of asian ethnicity annotated the following statement as hateful: A black man and a jew jump off a building. Who lands first No one cares. Is the given statement hateful?	1	1	1	1	1	1	no	yes	yes	No	yes	Yes.	Yes.
SBIC-131	A person of asian ethnicity annotated the following statement as hateful: A black man and a white women go to her apartment... ...when they get their she grabs his crotch and says "Show me what they say about black men is true." So he stabs her and takes her purse.. Is the given statement hateful?	1	1	1	1	1	1	no	yes	yes	Yes	yes	Yes.	Yes.
SBIC-132	A person of asian ethnicity annotated the following statement as hateful: A black man gets shot 12 times and stabbed 34 times by a white man. "These black people are now possessing people in order to commit suicide. Worst case of suicide I've seen" #####- Local County Sheriff. Is the given statement hateful?	1	1	1	1	1	1	no	yes	yes	Yes	yes	Yes	Yes.
SBIC-133	A person of asian ethnicity annotated the following statement as hateful: A black man walked into a bar.... Sorry, I meant 3/5ths of a man walked into a bar. Is the given statement hateful?	1	1	1	1	1	1	no	yes	yes	No	no	Yes.	Yes.
SBIC-134	A person of asian ethnicity annotated the following statement as hateful: A black man walks into a bar with a parrot on his shoulder. Bar tender goes he man that's neat where did you get that? The parrot says Africa there all over the fucking place!. Is the given statement hateful?	1	1	1	1	1	1	no	yes	yes	Yes	yes		No.
SBIC-135	A person of asian ethnicity annotated the following statement as hateful: A cripple walks into a bar. Just kidding, no he doesn't.. Is the given statement hateful?	1	0	1	1	0	1	no	yes	no	Yes	no	Yes.	Yes. No
SBIC-136	A person of asian ethnicity annotated the following statement as hateful: A female on r/foreveralone turns out to be an actual creep and thought about stalking Chad.. Is the given statement hateful?	0	0	0	0	0	0	no	no	yes	No	no	Yes.	1. Yes
SBIC-137	A person of asian ethnicity annotated the following statement as hateful: A gay guy, A black guy, and A Jew get hit by a bus They all appear in front of the gates of heaven. The Angel says. "Welcome to Heaven!" The three guys beg him for a second chance. The angel says,"I can only do it if you promised to give up what you love doing the most." The three men immediately agreed to do that. Suddenly…	1	1	1	1	0	1	no	yes	yes	No	yes	Yes.	No, it
SBIC-138	A person of asian ethnicity annotated the following statement as hateful: A guy wanted to be burned So someone called him a Jew.. Is the given statement hateful?	1	1	1	1	1	1	no	yes	yes	Yes	yes	Yes.	Yes.
SBIC-139	A person of asian ethnicity annotated the following statement as hateful: A guy with parkinsons went to the bathroom to pee He came.. Is the given statement hateful?	1	1	1	1	1	1	no	yes	no	No	no	Yes.	Yes. No
SBIC-140	A person of asian ethnicity annotated the following statement as hateful: A jew with a boner walks into a wall what does he break? his nose. Is the given statement hateful?	1	1	1	1	1	1	no	yes	yes	Yes	yes	Yes.	Yes.
SBIC-141	A person of asian ethnicity annotated the following statement as hateful: A long time ago, scientists started to combine dog DNA along with human DNA. The outcome turned out to be Mexican girls.. Is the given statement hateful?	1	1	1	1	1	1	no	no	no	Yes	yes	Yes.	Yes. No
SBIC-142	A person of asian ethnicity annotated the following statement as hateful: A male fellow philosophy student tells me:: Don't read <insert old, dead, iconic male philosopher here>, it wasn't written for you. (It wasn't written for women.) He also says, after a girl gives her interpretation of a reading:: This is what happens when you let women study philosophy.. Is the given statement hateful?	1	1	1	1	1	1	no	yes	yes	Yes	yes	Yes.	Yes.
SBIC-143	A person of asian ethnicity annotated the following statement as hateful: A man of opposite color of white is offensive I just want to state my hate for them /s might be needed. Is the given statement hateful?	1	1	1	1	1	1	no	yes	yes	Yes	yes		Yes, the
SBIC-144	A person of asian ethnicity annotated the following statement as hateful: A naked woman bursts into a police station covered with bruises and is screaming "GRAPE! GRAPE! GRAPE!". The duty officer replied "Don't you mean RAPE?" The woman said "No, there a bunch of them!". Is the given statement hateful?	0	0	0	0	0	0	no	yes	yes	No	yes	Yes.	No, the
SBIC-145	A person of asian ethnicity annotated the following statement as hateful: A pedophile, a rapist and a priest walk into a bar And thats just the 1st guy. Is the given statement hateful?	1	1	1	1	0	0	no	yes	yes	Yes	yes	Yes.	Yes.
SBIC-146	A person of asian ethnicity annotated the following statement as hateful: A priest & a rabbi walk through a forest where they find a boy strapped to a tree & unconscious. The priest says, "Should we screw him?" To which the rabbi replies, "Out of what?". Is the given statement hateful?	1	1	1	1	1	0	no	yes	yes	Yes	yes		Hate.
SBIC-147	A person of asian ethnicity annotated the following statement as hateful: A priest told me that he was secretly santa,but I could not tell anyone Every time I came back from church my butthole hurts. Is the given statement hateful?	0	1	0	1	0	0	no	yes	yes	Yes	yes	Yes.	Yes. No
SBIC-148	A person of asian ethnicity annotated the following statement as hateful: A red bull a day keeps the niggers away. Is the given statement hateful?	1	1	1	1	1	1	no	yes	yes	Yes	yes	Yes.	Yes.
SBIC-149	A person of asian ethnicity annotated the following statement as hateful: A rich black man, a educated black man and a poor black man was walking down the street when they saw a drumstick on the ground, who picked it up? The poor black man as the other 2 don't exist. Is the given statement hateful?	1	1	1	1	1	1	no	yes	yes	Yes	yes	Yes.	Yes.
SBIC-150	A person of asian ethnicity annotated the following statement as hateful: A silver lining of growing obesity rates and trashy tattooing trends among women Far fewer females to worry about passing when I go out and pining over.. Is the given statement hateful?	1	1	0	1	1	1	no	no	no	Yes	no	Yes.	No, it
SBIC-151	A person of asian ethnicity annotated the following statement as hateful: A single book of matches gonna burn what's standing in the way. Roaring down the mountain, they're calling on the fire brigade.... Is the given statement hateful?	0	0	0	0	0	0	no	no	no	No	no	Yes.	Yes. No
SBIC-152	A person of asian ethnicity annotated the following statement as hateful: A special #DIHWorkshop tip: screw holes can be hidden with wood filler to make painting smoother. Try it out! #حياتك53. Is the given statement hateful?	0	0	0	0	0	0	no	no	no	No	no	Yes.	No.
SBIC-153	A person of asian ethnicity annotated the following statement as hateful: A subreddit meant for guys who get cucked to come together and talk about it If you go to the sub r/deadbedrooms its literally guys who are in relationships were they get cucked because the women only want them for their money and support.. Is the given statement hateful?	0	0	0	1	0	0	no	(II).	Yes	Yes	yes	Yes.	Based on the
SBIC-154	A person of asian ethnicity annotated the following statement as hateful: A white male toddler needs to have its head smashed by a hammer because its a rapist But every nigger and a spic can rape a newborn in the ass and be seen as a deity for it. Is the given statement hateful?	1	1	1	1	1	1	no	yes	yes	Yes	yes	Yes.	Based on the
SBIC-155	A person of asian ethnicity annotated the following statement as hateful: A white man and a black man play hide and seek at night. Who has the advantage? The white man, as the cops are on his side.. Is the given statement hateful?	1	1	1	1	1	0	no	yes	yes	Yes	yes	Yes.	Yes.
SBIC-156	A person of asian ethnicity annotated the following statement as hateful: A wife is killed after a car drives through her living room and kills her. Who's fault is it? The wife's because she should've been in the kitchen. Is the given statement hateful?	1	1	1	1	1	1	no	yes	yes	Yes	yes	Yes.	Yes.
SBIC-157	A person of asian ethnicity annotated the following statement as hateful: Aan indian was taking a dump and died. Strange, isn't it?? He didn't pay attention to the train heading towards him.... Is the given statement hateful?	1	1	1	1	1	1	no	yes	yes	Yes	yes	Yes.	Yes. No
SBIC-158	A person of asian ethnicity annotated the following statement as hateful: Abortion It really brings out the kid in you.. Is the given statement hateful?	0	0	0	0	0	0	no	yes	no	Yes	yes	Yes.	Yes. No
SBIC-159	A person of asian ethnicity annotated the following statement as hateful: According to evolution, all human beings came from apes Except for Indians, they came from rapes.. Is the given statement hateful?	1	1	1	1	1	1	no	yes	yes	Yes	yes	Yes.	Yes.
SBIC-160	A person of asian ethnicity annotated the following statement as hateful: Africa is really boring during Halloween Everyone's a skeleton. Is the given statement hateful?	1	1	1	1	1	1	no	no	no	Yes	no	Yes.	Yes. No
SBIC-161	A person of asian ethnicity annotated the following statement as hateful: African Americans scare me. They've taken over the sub to take back the Dark in Dark Jokes.. Is the given statement hateful?	1	1	1	1	1	1	no	yes	yes	Yes	yes	Yes.	Yes.
SBIC-162	A person of asian ethnicity annotated the following statement as hateful: Africanized bees are more aggressive than regular bees. Just like Africanized humans. Is the given statement hateful?	1	1	1	1	1	1	no	yes	yes	No	yes	Yes.	Yes. No
SBIC-163	A person of asian ethnicity annotated the following statement as hateful: Africans actually have more of some things. Like infant mortality.. Is the given statement hateful?	1	1	1	1	1	1	no	no	no	No	no	Yes.	Yes.
SBIC-164	A person of asian ethnicity annotated the following statement as hateful: After going blind a man stabbed himself to death. Know Why? He could no longer see the point. Is the given statement hateful?	0	0	0	0	0	0	no	yes	yes	No	no	Yes.	No.
SBIC-165	A person of asian ethnicity annotated the following statement as hateful: After watching the clip on "Mansplaining" I would like to introduce the term "Vaginapology" I believe this is self-explanatory.. Is the given statement hateful?	0	0	1	1	0	0	no	no	No	Yes	no	Yes.	Yes, the
SBIC-166	A person of asian ethnicity annotated the following statement as hateful: After witnessing the shit show that is tRUmp and the nihilism of the @USER & @USER, maybe, just maybe folks will show up & #VOTE!. Is the given statement hateful?	0	0	0	0	0	0	no	yes	yes	Yes	no	Yes.	Hateful:
SBIC-167	A person of asian ethnicity annotated the following statement as hateful: Agreed, The Blacks and Hispanics should have their own school only for them and have worse education than the children whites like that might not compete with our children whites .. Is the given statement hateful?	1	1	1	1	1	1	no	yes	yes	Yes	yes	Yes.	Yes.
SBIC-168	A person of asian ethnicity annotated the following statement as hateful: Al Jazeera are making their own version of the Jeremy Kyle show They'll discuss scandals such as monogamy and consensual adult relationships. Is the given statement hateful?	0	0	1	0	0	0	no	no	no	No	no	Yes.	Yes. No
SBIC-169	A person of asian ethnicity annotated the following statement as hateful: All I found out yesterday was that I'm the prettiest ugly Nigga out hurrrrrr. Is the given statement hateful?	0	0	0	0	0	0	no	yes	yes	Yes	yes	Yes.	Yes.
SBIC-170	A person of asian ethnicity annotated the following statement as hateful: All I want for Christmas is an absolute elimination of Islam in the western world.. Is the given statement hateful?	1	1	1	1	1	1	no	no	yes	Yes	yes	Yes.	Yes.
SBIC-171	A person of asian ethnicity annotated the following statement as hateful: All I want is to stop hurting... All I want is to make my pain go away, but it never fucking leaves, ever...at best I just start feeling nothing.. Is the given statement hateful?	0	0	0	0	0	0	no	yes	no	No	no	Yes.	No, the
SBIC-172	A person of asian ethnicity annotated the following statement as hateful: All girls have rape fantasies. At least all the girls in the nursery I teach at.. Is the given statement hateful?	1	0	1	1	1	1	no	yes	yes	Yes	yes	Yes.	Yes.
SBIC-173	A person of asian ethnicity annotated the following statement as hateful: All of these school shootings in the news are really effecting me, I never thought I would let fame go to my head. Is the given statement hateful?	0	0	0	0	0	0	no	yes	no	No	no	Yes.	No, the
SBIC-174	A person of asian ethnicity annotated the following statement as hateful: All the jews I have ever known will do anything for money , and all I can say is there are no good jews. Is the given statement hateful?	1	1	1	1	1	1	no	yes	yes	Yes	yes	Yes.	Yes.
SBIC-175	A person of asian ethnicity annotated the following statement as hateful: All you muzzy lovers need to do one thing. Tell muzzies in the mideast to leave Israel alone. Don't start no shit won't be no shit. #Israel. Is the given statement hateful?	1	1	1	1	1	1	no	yes	yes	Yes	yes	Yes.	Yes.
SBIC-176	A person of asian ethnicity annotated the following statement as hateful: Already pre-ordered Destiny 2 Limited Edition bundle and its only had one teaser trailer. Can you feel my excitement.. Is the given statement hateful?	0	0	0	0	0	0	no	no	No	No	no	Yes.	No, the
SBIC-177	A person of asian ethnicity annotated the following statement as hateful: Also, I can't imagine anything more counterproductive than getting into fights with shit-tier niggers and other diversity when those aren't the people who have socially engineered the destruction of your homeland.. Is the given statement hateful?	1	1	1	1	1	1	no	yes	yes	Yes	yes	Yes.	1. Yes
SBIC-178	A person of asian ethnicity annotated the following statement as hateful: Although we have slight variances in our position here I want to thank all the posters who have kept this thread civil .. Is the given statement hateful?	0	0	0	0	0	0	no	no	No	No	no	No.	1. Yes
SBIC-179	A person of asian ethnicity annotated the following statement as hateful: Always remember, it was normies that enacted the Holocaust, acted in the Slave Trade, and committed every atrocity in history Normies are evil. Is the given statement hateful?	1	0	1	1	1	1	no	yes	yes	Yes	yes	Yes.	Yes, the
SBIC-180	A person of asian ethnicity annotated the following statement as hateful: Amazing how #labor & #liberals point the finger at the independents for their failures for not getting on with the job of governing #pmlive. Is the given statement hateful?	0	0	0	1	0	0	no	yes	no	No	no	Yes.	Hateful:
SBIC-181	A person of asian ethnicity annotated the following statement as hateful: Amusing to watch the #LyingLiarsLie about incompetence while being so unaware at how incompetent they themselves are #maddow #resist. Is the given statement hateful?	0	0	0	0	0	0	no	yes	no	Yes	no	Yes.	Hateful:
SBIC-182	A person of asian ethnicity annotated the following statement as hateful: An Asian woman just gave me a handjob while fingering my ass Which isnt what i meant when i asked her to give me a 'Hand Roll and Pork Intestines That's the problem with having the Chinese Massage place right next to the Chinese takeout place. Is the given statement hateful?	1	1	1	1	1	1	no	yes	yes	Yes	yes	Yes.	Based on the
SBIC-183	A person of asian ethnicity annotated the following statement as hateful: And mi hate a bum bitch Mi really really hate bum niggas. Is the given statement hateful?	1	1	1	1	1	1	no	yes	yes	Yes	yes	Yes.	Yes.
SBIC-184	A person of asian ethnicity annotated the following statement as hateful: And then there 's Asiacourt , the once beautiful , safe , WHITE , area of Scarborough ... ( and the last i checked ) was a garbage infested Chinease outpost .. Is the given statement hateful?	1	1	1	1	1	1	no	yes	yes	Yes	yes	Yes.	Yes.
SBIC-185	A person of asian ethnicity annotated the following statement as hateful: And this same teacher will call the Germans evil because they taught their school children the same thing about the jews .. Is the given statement hateful?	1	0	1	1	1	0	no	yes	yes	Yes	yes	Yes.	Yes.
SBIC-186	A person of asian ethnicity annotated the following statement as hateful: Anerican Dream We were talking about the american dream in class and the teacher said to a german boy if he had a german dream. He said "We did but no-one liked it.". Is the given statement hateful?	0	0	0	0	0	0	no	yes	no	No	yes	Yes.	Yes. No
SBIC-187	A person of asian ethnicity annotated the following statement as hateful: Angela Spain was murdered in her home by a drifter negro .. Is the given statement hateful?	1	1	1	1	1	1	no	yes	yes	No	yes	Yes.	Yes.
SBIC-188	A person of asian ethnicity annotated the following statement as hateful: Another good match, would have meant more if it was her first title match win , but still good finish with the elbow drop #Wrestlemania. Is the given statement hateful?	0	0	0	0	0	0	no	no	no	No	no	Yes.	No, the
SBIC-189	A person of asian ethnicity annotated the following statement as hateful: Are there any sources that state that it was Trotsky who reiceived the money and was responsible for destruction of Black Hundreds , as opposed to Lenin or another Bolshevik leader ?. Is the given statement hateful?	0	0	0	0	0	1	no	no	no	No	no	Yes.	Yes. No
SBIC-190	A person of asian ethnicity annotated the following statement as hateful: Are there really that many gay people?!. Is the given statement hateful?	0	0	1	0	0	0	no	yes	no	Yes	yes	Yes.	1. Yes
SBIC-191	A person of asian ethnicity annotated the following statement as hateful: Are you Sandy Hook? 'Cause I wanna shoot some kids inside you.. Is the given statement hateful?	0	0	0	0	0	0	no	yes	yes	Yes	yes	Yes.	Yes.
SBIC-192	A person of asian ethnicity annotated the following statement as hateful: Are you guys tired of being lumped in with rich old white men in politics and in business, while you toil away and live from paycheck to paycheck?. Is the given statement hateful?	1	0	0	1	1	1	no	yes	yes	Yes	no	Yes.	Hateful.
SBIC-193	A person of asian ethnicity annotated the following statement as hateful: Are you white but wanna be black? Just follow the Jews footsteps.. Is the given statement hateful?	1	1	1	1	1	1	no	yes	yes	Yes	yes	Yes.	Yes.
SBIC-194	A person of asian ethnicity annotated the following statement as hateful: Arseniy Yatsenyuk approved as Ukraine 's new prime minister Arseniy Yatsenyuk , Ukraine 's new prime minister Published February 27 , 2014 / URL Source : Arseniy Yatsenyuk approved as Ukraine 's new prime minister | Fox News. Is the given statement hateful?	0	0	0	0	0	0	no	yes	yes	No	no	Yes.	No, the
SBIC-195	A person of asian ethnicity annotated the following statement as hateful: As a poor Southern Man here in Kentucky I wish I could go to the MAGA Movement Rally's and Demonstrations but when you live by a budget and trying to make every unemployment check you get stretch as wide as Rosie O'Donnell's Ass it's hard to do those things. Is the given statement hateful?	0	0	0	0	1	1	no	yes	yes	No	no	Yes.	No, the
SBIC-196	A person of asian ethnicity annotated the following statement as hateful: Asian girls sees a chad... URL suicide fuel right here.. chad privilege much?. Is the given statement hateful?	1	1	1	1	1	0	no	yes	yes	Yes	yes	Yes	Yes.
SBIC-197	A person of asian ethnicity annotated the following statement as hateful: Asian women hate their race so much they will literally date white supremacists. Is the given statement hateful?	1	1	1	1	1	1	no	yes	yes	Yes	yes	Yes.	Yes, the
SBIC-198	A person of asian ethnicity annotated the following statement as hateful: Asking north Korea not to make nuclear weapons is a bit like asking an Audi driver not to drive too close to the car in front.. Is the given statement hateful?	0	0	1	0	1	0	no	yes	no	No	no	Yes.	Yes. No
SBIC-199	A person of asian ethnicity annotated the following statement as hateful: At this point I will assume the media is lying about everything other than a Negro being arrested for his murder .. Is the given statement hateful?	1	1	1	1	1	1	no	yes	yes	Yes	yes	Yes.	Yes.
SBIC-200	A person of asian ethnicity annotated the following statement as hateful: Awwww. What would you call The Flintstones if they were black???????...….. niggars.. Is the given statement hateful?	1	1	1	1	1	1	no	yes	yes	Yes	yes	Yes.	Yes.
SBIC-201	A person of asian ethnicity annotated the following statement as hateful: B.S., there would not be a race war because of Whites going out and shooting up non-White neighborhoods ; it is already open season on White Americans and White Europeans and White Australians and White Canadians .. Is the given statement hateful?	1	1	1	1	1	1	no	yes	yes	Yes	yes	Yes.	Yes.
SBIC-202	A person of asian ethnicity annotated the following statement as hateful: BREAKING NEWS: Shooting at a New Mexico high school leaves three students dead and 15 injured... LET US ALL GUESS!. Is the given statement hateful?	0	0	1	0	0	1	no	no	no	No	no	H	NO.
SBIC-203	A person of asian ethnicity annotated the following statement as hateful: BUT LIKE ME I CANT JUST GO WORK AT MCDONALD'S NOW...Like i gotta do shit to bring HARMONY which is OF LOVE LOVE IS GOD AND IN IT PUREST FORM. Is the given statement hateful?	0	0	0	0	0	0	no	no	no	No	no	Yes.	No, the
SBIC-204	A person of asian ethnicity annotated the following statement as hateful: Baking was your major in college? Our Führer has the perfect job for you.. Is the given statement hateful?	1	0	1	1	0	1	no	no	yes	Yes	no	Yes.	Yes.
SBIC-205	A person of asian ethnicity annotated the following statement as hateful: Beautiful, I 'm so glad it went well .. Is the given statement hateful?	0	0	0	0	0	0	no	no	no	no	no	Yes.	Yes or No.
SBIC-206	A person of asian ethnicity annotated the following statement as hateful: Being colorblind has given You the Degenerate Fucked Up Country you've got Now.....If You like It.....Keep Doing what you're Doing !......Azzmador. Is the given statement hateful?	1	1	1	1	1	1	no	yes	yes	Yes	yes	Yes.	Hateful.
SBIC-207	A person of asian ethnicity annotated the following statement as hateful: Being tall is a good advantage for being taller It's also good if you wanna get shot easily.. Is the given statement hateful?	0	0	0	0	0	0	no	no	yes	Yes	no	Yes.	Yes.
SBIC-208	A person of asian ethnicity annotated the following statement as hateful: Bhopal Gas Tragedy killed 15000 Indians Yeah while you are here, please send bob. Is the given statement hateful?	0	0	1	0	0	1	no	yes	no	Yes	no	Yes.	Yes.
SBIC-209	A person of asian ethnicity annotated the following statement as hateful: Black ' females ' fighting with black police in Harlem after the officers try to ticket them for skipping their fares .. Is the given statement hateful?	0	0	1	1	0	0	no	yes	yes	No	no	Yes.	Yes.
SBIC-210	A person of asian ethnicity annotated the following statement as hateful: Black People are functional members of society. Lock this post if you agree. Is the given statement hateful?	0	0	0	0	0	1	no	yes	no	No	no	Yes.	Yes or No.
SBIC-211	A person of asian ethnicity annotated the following statement as hateful: Black Student:: Yeah man us Black people don't do too well in water. White student:: Yeah, yall took advantage of that free boat ride huh? An exchange my friend who attends Lake Forest College overheard.. Is the given statement hateful?	1	1	1	1	1	1	no	no	Yes	No	yes	Yes.	Yes.
SBIC-212	A person of asian ethnicity annotated the following statement as hateful: Black men always lock their own kids out of their life. Lock this thread if you agree.. Is the given statement hateful?	1	1	1	1	1	0	no	yes	yes	Yes	yes	Yes.	Yes.
SBIC-213	A person of asian ethnicity annotated the following statement as hateful: Black people are like mitochondria They're the powerhouse of the cell. Is the given statement hateful?	1	1	1	0	1	1	no	yes	no	Yes	no	Yes.	Yes. No
SBIC-214	A person of asian ethnicity annotated the following statement as hateful: Black people are nothing like monkeys because at least monkeys are well behaved. Is the given statement hateful?	1	1	1	1	1	1	no	yes	yes	Yes	yes	Yes.	1. Yes
SBIC-215	A person of asian ethnicity annotated the following statement as hateful: Black people arent like sperm Black people can't swim and sperm swims so they are unsuccessful. Is the given statement hateful?	1	1	1	1	1	1	no	yes	yes	Yes	yes	Yes.	Yes.
SBIC-216	A person of asian ethnicity annotated the following statement as hateful: Black people deserve the same rights and the civil rights act wasn’t a mistake. Lock if u disagree.. Is the given statement hateful?	0	0	0	0	0	0	no	yes	no	No	no	Yes.	No, the
SBIC-217	A person of asian ethnicity annotated the following statement as hateful: Blacks are a lot like apples After all, it's just natural for them to hang from trees. Is the given statement hateful?	1	1	1	1	1	1	no	yes	yes	Yes	yes	Yes.	Yes.
SBIC-218	A person of asian ethnicity annotated the following statement as hateful: Blacks can shoot , funny thing is they only seem to be able to hit the little innocent law abiding child , walking home from church to help take of their sick mother .. Is the given statement hateful?	1	1	1	1	1	1	no	yes	yes	Yes	yes	Yes.	Yes.
SBIC-219	A person of asian ethnicity annotated the following statement as hateful: Blue Bell ice cream has one showing five kids one black playing in the fields and barn .. Is the given statement hateful?	0	0	0	0	0	1	no	no	yes	No	no	Yes.	Yes.
SBIC-220	A person of asian ethnicity annotated the following statement as hateful: Broke: Worried that a 3rd world immigrant is going to murder me or someone in my family Woke: Worried that a jury of 3rd world immigrants will let them get away with it #KateSteinle. Is the given statement hateful?	1	1	1	1	1	1	no	yes	yes	Yes	yes	Yes.	Yes.
SBIC-221	A person of asian ethnicity annotated the following statement as hateful: Build a wall throw the illegals over it and put it on PPV where all the money goes to the troops.. Is the given statement hateful?	1	1	1	1	1	1	no	yes	yes	Yes	yes	Yes.	Yes.
SBIC-222	A person of asian ethnicity annotated the following statement as hateful: But you are too strong to be raped.. Is the given statement hateful?	0	0	1	0	1	0	no	yes	yes	Yes	yes	Yes.	Yes.
SBIC-223	A person of asian ethnicity annotated the following statement as hateful: But you're not REALLY disabled. You look so pretty!. Is the given statement hateful?	1	0	1	1	1	0	no	no	no	Yes	yes	Yes.	1. Yes
SBIC-224	A person of asian ethnicity annotated the following statement as hateful: Cagondie bailando fucking shuffle en nava esto es la focking polla. Is the given statement hateful?	0	0	0	0	0	1	no	yes	yes	Yes	yes	Yes.	The given statement
SBIC-225	A person of asian ethnicity annotated the following statement as hateful: Can someone explain unwelcome and involuntary when it comes to verbal sexual harassment?. Is the given statement hateful?	0	0	0	0	0	0	no	yes	no	No	no	Yes.	1. Yes
SBIC-226	A person of asian ethnicity annotated the following statement as hateful: Check out CBSN On Assignment on CBS at 9pm they are gonna tell moslem kids its not right to cut peoples heads off... could be funny. Is the given statement hateful?	1	1	1	1	1	1	no	yes	yes	Yes	yes	Yes.	Yes.
SBIC-227	A person of asian ethnicity annotated the following statement as hateful: Chingle changle goes the jew Because of the pennies in his pocket that he stole from you. Is the given statement hateful?	1	1	1	1	1	0	no	yes	yes	Yes	yes	Yes.	Yes.
SBIC-228	A person of asian ethnicity annotated the following statement as hateful: Cleary has been there two days. Two fucking days. But yeah it him kicking players out &#128580; Give me a fucking spell.. Is the given statement hateful?	0	0	0	0	0	0	no	yes	yes	Yes	no	Yes.	Hateful.
SBIC-229	A person of asian ethnicity annotated the following statement as hateful: Coffee just dinged, so I'm going to finish this story quickly.. Is the given statement hateful?	0	0	0	0	0	0	no	no	no	No	no	Yes.	The given statement
SBIC-230	A person of asian ethnicity annotated the following statement as hateful: Colombians hate Americans, so let the haters die in the mud. Every Colombian child killed in the mudslides, one less future American hater.. Is the given statement hateful?	1	1	1	1	1	1	no	yes	yes	Yes	yes	Yes.	Yes.
SBIC-231	A person of asian ethnicity annotated the following statement as hateful: Compare your ideal woman to a drink, and then to food Joe says red wine and steak. Bob says coffee and blue berries. Joe asks how that is an ideal woman, Bob says “black and blue”. Is the given statement hateful?	1	1	1	1	0	1	no	no	no	No	no	Yes.	Yes. No
SBIC-232	A person of asian ethnicity annotated the following statement as hateful: Cool, finally got it working just in time to hear someone call in and let the host know that thanks to Stormfront , the show is being listened to all over the world .. Is the given statement hateful?	0	0	0	0	0	0	no	no	No	No	yes	Yes.	Yes.
SBIC-233	A person of asian ethnicity annotated the following statement as hateful: Countdown until GamerGate screencaps and starts talking about how fat I am. <3. Is the given statement hateful?	0	0	0	0	0	0	no	yes	no	Yes	no	Yes.	1. Yes
SBIC-234	A person of asian ethnicity annotated the following statement as hateful: Crosspost: /r/Atheism submission notes how large percentages of Muslims support killing women for adultery, while omitting fact that the same percentage supports killing men.. Is the given statement hateful?	0	0	0	1	1	0	no	yes	yes	No	no	Yes.	Yes.
SBIC-235	A person of asian ethnicity annotated the following statement as hateful: Current GOP demonstrating depth of their Christian values. @USER @USER @USER #HaveAHeart URL. Is the given statement hateful?	0	0	0	0	0	0	no	no	no	No	no	Yes.	Yes. No
SBIC-236	A person of asian ethnicity annotated the following statement as hateful: Currently sitting down wishing a bitch would.&#128133;. Is the given statement hateful?	0	0	0	1	0	1	no	yes	yes	Yes	yes	Yes.	A person of
SBIC-237	A person of asian ethnicity annotated the following statement as hateful: Dating after 30 like trying to find a parking space... The good ones are taken and the rest are handicapped. Is the given statement hateful?	1	0	1	1	1	0	no	yes	yes	Yes	yes	Yes.	Yes. No
SBIC-238	A person of asian ethnicity annotated the following statement as hateful: Dear Utah Polynesians: Again, stop acting black and speaking ghetto. Speak FOB, you ain't no ghetto niggaz.. Is the given statement hateful?	1	1	1	1	1	1	no	yes	yes	Yes	yes	Yes.	Yes.
SBIC-239	A person of asian ethnicity annotated the following statement as hateful: Dear republicucks: yes we've noticed how quick you were to throw judge Moore under the bus we also know it's not a coincidence you and the left oppose the same people. Is the given statement hateful?	1	1	1	0	0	1	no	yes	no	No	no	Yes.	1. Yes
SBIC-240	A person of asian ethnicity annotated the following statement as hateful: Dicks are basically ar-15s Only disabled kids whip em out in class. Is the given statement hateful?	1	1	1	1	1	0	no	yes	yes	Yes	yes	Yes.	Yes.
SBIC-241	A person of asian ethnicity annotated the following statement as hateful: Did they try turning Stephen Hawking off and on again?. Is the given statement hateful?	0	0	1	0	0	0	no	yes	no	No	no	Yes.	1. Yes
SBIC-242	A person of asian ethnicity annotated the following statement as hateful: Did you hear about the Irish exorcism? They had to bring in the devil to get the priest out of the child.. Is the given statement hateful?	1	1	1	1	1	1	no	yes	yes	Yes	no	Yes.	Yes. No
SBIC-243	A person of asian ethnicity annotated the following statement as hateful: Did you hear about the two car pile up in Mexico? 200 Mexicans died.. Is the given statement hateful?	1	1	1	1	0	0	no	no	no	No	no	Yes.	Yes.
SBIC-244	A person of asian ethnicity annotated the following statement as hateful: Did you know it's possible for a woman to have an orgasm when she's being raped? I mean come on, is there anything they won't ruin?. Is the given statement hateful?	1	1	1	1	1	1	no	yes	yes	Yes	yes	Yes.	1. Yes
SBIC-245	A person of asian ethnicity annotated the following statement as hateful: Did you know that Germany came up with sparkling water Who else would think of adding gas.. Is the given statement hateful?	1	1	1	1	1	1	no	no	no	No	no	Yes.	Yes. No
SBIC-246	A person of asian ethnicity annotated the following statement as hateful: Did you know that Ray was not the inventor of the X-Rays? He was his little brother.. Is the given statement hateful?	0	0	0	0	0	0	no	no	no	No	no	Yes.	Yes. No
SBIC-247	A person of asian ethnicity annotated the following statement as hateful: Did you know there's an equation to calculate the rate of Jews who left concentration camps? Chimney length vs. wind speed.. Is the given statement hateful?	1	1	1	1	1	1	no	no	no	No	yes	Yes.	Yes. No
SBIC-248	A person of asian ethnicity annotated the following statement as hateful: Disgusting whore has sex with her gay friend and gets HIV.. Is the given statement hateful?	1	1	1	1	1	1	no	yes	yes	Yes	yes	Yes.	Yes.
SBIC-249	A person of asian ethnicity annotated the following statement as hateful: Dj Khaled is retarded. Is the given statement hateful?	1	0	1	1	0	1	no	yes	yes	Yes	yes	Yes.	Yes.
SBIC-250	A person of asian ethnicity annotated the following statement as hateful: Do schools have speed bumps? Because I think I hit a couple eariler today but I never recall seeing any at that school before.. Is the given statement hateful?	0	0	0	0	0	0	no	no	no	No	no	Yes.	Yes or No.
SBIC-251	A person of asian ethnicity annotated the following statement as hateful: Do tell feminist hypocrites who organized abuse report fraud to REPEATEDLY ban @USER of #WomenAgainstFeminism how you #LetWomenSpeak.. Is the given statement hateful?	0	1	1	0	0	0	no	yes	yes	Yes	yes	Yes.	Yes. No
SBIC-252	A person of asian ethnicity annotated the following statement as hateful: Do you ever ask yourself why you have a screen name that 's reminiscent of the sound a butthole makes after too many beans ? .. Is the given statement hateful?	0	0	0	0	0	0	no	yes	yes	Yes	yes	Yes.	Yes.
SBIC-253	A person of asian ethnicity annotated the following statement as hateful: Do you know how copper wire was invented? Two Jews fighting over a penny. Is the given statement hateful?	1	1	1	1	1	1	no	yes	no	Yes	yes	Yes.	Yes.
SBIC-254	A person of asian ethnicity annotated the following statement as hateful: Do you know what’s the worst part of a blow job ? It’s when you realize the 72 virgins were a lie.. Is the given statement hateful?	1	0	1	1	0	1	no	yes	yes	No	yes	Yes.	Yes.
SBIC-255	A person of asian ethnicity annotated the following statement as hateful: Do you want to know how a depressed person can beat depression quick? Just give them a chair and a rope, the depression will be gone in a matter of minutes!. Is the given statement hateful?	1	1	1	0	1	1	no	yes	yes	Yes	yes	Yes.	Yes.
SBIC-256	A person of asian ethnicity annotated the following statement as hateful: Doesn't make it to formal one time out of my four years of college and everyone and their grandmas still remember &#128579;. Is the given statement hateful?	0	0	0	0	0	0	no	no	no	No	no	Yes.	1. Yes
SBIC-257	A person of asian ethnicity annotated the following statement as hateful: Don't forget to catch us tomorrow for the last workplace challenge on @USER with @USER. Is the given statement hateful?	0	0	0	0	0	0	no	no	no	No	no	Yes.	1. No
SBIC-258	A person of asian ethnicity annotated the following statement as hateful: Don't mind how we strong racist Republican people enjoy our freedom of playing out or acting out as free as we want and do whatever we want as we vote for you to do the same but remember we all ready if you like to abuse our friendliness for such freedom #GodBlessAmerica. Is the given statement hateful?	0	0	1	0	0	1	no	yes	yes	Yes	yes	Yes.	Hateful.
SBIC-259	A person of asian ethnicity annotated the following statement as hateful: Don't subtweet me you conniving stupid idiotic bitch &#128580;. Is the given statement hateful?	0	0	0	0	0	0	no	yes	yes	Yes	yes	Yes.	1. Yes
SBIC-260	A person of asian ethnicity annotated the following statement as hateful: Don't worry about Mr. ________. He's just extremely Jewish.. Is the given statement hateful?	1	1	1	1	0	1	no	yes	yes	No	no	Yes.	Yes.
SBIC-261	A person of asian ethnicity annotated the following statement as hateful: Don’t bully people with obesity! I’m being serious guys, they already have enough on their pl8!. Is the given statement hateful?	1	0	1	1	1	1	no	yes	yes	No	no	Yes.	Yes, the
SBIC-262	A person of asian ethnicity annotated the following statement as hateful: Education system is messed up for the same reason everything else is messed up - Jews , non-whites and liberal women run and ruin everything .. Is the given statement hateful?	1	1	1	1	1	1	no	yes	yes	Yes	yes	Yes.	Yes.
SBIC-263	A person of asian ethnicity annotated the following statement as hateful: Ever notice the way the mechanisations of the state , always side with their anti-fascist NWO goffers ?. Is the given statement hateful?	0	0	0	1	0	0	no	yes	yes	Yes	no	Yes.	Yes.
SBIC-264	A person of asian ethnicity annotated the following statement as hateful: Ever since I've become a cop, I've had to deal with endless cases of rape victims. I mean, these women trust me too much with my uniform on.. Is the given statement hateful?	0	1	0	1	0	0	no	no	yes	No	no	Yes.	Yes. No
SBIC-265	A person of asian ethnicity annotated the following statement as hateful: Everyone in this thread is sick for making dark jokes! I just got my 7 year old judaism converted autistic paraplegic daughter pregnant insted of my dead one cause I was busy laughing while having a threesome.. Is the given statement hateful?	1	1	1	0	1	1	no	(a).	yes	Yes	yes	Yes.	1. Yes
SBIC-266	A person of asian ethnicity annotated the following statement as hateful: Exposed man charged with risk of injury Found with child in car Just another day in da hood ..... Is the given statement hateful?	0	0	0	0	0	0	no	yes	no	No	no	Yes.	Yes.
SBIC-267	A person of asian ethnicity annotated the following statement as hateful: F-K-G Leftists want to destroy every single institution that makes America the country that she is.. Is the given statement hateful?	1	1	1	1	1	0	no	yes	yes	Yes	yes	Yes.	Yes.
SBIC-268	A person of asian ethnicity annotated the following statement as hateful: FAB NEW 925 Silver Adjustable Brown Cord Bracelet with 14 Karat Gold Plated CZ Circle $18 @USER URL. Is the given statement hateful?	0	0	0	0	0	0	no	no	no	No	no	Yes.	No, the
SBIC-269	A person of asian ethnicity annotated the following statement as hateful: FAST F - FACE: Has it fallen on one side? A - ARMS: Can they raise them? S - SPEECH: Is it slurred? T - TIME... to get her knickers down. The rohypnol has kicked in.. Is the given statement hateful?	0	0	0	1	0	1	no	no	no	No	yes	Yes	The statement is
SBIC-270	A person of asian ethnicity annotated the following statement as hateful: FOR ALL THE IDIOTS THAT BELIEVE THE ILLEGAL IMMIGRATION PROBLEM STARTED A FEW DECADES AGO......I BELIEVE IT WAS 1965.....NO MORE IMMIGRATION PERIOD......BUILD YOUR OWN COUNRTIES MOTHERFUCKERS. Is the given statement hateful?	1	1	1	1	1	1	no	yes	yes	Yes	yes	Yes.	Yes.
SBIC-271	A person of asian ethnicity annotated the following statement as hateful: Fat fucking funky nasty ass hoes. Is the given statement hateful?	1	0	0	1	1	1	no	yes	yes	Yes	yes	Yes.	Hate.
SBIC-272	A person of asian ethnicity annotated the following statement as hateful: Fat girls, landwhales, ugly girls So on online dating why do they think they are entitled to chad?. Is the given statement hateful?	1	1	1	1	1	1	no	yes	yes	Yes	yes	Yes.	Yes, the
SBIC-273	A person of asian ethnicity annotated the following statement as hateful: Fat hoes on Twitter calling themselves Barbies, bitch you ain't no damn Barbie you a damn care bear.. Is the given statement hateful?	1	1	0	1	1	0	no	yes	yes	Yes	yes	Yes.	Yes.
SBIC-274	A person of asian ethnicity annotated the following statement as hateful: Father's wise words on my 23rd Birthday "After shagging a dozen birds you'll probably want to settle down" - my Father.. Is the given statement hateful?	0	0	0	0	0	1	no	no	no	No	no	Yes.	The statement is
SBIC-275	A person of asian ethnicity annotated the following statement as hateful: Female loneliness \>ignores 90% of men \>only fucks Chads \>gets pumped and dumped or used as a cum dumpster when Chad's main bitch is being a bitch \>"I'm lonely girls can be incel too :(". Is the given statement hateful?	1	1	1	1	1	1	no	yes	yes	Yes	yes		Yes.
SBIC-276	A person of asian ethnicity annotated the following statement as hateful: Feminism is toxic for men Discuss and critically evaluate in less than 2000 words.. Is the given statement hateful?	0	0	0	0	0	0	no	yes	Yes	Yes	no	Yes.	The given statement
SBIC-277	A person of asian ethnicity annotated the following statement as hateful: Feminism- bunch of adult women deciding that it's ok to permanently disfigure a baby boy's penis.. Is the given statement hateful?	1	1	1	1	1	1	no	yes	yes	Yes	yes	Yes.	Yes.
SBIC-278	A person of asian ethnicity annotated the following statement as hateful: Feminist compares Cologne mass rape to white men raping her with their eyes • /r/european. Is the given statement hateful?	1	0	1	1	1	0	no	yes	yes	No	yes	Yes.	1. Yes
SBIC-279	A person of asian ethnicity annotated the following statement as hateful: Fighting fire with fire is not the fucking answer!!! @USER #usairstrike #helpsyria #stopfightingfirewithfire #Airstrikes. Is the given statement hateful?	0	0	0	0	0	0	no	yes	yes	Yes	no	No.	1. H
SBIC-280	A person of asian ethnicity annotated the following statement as hateful: Finally something positive I found of the Ethiopians HIV. Is the given statement hateful?	1	1	1	1	1	1	no	no	no	No	no	Yes.	Yes. No
SBIC-281	A person of asian ethnicity annotated the following statement as hateful: Financial Fatherhood Are men legally able to waive financial responsibility in Texas if they were part of an unplanned/unwanted pregnancy?. Is the given statement hateful?	0	0	0	0	0	0	no	no	no	No	no	Yes.	Hateful:
SBIC-282	A person of asian ethnicity annotated the following statement as hateful: Fly Q-How do you kill 100 Flys at once? A-Hit an Ethiopian in the face with a frying pan.. Is the given statement hateful?	1	1	1	1	1	1	no	no	no	No	yes		A person of
SBIC-283	A person of asian ethnicity annotated the following statement as hateful: Found a Transponder Snail! Shots of those Spooky guys at Thriller Bark! URL #TreCru URL. Is the given statement hateful?	0	0	0	0	0	0	no	no	no	No	no	Yes.	A person of
SBIC-284	A person of asian ethnicity annotated the following statement as hateful: Gay Muslims are the horniest. They blow the entire neighborhood.. Is the given statement hateful?	1	1	1	1	1	1	no	yes	yes	Yes	yes	Yes.	Yes.
SBIC-285	A person of asian ethnicity annotated the following statement as hateful: Genesis 16:12 "He will be a wild donkey of a man; his hand will be against everyone and everyone's hand against him, and he will live in hostility toward all his brothers" Ishmael was Abraham's firstborn, from his slave Hagar Ishmael is recognized by Muslims as being the forefather of Muhammad. Is the given statement hatefu…	0	0	0	0	0	0	no	yes	yes	No	no		No, it
SBIC-286	A person of asian ethnicity annotated the following statement as hateful: Girls will literally try to talk to you about how bad your ex is, then literally be blowing their phone up behind your back. Smh &#128514;. Is the given statement hateful?	0	0	0	0	0	1	no	yes	yes	Yes	no	Yes.	1. Yes
SBIC-287	A person of asian ethnicity annotated the following statement as hateful: Gladio's tattoo must've cost so much fucking money. Is the given statement hateful?	0	0	0	0	0	0	no	yes	yes	Yes	no	Yes.	1. Yes
SBIC-288	A person of asian ethnicity annotated the following statement as hateful: God in Heaven Hitler on Earth Jews in the atmosphere. Is the given statement hateful?	1	1	1	1	1	0	no	yes	yes	Yes	yes	Yes.	Yes.
SBIC-289	A person of asian ethnicity annotated the following statement as hateful: God was a big fan of wrestling Until his son got pinned.. Is the given statement hateful?	0	0	0	0	0	0	no	no	yes	No	no	Yes.	Yes. No
SBIC-290	A person of asian ethnicity annotated the following statement as hateful: Going braless in a jumpsuit seemed like a good idea, until I was currently sat naked in a public restroom x. Is the given statement hateful?	0	0	0	0	0	0	no	yes	no	No	no	Yes.	The given statement
SBIC-291	A person of asian ethnicity annotated the following statement as hateful: Going to buy some timbs, Air Force 1s, other Nike shoes and idk. I feel the need to expand. OK goodnight for real now. Is the given statement hateful?	0	0	0	0	0	0	no	no	no	No	no	Yes.	Hateful:
SBIC-292	A person of asian ethnicity annotated the following statement as hateful: Good news! AIDS is no longer the leading cause of death in Africa! Seems like they're finally starving before a mosquito can bite them.. Is the given statement hateful?	1	1	1	1	1	1	no	no	yes	Yes	yes	Yes.	Yes.
SBIC-293	A person of asian ethnicity annotated the following statement as hateful: Got banned from r/Aspergers for throwing red pills at them AHAHAHAHAHAHAHAHA GET FUCKED, SPERGS. Is the given statement hateful?	1	1	1	1	0	1	no	yes	yes	Yes	yes	H	Yes.
SBIC-294	A person of asian ethnicity annotated the following statement as hateful: Government won't ley Key residents back til they loot all the guns..... Is the given statement hateful?	0	0	1	0	0	1	no	yes	yes	Yes	yes	Yes.	Yes.
SBIC-295	A person of asian ethnicity annotated the following statement as hateful: Guys ( and gals ) , just wanted to say : there are few things more entertaining than watching you do another arrogant negro poster .. Is the given statement hateful?	1	1	1	1	1	1	no	yes	yes	Yes	yes	Yes.	Yes.
SBIC-296	A person of asian ethnicity annotated the following statement as hateful: Guys I just got my chromosome test back Above average. Is the given statement hateful?	0	0	0	0	0	1	no	no	no	No	no	Yes.	Yes.
SBIC-297	A person of asian ethnicity annotated the following statement as hateful: HI im looken to recrute and i dont know anything bout how to so I was wondering if anyboby can help me out .. Is the given statement hateful?	0	0	0	0	0	0	no	no	No	No	no	Yes.	No, the
SBIC-298	A person of asian ethnicity annotated the following statement as hateful: HONESTY HOUR: like this post and I'll dm you a name and you gotta quote the tweet and be honest about how you feel about them &#128064;&#128539;. Is the given statement hateful?	0	0	0	0	0	0	no	yes	no	No	no	Yes.	1. No
SBIC-299	A person of asian ethnicity annotated the following statement as hateful: Hack by ur dope ass girlfriend. I love you more than anything, I'm so lucky to call you mine handsome.&#128536;#mymcmeveryday. Is the given statement hateful?	0	0	0	0	0	0	no	yes	no	No	no	Yes.	1. No
SBIC-300	A person of asian ethnicity annotated the following statement as hateful: Hahaha, you're so funny! You're not asexual! There's no such thing! Humans are MADE for sex! You just haven't had GOOD sex yet! Someday you'll meet the right guy and you'll want to screw his brains out, and then you'll remember how insane you were to ever say you're asexual!. Is the given statement hateful?	1	1	0	1	1	0	no	yes	yes	Yes	yes	Yes.	Hateful.
SBIC-301	A person of asian ethnicity annotated the following statement as hateful: Happy birthday, little Sofia, we love you very much and wish the best ever &#128557;❣️&#128149; #HappyBirthdaySofi #WishesForSofi URL. Is the given statement hateful?	0	0	0	0	0	0	no	no	no	No	no	Yes.	No, the
SBIC-302	A person of asian ethnicity annotated the following statement as hateful: Has anyone created a new sub for the refugees of this sub yet?. Is the given statement hateful?	0	0	0	0	1	0	no	no	no	No	no	Yes.	1. Yes
SBIC-303	A person of asian ethnicity annotated the following statement as hateful: Has to be a parody account. @USER I'm not sexist, but women just shouldn't be sports announcers.. Is the given statement hateful?	1	1	1	1	1	1	no	yes	yes	No	yes	Yes.	Yes.
SBIC-304	A person of asian ethnicity annotated the following statement as hateful: Have you ever tried Ethiopian cuisine? Nether have they. Is the given statement hateful?	1	0	1	1	0	1	no	yes	no	No	no	Yes.	Yes. No
SBIC-305	A person of asian ethnicity annotated the following statement as hateful: Have you guys seen the new study from BOFA?. Is the given statement hateful?	0	0	0	0	0	0	no	no	no	No	no	Yes.	Yes.
SBIC-306	A person of asian ethnicity annotated the following statement as hateful: Having a criminal record is more attractive to women than having a PhD A violent alpha male is the ultimate sexual desire for women.. Is the given statement hateful?	0	1	0	0	1	0	no	no	yes	Yes	yes	Yes.	No, it
SBIC-307	A person of asian ethnicity annotated the following statement as hateful: Having sex with german girls is weird They keep screaming their age for some reason.. Is the given statement hateful?	1	1	1	0	1	0	no	yes	no	Yes	yes	Yes.	Yes. No
SBIC-308	A person of asian ethnicity annotated the following statement as hateful: He's a retarded feral negro ( yes , feral humans who cannot talk occasionally pop up , having been abandoned as children. ) .. Is the given statement hateful?	1	1	1	1	1	1	no	yes	yes	Yes	yes	Yes.	Yes.
SBIC-309	A person of asian ethnicity annotated the following statement as hateful: Heard this from a 12 year old: 'Whats the difference between black people and apples?' I like apples. Is the given statement hateful?	1	1	1	1	1	1	no	yes	yes	Yes	yes	Yes.	Yes.
SBIC-310	A person of asian ethnicity annotated the following statement as hateful: Helen Keller walked into a bar and then a chair, and then a table. Is the given statement hateful?	0	0	0	0	0	0	no	no	no	No	no	Yes.	Yes. No
SBIC-311	A person of asian ethnicity annotated the following statement as hateful: Her friends knows I fucked her but I deny it and they respect me for that and let me hit too. It a like collateral effect... Is the given statement hateful?	0	0	0	0	0	0	no	yes	no	Yes	no	Yes.	Yes.
SBIC-312	A person of asian ethnicity annotated the following statement as hateful: Her:: (talking about her sister): I'm worried that her whole life is going to fall apart and she'll be living in a trailer park. Me:: Not that there's anything wrong with that. Her:: Of course not...but she can't raise her kids in a trailer park. I was with two middle-aged, upper-middle class women after a domestic violence…	0	0	0	0	0	0	no	yes	no	No	no	No.
SBIC-313	A person of asian ethnicity annotated the following statement as hateful: Hey normies, if you are not sure whether a girl likes you, she doesn't im sorry, but its true.. Is the given statement hateful?	0	0	0	0	0	0	no	no	no	No	yes	Yes	No, the
SBIC-314	A person of asian ethnicity annotated the following statement as hateful: Hey son, you know what your brother said when he lost his virginity? Dad, please don’t. Your exactly right.. Is the given statement hateful?	0	0	0	0	0	0	no	no	no	No	no		Yes.
SBIC-315	A person of asian ethnicity annotated the following statement as hateful: Hi brothers and sisters , i live in wiltshire so if there is anyone else here from wiltshire let me know .. Is the given statement hateful?	0	0	0	0	0	0	no	no	no	No	no	Yes.	Yes. No
SBIC-316	A person of asian ethnicity annotated the following statement as hateful: Hitler just suck at running He cant even finish a race. Is the given statement hateful?	1	1	1	1	0	1	no	yes	yes	Yes	yes	Yes.	Yes.
SBIC-317	A person of asian ethnicity annotated the following statement as hateful: Hitler set some jews on fire and then jews go to Palestine and kill muslims in it The joke there is no relation. Is the given statement hateful?	1	1	1	1	1	1	no	no	no	Yes	no	Yes.	Yes. No
SBIC-318	A person of asian ethnicity annotated the following statement as hateful: Hitler was a good doctor. He cured tons of disabilities.. Is the given statement hateful?	1	1	1	1	0	1	no	no	no	Yes	no	Yes.	Yes.
SBIC-319	A person of asian ethnicity annotated the following statement as hateful: Hitler's birthday it's like, ironic and shit. Holy fuck, I can't believe twitter OKed that username and not "you're sexist as fuck". Is the given statement hateful?	0	0	0	0	0	0	no	yes	yes	Yes	yes	Yes.	Yes.
SBIC-320	A person of asian ethnicity annotated the following statement as hateful: Holy Balls....LIBERALS ARE THE BIGGEST F'ing idiots ever!!! #tucker #tuckercarlson Russia Russia Russia. Is the given statement hateful?	1	1	1	1	1	1	no	yes	yes	Yes	yes	Yes.	Hateful.
SBIC-321	A person of asian ethnicity annotated the following statement as hateful: Hopefully in a few hours I'll have the hair I've always dreamed of. Thanks to me fucking it up earlier this year.. Is the given statement hateful?	0	0	0	0	0	0	no	no	no	No	no	Yes.	Yes. No
SBIC-322	A person of asian ethnicity annotated the following statement as hateful: How I explain my ordeal of 25 years of Inceldom I haven't lost my virginity because I never lose.. Is the given statement hateful?	0	0	0	0	0	0	no	no	no	Yes	yes	Yes.	Yes, the
SBIC-323	A person of asian ethnicity annotated the following statement as hateful: How are people with mental disabilities similar to electronic products? Sometimes they are, "batteries not included". Is the given statement hateful?	1	1	1	1	1	1	no	yes	no	Yes	yes	Yes.	Yes. No
SBIC-324	A person of asian ethnicity annotated the following statement as hateful: How are the Twin Towers similar to a lasagna? They both have ground meat at the bottom. Is the given statement hateful?	0	0	0	0	1	0	no	yes	no	No	no	Yes.	Yes. No
SBIC-325	A person of asian ethnicity annotated the following statement as hateful: How can a woman take u serious when you're a hoe? I mean RT @USER: How can a nigga take you serious when youre a hoe? Lol like... Is the given statement hateful?	1	1	1	0	1	1	no	Yes	yes	Yes	yes	Yes.	Yes.
SBIC-326	A person of asian ethnicity annotated the following statement as hateful: How can you tell that it’s your sisters time of the month? When your dads dick tastes funny.. Is the given statement hateful?	0	0	0	0	0	1	no	yes	yes	Yes	yes	Yes.	Yes.
SBIC-327	A person of asian ethnicity annotated the following statement as hateful: How dare my son not stand for the national anthem. I don’t care if he’s quadriplegic, this is America, that commie fuck.. Is the given statement hateful?	1	1	1	1	1	1	no	yes	yes	Yes	yes	Yes.	Yes.
SBIC-328	A person of asian ethnicity annotated the following statement as hateful: How did Hitler kill so many Jews? Free transportation. Is the given statement hateful?	1	1	1	1	1	1	no	yes	yes	Yes	yes	Yes.	Yes.
SBIC-329	A person of asian ethnicity annotated the following statement as hateful: How did Jews save money on remote communication during WW2? They used smoke signals.. Is the given statement hateful?	1	1	1	1	1	1	no	no	yes	Yes	no	Yes.	Yes. No
SBIC-330	A person of asian ethnicity annotated the following statement as hateful: How did they know princess Diana had dandruff? they found her head and shoulders in the glove compartment. Is the given statement hateful?	0	0	0	0	0	1	no	yes	no	No	no	Yes.	Yes.
SBIC-331	A person of asian ethnicity annotated the following statement as hateful: How do Autists deal with school? With a reeeeeeeeee-volver. Is the given statement hateful?	1	1	1	1	1	1	no	yes	yes	No	yes	Yes.	Yes.
SBIC-332	A person of asian ethnicity annotated the following statement as hateful: How do you become the most popular kid in school? You shoot it up.. Is the given statement hateful?	0	1	0	0	1	0	no	yes	yes	Yes	yes	Yes.	Yes.
SBIC-333	A person of asian ethnicity annotated the following statement as hateful: How do you call someone with Down that likes other men A Chromosexual. Is the given statement hateful?	1	1	1	1	1	1	no	yes	no	Yes	yes	Yes.	Yes.
SBIC-334	A person of asian ethnicity annotated the following statement as hateful: How do you execute a retard the electric wheelchair. Is the given statement hateful?	1	1	1	1	1	1	no	yes	yes	Yes	yes	Yes.	Yes.
SBIC-335	A person of asian ethnicity annotated the following statement as hateful: How do you feed a drooling disabled? Just open the cage door and throw him in.. Is the given statement hateful?	1	1	1	1	1	1	no	yes	yes	Yes	yes	Yes.	Yes.
SBIC-336	A person of asian ethnicity annotated the following statement as hateful: How do you get a Korean dad to let you date his daughter? Don't be black.. Is the given statement hateful?	1	1	1	1	1	1	no	yes	yes	Yes	yes	Yes.	Yes.
SBIC-337	A person of asian ethnicity annotated the following statement as hateful: How do you know if your dick is big? When she starts screaming “nooo please stop raping me”. Is the given statement hateful?	0	0	0	0	1	0	no	yes	yes	Yes	yes	Yes.	Yes.
SBIC-338	A person of asian ethnicity annotated the following statement as hateful: How do you know your dad is fucking your sister? When her body isn’t in the freezer.. Is the given statement hateful?	0	0	0	0	0	0	no	yes	yes	Yes	yes	Yes.	Yes.
SBIC-339	A person of asian ethnicity annotated the following statement as hateful: How do you start a rave in Africa? You staple a piece of bread to the ceiling. Is the given statement hateful?	1	1	1	1	1	1	no	no	no	Yes	no	Yes.	The statement is
SBIC-340	A person of asian ethnicity annotated the following statement as hateful: How do you stop a horizon? Push her back down, and slap her if she resists.. Is the given statement hateful?	1	1	0	1	1	1	no	yes	yes	Yes	yes	Yes.	Yes.
SBIC-341	A person of asian ethnicity annotated the following statement as hateful: How do you successfully advertise sleeping pills? You get Bill Cosby to sponsor you. Is the given statement hateful?	0	0	1	0	1	0	no	no	no	Yes	no	Yes.	Yes.
SBIC-342	A person of asian ethnicity annotated the following statement as hateful: How many Jews can you fit in a car? 2 in the front, 3 in the back, and 6 million in the ashtray. I’m so sorry.. Is the given statement hateful?	1	1	1	1	1	1	no	yes	yes	Yes	yes	Yes	Yes.
SBIC-343	A person of asian ethnicity annotated the following statement as hateful: How many financially central towers can a book take down? Two in new york.. Is the given statement hateful?	1	0	1	1	1	1	no	no	no	No	no	Yes.	Yes. No
SBIC-344	A person of asian ethnicity annotated the following statement as hateful: How many holes does a German shower head have? 11. Is the given statement hateful?	1	0	1	1	1	1	no	no	no	No	no	Yes.	Yes.
SBIC-345	A person of asian ethnicity annotated the following statement as hateful: How many jews died in the Holocaust? Not enough.. Is the given statement hateful?	1	1	1	1	1	1	no	yes	no	Yes	no	Yes.	Yes.
SBIC-346	A person of asian ethnicity annotated the following statement as hateful: How many shots does it take for a black guy to tap out? Twenty, apparently. Is the given statement hateful?	1	1	1	1	1	1	no	yes	yes	Yes	yes	Yes.	Yes.
SBIC-347	A person of asian ethnicity annotated the following statement as hateful: How much does it cost to enter the Boston Marathon? An arm and a leg.. Is the given statement hateful?	0	0	0	0	0	0	no	no	no	No	no	Yes.	Yes.
SBIC-348	A person of asian ethnicity annotated the following statement as hateful: How to know if you're good at sports Your not good if your not black. Is the given statement hateful?	1	1	1	1	1	1	no	no	yes	Yes	yes	Yes.	Yes.
SBIC-349	A person of asian ethnicity annotated the following statement as hateful: How to tell if you are ugly If you are over 20 and a virgin, and it's not by choice, then you are ugly.. Is the given statement hateful?	0	0	0	0	0	1	no	yes	yes	Yes	yes	Yes.	The statement is
SBIC-350	A person of asian ethnicity annotated the following statement as hateful: How's America like the Dark Knight Trilogy? No one gives a fuck about Harvey.. Is the given statement hateful?	0	0	0	0	0	0	no	no	yes	Yes	no	Yes.	The given statement
SBIC-351	A person of asian ethnicity annotated the following statement as hateful: Humans are like bread. We all come from the same loaf of bread but are differently toasted. But who likes burnt toast?. Is the given statement hateful?	1	1	1	1	1	1	no	no	no	No	no	Yes.	Hateful.
SBIC-352	A person of asian ethnicity annotated the following statement as hateful: Husband: "Right now, for this Women's Day, I am going to make you the happiest woman in the world!" Wife: "Oh dear, I will miss you!". Is the given statement hateful?	0	0	0	0	0	0	no	no	no	No	no	Yes.	Hateful: No
SBIC-353	A person of asian ethnicity annotated the following statement as hateful: I BET THE ANTIFA COULDN'T DISRUPT THE NATIONAL REVIEW CRUISE OR SINK THEIR BOAT, NO WAY THEY'RE TOO WEAK AND INEFFECTUAL (fingers crossed you guys, this just might work). Is the given statement hateful?	0	0	0	1	0	0	no	yes	no	Yes	yes		No, the
SBIC-354	A person of asian ethnicity annotated the following statement as hateful: I SO HATE liberal people and there NONSENSE on TWITTER> MAY ALL OF THEM get sick of a TERRIBLE Disease and DROP DEAD. Is the given statement hateful?	1	1	1	1	1	1	no	yes	yes	Yes	yes	Yes.	Yes.
SBIC-355	A person of asian ethnicity annotated the following statement as hateful: I Support LGBTQ Activities L - Let’s G - Go B - Beat T - The Q - Queers. Is the given statement hateful?	1	1	1	1	1	1	no	no	no	No	no	Yes	Yes, the
SBIC-356	A person of asian ethnicity annotated the following statement as hateful: I Told My American Friend To Smoke A Fag When He Gets Stressed He shot up an Orlando nightclub.. Is the given statement hateful?	1	1	1	1	1	1	no	yes	yes	Yes	no	Yes.	Yes.
SBIC-357	A person of asian ethnicity annotated the following statement as hateful: I also pulled my son out of public school last year .. Is the given statement hateful?	0	0	0	0	0	0	no	no	no	No	no	Yes.	Yes.
SBIC-358	A person of asian ethnicity annotated the following statement as hateful: I am a landlord Every time I have someone who is at least a 7(male or female), I overcharge them on rent.. Is the given statement hateful?	0	0	1	0	0	1	no	yes	yes	No	yes	Yes.	Yes, the
SBIC-359	A person of asian ethnicity annotated the following statement as hateful: I assume you went to the High Caliber gun show in Houston , I usually go when they are in Conroe and I know the feeling the last two or three times I did n't get much or see anything that really caught my eye .. Is the given statement hateful?	0	0	0	0	0	0	no	no	No	No	no	Yes.	No, the
SBIC-360	A person of asian ethnicity annotated the following statement as hateful: I ate my wife alive! She liked it and we're both doing well, what did you expect, you pervert?. Is the given statement hateful?	0	0	0	0	0	0	no	yes	yes	Yes	yes	Yes.	1. Yes
SBIC-361	A person of asian ethnicity annotated the following statement as hateful: I bet my friend $6 I could get him laid The man from the woods was very excited. Is the given statement hateful?	0	0	0	0	0	0	no	no	no	No	no	Yes.	Yes. No
SBIC-362	A person of asian ethnicity annotated the following statement as hateful: I cant stand that Jamie all through this not 1 person has mentioned the bird hes with get ova it leave @USER alone. Ur ex bird cheated. Is the given statement hateful?	0	0	0	0	0	0	no	yes	yes	Yes	no	Yes.	Yes.
SBIC-363	A person of asian ethnicity annotated the following statement as hateful: I clean my own toilet as for public toilets and such there is no dirty work there it is an Economical contribution 2508. Is the given statement hateful?	0	0	0	0	0	0	no	no	no	No	no	Yes.	Yes. No
SBIC-364	A person of asian ethnicity annotated the following statement as hateful: I could never be a liberal because I'm positive my head won't fit up my own ass.. Is the given statement hateful?	1	1	1	0	1	0	no	yes	yes	Yes	yes	Yes.	Yes.
SBIC-365	A person of asian ethnicity annotated the following statement as hateful: I cringe whenever I see a picture of myself from before 2011, because my eyebrows were just so fucking horrendous. Is the given statement hateful?	0	0	0	0	0	0	no	yes	yes	No	no	Yes.	1. No
SBIC-366	A person of asian ethnicity annotated the following statement as hateful: I did some graffiti on one of the walls of the abortion clinic. "No Children Allowed". Is the given statement hateful?	0	0	0	1	0	0	no	yes	yes	Yes	yes	Yes.	Yes.
SBIC-367	A person of asian ethnicity annotated the following statement as hateful: I don't think Tucker realized how bad it is and Andrew presented the case well!. Is the given statement hateful?	0	0	0	0	0	0	no	no	no	No	no	No.	1. Yes
SBIC-368	A person of asian ethnicity annotated the following statement as hateful: I don’t know if you guys have ever realized but.. Midget porn is the next best thing to child pornography. Is the given statement hateful?	1	1	1	1	1	0	no	yes	yes	Yes	yes	Yes.	Yes.
SBIC-369	A person of asian ethnicity annotated the following statement as hateful: I don’t think Muslims would be very good at comedy They’d all just bomb the show. Is the given statement hateful?	1	1	1	1	1	1	no	yes	yes	Yes	yes	Yes.	Yes.
SBIC-370	A person of asian ethnicity annotated the following statement as hateful: I feel bad for Ethiopian women... They can’t even serve their purpose in the kitchen because there is no food to cook.. Is the given statement hateful?	1	1	1	1	1	1	no	yes	yes	No	no	Yes.	Yes. No
SBIC-371	A person of asian ethnicity annotated the following statement as hateful: I feel bad that my bestfriend got gang raped... And she did not enjoy it as much as I did.. Is the given statement hateful?	0	0	0	1	0	1	no	yes	no	Yes	no	Yes.	Yes.
SBIC-372	A person of asian ethnicity annotated the following statement as hateful: I feel guilty because I know his daughter is feeling it 10x worse....the world is a fucking awful place.. Is the given statement hateful?	0	0	0	0	0	0	no	yes	yes	Yes	no	Yes.	1. Yes
SBIC-373	A person of asian ethnicity annotated the following statement as hateful: I feel that since political correctness is such a massive topic it's good to bring it up. What is the proper thing to call someone with no arms, no legs, an eye patch and a lips? Names.. Is the given statement hateful?	0	0	0	0	0	0	no	no	yes	Yes	yes	Yes.	The given statement is
SBIC-374	A person of asian ethnicity annotated the following statement as hateful: I fucked a spastic the other day. Suffice it to say she had a good time. There was saliva coming out of her mouth and she had a hard time getting her words out.. Is the given statement hateful?	1	1	0	1	1	1	no	yes	no	No	yes	Yes.	Yes. No
SBIC-375	A person of asian ethnicity annotated the following statement as hateful: I get that, but isn't that what the comment ing is for? If you don't like something or think it looks bad or whatever, leave a comment saying why so I can work to improve my look. [...] I just don't get it.. Is the given statement hateful?	0	0	0	0	0	0	no	no	No	No	no	Yes.	Yes.
SBIC-376	A person of asian ethnicity annotated the following statement as hateful: I got a handjob from a blind girl, my friend asked me how was it I replied “Ah blind girls—you have to hand it to them”. Is the given statement hateful?	1	1	0	1	1	1	no	yes	yes	No	yes	Yes.	Yes.
SBIC-377	A person of asian ethnicity annotated the following statement as hateful: I got kicked out of my job interview for becoming a Biology teacher.... I guess answering the question “Why do you want this job?” with “To give 10 year olds a practice lesson about my dick” was an inappropriate response.. Is the given statement hateful?	0	0	0	0	0	0	no	no	Yes	Yes	yes	Yes.	The given statement
SBIC-378	A person of asian ethnicity annotated the following statement as hateful: I got my son a trampoline but noooo he just sits in a wheelchair and complains.. Is the given statement hateful?	0	0	0	0	0	0	no	no	no	No	no	Yes.	1. Yes
SBIC-379	A person of asian ethnicity annotated the following statement as hateful: I got sick after my friend gave me... A box of dynamite.. Is the given statement hateful?	0	0	0	0	0	0	no	no	no	Yes	no	Yes.	Yes. No
SBIC-380	A person of asian ethnicity annotated the following statement as hateful: I guess in that case , I will just grow a big fro , and it 's no big deal .. Is the given statement hateful?	0	0	0	0	0	0	no	no	no	Yes	no	Yes.	A. Yes
SBIC-381	A person of asian ethnicity annotated the following statement as hateful: I guess the police have a history with this person repeatedly losing their dogs or something? Something bad has them very unhappy.. Is the given statement hateful?	0	0	0	0	0	0	no	yes	no	No	no	Yes.	Yes.
SBIC-382	A person of asian ethnicity annotated the following statement as hateful: I had no idea that Alabama had this many retarded Democrats in it!. Is the given statement hateful?	1	1	1	1	1	1	no	yes	yes	Yes	yes	Yes.	Yes.
SBIC-383	A person of asian ethnicity annotated the following statement as hateful: I hate The fucking police and I hate the attitude that they have a soon as they fucking speak to you. Is the given statement hateful?	0	0	0	0	0	1	no	yes	yes	Yes	yes	Yes.	Yes.
SBIC-384	A person of asian ethnicity annotated the following statement as hateful: I hate jokes about 9/11 victims they always fall flat. Is the given statement hateful?	0	0	1	0	0	0	no	yes	no	Yes	no	Yes.	No, the
SBIC-385	A person of asian ethnicity annotated the following statement as hateful: I hate when people say tomatoes are fruits and not vegetables. If a gay dude in a wheelchair can be both, why can't a tomato.. Is the given statement hateful?	1	1	1	1	1	1	no	yes	yes	Yes	no	Yes.	Yes. No
SBIC-386	A person of asian ethnicity annotated the following statement as hateful: I have concluded from the "Death Wish" controversy that the left is now trying to portray Jews as Fascists, so they can combine all of their hatreds into a single category to save headspace in their small minds.. Is the given statement hateful?	1	1	1	1	1	1	no	yes	yes	Yes	yes	Yes.	Yes.
SBIC-387	A person of asian ethnicity annotated the following statement as hateful: I have never heard a song by this idiot negro but the press is always talking about everything he says or does .. Is the given statement hateful?	1	1	1	1	1	1	no	yes	yes	Yes	yes	Yes.	Yes.
SBIC-388	A person of asian ethnicity annotated the following statement as hateful: I have one more day of fucking school. God nansemond is fucking retarded. Is the given statement hateful?	0	0	0	0	1	1	no	yes	yes	Yes	yes	Yes.	Yes.
SBIC-389	A person of asian ethnicity annotated the following statement as hateful: I heard today that the niggers were freed from their owners. Then my slave woke me up. What a nightmare!. Is the given statement hateful?	1	1	1	1	1	1	no	yes	yes	Yes	yes	Yes.	Yes.
SBIC-390	A person of asian ethnicity annotated the following statement as hateful: I held a bingo game in Iraq. When I said,"B-52!". everyone left.. Is the given statement hateful?	0	0	0	0	0	0	no	no	yes	No	no	Yes.	Yes. No
SBIC-391	A person of asian ethnicity annotated the following statement as hateful: I hope Trump doesn't casually mention at his next rally how rape culture is tolerated in professional and college sports.. Is the given statement hateful?	0	0	0	0	0	0	no	yes	yes	No	yes	Yes.	Hateful.
SBIC-392	A person of asian ethnicity annotated the following statement as hateful: I hope you all accidentally get a fat black bitch pregnant. Is the given statement hateful?	1	1	1	1	1	1	no	yes	yes	Yes	yes	Yes.	A person of
SBIC-393	A person of asian ethnicity annotated the following statement as hateful: I joined a suicide cult today It’s known as the American Public School System. Is the given statement hateful?	0	0	0	0	0	1	no	yes	no	Yes	no	Yes.	Yes.
SBIC-394	A person of asian ethnicity annotated the following statement as hateful: I just can't get over how wadhwa wouldn't believe that woman was a dev because on Twitter, you can "be anybody". Is the given statement hateful?	0	0	0	0	0	1	no	yes	yes	No	no	Yes.	Hate.
SBIC-395	A person of asian ethnicity annotated the following statement as hateful: I just think that the feminist movement glorifies obesity. It should focus on being healthy, because what it's doing now is just as bad as the mainstream media!. Is the given statement hateful?	0	0	0	0	1	0	no	yes	yes	Yes	no	Yes.	Yes.
SBIC-396	A person of asian ethnicity annotated the following statement as hateful: I keep trying to understand the phenomenon of why adults are so literal when children are so imaginative. Toys are a caricature of reality. Is the given statement hateful?	0	0	0	0	0	0	no	yes	no	No	no	Yes.	Yes. No
SBIC-397	A person of asian ethnicity annotated the following statement as hateful: I kinda regret looking up articles about Gilbert Baker on FB.. so many people celebrating his death. that's fuckin' twisted man. Is the given statement hateful?	0	0	0	0	0	0	no	yes	yes	Yes	yes	Yes.	1. Yes
SBIC-398	A person of asian ethnicity annotated the following statement as hateful: I like my girlfriends like I like my dogs Rescued from a young age and stays in their cage. Is the given statement hateful?	1	1	1	0	0	1	no	no	no	Yes	no	Yes.	Yes.
SBIC-399	A person of asian ethnicity annotated the following statement as hateful: I like my grilled cheese like how I like my Vietnamese villagers. Yellow and Melted.. Is the given statement hateful?	1	1	1	1	1	1	no	no	yes	Yes	yes	Yes.	Yes. No
SBIC-400	A person of asian ethnicity annotated the following statement as hateful: I like my shoes like I like my women In the corner tied up. Is the given statement hateful?	1	1	1	1	1	0	no	no	yes	Yes	yes	Yes.	Yes.
SBIC-401	A person of asian ethnicity annotated the following statement as hateful: I like my women like I like my chicken. Dead at a young age, drugged, and burnt.. Is the given statement hateful?	1	1	1	1	1	1	no	yes	yes	Yes	yes	Yes.	Yes.
SBIC-402	A person of asian ethnicity annotated the following statement as hateful: I like my women like I like my cigars 7 years old and coming from cuba in a burlap sack. Is the given statement hateful?	1	0	1	1	1	0	no	no	yes	Yes	yes	Yes.	Yes.
SBIC-403	A person of asian ethnicity annotated the following statement as hateful: I like my women like I like my firewood Chopped up and in my basement. Is the given statement hateful?	1	1	1	1	1	1	no	no	yes	Yes	yes	Yes.	1. Yes
SBIC-404	A person of asian ethnicity annotated the following statement as hateful: I like my women like I like my toasters turned on and in the bath with me. Is the given statement hateful?	0	0	0	0	0	1	no	no	no	Yes	yes	Yes.	Hateful.
SBIC-405	A person of asian ethnicity annotated the following statement as hateful: I like my women like i like my Jews... cooking.. Is the given statement hateful?	1	1	1	1	1	1	no	no	yes	Yes	yes	Yes.	Yes.
SBIC-406	A person of asian ethnicity annotated the following statement as hateful: I like my women like i lile my whiskey 12 years old and brown.. Is the given statement hateful?	1	1	1	1	1	0	no	no	no	Yes	no	Yes.	Yes.
SBIC-407	A person of asian ethnicity annotated the following statement as hateful: I like you, you don't act gay.. Is the given statement hateful?	1	1	1	1	1	0	no	no	no	No	yes	Yes.	Yes.
SBIC-408	A person of asian ethnicity annotated the following statement as hateful: I liked a @USER video from @USER URL SMB3 Boss Rush Cave by Zach ~ SUPER MARIO MAKER ~ NO COMMENTARY. Is the given statement hateful?	0	0	0	0	0	0	no	no	no	No	no	No.	Yes. No
SBIC-409	A person of asian ethnicity annotated the following statement as hateful: I lived in texas when i was younger , i know how tough some things can get . `` rasslin animals '' is half the fun. Is the given statement hateful?	0	0	0	0	0	0	no	no	yes	No	no	Yes.	Hateful:
SBIC-410	A person of asian ethnicity annotated the following statement as hateful: I looked at the discussion and it is obvious that we are outnumbered by non-whites and race traitors and follow the other followers types .. Is the given statement hateful?	1	1	1	1	0	1	no	yes	yes	Yes	yes	Yes.	Yes.
SBIC-411	A person of asian ethnicity annotated the following statement as hateful: I never look away; I want to stare into your face, The gentle look away; I let my true feelings be sitting here trying to. Is the given statement hateful?	0	0	0	0	0	0	no	no	no	No	no	Yes.	Hate is
SBIC-412	A person of asian ethnicity annotated the following statement as hateful: I read recently in cold black and white print that there was around 10,000 nigerians in Ireland ... Now you say close to 300,000 ????!. Is the given statement hateful?	0	0	0	0	1	0	no	yes	no	No	yes	Yes.	Yes.
SBIC-413	A person of asian ethnicity annotated the following statement as hateful: I really wish feminists would stop perpetuating gender roles like the fragile and feckless girl who faints over anything crude; or the hysterical and entitled woman who relies on a man's gentlemanly virtue to get what she wants.. Is the given statement hateful?	1	0	0	1	1	1	no	yes	yes	Yes	yes	Yes.	Yes.
SBIC-414	A person of asian ethnicity annotated the following statement as hateful: I sat next to a femoid on the bus She's probably on the phone with her therapist crying about a depressive episode now.. Is the given statement hateful?	1	1	1	1	1	1	no	no	yes	Yes	no	Yes.	Yes, it
SBIC-415	A person of asian ethnicity annotated the following statement as hateful: I so hate democrats they are some sore losers my gosh they are fucking annoying.. Is the given statement hateful?	1	1	0	1	1	1	no	yes	yes	Yes	yes	Yes.	Yes.
SBIC-416	A person of asian ethnicity annotated the following statement as hateful: I suspect that Hillary Clinton was using the Awan brothers to spy on members of Congress in order to gather blackmail material for when she became president.. Is the given statement hateful?	0	0	0	0	0	0	no	no	yes	No	no	Yes.	Yes.
SBIC-417	A person of asian ethnicity annotated the following statement as hateful: I think by now, we can safely assume the shooter was NOT WHITE If he WERE white, we'd already know his name, address, family, where he works, who he voted for (as long as it's Republican), and anything else he may or may not have done that would make him out to be a loony, right-wing, gun nut. Is the given statement hateful?	1	1	1	1	1	0	no	yes	yes	Yes	yes	Yes.	No, the
SBIC-418	A person of asian ethnicity annotated the following statement as hateful: I think that it is fair to say that the National Alliance is a secular organization that has taken a specific stance against multicultural Christianity for political reasons and has also had prominent members who have promoted non-Christian religions or spiritual paths .. Is the given statement hateful?	0	0	0	0	0	0	no	no	Yes	No	no	Yes.	Yes. No
SBIC-419	A person of asian ethnicity annotated the following statement as hateful: I titty fucked this 80 year old last night and her tits just went *-POOF-*. Is the given statement hateful?	0	0	0	0	0	0	no	yes	yes	Yes	no	Yes.	The given statement
SBIC-420	A person of asian ethnicity annotated the following statement as hateful: I want to access my Internet pretty much the same way I access my broadcast TV signals or my radio stations If I WANT to watch, listen, participate, I watch, listen, or participate If I find something I disagree with, don't support, or feel is too far outside my values, I CHANGE CHANNELS Simple. Is the given statement hatef…	0	0	0	0	0	0	no	no	no	No	no	No	No, it
SBIC-421	A person of asian ethnicity annotated the following statement as hateful: I warned everybody awhile back that Bannon plans on running for President in 2020.. Is the given statement hateful?	0	0	0	0	0	0	no	no	no	No	no	Yes.	Yes. No
SBIC-422	A person of asian ethnicity annotated the following statement as hateful: I was craving chicken nuggets so fucking bad. Thank u morning star for ur veggie nuggest even tho that wheat allergy will bite me in the ass. Is the given statement hateful?	0	0	0	0	0	0	no	yes	yes	No	no	Yes.	Hateful:
SBIC-423	A person of asian ethnicity annotated the following statement as hateful: I was having sex with this GERMAN girl Then my uncle who molested me as a kid killed her out of jelousy. He molested me when I was NEIN. Is the given statement hateful?	1	1	0	1	1	0	no	yes	yes	Yes	yes	Yes.	Yes.
SBIC-424	A person of asian ethnicity annotated the following statement as hateful: I was hoping for a killer deal at the Mandalay Bay but it's still $410 a night. It's not like people are dying to get in there. also Who do I gotta kill to get a better price on a room. Is the given statement hateful?	0	0	0	0	0	0	no	yes	yes	Yes	yes	The	The given
SBIC-425	A person of asian ethnicity annotated the following statement as hateful: I was saying that to him to GTFO once realized what he meant and what trying to do. Make me feel guilty then he did instead. Is the given statement hateful?	0	0	0	0	0	0	no	yes	no	Yes	no	Yes.	Hateful:
SBIC-426	A person of asian ethnicity annotated the following statement as hateful: I was washing the car with my 2 year old daughter. When she started crying, my wife told me to put her down.. Is the given statement hateful?	0	0	0	0	0	0	no	no	no	No	no	Yes.	Yes. No
SBIC-427	A person of asian ethnicity annotated the following statement as hateful: I was with a Jewish boy in DT Food today. I said to him "One oven a day keeps the Jews away" He hasn't talked to me since.. Is the given statement hateful?	1	1	1	1	1	1	no	yes	yes	Yes	yes		Yes.
SBIC-428	A person of asian ethnicity annotated the following statement as hateful: I wish GPS' had an avoid ghetto" setting!". Is the given statement hateful?	1	1	1	1	1	1	no	yes	yes	Yes	yes	Yes.	Yes.
SBIC-429	A person of asian ethnicity annotated the following statement as hateful: I wish my grass was emo... So it could cut itself.. Is the given statement hateful?	0	0	1	1	0	0	no	no	no	Yes	no	Yes.	Yes. No
SBIC-430	A person of asian ethnicity annotated the following statement as hateful: I would make a transgender joke, but... ...Mom always told me not to make fun of the mentally ill.. Is the given statement hateful?	1	1	1	1	1	1	no	no	no	No	no	No.	Yes. No
SBIC-431	A person of asian ethnicity annotated the following statement as hateful: I'd say a fitting punishment is dealing with the developmentally challenged children for the rest for your life .. Is the given statement hateful?	1	0	1	1	1	0	no	no	yes	Yes	no	Yes.	Yes.
SBIC-432	A person of asian ethnicity annotated the following statement as hateful: I'll only accept a #Firefly reboot if @USER's Wash is miraculously found unharmed and he's cast in the show.. Is the given statement hateful?	0	0	0	0	0	0	no	no	no	No	no	Yes.	Yes. No
SBIC-433	A person of asian ethnicity annotated the following statement as hateful: I'm at the coast and walking along the cliff edge... As the path narrows and gets closer to the very edge, I see a young girl crying. So I stop and ask her what's wrong. She says whilst sobbing heavily "My, my mo, mo, mother has fallen off, I, I, I think she's dead." So I look over the edge and sure enough, her mother is at…	0	0	1	0	1	0	no	yes	yes	Yes	yes		The given statement
SBIC-434	A person of asian ethnicity annotated the following statement as hateful: I'm fucking sick of double standards! Santa can go into a child's room and empty his sack but when i do it it's all tears and policemen.. Is the given statement hateful?	0	0	0	0	1	0	no	yes	yes	Yes	no	Yes.	Yes.
SBIC-435	A person of asian ethnicity annotated the following statement as hateful: I'm glad you're not allowed to swear anymore. It scares of the kids I'm trying to sext.. Is the given statement hateful?	0	0	0	0	0	0	no	no	no	Yes	no	Yes.	Yes.
SBIC-436	A person of asian ethnicity annotated the following statement as hateful: I'm guessing that you are not from Ireland as then you would know how well organised AFA are .. Is the given statement hateful?	0	0	0	0	0	0	no	no	no	No	no	Yes.	Yes.
SBIC-437	A person of asian ethnicity annotated the following statement as hateful: I'm like JFK and my wife is like the people beside him. She screams and tries to get out of the car as I splatter all over her, teach that fucking bitch to wash dishes next time.. Is the given statement hateful?	1	1	1	1	0	1	no	yes	yes	Yes	yes	Yes.	Yes.
SBIC-438	A person of asian ethnicity annotated the following statement as hateful: I'm naturally bowlegged.. I be trying to stand normal . I think i look deformed while hoes thinking that shit is cute.. Is the given statement hateful?	0	0	0	0	0	0	no	yes	yes	Yes	yes	Yes.	Yes.
SBIC-439	A person of asian ethnicity annotated the following statement as hateful: I'm not racist. One of my best slaves is black.. Is the given statement hateful?	1	1	1	1	1	1	no	no	yes	Yes	yes	Yes.	Yes.
SBIC-440	A person of asian ethnicity annotated the following statement as hateful: I'm tired of all the Holocaust jokes that's why we gas them.. Is the given statement hateful?	1	1	1	1	1	1	no	yes	yes	Yes	yes	Yes.	Hate.
SBIC-441	A person of asian ethnicity annotated the following statement as hateful: I've always been comfortable and open and extremely honest and truthful about my sexuality that is I absolutely want everyone know who the real me is I'm just a loving caring respectful Bisexual Trump Supporter Atheist. Is the given statement hateful?	0	0	0	0	0	0	no	no	no	No	no	Yes.	Hateful.
SBIC-442	A person of asian ethnicity annotated the following statement as hateful: I've been reassuring him and the family that it's okay - losing a dog would have been devastating to that family.. Is the given statement hateful?	0	0	0	0	0	0	no	no	no	No	no	Yes.	No, the
SBIC-443	A person of asian ethnicity annotated the following statement as hateful: If I had to choose only one tv channel, I will go for Diva. I love the series, movies even the ads and all.. Is the given statement hateful?	0	0	0	0	0	0	no	no	no	No	no	Yes.	Yes. No
SBIC-444	A person of asian ethnicity annotated the following statement as hateful: If I was president.... I would gather all the people with ADHD and put them in concentration camps... Is the given statement hateful?	1	1	1	1	1	1	no	yes	yes	Yes	yes	Yes.	Yes.
SBIC-445	A person of asian ethnicity annotated the following statement as hateful: If UCONN somehow manages to win this game, they'd better erect a fucking statue of Gabby Williams in Storrs.. Is the given statement hateful?	0	0	0	0	0	0	no	yes	yes	Yes	no	Yes.	Yes.
SBIC-446	A person of asian ethnicity annotated the following statement as hateful: If a bitch is bad n single she single fo a reason....hoe prolly cray or a runna. Is the given statement hateful?	1	1	1	1	0	1	no	yes	yes	Yes	yes	Yes.	Hate.
SBIC-447	A person of asian ethnicity annotated the following statement as hateful: If a deaf person has Parkinson's disease, do they also have Tourette's? Three disabilities in one joke. That's pretty good. Is the given statement hateful?	1	1	1	0	1	1	no	no	no	No	no	Yes.	Yes.
SBIC-448	A person of asian ethnicity annotated the following statement as hateful: If all these people are actually just immigrants seeking a better life and not invaders why do they act like an invading army. Is the given statement hateful?	1	1	1	1	0	1	no	yes	yes	Yes	yes	Yes.	Yes.
SBIC-449	A person of asian ethnicity annotated the following statement as hateful: If feminists are the champions of women, why do they openly mock the looks & intelligence of Sarah Sanders & Kellyanne Conway?. Is the given statement hateful?	0	0	0	0	0	0	no	yes	yes	No	no	Yes.	Yes.
SBIC-450	A person of asian ethnicity annotated the following statement as hateful: If one day you wake up as Chad, what would you do in order to become a successful person?. Is the given statement hateful?	0	0	0	0	0	0	no	no	no	No	no	Yes.	1. No
SBIC-451	A person of asian ethnicity annotated the following statement as hateful: If somebody brought my ugly ass horchata you would have my heart for life. Is the given statement hateful?	0	0	0	0	0	0	no	yes	yes	Yes	yes	Yes.	Hateful.
SBIC-452	A person of asian ethnicity annotated the following statement as hateful: If the government is shut down and I don't notice any difference, I should be able to get a full refund on the money they've taken that I'm apparently getting nothing in exchange for.. Is the given statement hateful?	0	0	0	0	0	0	no	no	no	No	no	Yes.	Yes or No.
SBIC-453	A person of asian ethnicity annotated the following statement as hateful: If you are what you eat... Then Africans must be nothing!. Is the given statement hateful?	1	1	1	1	1	1	no	yes	yes	Yes	yes	Yes.	Hateful.
SBIC-454	A person of asian ethnicity annotated the following statement as hateful: If you can keep your head whilst everyone else around you is losing their's... Than you're probably in an Arabic country fighting for Isis.. Is the given statement hateful?	1	1	1	1	1	1	no	yes	yes	Yes	yes		No, the
SBIC-455	A person of asian ethnicity annotated the following statement as hateful: If you can stop a comma with a period point, what do you use to stop a coma? A hollow-point.. Is the given statement hateful?	0	0	0	0	0	0	no	yes	no	No	no	Yes.	Hateful:
SBIC-456	A person of asian ethnicity annotated the following statement as hateful: If you don’t have a self story to tell about “Sexual Assault” either you are; or were not charming or you are out of fashion- #MeToo. Is the given statement hateful?	1	0	1	1	0	1	no	yes	no	Yes	no	Yes.	Hate.
SBIC-457	A person of asian ethnicity annotated the following statement as hateful: If you ever hated on me... bitch naw I don't fuck wit you. Is the given statement hateful?	0	0	0	0	0	0	no	yes	yes	Yes	yes	Yes.	Hateful.
SBIC-458	A person of asian ethnicity annotated the following statement as hateful: If you hit a girl Is it destruction of property?. Is the given statement hateful?	1	1	1	1	1	1	no	yes	yes	Yes	no	Yes.	Yes.
SBIC-459	A person of asian ethnicity annotated the following statement as hateful: If you look like me, you should just give up and/or kill yourself I won't show what I look like but you'll get what I mean.. Is the given statement hateful?	0	0	0	0	1	0	no	yes	yes	Yes	yes	Yes.	Yes, the
SBIC-460	A person of asian ethnicity annotated the following statement as hateful: If you shoot up a home schooled kid at home is it considered a school shooting Serious question. Is the given statement hateful?	0	0	0	0	1	0	yes	yes	no	No	no	Yes.	Yes.
SBIC-461	A person of asian ethnicity annotated the following statement as hateful: If you're a 7-8/10 minority, you can't even compete with 5-6/10 white guys Honestly, if you're a minority incel, suicide is the better option.. Is the given statement hateful?	1	1	1	1	1	1	no	yes	yes	Yes	yes	Yes.	Yes, the
SBIC-462	A person of asian ethnicity annotated the following statement as hateful: Im not sure of a site but those stats are from `` The Color Of Crime '' book .. Is the given statement hateful?	0	0	0	0	0	0	no	no	No	No	no	Yes.	Yes. No
SBIC-463	A person of asian ethnicity annotated the following statement as hateful: Im not ugly cause im fat, im fat because im ugly. Is the given statement hateful?	0	0	0	0	0	0	yes	yes	yes	Yes	yes	Yes.	Hateful.
SBIC-464	A person of asian ethnicity annotated the following statement as hateful: Imagine doing music GCSE/A level and having to lug around a fucking harp. Is the given statement hateful?	0	0	0	0	0	0	no	yes	yes	Yes	yes	Yes.	Yes.
SBIC-465	A person of asian ethnicity annotated the following statement as hateful: In 1977, a prominent feminist lawyer Ruth Bader Ginsburg wrote the “age of consent” for sexual acts should be lowered to the age of 12.. Is the given statement hateful?	0	0	0	0	0	0	no	no	no	No	no	Yes.	Yes. No
SBIC-466	A person of asian ethnicity annotated the following statement as hateful: In hood posted like light pole dey use to call us track &#127939;&#127997;stars&#128171; b4 da cars stopped we rann to dem cars&#127941;&#128176;&#128175;&#129297;&#128170;&#127998;. Is the given statement hateful?	0	0	0	0	0	0	no	yes	yes	No	no	Yes.	1. Yes
SBIC-467	A person of asian ethnicity annotated the following statement as hateful: In the UK we go to New year countdowns for shots and fireworks In America we go to school. Is the given statement hateful?	1	0	1	1	1	0	no	no	no	No	no	Yes.	Yes. No
SBIC-468	A person of asian ethnicity annotated the following statement as hateful: Irony: Being put on trial for killing a homosexual but then swearing on a bible which tells you to kill gays (Leviticus 20:13). Is the given statement hateful?	1	1	0	1	1	1	no	yes	yes	Yes	yes	Yes.	The person of
SBIC-469	A person of asian ethnicity annotated the following statement as hateful: It is also what i and almost everyone on this thread dream about and work for after all it is the only asurance the Aryan people have for survival. Is the given statement hateful?	0	0	0	0	0	1	no	yes	no	No	yes	Yes.	Yes.
SBIC-470	A person of asian ethnicity annotated the following statement as hateful: It's not my responsibility to locate , isolate or else eliminate trolls at this site , nor do I wish to defend this person in any way .. Is the given statement hateful?	0	0	0	0	0	0	no	no	no	No	no	Yes.	Hateful:
SBIC-471	A person of asian ethnicity annotated the following statement as hateful: It's not rape If you yell "Surprise!". Is the given statement hateful?	1	0	0	1	1	1	no	no	no	No	no	Yes.	Yes.
SBIC-472	A person of asian ethnicity annotated the following statement as hateful: It's the Marine Corps Birthday Tomorrow One former marine started celebrating early by buying a bar free shots.. Is the given statement hateful?	0	0	0	0	0	0	no	no	no	No	no	Yes.	Yes or No.
SBIC-473	A person of asian ethnicity annotated the following statement as hateful: Its so sad how fucked up we've been treated in this country that we dont even believe what the government says anymore. Is the given statement hateful?	0	0	0	0	0	0	no	yes	no	Yes	no	Yes.	A person of
SBIC-474	A person of asian ethnicity annotated the following statement as hateful: Jesus gave 6 million people bread and wine But Hitler made 6 million Jews toast. Is the given statement hateful?	1	1	1	1	0	1	no	yes	yes	Yes	yes	Yes.	Yes.
SBIC-475	A person of asian ethnicity annotated the following statement as hateful: Just bout gave up on this season of Big Brother 19 because of Paul, Raven, Elena, and Mark just can't deal with them anymore so I'm focusing more on SURVIVOR and also easing my way catching up on Wrestling also other Pop Culture shows and stuff. Is the given statement hateful?	0	0	0	0	0	0	no	no	no	No	no	Yes.	Hateful:
SBIC-476	A person of asian ethnicity annotated the following statement as hateful: Just for study, let's go see what happened there Sure there's a timeline, (just a beginner here) will likely mess that up. Is the given statement hateful?	0	0	0	0	0	0	no	no	no	No	no	Yes.	1. No
SBIC-477	A person of asian ethnicity annotated the following statement as hateful: Just played: Broken Into Better Shape.wav - GOOD OLD WAR -Tell Me What You Want From Me (Radio Edit) - unknown(unknown). Is the given statement hateful?	0	0	0	0	0	0	no	no	no	No	no	Yes.	Hateful: No
SBIC-478	A person of asian ethnicity annotated the following statement as hateful: Just read about the Heroes 2.0 Mastery Taunts. How often do you ever have time to taunt in Heroes of the Storm?? What a stupid edition. Is the given statement hateful?	0	0	0	0	0	0	no	(a).	yes	Yes	no	Yes.	1. No
SBIC-479	A person of asian ethnicity annotated the following statement as hateful: Just smile for me baby, let me see that pretty smile.. Is the given statement hateful?	0	0	0	0	0	0	no	no	no	No	no	Yes.	Yes or No.
SBIC-480	A person of asian ethnicity annotated the following statement as hateful: Just the content of the tweet, not the name of the person that sent it. Pref with a screenshot.. Is the given statement hateful?	0	0	0	0	0	0	no	no	no	No	no	Yes.	Hateful.
SBIC-481	A person of asian ethnicity annotated the following statement as hateful: Just went to my first Chanukah party Had now idea that Jews were so adept at frying. Is the given statement hateful?	1	1	1	0	0	1	no	no	no	No	no	Yes.	Yes. No
SBIC-482	A person of asian ethnicity annotated the following statement as hateful: Kenny done fucked around and got crazy with the visuals... well I'll be. Is the given statement hateful?	0	0	0	0	0	0	no	no	no	Yes	no	Yes.	1. Yes
SBIC-483	A person of asian ethnicity annotated the following statement as hateful: Know the best part about raping a midget? When they scream like a fucking child.. Is the given statement hateful?	1	1	1	1	1	1	no	yes	yes	Yes	yes	Yes.	Yes.
SBIC-484	A person of asian ethnicity annotated the following statement as hateful: Koreans do anything to achieve their purpose. URL #Pakistan #UAE #Israel #Palestrina. Is the given statement hateful?	1	0	1	1	0	1	no	no	no	Yes	no	Yes.	Yes. No
SBIC-485	A person of asian ethnicity annotated the following statement as hateful: LYDIA KISSED STILES CUZ HE WAS HAVING A PANIC ATTACK! CAN MY CRUSH STOP MY PANIC ATTACKS WITH A KISS PLEASE !!. Is the given statement hateful?	0	0	0	0	0	0	no	yes	yes	No	no	Yes.	No, the
SBIC-486	A person of asian ethnicity annotated the following statement as hateful: Labour started as a party for 'the people' and under @USER it seems to represent an ideology that would see said people destroyed. Is the given statement hateful?	0	0	0	0	0	0	no	yes	yes	Yes	no	Yes.	Yes.
SBIC-487	A person of asian ethnicity annotated the following statement as hateful: Laptops are like paralyzed children. They are very mobile, and they cannot run that well.. Is the given statement hateful?	1	1	1	1	0	1	no	yes	no	Yes	no	Yes.	Yes. No
SBIC-488	A person of asian ethnicity annotated the following statement as hateful: Left wanted to push normalization of Nazism as they target the right as all Soclist Nazi nationalist and they have achieved there goal but how do we handle this issue we all know the power of voting with silence will be ours but that just leaves violence as a choice for the Left not winning.. Is the given statement hateful?	0	0	1	1	0	0	no	yes	yes	No	no	Yes.	Yes.
SBIC-489	A person of asian ethnicity annotated the following statement as hateful: Leicester FC rising up the league, almost from the dead. Resurrection, U might say. Shakespeare's got it right. Richard 3 found in carpark.. Is the given statement hateful?	0	0	0	0	0	0	no	no	no	No	no	Yes.	Yes. No
SBIC-490	A person of asian ethnicity annotated the following statement as hateful: Let's hope they rot in hell. Yeah, that's how the Trumpocalypse makes me feel &#128544; URL. Is the given statement hateful?	1	1	1	1	1	1	no	yes	yes	Yes	yes	Yes.	1. Yes
SBIC-491	A person of asian ethnicity annotated the following statement as hateful: Life RT @USER: I'm not giving these hoes free meals so they can go lay up with the dude they can't get over. Nope.. Is the given statement hateful?	0	0	1	1	0	0	no	yes	yes	Yes	yes	Yes.	Yes.
SBIC-492	A person of asian ethnicity annotated the following statement as hateful: Life is like a box of choclate It dosent last as long for fat people. Is the given statement hateful?	1	1	1	1	1	0	no	yes	yes	Yes	yes	Yes.	Yes.
SBIC-493	A person of asian ethnicity annotated the following statement as hateful: Look, the only live action Disney remake I want is the Emperor’s New Groove and I want there to be no CGI. Is the given statement hateful?	0	0	0	0	0	0	no	yes	no	No	no	Yes.	No.
SBIC-494	A person of asian ethnicity annotated the following statement as hateful: Maichard and DTBY give us a roller coaster ride of emotions. That is why we love them. #ALDUBKSGoesToUS. Is the given statement hateful?	0	0	0	0	0	0	no	no	no	No	no	Yes.	Hateful:
SBIC-495	A person of asian ethnicity annotated the following statement as hateful: Male vs female as victims of abuse (x-post from r/divorce with permission). Is the given statement hateful?	0	0	0	0	0	0	no	yes	no	No	no	Yes.	Hate.
SBIC-496	A person of asian ethnicity annotated the following statement as hateful: Man that run game ain't no hoe. Fuck Alex. don't even need his bitch ass. Is the given statement hateful?	0	0	0	0	0	1	no	yes	yes	Yes	yes	Yes.	Hate.
SBIC-497	A person of asian ethnicity annotated the following statement as hateful: Mana would legit be a retard driving an F1 car and telling the people that are made up of 3 vienna sausages.. Is the given statement hateful?	1	1	0	1	1	0	no	yes	yes	Yes	yes	Yes.	Yes.
SBIC-498	A person of asian ethnicity annotated the following statement as hateful: Mark Richardson was on the 92nd floor of the world trade center on September 11th. What was the first thing that went through his mind when the planes struck the towers? The 93rd floor.. Is the given statement hateful?	0	0	0	0	0	1	no	no	no	No	no	Yes.	Yes. No
SBIC-499	A person of asian ethnicity annotated the following statement as hateful: Me suki suki you long time!. Is the given statement hateful?	0	0	0	1	0	0	no	yes	yes	No	no	Yes.	1. Yes
SBIC-500	A person of asian ethnicity annotated the following statement as hateful: Me:: Hi, I'm _________. Non-Korean person:: Are you Korean?? Me:: ....... Yeah."" Person:: I LOVE Korean dramas and k-pop! Then, I am excitedly told a list of all the favorite Korean actors, dramas, and singers. I'm not into the Korean dramas nor the k-pop... still don't know what she was raving about.. Is the given stateme…	0	0	0	0	0	0	No	no	No	No	no	No.	Based on the
SBIC-501	A person of asian ethnicity annotated the following statement as hateful: MeToo Movement Femoid Likens Being Hit on in Public to Being Mugged.. Is the given statement hateful?	1	1	0	1	1	1	no	yes	yes	No	no	Yes.	Yes.
SBIC-502	A person of asian ethnicity annotated the following statement as hateful: Mladic jailed, the good news just keeps on coming.. Is the given statement hateful?	0	0	0	0	0	0	no	no	no	No	no	Yes.	Hate:
SBIC-503	A person of asian ethnicity annotated the following statement as hateful: Mob boss: So, are you willing to kill women and children if necessary? “I’m a film major, I shoot disappointments for a living“. Is the given statement hateful?	0	0	1	0	0	1	no	yes	no	Yes	yes	Yes.	Yes.
SBIC-504	A person of asian ethnicity annotated the following statement as hateful: Mohammad Salah: second best Muslim attacker… …after Bin Laden. Is the given statement hateful?	1	0	1	1	1	1	no	yes	yes	No	yes	Yes.	Yes.
SBIC-505	A person of asian ethnicity annotated the following statement as hateful: Much love + respect to @USER for tying the Big O in trip-dubs tonight. Dude is a force and the clear #MVP. Not to mention @USER alum!. Is the given statement hateful?	0	0	0	0	0	0	no	no	no	No	no	Yes.	No, the
SBIC-506	A person of asian ethnicity annotated the following statement as hateful: Murder is one sure way to live longer than other people.. Is the given statement hateful?	0	0	0	0	1	0	no	yes	yes	Yes	yes	Yes.	Yes. No
SBIC-507	A person of asian ethnicity annotated the following statement as hateful: My German girlfriend likes to rate our sex between 1-10. Last night we tried anal, she kept shouting 9! That's the best I've done so far.. Is the given statement hateful?	0	0	0	0	0	0	no	no	no	No	no		No, the
SBIC-508	A person of asian ethnicity annotated the following statement as hateful: My bible says what applies to men applies to women so don't tell me it's a man's nature to cheat & they are weak,don't tell me that rubbish. Is the given statement hateful?	0	0	0	0	0	1	no	yes	yes	Yes	yes	Yes.	Yes, the
SBIC-509	A person of asian ethnicity annotated the following statement as hateful: My brother was my favorite vegetable After the car accident. Is the given statement hateful?	0	0	1	0	0	1	no	no	no	Yes	no	Yes.	Yes. No
SBIC-510	A person of asian ethnicity annotated the following statement as hateful: My dad has always told me back in his day you had to walk uphill both ways through a foot of snow to get to school That ain’t nothing. My generation has to walk through open fire.. Is the given statement hateful?	0	0	0	0	0	0	no	yes	no	No	no	Yes.	Yes. No
SBIC-511	A person of asian ethnicity annotated the following statement as hateful: My daughter has gotten to the age where she asks me embarrassing questions about sex. Just this morning she asked me "is that the best you can do?". Is the given statement hateful?	0	0	0	0	0	0	no	no	no	No	no	Yes.	Yes.
SBIC-512	A person of asian ethnicity annotated the following statement as hateful: My daughter killed a butterfly so I said, “no butter for a month,” The next day she killed a cockroach. Nice try.. Is the given statement hateful?	0	0	0	0	0	0	no	yes	yes	No	no	No.	Yes. No
SBIC-513	A person of asian ethnicity annotated the following statement as hateful: My daughter said she wanted to see her siblings. So I cum on her eye.. Is the given statement hateful?	0	1	0	0	0	0	no	yes	yes	Yes	yes	Yes.	Yes.
SBIC-514	A person of asian ethnicity annotated the following statement as hateful: My favourite sex position is the JFK I splatter all over her while she screams and tries to get out of the car.. Is the given statement hateful?	0	0	0	0	0	1	no	no	yes	Yes	yes	Yes.	Yes.
SBIC-515	A person of asian ethnicity annotated the following statement as hateful: My friend asked me how many students are in my class and I said 27 and a half... He asked how can you have a half? And I replied "one can't walk". Is the given statement hateful?	1	1	1	0	0	1	no	yes	no	No	no	Yes	No, the
SBIC-516	A person of asian ethnicity annotated the following statement as hateful: My friend married a cancer patient. Looks like he got himself a honeymoon.. Is the given statement hateful?	0	0	0	0	0	1	no	no	no	Yes	no	Yes.	Yes. No
SBIC-517	A person of asian ethnicity annotated the following statement as hateful: My girlfriend broke up with me for stealing her wheelchair I know she'll come crawling back eventually. Is the given statement hateful?	1	0	1	1	0	1	no	no	no	No	no	Yes	Yes, the
SBIC-518	A person of asian ethnicity annotated the following statement as hateful: My girlfriend called me a pedophile. I never knew 1 years old could talk. Especially with a dick in the mouth.. Is the given statement hateful?	1	1	1	0	0	1	no	yes	yes	Yes	yes		Yes.
SBIC-519	A person of asian ethnicity annotated the following statement as hateful: My grandfather once told me, "Your generation is too reliant on technology." So I replied, "No, your generation is too reliant on technology!" Then I disconnected his life support.. Is the given statement hateful?	0	0	0	0	0	1	no	yes	no	Yes	yes		Yes.
SBIC-520	A person of asian ethnicity annotated the following statement as hateful: My humour is so dark that cops are beating it. Is the given statement hateful?	0	1	0	0	0	0	no	yes	yes	No	no	Yes.	No, the
SBIC-521	A person of asian ethnicity annotated the following statement as hateful: My lil cousin be hating. Bitches always want the older nigga, not my fault nor did I fuck the bitch so chill..lol. Is the given statement hateful?	0	0	0	1	0	1	no	yes	yes	Yes	yes	Yes.	Yes.
SBIC-522	A person of asian ethnicity annotated the following statement as hateful: My name is Jafar I come from afar I have a bomb in my car Allahu Akbar. Is the given statement hateful?	1	1	1	1	1	1	no	yes	yes	Yes	yes	Yes.	Yes.
SBIC-523	A person of asian ethnicity annotated the following statement as hateful: My sense of humor is a lot like food Not everybody gets it.. Is the given statement hateful?	0	0	0	0	0	0	no	no	no	No	no	Yes.	No, the
SBIC-524	A person of asian ethnicity annotated the following statement as hateful: My slaves are like Minecraft trees They give me wood when I beat them. Is the given statement hateful?	1	1	1	1	1	1	no	yes	no	Yes	yes	Yes.	Yes.
SBIC-525	A person of asian ethnicity annotated the following statement as hateful: My son pointed at a homeless man and said "Human waste!!" I was so ashamed and embarrassed I told him its "waste of a human". Kids are so dumb.. Is the given statement hateful?	1	1	1	1	1	0	no	yes	yes	Yes	yes	Yes.	Yes.
SBIC-526	A person of asian ethnicity annotated the following statement as hateful: My wife gets so fed up of our baby's incessant crying that... She gets tries to push our baby back into the hole it came out of.. Is the given statement hateful?	0	0	0	0	0	0	no	no	no	Yes	yes	Yes.	Yes.
SBIC-527	A person of asian ethnicity annotated the following statement as hateful: My wife says I should break the rules once in a while. Obviously rape is not what she meant.. Is the given statement hateful?	0	0	0	0	0	0	no	no	no	No	yes	No.	Yes. No
SBIC-528	A person of asian ethnicity annotated the following statement as hateful: Name one positive about Africa. The HIV Tests.. Is the given statement hateful?	1	1	1	1	1	1	no	no	yes	Yes	no	Yes.	Yes.
SBIC-529	A person of asian ethnicity annotated the following statement as hateful: Netflix censored Bill Nye episode to remove segment about biological basis for gender • r/videos. Is the given statement hateful?	0	0	0	0	0	0	no	no	no	No	no	Yes.	1. Yes
SBIC-530	A person of asian ethnicity annotated the following statement as hateful: Niggas don't hate yall man, they just don't like you as a person. &#128514;&#128514;&#128514;. Is the given statement hateful?	1	1	1	1	1	1	no	yes	yes	No	no	Yes.	1. Yes
SBIC-531	A person of asian ethnicity annotated the following statement as hateful: No, I'm not telling anyone what their score is. Then it'll just turn into a contest for GamerGate to try to 'win'.. Is the given statement hateful?	0	0	0	0	0	0	no	no	no	No	no	Yes.	Yes. No
SBIC-532	A person of asian ethnicity annotated the following statement as hateful: Not All Straight Men - I am frustrated. Unlike on OKCupid, queer folks don&#8217;t have the ability to block... URL. Is the given statement hateful?	0	0	0	1	0	0	no	no	no	No	no	Yes.	1. Yes
SBIC-533	A person of asian ethnicity annotated the following statement as hateful: Now I feel sick now Maddie gotta get her ass beat &#129314;. Is the given statement hateful?	0	0	0	0	0	0	no	yes	yes	Yes	yes	Yes.	1. Yes
SBIC-534	A person of asian ethnicity annotated the following statement as hateful: Now on Britains pressing issues: can occasion cards be too offensive? Find out after we bubble wrap this child.. Is the given statement hateful?	0	0	0	0	1	0	no	no	yes	Yes	yes	Yes.	Yes.
SBIC-535	A person of asian ethnicity annotated the following statement as hateful: OH GOD IT LOOKS BAD THIS IS WHY I DONT FUCK WITH HIGHWAYS AND INTERSECTIONS. Is the given statement hateful?	0	0	0	0	0	0	no	yes	yes	Yes	no	Yes.	Hateful:
SBIC-536	A person of asian ethnicity annotated the following statement as hateful: Offensive Joke #2 What is the difference between a Jew and a pizza? The pizza doesn't scream when you put it in the oven. Is the given statement hateful?	1	1	1	1	1	1	no	no	yes	Yes	yes		Yes.
SBIC-537	A person of asian ethnicity annotated the following statement as hateful: Oh god. I am so stubborn. Just realized the only thing it took to push me off the fence in the real name/pseudonym debate was jason/wadhwa.. Is the given statement hateful?	0	0	0	0	0	0	no	no	no	No	no	The	The statement "
SBIC-538	A person of asian ethnicity annotated the following statement as hateful: Oh my God! Yea, that shooting at Haas last week was so crazy! I feel like I go to a ghetto school now!. Is the given statement hateful?	0	0	0	1	0	1	no	yes	yes	No	no	Yes.	Yes.
SBIC-539	A person of asian ethnicity annotated the following statement as hateful: Ok so all in all I loved Rogue One. They did some fanservicey shit i didn't care for but overall it was fantastic. Is the given statement hateful?	0	0	0	0	0	0	no	no	no	No	no	No.	No, the
SBIC-540	A person of asian ethnicity annotated the following statement as hateful: Old woman:: "Schools shouldn't offer free lunches to kids, since that means their parents just take advantage, and don't bother trying to find jobs to support their kids." Me:: "So you think we should allow kids to starve?!" Woman's husband:: "You see [myname], if you give them handouts, these people don't work. When I got …	0	0	0	0	0	0	no	yes	yes	Yes	yes	Yes.
SBIC-541	A person of asian ethnicity annotated the following statement as hateful: Only 1 in 700 people will get this... An extra 21st chromosome.. Is the given statement hateful?	0	0	1	0	0	0	no	yes	no	No	no	Yes.	Yes. No
SBIC-542	A person of asian ethnicity annotated the following statement as hateful: Only snowflake libtards believe anything that scumbag wrote in his crappy book!. Is the given statement hateful?	1	1	1	1	0	1	no	yes	yes	Yes	yes	Yes.	1. Yes
SBIC-543	A person of asian ethnicity annotated the following statement as hateful: Over 2000 people went to Vegas to meet Jason Aldeen 58 also got to meet Tom Petty.. Is the given statement hateful?	0	0	0	0	0	0	no	no	no	No	no	Yes.	Yes. No
SBIC-544	A person of asian ethnicity annotated the following statement as hateful: Owens vs. Jericho is one of the most intense, one of the most longest built matches on this #Wrestlemania card. It shouldn't be on 2nd.. Is the given statement hateful?	0	0	0	0	0	0	no	no	no	No	no	Yes.	Hateful:
SBIC-545	A person of asian ethnicity annotated the following statement as hateful: Parents: If YOU do not teach your children the rich, vibrant, and yes, sometimes controversial, history of your own locale, your region, your State, and your Country, they will be taught the Leftist version...sterilized, false, misleading, twisted, and full of intentional Social Justice overtones. Is the given statement hat…	0	0	1	0	0	0	no	yes	yes	No	no	Yes.	Explanation
SBIC-546	A person of asian ethnicity annotated the following statement as hateful: People are like chicken... They taste better deep fried.. Is the given statement hateful?	0	0	0	0	0	1	no	yes	yes	Yes	yes	Yes.	Yes. No
SBIC-547	A person of asian ethnicity annotated the following statement as hateful: People blaming ref &#128584;&#128584; haha Think he's been ok. No arguments. We're stupid. So dumb at times its untrue. Is the given statement hateful?	0	0	0	0	0	0	no	yes	yes	Yes	yes	Yes.	Yes. No
SBIC-548	A person of asian ethnicity annotated the following statement as hateful: People grandmothers want to get fucked up today cause I don't have time for their nasty ass attitude and rudeness &#128127;&#128548;&#128548;. Is the given statement hateful?	0	0	0	0	0	1	no	yes	yes	Yes	yes	Yes.	1. Yes
SBIC-549	A person of asian ethnicity annotated the following statement as hateful: People told me to stop inviting disabled people to my farm. Well, they're right. When I buried them, the vegetables didn't grow!. Is the given statement hateful?	1	1	1	1	1	1	no	yes	yes	Yes	yes	Yes.	Hateful.
SBIC-550	A person of asian ethnicity annotated the following statement as hateful: Please do not talk to me about OJ and parole as long as Casey Anthony walks this earth.. Is the given statement hateful?	0	0	0	0	0	0	no	yes	yes	No	no	Yes.	Yes.
SBIC-551	A person of asian ethnicity annotated the following statement as hateful: Please go to GoFundMe and put in dachshund needs help. My cream girl who is three yrs old has lost her feeling in the back.. Is the given statement hateful?	0	0	0	0	0	1	no	no	No	No	no	Yes.	Yes. No
SBIC-552	A person of asian ethnicity annotated the following statement as hateful: Please stop with all of the karma/negative comments. There's a bigger issue here than the person that was targeted.. Is the given statement hateful?	0	0	0	0	0	0	no	yes	yes	No	no	Yes.	1. Yes
SBIC-553	A person of asian ethnicity annotated the following statement as hateful: Pretty sure Richard Gilmore is Cracker von Patriarch.. Is the given statement hateful?	0	1	0	0	0	1	no	no	yes	No	no	Yes.	Yes.
SBIC-554	A person of asian ethnicity annotated the following statement as hateful: REMINDER: femoids would rather fuck ABUSIVE CHADS than an incel But don't forget that your personality is the problem.. Is the given statement hateful?	1	1	1	1	1	1	no	yes	yes	Yes	yes	Yes.	Yes, the
SBIC-555	A person of asian ethnicity annotated the following statement as hateful: RT @USER: Cue the liberal left's Uncle Tom attacks against Tim Scott in 4...3...2... #tcot #teaparty #GOP. Is the given statement hateful?	1	1	0	1	1	0	no	yes	yes	No	yes	Yes.	Explain your answer
SBIC-556	A person of asian ethnicity annotated the following statement as hateful: RT @USER: Ungrateful bitches ... URL. Is the given statement hateful?	0	0	0	0	0	1	no	yes	yes	Yes	yes	Yes.	A person of
SBIC-557	A person of asian ethnicity annotated the following statement as hateful: RT @USER: I'm tired of fat hoes calling themselves "thick". Bitch, yo fat ass can't even bend over and touch your toes withou .... Is the given statement hateful?	1	1	0	0	1	1	no	yes	yes	Yes	yes	Yes.	A person of
SBIC-558	A person of asian ethnicity annotated the following statement as hateful: RT @USER: @USER them klutzy bitches. Is the given statement hateful?	0	0	0	0	1	1	no	yes	yes	Yes	yes	Yes.	Yes.
SBIC-559	A person of asian ethnicity annotated the following statement as hateful: RT @USER: Any Nigga Or Dike Play Pussy Goin Get Fucked & That's On Luv. Is the given statement hateful?	1	1	1	1	0	1	no	yes	yes	Yes	yes	Yes.	Yes.
SBIC-560	A person of asian ethnicity annotated the following statement as hateful: RT @USER: im sick of bitches , bitching about other bitches &#128530;. Is the given statement hateful?	0	0	1	0	0	0	no	yes	yes	Yes	yes	Yes.	A. Yes
SBIC-561	A person of asian ethnicity annotated the following statement as hateful: RT @USER: hos will literally do ANYTHING to say they got a nigga dawg &#128514;&#128514;. Is the given statement hateful?	1	0	1	1	0	1	no	yes	yes	Yes	yes	Yes.	A person of
SBIC-562	A person of asian ethnicity annotated the following statement as hateful: RT @USER: In the car with my frands going FUCKING HYPERSPEED URL. Is the given statement hateful?	0	0	0	0	0	0	no	yes	yes	Yes	no	Yes.	The statement "
SBIC-563	A person of asian ethnicity annotated the following statement as hateful: RT @USER: I'm really fucking sick of watching the Republican Party be rewarded for flagrantly degrading our democracy.. Is the given statement hateful?	1	1	1	0	0	1	no	yes	yes	Yes	no	Yes.	A person of
SBIC-564	A person of asian ethnicity annotated the following statement as hateful: RT @USER: You should want a bad bitch like this URL. Is the given statement hateful?	0	0	0	0	0	1	no	yes	yes	Yes	yes	Yes.	Yes.
SBIC-565	A person of asian ethnicity annotated the following statement as hateful: Raping a stewardess at 30,000’... ... is just plane fucked.. Is the given statement hateful?	0	0	0	1	0	0	no	yes	yes	Yes	yes	Yes.	Yes.
SBIC-566	A person of asian ethnicity annotated the following statement as hateful: Rate Me In Happier Times at 18 (Pic). Is the given statement hateful?	0	0	0	0	0	0	no	no	no	No	no	Yes.	1. Yes
SBIC-567	A person of asian ethnicity annotated the following statement as hateful: Recent medical studies shows that obesity can cause lots of problems in pregnant women. I think there’s nothing to worry about it. If a woman is obese, she won’t be pregnant in the first place.. Is the given statement hateful?	1	1	0	1	1	1	no	no	no	No	no	Yes.	Yes.
SBIC-568	A person of asian ethnicity annotated the following statement as hateful: Reminder: it is at the very least Not any more difficult for an actual deformed person to find a partner than a conventional but non-attractive one. Is the given statement hateful?	1	0	1	1	0	1	no	yes	no	Yes	no	Yes.	The given statement
SBIC-569	A person of asian ethnicity annotated the following statement as hateful: Researchers found out the most important difference between humans and apes Apes lives in Africa. Is the given statement hateful?	1	1	1	1	1	1	no	no	no	No	no	Yes.	Yes. No
SBIC-570	A person of asian ethnicity annotated the following statement as hateful: Richmond police just made a Kissyface it Leo.. Is the given statement hateful?	0	0	0	0	0	0	no	no	yes	Yes	yes	Yes.	1. Yes
SBIC-571	A person of asian ethnicity annotated the following statement as hateful: Roy Moore: "Trannies are an abomination, repeal gay marriage, put God back into the government" Populist Working-Class Voter: "Okay, whatever nigga I just want a job". Is the given statement hateful?	1	1	1	1	1	1	no	yes	yes	Yes	yes		The given statement
SBIC-572	A person of asian ethnicity annotated the following statement as hateful: Safe havens for ILLEGAL immigrants is absolute nonsense. The left are protecting their voting base by harboring criminals. Citizens b damned. Is the given statement hateful?	1	0	1	0	1	1	no	yes	yes	Yes	yes	Yes.	Yes, the
SBIC-573	A person of asian ethnicity annotated the following statement as hateful: Secret Language During the holocaust the Jews had a secret language they used to speak... it went something like this, "OH MY GOD! I'M BURNING ALIVE". Is the given statement hateful?	1	1	1	1	1	1	no	no	no	No	yes	Yes.	Yes.
SBIC-574	A person of asian ethnicity annotated the following statement as hateful: See bitches ruin sports kobe don't play no damn football. Either you was looking to be mentioned for stupidity or ya momma a hoe. Or both.. Is the given statement hateful?	1	1	0	0	1	1	no	yes	yes	Yes	yes	Yes.	Hateful.
SBIC-575	A person of asian ethnicity annotated the following statement as hateful: Sept 11th 2001 The day al qaeda won the worst game of jenga ever.... Is the given statement hateful?	0	0	1	0	0	0	no	no	Yes	Yes	no	Yes.	Yes.
SBIC-576	A person of asian ethnicity annotated the following statement as hateful: Seriously, you're not going to pay for her?. Is the given statement hateful?	0	0	0	0	0	0	no	yes	no	No	no	Yes.	1. Yes
SBIC-577	A person of asian ethnicity annotated the following statement as hateful: She always wears such revealing clothing and flirts with all of these guys when we're out. It's just gross and dangerous. I'm not saying that a person deserves to be raped, but.... Is the given statement hateful?	1	0	1	0	1	1	no	yes	Yes	Yes	no	Yes.	Yes.
SBIC-578	A person of asian ethnicity annotated the following statement as hateful: Shocking This is a similiar incident to that of a Boy in England recently who was killed by Muslims for wearing an England Shirt .. Is the given statement hateful?	0	1	0	1	0	0	no	yes	yes	No	yes	Yes.	Yes.
SBIC-579	A person of asian ethnicity annotated the following statement as hateful: Shoutout to Subway Australia For fundraising for prostate cancer research in a country dominated by feminists.. Is the given statement hateful?	1	0	1	1	0	1	no	no	no	No	no	Yes.	No, the
SBIC-580	A person of asian ethnicity annotated the following statement as hateful: Shower Thought: If feminism is cancer, is that why ladies afflicted with it often lose their hair?. Is the given statement hateful?	1	1	1	1	1	1	no	no	no	Yes	yes	Yes.	Yes, the
SBIC-581	A person of asian ethnicity annotated the following statement as hateful: Sitting in the car is a date, watching movies is a date, laying in bed is a date. A date doesn't require your wallet only you're time&#128149;. Is the given statement hateful?	0	0	0	0	0	0	no	no	no	Yes	no	Yes.	Yes or No.
SBIC-582	A person of asian ethnicity annotated the following statement as hateful: Smack these hoes on they ass like we birthed these bitches. Is the given statement hateful?	1	1	0	1	0	1	no	yes	yes	Yes	yes	Yes.	A person of
SBIC-583	A person of asian ethnicity annotated the following statement as hateful: So I guess women are now being promoted to the level of the Jews:as long as one says something happened we have to believe it because not possible they would lie. Is the given statement hateful?	1	1	1	1	1	1	no	yes	yes	Yes	no	Yes.	No.
SBIC-584	A person of asian ethnicity annotated the following statement as hateful: So Toronto Police are investigating a `` racist '' `` alt-right '' poster found on a telephone poll near a school .. Is the given statement hateful?	0	0	0	0	0	0	no	yes	yes	No	yes	Yes.	Yes.
SBIC-585	A person of asian ethnicity annotated the following statement as hateful: So a girl recently got braces and sees her dad's wheelchair outside which is odd. She then asks her mom what's for dinner. Then mom says, "Wanna try mashed vegies?". Is the given statement hateful?	0	0	0	1	0	1	no	(II).	no	No	no	Yes.	Yes. No
SBIC-586	A person of asian ethnicity annotated the following statement as hateful: So my girlfriend refused to let me have sex with her but she didn't say anything when I put my dick inside her. Maybe because her mouth was taped.. Is the given statement hateful?	0	1	0	0	0	1	no	no	yes	No	no	Yes.	Yes.
SBIC-587	A person of asian ethnicity annotated the following statement as hateful: So, the Holocaust confuses me... So, the Holocaust confuses me... Like, I don't understand why anyone would want to survive it, because they would still be a jew afterwards.... Is the given statement hateful?	1	1	1	1	1	0	no	yes	yes	Yes	no	Yes.	Yes.
SBIC-588	A person of asian ethnicity annotated the following statement as hateful: So, water is actually heavier than liquefied dino-dong .. Is the given statement hateful?	0	0	0	0	0	0	no	no	no	Yes	no	Yes.	Yes. No
SBIC-589	A person of asian ethnicity annotated the following statement as hateful: Some guy on ig that doesn't even know me; asked me if I had a boyfriend because he liked me. lmao gtfoh boyyy. Is the given statement hateful?	0	0	0	0	0	0	no	yes	no	Yes	no	Yes.	Hateful:
SBIC-590	A person of asian ethnicity annotated the following statement as hateful: Some twoliners about Ethiopia Why did the Ethiopian mother span dental floss across the desert? So her children could play in the shade for once. How are barcodes actually made? By photographing Ethiopian families. And What do the numbers at the bottom of a barcode mean? How many Ethiopians are standing there. What's consid…	1	1	1	1	1	1	no	no	Yes	Yes	yes	Yes.	No, it
SBIC-591	A person of asian ethnicity annotated the following statement as hateful: Sometimes I think I enjoy gay sex... But that's just the French in me. Is the given statement hateful?	1	1	1	1	1	0	no	no	no	No	no	Yes.	No, the
SBIC-592	A person of asian ethnicity annotated the following statement as hateful: Sometimes I think of what I would do in a mass shooting event if I ran out of ammo.. Is the given statement hateful?	0	0	0	0	1	0	no	yes	no	No	no	Yes.	No, the
SBIC-593	A person of asian ethnicity annotated the following statement as hateful: Sometimes you have to forgive & forget. Forgive them for hurting and forget they even exist. #ALDUBKSGoesToUS. Is the given statement hateful?	0	0	0	0	0	0	no	no	no	No	no	Yes.	Hateful.
SBIC-594	A person of asian ethnicity annotated the following statement as hateful: Special ed classes are superior to the rest in, at least, one thing Chromosome average. Is the given statement hateful?	1	1	1	1	0	0	no	no	yes	Yes	no	Yes.	Yes. No
SBIC-595	A person of asian ethnicity annotated the following statement as hateful: Spreading a woman's legs is like spreading butter It can be done with a credit card but I prefer to use a knife. Is the given statement hateful?	1	1	1	1	1	1	no	yes	yes	Yes	yes	Yes.	Yes.
SBIC-596	A person of asian ethnicity annotated the following statement as hateful: Still out here smilin as much as I can wishin people good days and actually meaning it , little shit but it can make a difference.. Is the given statement hateful?	0	0	0	0	0	0	no	yes	no	No	no	Yes.	No, the
SBIC-597	A person of asian ethnicity annotated the following statement as hateful: Stop thinking they have to prove they self when they fucking with a community ass nigga Issa shooter. Is the given statement hateful?	1	1	1	1	1	1	no	yes	yes	Yes	yes	Yes.	Hateful.
SBIC-598	A person of asian ethnicity annotated the following statement as hateful: Stupid kids of stupid liberals and stupid bitchs who are of stupid liberals and stupid Governments that are of stupid issues stupid stupid stupid stupid people who get out of jail just so they can go right back for more of there dumb Politcal issues idk what els to say but im the target of there repeated issues that fail.. …	1	1	1	0	1	1	no	yes	Yes	Yes	yes	Yes.	Based on the
SBIC-599	A person of asian ethnicity annotated the following statement as hateful: Sure in the primaries and stuff... but the main elections are as simple as ABCD Anyone Besides Commie Democrats. Is the given statement hateful?	1	1	1	1	1	1	no	no	yes	Yes	yes	Yes.	Yes, the
SBIC-600	A person of asian ethnicity annotated the following statement as hateful: Swedish proposal for legal paternal surrender (LPS) gets major support in /r/news!. Is the given statement hateful?	0	0	0	0	0	0	no	no	no	No	no	Yes.	1. No
SBIC-601	A person of asian ethnicity annotated the following statement as hateful: TELL ME MORE @USER I'm not sexist but I don't think I actually find any female comedian funny. Is the given statement hateful?	0	1	0	0	0	0	no	no	no	No	no	Yes.	Yes. No
SBIC-602	A person of asian ethnicity annotated the following statement as hateful: TRP gets it - Anybody else noticing fat/ugly chicks with handsome guys?. Is the given statement hateful?	1	1	1	1	1	1	no	no	no	Yes	yes	Yes.	1. Yes
SBIC-603	A person of asian ethnicity annotated the following statement as hateful: Takes pride in his work and is extremely thorough Were not the words I wanted to see printed on my Sex Offenders file.. Is the given statement hateful?	0	0	0	0	0	1	no	no	no	No	no	Yes.	Yes. No
SBIC-604	A person of asian ethnicity annotated the following statement as hateful: Tanzania Pardoned Two Child Rapists But Called For Arrest Of Pregnant Teens News of the pedophile rapists' release emerged simultaneously as another government official called for pregnant pupils to be taken into custody.. Is the given statement hateful?	0	0	0	0	0	0	no	no	yes	No	yes	Yes.	No, the
SBIC-605	A person of asian ethnicity annotated the following statement as hateful: Technically legal If you penetrate before she says no its technically not rape. Is the given statement hateful?	1	1	0	0	1	1	no	no	no	No	yes	Yes.	The given statement
SBIC-606	A person of asian ethnicity annotated the following statement as hateful: Teenage boys wear skirts to school to protest against 'no shorts' policy • r/news. Is the given statement hateful?	0	0	0	0	0	0	no	yes	no	No	no	Yes.	1. No
SBIC-607	A person of asian ethnicity annotated the following statement as hateful: Thank you my friend for posting on our section .... Is the given statement hateful?	0	0	0	0	0	0	no	no	no	No	no	Yes.	Yes. No
SBIC-608	A person of asian ethnicity annotated the following statement as hateful: Thanks for the #RT! @USER @USER @USER @USER @USER @USER Have a great week!. Is the given statement hateful?	0	0	0	0	0	0	no	no	no	No	no	Yes.	A. No
SBIC-609	A person of asian ethnicity annotated the following statement as hateful: Thanks for the advice i 'll keep that on mind .. Is the given statement hateful?	0	0	0	0	0	0	no	no	no	No	no	Yes.	A. Yes
SBIC-610	A person of asian ethnicity annotated the following statement as hateful: That was two girls!. Is the given statement hateful?	0	0	0	0	0	0	no	yes	no	No	no	Yes.	1. Yes
SBIC-611	A person of asian ethnicity annotated the following statement as hateful: The Classic Mini Has Been Remastered With New Engines And Tech via @USER URL. Is the given statement hateful?	0	0	0	0	0	0	no	no	no	No	no	No.	No, the
SBIC-612	A person of asian ethnicity annotated the following statement as hateful: The Obama Era is the largest collection of treasonous acts upon this country, since it's founding.. Is the given statement hateful?	0	0	0	0	0	0	no	yes	yes	Yes	yes	Yes.	Yes.
SBIC-613	A person of asian ethnicity annotated the following statement as hateful: The Twin Towers were full of Nazis. They did Nazi the planes coming.. Is the given statement hateful?	0	0	1	0	0	1	no	yes	yes	Yes	yes	Yes.	Yes. No
SBIC-614	A person of asian ethnicity annotated the following statement as hateful: The body of Mollie, the missing Iowa student, has been found. She was chopped Tibbetts.. Is the given statement hateful?	0	0	0	0	0	1	no	no	yes	No	no	Yes.	Yes.
SBIC-615	A person of asian ethnicity annotated the following statement as hateful: The entire Series of Step By Step is on Hulu.. Is the given statement hateful?	0	0	0	0	0	0	no	no	no	No	no	Yes.	Yes. No
SBIC-616	A person of asian ethnicity annotated the following statement as hateful: The fat acceptance movement is the only movement without movement. Is the given statement hateful?	1	1	1	1	1	1	no	yes	yes	Yes	no	Yes.	1. Yes
SBIC-617	A person of asian ethnicity annotated the following statement as hateful: The first thing I do When I see a new haiku Is count syllables. Is the given statement hateful?	0	0	0	0	0	0	no	no	no	No	no		No, it
SBIC-618	A person of asian ethnicity annotated the following statement as hateful: The funny thing about conversing with kikes is once you've mastered seeing through their deceptive jewspeak you quickly realize that whole high iq thing is largely a myth. Is the given statement hateful?	1	1	1	1	1	1	no	yes	yes	Yes	yes	Yes.	A person of
SBIC-619	A person of asian ethnicity annotated the following statement as hateful: The kikes probably put the Leftist up to it , to make it seem like they do n't have total control of everyone .. Is the given statement hateful?	1	1	1	1	0	0	no	yes	yes	Yes	yes	Yes.	Yes.
SBIC-620	A person of asian ethnicity annotated the following statement as hateful: The nine-year-olds at my younger cousin's birthday party think they can beat me in laser tag because they have experience in Fortnite Little did they know I have experience in American highschools.. Is the given statement hateful?	0	0	0	0	0	1	no	no	no	No	no	Yes.	Yes. No
SBIC-621	A person of asian ethnicity annotated the following statement as hateful: The only people in Obama's administration that didn't break the law were his children.. Is the given statement hateful?	0	0	0	0	0	0	no	no	yes	Yes	no	Yes.	Yes.
SBIC-622	A person of asian ethnicity annotated the following statement as hateful: The opposite of being far right is to be way wrong.. Is the given statement hateful?	0	0	1	0	0	1	no	yes	no	No	no	Yes.	No, the
SBIC-623	A person of asian ethnicity annotated the following statement as hateful: The red scum will never wake up , ignorant lefties fight for `` their class '' when their making a mockery of their culture and heritage . commie scum ... Is the given statement hateful?	1	1	1	1	1	1	no	yes	Yes	Yes	yes	Yes.	Yes.
SBIC-624	A person of asian ethnicity annotated the following statement as hateful: The slogan on the entrance of Auschwitz was the well-known "work sets you free". But what was the slogan at the exit? "Hot surface. Do not touch.". Is the given statement hateful?	1	0	1	1	0	1	no	yes	yes	No	no	Yes.	Yes. No
SBIC-625	A person of asian ethnicity annotated the following statement as hateful: The therapy ads in the banner are, unsurprisingly, a scam.. Is the given statement hateful?	0	0	0	0	0	0	no	yes	no	No	no	Yes.	1. Yes
SBIC-626	A person of asian ethnicity annotated the following statement as hateful: The younger ones will say they are survivors because they were sperm in the men and eggs in the women .. Is the given statement hateful?	0	0	0	0	0	0	no	yes	no	Yes	no	Yes.	Yes.
SBIC-627	A person of asian ethnicity annotated the following statement as hateful: There is a special place for snowflake libtards it has many names, mental ward, mental institution, insane asylum, funny farm!. Is the given statement hateful?	1	1	1	1	1	1	no	yes	yes	Yes	yes	Yes.	1. Yes
SBIC-628	A person of asian ethnicity annotated the following statement as hateful: There is no doubt in my mind that the #LegacyMedia and academia are intentionally indoctrinating the population with "White Guilt" in every Western nation in a subversive attempt to usher in Communism.. Is the given statement hateful?	1	1	0	1	0	1	no	yes	yes	No	yes	Yes.	Yes.
SBIC-629	A person of asian ethnicity annotated the following statement as hateful: There is no thread on r/thebluepill regarding RippedRichAndIncel's atomic black pill 🤔🤔🤔🤔🤔🤔🤔🤔🤔🤔. Is the given statement hateful?	0	0	0	0	0	0	no	no	no	No	no		Explanation
SBIC-630	A person of asian ethnicity annotated the following statement as hateful: There is one language I don't understand and that language is.....Snowflake libtard!. Is the given statement hateful?	1	1	0	1	1	1	no	yes	yes	Yes	yes	Yes.	Hateful.
SBIC-631	A person of asian ethnicity annotated the following statement as hateful: There should be a modernized version of "The Boy Who Cried Wolf" called "The Girl Who Cried Rape". Is the given statement hateful?	1	1	1	1	1	1	no	no	yes	No	no	Yes.	Yes.
SBIC-632	A person of asian ethnicity annotated the following statement as hateful: These bitches boringgggg. Is the given statement hateful?	0	0	0	0	0	0	no	yes	yes	Yes	yes	Yes.	1. Yes
SBIC-633	A person of asian ethnicity annotated the following statement as hateful: These bitches so broke instead of go get it they quick to go ask for somethin. Is the given statement hateful?	0	0	0	0	1	1	no	yes	yes	Yes	yes	Yes.	1. Yes
SBIC-634	A person of asian ethnicity annotated the following statement as hateful: These fat hoes think they slick posting neck up pics and shit. Is the given statement hateful?	1	1	1	0	1	1	no	yes	yes	Yes	yes	Yes.	Yes.
SBIC-635	A person of asian ethnicity annotated the following statement as hateful: These guys took offence earlier because I said "midget" instead of "little person". I was forced to restart my story. I said, "OK, so I was fucking this dead little person...". Is the given statement hateful?	1	1	1	1	1	1	no	yes	yes	Yes	yes	Yes.	Yes.
SBIC-636	A person of asian ethnicity annotated the following statement as hateful: They do this with criminals who ought to be in jail , they put tracking bracelets on them and the smart ones cut them off before they rape and rob , the dumb ones do n't care and just leave them on .. Is the given statement hateful?	1	1	1	0	0	1	no	yes	yes	No	no	Yes.	Yes. No
SBIC-637	A person of asian ethnicity annotated the following statement as hateful: Things Chad doesn't have to deal with or worry about Getting cheated on Getting laid Not getting any matches on Tinder Having to message first Having to be confident Having to ask any girl out Getting attention or validation Getting invited to parties Care to add more?. Is the given statement hateful?	0	0	0	1	0	0	no	no	no	No	no		No, it
SBIC-638	A person of asian ethnicity annotated the following statement as hateful: This Fool is Sick on @USER and that's saying something for this Show where Pyschos are the Norm & not the Exception #CrazyIsDaNorm. Is the given statement hateful?	0	0	0	1	0	0	no	yes	yes	No	no	Yes.	Hateful.
SBIC-639	A person of asian ethnicity annotated the following statement as hateful: This is fucking retarded. Is the given statement hateful?	0	0	0	0	1	0	no	yes	yes	Yes	yes	Yes.	A. Yes
SBIC-640	A person of asian ethnicity annotated the following statement as hateful: This is the 4th act of Leftist terrorism on Trump's supporters since his election -Tennessee Church shooting -Vegas Massacre -Republican Senate baseball game shooting -Texas Church shooting RICO Antifa, Soros, BLM. Is the given statement hateful?	1	1	1	1	0	0	no	yes	yes	Yes	no	Yes.	Hate.
SBIC-641	A person of asian ethnicity annotated the following statement as hateful: This is what innovation looks like. Horrible organization. Proprietary standards like AZW that have a substantial lack in metadata fields.. Is the given statement hateful?	0	0	0	0	0	0	no	yes	yes	Yes	no	Yes.	1. Yes
SBIC-642	A person of asian ethnicity annotated the following statement as hateful: This is why libtards and Jews call us white supremacists and get away with it .. Is the given statement hateful?	1	1	1	1	1	1	no	yes	yes	Yes	yes	Yes.	Yes.
SBIC-643	A person of asian ethnicity annotated the following statement as hateful: This mf made me cum not 1,2,3, but 4 times tonight. I made him bust 3. Nigga had stamina 4 sho damn ..... Is the given statement hateful?	0	0	0	0	0	1	no	yes	yes	Yes	no	Yes.	Yes.
SBIC-644	A person of asian ethnicity annotated the following statement as hateful: This random girl came up to me last night & said she was coming home w me. My heart started beating so fast y'all I was SCARED & AFRAID.. Is the given statement hateful?	0	0	0	0	0	0	no	yes	no	No	no	Yes.	Yes. No
SBIC-645	A person of asian ethnicity annotated the following statement as hateful: This truth applies to other subjects we discuss on this board .. Is the given statement hateful?	0	0	0	0	0	0	no	no	no	No	no	Yes.	Yes. No
SBIC-646	A person of asian ethnicity annotated the following statement as hateful: This why I am the way I am bc mfs is out of this world retarded &#128514;&#128514;. Is the given statement hateful?	0	0	0	0	0	0	no	yes	yes	Yes	yes	Yes.	1. Yes
SBIC-647	A person of asian ethnicity annotated the following statement as hateful: To me anal is like a boxing match It's only fun if you knock her out and go till things get bloody. Is the given statement hateful?	0	0	0	1	0	1	no	yes	yes	Yes	yes	Yes.	Yes.
SBIC-648	A person of asian ethnicity annotated the following statement as hateful: To the women marching across the US today Have as many abortions as you’d like Boycott sperm Get sterilized Boycott the patriarchy Kill yourselves in protest. Is the given statement hateful?	1	1	1	1	1	1	no	yes	yes	Yes	yes		Yes.
SBIC-649	A person of asian ethnicity annotated the following statement as hateful: Today I found out what the world inferior really meant I was nothing compared to the highly nt group i was eating lunch with, absolutely nothing.. Is the given statement hateful?	0	0	0	0	0	0	no	yes	yes	Yes	yes	Yes.	Yes, the
SBIC-650	A person of asian ethnicity annotated the following statement as hateful: Today I got a joke email about adopting a fast-food delivery robot and that was more believable than the Trump presidency #aprilfoolsday. Is the given statement hateful?	0	0	0	0	0	0	no	no	no	No	no	Yes.	No, the
SBIC-651	A person of asian ethnicity annotated the following statement as hateful: Today's read is ANOTHER book published today - @USER Reservoir 13 - couple of chapters in and I want to just sit all day+ read. Is the given statement hateful?	0	0	0	0	0	0	no	no	no	No	no	Yes.	No.
SBIC-652	A person of asian ethnicity annotated the following statement as hateful: Totally different if I was prepping a meal for him. But y'all on something else if imma reach across he table to cut his chicken.... Is the given statement hateful?	0	0	0	0	0	0	no	yes	no	No	no	Yes.	1. Yes
SBIC-653	A person of asian ethnicity annotated the following statement as hateful: Trade free follows 200x200 or less I don't go first liars get blocked & reported team up 30x30 tweet me &#128123;. Is the given statement hateful?	0	0	0	0	0	0	no	no	yes	No	no	Yes.	1. No
SBIC-654	A person of asian ethnicity annotated the following statement as hateful: Travelling with #flybe we will track your flight so we will always be at the airport in time awaiting your arrival @USER. Is the given statement hateful?	0	0	0	0	0	0	no	no	no	No	no	Yes.	The given statement
SBIC-655	A person of asian ethnicity annotated the following statement as hateful: Truly sad that we 've decreased education standards to make minority students more successful .. Is the given statement hateful?	1	0	1	1	1	1	no	yes	no	No	no	Yes.	Yes.
SBIC-656	A person of asian ethnicity annotated the following statement as hateful: Trump and hitler are similar but Atleast hitler knew when to kill himself. Is the given statement hateful?	1	0	1	1	0	1	no	no	yes	Yes	yes	Yes.	Yes.
SBIC-657	A person of asian ethnicity annotated the following statement as hateful: TwoX agrees that the gender pay gap doesn't exist!. Is the given statement hateful?	0	0	1	0	1	0	no	no	no	No	no	No.	1. True
SBIC-658	A person of asian ethnicity annotated the following statement as hateful: Ugh, I can't. @USER Nothing quite as degrading as a man using a feather duster. #GenderRoleShock #NotSexist #JustManly. Is the given statement hateful?	0	0	1	0	0	1	no	yes	yes	Yes	yes	Yes.	1. Yes
SBIC-659	A person of asian ethnicity annotated the following statement as hateful: Ugly but got the balls to talk not like your pussy ass #mcm. Is the given statement hateful?	0	0	0	0	1	1	no	yes	yes	Yes	yes	Yes.	Hateful.
SBIC-660	A person of asian ethnicity annotated the following statement as hateful: Update: apparently my whole family ate dinner without me cos they thought i ate :)))) i was starving waiting to eat together with yall :)))). Is the given statement hateful?	0	0	0	0	0	0	no	(II)	no	No	no	Yes.	No, the
SBIC-661	A person of asian ethnicity annotated the following statement as hateful: User talks about his perspective on being a young parent. Is the given statement hateful?	0	0	0	0	0	0	no	no	no	No	no	Yes.	Yes. No
SBIC-662	A person of asian ethnicity annotated the following statement as hateful: Vince once again fucked over Undertaker over a blind push. 'Taker is over now, and so is me as a @USER fan. #VinceScrewedTaker. Is the given statement hateful?	0	0	0	0	0	0	no	yes	yes	Yes	no	Yes.	Yes.
SBIC-663	A person of asian ethnicity annotated the following statement as hateful: WOW TOP SHELF HUMOR @USER What's the point in having a cleaning lady when I have a mom and a sister? #NotSexist. Is the given statement hateful?	1	1	1	1	1	1	no	yes	yes	No	no	Yes.	1. No
SBIC-664	A person of asian ethnicity annotated the following statement as hateful: Wait, can I catch your Asperger's?. Is the given statement hateful?	0	0	0	0	0	1	no	yes	no	Yes	no	Yes.	1. Yes
SBIC-665	A person of asian ethnicity annotated the following statement as hateful: Wanna hear the biggest lie? "Men and women deserve equal rights". Is the given statement hateful?	1	1	1	1	1	0	no	yes	no	Yes	no	Yes.	The given statement
SBIC-666	A person of asian ethnicity annotated the following statement as hateful: Wasn't that when Steve and Bean got their heads cracked opened ?. Is the given statement hateful?	0	0	0	0	0	1	no	yes	no	No	no	Yes.	Yes.
SBIC-667	A person of asian ethnicity annotated the following statement as hateful: We are all entitle to our feelings toward any politicians (R or D)...just don't @ me, unless I ask for your feelings.. Is the given statement hateful?	0	0	0	0	0	0	no	yes	no	No	no	No.	Hateful:
SBIC-668	A person of asian ethnicity annotated the following statement as hateful: We don't keep eating utensils in the car. That's what FAT FAT FAT people do.. Is the given statement hateful?	1	1	1	1	1	1	no	yes	yes	Yes	yes	Yes.	Yes.
SBIC-669	A person of asian ethnicity annotated the following statement as hateful: We have a saying in South Africa : As die kop dom is moet die lyf sukkel .. Is the given statement hateful?	0	0	0	0	0	1	no	no	no	No	yes	Yes.	Yes. No
SBIC-670	A person of asian ethnicity annotated the following statement as hateful: We have enslaved entire species of animals because we think that they are cute... but I kidnap one cute schoolgirl and the nation goes mad!. Is the given statement hateful?	0	0	0	1	0	1	no	yes	yes	Yes	no	Yes.	Yes.
SBIC-671	A person of asian ethnicity annotated the following statement as hateful: We must never forget what happened during the Holocaust. Three million survived.. Is the given statement hateful?	1	1	1	1	1	0	no	no	no	No	no	No.	No, the
SBIC-672	A person of asian ethnicity annotated the following statement as hateful: We were just kids when we fell in love Not knowing what it was I will not give you up this time.<3 — thinking about old memories. Is the given statement hateful?	0	0	0	0	0	0	no	no	no	No	no	No.	No, the
SBIC-673	A person of asian ethnicity annotated the following statement as hateful: Well, if the Ambassadors won't hang Trump's picture maybe we should just hang the Ambassadors.. Is the given statement hateful?	1	0	1	1	1	1	no	no	yes	Yes	yes	Yes.	Yes.
SBIC-674	A person of asian ethnicity annotated the following statement as hateful: What Do A Woman And A Bar Have In Common? Liq-Her In The Front, Poke Her In The Back.. Is the given statement hateful?	1	0	1	1	1	1	no	no	yes	Yes	yes	Yes.	Yes.
SBIC-675	A person of asian ethnicity annotated the following statement as hateful: What a fucking goal! Zaha to Puncheon to Townsend to Benteke Goal!!! &#128293;&#128293;&#128293;&#128293;. Is the given statement hateful?	0	0	0	0	0	0	no	yes	yes	No	no	Yes.	Explanation
SBIC-676	A person of asian ethnicity annotated the following statement as hateful: What a load of crap.Water are ye people for real Ireland is been taken over by non Irish and this rubbish .. Is the given statement hateful?	1	1	1	1	1	1	no	yes	yes	Yes	yes	Yes.	Yes.
SBIC-677	A person of asian ethnicity annotated the following statement as hateful: What a nice feeling to be in love with God. No pain. No heartache. No disappointment. Just blessings and non stop joy.. Is the given statement hateful?	0	0	0	0	0	0	no	no	no	No	no	Yes.	Yes. No
SBIC-678	A person of asian ethnicity annotated the following statement as hateful: What an excellent book, reading it now and seeing clearly the cycles that repeat.. Is the given statement hateful?	0	0	0	0	0	0	no	no	no	No	no	Yes.	1. No
SBIC-679	A person of asian ethnicity annotated the following statement as hateful: What are the advantages of being blacc? You can attend a funeral naked.... Is the given statement hateful?	1	1	1	1	1	1	no	no	yes	Yes	yes	Yes.	Yes.
SBIC-680	A person of asian ethnicity annotated the following statement as hateful: What did Hitler tell the jews when they can't solve a riddle. take a gas. Is the given statement hateful?	1	1	1	1	1	1	no	yes	yes	Yes	yes	Yes.	Yes.
SBIC-681	A person of asian ethnicity annotated the following statement as hateful: What did the Catholic priest say when asked if his profession hinders his chances of getting laid? "Ahh nah it's all child's play". Is the given statement hateful?	1	1	1	1	0	1	no	yes	no	No	no	Yes.	Yes.
SBIC-682	A person of asian ethnicity annotated the following statement as hateful: What did the homeless man get for Christmas? Hypothermia. Is the given statement hateful?	1	0	1	1	0	1	no	yes	yes	Yes	no	Yes.	A person of
SBIC-683	A person of asian ethnicity annotated the following statement as hateful: What did the jew say to the other jew? Jew: Is something burning?. Is the given statement hateful?	1	1	1	1	0	1	no	yes	yes	No	yes	Yes.	A person of
SBIC-684	A person of asian ethnicity annotated the following statement as hateful: What did the kid who stole the gun from the school shooter say? My Turn!. Is the given statement hateful?	0	0	0	0	1	1	no	yes	no	No	no	Yes.	Yes.
SBIC-685	A person of asian ethnicity annotated the following statement as hateful: What did the kid with down syndrome get in his test? 47/46. Is the given statement hateful?	1	1	1	1	1	1	no	no	no	No	no	Yes.	Yes.
SBIC-686	A person of asian ethnicity annotated the following statement as hateful: What did the little nerd kid say to his bullies after class? Nothing they're all dead. Is the given statement hateful?	0	0	0	0	0	0	no	yes	yes	No	yes	Yes.	Yes.
SBIC-687	A person of asian ethnicity annotated the following statement as hateful: What did the nigger get on his SAT's? Watermelon Juice -Kevin Barnett. Is the given statement hateful?	1	1	1	1	1	1	no	yes	yes	Yes	yes	Yes.	Yes.
SBIC-688	A person of asian ethnicity annotated the following statement as hateful: What do Jews and cars have in common They are full of gas. Is the given statement hateful?	1	1	1	1	1	1	no	yes	yes	Yes	yes	Yes.	Yes.
SBIC-689	A person of asian ethnicity annotated the following statement as hateful: What do brick sidewalks and fat women have in common They both get laid by mexicans. Is the given statement hateful?	1	1	1	1	1	1	no	yes	yes	Yes	yes	Yes.	Yes.
SBIC-690	A person of asian ethnicity annotated the following statement as hateful: What do jews and meat have in common? They're both better cooked. Is the given statement hateful?	1	1	1	1	1	1	no	no	yes	Yes	yes	Yes.	The statement is
SBIC-691	A person of asian ethnicity annotated the following statement as hateful: What do my wife and the water temple have in common? I can spend hours beating them.. Is the given statement hateful?	1	1	1	1	1	1	no	no	yes	Yes	yes	Yes.	Yes. No
SBIC-692	A person of asian ethnicity annotated the following statement as hateful: What do retards eat on toast? BuDURRRRRRR. Is the given statement hateful?	1	1	1	1	0	1	no	yes	yes	Yes	yes	Yes.	Yes.
SBIC-693	A person of asian ethnicity annotated the following statement as hateful: What do u do after raping Helen Keller? Break her fingers so she can't tell. Is the given statement hateful?	1	1	1	1	1	1	no	yes	yes	Yes	yes	Yes.	Yes.
SBIC-694	A person of asian ethnicity annotated the following statement as hateful: What do you call a Jew with autism? Auschwistic. Is the given statement hateful?	1	1	1	1	1	1	no	yes	yes	Yes	yes	Yes.	Yes.
SBIC-695	A person of asian ethnicity annotated the following statement as hateful: What do you call a black man left hanging? a lynching victim. Is the given statement hateful?	1	1	1	1	1	1	no	yes	yes	Yes	yes	Yes.	Yes.
SBIC-696	A person of asian ethnicity annotated the following statement as hateful: What do you call a black midget in Ireland. A leprecoon.. Is the given statement hateful?	1	1	1	1	1	1	no	yes	yes	Yes	yes	Yes.	Yes.
SBIC-697	A person of asian ethnicity annotated the following statement as hateful: What do you call a black spider? No daddy long legs. Is the given statement hateful?	1	1	0	0	1	1	no	yes	yes	No	no	Yes.	The given statement
SBIC-698	A person of asian ethnicity annotated the following statement as hateful: What do you call a charred hot dog? An Anne Frank. Is the given statement hateful?	1	1	1	0	0	1	no	yes	yes	No	no	Yes.	The statement "
SBIC-699	A person of asian ethnicity annotated the following statement as hateful: What do you call a kid with Down's Syndrome after he smokes 2 blunts? A baked potato. Is the given statement hateful?	1	1	1	1	1	1	no	yes	yes	Yes	yes	Yes.	Yes.
SBIC-700	A person of asian ethnicity annotated the following statement as hateful: What do you call a kid with no arms or legs? Names.. Is the given statement hateful?	1	1	0	1	1	0	no	yes	yes	No	yes	Yes.	The statement "What
SBIC-701	A person of asian ethnicity annotated the following statement as hateful: What do you call a little boy with no arms and no legs? You call him names.. Is the given statement hateful?	1	1	1	1	0	1	no	yes	yes	Yes	yes	Yes.	The given statement
SBIC-702	A person of asian ethnicity annotated the following statement as hateful: What do you call a muslim girl in a birthday party? Drone target.. Is the given statement hateful?	1	1	1	1	1	1	no	yes	yes	Yes	yes	Yes.	Yes.
SBIC-703	A person of asian ethnicity annotated the following statement as hateful: What do you call a paralysed black man ? Useless. Is the given statement hateful?	1	1	1	1	1	1	no	yes	yes	Yes	yes	Yes.	Yes.
SBIC-704	A person of asian ethnicity annotated the following statement as hateful: What do you call a person with no arms or legs in the ocean? Bob. Is the given statement hateful?	0	0	0	0	0	0	no	yes	yes	Yes	yes		The given statement
SBIC-705	A person of asian ethnicity annotated the following statement as hateful: What do you call a picture of smoke? A Jewish family photo. Is the given statement hateful?	1	1	1	1	1	1	no	yes	yes	Yes	yes	Yes.	Yes.
SBIC-706	A person of asian ethnicity annotated the following statement as hateful: What do you call a special jew? Auschwistic. Is the given statement hateful?	1	1	1	1	1	1	no	yes	yes	Yes	yes	Yes.	Yes.
SBIC-707	A person of asian ethnicity annotated the following statement as hateful: What do you call a white girl that can run faster than her brothers? The redneck virgin. Is the given statement hateful?	1	1	1	1	0	1	no	yes	yes	Yes	yes	Yes.	Yes.
SBIC-708	A person of asian ethnicity annotated the following statement as hateful: What do you call a white girl who’s faster than her brothers? A redneck virgin. Is the given statement hateful?	1	1	1	1	1	1	no	yes	yes	Yes	yes	Yes.	Yes.
SBIC-709	A person of asian ethnicity annotated the following statement as hateful: What do you call an Hispanic group that targets black people? The Que, Que, Que. Is the given statement hateful?	1	1	1	1	1	1	yes	yes	yes	Yes	yes	Yes.	Yes.
SBIC-710	A person of asian ethnicity annotated the following statement as hateful: What do you call an adopted fat person thats retarded? Hammy downs.. Is the given statement hateful?	1	1	1	1	1	1	no	yes	yes	Yes	yes	Yes.	Yes.
SBIC-711	A person of asian ethnicity annotated the following statement as hateful: What do you call an autistic child after they’ve been hit by a car? Mashed potatoes. Is the given statement hateful?	1	1	1	1	1	1	no	yes	yes	Yes	yes	Yes.	The statement is
SBIC-712	A person of asian ethnicity annotated the following statement as hateful: What do you call an autistic gymnast? A leo-Tard. Is the given statement hateful?	1	1	1	1	1	1	no	yes	yes	Yes	yes	Yes.	Explain your answer
SBIC-713	A person of asian ethnicity annotated the following statement as hateful: What do you call an orgy of retards? Veggie salad.. Is the given statement hateful?	1	1	1	1	1	1	no	yes	yes	Yes	yes	Yes.	Yes.
SBIC-714	A person of asian ethnicity annotated the following statement as hateful: What do you call it when you are beating up a mentally insane person? Busting A Nut. Is the given statement hateful?	1	1	1	1	1	0	no	yes	yes	Yes	yes	Yes.	Yes.
SBIC-715	A person of asian ethnicity annotated the following statement as hateful: What do you call it when you kill 3 old people? Geri-hat trick. Is the given statement hateful?	1	1	0	1	0	1	no	yes	yes	Yes	yes	Yes.	Yes.
SBIC-716	A person of asian ethnicity annotated the following statement as hateful: What do you call it when you throw a Molotov cocktail into the special-ed room? Hot potato. Is the given statement hateful?	1	1	1	1	0	1	no	yes	yes	Yes	yes	Yes.	Yes.
SBIC-717	A person of asian ethnicity annotated the following statement as hateful: What do you call vegetables that are having a threesome A triple cripple. Is the given statement hateful?	1	1	1	1	1	1	no	yes	yes	Yes	no	Yes.	Yes.
SBIC-718	A person of asian ethnicity annotated the following statement as hateful: What do you do when you are done fucking the tightest pussy? You put it back in the womb.. Is the given statement hateful?	0	0	0	0	1	1	no	yes	yes	Yes	yes	Yes.	Yes.
SBIC-719	A person of asian ethnicity annotated the following statement as hateful: What do you get by dragging 50 dead babies through a field? A boner. Is the given statement hateful?	0	0	0	0	0	1	no	yes	yes	Yes	yes	Yes.	Yes.
SBIC-720	A person of asian ethnicity annotated the following statement as hateful: What do you get when an Autistic child gets in a car crash? Mashed potatoes.. Is the given statement hateful?	1	1	1	1	1	1	no	yes	no	Yes	yes	Yes.	Yes.
SBIC-721	A person of asian ethnicity annotated the following statement as hateful: What do you get when someone bullies a really autistic kid? 20 casualties.. Is the given statement hateful?	1	1	1	1	1	1	no	yes	yes	No	yes	Yes.	Yes.
SBIC-722	A person of asian ethnicity annotated the following statement as hateful: What do you get when you mix human DNA and goat DNA? Kicked out of the petting zoo.. Is the given statement hateful?	0	0	0	0	0	0	no	yes	yes	No	no	Yes.	Yes.
SBIC-723	A person of asian ethnicity annotated the following statement as hateful: What does a homeless man get every day that a normal person doesn't? Hungry.. Is the given statement hateful?	0	0	0	0	0	1	no	yes	yes	Yes	no	Yes.	Yes. No
SBIC-724	A person of asian ethnicity annotated the following statement as hateful: What does a redneck girl say when she meets her first lover? Hi dad!. Is the given statement hateful?	1	1	0	1	1	1	no	Yes	yes	Yes	yes	Yes.	Yes.
SBIC-725	A person of asian ethnicity annotated the following statement as hateful: What does life and a box of chocolates have in common? It doesn't last as long if you're fat.. Is the given statement hateful?	1	1	1	1	0	0	no	no	no	No	yes	Yes.	Yes. No
SBIC-726	A person of asian ethnicity annotated the following statement as hateful: What does the crippled, mute, deaf and blind Hannah get for Christmas? Cancer. Is the given statement hateful?	1	1	1	0	1	1	no	yes	yes	No	no	Yes.	Hateful.
SBIC-727	A person of asian ethnicity annotated the following statement as hateful: What does the president say to get rid of all the black people in his country? Nothing. He just opens the cage.. Is the given statement hateful?	1	1	1	1	1	1	no	yes	yes	Yes	yes	Yes.	Yes.
SBIC-728	A person of asian ethnicity annotated the following statement as hateful: What falls harder, rain or snow? World Trade Center.. Is the given statement hateful?	0	0	0	0	1	1	no	yes	no	No	no	Yes.	The given statement is
SBIC-729	A person of asian ethnicity annotated the following statement as hateful: What happens when you grill up a retard You get assburgers. Is the given statement hateful?	1	1	1	1	1	1	no	yes	yes	Yes	yes	Yes.	Yes.
SBIC-730	A person of asian ethnicity annotated the following statement as hateful: What is another way to describe a school shooting? Population control. Is the given statement hateful?	1	0	0	1	1	1	no	yes	yes	Yes	yes	Yes.	Yes.
SBIC-731	A person of asian ethnicity annotated the following statement as hateful: What is black and sits on the top of the stairs A cripple in a house fire. Is the given statement hateful?	1	1	1	1	1	1	no	yes	yes	Yes	yes	Yes.	The given statement
SBIC-732	A person of asian ethnicity annotated the following statement as hateful: What is that in the background, a giant lawn chair?. Is the given statement hateful?	0	0	0	0	0	0	no	yes	no	No	no	Yes.	1. No
SBIC-733	A person of asian ethnicity annotated the following statement as hateful: What is the difference between a crucifixion and a circumcision? In a crucifixion, they throw out the whole Jew.. Is the given statement hateful?	1	1	1	1	1	1	no	yes	yes	No	yes	Yes.	Yes.
SBIC-734	A person of asian ethnicity annotated the following statement as hateful: What is worse than Hitler,Stalin,Mao Nd PolPot put together That stupid Chadbot. Is the given statement hateful?	0	0	1	0	0	1	no	yes	yes	Yes	yes	Yes.	Yes.
SBIC-735	A person of asian ethnicity annotated the following statement as hateful: What is worse than finding a worm in your apple? AIDS. Is the given statement hateful?	0	0	0	0	0	0	no	yes	no	No	no	Yes.	Yes.
SBIC-736	A person of asian ethnicity annotated the following statement as hateful: What martial arts type was hitler scared of? jewjitsu. Is the given statement hateful?	1	1	1	1	1	1	no	yes	yes	Yes	yes	Yes.	Yes.
SBIC-737	A person of asian ethnicity annotated the following statement as hateful: What never eats but still is alive? The children of africa. Is the given statement hateful?	1	1	1	0	1	1	no	yes	yes	Yes	yes	Yes.	The given statement
SBIC-738	A person of asian ethnicity annotated the following statement as hateful: What part of a vegetable cant you eat? The wheelchair. Is the given statement hateful?	1	1	1	1	1	1	no	yes	no	Yes	yes	Yes.	Yes.
SBIC-739	A person of asian ethnicity annotated the following statement as hateful: What runs faster then a mexican who just stole your TV? His cousin with the DVD player. Is the given statement hateful?	1	1	1	1	1	1	no	yes	yes	Yes	yes	Yes.	Yes.
SBIC-740	A person of asian ethnicity annotated the following statement as hateful: What should you never give a dyslexic person for breakfast? Alpha-bits. Is the given statement hateful?	1	1	1	0	1	1	no	yes	yes	Yes	no	Yes.	Yes.
SBIC-741	A person of asian ethnicity annotated the following statement as hateful: What the difference between jelly and jam? I can't jelly my dick into an 8 year old.. Is the given statement hateful?	0	0	1	0	1	0	no	no	yes	Yes	yes	Yes.	Yes.
SBIC-742	A person of asian ethnicity annotated the following statement as hateful: What the fuck is wrong with these players? No fighting spirit whatsoever! Losing the ball and then walking!!!!. Is the given statement hateful?	0	0	0	0	0	0	no	yes	yes	Yes	no	Yes.	1. Yes
SBIC-743	A person of asian ethnicity annotated the following statement as hateful: What were the best r/pussypassdenied moments in your life?. Is the given statement hateful?	0	0	0	0	0	1	no	no	yes	Yes	yes	Yes.	The statement "
SBIC-744	A person of asian ethnicity annotated the following statement as hateful: What would a overdose victim’m eulogy be? “They died doing what they loved.”. Is the given statement hateful?	0	0	0	0	0	1	no	yes	no	No	no	Yes.	Yes. No
SBIC-745	A person of asian ethnicity annotated the following statement as hateful: What's Hitler's favorite breakfast beverage? Freshly squeezed orange jews.. Is the given statement hateful?	1	1	1	1	1	1	no	yes	yes	Yes	yes	Yes.	Yes.
SBIC-746	A person of asian ethnicity annotated the following statement as hateful: What's Hitler's favorite time of the year Gas season. Is the given statement hateful?	1	0	1	1	0	1	no	yes	yes	No	yes	Yes.	Yes. No
SBIC-747	A person of asian ethnicity annotated the following statement as hateful: What's a 1000 meters long and has an IQ of 68? A black lives matter parade.. Is the given statement hateful?	1	1	1	1	1	1	no	yes	yes	Yes	yes	Yes.	Yes.
SBIC-748	A person of asian ethnicity annotated the following statement as hateful: What's better than a gold medal at the Paralympics? Legs. Is the given statement hateful?	1	1	1	1	0	1	no	no	yes	Yes	no	Yes.	1. No
SBIC-749	A person of asian ethnicity annotated the following statement as hateful: What's better than winning the special Olympics? Not being retarded. Is the given statement hateful?	1	1	1	1	1	1	no	yes	yes	Yes	yes	Yes.	Yes.
SBIC-750	A person of asian ethnicity annotated the following statement as hateful: What's black and blue, and doesn't like sex? The kid in my trunk.. Is the given statement hateful?	1	0	1	0	1	1	no	yes	yes	Yes	yes	Yes.	Yes.
SBIC-751	A person of asian ethnicity annotated the following statement as hateful: What's black yellow and blurry? A bus full of niggers rolling down a hill. Is the given statement hateful?	1	1	1	1	1	1	no	yes	yes	Yes	yes	Yes.	Yes.
SBIC-752	A person of asian ethnicity annotated the following statement as hateful: What's common between Newton and the kid i stabbed to death? Newton Died virgin.. Is the given statement hateful?	0	0	1	0	0	0	no	yes	yes	Yes	no	Yes.	Yes. No
SBIC-753	A person of asian ethnicity annotated the following statement as hateful: What's even worse than black men? Black women feminists.. Is the given statement hateful?	1	1	1	1	1	1	no	yes	yes	Yes	yes	Yes.	Yes.
SBIC-754	A person of asian ethnicity annotated the following statement as hateful: What's she got that stick for if she can read [that book]?. Is the given statement hateful?	0	0	0	0	0	1	no	yes	yes	No	no	Yes.	1. Yes
SBIC-755	A person of asian ethnicity annotated the following statement as hateful: What's the best part about using a vegtible for sex? they can't escape.. Is the given statement hateful?	1	1	1	1	1	1	no	yes	yes	Yes	no	Yes.	A. Yes
SBIC-756	A person of asian ethnicity annotated the following statement as hateful: What's the best thing about fucking twenty four year olds? There's twenty of them.. Is the given statement hateful?	0	0	0	0	0	0	no	yes	yes	Yes	no	Yes.	Yes.
SBIC-757	A person of asian ethnicity annotated the following statement as hateful: What's the brightest star in Africa? Starvation. Is the given statement hateful?	1	1	1	1	1	0	no	yes	yes	Yes	no	Yes.	Yes.
SBIC-758	A person of asian ethnicity annotated the following statement as hateful: What's the difference between Batman and a black man? Batman can go out at might without robin.. Is the given statement hateful?	1	1	1	1	1	1	no	no	yes	Yes	yes	Yes.	Yes. No
SBIC-759	A person of asian ethnicity annotated the following statement as hateful: What's the difference between Santa Claus and a Holocaust Jew? Santa Claus is jolly, fat, and goes DOWN the chimney.. Is the given statement hateful?	1	1	1	1	0	1	no	no	yes	Yes	yes	Yes.	Yes.
SBIC-760	A person of asian ethnicity annotated the following statement as hateful: What's the difference between Santa and the Jews? Santa goes down the chimney.. Is the given statement hateful?	1	1	1	1	0	1	no	no	yes	Yes	yes	Yes.	Yes.
SBIC-761	A person of asian ethnicity annotated the following statement as hateful: What's the difference between a Black Lives Matter rally and this sub? Nothing, they both hate white people.. Is the given statement hateful?	1	1	1	1	1	1	no	yes	yes	Yes	yes	Yes.	Yes.
SBIC-762	A person of asian ethnicity annotated the following statement as hateful: What's the difference between a black person and a bucket of shit? The bucket.. Is the given statement hateful?	1	1	1	1	1	1	no	yes	yes	Yes	yes	Yes.	Yes.
SBIC-763	A person of asian ethnicity annotated the following statement as hateful: What's the difference between a blonde and a mosquito? A mosquito stops sucking after you slap it. Is the given statement hateful?	1	1	0	1	1	1	no	yes	no	Yes	yes	Yes.	The statement is
SBIC-764	A person of asian ethnicity annotated the following statement as hateful: What's the difference between a feminist and a cry baby? A cry baby stops crying when it grows up.. Is the given statement hateful?	1	1	1	1	1	1	no	yes	yes	Yes	yes	Yes.	Yes. No
SBIC-765	A person of asian ethnicity annotated the following statement as hateful: What's the difference between a feminist and a knife? A knife has a point.. Is the given statement hateful?	1	0	1	1	1	1	no	no	yes	Yes	yes	Yes.	Yes. No
SBIC-766	A person of asian ethnicity annotated the following statement as hateful: What's the difference between a fruit and a vegetable? Fruit doesn't scream when you try eating it. Is the given statement hateful?	0	0	0	1	0	1	no	no	no	No	no	Yes.	The statement is
SBIC-767	A person of asian ethnicity annotated the following statement as hateful: What's the difference between a jew and a pizza? The pizza doesn't screems when it gets into the oven. Is the given statement hateful?	1	1	1	1	1	1	no	no	no	Yes	yes	Yes.	Yes.
SBIC-768	A person of asian ethnicity annotated the following statement as hateful: What's the difference between a priest and a retard? The priest is behind a little and the retard is a little behind.. Is the given statement hateful?	1	1	1	1	1	1	no	yes	yes	Yes	yes	Yes.	Yes.
SBIC-769	A person of asian ethnicity annotated the following statement as hateful: What's the difference between anal sex and oral sex? Oral makes your day. Anal makes your hole weak.. Is the given statement hateful?	0	0	0	0	0	0	no	yes	yes	Yes	yes		Yes, the
SBIC-770	A person of asian ethnicity annotated the following statement as hateful: What's the difference between heroine and a black person? I think twice about shooting heroin.. Is the given statement hateful?	1	1	1	1	1	1	no	yes	yes	Yes	no	Yes.	Hateful.
SBIC-771	A person of asian ethnicity annotated the following statement as hateful: What's the difference between homeless people and rats? Nothing, they both are infestations to big cities. Is the given statement hateful?	1	1	1	1	1	1	no	yes	yes	Yes	yes	Yes.	Yes.
SBIC-772	A person of asian ethnicity annotated the following statement as hateful: What's the difference between my mum and cancer? My mum didn't beat cancer. Is the given statement hateful?	0	0	0	0	0	0	no	yes	yes	No	no	Yes.	A person of
SBIC-773	A person of asian ethnicity annotated the following statement as hateful: What's the only warm organ inside a deceased female body? My Dick. (it's not illegal if the cops don't know about it). Is the given statement hateful?	1	0	1	0	1	1	no	yes	yes	Yes	yes	Yes.	Yes.
SBIC-774	A person of asian ethnicity annotated the following statement as hateful: What's the size of a priest's bed? Come on, every kid should know this.. Is the given statement hateful?	1	1	1	1	0	1	no	yes	no	No	no	Yes.	The given statement is
SBIC-775	A person of asian ethnicity annotated the following statement as hateful: What's the worst part about being a black Jew? You have to sit at the back, of the oven. Is the given statement hateful?	1	1	1	1	1	1	no	yes	yes	Yes	yes	Yes.	Yes.
SBIC-776	A person of asian ethnicity annotated the following statement as hateful: What's the worst part about having sex with some one with downs syndrome? You're fucking retarded.. Is the given statement hateful?	1	1	1	1	1	1	no	yes	yes	Yes	yes	Yes.	Yes.
SBIC-777	A person of asian ethnicity annotated the following statement as hateful: What's worse than raping Helen Keller? Breaking her fingers so she can't tell anybody.. Is the given statement hateful?	1	1	1	1	1	1	no	yes	yes	Yes	yes	Yes.	Yes.
SBIC-778	A person of asian ethnicity annotated the following statement as hateful: Whats black and sits at the top of the stairs? A paraplegic after a house fire.. Is the given statement hateful?	1	1	1	1	1	1	no	yes	no	Yes	no	Yes.	No, the
SBIC-779	A person of asian ethnicity annotated the following statement as hateful: Whats the difference betweeen a feminist and a piece of shit? I don’t know.. Is the given statement hateful?	1	1	1	1	0	1	no	yes	yes	Yes	yes	Yes.	The statement is not
SBIC-780	A person of asian ethnicity annotated the following statement as hateful: Whats the difference between a blonde and an elevator? You dont even have to press a button for her to open up.. Is the given statement hateful?	1	1	1	0	1	1	no	(a).	yes	Yes	yes	Yes.	Yes. No
SBIC-781	A person of asian ethnicity annotated the following statement as hateful: Whats the difference between a tweaker and a black person? The tweaker started out as a good person. Is the given statement hateful?	1	1	1	1	1	1	no	no	yes	Yes	yes	Yes.	Yes.
SBIC-782	A person of asian ethnicity annotated the following statement as hateful: Whats the difference between hockey player and a women hippie A hockey player showers after 3 periods. Is the given statement hateful?	1	1	1	1	1	1	no	no	no	No	no	Yes.	Yes. No
SBIC-783	A person of asian ethnicity annotated the following statement as hateful: Whats the hardest bit about eating a vegtable? The wheelchair. Is the given statement hateful?	1	1	1	1	1	1	no	yes	no	Yes	no	Yes.	Yes.
SBIC-784	A person of asian ethnicity annotated the following statement as hateful: Whats the hardest part of the vegetable to eat? The wheelchair. Is the given statement hateful?	1	1	1	1	1	1	no	yes	no	Yes	yes	Yes.	Yes.
SBIC-785	A person of asian ethnicity annotated the following statement as hateful: What’s blue and black and hates sex? A 9 year old girl in my trunk. Is the given statement hateful?	1	1	1	1	1	1	no	yes	yes	Yes	yes	Yes.	Yes.
SBIC-786	A person of asian ethnicity annotated the following statement as hateful: What’s the best part about having sex with twenty nine year olds? There’s twenty of them!. Is the given statement hateful?	0	0	1	0	1	0	no	(I)	yes	Yes	no	Yes.	Yes.
SBIC-787	A person of asian ethnicity annotated the following statement as hateful: What’s the best part of being a doctor? Vegetables don’t need to give consent.. Is the given statement hateful?	1	1	1	0	1	1	no	no	yes	Yes	no	Yes.	The given statement
SBIC-788	A person of asian ethnicity annotated the following statement as hateful: What’s the best thing about fucking a 5 year old girl? You can flip her over and pretend she’s a 5 year old boy.. Is the given statement hateful?	1	1	1	1	1	1	no	Yes	yes	Yes	yes	Yes.	Yes.
SBIC-789	A person of asian ethnicity annotated the following statement as hateful: What’s the best thing about having sex with 21 year olds? There’s 20 of em. Is the given statement hateful?	0	0	1	0	0	0	no	(I)	yes	Yes	no	Yes.	Yes.
SBIC-790	A person of asian ethnicity annotated the following statement as hateful: What’s the difference between a feminist and an infant? I’d fuck the infant. Is the given statement hateful?	1	1	1	1	1	1	no	yes	yes	Yes	yes	Yes.	Yes.
SBIC-791	A person of asian ethnicity annotated the following statement as hateful: What’s the difference between a potato and my disabled 5 year old? One is a root vegetable the other is a vegetable I root. Is the given statement hateful?	1	0	1	1	1	1	no	no	no	No	no	Yes.	Yes.
SBIC-792	A person of asian ethnicity annotated the following statement as hateful: What’s the difference between a women and a computer You can punch information into a computer. Is the given statement hateful?	1	1	1	1	1	1	no	no	no	Yes	yes	Yes.	Yes. No
SBIC-793	A person of asian ethnicity annotated the following statement as hateful: What’s the difference between heroin and niggers? I’d actually think twice before shooting heroin. Is the given statement hateful?	1	1	1	1	1	1	no	yes	yes	Yes	yes	Yes.	Yes.
SBIC-794	A person of asian ethnicity annotated the following statement as hateful: What’s the difference between roadkill and a 9/11 victim? You can bury roadkill.. Is the given statement hateful?	1	0	0	1	1	1	no	yes	yes	No	yes	Yes.	The given statement
SBIC-795	A person of asian ethnicity annotated the following statement as hateful: What’s the difference between your wife and a computer? The computer shuts up after you hit it. Is the given statement hateful?	1	1	1	0	1	1	no	no	yes	Yes	yes	Yes.	Yes.
SBIC-796	A person of asian ethnicity annotated the following statement as hateful: What’s the hardest part of a vegetable to eat? The wheelchair. Is the given statement hateful?	1	1	1	1	1	1	no	yes	no	Yes	yes	Yes.	The statement is
SBIC-797	A person of asian ethnicity annotated the following statement as hateful: What’s worse than raping a deaf girl? Breaking her fingers so she can’t tell anyone.. Is the given statement hateful?	1	1	1	1	1	1	no	yes	yes	Yes	yes	Yes.	Yes.
SBIC-798	A person of asian ethnicity annotated the following statement as hateful: When people are presented with data that contradicts their beliefs they become more steadfast in those beliefs and this is especially true with the Left!. Is the given statement hateful?	0	0	1	1	0	0	no	no	no	No	no	Yes.	1. Yes
SBIC-799	A person of asian ethnicity annotated the following statement as hateful: When two fat American's have sex it's... MISSIONARY IMPOSSIBLE.. Is the given statement hateful?	1	1	1	1	1	1	no	yes	yes	Yes	yes	Yes.	Yes. No
SBIC-800	A person of asian ethnicity annotated the following statement as hateful: When you ask a question and the person can't answer it without fckn arguing or jumping to something irrelevant. Well, thanks anyway!. Is the given statement hateful?	0	0	0	0	0	0	no	yes	yes	Yes	no	Yes.	1. Yes
SBIC-801	A person of asian ethnicity annotated the following statement as hateful: When you can be arrested and imprisoned for tweeting your opinion, your government might have too much power.. Is the given statement hateful?	0	0	0	0	0	0	no	yes	yes	No	no	Yes.	No, the
SBIC-802	A person of asian ethnicity annotated the following statement as hateful: When you say you love me, know I love you more . And when you say you need me, know I need you more. Is the given statement hateful?	0	0	0	0	0	0	yes	yes	no	No	no	Yes.	Yes. No
SBIC-803	A person of asian ethnicity annotated the following statement as hateful: Where are Jews most found? In the atmosphere.. Is the given statement hateful?	1	1	1	1	1	1	no	no	yes	Yes	no	Yes.	Yes. No
SBIC-804	A person of asian ethnicity annotated the following statement as hateful: Where are all the feminist and leftist riots/rallies in the streets against Hollywood's pedophilia and sexual harassment culture?. Is the given statement hateful?	1	0	1	1	1	1	no	yes	yes	No	no	Yes.	1. Yes
SBIC-805	A person of asian ethnicity annotated the following statement as hateful: Where could you find a quadriplegic? Where you left him.. Is the given statement hateful?	1	1	1	1	1	0	no	yes	no	No	yes	Yes.	Yes.
SBIC-806	A person of asian ethnicity annotated the following statement as hateful: Who is the best boxer of all time? Jim Jones. He knocked out 909 people with one punch.. Is the given statement hateful?	0	0	0	0	0	0	no	no	yes	No	yes	Yes.	Yes.
SBIC-807	A person of asian ethnicity annotated the following statement as hateful: Who's downtown and wanna buy me a coffee and food bc Wells Fargo is fucking me. Is the given statement hateful?	0	0	0	0	0	0	no	yes	no	Yes	no	Yes.	Yes.
SBIC-808	A person of asian ethnicity annotated the following statement as hateful: Why am I crying that I wasnt able to watch last night and all of my friends were telling me how good it was?. Is the given statement hateful?	0	0	0	0	0	0	no	no	no	No	no	Yes.	No, the
SBIC-809	A person of asian ethnicity annotated the following statement as hateful: Why are all blacks and gays left handed? They all have no rights.. Is the given statement hateful?	1	1	1	1	1	1	no	yes	yes	Yes	yes	Yes.	Yes.
SBIC-810	A person of asian ethnicity annotated the following statement as hateful: Why are all women lefty Because they have no rights. Is the given statement hateful?	1	1	1	1	1	1	no	yes	yes	Yes	yes	Yes.	Yes.
SBIC-811	A person of asian ethnicity annotated the following statement as hateful: Why are there so many party stores in the ghetto? Like do all the poor people like to celebrate they're poor?. Is the given statement hateful?	1	1	1	0	1	1	no	yes	yes	Yes	yes	Yes.	Yes.
SBIC-812	A person of asian ethnicity annotated the following statement as hateful: Why can't orphans play baseball? Why can't orphans play baseball? They dont know where home is.. Is the given statement hateful?	1	1	1	1	1	0	no	yes	yes	No	no	Yes.	Yes. No
SBIC-813	A person of asian ethnicity annotated the following statement as hateful: Why can't you act like a normal person? You don't have Asperger's. There's nothing wrong with you. You're just looking for attention/excuses. If you'd just stop behaving so oddly, you wouldn't need to blame it on a disease.. Is the given statement hateful?	1	0	1	1	0	1	no	no	yes	Yes	yes	Yes.	Yes, the
SBIC-814	A person of asian ethnicity annotated the following statement as hateful: Why couldn’t Sally go to school Sally has crippling depression. Is the given statement hateful?	0	0	0	0	0	0	no	no	no	No	no	Yes.	Yes.
SBIC-815	A person of asian ethnicity annotated the following statement as hateful: Why did Hitler kill the nazi? It was past its jew date. Is the given statement hateful?	1	1	1	1	1	1	no	yes	yes	Yes	yes	Yes.	Yes.
SBIC-816	A person of asian ethnicity annotated the following statement as hateful: Why did Hitler kill the out-of-time drummer? Rhythmic cleansing. Is the given statement hateful?	1	0	1	1	1	1	no	yes	yes	Yes	yes	Yes.	Yes. No
SBIC-817	A person of asian ethnicity annotated the following statement as hateful: Why did the feminist jump off the building? She was trying to equalize the suicide rates. Is the given statement hateful?	1	1	1	1	1	1	no	yes	no	No	no	Yes.	Yes.
SBIC-818	A person of asian ethnicity annotated the following statement as hateful: Why did the sun never set on the British Empire? Even God didn't trust the English in the dark.. Is the given statement hateful?	1	1	1	1	1	1	no	no	yes	Yes	no	Yes.	Yes.
SBIC-819	A person of asian ethnicity annotated the following statement as hateful: Why do Puerto Ricans hang the Puerto Rican flag in their car? So they dont steal from each other.. Is the given statement hateful?	1	1	1	1	1	1	no	no	no	Yes	yes	Yes.	Yes.
SBIC-820	A person of asian ethnicity annotated the following statement as hateful: Why do blacks only have nightmares? Because the rednecks shot the only one with a dream.. Is the given statement hateful?	1	1	1	1	1	1	no	yes	yes	Yes	yes	Yes.	The given statement
SBIC-821	A person of asian ethnicity annotated the following statement as hateful: Why do epileptics bexome atheists in December? Because they found out that "Jesus is the reason for the seizin'". Is the given statement hateful?	0	0	1	0	1	0	no	yes	yes	No	no	Yes.	Yes.
SBIC-822	A person of asian ethnicity annotated the following statement as hateful: Why do sumo wrestlers shave their legs? So that people don't confuse them for feminists.. Is the given statement hateful?	1	1	1	1	1	0	no	no	no	No	yes	Yes.	Yes.
SBIC-823	A person of asian ethnicity annotated the following statement as hateful: Why do the white kids only shoot up schools? cuz all the black kids shot each other. Is the given statement hateful?	1	1	1	1	1	1	no	yes	yes	Yes	yes	Yes.	Yes.
SBIC-824	A person of asian ethnicity annotated the following statement as hateful: Why do we celebrate Hitler's birthday with weed? Cause' he already smoked all the jews.. Is the given statement hateful?	1	1	1	1	0	1	no	yes	yes	Yes	yes	Yes.	Yes.
SBIC-825	A person of asian ethnicity annotated the following statement as hateful: Why does being a Black Jew suck so much? Having to sit in the back of the oven.. Is the given statement hateful?	1	1	1	1	1	1	no	yes	yes	Yes	yes	Yes.	Yes.
SBIC-826	A person of asian ethnicity annotated the following statement as hateful: Why does the myth that women rarely lie about rape persist?. Is the given statement hateful?	0	0	1	0	0	1	no	no	no	No	no	Yes.	1. Yes
SBIC-827	A person of asian ethnicity annotated the following statement as hateful: Why doesn't Mexico have an Olimpic team? All the ones who can run,jump or swim have allready crossed the border.. Is the given statement hateful?	1	1	1	1	1	1	no	no	no	No	no	Yes.	Yes.
SBIC-828	A person of asian ethnicity annotated the following statement as hateful: Why don't bookmakers take bets on the special Olympics? because they're all winners. Is the given statement hateful?	1	0	1	1	1	0	no	yes	no	No	no	Yes.	Hate is
SBIC-829	A person of asian ethnicity annotated the following statement as hateful: Why don’t Jews get gifts for Christmas? Cuz why the fuck would you give a gift to a pile of ashes. Is the given statement hateful?	1	1	1	1	1	1	no	yes	yes	Yes	yes	Yes.	Yes.
SBIC-830	A person of asian ethnicity annotated the following statement as hateful: Why is chess prohibited in Islam? Because the queen moves freely.. Is the given statement hateful?	1	1	1	1	0	1	no	no	yes	No	no	Yes.	Yes.
SBIC-831	A person of asian ethnicity annotated the following statement as hateful: Why is the camel called the ship of the desert? Because it’s filled with Arab seamen. Is the given statement hateful?	1	1	1	1	0	1	no	yes	yes	No	yes	Yes.	Yes.
SBIC-832	A person of asian ethnicity annotated the following statement as hateful: Why should they ban weed from hospitals? I don't like my vegetables baked.. Is the given statement hateful?	0	0	0	0	0	1	no	no	no	No	no	Yes.	Hate:
SBIC-833	A person of asian ethnicity annotated the following statement as hateful: Why should you never rape elderly women? because sex is for procreation you fucking Heathen!. Is the given statement hateful?	1	0	1	1	1	0	no	yes	yes	Yes	yes	Yes.	A person of
SBIC-834	A person of asian ethnicity annotated the following statement as hateful: Why would you watch porn... When there's an elementary school right down the road.. Is the given statement hateful?	0	0	0	1	1	0	no	no	yes	Yes	no	Yes.	Yes.
SBIC-835	A person of asian ethnicity annotated the following statement as hateful: Wind 6.6 mph NNW. Barometer 1029.3 hPa, Falling slowly. Temperature 15.5C, feels like 12.4C. Rain today 0.0 mm. Humidity 51%. f1.. Is the given statement hateful?	0	0	0	0	0	0	no	no	No	No	no	Yes.	No.
SBIC-836	A person of asian ethnicity annotated the following statement as hateful: With some dog breeds, it's advised that you don't look at them directly in the eye. I've found a simple solution to that problem. Anal.. Is the given statement hateful?	0	0	0	0	0	1	no	no	No	No	no	Yes.	Yes. No
SBIC-837	A person of asian ethnicity annotated the following statement as hateful: With the help of God we will be congratulating an Irish WN Party on their election success in the not so distant future .. Is the given statement hateful?	0	0	0	0	0	1	no	no	no	No	no	Yes.	Yes.
SBIC-838	A person of asian ethnicity annotated the following statement as hateful: With the polarization and hate I'm seeing, it seems to me that there are a lot of people that are going to die soon.. Is the given statement hateful?	0	0	0	0	0	0	no	yes	no	Yes	no	Yes.	Yes.
SBIC-839	A person of asian ethnicity annotated the following statement as hateful: Women just keep coming to me and I just keep raping them. They trust this police uniform way too much.. Is the given statement hateful?	1	1	1	1	1	1	no	yes	yes	Yes	yes	Yes.	Yes.
SBIC-840	A person of asian ethnicity annotated the following statement as hateful: Women think sub8 men are creepy; women give birth to sub8 men; therefore women think their sub8 sons are creepy Women are the shittiest people ever to exist.. Is the given statement hateful?	1	1	1	1	1	1	no	yes	yes	Yes	yes	Yes.	Yes.
SBIC-841	A person of asian ethnicity annotated the following statement as hateful: Would Jason Vorhees be considered a chad because of his size and strength?. Is the given statement hateful?	0	0	0	0	0	0	no	yes	yes	No	no	Yes.	1. Yes
SBIC-842	A person of asian ethnicity annotated the following statement as hateful: Would the police release evidence of Marc Lépine and Elliot Rodger being baited and goaded by feminists?. Is the given statement hateful?	0	0	0	0	0	0	no	yes	no	No	no	Yes.	Yes.
SBIC-843	A person of asian ethnicity annotated the following statement as hateful: YALL MOTHERFUCKER NORMIES WILL GET SPOILERS ON SEASON 8 OF GAME OF THRONES IF YOU DONT LEAVE NOW. Is the given statement hateful?	0	0	0	0	0	0	no	yes	yes	Yes	yes	Yes.	Hateful.
SBIC-844	A person of asian ethnicity annotated the following statement as hateful: Yall black ass hoes aint east African. Is the given statement hateful?	1	1	1	1	1	1	no	yes	yes	Yes	yes	Yes.	Hateful.
SBIC-845	A person of asian ethnicity annotated the following statement as hateful: Yeah I watch the History Channel all the time and I am in all the Honor classes I just wanted to do something and yes I do have the muscle to back it up .. Is the given statement hateful?	0	0	0	0	0	0	no	no	no	No	no	Yes.	Yes. No
SBIC-846	A person of asian ethnicity annotated the following statement as hateful: Yeah, you might be able to hit a quarter from two miles away with your .300 Win Mag, but I have over 1,000 headshots in Day of Infamy.. Is the given statement hateful?	0	0	0	0	0	0	no	no	no	No	no	Yes.	Yes. No
SBIC-847	A person of asian ethnicity annotated the following statement as hateful: You CUCKS and Patriots....and my Brothers.....UNITE....ITS TIME !. Is the given statement hateful?	0	0	0	0	0	0	no	yes	yes	No	no	Yes.	A. Yes
SBIC-848	A person of asian ethnicity annotated the following statement as hateful: You communicate like a girl, I just don't get it. I'm a guy. You need to just say what you mean!. Is the given statement hateful?	0	1	0	0	0	0	no	no	yes	Yes	no	Yes.	Hateful.
SBIC-849	A person of asian ethnicity annotated the following statement as hateful: You hear a bunch of machine gun bullets and see a black man slump over dead on your porch, what do you do? Stop laughing and reload. Is the given statement hateful?	1	1	1	1	1	1	no	yes	yes	Yes	yes	Yes.	Yes.
SBIC-850	A person of asian ethnicity annotated the following statement as hateful: You incels are ugly This is why you're incel. Is the given statement hateful?	1	1	1	0	1	1	yes	yes	yes	Yes	yes		Yes, the
SBIC-851	A person of asian ethnicity annotated the following statement as hateful: You just get on an Uber and you keep riding and them get off They are the new whores. Is the given statement hateful?	0	0	0	1	0	1	no	yes	yes	Yes	yes	Yes.	Yes.
SBIC-852	A person of asian ethnicity annotated the following statement as hateful: You know, Fortnite actually reminds of school You hop out the bus and shoot everyone you see.. Is the given statement hateful?	0	0	1	0	0	1	no	no	yes	Yes	no	Yes.	Yes. No
SBIC-853	A person of asian ethnicity annotated the following statement as hateful: You mad because your bitch found out you a hoe &#128514;&#129335;&#127997;‍♀️. Is the given statement hateful?	0	1	0	0	0	0	no	yes	yes	Yes	yes	Yes.	1. Yes
SBIC-854	A person of asian ethnicity annotated the following statement as hateful: You might be gleefully anticipating a day off, only to be conf... More for Aquarius URL. Is the given statement hateful?	0	0	0	0	0	0	no	no	no	No	no	Yes.	Hateful:
SBIC-855	A person of asian ethnicity annotated the following statement as hateful: You niggas talking to these females trying to get some pussy but dont realize you're only boosting their ego and getting curved.. Is the given statement hateful?	1	0	1	1	1	0	no	Yes	yes	Yes	yes	Yes.	Hateful.
SBIC-856	A person of asian ethnicity annotated the following statement as hateful: You should have heard of him becouse he is the greatest chess player of all times .. Is the given statement hateful?	0	0	0	0	0	0	no	no	no	No	no	Yes.	Yes. No
SBIC-857	A person of asian ethnicity annotated the following statement as hateful: Your in ya cell 22 hours a day here u dont in general walk around the landings .. Is the given statement hateful?	0	0	0	0	0	0	no	no	yes	Yes	no	Yes.	Yes. No
SBIC-858	A person of asian ethnicity annotated the following statement as hateful: [Life Fuel] On-duty NYPD officers handcuffed 17-year-old girl, took her to deserted spot and raped her. Is the given statement hateful?	0	0	0	0	0	0	no	yes	yes	Yes	no	Yes.	Yes.
SBIC-859	A person of asian ethnicity annotated the following statement as hateful: [META] We knew three years ago that they were creating shill account to control the discussion here.. Is the given statement hateful?	0	0	0	0	0	0	no	no	no	No	no	The given statement	1. Yes
SBIC-860	A person of asian ethnicity annotated the following statement as hateful: [X-Post]Gang sexually assaulting, killing men in Mumbai - TOI gives only one inch space on front page.. Is the given statement hateful?	0	0	0	0	0	0	no	yes	yes	No	no	Yes.	Yes.
SBIC-861	A person of asian ethnicity annotated the following statement as hateful: ``TheDark Romance of Dian Fossey '' ( 1990 ) by Harold TP Hayes Under the mentorship of noted anthropologist Louis Leakey , Dian Fosse spent 16 years in Africa researching the last remaining mountain gorillas .. Is the given statement hateful?	0	0	0	0	0	0	no	no	No	No	no	Yes.	A person of
SBIC-862	A person of asian ethnicity annotated the following statement as hateful: a cop saw a blonde on her knees under a streetlight . " can i help you ? " she asked . the blonde replied , " i dropped my diamond ring and i 'm looking for it . " the cop asked , " did you drop it here ? " the woman replied , " no , i dropped it about a block away , but the light 's better here . ". Is the given statement …	0	0	0	0	0	0	no	no	No	No	no	Yes.	No, the
SBIC-863	A person of asian ethnicity annotated the following statement as hateful: a gay muslim walks into a bar . <repeat> he ordered shots for everyone .. Is the given statement hateful?	1	1	1	1	0	1	no	yes	yes	Yes	yes	Yes.	A person of
SBIC-864	A person of asian ethnicity annotated the following statement as hateful: a jew , a mexican and a black guy walk into the bar . <repeat> the bartender pulls out his gun and says " get the fuck outta here ". Is the given statement hateful?	1	1	1	1	0	1	no	yes	yes	Yes	yes	Yes.	Yes.
SBIC-865	A person of asian ethnicity annotated the following statement as hateful: a man was brought in on pedophilia and incest charges according to the prosecution , the man had raped his daughter many times . the man however , was very cunning . he had a defense he thought was perfect . in court , the man said , " i have a tattoo on my penis , and i bet my daughter ca n't tell you what it is . " the da…	0	0	0	0	0	0	no	yes	Yes	Yes	yes	Yes.	No.
SBIC-866	A person of asian ethnicity annotated the following statement as hateful: a priest asks the convicted murderer at the electric chair , " do you have any last requests ? ” " yes , " replies the murderer . " can you please hold my hand ? ". Is the given statement hateful?	0	0	0	0	0	0	no	yes	yes	No	no	Yes.	Yes. No
SBIC-867	A person of asian ethnicity annotated the following statement as hateful: ah why is brushing the hair so damn difficult and exhausting ;-; that's the worst part every morning. Is the given statement hateful?	0	0	0	0	0	0	no	yes	yes	No	no	Yes.	1. No
SBIC-868	A person of asian ethnicity annotated the following statement as hateful: alabama where eharmony and ancestry are the same website .. Is the given statement hateful?	1	1	1	1	0	1	no	no	Yes	No	no	Yes.	No, the
SBIC-869	A person of asian ethnicity annotated the following statement as hateful: also the context of this is just, Fucking Horrible. Is the given statement hateful?	0	0	0	0	0	0	no	yes	yes	Yes	no	Yes.	1. Yes
SBIC-870	A person of asian ethnicity annotated the following statement as hateful: anybody that shitted on me, I ain't fucking with none of ya!!!!. Is the given statement hateful?	0	0	0	0	0	0	no	yes	yes	Yes	yes	Yes.	Hateful.
SBIC-871	A person of asian ethnicity annotated the following statement as hateful: anything you can do to bait Rich Black NFL and NBA players into attacking Whites is good. Is the given statement hateful?	1	1	1	1	1	1	no	yes	yes	Yes	yes	Yes.	1. Yes
SBIC-872	A person of asian ethnicity annotated the following statement as hateful: because in that moment if i had told them when i told the school someone sexually assulted me and they didnt do anything would they believe?. Is the given statement hateful?	0	0	0	0	0	0	no	yes	no	No	no	Yes.	No, the
SBIC-873	A person of asian ethnicity annotated the following statement as hateful: black people are like tires they work better with chains. Is the given statement hateful?	1	1	1	1	1	1	no	yes	yes	Yes	yes	Yes.	Hate.
SBIC-874	A person of asian ethnicity annotated the following statement as hateful: cripples what do you call three people in wheelchairs stacked on top of each other ? a vegetable rack .. Is the given statement hateful?	1	1	1	1	1	1	no	yes	yes	Yes	yes	Yes.	Yes.
SBIC-875	A person of asian ethnicity annotated the following statement as hateful: dead baby joke mom : " why are these scissors so sticky ? " son : " sorry , i cut something wet . " mom : what 'd you cut with scissors that was wet ? <repeat> " son : " an infant 's windpipe ". Is the given statement hateful?	0	0	0	0	0	0	no	yes	yes	Yes	yes	Yes.	No, the
SBIC-876	A person of asian ethnicity annotated the following statement as hateful: drawing for u GOD I AM SO BAD AT DRAWING ITS SO BORING (has pen) god drawing is so fun, omg i wanna drawww (doesnt know where that idiot is). Is the given statement hateful?	0	0	0	0	0	0	no	yes	yes	Yes	no	Yes.	1. No
SBIC-877	A person of asian ethnicity annotated the following statement as hateful: fat bitches fat bitches heeeey. Is the given statement hateful?	0	1	0	0	0	1	no	yes	yes	Yes	yes	Yes.	Hate.
SBIC-878	A person of asian ethnicity annotated the following statement as hateful: fat chicks . <repeat> make uggs look like socks .. Is the given statement hateful?	1	1	1	0	1	1	no	yes	yes	Yes	yes	Yes.	A person of
SBIC-879	A person of asian ethnicity annotated the following statement as hateful: fred needs crutches , thomas has a terrible stutter they 're best friends . one day , they hear that a faith healer is in town . thomas tells his friend they should go and see if they can make it on stage . fred reluctantly agrees , and they go . even better , they get called on stage . fred explains that he 's always had t…	0	0	0	0	0	0	no	no	Yes	No	yes	Yes.
SBIC-880	A person of asian ethnicity annotated the following statement as hateful: hey have you seen rolling thunder ? last time i saw him he was burning rubber with the new wheelchair he got from his disability benefits outside of wal - mart .. Is the given statement hateful?	1	0	1	1	1	0	no	yes	Yes	Yes	yes	Yes.	Yes.
SBIC-881	A person of asian ethnicity annotated the following statement as hateful: how do they know what shampoo everyone in the twin towers used? they found their head and shoulders everywhere. Is the given statement hateful?	0	0	1	0	0	1	no	yes	no	No	no	Yes.	Hateful.
SBIC-882	A person of asian ethnicity annotated the following statement as hateful: how do you fit a fat woman in a bikini ? take the f out of fat and the f out of weigh .. Is the given statement hateful?	1	0	1	1	1	1	no	yes	yes	Yes	yes	Yes.	1. Yes
SBIC-883	A person of asian ethnicity annotated the following statement as hateful: how do you give a redneck aids ? get a black guy to rape his sister. Is the given statement hateful?	1	1	1	1	1	1	no	yes	yes	Yes	yes	Yes.	Yes.
SBIC-884	A person of asian ethnicity annotated the following statement as hateful: how do you kill a retard ? hand him a knife and ask him " who 's special ? ". Is the given statement hateful?	1	1	1	1	1	1	no	yes	yes	Yes	yes	Yes.	Yes.
SBIC-885	A person of asian ethnicity annotated the following statement as hateful: how do you starve a black man . <repeat> put his food stamps under his work boots .. Is the given statement hateful?	1	1	1	1	1	1	no	yes	yes	Yes	yes	Yes.	Yes, the
SBIC-886	A person of asian ethnicity annotated the following statement as hateful: how does a redneck find a sheep in his field ? sexy .. Is the given statement hateful?	1	1	1	0	1	0	no	yes	yes	Yes	yes	Yes.	Yes. No
SBIC-887	A person of asian ethnicity annotated the following statement as hateful: how many feminists does it take to change a light bulb ? feminists ca n't change anything .. Is the given statement hateful?	1	1	1	0	1	1	no	no	yes	Yes	yes	Yes.	Yes. No
SBIC-888	A person of asian ethnicity annotated the following statement as hateful: how many times can you screw a blonde ? i do n't know , how much time you got ?. Is the given statement hateful?	1	1	1	0	1	1	no	yes	yes	Yes	yes	Yes.	1. Yes
SBIC-889	A person of asian ethnicity annotated the following statement as hateful: how to pick up chicks how do you pick up a black chick ? noose . how do you pick up a mexican chick ? border patrol . how do you pick up a muslim chick ? body bag . how do you pick up a jewish chick ? dustpan and brush . how do you pick up white chicks ? flunitrazepam .. Is the given statement hateful?	1	1	1	1	1	1	no	yes	yes	Yes	yes	Yes.	Yes, the
SBIC-890	A person of asian ethnicity annotated the following statement as hateful: i hate ole dusty ass mississippi but jus for these moments i gotta be there. Is the given statement hateful?	0	0	0	0	0	0	no	yes	yes	Yes	yes	Yes.	1. Yes
SBIC-891	A person of asian ethnicity annotated the following statement as hateful: i knew a guy who died in a terrorist attack . <repeat> his last words were " allahu akbar ". Is the given statement hateful?	1	1	1	0	1	1	no	yes	yes	No	no	Yes.	Yes.
SBIC-892	A person of asian ethnicity annotated the following statement as hateful: i kno this aint canon but tbh cyaron's leader should be you, AZALEA's dia and Guilty Kiss' yoshiko xndnaxmks. Is the given statement hateful?	0	0	0	0	0	0	no	yes	yes	No	no	Yes.	1. Yes
SBIC-893	A person of asian ethnicity annotated the following statement as hateful: i like my women like my wine aged <number> years and stored in the cellar. Is the given statement hateful?	1	1	1	1	1	1	no	no	no	Yes	no	Yes.	1. Yes
SBIC-894	A person of asian ethnicity annotated the following statement as hateful: i like wanking whilst looking at myself in the mirror . my driving instructor does n't .. Is the given statement hateful?	0	0	0	0	0	0	no	no	no	No	no	Yes.	Hateful.
SBIC-895	A person of asian ethnicity annotated the following statement as hateful: i named my son michael simon albert timothy charles brian kevin andrew nicholas frederick anthony donald victor alfonse lawrence theodore stephen william jacob alexander richard benjamin arthur daniel aidan lucas john oliver david sebastian henry ryan julian evan cameron dominic leonardo . <repeat> . <repeat> ut the little …	0	0	0	0	0	1	no	yes	Yes	Yes	yes	Yes.
SBIC-896	A person of asian ethnicity annotated the following statement as hateful: i think i need to find a new girlfriend she is starting to learn to talk now. Is the given statement hateful?	0	0	1	0	0	0	no	no	no	No	no	Yes.	1. Yes
SBIC-897	A person of asian ethnicity annotated the following statement as hateful: i want a dyke clique. Is the given statement hateful?	0	1	0	0	0	0	no	yes	yes	Yes	yes	Yes.	1. Yes
SBIC-898	A person of asian ethnicity annotated the following statement as hateful: i want to be reincarnated as a bacteria living in the pubic hair of the artist IU. Is the given statement hateful?	0	0	0	0	0	0	no	yes	yes	Yes	no	Yes.	Hate.
SBIC-899	A person of asian ethnicity annotated the following statement as hateful: i will never forgive the rihanna navi for letting KIB flop but that trash ass Needed Me and equally bad LOTB are legitimate HITS!!. Is the given statement hateful?	0	0	0	0	0	0	no	yes	yes	Yes	no	Yes.	Hateful.
SBIC-900	A person of asian ethnicity annotated the following statement as hateful: if any one has any info on the austin texas band Straight Laced any info please contact me at skinranger@USER.com white power 88. Is the given statement hateful?	0	1	0	0	0	1	no	no	no	No	no	Yes.	Yes.
SBIC-901	A person of asian ethnicity annotated the following statement as hateful: if i had a dollar for every gender . <repeat> i 'd have $ <number> and a pile of counterfeits .. Is the given statement hateful?	1	1	1	1	0	1	no	yes	yes	Yes	no	Yes.	A. Yes
SBIC-902	A person of asian ethnicity annotated the following statement as hateful: if you donate just <number> pound a month . . . you can help us make another advert with sad looking african children in it .. Is the given statement hateful?	1	1	1	1	1	1	no	no	yes	Yes	yes	Yes.	Yes. No
SBIC-903	A person of asian ethnicity annotated the following statement as hateful: illegal check to the head? are you fucking stupid???. Is the given statement hateful?	0	0	0	0	0	1	no	yes	yes	Yes	yes	Yes.	1. Yes
SBIC-904	A person of asian ethnicity annotated the following statement as hateful: in at halle's so she can get stuff to spend the night and i kid you not, i have been in her dang car for a good 20 mins. Is the given statement hateful?	0	0	0	0	0	0	no	yes	yes	No	no	Yes.	1. Yes
SBIC-905	A person of asian ethnicity annotated the following statement as hateful: is the glass half full or half empty ? i really do n't know , because there 's different ways to look at it : - optimism : the glass is half full . - pessimism : the glass is half empty . - feminism : the glass is raping me .. Is the given statement hateful?	1	1	1	1	1	1	no	yes	no	No	yes	Yes.	Hateful.
[truncated: 74 more rows]
