# Supplementary material
Source: ML conference proceedings conference paper supplement (https://aclanthology.org/2024.emnlp-main.886)
Supplement: software [file P2_3.xlsx]

## Sheet: Sheet1
text	label	flan-t5-xxl
The following statement was labeled non-hateful by 50% annotators: i live and work with many legal mexican immigrants who are great citizens and trump supporters they have no problem with deporting illegals maga . Is the given statement hateful?	1	non-hateful
The following statement was labeled non-hateful by 50% annotators: in britain the prime minister a childless woman london mayor a moslem invader in command of london police a lesbian in command of london fire brigade a fat woman scotland first minister a childless woman . Is the given statement hateful?	0	no
The following statement was labeled non-hateful by 50% annotators: <user> <user> there shd be a film called no hindus in kashmir wud be perfect islamic fanaticsm movement in kashmir . Is the given statement hateful?	1	no
The following statement was labeled non-hateful by 50% annotators: jews defends jews regardless muslims defend muslins regardless christian european attack christians christian people are on their own and jews and muslims have another home we don ffs we do not why can not people understand that it not that difficult . Is the given statement hateful?	1	no
The following statement was labeled non-hateful by 50% annotators: the non partisan congressional budget office cbo has released their report on sens lindsey graham and dick durbin <number> the dream act the report shows that their legislation would add <number> billion to the deficit over a ten year period and lots more immigrant scum . Is the given statement hateful?	0	yes
The following statement was labeled non-hateful by 50% annotators: got a couple more companies you can boycott this christmas season first one is ford they have got several <number> ads out featuring blip length shots of white men w other than white women this is becoming the norm too you defile the white man that will drive our women into their hands wn . Is the given statement hateful?	1	non-hateful
The following statement was labeled non-hateful by 50% annotators: people are going to blame the white nationalists for what happened but they were initially peaceful before antifa showed up what happened yesterday is the result of political correctness and the left legitimising political violence that why the establishment leftists do not condemn antifa <number> <number> . Is the given statement…	1	non-hateful
The following statement was labeled non-hateful by 50% annotators: you are completely correct without it communication breaks down leading to distortions misrepresentations this is a very serious problem among white males who failed to learn the language effectively . Is the given statement hateful?	1	non-hateful
The following statement was labeled non-hateful by 50% annotators: caucasians wearing masks to prevent coronavirus and still don ’ t wash their hands . Is the given statement hateful?	1	non-hateful
The following statement was labeled non-hateful by 50% annotators: <user> <number> americans dead because of an illegal immigrant this is infuriating enforce our laws deport them . Is the given statement hateful?	0	yes
The following statement was labeled non-hateful by 50% annotators: <user> besudes guilt saviour complex among whites has reached such an alarming level that they want to save indian girls from being raped when the rate of sexual assault in their own countries is significantly higher . Is the given statement hateful?	1	non-hateful
The following statement was labeled non-hateful by 50% annotators: thank a white man you live in his world and why do you islanders say you are canadian so rude really if i lived in a brown country even with citizenship i would never call myself ethiopian chinese indian you are a caribbean living in canada . Is the given statement hateful?	0	yes
The following statement was labeled non-hateful by 50% annotators: nigger faggot retard beaner dishwasher time to see if i get ban . Is the given statement hateful?	0	yes
The following statement was labeled non-hateful by 50% annotators: your idea of compassion is allowing kate steinle killer go free that not compassion it a mental illness let be compassionate to the legal citizens of this country stop funding illegal immigrants stop encouraging lawlessness and build that fucking wall maga gabfam news . Is the given statement hateful?	1	yes
The following statement was labeled non-hateful by 50% annotators: why don ’ t white boys with curly hair comb it looks like a bird ’ nest . Is the given statement hateful?	1	non-hateful
The following statement was labeled non-hateful by 50% annotators: blow a stack for yo niggas with yo trapping ass . Is the given statement hateful?	1	yes
The following statement was labeled non-hateful by 50% annotators: <user> yes they put fear in black people jews and even white civil rights workers and they deny the holocaust ever happened . Is the given statement hateful?	1	non-hateful
The following statement was labeled non-hateful by 50% annotators: they playing a lot of ethnic music at this white ass wedding . Is the given statement hateful?	1	yes
The following statement was labeled non-hateful by 50% annotators: that a retarded non argument the bible is also a best seller in communist china . Is the given statement hateful?	0	hateful
The following statement was labeled non-hateful by 50% annotators: <user> i think immigrants should replace people like you . Is the given statement hateful?	1	non-hateful
The following statement was labeled non-hateful by 50% annotators: every time a nigger in africa gets pregnant abort it make it a law you can about up to <number> years . Is the given statement hateful?	0	yes
The following statement was labeled non-hateful by 50% annotators: nothing royal about this wedding he is a bastard and she is a nignog halfbreed thot and a divorced catholic to boot it is notable that both the father of the bride and the father of the groom did not attend . Is the given statement hateful?	0	yes
The following statement was labeled non-hateful by 50% annotators: what sort of white man or woman would vote for this nigger . Is the given statement hateful?	0	yes
The following statement was labeled non-hateful by 50% annotators: diversity is a code word for white genocide immigrants contribute and integrate 3 rd world retards freeload and fornicate . Is the given statement hateful?	0	hateful
The following statement was labeled non-hateful by 50% annotators: im literally not a zionist but dear lord how hard is it to just recognize that people just genuinely despise jews . Is the given statement hateful?	1	non-hateful
The following statement was labeled non-hateful by 50% annotators: stupid nigger given grades admissioin to school job degree position he never earned and doesnt have iq for fuck off . Is the given statement hateful?	0	yes
The following statement was labeled non-hateful by 50% annotators: <user> humor negro 😂 😂 😂 😂 😂 . Is the given statement hateful?	1	non-hateful
The following statement was labeled non-hateful by 50% annotators: bump dis nigger . Is the given statement hateful?	0	yes
The following statement was labeled non-hateful by 50% annotators: would be hilarious if the un building was turned into homeless shelter or hell why not a refugee center . Is the given statement hateful?	1	non-hateful
The following statement was labeled non-hateful by 50% annotators: i am confused how a president blocked stimulus checks for those who married to immigrants while he himself married to an immigrant . Is the given statement hateful?	1	non-hateful
The following statement was labeled non-hateful by 50% annotators: how pissed are you if you are japanese chinese korean ya know real asians and now the goat fuckers are called asian too to avoid calling them arabs . Is the given statement hateful?	0	yes
The following statement was labeled non-hateful by 50% annotators: i ’ ve always wanted to beat up a nigga in front of his child so the child can grow up and remember it forever . Is the given statement hateful?	0	yes
The following statement was labeled non-hateful by 50% annotators: this nigger calling me juicy lips over the phone wtf . Is the given statement hateful?	0	yes
The following statement was labeled non-hateful by 50% annotators: a nigger bich will never have strait hair so keep wearing dat horsehair weave . Is the given statement hateful?	0	yes
The following statement was labeled non-hateful by 50% annotators: apparently some vile nigger animals kidnapped a white special needs teen and tortured and scalped him while shouting fuck white people fuck trump are you being armed and are you shooting in the head when these zombies approach . Is the given statement hateful?	0	yes
The following statement was labeled non-hateful by 50% annotators: <user> you need potassium eat a banana you fucking nigger . Is the given statement hateful?	0	yes
The following statement was labeled non-hateful by 50% annotators: well then send some coon estrogen to my wife she turning more liberal breath by breath due to fake news i do not know how much more i can take hell between her and my two daughters hormones i have started growing breast tissue like pseudo naturally becoming bruce jenner . Is the given statement hateful?	0	no
The following statement was labeled non-hateful by 50% annotators: it high time we hindus should think that these filthy muslims should be allowed to live here or not kamleshtiwari ypg yourprophetisgay . Is the given statement hateful?	0	yes
The following statement was labeled non-hateful by 50% annotators: <user> why should you ban immigrants from operating small business every business start somewhere and tomorrow that will give people job . Is the given statement hateful?	1	non-hateful
The following statement was labeled non-hateful by 50% annotators: i guess this nigger and his mudshark are unaware of the merchant this is some hilarious trolling . Is the given statement hateful?	0	yes
The following statement was labeled non-hateful by 50% annotators: the pentagon is like a street nigger constantly bumming cigarettes spare change . Is the given statement hateful?	0	yes
The following statement was labeled non-hateful by 50% annotators: the nigger is a true snake charmer . Is the given statement hateful?	0	yes
The following statement was labeled non-hateful by 50% annotators: they all look like dykes too i am sure that just a coincidence . Is the given statement hateful?	0	no
The following statement was labeled non-hateful by 50% annotators: ben is cool but he is still a nigger . Is the given statement hateful?	0	yes
The following statement was labeled non-hateful by 50% annotators: imagine the riots if people actually got food boxes instead of ebt cards every ghetto in america would look like ferguson . Is the given statement hateful?	0	non-hateful
The following statement was labeled non-hateful by 50% annotators: first save your white bitches from sucking so many black cocks and giving birth to mixed babies i am not the one threatening your existence you retarded degenerate . Is the given statement hateful?	0	yes
The following statement was labeled non-hateful by 50% annotators: i think it worse than that it is almost like the campaign to legalise homosexuality in the early <number> they are wanting to make it normal it only took the queers until about <number> . Is the given statement hateful?	0	non-hateful
The following statement was labeled non-hateful by 50% annotators: nigger males are faggots on the down low another reason why aids figures so prominently in their ethnic grouping only the least desirable of white women settle for muh dick these women have either low self esteem daddy issues and or low iq a deadly combination for white women <user> . Is the given statement hateful?	0	yes
The following statement was labeled non-hateful by 50% annotators: ah k white nationalism is perfect and infallible and you are a cuck faggot who takes it up the ass from blacks if you disagree in any way that seems to cover it . Is the given statement hateful?	0	yes
The following statement was labeled non-hateful by 50% annotators: lol trump is gutting that nigger bitch like a carp . Is the given statement hateful?	0	yes
The following statement was labeled non-hateful by 50% annotators: <user> what about us white arabs . Is the given statement hateful?	1	non-hateful
The following statement was labeled non-hateful by 50% annotators: bitch you white nigga is a faggot your kids are demon possessed over blk ppl your pussy is worthless you are a whore you and ur household all suck the same dick you are jealous of innocent blk ppl you are a squatter in blk neighborhoods you are jealous of jesus ur disgusting . Is the given statement hateful?	0	yes
The following statement was labeled non-hateful by 50% annotators: not wanting to leave the house due to equal parts depression and not wanting to acknowledge the existence of all the ignorant sister banging idiotic fucking redneck pieces of garbage that live in this shitheel podunk white trash map stain i live in . Is the given statement hateful?	0	yes
The following statement was labeled non-hateful by 50% annotators: the attention whore will kill canadians just to gain a seat on the moslem run un . Is the given statement hateful?	0	yes
The following statement was labeled non-hateful by 50% annotators: bare naked islam brought to you by the bare naked ladies . Is the given statement hateful?	0	no
The following statement was labeled non-hateful by 50% annotators: <user> oh and there the gay rainbow flag these are not women they are mostly lesbians irrelevant termagants with empty wombs . Is the given statement hateful?	0	yes
The following statement was labeled non-hateful by 50% annotators: you was supposed to be my bestfriend like yanno someone i could vent to spend time with share secrets with type shit someone i can call on and they be there when i need em but bitch you only hmu for one thang fuck youu 🖕 🏽 fuckin faggot . Is the given statement hateful?	0	yes
The following statement was labeled non-hateful by 50% annotators: that sound you hear in the distance is the 2 nd civil war approaching texas state student paper ran a pro white genocide article ontologically speaking white death will mean liberation for all … until then remember this i hate you because you should not exist . Is the given statement hateful?	0	yes
The following statement was labeled non-hateful by 50% annotators: meanwhile little girls are sold in refugee camps where imported men then claim to be their fathers they are only raped and subjected to fgm and slavery but dare <user> find a moral obligation to call that out and strike against it why do not those children matter enough . Is the given statement hateful?	1	no
The following statement was labeled non-hateful by 50% annotators: what a fucking nigger fag pantload i wonder who actually wrote that for this affirmative action push along toy . Is the given statement hateful?	0	yes
The following statement was labeled non-hateful by 50% annotators: only when middle school girls drive dykes to the nuthouse underage shitskin rapists get their ids protected . Is the given statement hateful?	0	yes
The following statement was labeled non-hateful by 50% annotators: it true <user> ‍ is a faggot 🙂 . Is the given statement hateful?	0	yes
The following statement was labeled non-hateful by 50% annotators: ugly commie bull dyke cunt . Is the given statement hateful?	0	yes
The following statement was labeled non-hateful by 50% annotators: wow go figure once again the placed crowd at new year rockin eve is mainly chinks niggers beaners muslims kikes dykes faggots and chicks with dicks . Is the given statement hateful?	0	yes
The following statement was labeled non-hateful by 50% annotators: why do not you respond to my posts you white nigger lying sack of shit i called you out for being a fed <number> days before you published it on your website faggot <user> ‍ . Is the given statement hateful?	0	yes
The following statement was labeled non-hateful by 50% annotators: <user> tell us first who are these white supremacists how do we know that you are not one of them . Is the given statement hateful?	1	non-hateful
The following statement was labeled non-hateful by 50% annotators: the kike shill psyop ricky vaughn has deleted his post where he stated white identity does not exist so i will post the screen shot here now ask ricky tkr get gassed faggot . Is the given statement hateful?	0	yes
The following statement was labeled non-hateful by 50% annotators: worst case he looking at a path to citizenship for the ones who are not violent felons and who meet the criteria that would entitle a legal immigrant to be here under a merit based system <number> <number> . Is the given statement hateful?	1	non-hateful
The following statement was labeled non-hateful by 50% annotators: this is atrocious fuck this nigger bitch . Is the given statement hateful?	0	yes
The following statement was labeled non-hateful by 50% annotators: hell yeah proof that the anti q trolls here are fake alt right kike dick suckers . Is the given statement hateful?	0	yes
The following statement was labeled non-hateful by 50% annotators: nice ghetto rims faggot . Is the given statement hateful?	0	yes
The following statement was labeled non-hateful by 50% annotators: bro i swear to god i fucking hate white girls you little ugly ass maggots . Is the given statement hateful?	0	yes
The following statement was labeled non-hateful by 50% annotators: be good for you to knock off promoting the fictional kike faggot jesus christ insanity perversion in general . Is the given statement hateful?	0	yes
The following statement was labeled non-hateful by 50% annotators: omfg they are still repeating the fake news that the killer was a white supremacist 🤣 <user> ‍ he hurled slurs at blacks and muslims and according to the anti defamation league had ties to white supremacists . Is the given statement hateful?	1	non-hateful
The following statement was labeled non-hateful by 50% annotators: filthy jet black nigga backstage full of white bitches no i do not sell like macklemore but i have got white privilege . Is the given statement hateful?	0	yes
The following statement was labeled non-hateful by 50% annotators: feminism has not set women free it has robbed them of their dignity their femininity gabfam gab . Is the given statement hateful?	1	yes
The following statement was labeled non-hateful by 50% annotators: if i hear the phrase white privilege one more time i am going to opt to come back in my next life as a black hispanic latino illegal muslim jewish faggot feminist queer gay lesbian dike transgender piece of shit in other words everything i have not been in this life . Is the given statement hateful?	0	yes
The following statement was labeled non-hateful by 50% annotators: you are a dumb spic that can not spell spaniard . Is the given statement hateful?	0	yes
The following statement was labeled non-hateful by 50% annotators: two bros chillin in a hot tub five feet apart cus they are not gay . Is the given statement hateful?	1	no
The following statement was labeled non-hateful by 50% annotators: niggaz was fat in the good old days and they usually died of heartattacks by fitty from crack cocaine and chasing white women dat nigger found jesus and a guru . Is the given statement hateful?	0	yes
The following statement was labeled non-hateful by 50% annotators: since <number> shitlibs have said that if only there were a few 5 0 iq moslem janitors at the world trade centers moslems would not have attacked it we have a refusegee problem before libya breivik understood you do not shoot the water coming into the boat but those drilling holes in the hull . Is the given statement hateful?	0	yes
The following statement was labeled non-hateful by 50% annotators: how do we deal with mudslime baedophiles . Is the given statement hateful?	0	yes
The following statement was labeled non-hateful by 50% annotators: ever notice how these women resemble each other . Is the given statement hateful?	1	non-hateful
The following statement was labeled non-hateful by 50% annotators: <user> snerfbucket ima try call me nigger . Is the given statement hateful?	0	yes
The following statement was labeled non-hateful by 50% annotators: watching <number> minutes and the lawlessness of nigger hood rats the chicago police dept have given up result <percent> increase in homicides . Is the given statement hateful?	0	yes
The following statement was labeled non-hateful by 50% annotators: it the natural order in apfrica and the me for the men to literally sit around and have the women do the work look at any coffee shop in minneapolis or other cities infested by zoomalis bantus or arabs and you will see it . Is the given statement hateful?	0	no
The following statement was labeled non-hateful by 50% annotators: the jews the comies the nigz the muzzies . Is the given statement hateful?	0	yes
The following statement was labeled non-hateful by 50% annotators: shock as nigger turns out to be a nigger . Is the given statement hateful?	0	yes
The following statement was labeled non-hateful by 50% annotators: says the swamp muzzie who fucks goats . Is the given statement hateful?	0	yes
The following statement was labeled non-hateful by 50% annotators: white people need to start caring about their own kind instead of bending over backwards for every jigaboo savage that would gladly kill them for fun or for their cell phone . Is the given statement hateful?	0	yes
The following statement was labeled non-hateful by 50% annotators: what a choice the cucknadians must choose between a retarded asshole globalist crypto muslim puppet or a communist parasite either way cucknada is fucked . Is the given statement hateful?	0	yes
The following statement was labeled non-hateful by 50% annotators: any urgent questions in parliament today about telford do not be such nervous nelly paki moslem child rape gangs are just part parcel etc etc . Is the given statement hateful?	0	yes
The following statement was labeled non-hateful by 50% annotators: you all faggot ads niggas keep trying to sabotage my work b bitch ass poppies and jehovah witnesses do not control what i make fuck your mother fuck abc news too and the bitch ads tech assholes . Is the given statement hateful?	0	yes
The following statement was labeled non-hateful by 50% annotators: <user> i agree it is a very high chance this is a white person saying it . Is the given statement hateful?	1	non-hateful
The following statement was labeled non-hateful by 50% annotators: meek and mild c mon don call him what he is a faggot . Is the given statement hateful?	0	yes
The following statement was labeled non-hateful by 50% annotators: lesson of the week from the holy book the sovereign individual once commerce flows over the internet suppression of speech becomes unstoppable devolution inevitable and the monopoly of violence by governments will end paraphrased from j d davidson rhys mogg . Is the given statement hateful?	1	non-hateful
The following statement was labeled non-hateful by 50% annotators: watch bbc on muslims abandoning eu <number> syria the father honestly says it bcs they do not like girls being told they have freewill by supposedly educated pple bcs women don t in islam sharia sharialaw realitycheck fgm misogyny hijab rapeculture abuse violence woman women girl girls womansrights womensrights brexit . Is the giv…	1	non-hateful
The following statement was labeled non-hateful by 50% annotators: the parade needed at least one severed head in honor of muslim culture . Is the given statement hateful?	0	yes
The following statement was labeled non-hateful by 50% annotators: i look at the mudslime news from europe and think i wish some goat fucker would try that shit down here in louisiana just get within <number> feet of my daughters and thats your life over checkout time mohammed . Is the given statement hateful?	0	yes
The following statement was labeled non-hateful by 50% annotators: claire balding i know you can be raped by some niggas you dyke . Is the given statement hateful?	0	yes
The following statement was labeled non-hateful by 50% annotators: <user> <user> i witnessed my black teammates defend and agree with my overtly racist white friend for calling a black dude a nigger i tried to defend dude being called nigger and they all hated on me . Is the given statement hateful?	1	non-hateful
The following statement was labeled non-hateful by 50% annotators: also that he a faggot and serial mudshark . Is the given statement hateful?	0	yes
The following statement was labeled non-hateful by 50% annotators: <user> welcome aboard we are a land of refugees from the p c culture that only p c when they want to be . Is the given statement hateful?	1	non-hateful
The following statement was labeled non-hateful by 50% annotators: <user> <user> <user> <user> <user> <user> <user> white people fought and suffered for your ancestors freedom . Is the given statement hateful?	1	non-hateful
The following statement was labeled non-hateful by 50% annotators: phoebe bridgers is a sociopath . Is the given statement hateful?	1	non-hateful
The following statement was labeled non-hateful by 50% annotators: me and <user> were talking about it cosplayers and she was like if this richie cosplayer took off their glasses they would look like mike but theyre white stranger things . Is the given statement hateful?	1	non-hateful
The following statement was labeled non-hateful by 50% annotators: <user> how can rbi put such limits this has to change and make culprits pay for it must stop harassment of depositors . Is the given statement hateful?	1	non-hateful
The following statement was labeled non-hateful by 50% annotators: sure nigger loving whore sure . Is the given statement hateful?	0	yes
The following statement was labeled non-hateful by 50% annotators: um lazy stupid nigger savages . Is the given statement hateful?	0	yes
The following statement was labeled non-hateful by 50% annotators: trump scumbag former spic advisor just pushed for daca amnesty daca amnesty is war . Is the given statement hateful?	0	yes
The following statement was labeled non-hateful by 50% annotators: anti white feminist is attacked by a violent shitskin and promptly blames white men for not saving her she does not blame the shitskin instead says he just needs help and pity oh did i mention she jewish how shocking . Is the given statement hateful?	0	yes
The following statement was labeled non-hateful by 50% annotators: <user> it not like i am called a faggot due to my long hair and feminine tendencies a lot but hey being a tall white woman is hard as fuck amiright . Is the given statement hateful?	1	no
The following statement was labeled non-hateful by 50% annotators: the boomer toughguy became my object of general loathing after observing one on a train casually interacting with a sulking sheboon and going out of his way to call her ma am one obsequious instance after another . Is the given statement hateful?	0	yes
The following statement was labeled non-hateful by 50% annotators: shockingly though western pakis and indians get along quite well even though we are suppose to hate each other i personally do not have any paki friends because majority of them hate this country are anti semites and <number> <number> conspiracy theorists . Is the given statement hateful?	1	non-hateful
The following statement was labeled non-hateful by 50% annotators: real niggas only you pussy faggots . Is the given statement hateful?	0	yes
The following statement was labeled non-hateful by 50% annotators: fuck that nasty bitch with a moslem dick . Is the given statement hateful?	0	yes
The following statement was labeled non-hateful by 50% annotators: not a single peep from racist nigger obama nor vapid cunt hillary nor heeb bernie fuck you . Is the given statement hateful?	0	yes
The following statement was labeled non-hateful by 50% annotators: but one of them is a nigger . Is the given statement hateful?	0	yes
The following statement was labeled non-hateful by 50% annotators: be careful with thoes people who always joking around and can not never be serious . Is the given statement hateful?	1	non-hateful
The following statement was labeled non-hateful by 50% annotators: right away the nigger goes to muh dik should be legal to decorate the city lampposts with these stupid animals . Is the given statement hateful?	0	yes
The following statement was labeled non-hateful by 50% annotators: heejin hyunjin gay date while singing abt boys love that . Is the given statement hateful?	1	non-hateful
The following statement was labeled non-hateful by 50% annotators: you know what sicker if even possible than that happened to the white kid kidnapped in chicago is that some sick fucking people see it for anything else than what it fucking is a brutal unacceptable hate crime fuck you people like don t lemon worst reporter in cnn in <number> . Is the given statement hateful?	1	yes
The following statement was labeled non-hateful by 50% annotators: ♫ after debris settles and the dust gets swept off young hwytes pick up where big a had left off right when kike magazines wrote the west off we used the internet for something better than to jack off ♫ . Is the given statement hateful?	0	no
The following statement was labeled non-hateful by 50% annotators: blacksketball is now owned by black rules first they put in the dunk then they stopped calling walking palming the ball carrying the ball and now the college refs are also calling ghetto playground basketball we need a new basketball league where white people again make the rules . Is the given statement hateful?	0	yes
The following statement was labeled non-hateful by 50% annotators: especially since he claims he is a gay man . Is the given statement hateful?	1	non-hateful
The following statement was labeled non-hateful by 50% annotators: bears last lmaoo niggas team tho . Is the given statement hateful?	1	yes
The following statement was labeled non-hateful by 50% annotators: i am not surprised that boris johnson made it to the list but surprised that our <number> inch guy somehow has no sexual harassment complaint against him or have i been sleeping go back modi me too . Is the given statement hateful?	1	no
The following statement was labeled non-hateful by 50% annotators: <user> yeah while i do not agree with horrible acts of violence angela is taking revenge as a queer person on these horrible bullies especially the pedo carelessly there for shock sure but also early 8 0 was much different rape and revenge movies were still look at as empowering . Is the given statement hateful?	1	non-hateful
The following statement was labeled non-hateful by 50% annotators: gab is a closed social network it is impossible to see any posts without registering first as such it is good for echo chamber but unusable for propaganda or making any statement this has to change otherwise it ll turn into an information ghetto or reservation for right wingers . Is the given statement hateful?	1	non-hateful
The following statement was labeled non-hateful by 50% annotators: whoever posts the fucking spoilers for endgame is catching these fucking hands . Is the given statement hateful?	1	no
The following statement was labeled non-hateful by 50% annotators: haredi none haredi jews have similar low math scores ashkenazi make up <number> of israel population so nope ashkenazi arent the exception all jews are hybrid mongerels jews are all low i q sand niggers there are no exceptions . Is the given statement hateful?	0	hateful
The following statement was labeled non-hateful by 50% annotators: adios nigger lover . Is the given statement hateful?	0	yes
The following statement was labeled non-hateful by 50% annotators: <user> that ’ pretty gay bro . Is the given statement hateful?	1	non-hateful
The following statement was labeled non-hateful by 50% annotators: deport his unfunny fat kike ass back to canadastan make america funny again . Is the given statement hateful?	0	yes
The following statement was labeled non-hateful by 50% annotators: white sharia is shit we are not muslims and do not want to be fuck of with that retarded idea . Is the given statement hateful?	0	yes
The following statement was labeled non-hateful by 50% annotators: race is a social construct goy no difference see how beautiful all women are nsfw . Is the given statement hateful?	1	non-hateful
The following statement was labeled non-hateful by 50% annotators: <user> and exactly how many of those muslim countries are ready to accept the muslim refugees . Is the given statement hateful?	1	non-hateful
The following statement was labeled non-hateful by 50% annotators: what a muslim does in the privacy of his own goat is disgusting better not put a picture here try not to imagine one either . Is the given statement hateful?	0	yes
The following statement was labeled non-hateful by 50% annotators: yeah you are filthy little bone smoking kike . Is the given statement hateful?	0	yes
The following statement was labeled non-hateful by 50% annotators: behind the rohinya muzzie sob story http :// <url> . Is the given statement hateful?	0	non-hateful
The following statement was labeled non-hateful by 50% annotators: that is just too retarded even by nigger standards . Is the given statement hateful?	0	yes
The following statement was labeled non-hateful by 50% annotators: i visited in that trip eng irl scotland saw ancient everything they are time itself i think maybe that why i get impatient about how they are allowing the muzzies destroy the place so rich in culture and historic timelessness europe is a living museum and should be respected as such . Is the given statement hateful?	0	no
The following statement was labeled non-hateful by 50% annotators: no more of this madness i shall take refugee in a bottle . Is the given statement hateful?	1	non-hateful
The following statement was labeled non-hateful by 50% annotators: it like <number> <number> points above american whites in japan and south korea tbh but this is what happens when hostile aliens control your country watch out if you are eyeing south korea though since the importation of jungle asians and poo in the loos is occurring on the downlow . Is the given statement hateful?	0	yes
The following statement was labeled non-hateful by 50% annotators: <user> <user> that india one day ll be a muslim country again and muslims ll occupy india and yes we ll give rights to minorities do not worry we ll make india as a muslim country one day . Is the given statement hateful?	1	non-hateful
The following statement was labeled non-hateful by 50% annotators: niggers dindu and do not do nuffin these apes are beyond just obsolete farm equipment oh and this don lemon monkey is a faggot too <user> . Is the given statement hateful?	0	yes
The following statement was labeled non-hateful by 50% annotators: the white bitch amber guyger has been locked away . Is the given statement hateful?	1	yes
The following statement was labeled non-hateful by 50% annotators: lol gross as fuck seriously dont post that shit i cant stand sand nigger chicks i will have to unfollow if you do . Is the given statement hateful?	0	yes
The following statement was labeled non-hateful by 50% annotators: fox news is so desperate to change subject they are now talking about how robert de niro got upset waiting for his ride and how full of white privilege he is and oh how he used to be a good actor wow pitiful wtf tucker . Is the given statement hateful?	1	no
The following statement was labeled non-hateful by 50% annotators: yeah if you do not support my corrupt multiculti globo homo military run by a corrupt government controlled by jews then you have no balls brilliant . Is the given statement hateful?	0	yes
The following statement was labeled non-hateful by 50% annotators: if it had been a shitskin goatfucker from the mosque do you think they would have arrested him nope . Is the given statement hateful?	0	yes
The following statement was labeled non-hateful by 50% annotators: the only kike here is you . Is the given statement hateful?	0	no
The following statement was labeled non-hateful by 50% annotators: black ppl who went to all white schools become annoying ass adults 😂 😂 😂 😂 . Is the given statement hateful?	1	yes
The following statement was labeled non-hateful by 50% annotators: failed moslem terrorists do not get any virgins just arse raped for eternity by big dindu nuffins with bars of soap they only use for the occasion . Is the given statement hateful?	0	yes
The following statement was labeled non-hateful by 50% annotators: why do we allow any moslem filth brought here to begin with we have a right as a sovereign nation to disallow anyone we deem unworthy to be an american from coming here . Is the given statement hateful?	0	yes
The following statement was labeled non-hateful by 50% annotators: <user> <user> all white men do is lie and colonize nothing else . Is the given statement hateful?	1	hateful
The following statement was labeled non-hateful by 50% annotators: <user> yeah there all nazis . Is the given statement hateful?	1	non-hateful
The following statement was labeled non-hateful by 50% annotators: <user> except for the illegally part sounds like that is the explanation based on what happens when they go to court where white cops dealing with black people in the us are concerned nothing is illegal . Is the given statement hateful?	1	non-hateful
The following statement was labeled non-hateful by 50% annotators: i hate these faggots 🤷 🏾 ‍ ♂️ . Is the given statement hateful?	0	yes
The following statement was labeled non-hateful by 50% annotators: btw can i just say voting in washington is a fucking dream every state should do this . Is the given statement hateful?	1	non-hateful
The following statement was labeled non-hateful by 50% annotators: it used to be associating with jews meant you had a good accountant or doctor and an extra dinner party to mark on the calendar now it means fbi raids bdsm perversion soiled potted plants and deep state coup attempts how the chosen have fallen . Is the given statement hateful?	1	non-hateful
The following statement was labeled non-hateful by 50% annotators: <user> <user> i gotta go right there just something about white ass cheeks that drives me crazy . Is the given statement hateful?	1	yes
The following statement was labeled non-hateful by 50% annotators: the american women in service are waiting for the call to deploy . Is the given statement hateful?	1	non-hateful
The following statement was labeled non-hateful by 50% annotators: i think at this point it better to just have a set day like every 1 2 th or something so people do not get confused like how we do with blackout you all really should be taking notes from the niggers . Is the given statement hateful?	0	yes
The following statement was labeled non-hateful by 50% annotators: makes me want to puke so fucking tired of this moslem shite appeasement . Is the given statement hateful?	0	yes
The following statement was labeled non-hateful by 50% annotators: well it sleeping beauty they plan to rewrite first cause she never gave consent to be kissed by the prince the left are seriously fucked in the head and if the bbc show it i am sure she will be a black moslem like thor was . Is the given statement hateful?	1	yes
The following statement was labeled non-hateful by 50% annotators: <user> i hate you . Is the given statement hateful?	1	yes
The following statement was labeled non-hateful by 50% annotators: lmao this snow nigger is fuming so hard he brought out his ebonics 😂 🤣 😂 🤣 😂 🤣 😂 😂 😂 🤣 😂 🤣 lol this is your future daughters homeboi . Is the given statement hateful?	0	yes
The following statement was labeled non-hateful by 50% annotators: <user> initially misread this as him wearing a dindu nuffin shirt . Is the given statement hateful?	1	non-hateful
The following statement was labeled non-hateful by 50% annotators: lmao insert some attempt a insult that only works w new right kike worshipping cerno dick sucking gorilla vox pedo faggots . Is the given statement hateful?	0	yes
The following statement was labeled non-hateful by 50% annotators: still the same nigga i am evolving doe . Is the given statement hateful?	1	yes
The following statement was labeled non-hateful by 50% annotators: i want to go back to school and get an education but i am poor and colleges are kike rip offs i am not satisfied with where i am in life and honestly have no clue where or how to start pushing forward . Is the given statement hateful?	0	yes
The following statement was labeled non-hateful by 50% annotators: i would repatriate all mongoloid negroids if i had the power at this very moment giving each negroid and mongoloid as many jews as they wanted as slaves as an incentive to leave until all of them were gone . Is the given statement hateful?	0	no
The following statement was labeled non-hateful by 50% annotators: when i see a nigger bich i do not see a woman i see a turd wit a brillohaid . Is the given statement hateful?	0	yes
The following statement was labeled non-hateful by 50% annotators: these nigger biches look like aunt jemima . Is the given statement hateful?	0	yes
The following statement was labeled non-hateful by 50% annotators: acts <number> <number> generation see st luke <time> for if god comes right now immediately he will find that the white devil people are virtually literally spiritually running rampant like loose cannons running helter skelter everywhere like chickens with their heads removed . Is the given statement hateful?	1	no
The following statement was labeled non-hateful by 50% annotators: they either pick the gimmick light skin bitch or the white boy to profit off of and it never works . Is the given statement hateful?	1	yes
The following statement was labeled non-hateful by 50% annotators: anything they say is a lie nigger just means black only blax use it becasue whites do not give a fuck about blax they just like controlling whites . Is the given statement hateful?	0	yes
The following statement was labeled non-hateful by 50% annotators: hey yankees can you please stop to associate flamenco with arabs to associate rumba with black music to associate pre colombians with latinos to pretend that africa is in orient to pretend that you are pioneers when you are colons thanks . Is the given statement hateful?	1	no
The following statement was labeled non-hateful by 50% annotators: <user> completely respectable ladies can enjoy a couple of honky tonks and some beverages nothing wrong with that <wink> . Is the given statement hateful?	1	non-hateful
The following statement was labeled non-hateful by 50% annotators: <user> <user> everybody knows that the demo bot plan in <number> is massive illegal alien voter fraud operation too big to recount 2020 and that the mcimpeachment is just intended to make the illegal aliens mcangry enough to mcvote jedi mind trick no workee oops . Is the given statement hateful?	1	no
The following statement was labeled non-hateful by 50% annotators: seen some niggas walking outside smoking a hookah they some fiens . Is the given statement hateful?	1	yes
The following statement was labeled non-hateful by 50% annotators: long dead redneck friend of mine when discussing basketball said i have never seen a nigger run so fast unless he had a tv under each arm . Is the given statement hateful?	0	yes
The following statement was labeled non-hateful by 50% annotators: can not stop thinking about the gay rats from arthur i hope they had a good honeymoon . Is the given statement hateful?	1	non-hateful
The following statement was labeled non-hateful by 50% annotators: joe biden own words are proof that the left resorts to violence when they do not like something said by others that the tolerant left for you from a legal standpoint nonthreatening words are never justification for assault battery . Is the given statement hateful?	1	non-hateful
The following statement was labeled non-hateful by 50% annotators: <user> they robbed them while serving looks too and they robbed the brooklyn museum tbh more shows should be about queer people stealing from white cishet institutions . Is the given statement hateful?	1	non-hateful
The following statement was labeled non-hateful by 50% annotators: again why are you so defensive about it is some nazi gonna come in and call you a name so what i have been called nigger more times than i can count . Is the given statement hateful?	1	yes
The following statement was labeled non-hateful by 50% annotators: goodnight nigger lover lover . Is the given statement hateful?	0	yes
The following statement was labeled non-hateful by 50% annotators: wait other single people exist you mean not every gay person is taken 😱 . Is the given statement hateful?	1	non-hateful
The following statement was labeled non-hateful by 50% annotators: they are called liberals and we are called nazis by the msm mediacrats misapplication of terms began in 1 9 6 0 during vnw weathermen underground communists bill ayers and his bitch bernadine dohrn who schooled frank marshall davis son obama fathered with a mudshark porn hoe . Is the given statement hateful?	0	yes
The following statement was labeled non-hateful by 50% annotators: i want to jimmy kimmel to do one of those ate kids halloween candy videos but instead of halloween candy challenge suburban white parents to call <number> black kids that knock on their door niggers . Is the given statement hateful?	0	yes
The following statement was labeled non-hateful by 50% annotators: definition from fr muslim this from persian mosolmān or moslemān pl of moslem and this of the ar clás muslim <number> adj who professes islamism ‖ religion of muhammad u t c <number> adj . Is the given statement hateful?	1	non-hateful
The following statement was labeled non-hateful by 50% annotators: <user> soo like is she a nazi . Is the given statement hateful?	1	non-hateful
The following statement was labeled non-hateful by 50% annotators: hugs each amp every akkian out there maa hod di salgay fans ki sonagachi ki item salman . Is the given statement hateful?	1	non-hateful
The following statement was labeled non-hateful by 50% annotators: me saying that i will partake in inktober is a fucking lie i do not have the time focus or energy sometimes so i will doodle some bullshit and maybe make them into full drawings . Is the given statement hateful?	1	no
The following statement was labeled non-hateful by 50% annotators: kikes are the real problem pay all refugees and muslims to leave for uk and france . Is the given statement hateful?	0	hateful
The following statement was labeled non-hateful by 50% annotators: that nigga ynw melly never getting released . Is the given statement hateful?	1	yes
The following statement was labeled non-hateful by 50% annotators: <user> <user> <user> not we love america and tanding tall with straight spines unlike the maga who defend treason corruption dictatorship cover ups murder white supremacy misogyny racism homophobia and the list goes on good always wins in the end . Is the given statement hateful?	1	yes
The following statement was labeled non-hateful by 50% annotators: <user> just the jews you fucking kike . Is the given statement hateful?	0	yes
The following statement was labeled non-hateful by 50% annotators: is muhummad muslim or islam . Is the given statement hateful?	1	non-hateful
The following statement was labeled non-hateful by 50% annotators: <user> fuck you and die you fuckin lezzie nigger white hating cunt . Is the given statement hateful?	0	yes
The following statement was labeled non-hateful by 50% annotators: <user> <user> <user> they are the best man the ultimate muslim shoe white ones are doubly good reflective ones triply . Is the given statement hateful?	1	non-hateful
The following statement was labeled non-hateful by 50% annotators: my grandson a homosexual and i love him i love my big gay grandson . Is the given statement hateful?	1	non-hateful
The following statement was labeled non-hateful by 50% annotators: <user> i d be interested in the role of ship queer if it still going is homosexuality essential though i have never been one although i have transferable skills . Is the given statement hateful?	1	non-hateful
The following statement was labeled non-hateful by 50% annotators: no do not lie these shithole are great places for niggers and spics and arabs to live they all will be happy together without wypipo . Is the given statement hateful?	0	yes
The following statement was labeled non-hateful by 50% annotators: everyone wants to be nct everyone the entirety of kpop if they dont wanna be niggers they wanna be nct . Is the given statement hateful?	0	yes
The following statement was labeled non-hateful by 50% annotators: my personal emotion fueled opinion is if you see a sexual assault on campus knock them out professionally i say make sure you do what you can to make sure you do what you can to make sure these creeps are identifiable because violence only begets violence . Is the given statement hateful?	1	non-hateful
The following statement was labeled non-hateful by 50% annotators: theresa may treason has no limit as she appoints sajid javid home sec in charge of uk security police immigration a moslem of pakistani origin civil war seems to be the only route . Is the given statement hateful?	1	no
The following statement was labeled non-hateful by 50% annotators: did i say soley you disingenuous kike rat i said <percent> and it would be better without your <percent> plus the other former <percent> thanks kikes for crankung rhat up to <percent> . Is the given statement hateful?	0	yes
The following statement was labeled non-hateful by 50% annotators: u notice people like <user> are not too eager at exploring or talk abt the jewish and israeli connections the evidence for which there is plenty dancing israelis truck bomb jews urban moving systems jews suter wtc lease ring jews gelatine art students etc etc just arabs arabs arabs . Is the given statement hateful?	0	no
The following statement was labeled non-hateful by 50% annotators: <user> the edmund fitzgerald leaves for canada tomorrow morning all muzzies are welcome and it is free . Is the given statement hateful?	0	non-hateful
The following statement was labeled non-hateful by 50% annotators: as long as you gettin money yo bitch don ’ t care if you don ’ t go out . Is the given statement hateful?	1	yes
The following statement was labeled non-hateful by 50% annotators: that towel head is a dude i am almost sure i just threw up in my mouth a little . Is the given statement hateful?	0	yes
The following statement was labeled non-hateful by 50% annotators: imagine if there wasn t oil in the middle east there would be no dubais there would be no wealthy towel headed sand nigger ruling class because of oil muslim goat fckrs oops i meant herders get to hide in plain sight now they intend to take over the u.s. . Is the given statement hateful?	0	yes
The following statement was labeled non-hateful by 50% annotators: fakenews is following hillary example blame everyone else for causing the violence even though they say kill and fight in their articles bye bye fake guys . Is the given statement hateful?	1	no
The following statement was labeled non-hateful by 50% annotators: this is a fucking wild night this is why i hate having adrenaline rushes haldhladslas . Is the given statement hateful?	1	no
The following statement was labeled non-hateful by 50% annotators: i bet overtly was invented by jews 🖕 😡 🖕 . Is the given statement hateful?	1	non-hateful
The following statement was labeled non-hateful by 50% annotators: interesting stuff i will not lie with all the current talk of some blacks wanting to re segregate it hard to argue against most people think a militia enforced instant segregation when they hear the term white nationalism and that enforcement with violence is what scares them . Is the given statement hateful?	1	non-hateful
The following statement was labeled non-hateful by 50% annotators: no but mestizo spic sure is . Is the given statement hateful?	0	no
The following statement was labeled non-hateful by 50% annotators: why are only white nations being invaded buy non white immigrants . Is the given statement hateful?	1	non-hateful
The following statement was labeled non-hateful by 50% annotators: that his sister sheboon friend melissa is apparently dating some blonde dude . Is the given statement hateful?	0	non-hateful
The following statement was labeled non-hateful by 50% annotators: in the <number> <number> zipper head and slope were pretty fashionable i do believe they covered the gambit of asians . Is the given statement hateful?	1	non-hateful
The following statement was labeled non-hateful by 50% annotators: have been suspended four times by twitter always when content said something re moslems but truth also seeing that second largest shareholder is a moslem prince alwaleed bin talal bin abdulaziz alsaud not surprising so have drifted into gab ai for a better time and no moslem appeasement hope . Is the given statement hateful?	1	non-hateful
The following statement was labeled non-hateful by 50% annotators: incredible how asians have been turning to shitlib ideologies they are traditionally bulwarks of confucian law order disgusting they should be executed . Is the given statement hateful?	0	yes
The following statement was labeled non-hateful by 50% annotators: if i remember correctly your only concern was how to find naked pictures of the women in the picture i am sure by that comment your a real genius . Is the given statement hateful?	1	non-hateful
The following statement was labeled non-hateful by 50% annotators: you guys in germany and us men here in america too we are gonna have to man up and be crusaders this musloid bullshit is totally unacceptable . Is the given statement hateful?	0	yes
The following statement was labeled non-hateful by 50% annotators: that poor guy fucking mixer nigger grand kids that as bad as that fucking moron trump with his mixer jew grand kids . Is the given statement hateful?	0	yes
The following statement was labeled non-hateful by 50% annotators: my family owned <number> but we also fought for the union i really wish they would make a real proposal for reparations at some point i would not be able to contain myself if once everything was calculated every nigger got like <money> 😂 . Is the given statement hateful?	0	no
The following statement was labeled non-hateful by 50% annotators: despite living in the same american neighborhood for decades i somehow managed to move to a muslim country i base this on having gone food shopping today in a store over run with hijab clad terrorists . Is the given statement hateful?	0	no
The following statement was labeled non-hateful by 50% annotators: four moslem mp have been sent suspicious packages their acting like its something to worry about they need to chill out its just parcel parcel of life in a multicultural shit hole i am sure mayor khan would agree inshallah . Is the given statement hateful?	1	yes
The following statement was labeled non-hateful by 50% annotators: ass in the air lodi take every inch of depravity your masters want to give you take it all ya lil faggot btw the 1 st amendment applies to everyone not just thin skinned boomer queers and leftists you do not like gab 🐸 gtfo . Is the given statement hateful?	0	yes
The following statement was labeled non-hateful by 50% annotators: <user> nigger nigger nigger . Is the given statement hateful?	0	yes
The following statement was labeled non-hateful by 50% annotators: <user> should have been removed the last time he threatened this but making laws against people brown people black people gay people female people sick people poor people homeless people refugee people is more important than protecting our democracy of the people <user> . Is the given statement hateful?	1	non-hateful
The following statement was labeled non-hateful by 50% annotators: from the zman take a ghetto tour through a place like baltimore and you see a world that should never exist in a western country less than a long lifetime ago it did not exist it was not allowed to exist by the people in charge . Is the given statement hateful?	0	non-hateful
The following statement was labeled non-hateful by 50% annotators: <user> <user> <user> no illegal aliens increase population not lower it and they work for low pay . Is the given statement hateful?	1	no
The following statement was labeled non-hateful by 50% annotators: <user> this excuse for a man that he is because he can not be a man is propangadizing the great people of color to violence against white including females such an embarrassment . Is the given statement hateful?	1	non-hateful
The following statement was labeled non-hateful by 50% annotators: so it turns out that nationalism is the supreme withcraft of the jews and freemasonry its that time when the rothchilds give the next step in creating their new world order also known as the jew world order . Is the given statement hateful?	0	yes
The following statement was labeled non-hateful by 50% annotators: i am still tryna see what hood a nigga false claim . Is the given statement hateful?	1	yes
The following statement was labeled non-hateful by 50% annotators: got a twitter account suspend so here i am nigger nigger nigger jews are duplicitous and you should not cuck for them . Is the given statement hateful?	0	yes
The following statement was labeled non-hateful by 50% annotators: and it important to tell them i love me a good queer story with a happy ending but i also love me a realistic story portraying childhood trauma and internal homophobia god . Is the given statement hateful?	1	non-hateful
The following statement was labeled non-hateful by 50% annotators: black violence is wildly out of proportion . Is the given statement hateful?	1	non-hateful
The following statement was labeled non-hateful by 50% annotators: so my iphone still thinks fuck is duck but it auto corrects hufflepuff with no issue <number> is gay af . Is the given statement hateful?	1	no
The following statement was labeled non-hateful by 50% annotators: i am a white nationalist who else is a white nationalist . Is the given statement hateful?	1	non-hateful
The following statement was labeled non-hateful by 50% annotators: hes a mohammaden just the same as every muslim in the world obeying the qur an . Is the given statement hateful?	1	non-hateful
The following statement was labeled non-hateful by 50% annotators: maybe ban the nazis before u wanna worry about me tweeting something for the thousandth time . Is the given statement hateful?	1	non-hateful
The following statement was labeled non-hateful by 50% annotators: muslim countries refusing to take in or help muslim refugees raises no outcry from the alt left liberal socialists but a temporary ban on travelling here from a known terror hotspot is inhumane fucktards . Is the given statement hateful?	0	yes
The following statement was labeled non-hateful by 50% annotators: where are the condemnations of violence against <number> kissimmee fl cops last night that left <number> dead hello media rinos democrats bluelivesmatter . Is the given statement hateful?	1	non-hateful
The following statement was labeled non-hateful by 50% annotators: my iq is a confirmed <number> points checkmate you ignorant faggots <user> . Is the given statement hateful?	0	yes
The following statement was labeled non-hateful by 50% annotators: u niggers r coonin for that kanye shit . Is the given statement hateful?	0	yes
The following statement was labeled non-hateful by 50% annotators: i did not watch that far i saw men in skirts got pissed and shut it off you know all the muzzies were standing around laughing their asses off at those dumb fucking cucktard faggots you know who doesn t wear skirts me . Is the given statement hateful?	0	yes
The following statement was labeled non-hateful by 50% annotators: clint eastwood is a conservative director i think he used to fuck a nigger though is used to fuck a nigger proper grammar i am having an appalachian moment . Is the given statement hateful?	0	yes
The following statement was labeled non-hateful by 50% annotators: wishing the happiest birthday to my favorite crackhead <user> love u bitch . Is the given statement hateful?	1	yes
The following statement was labeled non-hateful by 50% annotators: i call women love who i do not know all the time as you may have noted nothing sexual or demeaning meant just being friendly it is not a chat up line . Is the given statement hateful?	1	non-hateful
The following statement was labeled non-hateful by 50% annotators: <user> idubbz says nigger faggot all the time but no one actually gives him shit for it lol people are stupid as fuck . Is the given statement hateful?	1	yes
The following statement was labeled non-hateful by 50% annotators: fuck you all dykes . Is the given statement hateful?	0	yes
The following statement was labeled non-hateful by 50% annotators: do not blow your horn at me cuz you can not drive bitch . Is the given statement hateful?	1	yes
The following statement was labeled non-hateful by 50% annotators: <user> omg we ’ re so gay . Is the given statement hateful?	1	non-hateful
The following statement was labeled non-hateful by 50% annotators: blacktivists ignorantly demand that white people who do not and have not owned slaves need to pay reparations to black people who are not and have not been slaves how bout you just get jobs and pay for your own shit ghetto rats . Is the given statement hateful?	0	yes
The following statement was labeled non-hateful by 50% annotators: jews couch their distrust of whites as if it were a logical response to random violence that we routinely heap upon them because of our barbaric gentile ways the truth though is that they want us gone because we are the only ones who routinely oppose their nefarious schemes for domination . Is the given statement hateful?	1	non-hateful
The following statement was labeled non-hateful by 50% annotators: <user> <user> how many die every day especially the weekends in chicago douche and your crying about el paso if someone carried the death count would have been lower like dayton moron sheep for women i would not vote for one feminazi not one . Is the given statement hateful?	1	yes
The following statement was labeled non-hateful by 50% annotators: you can call me extremist degenerate deplorable kk whitest or whatever other name you like immigrants have taken what few job american have and corrupt politicians and corporation have taken the rest so do not give us any of this poor immigrant crap then use our taxes to support them . Is the given statement hateful?	0	yes
The following statement was labeled non-hateful by 50% annotators: why is this fat black niggress so upset get off those cupcakes you fat bitch . Is the given statement hateful?	0	yes
The following statement was labeled non-hateful by 50% annotators: <user> shes a bum n a world renown racist shes on par with farankhan n rev jeremiah wright michelle had non stop criticism for cops white christian repubs jews israel our military i support israel <percent> they r our allies in the middle east m obama soiled white house w her rhetoric . Is the given statement hateful?	1	yes
The following statement was labeled non-hateful by 50% annotators: australia is not a nation of immigrants but settlers and pioneers south australia is the only part that was settled by euro immigration and its one of the tinniest states . Is the given statement hateful?	1	non-hateful
The following statement was labeled non-hateful by 50% annotators: lol i live in a white nigger ghetto i claim no white niggerhood as a former english teacher i slum when i feel choose unlike my fellow city rats for whom its their only mode of comm . Is the given statement hateful?	0	yes
The following statement was labeled non-hateful by 50% annotators: <user> <user> yes this is actually the old traditional alba rose it very large <number> <number> feet in height with all the rain we had in june it was full of white blooms in the late spring amazing it really maintenance free too but no i am too lazy to make jelly . Is the given statement hateful?	1	non-hateful
The following statement was labeled non-hateful by 50% annotators: this weather for jadakiss dykes . Is the given statement hateful?	1	yes
The following statement was labeled non-hateful by 50% annotators: well cuz da jews suck dose babydicks . Is the given statement hateful?	0	yes
The following statement was labeled non-hateful by 50% annotators: everybody criticize lebron as if they can do w this nigga has done for the last <number> yrs lol . Is the given statement hateful?	1	yes
The following statement was labeled non-hateful by 50% annotators: did not you have to leave for work hours ago you shit tier kike lol tell your hooknosed bosses to send someone better before your shift ends . Is the given statement hateful?	0	yes
The following statement was labeled non-hateful by 50% annotators: gays love communism and especially islam they want to try to see if they can fly of tall buildings with a pack of carpet kissers helping them just to show they are not racist lol . Is the given statement hateful?	0	yes
The following statement was labeled non-hateful by 50% annotators: <user> <user> <user> 🤡 clownery luv i swear coons need to stop being submissive to white people . Is the given statement hateful?	0	yes
The following statement was labeled non-hateful by 50% annotators: <user> club diego tho stripper poles stripper hoes . Is the given statement hateful?	1	yes
The following statement was labeled non-hateful by 50% annotators: <user> we sentence you to the harshest punishment we have ever given a white person three months of community service restored to your position on the force with backpay and bonus and a written apology from the victim family for putting you through this ordeal . Is the given statement hateful?	1	non-hateful
The following statement was labeled non-hateful by 50% annotators: my friend saying that suicide squad is better than avengers and i was like bitch say it again i triple dare you . Is the given statement hateful?	1	yes
The following statement was labeled non-hateful by 50% annotators: and whatever leftist or muslim piece of shit downvoted this post let me be clear you can go fuck your mother after you admit that the so called prophet muhammad was a pervert and a fool britainfirst freejaydafransen freepaulgolding . Is the given statement hateful?	0	yes
The following statement was labeled non-hateful by 50% annotators: <user> what are you a nazi . Is the given statement hateful?	1	non-hateful
The following statement was labeled non-hateful by 50% annotators: goat fucking woman beating child raping sand niggers everywhere . Is the given statement hateful?	0	yes
The following statement was labeled non-hateful by 50% annotators: ibor is dumb boomer kike shill proposition only paul nehlen shall not censor is worth a while . Is the given statement hateful?	0	yes
The following statement was labeled non-hateful by 50% annotators: i thought wendy wasserman schultz was one ugly jewess where do they dig these disgusting jews up from they are caricatures of humans michellewolf journalists killjournalists . Is the given statement hateful?	0	yes
The following statement was labeled non-hateful by 50% annotators: kill nigger like love . Is the given statement hateful?	0	yes
The following statement was labeled non-hateful by 50% annotators: when you wanna be white really really bad but you are just a fucking wetback . Is the given statement hateful?	0	yes
The following statement was labeled non-hateful by 50% annotators: miss america shall embrace beer for beer makes fat women look beautiful . Is the given statement hateful?	1	non-hateful
The following statement was labeled non-hateful by 50% annotators: funny my gay lover and i had no idea we were homophobes until we came out as trump voters . Is the given statement hateful?	1	non-hateful
The following statement was labeled non-hateful by 50% annotators: going to start exercising my constitutional right call people dumb faggots in public . Is the given statement hateful?	0	yes
The following statement was labeled non-hateful by 50% annotators: watching unbelievable netflix the rapist has a copy of the ethical slut unbelievable . Is the given statement hateful?	1	no
The following statement was labeled non-hateful by 50% annotators: <user> i rly enjoying this gay moment of urs . Is the given statement hateful?	1	non-hateful
The following statement was labeled non-hateful by 50% annotators: newsom wants the train now he does not newsom wants the train now he does not the guy is a fucking quack who would vote him in . Is the given statement hateful?	1	yes
The following statement was labeled non-hateful by 50% annotators: now of course the towelhead perps will be perps that the police had on their radar and did nothing about . Is the given statement hateful?	0	no
The following statement was labeled non-hateful by 50% annotators: this obnoxious nigger bitch on tucker show deserves a noose put around her neck and hanged until she dead . Is the given statement hateful?	0	yes
The following statement was labeled non-hateful by 50% annotators: because the jews in israel are the only democracy in the mideast . Is the given statement hateful?	1	non-hateful
The following statement was labeled non-hateful by 50% annotators: <user> true religion is islam your excellency and i am proud be a muslim why because i respect other religions . Is the given statement hateful?	1	non-hateful
The following statement was labeled non-hateful by 50% annotators: i love my women but she thinks i ’ m playing . Is the given statement hateful?	1	non-hateful
The following statement was labeled non-hateful by 50% annotators: <user> you know the girls came out and literally said they didn ’ t get raped cole tried to get clout from the whole situation . Is the given statement hateful?	1	non-hateful
The following statement was labeled non-hateful by 50% annotators: i have not said it enough but fuck white bitches . Is the given statement hateful?	0	yes
The following statement was labeled non-hateful by 50% annotators: so let me get this straight google youtube facebook and msm are targeting free speech in the name of fakenews to protect a sleezy pizza place but they are okay shutting down a bakery who chooses not to make a cake for a gay wedding i smell guilt . Is the given statement hateful?	1	non-hateful
The following statement was labeled non-hateful by 50% annotators: recoupping out however is an inmate boulder for men and scum will distinctively immigrate it . Is the given statement hateful?	1	no
The following statement was labeled non-hateful by 50% annotators: <user> that explains why you do not have a problem with white genocide you are not white you are a kike that hates european whites fuck off . Is the given statement hateful?	0	yes
The following statement was labeled non-hateful by 50% annotators: with twitter banning me for <number> hours it is showing me the usa exactly what it feels like to be living in a communist state only thing missing is getting raped by a muslim watching my child getting married or raped by an old man . Is the given statement hateful?	0	no
The following statement was labeled non-hateful by 50% annotators: the nigger that shot up the church was an immigrant from from sudan . Is the given statement hateful?	0	yes
The following statement was labeled non-hateful by 50% annotators: another lying friggin nigger . Is the given statement hateful?	0	yes
The following statement was labeled non-hateful by 50% annotators: do some research tony you will find out that mohammed was an illiterate sand nigger married to jewesses rabbis were behind the whole islamic scam jews and arabs are basically inbred cousins neither jews or muzzies have any business being in white civilizations . Is the given statement hateful?	0	yes
The following statement was labeled non-hateful by 50% annotators: it always a upset white person or black person who dying to be white in my mentions upset af hoe well 🤷 🏾 ‍ ♀️ . Is the given statement hateful?	1	yes
The following statement was labeled non-hateful by 50% annotators: go live with your beloved niggers should be the only response to this kind of shit from now on oh u hate white ppl do u live in a shitty ghetto with blacks y not . Is the given statement hateful?	0	yes
The following statement was labeled non-hateful by 50% annotators: <user> <user> when i saw video of her family members walking in the courtroom they all looked like white supremacist klansmen especially the males they did not look like they were used to wearing suits they d be more comfortable in white robes . Is the given statement hateful?	1	no
The following statement was labeled non-hateful by 50% annotators: scroll down my timeline slut bragging about getting a professional white basketball player to pay for her nigglet bastard after the father ran off pol ran her off . Is the given statement hateful?	0	yes
The following statement was labeled non-hateful by 50% annotators: real madrid is a fucking joke bro 😂 . Is the given statement hateful?	1	yes
The following statement was labeled non-hateful by 50% annotators: <user> let us some queer person goes on publicly to say that all straight people should be killed would it be ok because reverse homophobia does not exist 🙄 . Is the given statement hateful?	1	non-hateful
The following statement was labeled non-hateful by 50% annotators: i listen to the same songs everyday i love ariana and blackpink 😩 can they and selena release new albums please . Is the given statement hateful?	1	non-hateful
The following statement was labeled non-hateful by 50% annotators: i am hoping this will clean out a lot of the shit in houston like katrina did with new orleans louisiana just used katrina to dump all of their niggers in houston and crime rates went through the fucking roof . Is the given statement hateful?	0	yes
The following statement was labeled non-hateful by 50% annotators: why don ’ t we make a separate country for illegal aliens and call it mexico . Is the given statement hateful?	1	no
The following statement was labeled non-hateful by 50% annotators: deport hogg wetback dyke . Is the given statement hateful?	0	yes
The following statement was labeled non-hateful by 50% annotators: <user> sur <number> <number> regrette women cheat with their ❤ ️ 🤷 🏽 ‍ ♀ ️ . Is the given statement hateful?	1	non-hateful
The following statement was labeled non-hateful by 50% annotators: <user> ❝ i hate you so fucking much max you better not talk about this with anyone ❞ . Is the given statement hateful?	1	yes
The following statement was labeled non-hateful by 50% annotators: <user> they found the violent nazis organizing the riots . Is the given statement hateful?	1	non-hateful
The following statement was labeled non-hateful by 50% annotators: goddamnit <user> you delete this stuff rn that nigger bitch <user> is not worth it i wish i were a man rn i would so go after that fat black cunt just because . Is the given statement hateful?	0	yes
The following statement was labeled non-hateful by 50% annotators: never forget kim petras defended the dude that drugged and raped kesha . Is the given statement hateful?	1	non-hateful
The following statement was labeled non-hateful by 50% annotators: a true muslim who follow quran cannot possess humanity . Is the given statement hateful?	0	no
The following statement was labeled non-hateful by 50% annotators: exactly i d rather die than have a nigger or sandnigger doctor . Is the given statement hateful?	0	yes
The following statement was labeled non-hateful by 50% annotators: we are not offended by the counter semitism if you are not outraged by what elite jews are doing to white countries you are not paying attention . Is the given statement hateful?	0	non-hateful
The following statement was labeled non-hateful by 50% annotators: <user> we are the satanic sluts your parents warned you about . Is the given statement hateful?	1	yes
The following statement was labeled non-hateful by 50% annotators: <user> <user> living on the blood and sweat of illegal and exploited immigrants is not something to be proud of . Is the given statement hateful?	1	non-hateful
The following statement was labeled non-hateful by 50% annotators: still thinking bout how camila was on x factor calling 5 h her sisters but in facebook making fun of the other girls with her friend calling them niggers i will dsl her clown nose 🤡 . Is the given statement hateful?	1	yes
The following statement was labeled non-hateful by 50% annotators: why are they calling muzzrats asians disingenuous as hell . Is the given statement hateful?	0	yes
The following statement was labeled non-hateful by 50% annotators: yeah try bitch and i will shove an ar15 up your snow nigger ass . Is the given statement hateful?	0	yes
The following statement was labeled non-hateful by 50% annotators: if there are legal immigrants who can enter the country properly and wait to get citizenship what the excuse of those who come here illegally answer there is none america wants legal immigrants who will help the country thrive not a bunch of freeloaders looking for handouts . Is the given statement hateful?	1	yes
The following statement was labeled non-hateful by 50% annotators: trumps calls shitskin countries shitholes and is lauded as a hero hillary called blacks super predators but is still a villain the power of kike brainwashing . Is the given statement hateful?	0	yes
The following statement was labeled non-hateful by 50% annotators: red velvet got called black old and homophobic all by their own fandom i can ’ t 😭 . Is the given statement hateful?	1	non-hateful
The following statement was labeled non-hateful by 50% annotators: spending addiction i pay all cash no need for the atm that for ma mama she scared niggas might rob her . Is the given statement hateful?	1	no
The following statement was labeled non-hateful by 50% annotators: men who refer to women as females steal . Is the given statement hateful?	1	no
The following statement was labeled non-hateful by 50% annotators: i gotta say as a woman i love it and white boys can not get hired these days because of these cunt feminazi demanding diversity choosing shitskins over kin not that i want to see our men reduced to this but payback is a bitch . Is the given statement hateful?	0	yes
The following statement was labeled non-hateful by 50% annotators: <user> tbh i was really disappointed when my husband friend dykey sister did not show up and make sweet love to me on my granite kitchen island 😔 . Is the given statement hateful?	1	no
The following statement was labeled non-hateful by 50% annotators: this movie is ghetto . Is the given statement hateful?	1	no
The following statement was labeled non-hateful by 50% annotators: typical nigger father breed them then leave them . Is the given statement hateful?	0	yes
The following statement was labeled non-hateful by 50% annotators: news for tacha fans who support pride violence arrogance insolence and bad behaviour your girl has been disqualified for all her supposedly good attitude at the <user> the nigerian people are not known for all these we do not condone such behaviours bb naija . Is the given statement hateful?	1	non-hateful
The following statement was labeled non-hateful by 50% annotators: lmao wow they really do not allow you to go around calling people kike on twitter anymore lmfao banned again . Is the given statement hateful?	1	no
The following statement was labeled non-hateful by 50% annotators: i think spicer is going to need to start using videos and charts and graphs to really teach the media the truth about issues like violence in chicago violent immigrants etc mere words are not enough the narrative in their heads is too strong . Is the given statement hateful?	1	non-hateful
The following statement was labeled non-hateful by 50% annotators: that bitch ass nigger <user> illis wont debate me its scared of yt making it look like a fool . Is the given statement hateful?	0	yes
The following statement was labeled non-hateful by 50% annotators: you are banned remember white boy . Is the given statement hateful?	1	yes
The following statement was labeled non-hateful by 50% annotators: i have reasons to dislike them and some reasons to like them i take the good with the bad if you have a specific answer i can answer it but i d like to remain in the holocaust subject if you do not mind . Is the given statement hateful?	1	non-hateful
The following statement was labeled non-hateful by 50% annotators: <user> <user> <user> it was way better than sonoma if you remember your redneck jesus won the glenn also . Is the given statement hateful?	1	no
The following statement was labeled non-hateful by 50% annotators: tradition the most brutal fights every black friday can be found at walmart usually triggered by minorities fighting over shit made in china i do not care for my fellow asians much but i would trade all this ghetto trash in for boatloads of japanese and koreans speekfreely maga gabfam . Is the given statement hateful?	0	non-hateful
The following statement was labeled non-hateful by 50% annotators: <user> yeah cuz incel violence is a fucking epidemic and movies cause violence this joker outrage is just stupid it only a movie chill . Is the given statement hateful?	1	no
The following statement was labeled non-hateful by 50% annotators: she is referring to the de niro projects financed for or by kike rapist harvey weinstein it helps if you took english reading classes dummy . Is the given statement hateful?	0	yes
The following statement was labeled non-hateful by 50% annotators: we will keep our way you guys can keep your muzzies and grooming gangs . Is the given statement hateful?	0	yes
The following statement was labeled non-hateful by 50% annotators: larry says <date> at <time> a closet raghead is certainly a possibility i would not rule out and where in the philippines is the girlfriend originally from if she from zamboanga or cotabato that would raise a big red flag because that raghead territory . Is the given statement hateful?	0	yes
The following statement was labeled non-hateful by 50% annotators: libtard men are getting pap smears and libtard women are getting their peni enlarged . Is the given statement hateful?	0	yes
The following statement was labeled non-hateful by 50% annotators: i almost went on holiday to amsterdam this year but with the muzzie invasion just did not feel safe doing it now i am grounded and only drive wyoming here i come this spring summer . Is the given statement hateful?	0	no
The following statement was labeled non-hateful by 50% annotators: over <number> undocumented immigrants living in california were granted driver licenses in <number> due to california state law ab60 the california department of motor vehicles dmv expects that at least <number> million illegal migrants will be issued a driver license under the law by late <number> . Is the given statement hateful?	1	non-hateful
The following statement was labeled non-hateful by 50% annotators: shivaji companion during his fabled escape from the mughal internment in agra was madari mehtar — a muslim shivaji even extended courtesy to sworn enemies like afzal khan 21 st century rss rss roadmaps . Is the given statement hateful?	1	non-hateful
The following statement was labeled non-hateful by 50% annotators: <user> <user> he ’ gay himself . Is the given statement hateful?	1	non-hateful
The following statement was labeled non-hateful by 50% annotators: so talking of intellectual ghettos in an age in which simply being white and not a screaming leftist ghettoizes one as a white supremacist so what being called something anyway w o even enjoying the advantages of actually being one seems something of a waste . Is the given statement hateful?	1	non-hateful
The following statement was labeled non-hateful by 50% annotators: <user> please do not kill yourself 😔 . Is the given statement hateful?	1	non-hateful
The following statement was labeled non-hateful by 50% annotators: cuz civic nationalism does not work diversity inherently creates conflict and for every <number> 2 nd 3 rd gen immigrant who wants to become american <number> do not humans are inherently tribal civic nationalism tries to undo this in favor of creating a tribe around a flag but it fights human nature loses . Is the given statement…	1	non-hateful
The following statement was labeled non-hateful by 50% annotators: all these niggas is parrots . Is the given statement hateful?	1	yes
The following statement was labeled non-hateful by 50% annotators: maria bartiromo at record speed and extremists have to host refugees as this administration over <number> legislation approvals . Is the given statement hateful?	1	non-hateful
The following statement was labeled non-hateful by 50% annotators: nigger porch monkey tree fruit neggra niggress ol black joe . Is the given statement hateful?	0	yes
The following statement was labeled non-hateful by 50% annotators: what you support obvious fed niggershill kike wignat pipebombers good . Is the given statement hateful?	0	yes
The following statement was labeled non-hateful by 50% annotators: if a hard border goes up there will be violence they just tryna make it seem like we brought it upon ourselves . Is the given statement hateful?	1	non-hateful
The following statement was labeled non-hateful by 50% annotators: juan is about as much of a fucking a stupid ass nigger as any juan can get libtards like this fucking nigger black democrat asshole have exhausted their statute of limitations much in the same way that white gop fucking stupid ass feminist bush whore bitches like perino bitchtwat have exhausted theirs . Is the given statement hate…	0	yes
The following statement was labeled non-hateful by 50% annotators: <user> what if a muslim refugee lies says that he was persecuted because he had converted to any of these religions but reverts back to islam after getting indian citizenship taklu is fooling bengalis fact is that they dumped citizenship amendment bill after opposition in ne states . Is the given statement hateful?	1	non-hateful
The following statement was labeled non-hateful by 50% annotators: 🎊 🎊 hindu rashtra by midnight 🎉 🎉 one tight slap for fiberals burnol for jihadis and sickulars 🙏 🙏 thank you modi zee 🙏 🙏 . Is the given statement hateful?	0	yes
The following statement was labeled non-hateful by 50% annotators: some mudslimes got ran over in london karma is a motherfucker . Is the given statement hateful?	0	yes
The following statement was labeled non-hateful by 50% annotators: <user> <user> justin trudeau is a jihadi apologist . Is the given statement hateful?	1	non-hateful
The following statement was labeled non-hateful by 50% annotators: <user> you gotta watch ‘ return to paradise ’ with joakin phoenix that shit will have you never doing illegal shit in other countries . Is the given statement hateful?	1	non-hateful
The following statement was labeled non-hateful by 50% annotators: let them take the faggots . Is the given statement hateful?	0	yes
The following statement was labeled non-hateful by 50% annotators: infrastructure is required to get energy from the ground to the socket the wetback vag whose <number> day old bridge collapsed in miami last week might be building power lines next . Is the given statement hateful?	0	no
The following statement was labeled non-hateful by 50% annotators: a negress too dumb to fuck has a scant chance of understanding anything beyond the size of a dick . Is the given statement hateful?	0	yes
The following statement was labeled non-hateful by 50% annotators: <user> these hoes ain t shit bro u cute as hell . Is the given statement hateful?	1	no
The following statement was labeled non-hateful by 50% annotators: breona that my dyke 🤣 . Is the given statement hateful?	1	yes
The following statement was labeled non-hateful by 50% annotators: eat me it a ritual created by the jews to bring their sons closer to god the rabbi literally sucks the bleeding dick fuck off with your pagan rituals . Is the given statement hateful?	0	yes
The following statement was labeled non-hateful by 50% annotators: stop telling women what to wear fam it dead . Is the given statement hateful?	1	no
The following statement was labeled non-hateful by 50% annotators: i forgot to add those poor palestinian towel heads we will ask them how peaceful these so called rat jews are i do not think they will say the jew is very peaceful . Is the given statement hateful?	0	yes
The following statement was labeled non-hateful by 50% annotators: <user> just time to ban all mudslime immigration lets not discriminate against mudslime majorities . Is the given statement hateful?	0	yes
The following statement was labeled non-hateful by 50% annotators: <user> he is not a news anchor he is a suck up to d trump maybe even secret gay lovers . Is the given statement hateful?	1	non-hateful
The following statement was labeled non-hateful by 50% annotators: hope he keeps stressing the point unfortunately the system will most probably get him removed for speaking the truth france is so scared of these invading illegal moslem shite in case they react and run riot even more than they currently do . Is the given statement hateful?	0	yes
The following statement was labeled non-hateful by 50% annotators: <user> <user> maybe sturgeon will offer her a room at her house along with the syrians refugees . Is the given statement hateful?	1	non-hateful
The following statement was labeled non-hateful by 50% annotators: about normal for this little muzrat lover anything to go against this country and the present government while he has a house in london and a six bedroomed manor house with land in the the country of shropshire nice one corbyn you scummy fake socialist . Is the given statement hateful?	0	yes
The following statement was labeled non-hateful by 50% annotators: so the non european kike won eurovision oh vey look at the fucking state of it . Is the given statement hateful?	0	yes
The following statement was labeled non-hateful by 50% annotators: namjoon black hair ah bbm as top social bts <user> . Is the given statement hateful?	1	non-hateful
The following statement was labeled non-hateful by 50% annotators: will i get in trouble for saying nigger or towelhead here . Is the given statement hateful?	0	yes
The following statement was labeled non-hateful by 50% annotators: well that really complicated i guess when we have a stable domain i do not know when that will be iceland is trying to kike us right now . Is the given statement hateful?	0	no
The following statement was labeled non-hateful by 50% annotators: <user> rules are rules leave the ghetto at the door when you walk in . Is the given statement hateful?	1	non-hateful
The following statement was labeled non-hateful by 50% annotators: even nigger parents do not want their nigger kids going to schools with large numbers of nigger teachers and nigger students . Is the given statement hateful?	0	yes
The following statement was labeled non-hateful by 50% annotators: or velcro headed shit skin darkies 🤔 . Is the given statement hateful?	0	yes
The following statement was labeled non-hateful by 50% annotators: far left and far right will eventually embrace violence and mutually destroy one another possibly leaving the path clear for a truly sustainable egalitarian society you are all being played so goddamn hard it hilarious . Is the given statement hateful?	1	non-hateful
The following statement was labeled non-hateful by 50% annotators: <user> progressives who want gun safety laws and who want immigrants . Is the given statement hateful?	1	non-hateful
The following statement was labeled non-hateful by 50% annotators: what d ya know the fag the spick and the lesbian on the bench also know the meaning of the first happy days . Is the given statement hateful?	0	yes
The following statement was labeled non-hateful by 50% annotators: <user> you have got white supremacists you have got fear mongers you have got unfeeling bigots you have wealthy elitists who hate the poor and immigrants what else is wrong with you . Is the given statement hateful?	1	yes
The following statement was labeled non-hateful by 50% annotators: paul nehlan calls out antifa for instigating violence and says uniteright has a right to protest and free speech wow this guy is getting better and better he needs to beat they guy that stole eddie munster haircut paul ryan . Is the given statement hateful?	1	non-hateful
The following statement was labeled non-hateful by 50% annotators: ok it ain t just me <number> out here hunting niggers on god they tweakin this month . Is the given statement hateful?	0	yes
The following statement was labeled non-hateful by 50% annotators: agh waters world dem negresses remarks god dayum . Is the given statement hateful?	0	yes
The following statement was labeled non-hateful by 50% annotators: well if you ever wanted to sum up a greasy hook nose performance that it <number> deep block behind a team who have lingard and pereira in the front <number> lmao cant wait for him to get the sack . Is the given statement hateful?	1	no
The following statement was labeled non-hateful by 50% annotators: better yet call becky with the hoe pxy . Is the given statement hateful?	1	yes
The following statement was labeled non-hateful by 50% annotators: it looks like they are slipping they used to wipe out way more muzzies then that . Is the given statement hateful?	0	no
The following statement was labeled non-hateful by 50% annotators: tens of thousands of moslems doing their eid or ramadam or whatever the hell they call it prayers in bensonhurst park in new york of all places i bet that that cucked faggot <user> was their probably to get some business for his travelling gay interracial gloryhole . Is the given statement hateful?	0	yes
The following statement was labeled non-hateful by 50% annotators: <user> i cometely agree the playbook has been around since the 1 8 6 0 white men wanting to take back the country it frighteningly similar to post reconstruction violence and terror . Is the given statement hateful?	1	non-hateful
The following statement was labeled non-hateful by 50% annotators: having a car too much work i am tired of gas changing the oil need new brakes and now tires this is ghetto . Is the given statement hateful?	1	no
The following statement was labeled non-hateful by 50% annotators: <user> fuck off then language of the streets where i am from it also got you too notice a no pc bullshit here lady children being raped and you dare say about language exactly why not enough being done too busy pissing about with your niceties . Is the given statement hateful?	1	yes
The following statement was labeled non-hateful by 50% annotators: welcome one and all hope everyone is having a great weekend big job in the garden tomorrow getting it spick and span after the winter washout should be a nice day by all accounts got any plans brit fam . Is the given statement hateful?	1	no
The following statement was labeled non-hateful by 50% annotators: i am gonna be laughing my ass off when the faggots who run twitter realize how much they fucked up their app in one foul move . Is the given statement hateful?	0	yes
The following statement was labeled non-hateful by 50% annotators: put pressure on a nigga he gone run to a weak bitch everytime ‼️ 🤮 . Is the given statement hateful?	1	yes
The following statement was labeled non-hateful by 50% annotators: homies get in the gloves when they settling some shit with each other why can not women 🤔 . Is the given statement hateful?	1	no
The following statement was labeled non-hateful by 50% annotators: laws regarding immigration system isnt going to keep the dems from circumventing the system by breaking the law to allow mass immigration of muslims mexicans only <number> thing can be done to stop mass immigration start throwing dems in jail until that happens immigrants will flow like water . Is the given statement hateful?	1	no
The following statement was labeled non-hateful by 50% annotators: at least she does not look like a man like <percent> of negresses out there the remaining <percent> just look like hermaphrodites lol btw i mute niggers go ahead and reply like a retarded monkey knowing i will never read your ooks and eeks . Is the given statement hateful?	0	yes
The following statement was labeled non-hateful by 50% annotators: that cranberry bullshit is just some ghetto jello . Is the given statement hateful?	1	no
The following statement was labeled non-hateful by 50% annotators: <user> the indisputable fact is that the majority of the illegal immigrants in india are muslim there should be a policy to tackle the issue of illegal immigration irrespective of their religion what are your suggestions . Is the given statement hateful?	1	non-hateful
The following statement was labeled non-hateful by 50% annotators: <user> thank you finally a white person stating facts . Is the given statement hateful?	1	non-hateful
The following statement was labeled non-hateful by 50% annotators: noted you did not deny being a nigger lover now run along i have not got time to waste replying to sluts like you ok have a nice night . Is the given statement hateful?	0	yes
The following statement was labeled non-hateful by 50% annotators: twitter is going to get bought out then i could really careless what happens to that liberal of a retard company i just want my buy out money and im happy twtr . Is the given statement hateful?	1	yes
The following statement was labeled non-hateful by 50% annotators: <user> wait until it starts in earnest we have had muslim grooming gangs operating in the uk for years literally thousands of young girls have been raped and abused while the police and the authorities were paralyzed by political correctness irredeemably shameful . Is the given statement hateful?	1	non-hateful
The following statement was labeled non-hateful by 50% annotators: a shaming campaign for homeowners who use beaner labor is in order . Is the given statement hateful?	0	non-hateful
The following statement was labeled non-hateful by 50% annotators: you might just think i am a dumb slut but i will have you know i am actually an intellectual slut . Is the given statement hateful?	1	no
The following statement was labeled non-hateful by 50% annotators: <user> slack jawed knuckle dragging mouth breathing toothless inbred redneck backwoods uneducated hillbilly hicks that the republican party . Is the given statement hateful?	1	yes
The following statement was labeled non-hateful by 50% annotators: i have been at the rmv for almost an hour but i did just hear some aggressive white boy fail his permit test . Is the given statement hateful?	1	non-hateful
The following statement was labeled non-hateful by 50% annotators: not to be dramatic but i think this contributed to me being put off reading bc the majority of these spaces feel the exact same as straight women lauding over wanting gay men as best friends while shunning lesbians . Is the given statement hateful?	1	non-hateful
The following statement was labeled non-hateful by 50% annotators: i am totally sure she dindunuffin grandpa i mean in this day and age it literally tyrannical to ask that your woman show a little bit of public decency not fuck random niggers behind your back and care if her child is actually yours all the signs were there though . Is the given statement hateful?	0	yes
The following statement was labeled non-hateful by 50% annotators: just imagine how much more progressive and liberal muslim countries will be if majority were shia . Is the given statement hateful?	1	non-hateful
The following statement was labeled non-hateful by 50% annotators: <user> <user> the people who used to believe that in <number> were all white people high on lsd . Is the given statement hateful?	1	non-hateful
The following statement was labeled non-hateful by 50% annotators: amber rose new bd look like a dyke 😭 . Is the given statement hateful?	0	yes
The following statement was labeled non-hateful by 50% annotators: <percent> kike move . Is the given statement hateful?	0	no
The following statement was labeled non-hateful by 50% annotators: or perhaps chinese or nepalese it a horrible insult really they can not say muslim because they know it muslim culture to rape children . Is the given statement hateful?	0	yes
The following statement was labeled non-hateful by 50% annotators: them feels when you realize yo girl just ran off with a nigger . Is the given statement hateful?	0	yes
The following statement was labeled non-hateful by 50% annotators: flashback to the heyday of souls fandom and online content unsubscribing from a souls content creator like every week because they could not stop themselves from slipping a faggot or retarded into a video as a funny haha . Is the given statement hateful?	1	yes
The following statement was labeled non-hateful by 50% annotators: <user> <user> <user> <user> <user> <user> if he not lazy why is he butt hurt americans are lazy compared to african countries that fact is not nearly enough reason for me not want them here african immigrants are not the enemy white supremacy is . Is the given statement hateful?	1	no
The following statement was labeled non-hateful by 50% annotators: i have been on <number> since a kenyan moslem became president . Is the given statement hateful?	0	non-hateful
The following statement was labeled non-hateful by 50% annotators: <user> your such an ass 😂 i ’ m damn near retarded 🤦 🏻 ‍ ♂ ️ i love you 🤣 🥰 . Is the given statement hateful?	1	yes
The following statement was labeled non-hateful by 50% annotators: i knew i was fucked up last night when i saw those black party buses full of white kids pull up to lion and said ah shit the colonizers are here . Is the given statement hateful?	1	no
The following statement was labeled non-hateful by 50% annotators: hottest picture ever red and white bathing suit free dick pictures boobs clips bra panty photo . Is the given statement hateful?	1	no
The following statement was labeled non-hateful by 50% annotators: i do not think my bf knew what he was getting in a relationship with cause i will shoot his white ass if he keep leaving me on read . Is the given statement hateful?	1	yes
The following statement was labeled non-hateful by 50% annotators: i hope these nigger poachers get tortured to death slowly . Is the given statement hateful?	0	yes
The following statement was labeled non-hateful by 50% annotators: mike feed the queers to the steers pence lol ok i am all out . Is the given statement hateful?	0	yes
The following statement was labeled non-hateful by 50% annotators: we usually do not talk about black on white crime as terrorism because ghetto blacks are too animalistic to have complexly articulate ideology if terrorism is defined as violence with political goal though then black anti white race warfare is more popular than all other forms combined . Is the given statement hateful?	0	no
The following statement was labeled non-hateful by 50% annotators: <user> <user> shut up nigger . Is the given statement hateful?	0	yes
The following statement was labeled non-hateful by 50% annotators: the rags have got to be forced the fuck out of our lands the good ones will have only their co dune coons to blame you bastards are why we are all back in this shit hole . Is the given statement hateful?	0	yes
The following statement was labeled non-hateful by 50% annotators: mds bui niggas gat me diving for conch in class . Is the given statement hateful?	1	no
The following statement was labeled non-hateful by 50% annotators: the one raped by a homosexual when she was <number> is the gay one right must be genetic . Is the given statement hateful?	0	non-hateful
The following statement was labeled non-hateful by 50% annotators: <user> we have never seen any fabricates of whites being harassed as breaking news in our countries in my neighborhood one white lady pressed some serious charges against a black boy for harassment after much investigation it was found that she was just lying it wasn t a breakingnews . Is the given statement hateful?	1	non-hateful
The following statement was labeled non-hateful by 50% annotators: just hang the piece of moslem shit by the nuts with rusty wire if that does not work try his neck . Is the given statement hateful?	0	yes
The following statement was labeled non-hateful by 50% annotators: <user> every nigger must pay back his welfare and entitlements . Is the given statement hateful?	0	hateful
The following statement was labeled non-hateful by 50% annotators: <user> chinaman satanist lee hsien loong criminals audible talks in <number> wellington circle singapore are always negative that they screenshot and put his profile on facebook <date> lee hsien loong disloyal to his criminals and lawyers . Is the given statement hateful?	1	no
The following statement was labeled non-hateful by 50% annotators: only when i am in the ghetto . Is the given statement hateful?	1	non-hateful
The following statement was labeled non-hateful by 50% annotators: <user> run that doctor faggot joke back now though . Is the given statement hateful?	1	yes
The following statement was labeled non-hateful by 50% annotators: <user> the ship queer sounds like the exact gay pirate vibe i have been craving my whole life . Is the given statement hateful?	1	non-hateful
The following statement was labeled non-hateful by 50% annotators: <user> true but gay people are still beaten and killed at a high rate lgbtq children are the largest group of homeless youth and gay people where some of the first killed during the holocaust being gay was also illegal but n this country until pretty recently . Is the given statement hateful?	1	non-hateful
The following statement was labeled non-hateful by 50% annotators: i know and work with many indians and sikhs almost all are hard working polite honourable people who don t like blacks jews queers or liberals . Is the given statement hateful?	1	no
The following statement was labeled non-hateful by 50% annotators: i am not obligated to date a broke nigga mfs try to make you feel bad for having standards . Is the given statement hateful?	1	yes
The following statement was labeled non-hateful by 50% annotators: <user> hahahahaha i fucking hate you 😂 😂 😂 😂 😂 💀 💀 💀 . Is the given statement hateful?	1	yes
The following statement was labeled non-hateful by 50% annotators: there are plenty not all are as public but many ppl of all races gay ppl etc are becoming red pilled these days . Is the given statement hateful?	1	non-hateful
The following statement was labeled non-hateful by 50% annotators: lol that resourceful <laugh> not condoning their violence obviously but it almost charmingly ghetto with its limited basic materials like what a super edgy teen would make . Is the given statement hateful?	1	non-hateful
The following statement was labeled non-hateful by 50% annotators: <user> i wll bet in that <number> percent names in that list would be muslims . Is the given statement hateful?	1	non-hateful
The following statement was labeled non-hateful by 50% annotators: it amazing how long <user> ‍ talked without giving any answers i learned way more about <user> ‍ thoughts and life than sargon i thought only jews could bloviate that hard hm . Is the given statement hateful?	0	no
The following statement was labeled non-hateful by 50% annotators: <user> <user> <user> yup it true a lot of jews in my ancestry but people still consider them white and the real rulers of the world lol . Is the given statement hateful?	1	non-hateful
The following statement was labeled non-hateful by 50% annotators: do the democrats still give a crap about illegal aliens the wall racism white supremacy child trafficking drugs guns hookers what else was there oh yeah fake whistleblower now 😂 😂 😂 . Is the given statement hateful?	1	yes
The following statement was labeled non-hateful by 50% annotators: <user> <user> but remainers love fake news meanwhile in the real world everyone canyon your nazis in action . Is the given statement hateful?	1	non-hateful
The following statement was labeled non-hateful by 50% annotators: the hpv causes cancer scam was introduced to the goyim so as to make mega shekels on yet another bogus kike vaccine here goyim we have gardisil for your girls and boys do not buy the kosher bullshit bro . Is the given statement hateful?	0	yes
The following statement was labeled non-hateful by 50% annotators: japan does not have the problem of moslem terrorists rape gangs or negro gangsters ruining their country . Is the given statement hateful?	0	non-hateful
The following statement was labeled non-hateful by 50% annotators: i understand nazi faggot code you are calling it quits but we both knew you would fag out lol . Is the given statement hateful?	0	yes
The following statement was labeled non-hateful by 50% annotators: shut up you nigger kike learn math niggers commit aggravated assault at a rate <number> × that of whites keep eating soy you feminised cuck enjoy being replaced by baboons who will never get to outer space ever again . Is the given statement hateful?	0	yes
The following statement was labeled non-hateful by 50% annotators: but speaking of sexual harassment and abuse what about at the presidential level responding to a tweet summarizing oprah speech famous bill clinton sexual abuse victim juanita broaddrick said the following . Is the given statement hateful?	1	non-hateful
The following statement was labeled non-hateful by 50% annotators: blackpill they are still having babies someone call bill gates operation sterilize the beaners has failed . Is the given statement hateful?	0	yes
The following statement was labeled non-hateful by 50% annotators: <user> dang hate your married you seem to cool i still probably shouldn ’ t say lol don ’ t want to offend ya at all . Is the given statement hateful?	1	no
The following statement was labeled non-hateful by 50% annotators: soon mudsharks will start being afraid to walk the streets good we need more mudshark shaming and ass kicking . Is the given statement hateful?	0	yes
The following statement was labeled non-hateful by 50% annotators: alex jones is falsely reporting that franks did not want to have sex with the women he tried to pay to be surrogate mothers . Is the given statement hateful?	1	non-hateful
The following statement was labeled non-hateful by 50% annotators: <user> they are given refugee because muslim majority countries are killing them be it hindu or sikh or christian and muslims are just illegally immigrate nothing else . Is the given statement hateful?	1	non-hateful
The following statement was labeled non-hateful by 50% annotators: <user> <user> another hoax against caucasians • is this crap that keeps happening to white folks our white privilege that we keep hearing about . Is the given statement hateful?	1	no
The following statement was labeled non-hateful by 50% annotators: <user> by impregnated you mean raped omg . Is the given statement hateful?	1	yes
The following statement was labeled non-hateful by 50% annotators: <user> fact <number> the annual report from the department of justice shows that when whites commit violence they do it to blacks <number> of the time blacks on the other hand choose white victims more than half the time . Is the given statement hateful?	1	non-hateful
The following statement was labeled non-hateful by 50% annotators: it is sustainable thousands of children all over the us are without those trappings it does have to be that way race matters my tribe white western european men and women come first all others are meaningless to me kind after kind . Is the given statement hateful?	1	yes
The following statement was labeled non-hateful by 50% annotators: yall voted dyke shorts kyle lowry over derrick rose whoever voted for lowry should be ashamed . Is the given statement hateful?	1	yes
The following statement was labeled non-hateful by 50% annotators: <user> thats honestly retarded and rude ur hating on <number> year old kids ik some are toxic rude mean full of lies but that u . Is the given statement hateful?	0	yes
The following statement was labeled non-hateful by 50% annotators: true dat if you take your daughter to see this little spic whore and her troop of gyrating stage baboons you already put her on the road to death and depravity ahmed just sped things up . Is the given statement hateful?	0	yes
The following statement was labeled non-hateful by 50% annotators: also how fucked up was the curry nigger in the <number> <number> briefing that did not even know trump name said only president then awkward silence and still got to ask a question indians should not be allowed at the press briefings either the lighter skinned indian woman was annoying too . Is the given statement hateful?	0	yes
The following statement was labeled non-hateful by 50% annotators: maga speakfreely gabfam when will someone call american niggers out for being terrorists i bet if the nasty refugees had mall fights over christmas someone would have proposed a solution . Is the given statement hateful?	0	yes
The following statement was labeled non-hateful by 50% annotators: the globalist eu jew whores are sneering at trump his halt of the sand nigger immivasion because he exposing them to be the weaklings cultural marxist cowards they are . Is the given statement hateful?	0	yes
The following statement was labeled non-hateful by 50% annotators: of course i just wanted to grammar nazi myself i am feeling mildly retarded today . Is the given statement hateful?	1	yes
The following statement was labeled non-hateful by 50% annotators: every jew including nyc rabbis and ortho jews insist adam and eve are not only god prototypical humans but also jews smdh . Is the given statement hateful?	1	non-hateful
The following statement was labeled non-hateful by 50% annotators: eu will not last another <number> years i think it will be the italians that eventually bring down the kike show . Is the given statement hateful?	0	no
The following statement was labeled non-hateful by 50% annotators: oh look i notice all these little muslim bastards are out now speaking about carnage where the fuck are you when it muslims killing all of our people black white etc you bastards do not have my sympathy fuck you assholes i knew you could speak truth revealed maga fuckislam . Is the given statement hateful?	0	yes
The following statement was labeled non-hateful by 50% annotators: ahed tamimi is whiter than all the kike rats in israel free ahed tamimi gas the jews . Is the given statement hateful?	0	yes
The following statement was labeled non-hateful by 50% annotators: they of all people know how much violence is going on and are sick of it and want to protect their children . Is the given statement hateful?	1	non-hateful
The following statement was labeled non-hateful by 50% annotators: white car black tint think he was tryna hide her told her she should duck faster lauriana 🤣 🤣 . Is the given statement hateful?	1	no
The following statement was labeled non-hateful by 50% annotators: if you really want to jack up the gay msm cognitive dissonance we need to see more dindu on homo violence episodes drop leaflets on chicago splaining that gays are fond of carrying fat rolls of cash one day the media queers will all wake up in a log cabin with questions . Is the given statement hateful?	0	non-hateful
The following statement was labeled non-hateful by 50% annotators: oomf a <number> yearl old closet gay and obsessed with me someone help . Is the given statement hateful?	1	no
The following statement was labeled non-hateful by 50% annotators: mr trudeau you pledged <money> million to the rohingya refugee crisis while we have a refugee crisis of our own flooding into quebec that you will not address you pledged <money> million to caribbean reconstruction while our own infrastructure in cities is falling apart why vote 4 u . Is the given statement hateful?	1	non-hateful
The following statement was labeled non-hateful by 50% annotators: i ’ ve had enough of uwu kweers faggots and d*kes <censored> amp transgenders lemme year you make some fucking noise . Is the given statement hateful?	0	yes
The following statement was labeled non-hateful by 50% annotators: <user> muslims just simply should not be in the world . Is the given statement hateful?	0	hateful
The following statement was labeled non-hateful by 50% annotators: <user> i have been up super early so shut up nigger . Is the given statement hateful?	0	yes
The following statement was labeled non-hateful by 50% annotators: no i do not want to be your homie no we not friends no i do not wanna blow tree with you kill yourself . Is the given statement hateful?	1	yes
The following statement was labeled non-hateful by 50% annotators: one must wonder how long she will do in jail on the taxpayers dime before they decide to toss her spic ass out as for the guy castrate him and jail him for life the prisoners in nevada will deal with the matter themselves tyvm . Is the given statement hateful?	0	yes
The following statement was labeled non-hateful by 50% annotators: if the bbi will end the circle of violence and tension after every five years then bring it on . Is the given statement hateful?	1	non-hateful
The following statement was labeled non-hateful by 50% annotators: <user> <user> wait wait you dumb nigger . Is the given statement hateful?	0	yes
The following statement was labeled non-hateful by 50% annotators: well i locked my keys in my car and im now chugging grape juice in the publix parking lot this is it this is how crackheads are born . Is the given statement hateful?	1	yes
The following statement was labeled non-hateful by 50% annotators: they should tie this bitch down and let everyone of those girls stab her to death welcome to hell you muzzy cunt . Is the given statement hateful?	0	yes
The following statement was labeled non-hateful by 50% annotators: get a load of that nigger . Is the given statement hateful?	1	yes
The following statement was labeled non-hateful by 50% annotators: <user> everytime i see your avatar i think honky tonk . Is the given statement hateful?	1	non-hateful
The following statement was labeled non-hateful by 50% annotators: i wanna start twitter beef with a white christian mom . Is the given statement hateful?	1	non-hateful
The following statement was labeled non-hateful by 50% annotators: <user> obama catch and release is an abomination on america obama should be held responsible for every american who is raped and killed by illegals . Is the given statement hateful?	1	yes
The following statement was labeled non-hateful by 50% annotators: <user> <user> <user> you see the moral values that are clearly stated such as not committing fornication are unanimously agreed just like stealing taxes etc now if you are so confident let me ask you this islam is against fornication homosexuality occurs as a form of fornication therefore . Is the given statement hateful?	1	non-hateful
The following statement was labeled non-hateful by 50% annotators: not a problem even though i know she a mudshark i still adore her . Is the given statement hateful?	0	no
The following statement was labeled non-hateful by 50% annotators: i keep trying to start a petition to make abortion clinics throw the white babies in a separate dumpster from the nigger babies but they keep taking my petition down and now i must be banned cuz i cant start a new one 😡 . Is the given statement hateful?	0	yes
The following statement was labeled non-hateful by 50% annotators: to infiltrate and spread islam they need to fuck off back where they came from . Is the given statement hateful?	0	yes
The following statement was labeled non-hateful by 50% annotators: you do not even know your dad and all you did was recycle my joke about your mom i get that you are used to stealing but try not to do it out in the open like a crack nigger . Is the given statement hateful?	0	yes
The following statement was labeled non-hateful by 50% annotators: nyc bomber dam i burned my dick off wow now i am a transgender muzzrat now deblasio will pay me twice as much . Is the given statement hateful?	0	yes
The following statement was labeled non-hateful by 50% annotators: tfw a spic is a neo nazi lmao <percent> . Is the given statement hateful?	0	no
The following statement was labeled non-hateful by 50% annotators: us president donald trump has welcomed a supreme court ruling allowing his travel ban to be partly reinstated as a victory for our national security america highest court also granted a white house request allowing part of its refugee ban to go into effect . Is the given statement hateful?	1	non-hateful
The following statement was labeled non-hateful by 50% annotators: here the funny thing about sarsour she d never dare try to pull this bullshit in a muzzie country shed need that much makeup to cover the bruises from being slapped around by their cowardly men these maggots are establishing a caliphate right under our apathetic ignorant little noses . Is the given statement hateful?	0	yes
The following statement was labeled non-hateful by 50% annotators: <user> <user> the us has several forms of bigotry racism nativism myzoginy islamophobia anti semitism white men who are not on a receiving end of any learned to use the language of opposing one as a cover or justification for indulging in one or more of the rest . Is the given statement hateful?	1	non-hateful
The following statement was labeled non-hateful by 50% annotators: lol actually my reply was a sarcastic comment that a moslem would try to fuck a turkey . Is the given statement hateful?	0	no
The following statement was labeled non-hateful by 50% annotators: only elite looters are enriched when they import a 6 0 iq moslem onto welfare section <number> homeless vets would not need taxpayer paid classes on how to use toilets in free homes . Is the given statement hateful?	1	no
The following statement was labeled non-hateful by 50% annotators: oy vey what a kike i must be to say that . Is the given statement hateful?	0	yes
The following statement was labeled non-hateful by 50% annotators: <user> modi is the pm of whole of india he went to chennai and fucked all niggers all you could do was tweet gobackmodi . Is the given statement hateful?	1	yes
The following statement was labeled non-hateful by 50% annotators: play one game of overwatch after a month away very first game instantly has two players calling people faggots and to kill yourself oh boy i gotta just not play this game at all anymore . Is the given statement hateful?	1	yes
The following statement was labeled non-hateful by 50% annotators: you all are sophomores in high school now why aos you wanna bring shit up and charge her scheme ass little girl . Is the given statement hateful?	1	yes
The following statement was labeled non-hateful by 50% annotators: yes world need another zhid holocaust this time not <number> million but <number> that infecting countries . Is the given statement hateful?	0	yes
The following statement was labeled non-hateful by 50% annotators: actually yes there were irish slaves in america mostly women and girls who were allowed to work in the manors as opposed to the fields they were also forced to have sex with the negro slaves this is why many african americans today have irish or english scottish blood in them . Is the given statement hateful?	1	no
The following statement was labeled non-hateful by 50% annotators: on god some of you niggas need to be euthanized and hung no cap straight fucking incels . Is the given statement hateful?	1	yes
The following statement was labeled non-hateful by 50% annotators: zion goes down after slipping and tearing out of his shoes he limps off on his own power jack white in to the game . Is the given statement hateful?	1	non-hateful
The following statement was labeled non-hateful by 50% annotators: i can not tell one sand nigger from the next . Is the given statement hateful?	0	yes
The following statement was labeled non-hateful by 50% annotators: <user> <user> <user> issue why write a do gooder illegal immigrant fraudulently in the country fleeing death and persecution and not one who raped little girls or murdered a child by dismemberment because that scenario does not fit <user> narrative change the law . Is the given statement hateful?	1	non-hateful
The following statement was labeled non-hateful by 50% annotators: egyptians in <number> bc be like omg what am i gonna wear today and then open their closet full of white linen lmfaoo 🤣 🤣 🤣 . Is the given statement hateful?	1	non-hateful
The following statement was labeled non-hateful by 50% annotators: this is so disgusting a lot of single mother leftist aka liberal women do this kind of shit with their sons to varying degrees they are intentionally conditioning their sons to be gay because they are embittered towards men men who in most cases they drove away with their leftist bullshit . Is the given statement hateful?	0	yes
The following statement was labeled non-hateful by 50% annotators: prolly heard im a hoe from a hoe . Is the given statement hateful?	1	yes
The following statement was labeled non-hateful by 50% annotators: a nigga really raped ody that shit is really irking my shit . Is the given statement hateful?	1	yes
The following statement was labeled non-hateful by 50% annotators: the left wants you to believe that the word nigger defines a race but it does not it defines a character . Is the given statement hateful?	0	no
The following statement was labeled non-hateful by 50% annotators: we are literally going to have this taken down eventually it one thing if you are a kike it another if you are a kike dog . Is the given statement hateful?	0	no
The following statement was labeled non-hateful by 50% annotators: oomf just said ‘ they might not be nazi ’ they just hate jews ’ . Is the given statement hateful?	0	yes
The following statement was labeled non-hateful by 50% annotators: what part of they want to kill us regardless is so difficult to grasp that all i have been saying yet you lot are so erroneously laser focused on the jews that you are likely to let a moslem take you by the hand . Is the given statement hateful?	1	no
The following statement was labeled non-hateful by 50% annotators: i just want some titties man that it if i could wake up to some titties i d be fine . Is the given statement hateful?	1	no
The following statement was labeled non-hateful by 50% annotators: season <number> of 90 day fiance i have feelings about this seemingly cute couple danny white pa and amy biracial south africa . Is the given statement hateful?	1	non-hateful
The following statement was labeled non-hateful by 50% annotators: shannon sharpe is a nigger that talks like he has a mouthful of marbles . Is the given statement hateful?	0	yes
The following statement was labeled non-hateful by 50% annotators: <user> <user> i ain ’ t from br and i know this bitch word for word 😂 . Is the given statement hateful?	1	yes
The following statement was labeled non-hateful by 50% annotators: we are going to kill jews unequivocally and force them breed with niggers and sand niggers and spics . Is the given statement hateful?	0	hateful
The following statement was labeled non-hateful by 50% annotators: domestic violence is domestic violence regardless of the sex involved johnny depp . Is the given statement hateful?	1	non-hateful
The following statement was labeled non-hateful by 50% annotators: <user> <user> <user> <user> in the newspapers the guy used a samurai sword school attacks with samurai swords are really specific morné harmse white nerdy terrorist killed african people anton lundin pettersson white nerdy terrorist hate crime adam lanza white nerdy terrorist sexism . Is the given statement hateful?	1	non-hateful
The following statement was labeled non-hateful by 50% annotators: it is a sad day when the almighty shows you to your knees he commands you to care for women not rule over them give and take balance fairness you have clearly been burned maybe because your women would not live with your arrogance and latent misogyny . Is the given statement hateful?	0	no
The following statement was labeled non-hateful by 50% annotators: south africans should not come to the usa they should stay and fight if <number> m whites can not whip 1 0 x their number in niggers they are not real whites the usa will not save you we are a bunch of kiked out christian faggots not unlike yeah good luck pieter pooeters . Is the given statement hateful?	0	hateful
The following statement was labeled non-hateful by 50% annotators: twitter is a ghetto that wants to shut down divergent thought any time or effort placed on that platform is an utter waste do not use twitter as a barometer of success it rigged against us . Is the given statement hateful?	1	no
The following statement was labeled non-hateful by 50% annotators: <user> pakistan is created for muslims so no muslim refugee in india anymore . Is the given statement hateful?	1	non-hateful
The following statement was labeled non-hateful by 50% annotators: trump is a fucking kike liar . Is the given statement hateful?	0	yes
The following statement was labeled non-hateful by 50% annotators: no and legally no moeslimes get out of our usa . Is the given statement hateful?	0	yes
The following statement was labeled non-hateful by 50% annotators: mike enoch got his ass handed to him by a kid yid today his debate performances are worse than his work out routine . Is the given statement hateful?	1	no
The following statement was labeled non-hateful by 50% annotators: <user> looked through this guys account very islamaphobic we don ’ t need another one of those . Is the given statement hateful?	1	yes
The following statement was labeled non-hateful by 50% annotators: hey leave <user> alone his wife may be a horse faced kike but i personally saw chad punch a nigger square in the face at cville for a fat homosexual diabetes pusher he based . Is the given statement hateful?	0	yes
The following statement was labeled non-hateful by 50% annotators: <user> <user> <user> <user> they never said this help would include being ass raped by jimmy savile while the matrons watch -.- . Is the given statement hateful?	1	yes
The following statement was labeled non-hateful by 50% annotators: <number> sacks <number> fucking goddamn sacks are you fucking kidding me you fat retarded mongoloids better protect that goddamn soulless ginger jesus fucking christ <user> get your shit together . Is the given statement hateful?	0	yes
The following statement was labeled non-hateful by 50% annotators: <user> that ’ good to know i see homosexuality was made legal in india as far back as <date> 👍 🏾 . Is the given statement hateful?	1	non-hateful
The following statement was labeled non-hateful by 50% annotators: mudshark sunglasses to go with your mudshark milk shake . Is the given statement hateful?	0	non-hateful
The following statement was labeled non-hateful by 50% annotators: weev talks about killing and raping white women <user> ‍ talks about putting gook women over white women was this shooter apart of the anti white women mgtow stormer . Is the given statement hateful?	0	yes
The following statement was labeled non-hateful by 50% annotators: the constant sticking point here is in order to discuss large groups of people we have to deal in averages not individuals there are plenty of smart blacks obviously but there are way more dumb blacks than there are dumb white people or east asians . Is the given statement hateful?	0	no
The following statement was labeled non-hateful by 50% annotators: you ask niggas to be your peace and they end up being your piece of shit 😂 ✌ 🏽 june 29 wet it up pool party . Is the given statement hateful?	1	yes
The following statement was labeled non-hateful by 50% annotators: <user> <user> <user> <user> <user> a man of straw antifa have never killed everyone the far right white supremacist are major terrorist threats . Is the given statement hateful?	1	non-hateful
The following statement was labeled non-hateful by 50% annotators: <user> they convicted her because to let a white person shoot a black person in their own apartment and not convict would have led to riots . Is the given statement hateful?	1	non-hateful
The following statement was labeled non-hateful by 50% annotators: the left migrant children will undergo irreparable harm if they are separated from their mother or father also the left the nuclear family is outdated and in the event of divorce children should probably never see their dads also fag and dyke families are perfectly okay . Is the given statement hateful?	1	no
The following statement was labeled non-hateful by 50% annotators: <user> <user> white mode is elite . Is the given statement hateful?	1	non-hateful
The following statement was labeled non-hateful by 50% annotators: black arabs people made slaves of blacks african first then made slaves of white people who were called white gold worth a lot portuguese took from africa <number> million black slaves to brazil today <number> million africans are slaves to muslim masters so black america grow up . Is the given statement hateful?	1	non-hateful
The following statement was labeled non-hateful by 50% annotators: i fully support a race war to kill all kikes and niggers . Is the given statement hateful?	0	yes
The following statement was labeled non-hateful by 50% annotators: the cross is superior to the inferior crescent moon islam is beneath christianity judaism muslims pray against infidels fridayfeeling . Is the given statement hateful?	0	hateful
The following statement was labeled non-hateful by 50% annotators: people who say all lives matter are the same kind of people who comment about there not being a straight pride 🔔 🔚 . Is the given statement hateful?	1	non-hateful
The following statement was labeled non-hateful by 50% annotators: <user> <user> <user> no incitement but doxing teenage kids continuing to incite violence via antifa and calling for children to be raped is all done by liberals and democrats . Is the given statement hateful?	1	yes
The following statement was labeled non-hateful by 50% annotators: we do not need anymore shit the shitskins can go live with their shitskin cousins . Is the given statement hateful?	0	yes
The following statement was labeled non-hateful by 50% annotators: no it will not we are a movement not a group of atomized individuals you are a very stupid person btw you meant dregs but you have the vocabulary of a retarded nigger . Is the given statement hateful?	0	yes
The following statement was labeled non-hateful by 50% annotators: nope no evidence whatsoever it retarded horseshit . Is the given statement hateful?	1	yes
The following statement was labeled non-hateful by 50% annotators: video games cause violence me studying so i can be a good student in persona <number> hm . Is the given statement hateful?	1	non-hateful
The following statement was labeled non-hateful by 50% annotators: <number> should i fuck my mother before or after it comes out that he also a muzzie <number> would i not have to fuck my mother if i waited till it came out that he was a muzzie and then pointed that fact out . Is the given statement hateful?	0	no
The following statement was labeled non-hateful by 50% annotators: being a disgusting fat dike should be illegal . Is the given statement hateful?	0	yes
The following statement was labeled non-hateful by 50% annotators: □ heterosexual □ homosexual ■ minsung shipper . Is the given statement hateful?	1	non-hateful
The following statement was labeled non-hateful by 50% annotators: <user> this whole thread is chock full of white folks i am <number> i have been eating kale my whole life my grandma grew kale and collards in her garden of course we never ate it raw bc that wasn t a thing you all do not like it bc you do not really know it . Is the given statement hateful?	1	non-hateful
The following statement was labeled non-hateful by 50% annotators: let me apologize to those fine folks who followed me i just got busy with work have not had time to focus on gab i am a little retarded like that single minded if you will when time allows i will find some folks to follow become more active . Is the given statement hateful?	1	no
The following statement was labeled non-hateful by 50% annotators: bbc news this man is wanted by the police for ripping the hijab off a young moslem woman he also screamed racist abuse at her before running off laughing . Is the given statement hateful?	1	yes
The following statement was labeled non-hateful by 50% annotators: gabfam if it takes a civil war islam will be destroyed in america along with cair national . Is the given statement hateful?	0	no
The following statement was labeled non-hateful by 50% annotators: <user> sorry <user> but citizens of nyc can bail out their own citizen workers federal tax money is needed to take care of illegal immigrants in detention centers . Is the given statement hateful?	1	no
The following statement was labeled non-hateful by 50% annotators: <user> <user> most of their jokes revolve around the concept of finding new ways to detail a fictitious account of each others mother prostitute life who is a faggot and who is weak if he not willing to join in . Is the given statement hateful?	1	yes
The following statement was labeled non-hateful by 50% annotators: she single cuz she can not find a nigga worth her time ✍ 🏼 . Is the given statement hateful?	1	yes
The following statement was labeled non-hateful by 50% annotators: <user> donald probably tought he got raped or something . Is the given statement hateful?	1	no
The following statement was labeled non-hateful by 50% annotators: <user> lol nazi white trash is exactly like poor mexicans here theyre called colombias same balance of poor dumbness . Is the given statement hateful?	0	no
The following statement was labeled non-hateful by 50% annotators: it scary really the far left has successfully brainwashed most white kids of my generation into self hatred and white guilt i have literally been told by a hispanic that you can not enjoy football because you are white and that not racism to my peers unbelievable . Is the given statement hateful?	1	non-hateful
The following statement was labeled non-hateful by 50% annotators: chop stick with the wood send a nigga to jesus . Is the given statement hateful?	1	yes
The following statement was labeled non-hateful by 50% annotators: skank mudshark has to shop at the dollar store cause shes a single mom . Is the given statement hateful?	0	yes
The following statement was labeled non-hateful by 50% annotators: insanity but the millennial fools will suck it up yeah little white suburban snowflakes females go fuck a nigger for equality lmfao fools die . Is the given statement hateful?	0	yes
The following statement was labeled non-hateful by 50% annotators: when i was growing up you could go to a malt shop and order a black cow it was a coke with choc ice cream now it refers to fat nigger women . Is the given statement hateful?	0	yes
The following statement was labeled non-hateful by 50% annotators: dear muslims take heed on your actions cause much is to be said to a country who has shooting ranges and women can shoot back and men can shoot natshit out of pepper so get on ur rug and pray u are gonna need it . Is the given statement hateful?	0	yes
The following statement was labeled non-hateful by 50% annotators: y ’ all got all the hoes . Is the given statement hateful?	1	yes
The following statement was labeled non-hateful by 50% annotators: yes the bear and eagle imagination equivalent to a nigger . Is the given statement hateful?	0	yes
The following statement was labeled non-hateful by 50% annotators: <user> happy belated bday muzzy excited to see where <number> takes you 🕺 🏼 👊 🏻 . Is the given statement hateful?	1	non-hateful
The following statement was labeled non-hateful by 50% annotators: <user> progressives socialists democrats know their only way to stay in power is through illegal aliens americans know they do not care about us . Is the given statement hateful?	1	yes
The following statement was labeled non-hateful by 50% annotators: somehow i lost track of how many men i have slept with but i can still name all the women . Is the given statement hateful?	1	non-hateful
The following statement was labeled non-hateful by 50% annotators: <user> it de blasio a libtard illegal and moslem supporter . Is the given statement hateful?	0	yes
The following statement was labeled non-hateful by 50% annotators: looks like lee rigby beheading must have happened on a moslem holy day since they carried out the manchester attack on it anniversary i see a market for t shirts that say wearer carries bacon bits to send moslems to hell do not blow near me . Is the given statement hateful?	0	yes
The following statement was labeled non-hateful by 50% annotators: curanis are nigger jews . Is the given statement hateful?	0	yes
The following statement was labeled non-hateful by 50% annotators: there is no epidemic of gun violence in america quite the opposite in fact but last week shooting at a high school in florida was a grim and jarring reminder of deep cultural problems lurking just beneath the veneer of our materially comfortable society . Is the given statement hateful?	1	non-hateful
The following statement was labeled non-hateful by 50% annotators: i am not the majical hefer that can save sucker boys from being chimp niggers they desperately search for titties to latch on to here a solution call me crazy stop being a sucker . Is the given statement hateful?	0	yes
The following statement was labeled non-hateful by 50% annotators: and do not get me wrong either i only have a few muted i did not enjoy another clown telling me that sharia was the only way and women should submit or die i do not have time for that shit especially with a household full of ladies including the cat . Is the given statement hateful?	1	no
The following statement was labeled non-hateful by 50% annotators: just what we need a sandnigger goatfucker for governor ffs . Is the given statement hateful?	0	yes
The following statement was labeled non-hateful by 50% annotators: <user> i hate you . Is the given statement hateful?	0	yes
The following statement was labeled non-hateful by 50% annotators: <user> so its not only old muzzy men who are pedophiles muzzy women can marry little children too . Is the given statement hateful?	0	no
The following statement was labeled non-hateful by 50% annotators: lasvegasshooting lasvegas who do u trust isis fbi msm so far isis greater credibility and now dominate narrative in muslim world what westerners believe utterly irrelevant isis winning muslim hearts and minds who dominate through rape crime impudence violence in modern west . Is the given statement hateful?	0	yes
The following statement was labeled non-hateful by 50% annotators: <number> taxi drivers sentenced and <number> more suspended in newcastle for raping and grooming children why is not this headline news bbc i will tell you it is because they are all pakistani heritage muslims who single out white children to groom and rape ignored by our liberal elite . Is the given statement hateful?	1	yes
The following statement was labeled non-hateful by 50% annotators: i think you indeed can call people nigger if you so please . Is the given statement hateful?	0	yes
The following statement was labeled non-hateful by 50% annotators: as tears ran down cardinal timothy dolan fat cheeks he begged that all the refugee immigrant muds not be deported for he knew he needed a fresh supply of brown boy meat racistfanfiction . Is the given statement hateful?	0	yes
The following statement was labeled non-hateful by 50% annotators: black race sucks because i am surrounded by pot smoking unemployed welfare leeching niglet making prison worthy niggers and i hate them . Is the given statement hateful?	0	yes
The following statement was labeled non-hateful by 50% annotators: i got in trouble with the twitters for messing with bots what a fucking nigger . Is the given statement hateful?	0	yes
The following statement was labeled non-hateful by 50% annotators: <user> not our problem we are not the only nation in the entire world who can save those illegal aliens p.s. refugee has a very specific legal meaning and you are purposely misusing it in order to euphemize illegal immigration . Is the given statement hateful?	1	no
The following statement was labeled non-hateful by 50% annotators: <user> loving the new season of your show when you said go be a nigger somewhere else i laughed so hard people at work wanted to know what was funny keep it up and god speed . Is the given statement hateful?	1	yes
The following statement was labeled non-hateful by 50% annotators: you traded the flh for the ninja do not be offended but i call sport bikes nigger killers . Is the given statement hateful?	0	yes
The following statement was labeled non-hateful by 50% annotators: <user> pakistan bangladesh are muslim majority nations both persecute their minorities brutally so it is important that india give shelter to hindus sikhs jains buddhists christians from these nations wth is muslim refugees pak bd are killing muslims too . Is the given statement hateful?	1	non-hateful
The following statement was labeled non-hateful by 50% annotators: <user> <user> what a butthurt wigger . Is the given statement hateful?	0	yes
The following statement was labeled non-hateful by 50% annotators: i am so tired of these kike terrorists and their evil lackeys . Is the given statement hateful?	0	yes
The following statement was labeled non-hateful by 50% annotators: you all be wanting a real bitch then do not know what to do wit her ✌ 🏽 . Is the given statement hateful?	1	yes
The following statement was labeled non-hateful by 50% annotators: shuttener of kike banks . Is the given statement hateful?	0	yes
The following statement was labeled non-hateful by 50% annotators: <user> i love dykes fr . Is the given statement hateful?	1	non-hateful
The following statement was labeled non-hateful by 50% annotators: you are not even white ya fucking kike suck that fuentes spic dick more fake ass kike moonman . Is the given statement hateful?	0	yes
The following statement was labeled non-hateful by 50% annotators: i am not apart of the black community my community is the circle i have created comprised of people i love and respect i was raised around my black relatives but not ghetto black culture there is a huge difference between marvin gaye and snopp dog . Is the given statement hateful?	1	non-hateful
The following statement was labeled non-hateful by 50% annotators: we owe it to them to give them a real holocaust this time it the just and noble thing to do . Is the given statement hateful?	0	non-hateful
The following statement was labeled non-hateful by 50% annotators: doubt you are even white but if you marry a niggress nothing of value would be lost i mean you can not even form good arguments your black kids will probably be smarter than you too . Is the given statement hateful?	0	yes
The following statement was labeled non-hateful by 50% annotators: of course his white ass dropped it . Is the given statement hateful?	1	yes
The following statement was labeled non-hateful by 50% annotators: memes calling non jews the vicitms of the jew didnt exist a year ago people are beginning to understand the many ways that we are the victims of the jews jew are not the victims we are victims of jewish infiltration . Is the given statement hateful?	0	non-hateful
The following statement was labeled non-hateful by 50% annotators: that because the citizens are picking up the slack for the trash the muzzies don t pay for just generate . Is the given statement hateful?	0	no
The following statement was labeled non-hateful by 50% annotators: before anyone passes judgement i wanna let it be known that im <percent> trailer trash . Is the given statement hateful?	1	no
The following statement was labeled non-hateful by 50% annotators: <user> yeah but would you kill all the interns . Is the given statement hateful?	1	non-hateful
The following statement was labeled non-hateful by 50% annotators: gab is a retarded con game run by <number> year old faggs . Is the given statement hateful?	0	yes
The following statement was labeled non-hateful by 50% annotators: do you think admitted mudshark and slit licker <user> looks like . Is the given statement hateful?	0	yes
The following statement was labeled non-hateful by 50% annotators: i fucking hate kids they ’ re demons . Is the given statement hateful?	0	yes
The following statement was labeled non-hateful by 50% annotators: i fucking hate when my packages are delivered by fedex just leave them in the fucking front goddamit i paid for <number> day shipping at <user> for these dumb asses to not deliver my package bc nobody is there ups would never . Is the given statement hateful?	1	yes
The following statement was labeled non-hateful by 50% annotators: hoe you can not touch this . Is the given statement hateful?	1	yes
The following statement was labeled non-hateful by 50% annotators: shalom aussie goyim my name is gladys berejiklian i call myself an armenian but in fact i am a ratfaced kike looking to implement communism in your country do you like my gallah beak . Is the given statement hateful?	0	yes
The following statement was labeled non-hateful by 50% annotators: <user> <user> <user> we need the media to quit making everything about race according to them every white person is a white supremacist and yes i blame the media . Is the given statement hateful?	1	non-hateful
The following statement was labeled non-hateful by 50% annotators: sessions cites bible to defend separating immigrant families hotpagenews com r <number> . Is the given statement hateful?	1	non-hateful
The following statement was labeled non-hateful by 50% annotators: dislike food eggplant capsicum paprika favourite colour yellow charm point mole at the mouth strong point brave weak point too serious favourite fashion black and white with only the shoes in colours cap hat . Is the given statement hateful?	1	non-hateful
The following statement was labeled non-hateful by 50% annotators: bad drunk dick in her throat skrt skrt this nigger . Is the given statement hateful?	0	yes
The following statement was labeled non-hateful by 50% annotators: although it sounds like too much voter id should be looked into with a different reasoning the illegal immigrants have no right to vote for that matter they also have no rights that citizens have some way of stopping them from voting till they are deported or nationalized . Is the given statement hateful?	1	no
The following statement was labeled non-hateful by 50% annotators: <user> i adore the plump all white one reminds me of one of my boys <happy> i tried one of those kobo sp dog treat dispensers and my lot just ate through it to get at the treats lol love how happy they all look x . Is the given statement hateful?	1	no
The following statement was labeled non-hateful by 50% annotators: <user> you are cute 😘 💋 . Is the given statement hateful?	1	non-hateful
The following statement was labeled non-hateful by 50% annotators: <user> deadass italians from sicily refuse to claim whiteness because like apparently in the 1 6 0 0 there were africans on the island i am not fucking kidding i have had this exact convo w multiple italians who all say the same thing and for some reason refuse to identify as white . Is the given statement hateful?	1	non-hateful
The following statement was labeled non-hateful by 50% annotators: <user> do it i wanna get the actual words white trash in metallica font somewhere on me lol . Is the given statement hateful?	1	no
The following statement was labeled non-hateful by 50% annotators: piss off kike . Is the given statement hateful?	0	yes
The following statement was labeled non-hateful by 50% annotators: bring back the p**n <censored> and kick the nazis off . Is the given statement hateful?	1	yes
The following statement was labeled non-hateful by 50% annotators: <user> i can not decide darlifra is a fucking conservative nightmare but cross ange makes a rape victim apologize for being raped among many egregious offenses it like choosing between burning at the stake and being caught in a volcanic explosion . Is the given statement hateful?	1	no
The following statement was labeled non-hateful by 50% annotators: last week i ate at a new hipster bbq restaurant and heard the most god awful nigger noise ever blaring from the speakers it turned out to be what apparently passes for country music these days what the fuck happened . Is the given statement hateful?	0	yes
The following statement was labeled non-hateful by 50% annotators: justin looking mighty fine in his white polo shirt . Is the given statement hateful?	1	no
The following statement was labeled non-hateful by 50% annotators: you can be ghetto and not be ratchet i ’ m ghetto for sure but fighting all the time is ugly . Is the given statement hateful?	1	non-hateful
The following statement was labeled non-hateful by 50% annotators: <user> <user> because in <number> the republican party is a clown car full of white nationalists and conspiracy crackpots who are easily exploited by fox news and hordes of supplement selling grifters funded by billionaires who will not rest until they are trillionaires and the rest of us are slaves . Is the given statement hatefu…	1	yes
The following statement was labeled non-hateful by 50% annotators: eww a mudshark with a niglet . Is the given statement hateful?	0	yes
The following statement was labeled non-hateful by 50% annotators: <user> why is it the left can bring up charges on just about anyone they wish and the right sits back and watches can the senate not bring charges of judiciary misconduct foreign interference slander or perhaps harassment against them maybe the abuse of power for the past <number> years . Is the given statement hateful?	1	non-hateful
The following statement was labeled non-hateful by 50% annotators: this is the shooter — nasim aghdam a muzzie immigrant from iran . Is the given statement hateful?	0	yes
The following statement was labeled non-hateful by 50% annotators: think about you i dream about you i talk about you i smile about you i cry about you i love you i hate you i need you so bad . Is the given statement hateful?	1	non-hateful
The following statement was labeled non-hateful by 50% annotators: <user> first time twitter deleted a remark i made about the muzzie scum i deleted my account i do not need twitter . Is the given statement hateful?	0	yes
The following statement was labeled non-hateful by 50% annotators: <user> the bad bitch life is not for everyone . Is the given statement hateful?	1	yes
The following statement was labeled non-hateful by 50% annotators: <user> my illegal alien maid confidently told me last year how proud she was to have voted for hillary and i voted for my husband too she told me . Is the given statement hateful?	1	no
The following statement was labeled non-hateful by 50% annotators: butt bois take the side of fag deroofing raghead invaders over meek christers because they know they can abuse the latter without retaliation . Is the given statement hateful?	0	yes
The following statement was labeled non-hateful by 50% annotators: can put your money on the retard commentator saying after <number> seconds west brom have made a better start than they did in this fixture last season . Is the given statement hateful?	1	yes
The following statement was labeled non-hateful by 50% annotators: personally i would prefer to see chimps with rpgs move into the house next door than let more muslims have access to nuke technology people who think more muzzies with a bombs would be wonderful can explain themselves . Is the given statement hateful?	0	yes
The following statement was labeled non-hateful by 50% annotators: but he a spic so the jury figured that was excusable fuck daca fuck sanctuary cities fuck immigration fuck democrats may an earthquake destroy frisco . Is the given statement hateful?	0	yes
The following statement was labeled non-hateful by 50% annotators: hurr durr such savagery if our civilization dies out roaming negros rape women like the soviet army occupation of <number> at least we will not have given into savagery hurr durr victorian england was so patriarchal and savage hurr durr these brown matriarchal people are so civilized <user> . Is the given statement hateful?	0	yes
The following statement was labeled non-hateful by 50% annotators: those that are for illegal immigration and islamic culture refugees are idiot liberal progressives and globalists shills . Is the given statement hateful?	0	yes
The following statement was labeled non-hateful by 50% annotators: you get flak when you are over the target but you do not hit a moslem target if there are not dead kids used as human shields . Is the given statement hateful?	1	no
The following statement was labeled non-hateful by 50% annotators: breaking news sara is a misandrist bitch and race baiting cunt oh wait that not news that just what you do every fucking day . Is the given statement hateful?	0	yes
The following statement was labeled non-hateful by 50% annotators: <user> <user> muslim have <number> muslim country why they not taking refugee from bangladesh in there country why muslim refugee just want to come in europe india and america . Is the given statement hateful?	1	non-hateful
The following statement was labeled non-hateful by 50% annotators: <user> i get that about once a week fuck twitter and their protect illegal aliens and trump hating censors . Is the given statement hateful?	0	yes
The following statement was labeled non-hateful by 50% annotators: i don ’ t hate you i ’ m just disappointed you turned into everything you said you ’ d never be 🙁 . Is the given statement hateful?	1	non-hateful
The following statement was labeled non-hateful by 50% annotators: <user> <user> why does the little nazi have a blue checkmark . Is the given statement hateful?	1	non-hateful
The following statement was labeled non-hateful by 50% annotators: ayo hol up who did not pick moon man moon man pull pull the trigger on ever y nigger fam moon man shooting niggers while he snickers moon man the one man klan . Is the given statement hateful?	0	yes
The following statement was labeled non-hateful by 50% annotators: the sephardics never whitewashed themselves they are true brownie jew arabs . Is the given statement hateful?	0	no
The following statement was labeled non-hateful by 50% annotators: blacks invented reading . Is the given statement hateful?	1	non-hateful
The following statement was labeled non-hateful by 50% annotators: <user> <user> <user> <user> illegal muslims are not india responsibility why dont muslims countries give them refugee why they call themselves muslim countries if they dont want to give refuge to muslims . Is the given statement hateful?	1	non-hateful
The following statement was labeled non-hateful by 50% annotators: individual faggots are tolerable so long as they stay in their lane and keep things discrete a society that promotes and celebrates faggotry is doomed . Is the given statement hateful?	0	yes
The following statement was labeled non-hateful by 50% annotators: <user> <user> <user> <user> <user> <user> <user> <user> <user> <user> <user> <user> <user> <user> <user> <user> <user> <user> <user> <user> <user> <user> <user> <user> <user> ur r shudh <number> percent photoshop fake jihadi . Is the given statement hateful?	1	non-hateful
The following statement was labeled non-hateful by 50% annotators: <user> some white ass names . Is the given statement hateful?	1	yes
The following statement was labeled non-hateful by 50% annotators: i don ’ t like any bitch that says he him lesbians aren ’ t valid . Is the given statement hateful?	1	yes
The following statement was labeled non-hateful by 50% annotators: it would really break my heart to see that nigger come out of the hospital with a vicious staph infection . Is the given statement hateful?	1	yes
The following statement was labeled non-hateful by 50% annotators: omg this is how to deal with the faggots and immigrants from lesbia so fucking funny crowder is a genius . Is the given statement hateful?	0	yes
The following statement was labeled non-hateful by 50% annotators: yep communist nigger fag . Is the given statement hateful?	0	yes
The following statement was labeled non-hateful by 50% annotators: <user> <user> is not chad one of those shithole countries tromp talked about 🤔 . Is the given statement hateful?	0	yes
The following statement was labeled non-hateful by 50% annotators: y know how rich black athletes move from the ghetto into the mansion district and immediately try to turn their new neighborhood into an upscale ghetto that is exactly what the liberals migrating to fl are doing turning it into a purple state go back to your liberal northern shit holes . Is the given statement hateful?	0	yes
The following statement was labeled non-hateful by 50% annotators: <user> you mean illegal immigrants . Is the given statement hateful?	1	non-hateful
The following statement was labeled non-hateful by 50% annotators: <user> <user> <user> leave your brother alone time will kill all that stupidity anto na obinna . Is the given statement hateful?	1	no
The following statement was labeled non-hateful by 50% annotators: just a part of their victimhood narrative the only target of anger should be their own in wakanda who sold them to the jews and arabs really they need to be repatriated by force no exceptions even dr carson . Is the given statement hateful?	0	non-hateful
The following statement was labeled non-hateful by 50% annotators: they have no water no food but breed exponentially the human race is fucking retarded world water day . Is the given statement hateful?	1	yes
The following statement was labeled non-hateful by 50% annotators: i disagree those you list are normally covered by the term sub continent asians are thai malay burmese indonesian etc . Is the given statement hateful?	1	non-hateful
The following statement was labeled non-hateful by 50% annotators: antifa domestic terrorists elderly people can be nazis kk being old does not exempt you from criticism terrorists murder people antifa has not killed anyone kk neo nazis white supremacists have killed thousands . Is the given statement hateful?	1	non-hateful
The following statement was labeled non-hateful by 50% annotators: as a white person i am sick and tired of being judged by the colour of my skin by people who have complained for decades about being judged by the colour of theirs . Is the given statement hateful?	1	non-hateful
The following statement was labeled non-hateful by 50% annotators: well shit man mup da doo i would sit here and nigger post back and forth with your dumbass all night but i gotta make bread in the morning . Is the given statement hateful?	0	yes
The following statement was labeled non-hateful by 50% annotators: europe is being destroyed by the kike eu which is run by the crypto kike juncker to destroy whites . Is the given statement hateful?	0	yes
The following statement was labeled non-hateful by 50% annotators: <user> good job scamming you fucking faggot . Is the given statement hateful?	0	yes
The following statement was labeled non-hateful by 50% annotators: big drunk lean no guns shootin this nigger . Is the given statement hateful?	0	yes
The following statement was labeled non-hateful by 50% annotators: so you are who kike central sent to gab to stop shoah <number> electric boogaloo i realize team kike is spread thin with so many websites to keep the goyim from knowing on but fuck how well are you sleeping these days . Is the given statement hateful?	0	yes
The following statement was labeled non-hateful by 50% annotators: hahahaha the greasy nigger slid right off 😹 . Is the given statement hateful?	0	yes
The following statement was labeled non-hateful by 50% annotators: i am an ashkenazi jew . Is the given statement hateful?	1	non-hateful
The following statement was labeled non-hateful by 50% annotators: a birthday action game character that is not a queer bee . Is the given statement hateful?	1	non-hateful
The following statement was labeled non-hateful by 50% annotators: can you believe this brokedy broke nigger was over here with a white bitch in the park kissing seriously the white bitch more fucked up then the niggers are is not that like raping the handicapped seriously why would a white bitch choose a nigger <number> she be retarded drugged to . Is the given statement hateful?	0	yes
The following statement was labeled non-hateful by 50% annotators: yet another sand nigger heard from . Is the given statement hateful?	0	yes
The following statement was labeled non-hateful by 50% annotators: do you see that nice black and orange fish with a nice grin over there . Is the given statement hateful?	1	no
The following statement was labeled non-hateful by 50% annotators: it seems that a lot of immigrants have gotten fired for showing up for protests rather than work as i see it that an appropriate punishment try not showing up for work while in the military and see what happens any military not just the usa . Is the given statement hateful?	1	non-hateful
The following statement was labeled non-hateful by 50% annotators: happy eid al adha to out muslim brothers and sisters ❤ ️ . Is the given statement hateful?	1	non-hateful
The following statement was labeled non-hateful by 50% annotators: most jewish writings indicate that what we call a superiority complex is combined with a persecution complex sprinkled with paranoia how else can it be explained that jews are so universally fixated on the alleged <number> million jews who supposedly died in the holocaust . Is the given statement hateful?	0	non-hateful
The following statement was labeled non-hateful by 50% annotators: they are planting evidence suggesting that europe was moslem land to make moslems feel more entitled and the native europeans feel more guilty therefore easier to submit and surrender to islam it psychological warfare . Is the given statement hateful?	1	non-hateful
The following statement was labeled non-hateful by 50% annotators: whoever is having sex rn have some for me to 😂 lucky bastards . Is the given statement hateful?	1	no
The following statement was labeled non-hateful by 50% annotators: the national health serivces of the uk making tax payers pay for insanity biological men who regard themselves as women are being invited for cervical smear tests – even though it is impossible for them to have a cervix – an official guidebook states . Is the given statement hateful?	1	no
The following statement was labeled non-hateful by 50% annotators: aa crazy rich asians and never been kissed for today . Is the given statement hateful?	1	no
The following statement was labeled non-hateful by 50% annotators: too many of us dying for no reason that shit could ve been prevented she was a trigger happy ass white bitch . Is the given statement hateful?	1	yes
The following statement was labeled non-hateful by 50% annotators: do not blame the gutterslut nature of modern women on her husband that kike feminism talking . Is the given statement hateful?	0	yes
The following statement was labeled non-hateful by 50% annotators: <user> btw i need numbers people all my friends left my fat white ass . Is the given statement hateful?	1	yes
The following statement was labeled non-hateful by 50% annotators: let us not forget the kk was and is an honorable crowd they formed to protect white women from the nigger predation and whites in general from nigger crimes niggers have iq of <number> and high testosterone they have to be dealt with have to . Is the given statement hateful?	0	yes
The following statement was labeled non-hateful by 50% annotators: saint sir adolf was the most lied about person in history for financial political and kike reasons alt right history lesson . Is the given statement hateful?	0	no
The following statement was labeled non-hateful by 50% annotators: you are a truly pitiful excuse for a homo sapiens pitiable pathetic i pity your kids if you have any growing up with a role model like you sad tragic . Is the given statement hateful?	1	yes
The following statement was labeled non-hateful by 50% annotators: loretta lynch some white in her woodpile remember when she addressed muslims in america i will protect your rights what about the rights of americans not to be raped and abused by islam just another token tutsoon . Is the given statement hateful?	0	yes
The following statement was labeled non-hateful by 50% annotators: kill a muslim family every day kill the muslim terrorists from the root facebook employs muslim mother fuckers and they support muslim umma fuckers in facebook zuckerberg is a muslim supporter and a traitor . Is the given statement hateful?	0	yes
The following statement was labeled non-hateful by 50% annotators: but violating it will not look at the entire structure of censorship sjws need the <number> billion muzzies as cannon fodder for the war on the west but they do not want sharia law prince whatshisname does he is not calling the shots cultural marxists are . Is the given statement hateful?	0	non-hateful
The following statement was labeled non-hateful by 50% annotators: <user> i got raped by an alien did not i . Is the given statement hateful?	1	non-hateful
The following statement was labeled non-hateful by 50% annotators: <user> every white person in your classroom is gonna hate you . Is the given statement hateful?	1	non-hateful
The following statement was labeled non-hateful by 50% annotators: <user> ‍ good job with jf for a thot also it makes me sad hearing a girl my age having the same anxiety about society that i do but it justifying at the same time also also the saying nigger test should be the front line in the fight for free speech . Is the given statement hateful?	0	no
The following statement was labeled non-hateful by 50% annotators: well if it works for you two thats all that counts however when u post silly drivel here about doormat women then people may question your uh veracity . Is the given statement hateful?	1	no
The following statement was labeled non-hateful by 50% annotators: <user> they are illegal immigrants not asylum seekers . Is the given statement hateful?	1	no
The following statement was labeled non-hateful by 50% annotators: kill the jews . Is the given statement hateful?	0	yes
The following statement was labeled non-hateful by 50% annotators: you are replying to torbas post in defence of a kike that calls people goys you seem to of forgot jews killed jesus the first problem is people like you jews are next you will be gassed first . Is the given statement hateful?	0	yes
The following statement was labeled non-hateful by 50% annotators: maybe trump will care about his supporters when he done sucking kike cock too bad there no end in sight . Is the given statement hateful?	0	yes
The following statement was labeled non-hateful by 50% annotators: pussy nigger loving loser . Is the given statement hateful?	0	yes
The following statement was labeled non-hateful by 50% annotators: <number> dogs are gods greatest creation probably why mudslimes hate them . Is the given statement hateful?	0	yes
The following statement was labeled non-hateful by 50% annotators: the moslem is not the terrorist having a caucasian or some other race member as the terrorist in order to reaffirm msm narrative that terrorism has nothing to do with islam and all whites are bad . Is the given statement hateful?	0	non-hateful
The following statement was labeled non-hateful by 50% annotators: lol i tell ya what now your going old school i have not heard tarbaby in a long time . Is the given statement hateful?	1	non-hateful
The following statement was labeled non-hateful by 50% annotators: <user> i love warsaw i am american but i have got a lot of good friends there the nightlife is great and the cost of living is nice too not too many refugees at least not yet . Is the given statement hateful?	1	non-hateful
The following statement was labeled non-hateful by 50% annotators: <user> ideal image girl it was full of white oriole so i wasn t surprised but i figured since they claimed to have the laser i would be good they were so dramatic i about it too like i will never go there again . Is the given statement hateful?	1	non-hateful
The following statement was labeled non-hateful by 50% annotators: some white ppl called me a stupid nigger last night . Is the given statement hateful?	1	yes
The following statement was labeled non-hateful by 50% annotators: i love the muslim unity amongst islamic nations how come they did not take in even one muslim refugee 🤔 . Is the given statement hateful?	1	non-hateful
The following statement was labeled non-hateful by 50% annotators: however now that gay men are being called transphobic you clutch your pearls first they came for the lesbians and i did not speak out because i wasn t a lesbian then they came for all women who dared to question and i did not speak out . Is the given statement hateful?	1	no
The following statement was labeled non-hateful by 50% annotators: khazars were terrible people who installed an oligarchy over ukraine whether or not you accept the khazars theory jews today fucking hate jesus and white christianity so either way these kikes are scum of the earth . Is the given statement hateful?	0	yes
The following statement was labeled non-hateful by 50% annotators: i think we are past the negotiation phase it time to issue an ultimatum all sand niggers and kikes out of america or get executed an invader . Is the given statement hateful?	0	hateful
The following statement was labeled non-hateful by 50% annotators: you are confusing ghetto niggas with christian blacks if you do not see a difference it because you have not associated with many christian blacks but then why would you you are an atheist you and i do share the common goal of stopping more anti white mongrels from invading america though . Is the given statement hateful?	0	non-hateful
The following statement was labeled non-hateful by 50% annotators: <user> she was fine until she said ghetto she tried it she rly did . Is the given statement hateful?	1	non-hateful
The following statement was labeled non-hateful by 50% annotators: cool i see white people having babies with asians and blacks at this moment . Is the given statement hateful?	1	non-hateful
The following statement was labeled non-hateful by 50% annotators: detention space for illegal immigrants oh my dare i say concentration camps gas the spics border war now in all seriousness detention camps are necessary you can not let beaners roam around raping and pillaging you have to lock up all the taco niggers until you are ready to remove them . Is the given statement hateful?	0	yes
The following statement was labeled non-hateful by 50% annotators: karma is a bitch . Is the given statement hateful?	1	yes
The following statement was labeled non-hateful by 50% annotators: there is a total onslaught against white nations worldwide and israel is a old age retirement village for barbaric khazar kikes it has become a refugees state for pedophiles do not believe me truth fears no investigation . Is the given statement hateful?	0	hateful
The following statement was labeled non-hateful by 50% annotators: he got blasted by some in that tweet then that jewish kike told him hey tribe lets getting oscarssogoysih trending will fox news show his tweet on that . Is the given statement hateful?	0	yes
The following statement was labeled non-hateful by 50% annotators: as long as you do not call them ugly kike whores you are probably fine my feminism allows men to respond to bitchy women as well preferably in a classy way myself included but i mean women like <user> are classy only in maga fantasyland using words like dyke and faggot deplorable . Is the given statement hateful?	0	yes
The following statement was labeled non-hateful by 50% annotators: ignoring the truth jc shannon <user> <date> <time> msm ignores sweden immigrant riots because it does not fit their narrative trump right again newsbusters org blogs nb nicho … . Is the given statement hateful?	1	non-hateful
The following statement was labeled non-hateful by 50% annotators: exactly if a low iq nigger from africa who can not read can understand islam i think i can understand kill the kuffar nothing subtle lost on me . Is the given statement hateful?	0	yes
The following statement was labeled non-hateful by 50% annotators: not me getting foundation on this white christian dior collar 🤒 🤒 . Is the given statement hateful?	1	non-hateful
The following statement was labeled non-hateful by 50% annotators: they look like plain ol pale skinned niggers to me that sheboon looks like some kind of mutant anyway with those chinky eyes . Is the given statement hateful?	0	yes
The following statement was labeled non-hateful by 50% annotators: i did not own any slaves my ancestors never owned a slave i work my ass off for every dollar i get so shove this crap up your bigoted thieving nigger ass ms never was a slave . Is the given statement hateful?	0	yes
The following statement was labeled non-hateful by 50% annotators: <user> coming from your position of power just mentioning it constitutes pressure you d understand that if you understood sexual harassment which you do not as your past history demonstrates you are by far the most ignorant person ever to serve in the white house case closed . Is the given statement hateful?	1	no
The following statement was labeled non-hateful by 50% annotators: but if white trash originated in african american slang it was middle class and elite whites who found the term most compelling and useful — and ultimately this is the crowd that made it part of popular american speech https :// thesocietypages org specials white trash . Is the given statement hateful?	1	non-hateful
The following statement was labeled non-hateful by 50% annotators: so tired of all this gay shit . Is the given statement hateful?	1	yes
The following statement was labeled non-hateful by 50% annotators: for all those who want to discuss or debate with me you shall uphold the ethics of a conversation or find yourself discredited for internet violence and your argument is automatically nullified muted yes i am the smartest being in the universe deal with it . Is the given statement hateful?	1	no
The following statement was labeled non-hateful by 50% annotators: denver has a black problem a muzzee prob and a wetback prob . Is the given statement hateful?	0	no
The following statement was labeled non-hateful by 50% annotators: i did not realize that <user> was still taking up valuable airspace on the radio i am thinking we probably need more leaders <user> as opposed to more self absorbed entertainers kike cantwell and anglin . Is the given statement hateful?	0	no
The following statement was labeled non-hateful by 50% annotators: god made the niggers he made them in the night he made them in a hurry and forgot to paint them white . Is the given statement hateful?	0	yes
The following statement was labeled non-hateful by 50% annotators: use coupon code “ holocaust denial ” for <number> odd at checkout . Is the given statement hateful?	1	yes
The following statement was labeled non-hateful by 50% annotators: i have bought three dresses on this trip they are all white and black i guess the lesson to be learned is that unconscious patriotism practicality . Is the given statement hateful?	1	non-hateful
The following statement was labeled non-hateful by 50% annotators: jewish altruism tax deductible action furthering jewish hegemony done in bad faith support of the adl splc aipac ect is tantamount to treason left on checked jews will always destroy their hosts given time jews act this way b c they are jews its their nature have a white christmas . Is the given statement hateful?	0	yes
The following statement was labeled non-hateful by 50% annotators: ugh time to be a pumpkin slut . Is the given statement hateful?	1	yes
The following statement was labeled non-hateful by 50% annotators: you must be removed from earth you gook trash . Is the given statement hateful?	0	yes
The following statement was labeled non-hateful by 50% annotators: <user> he blew out smoke as he looked at the other raising an eyebrow and smirking a little classic white trash over here . Is the given statement hateful?	1	yes
The following statement was labeled non-hateful by 50% annotators: it hasnt done naz shah vile muslim mp any harm for liking a tweet telling raped white children by paki muslins to keep their mouths shut for diversity has it fucking paedophile labour party . Is the given statement hateful?	1	yes
The following statement was labeled non-hateful by 50% annotators: not that we did not know before but the times are reporting the police did cover up the moslem rape gangs in rotherham they probably took part in them if you ask me of course silence from the pedo at the bbc this morning . Is the given statement hateful?	0	yes
The following statement was labeled non-hateful by 50% annotators: yes yes i know i know a hell of a lot about islam and the way it works khoebaha does not come across as a jihadist you however do mr porcupine . Is the given statement hateful?	1	no
The following statement was labeled non-hateful by 50% annotators: if anyone tries to tell you that gay lesbian people are pushing the genital preference conversation remind them that literally no homosexual on the planet would ever come up with the term genital preferences . Is the given statement hateful?	1	no
The following statement was labeled non-hateful by 50% annotators: gee <number> top gab fucks start a thread i wonder how many fake accounts are on this list a sand nigger a street shitter and chemo head walk into a social media site no joke . Is the given statement hateful?	0	yes
The following statement was labeled non-hateful by 50% annotators: nice deflection kike nothing to do with the subject matter you jews are all the same . Is the given statement hateful?	0	yes
The following statement was labeled non-hateful by 50% annotators: sincerely remorseful hang his worthless raghead ass asap murderous scum . Is the given statement hateful?	0	yes
The following statement was labeled non-hateful by 50% annotators: <user> dammit man get this ching chong shit off my feed . Is the given statement hateful?	0	yes
The following statement was labeled non-hateful by 50% annotators: <user> i ’ m not playing he ghetto as shit 😂 then why around there 💀 . Is the given statement hateful?	1	no
The following statement was labeled non-hateful by 50% annotators: this article pretends it the right doing all the violence and intimidation at street events . Is the given statement hateful?	1	non-hateful
The following statement was labeled non-hateful by 50% annotators: i could not care less about any other ideology than a pure white state the form of gov we have to me is almost irrelevant you only care about muh nigger equals such a punk faggot take your cucks and gtfo . Is the given statement hateful?	0	yes
The following statement was labeled non-hateful by 50% annotators: no he does not he fucking hates trump the kike is gaslighting you . Is the given statement hateful?	0	yes
The following statement was labeled non-hateful by 50% annotators: unknown artist describing jihad islam . Is the given statement hateful?	1	non-hateful
The following statement was labeled non-hateful by 50% annotators: this raghead is a brick short of a load . Is the given statement hateful?	0	yes
The following statement was labeled non-hateful by 50% annotators: england women scoring in the last minute of that netball competition to win gold is the greatest sporting moment in history . Is the given statement hateful?	1	non-hateful
The following statement was labeled non-hateful by 50% annotators: what inspire me is teaching african refugees how to program javascript what inspires me is finding out how to use maglev trains to get resources to the moon these are the challenges that tomorrow going to face . Is the given statement hateful?	1	non-hateful
The following statement was labeled non-hateful by 50% annotators: <user> remorseful my lilly white ass 😡 😡 😡 👌 👌 👌 👌 👌 👌 👌 👌 👌 👌 👌 👌 👌 . Is the given statement hateful?	1	no
The following statement was labeled non-hateful by 50% annotators: the white house is giving states the power to reject refugees from being resettled in their communities and this announcement all but guarantees that politicians will try to end refugee resettlement in our state completely . Is the given statement hateful?	1	non-hateful
The following statement was labeled non-hateful by 50% annotators: two questions <number> how did you get a picture of my dick <number> who the fuck put a kike star on it . Is the given statement hateful?	0	yes
The following statement was labeled non-hateful by 50% annotators: im sweet and don ’ t have the nature or guts to be rude bitchy prestige and sadly people take advantage of it . Is the given statement hateful?	1	non-hateful
The following statement was labeled non-hateful by 50% annotators: i tell all my hoes rake it up break it down back it up fuck it up fuck it up . Is the given statement hateful?	1	yes
The following statement was labeled non-hateful by 50% annotators: or perhaps you just wait until the nigglet is older to be a real thug make a crime and go to jail and there he meets dad in the neighbour cell . Is the given statement hateful?	0	no
The following statement was labeled non-hateful by 50% annotators: my problem with these kike lovers is not what they are not doing they are punching right that the problem if they want to keep their fuckin mouths shut fine . Is the given statement hateful?	0	yes
The following statement was labeled non-hateful by 50% annotators: <user> <user> the police union and this rag head woman has the nerve to get angry with him for calling out that racist cop . Is the given statement hateful?	1	yes
The following statement was labeled non-hateful by 50% annotators: that happened when you allow a rat yid in your country . Is the given statement hateful?	0	yes
The following statement was labeled non-hateful by 50% annotators: <user> ha this coming from a two time loser not to mention that she one of the if not the most corrupt person politician the usa has ever had she fails to mention that her popular win were from the illegal alien votes . Is the given statement hateful?	1	no
The following statement was labeled non-hateful by 50% annotators: <user> <user> <number> children have recently been raped in montgomery county maryland by illegal aliens some of those rapists had been previously deported but managed to reenter our country shame ice could not catch those criminals before innocent children had their lives changed forever . Is the given statement hateful?	1	no
The following statement was labeled non-hateful by 50% annotators: i want to put on makeup wear a skirt and sing along to songs acting like i am a fucking queer rockstar . Is the given statement hateful?	1	no
The following statement was labeled non-hateful by 50% annotators: ok let say ur all racist and shit and u just avoid black ppl like some racist fuckin nazi sure u dramatically lower ur odds of being the victim of brutal violence but is that really worth it . Is the given statement hateful?	0	yes
The following statement was labeled non-hateful by 50% annotators: free women rule hold your head up high wearing freedom pink hats and vagina costumes are for weaklings who support holding women down for sexual offenders with the initials bill clinton 🇺 🇸 👸 beyourownhero maga . Is the given statement hateful?	1	yes
The following statement was labeled non-hateful by 50% annotators: <user> obviously the founders wanted unlimited low iq immigrants to come here and live off of american taxpayers that the original vision white enslavement 😉 . Is the given statement hateful?	0	non-hateful
The following statement was labeled non-hateful by 50% annotators: sorry white men you are just begging to be cheated on vice . Is the given statement hateful?	1	yes
The following statement was labeled non-hateful by 50% annotators: count on it kikes . Is the given statement hateful?	0	no
The following statement was labeled non-hateful by 50% annotators: this is bad news for the children of millennial women if only <number> of millennial women want to be housewives that means that potentially <number> of their children will not get enough time and interaction with their mothers which is unhealthy i just wonder is <number> the floor <number> <number> . Is the given statement hatefu…	1	non-hateful
The following statement was labeled non-hateful by 50% annotators: <user> i think in <number> agreeing or not with gay marriage personally a lot of people concur with your sentiments for some it interferes with the practice of their religion what would you say to the gay marriage bake me a wedding cake scenario . Is the given statement hateful?	1	non-hateful
The following statement was labeled non-hateful by 50% annotators: no white person should ever work for any jew not ever for any reason . Is the given statement hateful?	0	hateful
The following statement was labeled non-hateful by 50% annotators: bro twitch is so retarded imagine banninf someone cus they broke a keyboard and labeling it as self harm bunch of fucking 🤡 work at twich bruh . Is the given statement hateful?	1	yes
The following statement was labeled non-hateful by 50% annotators: <user> woman beauty then she went on this woman instagram page and wrote disgusting comments on nearly every pic this woman posted saying why you so white you have no melanin ew he ugly he needs son regarding a baby saying her other grand kids was trailer trash etc . Is the given statement hateful?	1	yes
The following statement was labeled non-hateful by 50% annotators: lol you know the more middle eastern women i saw over there the more i came to understand why the men fuck goats . Is the given statement hateful?	0	no
The following statement was labeled non-hateful by 50% annotators: next time you hear someone bitching about jury duty remind them of today and the jury of <number> black people <number> hispanic asian and <number> wypipo that found this white woman ex cop guilty of killing a young black man we need us and our allies on juries . Is the given statement hateful?	1	non-hateful
The following statement was labeled non-hateful by 50% annotators: looks like we have some muzrat filth that has now ventured on to gab . Is the given statement hateful?	0	yes
The following statement was labeled non-hateful by 50% annotators: <user> <user> btw nice job threatening violence against an elected official you mongoloid . Is the given statement hateful?	0	yes
The following statement was labeled non-hateful by 50% annotators: hell yea bitch dis go hard as hell flocka i will suck big dick team slut all day and week month year and century i love big naps d i c k q u a d . Is the given statement hateful?	0	yes
The following statement was labeled non-hateful by 50% annotators: if in <number> the man i believe to be a criminal sexist racist xenophobic homophobic white supremacist was re elected i d move unless i do not really have a problem with someone being those things or i never believed he was those things to begin with trump 2020 kag maga . Is the given statement hateful?	1	yes
The following statement was labeled non-hateful by 50% annotators: i have found another degenerate who is pushing smut on gab not a joke he is actually promoting smut and porn <user> is a degenerate diversity kike hiding behind patriotism i am not so easily fooled . Is the given statement hateful?	0	yes
The following statement was labeled non-hateful by 50% annotators: <user> muslims voted for <user> bjp team b and got the government they deserve . Is the given statement hateful?	1	non-hateful
The following statement was labeled non-hateful by 50% annotators: <user> to late evil comes only in trojan horse as islam . Is the given statement hateful?	1	no
The following statement was labeled non-hateful by 50% annotators: yeh true but they have been moslem for a long time without bothering jews the jews living in palestine before <number> had good relations to them and even afterwards they thought that would continue to be the case under the genocide started <user> . Is the given statement hateful?	1	non-hateful
The following statement was labeled non-hateful by 50% annotators: <user> <user> that that white supremest hand code i hope you reported this it a terrorist threat . Is the given statement hateful?	1	non-hateful
The following statement was labeled non-hateful by 50% annotators: <user> republicans don ’ t hate gays . Is the given statement hateful?	1	non-hateful
The following statement was labeled non-hateful by 50% annotators: hey england time to ban bridges white vans and vigils the <percent> of you that are sick of loser muzzies need to sack up and take matters into your own hands ban islam ban muslims . Is the given statement hateful?	0	yes
The following statement was labeled non-hateful by 50% annotators: nigel farage edward the 8 th the brits should crown nigel before nignog babies inherit the throne . Is the given statement hateful?	0	no
The following statement was labeled non-hateful by 50% annotators: here are some new one groovin on down to gitmo krusin in kenya if your gay and you know it clap your hands treason is the reason . Is the given statement hateful?	1	no
The following statement was labeled non-hateful by 50% annotators: just had a talk with my dog and he agrees if a moslem or any other assorted brown person comes to a white country and has a bad time he can go back to his land where do we go when we have had enough of them . Is the given statement hateful?	0	yes
The following statement was labeled non-hateful by 50% annotators: did you see a sign outside my house that said dead nigger storage . Is the given statement hateful?	0	yes
The following statement was labeled non-hateful by 50% annotators: fuckin hippo doppelgänger negress . Is the given statement hateful?	0	yes
The following statement was labeled non-hateful by 50% annotators: moslem are nothing more than cockroaches that need to be exterminated from the planet . Is the given statement hateful?	0	hateful
The following statement was labeled non-hateful by 50% annotators: <user> <user> poverty is the worst form of violence . Is the given statement hateful?	1	non-hateful
The following statement was labeled non-hateful by 50% annotators: <user> its because stan twit hates on every white person 💀 💀 💀 like bro its not that serious . Is the given statement hateful?	1	non-hateful
The following statement was labeled non-hateful by 50% annotators: if white men r problem how come black mail is criminal an me a dog . Is the given statement hateful?	1	no
The following statement was labeled non-hateful by 50% annotators: why come wizards have so many towers . Is the given statement hateful?	1	non-hateful
The following statement was labeled non-hateful by 50% annotators: <user> no but someone got silk touch and placed one diamond block at level <number> to troll them haha retard . Is the given statement hateful?	1	yes
The following statement was labeled non-hateful by 50% annotators: i remember something to that effect gotta dig deeper for the pedo thing i may well have him mixed up with another yid with that name they are all demonic shapeshifters after all . Is the given statement hateful?	1	no
The following statement was labeled non-hateful by 50% annotators: 0 u0 lmao wow fuck you too 😂 😂 . Is the given statement hateful?	1	no
The following statement was labeled non-hateful by 50% annotators: maybe it a sign from god that anglin really is a nigger . Is the given statement hateful?	0	yes
The following statement was labeled non-hateful by 50% annotators: god dam i almost sneezed mah lung out i hope dis nigger air i am breathing ain t giving me aids . Is the given statement hateful?	0	yes
The following statement was labeled non-hateful by 50% annotators: top quotes from tonight include <user> saying they are a slytherin and proud because they are fucking queer 🐍 also gryffindor is so heteronormative and basic it for people who have the personality of bread and courage 🍞 🦁 bam ein publishing <user> . Is the given statement hateful?	1	no
The following statement was labeled non-hateful by 50% annotators: <user> <user> coming from someone who finds it necessary to kill all the cows in this country in the name of global warming . Is the given statement hateful?	1	non-hateful
The following statement was labeled non-hateful by 50% annotators: my wife and i agree <percent> let mother nature cull the nigger herd . Is the given statement hateful?	0	yes
The following statement was labeled non-hateful by 50% annotators: bisexuals lesbians 🤝 <number> being our year . Is the given statement hateful?	1	non-hateful
The following statement was labeled non-hateful by 50% annotators: lying kike filth the false dichotomy here is your false dichotomy between capitalism that mistreats workers and marxism guess what kike there is a capitalism by which workers and owners are complementary fascism . Is the given statement hateful?	0	yes
The following statement was labeled non-hateful by 50% annotators: <user> it okay to be white . Is the given statement hateful?	1	non-hateful
The following statement was labeled non-hateful by 50% annotators: real niggahs do not get in to that . Is the given statement hateful?	1	yes
The following statement was labeled non-hateful by 50% annotators: well i think nigeria would be alright if it wasn t for the moslem group boko haram oil revenues help but then always wants it for themselves i spent <number> weeks in abuja and the city functioned well with people out and about working and relatively productive . Is the given statement hateful?	1	non-hateful
The following statement was labeled non-hateful by 50% annotators: based poland will deploy the shrike force nigger cleanup robots . Is the given statement hateful?	0	yes
The following statement was labeled non-hateful by 50% annotators: when scrolling through uk newspaper headlines it becomes terribly obvious that uk is a cold hearted degenerate shithole it is no wonder that children are raped by muslim gangs for decades while most turn their backs . Is the given statement hateful?	0	yes
The following statement was labeled non-hateful by 50% annotators: punches my small gay ass . Is the given statement hateful?	1	yes
The following statement was labeled non-hateful by 50% annotators: never happen european men have been emasculated by their domineering women such as the swedes may and merkel and they have no weapons . Is the given statement hateful?	1	no
The following statement was labeled non-hateful by 50% annotators: tfb maybe if they were something other than thieving arab terrorist scum their fellow arabs might give a shit . Is the given statement hateful?	0	yes
The following statement was labeled non-hateful by 50% annotators: yah fucken filthy niggar . Is the given statement hateful?	0	yes
The following statement was labeled non-hateful by 50% annotators: yeah dis the ol profit see how fast the mudslimes teach him how to hang glide sans glider . Is the given statement hateful?	0	yes
The following statement was labeled non-hateful by 50% annotators: he is using a flat projection map to prove that shortest distance would not go through alaska on a globe he then saying it fine in un style map un style map actually makes northern hemisphere similar to globe map southern hemisphere is absolutely retarded on un map though . Is the given statement hateful?	1	no
The following statement was labeled non-hateful by 50% annotators: and there is nothing as bad as a filthy kike . Is the given statement hateful?	0	yes
The following statement was labeled non-hateful by 50% annotators: sadly many will swallow the lies add the twatter purge which no doubt western govs are also involved in europe is moving to totalitarian states be ready to fight for your freedom or be a subservient of islam moslemsaretheproblem . Is the given statement hateful?	0	yes
The following statement was labeled non-hateful by 50% annotators: perzactly move along go be a nigger somewhere else . Is the given statement hateful?	0	yes
The following statement was labeled non-hateful by 50% annotators: i am much higher time preference on this issue i do not want to pave a road i want to remove the jews from power to stop this deconstructionist anti white morass of misery they have forced on our communities . Is the given statement hateful?	0	yes
The following statement was labeled non-hateful by 50% annotators: fellas be careful she texting other niggas . Is the given statement hateful?	1	yes
The following statement was labeled non-hateful by 50% annotators: these two self serving pieces of crap are okay with possibly destroying a person livelihood who only being true to his religious beliefs who gave queers the moral high ground sick of this libtard lgbtq hypocrisy . Is the given statement hateful?	1	yes
The following statement was labeled non-hateful by 50% annotators: <user> jihad is mainly responsible and jihadi 🐖 like u r greatly responsible stop jihad and world will be much much peaceful 😠 . Is the given statement hateful?	1	non-hateful
The following statement was labeled non-hateful by 50% annotators: in hopes of finding good jewelries inside the treasure box yg lets go of the diamonds and picked up the golds . Is the given statement hateful?	1	non-hateful
The following statement was labeled non-hateful by 50% annotators: like someone said would not it be a hoot if a moslem bakery refused to bake a cake for a couple of faggots . Is the given statement hateful?	0	yes
The following statement was labeled non-hateful by 50% annotators: <user> i will drive my white ass down to dallas from new york and stand right there with you justice botham jean amber guyger murder trial life in prison . Is the given statement hateful?	1	no
The following statement was labeled non-hateful by 50% annotators: the diversity of violence is not so diverse . Is the given statement hateful?	1	non-hateful
The following statement was labeled non-hateful by 50% annotators: gas this kike . Is the given statement hateful?	0	yes
The following statement was labeled non-hateful by 50% annotators: too angry <number> b retarded 2 day . Is the given statement hateful?	1	yes
The following statement was labeled non-hateful by 50% annotators: i love ari fuck a hoe 😝 . Is the given statement hateful?	1	yes
The following statement was labeled non-hateful by 50% annotators: black women complain so much at restaurants 🤣 . Is the given statement hateful?	1	non-hateful
The following statement was labeled non-hateful by 50% annotators: just attacked one of them faggots feelin pretty good . Is the given statement hateful?	0	yes
The following statement was labeled non-hateful by 50% annotators: training rocky style to scare some loser inbred muzzie ass hamad an . Is the given statement hateful?	0	yes
The following statement was labeled non-hateful by 50% annotators: <user> it ’ d be an awful shame if nazis showed up and made things worse 🤔 . Is the given statement hateful?	1	non-hateful
The following statement was labeled non-hateful by 50% annotators: <user> <user> <user> yes u r ryt arabs are very decent they dont let u feel that we r from different religion . Is the given statement hateful?	1	non-hateful
The following statement was labeled non-hateful by 50% annotators: i bet every muslim that strapped a bomb on or drove a lorry into a crowd had just lost his benefits they are sick in the head . Is the given statement hateful?	0	yes
The following statement was labeled non-hateful by 50% annotators: but radical leftist propaganda and antifa websites are not dangerous right kys niggerfaggot . Is the given statement hateful?	0	yes
The following statement was labeled non-hateful by 50% annotators: <user> women were gang raped in his house is it true women body found in backside gutter kf tahir . Is the given statement hateful?	1	no
The following statement was labeled non-hateful by 50% annotators: you are the definition of a kike who mad because you did not manage to exterminate all the goyim . Is the given statement hateful?	0	yes
The following statement was labeled non-hateful by 50% annotators: it pretty much going that way here in america also only a matter of time before our women are raped and slaughtered in the name of islam . Is the given statement hateful?	0	hateful
The following statement was labeled non-hateful by 50% annotators: so the british government did not want you to hear a speech that raises awareness to the fact that the indigenous population is being replaced by muslim immigrants perhaps they are scared of the natives retaliating against this betrayal of the british people . Is the given statement hateful?	0	non-hateful
The following statement was labeled non-hateful by 50% annotators: <user> <user> one where they president is a mob boss and running a crime syndicate out of the white house . Is the given statement hateful?	1	non-hateful
The following statement was labeled non-hateful by 50% annotators: good morning to all the <number> ’ <number> <number> ’ <number> women . Is the given statement hateful?	1	non-hateful
The following statement was labeled non-hateful by 50% annotators: proof sand niggers invented math . Is the given statement hateful?	0	yes
The following statement was labeled non-hateful by 50% annotators: <user> the nazis like you got owned today owned . Is the given statement hateful?	1	non-hateful
The following statement was labeled non-hateful by 50% annotators: just another nigger heard form move along nothing new to see here . Is the given statement hateful?	0	yes
The following statement was labeled non-hateful by 50% annotators: mohammed was a pedophile rapist murdering slaving retarded sandnigger prove me wrong . Is the given statement hateful?	0	yes
The following statement was labeled non-hateful by 50% annotators: getting rid of the rich the businessmen and businesswomyn and whigger middle class would solve most of the problems once these inferiors can not lie steal and cheat most of their businesses will go under do not forget the jews lived in shitty smelly ghettos before being emancipated by satanic whiggers . Is the given statement hate…	0	yes
The following statement was labeled non-hateful by 50% annotators: call a doctor quick some moslem from a shit hole country has a severe case of the hurt feelings . Is the given statement hateful?	0	yes
The following statement was labeled non-hateful by 50% annotators: edina vs eden prairie is the grape nuts of high school sports . Is the given statement hateful?	1	non-hateful
The following statement was labeled non-hateful by 50% annotators: for once a moslem did a good thing one less future democrat voter and one less welfare check . Is the given statement hateful?	1	non-hateful
The following statement was labeled non-hateful by 50% annotators: so if jews are smarter than the average bear i guess their kryptonite is trains then or something hellnoitdidnthappenduh . Is the given statement hateful?	0	no
The following statement was labeled non-hateful by 50% annotators: that basically like being raped it pretty bad . Is the given statement hateful?	1	no
The following statement was labeled non-hateful by 50% annotators: <user> lol new york is a joke now 😂 😂 😂 yeah illegal aliens from all around the world should go back to their countries what is wrong with that . Is the given statement hateful?	1	yes
The following statement was labeled non-hateful by 50% annotators: paving the kike way goy . Is the given statement hateful?	0	yes
The following statement was labeled non-hateful by 50% annotators: i guess there are enough token niglets at the wedding . Is the given statement hateful?	0	no
The following statement was labeled non-hateful by 50% annotators: <user> <user> yea those people were immigrants too all one big melting pot of immigration lovely . Is the given statement hateful?	1	non-hateful
The following statement was labeled non-hateful by 50% annotators: british tourists to america were warned for years not to leave main freeways in their rental car there were a high number of cases of them being ambushed by blacks who saw rental plates and easy pickings the ghettos have never been safe for whites . Is the given statement hateful?	0	non-hateful
The following statement was labeled non-hateful by 50% annotators: <user> why donot those countries accept the muslims from all over the world if they are so empathetic . Is the given statement hateful?	1	non-hateful
The following statement was labeled non-hateful by 50% annotators: <user> <user> you do not support the queer community and u are a homophobe unless you listen to it let that sink in . Is the given statement hateful?	1	hateful
The following statement was labeled non-hateful by 50% annotators: in spoons three fishes table <number> dm for orders spoons slave fin sub spoons bitch findom spoons sub . Is the given statement hateful?	1	yes
The following statement was labeled non-hateful by 50% annotators: scholarship needed <number> of <number> gay and lesbian fiction on abortion i am already including chelsey johnson novel stray cat into the paper please note how you want your name to be listed only replies to my email of record will be acknowledged . Is the given statement hateful?	1	no
The following statement was labeled non-hateful by 50% annotators: <user> please beat these white bitches up . Is the given statement hateful?	0	yes
The following statement was labeled non-hateful by 50% annotators: <user> damn thoes legs 🥵 🥵 🥵 . Is the given statement hateful?	1	no
The following statement was labeled non-hateful by 50% annotators: yeah that dumb nigger just took all the evil of the kikes and blamed the nazis for it and actually expected someone to believe it i would call him jidf but he is so stupid i can smell the nigger stench through my screen . Is the given statement hateful?	0	yes
The following statement was labeled non-hateful by 50% annotators: two terms of that shit in the white house <user> . Is the given statement hateful?	1	yes
The following statement was labeled non-hateful by 50% annotators: say what you will about sand niggers but at least they know how to treat their women . Is the given statement hateful?	0	yes
The following statement was labeled non-hateful by 50% annotators: transgenderism is a fantastic away to remove queers from the gene pool . Is the given statement hateful?	0	hateful
The following statement was labeled non-hateful by 50% annotators: girls like a mix of protective let me be a slut . Is the given statement hateful?	1	no
The following statement was labeled non-hateful by 50% annotators: <user> <user> <user> <user> is there still a wall with snipers surrounding the white house you know the one built by immigrants with an immigrant residing in it . Is the given statement hateful?	1	no
The following statement was labeled non-hateful by 50% annotators: second post a b bitcoin from you on gabnews today are you moving into bitcoin business now thought you were on mission to bring justice to young raped victims all is good but just want to have a clear understanding in my own mind god bless america merry christmas . Is the given statement hateful?	1	no
The following statement was labeled non-hateful by 50% annotators: fat female scouts queers abound fuck em a new day has dawned . Is the given statement hateful?	0	yes
The following statement was labeled non-hateful by 50% annotators: <number> hours since a filthy muslim appeased allah and his imam by murdering americans and immediately the mayor is playing new yorkers into behaving like nothing has happened ffs america avenge new yorkers . Is the given statement hateful?	0	yes
The following statement was labeled non-hateful by 50% annotators: <user> <user> niggers do not get counted . Is the given statement hateful?	1	yes
The following statement was labeled non-hateful by 50% annotators: did <user> sponsor the anti trump violence today in berkeley berkeley berkeleyriots taxmarch maga . Is the given statement hateful?	1	non-hateful
The following statement was labeled non-hateful by 50% annotators: <user> <user> <user> and trump calls africa shithole countries as a joke and he calls immigrants animals as a joke and he calls black people varmin as a joke you are no different neither is <user> go take a look at yourself in the mirror . Is the given statement hateful?	1	yes
The following statement was labeled non-hateful by 50% annotators: free everybody out da jam even da opps so we can max them niggas tf out . Is the given statement hateful?	1	yes
The following statement was labeled non-hateful by 50% annotators: we should kill a white person every day until the grenfell residents are housed in mansions huffington post blogs . Is the given statement hateful?	0	hateful
The following statement was labeled non-hateful by 50% annotators: bare in mind there are only <number> million jews in the world give or take and billions of other people of all religions when the day comes you <number> million will be mincemeat this time not fertilizer . Is the given statement hateful?	0	no
The following statement was labeled non-hateful by 50% annotators: for <number> years i have been wondering why anyone thought retard and fatso and now ho were qualified to fact check anything when people quote snopes as their proof i laugh . Is the given statement hateful?	1	yes
The following statement was labeled non-hateful by 50% annotators: i was raised by my grandparents after wwii they moved to detroit from the south and were part of that economic growth then white flight to the more affluent and family friendly suburbs sad really as in the early 2 0 th century detroit was the paris of the midwest . Is the given statement hateful?	1	non-hateful
The following statement was labeled non-hateful by 50% annotators: you are either the worst shill or retarded no one is running around the streets yelling out nigger and jew but if you are gonna be one i am gonna say it so which one are you . Is the given statement hateful?	0	yes
The following statement was labeled non-hateful by 50% annotators: our retarded asses got so damn lit last night we just now waking up 😩 . Is the given statement hateful?	1	yes
The following statement was labeled non-hateful by 50% annotators: new the justice department is reportedly considering making it easier to deport immigrants who use public benefits reuters . Is the given statement hateful?	1	non-hateful
The following statement was labeled non-hateful by 50% annotators: it very telling that his mentions are full of white and mostly middle aged people telling him how right he is and how much they can relate the lack of self awareness will always astound me . Is the given statement hateful?	1	non-hateful
The following statement was labeled non-hateful by 50% annotators: russia and iran defeated isis what wrong with putin he helped liberated syria why do you think our greatest ally israel and the jews on the news media are demonizing iran syria and russia find any coincidences there . Is the given statement hateful?	1	non-hateful
The following statement was labeled non-hateful by 50% annotators: so essentially history was all done by white people whilst the brown devils kept trying to genocide us because we were gigantic red headed cannibals well this explains everything even trump . Is the given statement hateful?	0	yes
The following statement was labeled non-hateful by 50% annotators: if this faggot is not a kike then we are gonna need a new term for whatever he is b c shabbos goy simply does not do justice to this level of cuckoldry . Is the given statement hateful?	0	yes
The following statement was labeled non-hateful by 50% annotators: oy vey we would hear no end of vigils and prayers for innocent victims and of course no end of condemnation of white supremacy even when a zoo mali nigger drives over canadian pedestrians it white supremacy to blame be a good goy and learn your script lol . Is the given statement hateful?	0	yes
The following statement was labeled non-hateful by 50% annotators: <user> why d they all isra a muzzie . Is the given statement hateful?	1	yes
The following statement was labeled non-hateful by 50% annotators: one of the worst show to movie conversions ever last airbender i had succesfully forgotten about that hoe til i seen its on hulu . Is the given statement hateful?	1	yes
The following statement was labeled non-hateful by 50% annotators: we need more women in these fields perfect accelerationism and niggers especially nigger females . Is the given statement hateful?	0	yes
The following statement was labeled non-hateful by 50% annotators: i wanna get real physically intimate with friends ya know i wanna smooch and stuff with the ppl i care about thats how friendships work right . Is the given statement hateful?	1	non-hateful
The following statement was labeled non-hateful by 50% annotators: <user> she has guts at least her canadian values for immigrants policy is being skewered by our lefty media ad nauseum can she hold the line like trump did we will see . Is the given statement hateful?	1	non-hateful
The following statement was labeled non-hateful by 50% annotators: <user> this is a fucking terrible idea . Is the given statement hateful?	1	non-hateful
The following statement was labeled non-hateful by 50% annotators: you mean red pills like it ok to fuck half nigger apes and an ethnostate can not work in america because muh magic dirt that not a red pill cuck faggot that jew bullshit that she been pushing from the beginning if you think that helpful kys . Is the given statement hateful?	0	yes
The following statement was labeled non-hateful by 50% annotators: <user> <user> but that not an exclusive ace issue that a rape issue that like claiming straight white able bodied rich men are systematically oppressed because they can be raped anybody can be raped rapists do not care who you are they just want to rape . Is the given statement hateful?	1	non-hateful
The following statement was labeled non-hateful by 50% annotators: hey tie your shoes i do not want you falling for anyone else fine liereposposa atvistamall may mallshow si lie <user> . Is the given statement hateful?	1	no
The following statement was labeled non-hateful by 50% annotators: dead voters illegal immigrant voters felon voters they do not vote for republicans do they hehehehehe auditthevote . Is the given statement hateful?	1	no
The following statement was labeled non-hateful by 50% annotators: get you a ugly nigga we dont cheat . Is the given statement hateful?	1	yes
The following statement was labeled non-hateful by 50% annotators: clc first win and chuu teaser today is for the homosexuals . Is the given statement hateful?	1	no
The following statement was labeled non-hateful by 50% annotators: just promise me this even if i am <number> years old stink shit my pants and am dying from ball cancer do not put my brain in a nigger body plz . Is the given statement hateful?	0	yes
The following statement was labeled non-hateful by 50% annotators: i can ’ t believe i have class on fridays for the first semester ever so ghetto . Is the given statement hateful?	1	no
The following statement was labeled non-hateful by 50% annotators: why do not you move to the ghetto if you like blacks so much . Is the given statement hateful?	0	non-hateful
The following statement was labeled non-hateful by 50% annotators: i am research our favorite horror characters and they are all white men which might ve indicative of white male violence or lack of films particularly horror sci fi about black folks and by black folks . Is the given statement hateful?	1	non-hateful
The following statement was labeled non-hateful by 50% annotators: <user> <user> <user> <user> she got bullied away because of she is a white female rapper and had rough year after . Is the given statement hateful?	1	non-hateful
The following statement was labeled non-hateful by 50% annotators: <user> if you were the police officer getting off duty and thinking anyone black or white was in your apartment and they all look identical like a hotel and for that moment you drew your gun for self defense would you want to be charged with murder or manslaughter . Is the given statement hateful?	1	no
The following statement was labeled non-hateful by 50% annotators: imma start blocking anybody that post that lil ugly dyke haitian boy on the tl it disturbing af . Is the given statement hateful?	0	yes
The following statement was labeled non-hateful by 50% annotators: nazi is a kike jew term invented by an inbred schizoid kike rat they were called national socialists <number> gorillion were not gassed but should have been the world would be a much better place . Is the given statement hateful?	0	yes
The following statement was labeled non-hateful by 50% annotators: today is the jewish new year if the democrats were in the white house it would be the end of days for the jews . Is the given statement hateful?	1	no
The following statement was labeled non-hateful by 50% annotators: <user> <user> some might say it somewhat flippant to compare such an incident to the extermination of <number> million jews . Is the given statement hateful?	1	non-hateful
The following statement was labeled non-hateful by 50% annotators: stop running around like a little bitch . Is the given statement hateful?	1	yes
The following statement was labeled non-hateful by 50% annotators: i have played the wife role for dudes who only deserved a hoe that my fault tho . Is the given statement hateful?	1	yes
The following statement was labeled non-hateful by 50% annotators: some nigger gas lighted some other nigger in some niggers pm and associated us with other niggers and anglin took the bait . Is the given statement hateful?	0	yes
The following statement was labeled non-hateful by 50% annotators: except you are wrong there as usual whoisshooting com among other sites evince the niggery in your kike narrative btw the majority of pedos are black too fbi gov ucrs crimes against children families . Is the given statement hateful?	0	yes
The following statement was labeled non-hateful by 50% annotators: <user> well if she wants sharia law she ’ going to reignite the war of muslim law against america . Is the given statement hateful?	1	non-hateful
The following statement was labeled non-hateful by 50% annotators: you have found a handful of outliers who are all as much white as they are black the vast majority of blacks form ghettos and commit most of the crime in the nation they are also a massive tax burden in welfare policing and the prison system . Is the given statement hateful?	0	yes
The following statement was labeled non-hateful by 50% annotators: maugs love letting them white walkers in so easily . Is the given statement hateful?	1	no
The following statement was labeled non-hateful by 50% annotators: swear these niggas some females now . Is the given statement hateful?	1	yes
The following statement was labeled non-hateful by 50% annotators: related instagram tags for jewelry fashionable designer trendy hairstyle fashion gram fashion blog menswear men style trend . Is the given statement hateful?	1	non-hateful
The following statement was labeled non-hateful by 50% annotators: coming with the it named after the river niger and how d that river get that name 🧐 riddle me that nigger . Is the given statement hateful?	0	yes
The following statement was labeled non-hateful by 50% annotators: first pills lean weed rollin niggers . Is the given statement hateful?	1	yes
The following statement was labeled non-hateful by 50% annotators: you son of a bitch i am gonna log onto your twitter and tell everyone what you said . Is the given statement hateful?	1	yes
The following statement was labeled non-hateful by 50% annotators: this is the result of mass immigration of sensitive sjw sand niggers with lots of isis money to use liblaws against racist white people this is a population switch this is the only history kids will be allowed to learn in indoctrination highschool what google and twitter tell them . Is the given statement hateful?	0	yes
The following statement was labeled non-hateful by 50% annotators: i do not like how the faget usa that stole my chileans trillions die in one week planet and inventions trying to kill me uses faget ass police to harass everyone to make they r whole country a murderous asshole faggot your country can go f its face . Is the given statement hateful?	0	yes
The following statement was labeled non-hateful by 50% annotators: <user> <user> rue <number> is the ghetto . Is the given statement hateful?	1	non-hateful
The following statement was labeled non-hateful by 50% annotators: you must be brainwashed because it was the soviets and jews who won ww2 not the british or us . Is the given statement hateful?	1	yes
The following statement was labeled non-hateful by 50% annotators: no white euros are my people i am in favor of christian refugees though muslim refugees can go to saudi arabia as far as i am concerned . Is the given statement hateful?	0	no
The following statement was labeled non-hateful by 50% annotators: there are approx <number> <number> jews there are over <number> <number> muslims and those animals are breeding like rabbits i prioritize targets the jew population is stable and low the sandnigger population is growing like plague which one do you think we should go for first . Is the given statement hateful?	0	yes
The following statement was labeled non-hateful by 50% annotators: what more likely an old white man shoots up a music festival attended by mainly white people because he does not like the music or submissive man radicalized by his domineering moslem wife . Is the given statement hateful?	1	no
The following statement was labeled non-hateful by 50% annotators: <user> give oblivion omega colors because i wasted <number> vbucks on a shit skin . Is the given statement hateful?	1	no
The following statement was labeled non-hateful by 50% annotators: london stan under attack again police suspect it was four old white women upset because they did not have enough recreational centers i would suspect liberalism and jews paying sand niggers but hey i do not have a degree in journalism . Is the given statement hateful?	0	yes
The following statement was labeled non-hateful by 50% annotators: <user> <user> agreed lucie they are not refugees socioeconomic parasites at best islamists and sex attackers at worst . Is the given statement hateful?	0	yes
The following statement was labeled non-hateful by 50% annotators: my best friend constantly whines about how i got the ghetto booty and the white skin and some how she got the white ass and the dark skin we are an amusing pair . Is the given statement hateful?	1	no
The following statement was labeled non-hateful by 50% annotators: so the narrative is kids turn nazi while reading the internet it can not possibly be they got mobbed by a gang of youths while at work they can not possibly have experienced communism first hand they can not have watched their hometown go from <number> white to 3 rd world shithole . Is the given statement hateful?	0	no
The following statement was labeled non-hateful by 50% annotators: microchip has had more nigger cocks in him than a kfc urinal in chicongo on mlk day 😎 . Is the given statement hateful?	0	yes
The following statement was labeled non-hateful by 50% annotators: <user> after jews r elininated na league players are my next target . Is the given statement hateful?	0	yes
The following statement was labeled non-hateful by 50% annotators: are you suggesting that nigger women are somehow unattractive or that they fell out of the ugly tree and hit every branch on the way down datz rayciss but you do have a point there she even uglier than most sheboonz . Is the given statement hateful?	0	yes
The following statement was labeled non-hateful by 50% annotators: fuck this sand nigger . Is the given statement hateful?	0	yes
The following statement was labeled non-hateful by 50% annotators: <user> <user> <number> less boys being raped . Is the given statement hateful?	1	non-hateful
The following statement was labeled non-hateful by 50% annotators: anthony bourdain was a kike that advocated for white genocide good riddance . Is the given statement hateful?	0	yes
The following statement was labeled non-hateful by 50% annotators: suddenly john mccain has a problem with one of his favorite allies recip erdogan when he brutalizes americans so much for mccain all his human rights universal values talk he only has a problem with this islamist humping sand nigger when americans are the victims of his brutality . Is the given statement hateful?	0	yes
The following statement was labeled non-hateful by 50% annotators: holy fuck i swear these white bitches can not fucking drive dawg 🤦 🏻 ‍ ♂️ . Is the given statement hateful?	1	yes
The following statement was labeled non-hateful by 50% annotators: <user> <user> <user> no wonder why muslim countries are not so well developed all they got to do is cry get yourself known whatever you are eating earning drinking leisure is triple the way we are enjoying so ya we do not give f about you . Is the given statement hateful?	1	yes
The following statement was labeled non-hateful by 50% annotators: on god ion like white women niggers move . Is the given statement hateful?	0	yes
The following statement was labeled non-hateful by 50% annotators: fucking kim jongin in a black turtle neck and blue jeans im losing it . Is the given statement hateful?	1	no
The following statement was labeled non-hateful by 50% annotators: actually you are just a retarded faggot . Is the given statement hateful?	0	yes
The following statement was labeled non-hateful by 50% annotators: <user> lmfao if u knew the dykes i knew you d get it 😭 😭 😭 😭 . Is the given statement hateful?	1	no
The following statement was labeled non-hateful by 50% annotators: it ’ kind of islamaphobic that everything is closed today . Is the given statement hateful?	1	yes
The following statement was labeled non-hateful by 50% annotators: berry really need to fix the wifi because this mess is so ghetto . Is the given statement hateful?	1	no
The following statement was labeled non-hateful by 50% annotators: here how we solve the problem of flirting sexual harassment remove women from the workplace and education restore the traditional family done . Is the given statement hateful?	1	yes
The following statement was labeled non-hateful by 50% annotators: you are a muzzie right lolzy . Is the given statement hateful?	0	yes
The following statement was labeled non-hateful by 50% annotators: i wish i was a bad bitch <sad> . Is the given statement hateful?	1	yes
The following statement was labeled non-hateful by 50% annotators: its a bloody good thing that muzzie cunt is gone . Is the given statement hateful?	0	yes
The following statement was labeled non-hateful by 50% annotators: before the crusades for <number> years the barbarian muslimes murdered christians and invaded took nations in europe much as they are doing now that ended with the crusades christians were forced to fight back and they destroyed the muslimes history will repeat we have no choice <user> ‍ . Is the given statement hateful?	0	non-hateful
The following statement was labeled non-hateful by 50% annotators: god will not bless the republican party who bans christians including queers is tolerance banning christians is sin cpac is no longer christian . Is the given statement hateful?	0	non-hateful
The following statement was labeled non-hateful by 50% annotators: <user> bro its cod bruh still wack imagine playin cod on fingers lmao shit is retarded . Is the given statement hateful?	1	yes
The following statement was labeled non-hateful by 50% annotators: i keep reading it as maricon means homosexual in spanish slang . Is the given statement hateful?	1	no
The following statement was labeled non-hateful by 50% annotators: i wish there were more leftists here to argue with conservatives are fun for a while but after a time all you hear is a cacophony of muh based blacks meskins asians queers they are all merican . Is the given statement hateful?	1	non-hateful
The following statement was labeled non-hateful by 50% annotators: <user> calling someone a nigger is probably the douchebag equivalent of a down vote in the real world if you can not handle the downvotes maybe you should not use the word do not be afraid to speak freely when other people will not like it i am like <number> something . Is the given statement hateful?	0	no
The following statement was labeled non-hateful by 50% annotators: <user> they all look amazing . Is the given statement hateful?	1	non-hateful
The following statement was labeled non-hateful by 50% annotators: i am the white man ’ whore . Is the given statement hateful?	0	yes
The following statement was labeled non-hateful by 50% annotators: carhart hats are the basic bitch winter accessory of <number> . Is the given statement hateful?	1	yes
The following statement was labeled non-hateful by 50% annotators: as sun set tzu hu who was little more than twenty two said when you can talk about jews in public with the aplomb of a housecat taking a shit then my son you have achieved mastery of politics dig it that eastern wisdom my weak skinned nigger . Is the given statement hateful?	0	yes
The following statement was labeled non-hateful by 50% annotators: the retarded mongrols on the left have no shame they are so twisted and spiteful they disrupt the candlelight gathering to remember a <number> year old killed by a muslime refugee the sooner we can legally gas these people the better for western society . Is the given statement hateful?	0	hateful
The following statement was labeled non-hateful by 50% annotators: jesus spoke aramaic in a galilean dialect distinguishable from jerusalem while many believe the n.t. was translated from hebrew it was not the n.t. was first translated from aramaic the kike religious belief back then was called pharisaism not judaism . Is the given statement hateful?	0	no
The following statement was labeled non-hateful by 50% annotators: bye bye kike er may you be reincarnated a worm after a long time in hell . Is the given statement hateful?	0	yes
The following statement was labeled non-hateful by 50% annotators: eth · nic cleans · ing ˈethnik klenzing noun the mass expulsion or killing of members of an unwanted ethnic or religious group in a society i think you are the retarded one fake victim table go 👉 🏻 . Is the given statement hateful?	1	no
The following statement was labeled non-hateful by 50% annotators: <user> ain ’ t nothing ghetto about it who told y ’ all white folks only own guns to hunt y ’ all love giving them civilized credit . Is the given statement hateful?	1	no
The following statement was labeled non-hateful by 50% annotators: <user> <user> yes i am not surprised i do not know if you remember but the hatred for the sri lankan refugee tamizh hindus was phenomenal in the 1 9 8 0 . Is the given statement hateful?	1	non-hateful
The following statement was labeled non-hateful by 50% annotators: <user> wonder if her housekeeper is an illegal immigrant . Is the given statement hateful?	1	non-hateful
The following statement was labeled non-hateful by 50% annotators: i am not attacking these people just their bizarre kike critical theory agenda against my country ultimately the nationalist position is so clearly superior that it will win out no matter what so there is no need to argue i am just shocked people actually believe this it weird . Is the given statement hateful?	0	non-hateful
The following statement was labeled non-hateful by 50% annotators: murdered by illegal immigrant . Is the given statement hateful?	1	yes
The following statement was labeled non-hateful by 50% annotators: no dont kill yourself you are so spooky ahah . Is the given statement hateful?	1	no
The following statement was labeled non-hateful by 50% annotators: apocalipse a as gays trombetasdovale . Is the given statement hateful?	1	no
The following statement was labeled non-hateful by 50% annotators: if you are a white lady who ready to call me a nigger but in a loving way hit me up ❤️ . Is the given statement hateful?	1	yes
The following statement was labeled non-hateful by 50% annotators: lol <number> for a desk and <number> for shipping please fuck off i hate you . Is the given statement hateful?	1	yes
The following statement was labeled non-hateful by 50% annotators: mickey mouse is a faggot . Is the given statement hateful?	0	yes
The following statement was labeled non-hateful by 50% annotators: that fucked up she should have suicided bombed the migrant ghetto abode instead . Is the given statement hateful?	0	yes
The following statement was labeled non-hateful by 50% annotators: <user> <user> <user> you keep living in that little bubble and keep pretending that reality is what you say it is the only immigrants i know that are totalitarians or fascist are hooligans neo nazis white supremacy believers and all those ideologies involved white supremacy . Is the given statement hateful?	1	non-hateful
The following statement was labeled non-hateful by 50% annotators: i have absolutely nothing against patrick little but his personal opinion on mudslimes matters not in the least to me . Is the given statement hateful?	0	yes
The following statement was labeled non-hateful by 50% annotators: i wanna go back to miami and be niggerish . Is the given statement hateful?	0	yes
The following statement was labeled non-hateful by 50% annotators: white women cannot compete thicc asians are truly the greatest threat to the white race i am just spreading awareness of this menace . Is the given statement hateful?	1	yes
The following statement was labeled non-hateful by 50% annotators: nah i just posted an ugly kikess from anonymous nudes that she was sending to minors on twitter after she claimed she was gonna dox me and purposely endanger any children i may have and she dared me to do it got the whore fired too turnabout is fair play . Is the given statement hateful?	0	yes
The following statement was labeled non-hateful by 50% annotators: <user> <user> ching chong ching . Is the given statement hateful?	1	non-hateful
The following statement was labeled non-hateful by 50% annotators: esteban santiago is a beaner muslim build the wall ban muslim immigration trump was right again hail trump . Is the given statement hateful?	0	hateful
The following statement was labeled non-hateful by 50% annotators: this what happens when little adam is way smarter than his fat dyke lib teacher . Is the given statement hateful?	0	yes
The following statement was labeled non-hateful by 50% annotators: theresa may wants to remain in the eu attacking russia attacking america by arresting brittany two huge deals could now be in jeopardy i hope the russians or the arabs get may . Is the given statement hateful?	1	yes
The following statement was labeled non-hateful by 50% annotators: chosen iq gab crashed and sent my reply unfinished embarrassing point is this guy is a dirty nigger . Is the given statement hateful?	0	yes
The following statement was labeled non-hateful by 50% annotators: aural werewolves of hapiness a traditional black metal band . Is the given statement hateful?	1	non-hateful
The following statement was labeled non-hateful by 50% annotators: did not a nigger just shoot up a white church just wondering because i have not seen any politicians or media people screaming for any all to disavow black supremacy . Is the given statement hateful?	1	yes
The following statement was labeled non-hateful by 50% annotators: <user> she was screaming nigger and that she wish she could kill all the niggers in public at a cvs bitch . Is the given statement hateful?	0	yes
The following statement was labeled non-hateful by 50% annotators: <user> it is a muslim ummah issue what you scared of loss of money . Is the given statement hateful?	1	non-hateful
The following statement was labeled non-hateful by 50% annotators: <user> with the news of dykes going down do you expect kam wilson to step in to fill the dykes role . Is the given statement hateful?	1	non-hateful
The following statement was labeled non-hateful by 50% annotators: as long as its niggers killing nigger i could care less let these nigger animals kill themselves off . Is the given statement hateful?	0	yes
The following statement was labeled non-hateful by 50% annotators: that area of philly is huge ghetto the niggers ruined the best neighborhoods in philly on purpose no such thing as an upscale nigger neighborhood and never will be . Is the given statement hateful?	0	yes
The following statement was labeled non-hateful by 50% annotators: what worse than a subaru full of niglets driven by two dykes there was an empty seat . Is the given statement hateful?	0	yes
The following statement was labeled non-hateful by 50% annotators: they letting this nigga kuzma do what he want . Is the given statement hateful?	1	yes
The following statement was labeled non-hateful by 50% annotators: i ask jim how to steal a pop socket from target and he told me to get a scooter and act retarded . Is the given statement hateful?	0	yes
The following statement was labeled non-hateful by 50% annotators: and it also still gets downplayed that said lying came about because of a sexual harassment lawsuit against clinton . Is the given statement hateful?	1	non-hateful
The following statement was labeled non-hateful by 50% annotators: all white boys do is lie and punch walls . Is the given statement hateful?	1	yes
The following statement was labeled non-hateful by 50% annotators: psa lgbt does not mean gay and lesbian the other two letters stand for things too 🤦 🏻 ‍ ♀️ . Is the given statement hateful?	1	non-hateful
The following statement was labeled non-hateful by 50% annotators: all these nazis b on my d yo i gotta b in reality suck a d if you doubted me . Is the given statement hateful?	1	no
The following statement was labeled non-hateful by 50% annotators: islamaphobia is absolutely ugly and i truly stand w the muslims esp hijabi women who deal with it on a day to day basis . Is the given statement hateful?	1	non-hateful
The following statement was labeled non-hateful by 50% annotators: <user> kool fuck you too then 😑 . Is the given statement hateful?	1	yes
The following statement was labeled non-hateful by 50% annotators: bust that ugly nigga eye out . Is the given statement hateful?	1	yes
The following statement was labeled non-hateful by 50% annotators: this is what happens when you do not put the toilet seat down for your immigrant roommate d . Is the given statement hateful?	1	non-hateful
The following statement was labeled non-hateful by 50% annotators: <user> i fucking hate you ziad . Is the given statement hateful?	1	yes
The following statement was labeled non-hateful by 50% annotators: smashing sand nigger is easy destroying commie filth is even easier . Is the given statement hateful?	0	yes
The following statement was labeled non-hateful by 50% annotators: it ain t about black or white cause we are all humans . Is the given statement hateful?	1	non-hateful
The following statement was labeled non-hateful by 50% annotators: why did she have to kill all the marauders why . Is the given statement hateful?	1	no
The following statement was labeled non-hateful by 50% annotators: you did genius when you made this comment just remember when the paki rapes your child it has nothing to do with racism do you believe pakistani immigrants who rape are not muslims hindu tend to refrain from this type of behavior . Is the given statement hateful?	0	yes
The following statement was labeled non-hateful by 50% annotators: caelynn just became a hero to so many women and colton needs to become a role model to men the bachelor . Is the given statement hateful?	1	non-hateful
The following statement was labeled non-hateful by 50% annotators: i remember another time the fucktards got their panties in a twist about a white baby pic . Is the given statement hateful?	0	yes
The following statement was labeled non-hateful by 50% annotators: in <number> kenyans only wore skins covering their private parts young people walked naked but there were no cases of sexual harassment what happening to africa gender forum . Is the given statement hateful?	1	non-hateful
The following statement was labeled non-hateful by 50% annotators: people are still retarded i see . Is the given statement hateful?	1	yes
The following statement was labeled non-hateful by 50% annotators: they have killed no one <number> of the deaths were atomwaffen themselves <number> were associates not even members if you are going to be a nigger at least read the story . Is the given statement hateful?	0	yes
The following statement was labeled non-hateful by 50% annotators: <user> gobble propaganda where were you when hindu women were raped your friends . Is the given statement hateful?	1	non-hateful
The following statement was labeled non-hateful by 50% annotators: <user> <user> i am not accusing anyone of anything but when some things are said you know it embedded in racism ok so she is accusing people of racism btw as all americans consider themselves immigrants this phrase is not racist and it been used at me a white guy . Is the given statement hateful?	1	non-hateful
The following statement was labeled non-hateful by 50% annotators: crop this you fucking faggot . Is the given statement hateful?	0	yes
The following statement was labeled non-hateful by 50% annotators: <user> hekdhskhssk they all look like they are in <number> different music videos it horrifying . Is the given statement hateful?	1	non-hateful
The following statement was labeled non-hateful by 50% annotators: <user> <user> <user> <user> aragorn was an incompetent king and arwen actually ruled gondor sherlock holmes did not solve any crimes it was actually mrs carmichael the whole time hitler did not kill all those jews eva braun masterminded the whole thing . Is the given statement hateful?	1	non-hateful
The following statement was labeled non-hateful by 50% annotators: fox news bill o reilly given <number> million contract just weeks after sexual harassment payout telegraph hotpagenews com r <number> . Is the given statement hateful?	1	non-hateful
The following statement was labeled non-hateful by 50% annotators: liberal logic illegal alien kills kate steinle conservatives upset over acquittal ergo conservatives hate immigrants conservative logic illegal alien kills kate steinle knows there is a difference between legal illegal immigrants ergo liberals are shameless liars . Is the given statement hateful?	1	no
The following statement was labeled non-hateful by 50% annotators: next weeks stephan molyneux shows will be titled coons are they even the same species and the truth about drowning picaninies in a bucket . Is the given statement hateful?	0	no
The following statement was labeled non-hateful by 50% annotators: will all of the white people who want to move to a ghetto or third world country please raise your hand . Is the given statement hateful?	1	non-hateful
The following statement was labeled non-hateful by 50% annotators: better than nigger art look at that jaguar . Is the given statement hateful?	0	yes
The following statement was labeled non-hateful by 50% annotators: i always hate waking kike up before i have to go to work 😩 😩 😂 . Is the given statement hateful?	0	non-hateful
The following statement was labeled non-hateful by 50% annotators: is our president mentally retarded . Is the given statement hateful?	1	yes
The following statement was labeled non-hateful by 50% annotators: man somebody is getting nasty i listened to a clip on twitter of that muzzie zaweed on cnn have a meltdown and it attacked my machine made it emitting screeching buzz and freeze i had to shut it off . Is the given statement hateful?	0	no
The following statement was labeled non-hateful by 50% annotators: firstly i never studied the bible too closely secondly i always hear people refer to jesus as a jewish carpenter thirdly and lastly kike jew if my anti semitism to english dictionary is up to date . Is the given statement hateful?	0	no
The following statement was labeled non-hateful by 50% annotators: <user> therapy anime gay . Is the given statement hateful?	1	non-hateful
The following statement was labeled non-hateful by 50% annotators: <user> <user> libreal fb banned me for <number> days or a comment against that raghead congress terrorist illan omar i called her a terrorist and a diaperheaded hater of the usa i was banned from <date> <number> no freedom of speech on zuckermans fb unless you are a dumbocrat . Is the given statement hateful?	0	yes
The following statement was labeled non-hateful by 50% annotators: follow me <user> retweet drop your handles follow whoever likes it this let all gain . Is the given statement hateful?	1	non-hateful
The following statement was labeled non-hateful by 50% annotators: <user> yep tho is anyone surprised their defending known nazi nick fuentes . Is the given statement hateful?	1	non-hateful
The following statement was labeled non-hateful by 50% annotators: spixico south america nigfrica are older than america and most other white countries and centuries behind them all they are all totally inferior and incapable of keeping up with the higher standards of that of whites asians niggers spics have no place in a white mans world period . Is the given statement hateful?	0	yes
The following statement was labeled non-hateful by 50% annotators: <user> im not lol im categorizing middle school white kids and asians as horrible fighters . Is the given statement hateful?	1	no
The following statement was labeled non-hateful by 50% annotators: so this action by espn of dropping the sportscaster because of his name robert lee glaringly points out the reality of the left and how they are now the equal of the nazi brown shirts espn and others simply expect the violence that the dems gleefully promote and commit . Is the given statement hateful?	1	non-hateful
The following statement was labeled non-hateful by 50% annotators: it ’ funny how these same people complain about immigrants taking over schools and jobs . Is the given statement hateful?	1	non-hateful
The following statement was labeled non-hateful by 50% annotators: lookit dat fucken kike tryna wreck mah rep on heah . Is the given statement hateful?	0	yes
The following statement was labeled non-hateful by 50% annotators: refugees welcome to walk the plank and get eaten by sharks oh poor factory where you getting cheap labour from oh poor hotel cramming <number> to a room yes ask a postman where they live as well . Is the given statement hateful?	0	yes
The following statement was labeled non-hateful by 50% annotators: i have had this idea for a while now a dystopian sci fi future where whites are a small minority a girl from the ghetto named cinnamon smith leads a movement to rise up and set things right . Is the given statement hateful?	1	non-hateful
The following statement was labeled non-hateful by 50% annotators: <user> simple women within the muslim brotherhood have been infiltrating the womens rights and feminist movements they seek to take the place of dykes as the natural leaders of these movements in order to convert feminists into muslims . Is the given statement hateful?	0	no
The following statement was labeled non-hateful by 50% annotators: the mentally ill snow nigger is you gabbing at me everyday to get a taste of my curry cock and then pretend like you do not enjoy it it like every racist nazi homophobe that has been caught getting fuxked by a black homo . Is the given statement hateful?	0	yes
The following statement was labeled non-hateful by 50% annotators: <user> had to refollow you you goddamn jew nigger faggot cunt maple syrup drinking muzzie or fantastic gentleman take your pick . Is the given statement hateful?	0	yes
The following statement was labeled non-hateful by 50% annotators: have i said anything to bash the chinks lately 🤔 seems like a week since i really cussed out a chink or made a mean meme about chinks ive been so busy bashing those greasy illegal alien spics that those sneaky chinks somehow avoided my attention like little sneaky faggit ninjas 😡 🖕 🇯 🇵 . Is the given statement hateful?	0	yes
The following statement was labeled non-hateful by 50% annotators: well if you see something on bitchute saying kill all white people please let us know and we will treat that the same . Is the given statement hateful?	1	no
The following statement was labeled non-hateful by 50% annotators: <user> <user> turkey is a jihadist terrorist organization and doesn ’ t belong to any western organization . Is the given statement hateful?	0	no
The following statement was labeled non-hateful by 50% annotators: lol nice try kike trying to convince me to dox myself because you called me a name tell ur kike line manager to try harder next time ur freudian bs no longer works on us goyim the goyim know . Is the given statement hateful?	0	yes
The following statement was labeled non-hateful by 50% annotators: people really have the audacity to think i am not funny bitch i am hilarious . Is the given statement hateful?	1	yes
The following statement was labeled non-hateful by 50% annotators: its about time blacks realised the <number> women who started blm were jew women jews will use you all destroy your families to keep jews on top . Is the given statement hateful?	0	hateful
The following statement was labeled non-hateful by 50% annotators: i hate slow retarded inconsiderate mfs just die g . Is the given statement hateful?	0	yes
The following statement was labeled non-hateful by 50% annotators: <user> <user> <user> nah boys nah im out niggers . Is the given statement hateful?	0	yes
The following statement was labeled non-hateful by 50% annotators: if youve been banned from twitter it means jews have sent you a notification that you no longer have rights in the new world order and you are now oficially a target that must be eliminated . Is the given statement hateful?	0	yes
The following statement was labeled non-hateful by 50% annotators: palestine is real it part of syria palestia the name the romans gave it after they struck down a jewish insurrection in the first century ad it was originally called judea but it sure as shit ain t no raghead country or even a country at all . Is the given statement hateful?	1	yes
The following statement was labeled non-hateful by 50% annotators: gay moslem support group . Is the given statement hateful?	1	non-hateful
The following statement was labeled non-hateful by 50% annotators: do not they cut hands or fingers off for theft in sand nigger land we should do that here since they are stealing our country . Is the given statement hateful?	0	yes
The following statement was labeled non-hateful by 50% annotators: the dam vile jews want a greater israel which includes all of the middle east they will ship all the towel heads to europe and usa we need to blow up israel . Is the given statement hateful?	0	yes
The following statement was labeled non-hateful by 50% annotators: so riddle me this if washington state has standing to fight the trump travel ban for economic hardship and lost tax revenue from immigrants taxes why did not az and tx have standing to fight illegal immigration for lost tax revenue and added costs caused by illegal immigrants w their laws . Is the given statement hateful?	1	non-hateful
The following statement was labeled non-hateful by 50% annotators: rotherham and childrens services says paki muslims raping white girls is not a racial issue childrens services are cunts and need hanging pieces of shit . Is the given statement hateful?	0	yes
The following statement was labeled non-hateful by 50% annotators: take our values and shove them up your hairy shitty ass sand nigger scum . Is the given statement hateful?	0	yes
The following statement was labeled non-hateful by 50% annotators: today two terrorist attacks with machete in buckinham palace and bruselles but in america the free media doesn ´ t say a thing but trump nazi hate speech white supremacist and even call the terrorism just a copycat of charlottesville violence that ´ why we need new medias and free speech . Is the given statement hateful?	1	non-hateful
The following statement was labeled non-hateful by 50% annotators: a note for turkeys fm muslims stay the fuck in your own countries and you will not have to worry about holocaust or islamsphobia only where your next meal is coming from when our foreign aid stops mischief making motherfuckers . Is the given statement hateful?	0	yes
The following statement was labeled non-hateful by 50% annotators: if you insist on being a white person at least have the decency to be a communist . Is the given statement hateful?	1	non-hateful
The following statement was labeled non-hateful by 50% annotators: actually i prefer my jews going up the chimney . Is the given statement hateful?	0	yes
The following statement was labeled non-hateful by 50% annotators: dawson smith with a triple and a taylorville timeout shoes lead <number> <number> with <time> left . Is the given statement hateful?	1	non-hateful
The following statement was labeled non-hateful by 50% annotators: looks homey niggers like to call us cavebeasts we were smart enough to get out of the rain keep a fire going to put our backs to walls and store stuff as opposed to capering tree to tree eating rotten fruit like feckless nigger monkeys storing surplus gave rise to agriculture . Is the given statement hateful?	1	yes
The following statement was labeled non-hateful by 50% annotators: and the kike reveals himself lol . Is the given statement hateful?	0	no
The following statement was labeled non-hateful by 50% annotators: ricky vaugh sounds like a dumb filipino gook why the fuck was he on the crypto report . Is the given statement hateful?	0	yes
The following statement was labeled non-hateful by 50% annotators: police involvement they raped children to no wonder pak muslims protection was so thoroughly covered up . Is the given statement hateful?	0	no
The following statement was labeled non-hateful by 50% annotators: <user> this is a dream come true finally women are getting respect in wwe . Is the given statement hateful?	1	non-hateful
The following statement was labeled non-hateful by 50% annotators: what does this nigger know about growing up irish catholic in boston niggers and kikes pretend we whites bully and oppress our women nothing could be further from the truth this is wholesale racist discrimination and defamation and we are going to put a stop to it . Is the given statement hateful?	0	yes
The following statement was labeled non-hateful by 50% annotators: do u guys think the make a wish foundation would grant me my wish to call kim kardashians baby a nigger right to it face before i die ✝️ 😇 ✝️ 😇 . Is the given statement hateful?	0	yes
The following statement was labeled non-hateful by 50% annotators: the dyke wants her kpop boy . Is the given statement hateful?	1	yes
The following statement was labeled non-hateful by 50% annotators: <user> i ’ m deeply concerned that a us representative has an issue with deporting illegal immigrants . Is the given statement hateful?	1	non-hateful
The following statement was labeled non-hateful by 50% annotators: white chocolate covered strawberries edible arrangement me please . Is the given statement hateful?	1	non-hateful
The following statement was labeled non-hateful by 50% annotators: you democrats should be expected to denounce leftist violence illegal immigrant violence and islamic violence until that happens give us all a break from your outrageously fake moral purity . Is the given statement hateful?	1	non-hateful
The following statement was labeled non-hateful by 50% annotators: advocacy manager advocacy manager the norwegian refugee council nrc is a non governmental humanitarian organization with <number> years of experience in helping to create a safer and more dignified life for refugees and internally displaced people nrc advocates for the rights … . Is the given statement hateful?	1	non-hateful
The following statement was labeled non-hateful by 50% annotators: me mm i have to like pee mom bitch you always have to pee when we go somewhere me wtf you so loud for 🤣 . Is the given statement hateful?	1	yes
The following statement was labeled non-hateful by 50% annotators: i pinches fucking hate walter white . Is the given statement hateful?	1	yes
The following statement was labeled non-hateful by 50% annotators: can not wait to see the raghead after a heart attack with his newly found free healthcare turn down a pig heart valve to stay alive would not be surprised if we have halal certified chicken valves for them instead . Is the given statement hateful?	0	yes
The following statement was labeled non-hateful by 50% annotators: do not appropriate words you have no fucking clue on nazi aryan is not the retarded definition that you white supremacist cunts continue to believe . Is the given statement hateful?	0	yes
The following statement was labeled non-hateful by 50% annotators: fuck yeah kill that white devil the terror infamy . Is the given statement hateful?	0	yes
The following statement was labeled non-hateful by 50% annotators: <number> gay the rules of mathematics can not contain me . Is the given statement hateful?	1	no
The following statement was labeled non-hateful by 50% annotators: so either the knock out game is being played on my campus or else local negroes are actually hard up enough to jump out of a car punch a white guy in the eye and steal a mcdonald bag from him before driving off . Is the given statement hateful?	0	no
The following statement was labeled non-hateful by 50% annotators: the nigger has a conception of his heroic ideal it reaches nowhere near white heights whites are utterly alien and incomprehensible to him the typical nigger reactions of amusement contempt and hatred for whites thus follow wimpy whites meanwhile admire the macho confidence of a chimp race . Is the given statement hateful?	0	yes
The following statement was labeled non-hateful by 50% annotators: <user> <user> <user> <user> <user> i did not even hear that like she reaching cause she wants to look like a woke white person and all the people who liked her reply are stupid 💀 . Is the given statement hateful?	1	yes
The following statement was labeled non-hateful by 50% annotators: i did want to go to sleep eventually but the neighbors wanna blast ghetto music at five in the morning i hate niggers . Is the given statement hateful?	0	yes
The following statement was labeled non-hateful by 50% annotators: london is open to acid throwing immigrant scum . Is the given statement hateful?	0	yes
The following statement was labeled non-hateful by 50% annotators: <user> common for trump groupies rt <user> nigger sand nigger all the same oh yea wetbacks too . Is the given statement hateful?	0	yes
The following statement was labeled non-hateful by 50% annotators: kanye just be minding his own business an you all niggers go out of you all way to slander an hate . Is the given statement hateful?	1	yes
The following statement was labeled non-hateful by 50% annotators: typical kyke nigger your breed of autism is cancer chemo the stupid . Is the given statement hateful?	0	yes
The following statement was labeled non-hateful by 50% annotators: lol tariq deserved that whooping that bitch nigger . Is the given statement hateful?	0	yes
The following statement was labeled non-hateful by 50% annotators: <user> <user> <user> <user> meh call it what you will women still need to be protected from homosexuals usurping their traditional spaces . Is the given statement hateful?	1	non-hateful
The following statement was labeled non-hateful by 50% annotators: well what other way does a corrupt dyke make sure that her pervvy pedo mates do not spend the rest of their sorry lives picking up soap . Is the given statement hateful?	0	yes
The following statement was labeled non-hateful by 50% annotators: easy fix exterminate <number> 3 billion niggers spics and sand niggers along with a few million libtardassians . Is the given statement hateful?	0	yes
The following statement was labeled non-hateful by 50% annotators: <user> if he had been white this would not have been an issue but the blacks make it racist . Is the given statement hateful?	0	hateful
The following statement was labeled non-hateful by 50% annotators: 4 th of july always fires up my american patriot blood demanding and fighting for freedom for all dems openly want mussie barbarian sharia in america that makes women all but slaves not going to happen vote dems out of congress <date> <user> make america great . Is the given statement hateful?	0	yes
The following statement was labeled non-hateful by 50% annotators: imagine being a lying kike shill like <user> . Is the given statement hateful?	0	yes
The following statement was labeled non-hateful by 50% annotators: i would love to shoot a nigger in the head while jabbing an ice pick into a kikes eyesocket . Is the given statement hateful?	0	yes
The following statement was labeled non-hateful by 50% annotators: <user> why do they all look the same . Is the given statement hateful?	1	non-hateful
The following statement was labeled non-hateful by 50% annotators: any last words before you join your fellow kike trolls on my mutes list go ahead rube now your chance make it count post something really smart mouth this time . Is the given statement hateful?	0	yes
The following statement was labeled non-hateful by 50% annotators: africans have murdered more than <number> white farmers but the blacks are too lazy stupid with an iq of <number> mildly retarded obese nigger are just niggers that are inactive lazy useless pigs . Is the given statement hateful?	0	yes
The following statement was labeled non-hateful by 50% annotators: you are absolutely right we failed we should have eradicated every single shitskin subhuman in north america instead we tried to be nice look what that got us we will not be nice this time around faggot . Is the given statement hateful?	0	yes
The following statement was labeled non-hateful by 50% annotators: <number> <number> being anti sjw far left feminazi is not the same as being a anti lbbt or sexist ellie being lgbt bothers insecure homophobes sexists or platform shill slaves downplaying the game hint look at the ppl who called kait a badass in gears5 but have a problem with ellie . Is the given statement hateful?	1	non-hateful
The following statement was labeled non-hateful by 50% annotators: <user> obama wasn t black he was a mulatto he had a white mother if anything this was a case of racism against caucasians mother thrown to the side barry treated like the lion king what was up with that moral compass jimmy swaggart special edition compass 😂 😂 😂 . Is the given statement hateful?	1	non-hateful
The following statement was labeled non-hateful by 50% annotators: who let the moslems in they did not let themselves in who was behind the immigration act that opened up your country to all sorts of third world scum ignorant burger boomer a bunch of jews like jacob javitz and emmanuel cellar . Is the given statement hateful?	0	yes
The following statement was labeled non-hateful by 50% annotators: r they actually retarded . Is the given statement hateful?	1	yes
The following statement was labeled non-hateful by 50% annotators: <user> ah so we should just ignore nazis marching in the street . Is the given statement hateful?	1	non-hateful
The following statement was labeled non-hateful by 50% annotators: <user> <user> shes not blonde or attractive so she has no shot wwe view of women is disgusting . Is the given statement hateful?	1	yes
The following statement was labeled non-hateful by 50% annotators: yeah it is pretty entertaining having them online they say some fucking retarded shit e g wewuzkangz i think that why i only suggested that they be prevented from making purchases maybe we can just require a minimum iq that should do the trick . Is the given statement hateful?	0	yes
The following statement was labeled non-hateful by 50% annotators: but the jews did not believe concerning him that he had been blind and received his sight until they called the parents of him that had received his sight john <time> faith bible god . Is the given statement hateful?	1	non-hateful
The following statement was labeled non-hateful by 50% annotators: thought she was a pretty rickey bitch but she like yo gotti . Is the given statement hateful?	1	yes
The following statement was labeled non-hateful by 50% annotators: <user> <user> it true im fucking this pawg nurse and in bed we laugh about how they kill all the black corona patients . Is the given statement hateful?	0	yes
The following statement was labeled non-hateful by 50% annotators: not sure why queers like communism i guess the think that all things will become public common property turkish baths for all forever . Is the given statement hateful?	1	no
The following statement was labeled non-hateful by 50% annotators: fuck machinehead and pussies like them bringing feminist queers into metal fake trash poisoning the well . Is the given statement hateful?	0	yes
The following statement was labeled non-hateful by 50% annotators: why does using google maps to walk 5 mins have to be the worst most ghetto experience ever . Is the given statement hateful?	1	no
The following statement was labeled non-hateful by 50% annotators: that guy was constantly posting thankyoualtright snarky bullshit as statues were being taken down after charlottesville that from a guy who i am sure has never done shit but post on the internet now he white knights lame faggotry . Is the given statement hateful?	0	yes
The following statement was labeled non-hateful by 50% annotators: bunch of faggots you can not use this opportunity to beat them black and blue dead team 😡 😡 . Is the given statement hateful?	1	yes
The following statement was labeled non-hateful by 50% annotators: the patriotards who castigate us for saying the kikes need to be exterminated are too stupid to live in the real world when savage enemies are slaughtering your people only pathetic faggots wring their hands over the evil of killing them . Is the given statement hateful?	0	yes
The following statement was labeled non-hateful by 50% annotators: remember when black indigenous folks use to say this in america i am not a nigger but a negro when i become a nigger i will let you know as a form of racial pride smfh at all the erroneous synonyms for owner of the lands http :// content time com time nation article <number> <number> html . Is the given statement hateful?	0	no
The following statement was labeled non-hateful by 50% annotators: so called churches are more interested in collecting $$ for harboring illeg aliens and importing mudslime to rape and murder us . Is the given statement hateful?	0	yes
The following statement was labeled non-hateful by 50% annotators: too few coppers why are people such faggots carry a pistola or at least a knife the commie uk is an awful gov they have repeatedly betrayed their people the farty queen breaks wind as she gave the country away to the muzzrats commie united kingdomistan cuk aloha akbar . Is the given statement hateful?	0	yes
The following statement was labeled non-hateful by 50% annotators: my mama told me it wrong to hate people so i just want you all to know i do not hate jews niggers faggots dykes fat bitch feminest cucks ragheads or illegals but i really really really fucking dislike them they should all die of ghoneria and rot in hell . Is the given statement hateful?	0	yes
The following statement was labeled non-hateful by 50% annotators: sebastian kurz the chancellor of austria stated yesterday that he plans to use the country <number> month rotating presidency of the eu to prevent waves of immigrants from landing on european shores he said that the plan of resettling asylum seekers to all eu countries will not work . Is the given statement hateful?	1	non-hateful
The following statement was labeled non-hateful by 50% annotators: worthless mudshark gets <money> p yr in benefits but buys horse to help her depression i d be depressed too if i had <number> half nigger kids see bottom right pic father conspicuously absent in photo she needs a tubal ligation not a horse . Is the given statement hateful?	0	yes
The following statement was labeled non-hateful by 50% annotators: there is no such thing as trans it is called queer or freak . Is the given statement hateful?	0	yes
The following statement was labeled non-hateful by 50% annotators: the town where i live is still <number> white thank god more spics and niggers by the year though no darkies working at wendies though . Is the given statement hateful?	0	yes
The following statement was labeled non-hateful by 50% annotators: gas the kikes and muzzies with tide pods at least they will be clean enough to show up at church . Is the given statement hateful?	0	yes
The following statement was labeled non-hateful by 50% annotators: gangsta poppin margiela can not hustlin this nigger . Is the given statement hateful?	1	yes
The following statement was labeled non-hateful by 50% annotators: and the kike reveals himself in a couple of posts lol go fuck yourself shlomo . Is the given statement hateful?	0	yes
The following statement was labeled non-hateful by 50% annotators: <user> at least you are white so it not super odd i am <percent> hawaiian nazi fascist white supremacist climate hater sexist incel homo trans furryphobe maga bot lmao labels are dumb . Is the given statement hateful?	1	yes
The following statement was labeled non-hateful by 50% annotators: niggas been debating quilly and meek since <number> lol . Is the given statement hateful?	1	yes
The following statement was labeled non-hateful by 50% annotators: <user> <user> <user> i call anyone a nazi who is a racist white nationalist it not that abstract . Is the given statement hateful?	1	non-hateful
The following statement was labeled non-hateful by 50% annotators: there you go he right <percent> muzzie population and you are done did someone call cair established flourishing in all <number> states with full knowledge of every policing agency . Is the given statement hateful?	0	yes
The following statement was labeled non-hateful by 50% annotators: whites are the victims as always blacks are the aggressors look back to slavery blacks started slavery continue to take slaves today <number> <number> people are held in slavery by black moslem garbage . Is the given statement hateful?	0	hateful
The following statement was labeled non-hateful by 50% annotators: mean iq beaner <number> . Is the given statement hateful?	0	no
The following statement was labeled non-hateful by 50% annotators: <user> democrats don ’ t understand that no matter if ur black white whatever . Is the given statement hateful?	1	non-hateful
The following statement was labeled non-hateful by 50% annotators: lol i like it name the sportball jigaboo that was busted at an airport with a wizinator . Is the given statement hateful?	0	no
The following statement was labeled non-hateful by 50% annotators: another muzrat attack . Is the given statement hateful?	0	no
The following statement was labeled non-hateful by 50% annotators: <user> <user> <user> <user> you must be fool some handful of ullas does not represent kashmir it belongs to <number> lac kashmiri pandits aswell who were butchered and raped and forced to exile from their own lands go home kid you need a better tutor . Is the given statement hateful?	1	yes
The following statement was labeled non-hateful by 50% annotators: immigrants founded this country . Is the given statement hateful?	1	non-hateful
The following statement was labeled non-hateful by 50% annotators: <user> ‍ how much nigger cock do you suck per week faggot . Is the given statement hateful?	0	yes
The following statement was labeled non-hateful by 50% annotators: <user> <user> <user> <user> did financial stability save jews from holocaust do you have any idea how much jews during hitlar rein was rich and prosperous . Is the given statement hateful?	1	non-hateful
The following statement was labeled non-hateful by 50% annotators: you have to read the rest christ is not his last name a moslem would never confess him as christ 2 nd best prophet ever . Is the given statement hateful?	1	non-hateful
The following statement was labeled non-hateful by 50% annotators: i honestly believe europe was jealous of our niggers and decided to one up us by importing the only people even more retarded and violent than niggers muslims . Is the given statement hateful?	0	hateful
The following statement was labeled non-hateful by 50% annotators: so who is the biggest dhimmi moslem cock sucker sharia may who thinks sharia is beneficial to the uk or amber rudd y useless who will not ban political wing of moslem terrorists hezbollah but will give brits 1 5 yrs jail for looking at a far right website . Is the given statement hateful?	0	yes
The following statement was labeled non-hateful by 50% annotators: i hate comin to mfkn newark these asians can ’ t fuccin drive for shit . Is the given statement hateful?	1	yes
The following statement was labeled non-hateful by 50% annotators: <user> yeah well i could not listen to this cernolispy kike fag for more than 5 sec . Is the given statement hateful?	0	yes
The following statement was labeled non-hateful by 50% annotators: <user> <user> and stop nazis winning . Is the given statement hateful?	1	non-hateful
The following statement was labeled non-hateful by 50% annotators: <user> i just seen u say u want a neck tat but a portrait ghetto alright young m a . Is the given statement hateful?	1	no
The following statement was labeled non-hateful by 50% annotators: a muslime women forced to wear her panties on her head says american woman have no freedom lol . Is the given statement hateful?	1	no
The following statement was labeled non-hateful by 50% annotators: <user> men commission i d be surprised if <user> even knows that men boys are raped and assaulted in india he seems to talk about nothing but beti <number> <number> beta can go f**k <censored> themselves according to bjp . Is the given statement hateful?	1	yes
The following statement was labeled non-hateful by 50% annotators: i do not know how to leave eastern canada im sick of the muslimes here . Is the given statement hateful?	0	hateful
The following statement was labeled non-hateful by 50% annotators: in new york city a new law is coming that would outlaw the use of the term illegal alien do you think it is consistent with our constitutional right to free speech for any words or phrases to be criminalized . Is the given statement hateful?	1	non-hateful
The following statement was labeled non-hateful by 50% annotators: aubrey life is a highway swanson life is a bitch day one . Is the given statement hateful?	1	yes
The following statement was labeled non-hateful by 50% annotators: <user> <user> this is why stoji remains the superior white girl . Is the given statement hateful?	1	non-hateful
The following statement was labeled non-hateful by 50% annotators: retarded x <number> asshole x <number> justin trudeau retarded asshole . Is the given statement hateful?	0	yes
The following statement was labeled non-hateful by 50% annotators: omg i always feel so disgusting when a girl thinks i am trying to hit on her 😭 ma am i am a ✨ faggot ✨ . Is the given statement hateful?	1	yes
The following statement was labeled non-hateful by 50% annotators: why are these white women being picked on 🙄 . Is the given statement hateful?	1	non-hateful
The following statement was labeled non-hateful by 50% annotators: pitbulls are not violent because violence is violence plus privilege plus power pitbulls can not vote marry or open a bank account in any state in the uska whatever they do is just chickens coming home to roost pitbullsocialjusticeapologetics . Is the given statement hateful?	1	non-hateful
The following statement was labeled non-hateful by 50% annotators: <user> lol keyboard warrior what happened you actually decided to read the kirk propaganda and felt armed throwing a homophobic slur at me is no insult only insecure closet gays like you think queer an insult 🤡 🤡 🤡 . Is the given statement hateful?	1	non-hateful
The following statement was labeled non-hateful by 50% annotators: i will not be watching the superbowl let alone lady spiritcooking gaga halftime show the sportsball industry has turned into an sjw hatefest against the white working and middle classes that made them rich . Is the given statement hateful?	1	yes
The following statement was labeled non-hateful by 50% annotators: if trump needs a man to run operation wetback again i am available . Is the given statement hateful?	1	non-hateful
The following statement was labeled non-hateful by 50% annotators: <user> sounds a bit harsh you did not say anything non-hateful by any chance then again me dressed in a wig and calling the real me a faggot is now hate speech i am livid . Is the given statement hateful?	1	yes
The following statement was labeled non-hateful by 50% annotators: <user> <user> <user> god bless you lady god loves you hope someday you make a positive act on someone who needs it like the illegal aliens . Is the given statement hateful?	1	no
The following statement was labeled non-hateful by 50% annotators: sacrifices must be made i agree screw that newport smoking fatass mudshark and her ugly mama too . Is the given statement hateful?	0	yes
The following statement was labeled non-hateful by 50% annotators: <number> draft order <number> tigers <number> orioles <number> marlins <number> royals <number> blue jays <number> mariners <number> pirates <number> padres <number> rockies <number> angels <number> white sox <number> reds <number> giants <number> rangers <number> phillies <number> cubs <number> red sox <number> diamondbacks <numb…	1	no
The following statement was labeled non-hateful by 50% annotators: <user> you prolly right after all they did bring disease to america columbus ass which killed all the native americans . Is the given statement hateful?	1	yes
The following statement was labeled non-hateful by 50% annotators: omg i hope she gets charged for felony vandalism for leaving a dead nigger in that hotel room 😳 . Is the given statement hateful?	0	yes
The following statement was labeled non-hateful by 50% annotators: cock slut what the hell is this . Is the given statement hateful?	1	yes
The following statement was labeled non-hateful by 50% annotators: <user> trump erroneously presented the total number of aliens in the country <number> million as the number of illegal aliens in this country . Is the given statement hateful?	1	non-hateful
The following statement was labeled non-hateful by 50% annotators: lol well they apparently do not like asians as a minority i guess . Is the given statement hateful?	1	no
The following statement was labeled non-hateful by 50% annotators: you know why cause karma is a bitch . Is the given statement hateful?	1	yes
The following statement was labeled non-hateful by 50% annotators: and he was given a traditional moslem sea burial . Is the given statement hateful?	1	non-hateful
The following statement was labeled non-hateful by 50% annotators: we are white people stop being a nigger apologist . Is the given statement hateful?	0	yes
The following statement was labeled non-hateful by 50% annotators: desperately searching for a queer jewish romance that is not <number> ultra orthodox angst or <number> unbearably twee conflictless slice of life lesbians . Is the given statement hateful?	1	non-hateful
The following statement was labeled non-hateful by 50% annotators: maybe a blood nigger will put a bullet in his head . Is the given statement hateful?	0	yes
The following statement was labeled non-hateful by 50% annotators: lmao i am no pump and dumper nor am i a kike but i definitely follow some kike stereotypes . Is the given statement hateful?	1	non-hateful
The following statement was labeled non-hateful by 50% annotators: i have seen a lot of criticism of women for being unmarried childless and having previous relationships with non whites most of it comes from irony bros which is ironic since it describes them too . Is the given statement hateful?	1	non-hateful
The following statement was labeled non-hateful by 50% annotators: in other jwo news trump plans to meet with kissinger yesterday that kike kissinger said he wants to nuke n korea . Is the given statement hateful?	0	yes
The following statement was labeled non-hateful by 50% annotators: if credible calls to violence are not protected speech how are americans expected to carry out their duty of throwing off the chains of a tyrannical government serious question <user> . Is the given statement hateful?	1	non-hateful
The following statement was labeled non-hateful by 50% annotators: you can surround yourself with a bunch of white virtue signaling bata males all you want but that narrative goes away the second blacks talk about how scared they are just because they lost an election or one cop shoots a black criminal in self defense . Is the given statement hateful?	0	no
The following statement was labeled non-hateful by 50% annotators: even better her future vid series on what it like to be a single mom after her nigger bf realizes he has one sweet getaway car after he knocks her up . Is the given statement hateful?	0	yes
The following statement was labeled non-hateful by 50% annotators: i have read your talmud kikess you are lying through your teeth you filthy jew whores conquer nations through subversion of culture and intermarrying in order to dilute white genes and create more little yidlets that why jewishness is passed via matrilineality gas yourself . Is the given statement hateful?	0	yes
The following statement was labeled non-hateful by 50% annotators: <user> d islamexplorer bro 😂 . Is the given statement hateful?	1	non-hateful
The following statement was labeled non-hateful by 50% annotators: i am sorry if this upsets someone but honestly to whoever started the leaks 🖕 🏻 we support toni storm . Is the given statement hateful?	1	non-hateful
The following statement was labeled non-hateful by 50% annotators: liz truss is a fucking disgrace . Is the given statement hateful?	1	yes
The following statement was labeled non-hateful by 50% annotators: i have not paid attention to this cunt at all but whatever conceivable sexcapades she may or may not have gotten up to with trump they can not be nearly as gross and degenerate as what faggot kike anderson cooper has done . Is the given statement hateful?	0	yes
The following statement was labeled non-hateful by 50% annotators: <user> i would post a reply to this on facebook but i am currently banned for <number> days for calling someone white trash as he was posting absolutely vile and horrible comments about greta thunberg yet i get banned i hope facebook burns . Is the given statement hateful?	1	no
The following statement was labeled non-hateful by 50% annotators: great starbucks is now going to pay these two off and adopt an official policy of do not call the cops on nogs then nogs are going to take over the place hoping for a payout i cannot wait for starbucks to become as ghetto tier as chuckecheese . Is the given statement hateful?	0	no
The following statement was labeled non-hateful by 50% annotators: i wonder if this jewish teacher argued to dismiss the case against him because the talmud clearly states that goyim children were not human of course they bring the muzzies partly because these mohammedan degenerates have no problem what so ever with this sort of outrageous behaviour . Is the given statement hateful?	0	yes
The following statement was labeled non-hateful by 50% annotators: retarded honky nigger faggot cunt bitch am i going to be banned for <number> hours oh this is not twitter . Is the given statement hateful?	0	yes
The following statement was labeled non-hateful by 50% annotators: if you think ronaldo is better than messi you are either a liar or a retard . Is the given statement hateful?	1	yes
The following statement was labeled non-hateful by 50% annotators: i would not laugh too hard you are a nigger too <happy> . Is the given statement hateful?	1	yes
The following statement was labeled non-hateful by 50% annotators: apparently this nigger does not know how america was created . Is the given statement hateful?	0	yes
The following statement was labeled non-hateful by 50% annotators: can anyone be any more ignorant than muslim shit skin pedophile beating up on crippled boy if you see this happen in your community feel free to slit that muslims throat society will thank you in that country the crippled boy will be charged with inciting violence against islam . Is the given statement hateful?	0	yes
The following statement was labeled non-hateful by 50% annotators: keep me from drawing fanart for the second save nct dream episode they all look so cute in traditional clothes omg . Is the given statement hateful?	1	non-hateful
The following statement was labeled non-hateful by 50% annotators: <user> <user> <user> <user> <user> <user> <user> he is that guy that can not take a loss even though his team is trash instead he wants to fight irl like trailer trash you mad bro 😂 . Is the given statement hateful?	1	no
The following statement was labeled non-hateful by 50% annotators: piss off you thirsty brown thot no one asked you i do not listen to chubby street shitters or kike manlets . Is the given statement hateful?	0	yes
The following statement was labeled non-hateful by 50% annotators: kikes are from poland not only are you demoralized but you are retarded as well . Is the given statement hateful?	0	yes
The following statement was labeled non-hateful by 50% annotators: every barber shop has a slut that one nigga that goes to any barber to get his haircut and has no sense of barber loyalty it me i am the slut . Is the given statement hateful?	1	yes
The following statement was labeled non-hateful by 50% annotators: brighton is a ghetto and needs the acts of winnie mandela justice has been pronounced . Is the given statement hateful?	1	no
The following statement was labeled non-hateful by 50% annotators: i doubt he travelled anywhere just to rape anyone thats just how muslims are especially the muslim niggers they just rape whoever whenever they can wherever they happen to be even a pony at a childrens zoo in germany seriously look it up 🙄 . Is the given statement hateful?	0	yes
The following statement was labeled non-hateful by 50% annotators: the vile cult known as islam is not compatible with america or american values and the constitution it is a disgusting religion that is based in violence and filth . Is the given statement hateful?	0	hateful
The following statement was labeled non-hateful by 50% annotators: as i have said before if you have not been called a kike nigger faggot on gab you are doin it wrong <happy> i hope you get better soon flu sucks . Is the given statement hateful?	0	yes
The following statement was labeled non-hateful by 50% annotators: do not worry they are exterminating the blacks and asians too . Is the given statement hateful?	0	no
The following statement was labeled non-hateful by 50% annotators: <user> those hindus in muslim countries r refugees if no then dlt this tweet . Is the given statement hateful?	1	non-hateful
The following statement was labeled non-hateful by 50% annotators: perspective what would you were told that police hated you because you are black real or not then seeing things like this done to someone black i challenge you to find something similar done to a white girl especially a rich white girl over a speeding ticket . Is the given statement hateful?	1	non-hateful
The following statement was labeled non-hateful by 50% annotators: instead of telling muslims to not go to mosques directly tackle rising islamophobia and start taking white terrorism seriously . Is the given statement hateful?	1	non-hateful
The following statement was labeled non-hateful by 50% annotators: this is a great example of a fake white who would be willing to sell you out to the moslem just because you do not agree with him even if you are white traitor . Is the given statement hateful?	1	yes
The following statement was labeled non-hateful by 50% annotators: <user> i liked kill the jews with thumbs up better . Is the given statement hateful?	0	no
The following statement was labeled non-hateful by 50% annotators: white americans should learn yoga history acknowledge the cultural appropriation they engage in and possibly reduce the cost of yoga classes for poor people a group that often includes people of color and recent immigrants such as indian women to whom this practice rightfully belongs gandhi argued . Is the given statement hateful?	1	non-hateful
The following statement was labeled non-hateful by 50% annotators: uh no just no if i have to start glorifying queers in order to get royalty checks i will stop doing photography thankyouverymuch . Is the given statement hateful?	1	non-hateful
The following statement was labeled non-hateful by 50% annotators: <user> blacks muzzys wetbacks first . Is the given statement hateful?	0	yes
The following statement was labeled non-hateful by 50% annotators: i really think the msm the left should stop using refugee immigrant illegal aliens as synonymous terms refugees are escaping dangerous situations immigrants are likely seeking economic opportunities illegal aliens are law breakers right from the jump these are not the same circumstances . Is the given statement hateful?	1	no
The following statement was labeled non-hateful by 50% annotators: where the gay girls at . Is the given statement hateful?	1	non-hateful
The following statement was labeled non-hateful by 50% annotators: you can not expect a minority immigrant refugee to understand the intricacies of american racist rhetoric . Is the given statement hateful?	1	non-hateful
The following statement was labeled non-hateful by 50% annotators: i so hope this jew hating pope is killed by one of his muslim buddies . Is the given statement hateful?	0	hateful
The following statement was labeled non-hateful by 50% annotators: he joking around by not mentioning that she muzzie but focusing on the olympic achievement that omission is the joke it a bit subtle and not every tweets a winner baby . Is the given statement hateful?	1	non-hateful
The following statement was labeled non-hateful by 50% annotators: its kinda mad how i go around saying ima muslim yet i know nothing about my religion . Is the given statement hateful?	1	non-hateful
The following statement was labeled non-hateful by 50% annotators: <user> when white ppl are speaking for us and ignoring the fact that racism is something which exist in every country in my country white ppl were attacked and raped black ppl were slaves for us etc tweeting such bs will not end racism it only helps racism . Is the given statement hateful?	1	non-hateful
The following statement was labeled non-hateful by 50% annotators: yes they do ours hates niggers she goes nuts anytime she see a nigger buck or sow . Is the given statement hateful?	0	yes
The following statement was labeled non-hateful by 50% annotators: <number> <number> <percent> of brits think multiculturalism is a failure i guess the other <percent> are happy with their muzzie master there no great in britain anymore soon big ben will be converted into a minaret . Is the given statement hateful?	0	hateful
The following statement was labeled non-hateful by 50% annotators: how can you blame blacks when majority of the state is white why do not you throw the blame on white republicans that decided to stay home with their conscious . Is the given statement hateful?	1	non-hateful
The following statement was labeled non-hateful by 50% annotators: females get relationship advice from they friends that can not even keep a nigga 🥴 . Is the given statement hateful?	1	yes
The following statement was labeled non-hateful by 50% annotators: stupid nigger nazi oh noes don t read the vox day blawg nothing to see there pay attention to us as we alienate every normal person we come in contact with stupid nigger nazis need to have their noses rubbed in the turds they leave on the carpets . Is the given statement hateful?	0	yes
The following statement was labeled non-hateful by 50% annotators: there shouldnt be an arguement against this but once the queers got a voice it was prolly too late . Is the given statement hateful?	0	no
The following statement was labeled non-hateful by 50% annotators: my argument to repealthe19th is simple <number> voting either directs violence or is a substitute <number> men participate in organized violence women do not <number> women vote differently than men the farther the results of elections and violence diverge the less stable is democracy and the more likely violence . Is the given st…	1	no
The following statement was labeled non-hateful by 50% annotators: i know what you are getting at and yes a part of it is definitely immigrants from countries with different and backwards cultures who are not intergrating and whose number is too larged to be properly absorbed by the country . Is the given statement hateful?	1	no
The following statement was labeled non-hateful by 50% annotators: put some cake onna nigga head . Is the given statement hateful?	1	yes
The following statement was labeled non-hateful by 50% annotators: <user> <user> who was so atrocious that even nazis feared them the red army . Is the given statement hateful?	1	non-hateful
The following statement was labeled non-hateful by 50% annotators: <user> netflix will you be releasing a homosexual movie about profit mohammad just in time for eid just wondering . Is the given statement hateful?	0	non-hateful
The following statement was labeled non-hateful by 50% annotators: we wuz jesus too tariq racist retarded nigger nasheed . Is the given statement hateful?	0	yes
The following statement was labeled non-hateful by 50% annotators: this nigga is sitting across from me and keep slandering gay people . Is the given statement hateful?	1	yes
The following statement was labeled non-hateful by 50% annotators: from <date> to <date> the office of refugee resettlement received a total of <number> allegations of sexual abuse or sexual harassment from the government funded detention facilities and only <number> were referred to the justice dept . Is the given statement hateful?	1	no
The following statement was labeled non-hateful by 50% annotators: islam isis finally admits its leader abu bakr al baghdadi is dead think this is about 1 0 0 th time this islam terrorist leader has been confirmed dead rem mussie ohell creator of isis let him out of gitmo to become isis leader used asswipe yes both of them <user> <user> . Is the given statement hateful?	0	no
The following statement was labeled non-hateful by 50% annotators: current year game of clue <number> obama champion of change winner killed gay wetback couple or gay married hispanics at fl college with a <number> day old bridge memewar <user> ‍ would you make a current year game of clue shirt . Is the given statement hateful?	0	no
The following statement was labeled non-hateful by 50% annotators: this is why its so important to tell people that hitler put the jews in hotels not concentration camps where they spent the entire war laughing and playing soccer while their enemies killed each other jews must pay for the crime against humanity that is called ww2 . Is the given statement hateful?	0	yes
The following statement was labeled non-hateful by 50% annotators: says it all does not it when we are told that if brexit does not happen there will be violence on the streets but if we crash out with no deal which is unlawful nothing what does that say about the people mob rule maybe . Is the given statement hateful?	1	non-hateful
The following statement was labeled non-hateful by 50% annotators: <user> the white helmets are the errand boys to al qaeda isis al nusra and the other jihadi extremist groups . Is the given statement hateful?	1	non-hateful
The following statement was labeled non-hateful by 50% annotators: royal wigger took his monkey to brixton ghetto today for a visit to a nigger radio station white briton homeless can wait harry the humanitarian does not have time for them diversity takes priority for harry the halfwit megnog trying to play shy and demure was nauseating trashy stripper . Is the given statement hateful?	0	yes
The following statement was labeled non-hateful by 50% annotators: true acne vulgaris in adult women may be due pregnancy or disorders such as polycystic ovary syndrome hirsutism or cushing syndrome . Is the given statement hateful?	1	no
The following statement was labeled non-hateful by 50% annotators: wow i love this premier content of you calling people faggots all day it a clear sign of intellectual dominance . Is the given statement hateful?	1	yes
The following statement was labeled non-hateful by 50% annotators: i did not realize the multicult turned on buddhists so long ago i always used them around shit libs when they said trump is a national embarrassment they care much about what euro cucks and muzzies think . Is the given statement hateful?	0	yes
The following statement was labeled non-hateful by 50% annotators: <user> <user> <user> <user> <user> idk whyd you link it to wanting to kill illegal immigrants you do know that non white people can buy guns right or should i go take them from my black friends . Is the given statement hateful?	1	no
The following statement was labeled non-hateful by 50% annotators: i have just escaped the fb ghetto and am in search of normal trump2020 patriot followme . Is the given statement hateful?	1	non-hateful
The following statement was labeled non-hateful by 50% annotators: most bulldykes were just born ugly and have been rejected by men all their lives attractive or feminine lesbos were mostly raped or abused by men an ugly woman is a safe substitute for them . Is the given statement hateful?	0	no
The following statement was labeled non-hateful by 50% annotators: lrt only white people can fuck up queso like that huh . Is the given statement hateful?	1	no
The following statement was labeled non-hateful by 50% annotators: you follow a sand nigger religion you muppet you are level of disconnect is phenomenal . Is the given statement hateful?	0	hateful
The following statement was labeled non-hateful by 50% annotators: my family crest is a fucking dragon bitch 🐉 🐲 . Is the given statement hateful?	1	yes
The following statement was labeled non-hateful by 50% annotators: so true the music i posted tonight is mostly pro white and non jewish maybe zombie is some what not it was released by a jewish owned studio but it is not full of degenerate crap like most . Is the given statement hateful?	1	no
The following statement was labeled non-hateful by 50% annotators: it was mostly done so african and moslem artifacts can be planted as evidence to suggest that real swedes are not indigenous to sweden . Is the given statement hateful?	1	non-hateful
The following statement was labeled non-hateful by 50% annotators: stop all that coon shit early morning cartoon shit this is that goon shit fuck up your whole afternoon shit . Is the given statement hateful?	0	yes
The following statement was labeled non-hateful by 50% annotators: no shit but if you do not think blacks and mexicans and white supremacists do not get into fights you are naive and have no clue . Is the given statement hateful?	1	no
The following statement was labeled non-hateful by 50% annotators: bampumim teixeira an immigrant from west africa . Is the given statement hateful?	1	non-hateful
The following statement was labeled non-hateful by 50% annotators: sprinkling adderall on my morning bagel hi i am calling to schedule an outlook meeting with your director if you could return my call . Is the given statement hateful?	1	non-hateful
The following statement was labeled non-hateful by 50% annotators: <user> i bet but whoever knows about the series should not goku barely did it with mui so without it he d get raped gogeta mash down broly so if he wanted to kill broly that would have happened . Is the given statement hateful?	1	non-hateful
The following statement was labeled non-hateful by 50% annotators: getting sick of not taking action everyone a kike . Is the given statement hateful?	0	yes
The following statement was labeled non-hateful by 50% annotators: <user> spanish is the 2 nd most spoken language on the planet even i speak spanish but no white person would learn arabic for fun and i stated that i was african arab in my tweets stop clowning yourself for assuming my race like that . Is the given statement hateful?	1	non-hateful
The following statement was labeled non-hateful by 50% annotators: it okay to be white it okay to be black it okay to be asian it okay to be a woman it okay to be a man it okay to be gay it okay to be straight you all taste the same . Is the given statement hateful?	1	non-hateful
The following statement was labeled non-hateful by 50% annotators: <user> and everything everything book movie i ’ ve watched crazy rich asians yesterday amp i loved it . Is the given statement hateful?	1	non-hateful
The following statement was labeled non-hateful by 50% annotators: this is just because of that queer eye video going around and people in the mentions being all crazy about bernie or whoever else and just they are politicians stop idolizing them to this degree pls it weird . Is the given statement hateful?	1	non-hateful
The following statement was labeled non-hateful by 50% annotators: <user> <user> <user> <user> <user> <user> <user> <user> just like she dismissed all the women girls her husband raped assaulted and molested . Is the given statement hateful?	1	no
The following statement was labeled non-hateful by 50% annotators: steven universe spoiler steven won by roasting white wtf . Is the given statement hateful?	1	no
The following statement was labeled non-hateful by 50% annotators: good lord eliaundelis i ’ m a good lancer of the parchment not a queer sculptor . Is the given statement hateful?	1	no
The following statement was labeled non-hateful by 50% annotators: moral of the story niggas be lying . Is the given statement hateful?	1	yes
The following statement was labeled non-hateful by 50% annotators: yo hotep babydaddy aint send your child support on time so you tryna lash out at the huuwhyte man lmao relax moolie you know niggas is always late stop hyperventilating he will give ya <money> soon enough . Is the given statement hateful?	0	yes
The following statement was labeled non-hateful by 50% annotators: how dare you oakland mayor libby schaaf and governor jerry brown put our national security at risk think that illegal immigrants are more important than american citizens put american citizens and law enforcement officers lives in danger . Is the given statement hateful?	1	yes
The following statement was labeled non-hateful by 50% annotators: <user> i am fed up w this nigger . Is the given statement hateful?	0	yes
The following statement was labeled non-hateful by 50% annotators: french mayors panic as invading muslime migrants overwhelm cities keep your borders open french president moron there are more muslimes looking for freebies and to take over your nation muslimes are no value added to france or any european nation or america deport putin says syria war over . Is the given statement hateful?	0	hateful
The following statement was labeled non-hateful by 50% annotators: all these niggas wearing durags but none of these niggas spinnin 😂 🤣 🤔 . Is the given statement hateful?	1	yes
The following statement was labeled non-hateful by 50% annotators: <user> wow this is basically the queer version of saying being gay is evil this is wild and not in a good way at all also as the thread continues comparing sexual orientation to racism is both a reach and just bad . Is the given statement hateful?	1	non-hateful
The following statement was labeled non-hateful by 50% annotators: with so many switching from twitter to gab they should be known as twitter refugees lol 😎 😃 😂 . Is the given statement hateful?	1	non-hateful
The following statement was labeled non-hateful by 50% annotators: zojuist gab geïnstalleerd naar aanleiding van de nieuwe duitse wetgeving we moeten niet lijdzaam toezien hoe onze hard bevochten vrijheden worden afgenomen . Is the given statement hateful?	1	no
The following statement was labeled non-hateful by 50% annotators: <user> <user> that ’ ghetto okay 😂 😭 . Is the given statement hateful?	1	no
The following statement was labeled non-hateful by 50% annotators: <user> he is a commie muzzy white hating cunt who is at war with america hang him for treason . Is the given statement hateful?	0	yes
The following statement was labeled non-hateful by 50% annotators: not surprising when the white majority has had marxist propaganda shoved down their throats by kikes for decades from all angles pedowood talmudvision print media all jew owned and pushing poz <number> <number> public school systems and higher academia infested with commie jews dictating the curriculum . Is the given statement hat…	0	yes
The following statement was labeled non-hateful by 50% annotators: why does anyone care what the albino nigger has to say . Is the given statement hateful?	0	yes
The following statement was labeled non-hateful by 50% annotators: <user> and this is why im gonna go join the nazi atleast they dont hide or change their views every day . Is the given statement hateful?	1	no
The following statement was labeled non-hateful by 50% annotators: want to pay for roads with taxes make pumpkin spice everything lovers pay that tax fuck those basic hoes and fuck them hoe ass roads . Is the given statement hateful?	1	yes
The following statement was labeled non-hateful by 50% annotators: the cops will investigate this bacon attack but do not have the resources to investigate young girls being raped by fucking mudslimes time for a revolution time to hang the traitors in the public square . Is the given statement hateful?	0	yes
The following statement was labeled non-hateful by 50% annotators: <user> <user> white coats come along ma am hillary oh i seem to have lost a shoe white coats come along ma am . Is the given statement hateful?	1	non-hateful
The following statement was labeled non-hateful by 50% annotators: <user> i hate you . Is the given statement hateful?	1	yes
The following statement was labeled non-hateful by 50% annotators: every last one with a drop of jew blood how do you actually foment a reasonable theory of who and are not gentlemen when the nazis inducted jews into jugend and put them on the cover of their family oriented magazines . Is the given statement hateful?	0	no
The following statement was labeled non-hateful by 50% annotators: <user> basically an early version mentioned every victim of the holocaust except the jewish people . Is the given statement hateful?	1	non-hateful
The following statement was labeled non-hateful by 50% annotators: good to know that that time when a bunch of blacks gang raped a white girl then pissed on her face while telling her that for <number> years of slavery bitch was by definition not racism . Is the given statement hateful?	0	hateful
The following statement was labeled non-hateful by 50% annotators: my mom went out and wore a mask and she said two old men told her that she “ looks like the asians ” i cant believe . Is the given statement hateful?	0	no
The following statement was labeled non-hateful by 50% annotators: <user> <user> what else is new fabricating racial tensions blacks are very good at lying about white racial attacks only hurts those truly attacked . Is the given statement hateful?	1	non-hateful
The following statement was labeled non-hateful by 50% annotators: <user> chutiye im n indian muslim we fought for freedom gandu . Is the given statement hateful?	1	non-hateful
The following statement was labeled non-hateful by 50% annotators: well now that that over time for me to hoe out 💃 🏻 . Is the given statement hateful?	1	non-hateful
The following statement was labeled non-hateful by 50% annotators: <user> <user> tell that to trayvon or any other dumb nigger that got shot beating ontop of a cop theres more bodycam footage to disprove your theory than your brain could comprehend . Is the given statement hateful?	0	yes
The following statement was labeled non-hateful by 50% annotators: chicago annual illegal alien related expenses are <number> million and their annual annual deficit is <number> million you do the math . Is the given statement hateful?	1	no
The following statement was labeled non-hateful by 50% annotators: sad story to be sure on a side note some guys should not ever wear tank tops how does any take that spaghetti armed guy serious dress like a white man that nigger shit unless you are in the gym . Is the given statement hateful?	0	yes
The following statement was labeled non-hateful by 50% annotators: <user> some of me mates play in that division and i must say they all look malnourished 😋 . Is the given statement hateful?	1	non-hateful
The following statement was labeled non-hateful by 50% annotators: <user> do you think this is a fucking game . Is the given statement hateful?	1	no
The following statement was labeled non-hateful by 50% annotators: we need to start punching arabs for saying the n word . Is the given statement hateful?	0	no
The following statement was labeled non-hateful by 50% annotators: tnb what else can we expect from the ghetto monkeys . Is the given statement hateful?	0	no
The following statement was labeled non-hateful by 50% annotators: feel good story spic forced out of his job build the wall . Is the given statement hateful?	0	no
The following statement was labeled non-hateful by 50% annotators: i regret to inform of ur imminent demise men put ur phones down look ur women in the eye . Is the given statement hateful?	1	no
The following statement was labeled non-hateful by 50% annotators: that probably what muslim women think it all about trust . Is the given statement hateful?	1	non-hateful
The following statement was labeled non-hateful by 50% annotators: you are a fucking mush brain jew i fucking know that about iq and never said any different i said that a shitskin thinks a white woman is an upgrade because they do because she is you are like in the mossad special education classes for slow jews or something . Is the given statement hateful?	0	yes
The following statement was labeled non-hateful by 50% annotators: according to shia islam the devil makes you gay if you are not a shia someone get the vp on the line and let see how many volts it going to take to shock the gay out of all of those goatfuckers . Is the given statement hateful?	0	yes
The following statement was labeled non-hateful by 50% annotators: i love this hashtag so much muslimsforshawn ❤ ️ . Is the given statement hateful?	1	non-hateful
The following statement was labeled non-hateful by 50% annotators: moslems are not allowed to codemn the terrorists all moslems are to commit violent war jihad the main jihad btw and the only guaranteed path to moslem paradise as long as some in the community are doing this jihad terror it absolves the rest of their responsibility hence the silence . Is the given statement hateful?	0	non-hateful
The following statement was labeled non-hateful by 50% annotators: <user> devildog put both on to a spectrum the number of radical muslims that support carrying out jihad is big the number of radical jews that support and employ the talmud is small in comparison yet their leverage in media financing academia and politics is revealing bad influence on both . Is the given statement hateful?	1	non-hateful
The following statement was labeled non-hateful by 50% annotators: when are trump and congress going to do something about fags and dykes shutting down christian bakeries maga . Is the given statement hateful?	0	yes
The following statement was labeled non-hateful by 50% annotators: so according to sky news any italian political party who is staunchly anti immigration anti eu are neo fascists these leftie multicul moslem loving lunatics need culling or locking up in a straight jackets in reality they are the fascists . Is the given statement hateful?	0	yes
The following statement was labeled non-hateful by 50% annotators: tranny do you all remember the story of deandre harris it gripped the nation in august today he sat through two hours of a grueling soul crushing cross examination i know i have been cross examined by the same man deandre harris is a nigger terrorist who deserves to die of sickle cell . Is the given statement hateful?	0	yes
The following statement was labeled non-hateful by 50% annotators: laura loomer ‏ <user> 7 m7 minutes ago laura loomer retweeted laura loomer how many dead people are going to be voting in the californiaprimary today voterfraud laura loomer added laura loomer <user> how many illegal immigrants are going to be voting in the californiaprimary today . Is the given statement hateful?	1	non-hateful
The following statement was labeled non-hateful by 50% annotators: <user> <user> but nokuthula is the first barrier to their businesses so they are protecting nokuthula so we can see that having white protection gives you ultimate protection you know the house negro shows of benefits of being one mugabe was for the people gaddafi for africa hani for africa . Is the given statement hateful?	1	no
The following statement was labeled non-hateful by 50% annotators: it seems that the whole blm movement boomeranged on blacks in the ghettos ytd in <number> homicides in chicago are down from the same period in <number> but are still way up from the same time period in <number> . Is the given statement hateful?	1	non-hateful
The following statement was labeled non-hateful by 50% annotators: give me three raghead desert fuckers i can teach and whip those fuckers into americanism . Is the given statement hateful?	0	yes
The following statement was labeled non-hateful by 50% annotators: 1 8 th century mayhem and lawlessness had nothing on loud mouthed donald trump the republicans of today congress these buffoons will be short lived 🙏 but i thought violation of twitter rules included threats and incitement to violence why has not twitter shut dopey donny down . Is the given statement hateful?	1	no
The following statement was labeled non-hateful by 50% annotators: looks like this fat fuck muzzie has not missed too many meals probably on the us tax payers dime these inbred muscum are the ugliest people in the world . Is the given statement hateful?	0	yes
The following statement was labeled non-hateful by 50% annotators: anywhere there are large numbers of jews such as jew york you will find lots of dirt and garbage that because jews are rats in quasi human form . Is the given statement hateful?	0	yes
The following statement was labeled non-hateful by 50% annotators: there a special contingent of young white leftist women who seethe with contempt towards older women while ignoring poc just say you hate your mom and go . Is the given statement hateful?	1	non-hateful
The following statement was labeled non-hateful by 50% annotators: i do not give a fuck kill them all and let god sort them out i am done with this sandnigger shit . Is the given statement hateful?	0	yes
The following statement was labeled non-hateful by 50% annotators: <user> mr trump if anyone had questions as to weather or not you should be removed from the white house this tweet should put people at rest as to your fitness we <will> remove you and then the trials will start in earnest you can call it ex presidential harassment . Is the given statement hateful?	1	non-hateful
The following statement was labeled non-hateful by 50% annotators: hackney south not quite so nigger these days more turk turds sorry kurds but hackney north with diane abacus is black in the main . Is the given statement hateful?	0	no
The following statement was labeled non-hateful by 50% annotators: i know there women who lie about getting raped but when there proof how tf can you justify that cause it your boy you all niggas are real life weirdos you all mothers should of never birthed you all forreal mal paridos . Is the given statement hateful?	1	yes
The following statement was labeled non-hateful by 50% annotators: good question if i have not eaten already i would of been triggered into getting one right now however that can wait tomorrow mm the one pizza you know a sand nigger will not make touch . Is the given statement hateful?	0	yes
The following statement was labeled non-hateful by 50% annotators: looks like theyre a bunch of sluts too this is nigger tier propoganda . Is the given statement hateful?	0	yes
The following statement was labeled non-hateful by 50% annotators: that the kind of trolling that makes the jews in israel want to kill him god bless that brave brave man and keep him safe from his enemies . Is the given statement hateful?	1	no
The following statement was labeled non-hateful by 50% annotators: skinhead dyke cunt . Is the given statement hateful?	0	yes
The following statement was labeled non-hateful by 50% annotators: <user> <user> <user> <user> <user> go back to your tv trailer trash and listen to cnn some more any acts of violence is disgusting left or right . Is the given statement hateful?	1	non-hateful
The following statement was labeled non-hateful by 50% annotators: yu really can not save these hoes they do not wanna be saved . Is the given statement hateful?	1	yes
The following statement was labeled non-hateful by 50% annotators: need a sim card asap dis getting ghetto . Is the given statement hateful?	1	no
The following statement was labeled non-hateful by 50% annotators: how do you plan to combat the narrative with your muh optics shit because last i checked optics fags would rather bitch and moan than get out and do anything . Is the given statement hateful?	0	yes
The following statement was labeled non-hateful by 50% annotators: queer eye is my shit a bitch is addicted . Is the given statement hateful?	1	yes
The following statement was labeled non-hateful by 50% annotators: how to tell if a game engineering job in santa ana ca it a literal white supremacist nazi . Is the given statement hateful?	1	no
The following statement was labeled non-hateful by 50% annotators: shoutout to <user> for conflating punjabi people sikhs with the towelhead trope go off sis i suppose . Is the given statement hateful?	1	no
The following statement was labeled non-hateful by 50% annotators: <user> don ’ t retweet ls mark on my timeline he ’ homophobic for saying the f word <user> . Is the given statement hateful?	1	non-hateful
The following statement was labeled non-hateful by 50% annotators: <user> i kept twitching with every single time he virtue signaled about the immigrants and refugees tearing down the middle aged white male . Is the given statement hateful?	1	non-hateful
The following statement was labeled non-hateful by 50% annotators: got kicked out of facebook again for <number> days because i called a muzzi alla a pedophile and a pervert no 1 st amendment over there the muzzis can call christians anything they want but not the other way around . Is the given statement hateful?	0	yes
The following statement was labeled non-hateful by 50% annotators: time for realjustice bcuz islam is a cancer on humanity that needs to be eradicated not enabled purge deport crusade white europeans have to get their mojo back fireuptheovens . Is the given statement hateful?	0	yes
The following statement was labeled non-hateful by 50% annotators: spic nigger chink are just three examples . Is the given statement hateful?	0	yes
The following statement was labeled non-hateful by 50% annotators: niggas be knowing and be cool with everybody . Is the given statement hateful?	1	no
The following statement was labeled non-hateful by 50% annotators: <user> <user> lmfao . Is the given statement hateful?	1	no
The following statement was labeled non-hateful by 50% annotators: tbh the only dm i have not muted is bc girl that bitch is cute <user> . Is the given statement hateful?	1	no
The following statement was labeled non-hateful by 50% annotators: these muhfuckas being ungrateful like a dirtyass nigger werd . Is the given statement hateful?	0	yes
The following statement was labeled non-hateful by 50% annotators: <number> <number> statements issued by va state police in the aftermath of last weekend violence directly contradict inflammatory claims made by gov terry mcauliffe that white supremacist groups stashed weapons around town in advance of the unite the right rally against the removal of confederate statues . Is the given statement h…	1	non-hateful
The following statement was labeled non-hateful by 50% annotators: when you choose to do the exact same thing as the queers and nogs are doing because you are retarded . Is the given statement hateful?	0	yes
The following statement was labeled non-hateful by 50% annotators: i think something very bad is going on and i think its to do with the <number> million white girls raped by pakistani muslims plus all the paedophiles the hunters are catching i have not crossed the t or dotted the i d but something is not adding up . Is the given statement hateful?	0	no
The following statement was labeled non-hateful by 50% annotators: no nigger bich taking da last pack of spare ribs when i am around . Is the given statement hateful?	0	yes
The following statement was labeled non-hateful by 50% annotators: <user> <user> there are very poor uneducated whites who are racist toward rich blacks who has the power not the white person he economically socially and culturally not in a position of power compared to the educated african american where the institutionalized power now . Is the given statement hateful?	1	non-hateful
The following statement was labeled non-hateful by 50% annotators: them scam us with white blackberry black blackberry . Is the given statement hateful?	1	no
The following statement was labeled non-hateful by 50% annotators: im here im queer and im full of fear for my future career a poem by a stressed gay a k a me . Is the given statement hateful?	1	non-hateful
The following statement was labeled non-hateful by 50% annotators: <user> <user> are they considered refugees if they broke the law before the storm not trolling genuinely curious about when the refugee status is applied . Is the given statement hateful?	1	non-hateful
The following statement was labeled non-hateful by 50% annotators: american neoconservatives canadian liberals and european leftists hate russia why because russia is white christian traditional and conservative russia is building orthodox churches rejects the homosexual agenda and opposes multiculturalism russia today is reminiscient of western europe <number> years ago russia is not cucked . Is…	0	non-hateful
The following statement was labeled non-hateful by 50% annotators: not happy w trump disavowing altright nazis nothing can be further from the truth spencer whoever is just obama cia plant trump border wall refugee vetting intent ending sanctuary cities are viewed as racist by left will he backtrack now maga presidenttrump newyorkvalues . Is the given statement hateful?	1	non-hateful
The following statement was labeled non-hateful by 50% annotators: nia vardalos in my big fat greek wedding made me gay . Is the given statement hateful?	1	non-hateful
The following statement was labeled non-hateful by 50% annotators: can faggot stop being a derogatory term for gays and start being a derogatory term for just terrible men in general because i really like the word and honestly i have known a lot of faggots in my life and they were not homosexuals . Is the given statement hateful?	1	no
The following statement was labeled non-hateful by 50% annotators: ffs just seen yet another <user> report that has failed correctly report the basic facts correctly so much for basic research . Is the given statement hateful?	1	non-hateful
The following statement was labeled non-hateful by 50% annotators: what about the john kerrys theresea heinz hugh hefners bill gates there are a lot of white looking jews in the us government look at the rash of presidential daughters with interracial marriages . Is the given statement hateful?	1	non-hateful
The following statement was labeled non-hateful by 50% annotators: yeah that one was special he got really mad at people that called him out on it too it a common kike tactic that the ragheads picked up on too . Is the given statement hateful?	0	yes
The following statement was labeled non-hateful by 50% annotators: these women making the allegations were willing to chuck their self respect to be part of a scene or to advance their careers while those who knew what was happening allegedly looked the other way to protect their position or because they were personal friends with knowles faraci . Is the given statement hateful?	1	non-hateful
The following statement was labeled non-hateful by 50% annotators: this is why god told his people to kill the queers and he cursed the land that permitted them leviticus <number> . Is the given statement hateful?	0	hateful
The following statement was labeled non-hateful by 50% annotators: <user> <user> this negro did not nothing wrong to you for you to burn him like that . Is the given statement hateful?	1	non-hateful
The following statement was labeled non-hateful by 50% annotators: if you are a woman and you drive over <number> mph on the freeway you are a lesbian sorry i do not make the rules do not worry we will take care of you now . Is the given statement hateful?	1	no
The following statement was labeled non-hateful by 50% annotators: no more racist than what you just said you know nothing and your nigger friends are useless . Is the given statement hateful?	0	yes
The following statement was labeled non-hateful by 50% annotators: whatever white people do asians dont have to follow . Is the given statement hateful?	1	non-hateful
The following statement was labeled non-hateful by 50% annotators: if they do not like it here they need to get the fuck of our lands and go back to sand nigger country crusade muslims getout . Is the given statement hateful?	0	yes
The following statement was labeled non-hateful by 50% annotators: im a pagan so fuck the bible the founding fathers would be pissed to see a nigger in office and melting pot of european culture not 3 rd world parasites any other . Is the given statement hateful?	0	yes
The following statement was labeled non-hateful by 50% annotators: <user> <user> shit they all look there same . Is the given statement hateful?	1	non-hateful
The following statement was labeled non-hateful by 50% annotators: king sobieski with his <number> k polish soldiers defeated <number> k arabs near vienna we will stop em again cuz the rotten west lost its balls . Is the given statement hateful?	0	no
The following statement was labeled non-hateful by 50% annotators: <user> happy birthday to one of the greatest muzzrat slayer may mahadev bless you and may you keep kicking these muzzrats n com rats in debate sir 🙌 🙌 🙌 🚩 🚩 🚩 🚩 🚩 jai mahishmati ✊ ✊ . Is the given statement hateful?	0	non-hateful
The following statement was labeled non-hateful by 50% annotators: michael the angels that betrayed a heavenly secret were banished from their place for one hundred and thirty eight years louis ginzberg 『 the legends of the jews 』 . Is the given statement hateful?	1	non-hateful
The following statement was labeled non-hateful by 50% annotators: imagine thinking that <user> is a homophobe because he said faggot once lmao could not be me . Is the given statement hateful?	1	no
The following statement was labeled non-hateful by 50% annotators: normie will not approve of his kike gassing platform but straight ticket voters gonna straight ticket which is usually enough to win . Is the given statement hateful?	0	yes
The following statement was labeled non-hateful by 50% annotators: left wing politicians allowing this for the muzzrat vote jo cox did not learn just saying . Is the given statement hateful?	0	no
The following statement was labeled non-hateful by 50% annotators: once again what the fuck are you babbling about no wonder you have such an abysmal post to score ratio you are a blithering nigger with a sub <number> iq and a sub <number> word vocabulary you should change your name to obamasucksatgab you worthless yid loving mooncricket . Is the given statement hateful?	0	yes
The following statement was labeled non-hateful by 50% annotators: its not a recent muslim invasion it happened to christians in libya egypt syria and sects in ukraine there are bad jews that bring bad to themselves . Is the given statement hateful?	1	no
The following statement was labeled non-hateful by 50% annotators: no most white men do not rape <number> year old women that department is saved for your compadre beaners and young black males . Is the given statement hateful?	0	yes
The following statement was labeled non-hateful by 50% annotators: flaring your nostrils in every photo is the new white trying to be black . Is the given statement hateful?	1	non-hateful
The following statement was labeled non-hateful by 50% annotators: nah baldwin might be making a good point here i have no love for the kike weinstein or the thots who whored themselves for money but baldwin can let the feminists and jews bash him for a while might redpill him and flip him from being a libtard . Is the given statement hateful?	0	yes
The following statement was labeled non-hateful by 50% annotators: i do not fuck with niggers little boy . Is the given statement hateful?	0	yes
The following statement was labeled non-hateful by 50% annotators: <user> yuel and societte might slightly edge them out and of course vira and kat but yeah very gay . Is the given statement hateful?	1	non-hateful
The following statement was labeled non-hateful by 50% annotators: <user> aww pidi <user> should also visit in countless kashmiri hindus living as refugees in various states from the delhi to andaman . Is the given statement hateful?	1	non-hateful
The following statement was labeled non-hateful by 50% annotators: catherine the only place to get white kids is from white women and the only way to overcome the invasion is white kids . Is the given statement hateful?	1	no
The following statement was labeled non-hateful by 50% annotators: started playing life like chess you niggas is pawns i headed straight for the king and queen they call the shots . Is the given statement hateful?	1	yes
The following statement was labeled non-hateful by 50% annotators: you all blame everybody and they momma except the nigga that cheated on you . Is the given statement hateful?	1	yes
The following statement was labeled non-hateful by 50% annotators: i ’ m a pretty bitch i don ’ t deserve to be stuck in bakersfield . Is the given statement hateful?	1	yes
The following statement was labeled non-hateful by 50% annotators: the only thing that makes a black ghetto as stinking black men selling drugs and committing crime because it cool and it in the hood these f coons who destroy society should be executed worthless s* screwing <censored> up societies throughout the world f***ing <censored> nigga c**ts <censored> . Is the given statement hateful?	0	yes
The following statement was labeled non-hateful by 50% annotators: can not believe that saad hariri undoing could be some white south african lady named like candijce van der p.w. botha foogejnschdat . Is the given statement hateful?	1	no
The following statement was labeled non-hateful by 50% annotators: little bit of coach effect finally going on today clawson petersen and sonny dykes and carey negative strong collins addazio and helton . Is the given statement hateful?	1	non-hateful
The following statement was labeled non-hateful by 50% annotators: i doubt that filth fucking bolshevik kike said that . Is the given statement hateful?	0	yes
The following statement was labeled non-hateful by 50% annotators: <user> khurram what on earth you are doing asking pertinent questions in a country of imbeciles pakistanis does not even have rudimentary understanding of government and institutional roles and responsiblities growing up our brains were raped by pak studies and islamiyat lessons . Is the given statement hateful?	1	yes
The following statement was labeled non-hateful by 50% annotators: a simple solution to not having queer kids 🤭 🤭 🤭 🤭 do not have children if you can not fully accept them you d be a horrible parent anyway do not worry you will not die alone your homophobia and close mindedness will soon manifest and keep you company xx . Is the given statement hateful?	1	yes
The following statement was labeled non-hateful by 50% annotators: <user> i am obvi a war queer til i get kidnapped by pirates during civil war <number> and become the ship queer at some point the pirates realize my pedigree and decide to make me their priestess at which point i transition to religious homosexual . Is the given statement hateful?	1	no
The following statement was labeled non-hateful by 50% annotators: stream every ghetto every city by clairo . Is the given statement hateful?	1	non-hateful
The following statement was labeled non-hateful by 50% annotators: <user> blonde hair and blue eyes these events are not the same but they both discriminate in a way and the white people will feel bad about the people killed in the holocaust cause but making poc . Is the given statement hateful?	1	non-hateful
The following statement was labeled non-hateful by 50% annotators: apparently he had a shirt with badges of the white power and ussr hammer and sickle symbols and another one that says born to kill sickening . Is the given statement hateful?	1	yes
The following statement was labeled non-hateful by 50% annotators: we have the most generous immigration policy but what is a concern is when illegal immigrants come and undermine a variety of the systems that work in order to make our society function madeleine albright . Is the given statement hateful?	1	non-hateful
The following statement was labeled non-hateful by 50% annotators: <number> intensity by anyone wearing black and gold right now fans included . Is the given statement hateful?	1	non-hateful
The following statement was labeled non-hateful by 50% annotators: contact me for a shirt that is black and in white says the global minority front white people on the back . Is the given statement hateful?	1	non-hateful
The following statement was labeled non-hateful by 50% annotators: yo why some old white guy start coming at me at the gas station cause my music is ghetto 😭 nigga said this is not the ghetto go somewhere else guy stfu once i said he looked broke tho . Is the given statement hateful?	1	yes
The following statement was labeled non-hateful by 50% annotators: no really would this retarded oaf that claims to be my father just hurry up and have a heart attack ¿ ¿ ¿ ¿ ¿ ¿ ¿ ¿ . Is the given statement hateful?	1	yes
The following statement was labeled non-hateful by 50% annotators: love that pic exactly where the nigger needs to be forthousands of years the nigger inferiority has been known . Is the given statement hateful?	0	yes
The following statement was labeled non-hateful by 50% annotators: south of the md is just as bad atlanta memphis nashville tampa jacksonville charlotte houston dallas nawlins etc the ol south is a memory you guys have been tossed away for blacks and muzzies . Is the given statement hateful?	0	yes
The following statement was labeled non-hateful by 50% annotators: <number> liners are old oredi bitches we old old dumb . Is the given statement hateful?	1	yes
The following statement was labeled non-hateful by 50% annotators: <user> you are easily the best youtuber out there but you are still a nigger . Is the given statement hateful?	0	yes
The following statement was labeled non-hateful by 50% annotators: get that person out of here rallies mexican immigrants r murderers rapist shootings russia if you are listening hacking we need to protect the whistleblower at all cost you know what we use to do to spies trump uses his platform to insite violence get results . Is the given statement hateful?	1	yes
The following statement was labeled non-hateful by 50% annotators: shes hoping some bluegum will rape her dried up old liberal ass . Is the given statement hateful?	1	yes
The following statement was labeled non-hateful by 50% annotators: just noticed that nigger has blonde hair ya see folks all of the shame and sins they put on whites is not about equality or fairness etc it is about controlling whites they hate whites they rub it in your faces . Is the given statement hateful?	0	yes
The following statement was labeled non-hateful by 50% annotators: jewtube is pushing the royal wedding so hard i dont give a rats behinders if some royal prince wants to muddy his bloodline england is fuct up with paki rape gangs but forget about that theres a royal wedding high pitched girl squeels puke . Is the given statement hateful?	0	yes
The following statement was labeled non-hateful by 50% annotators: sleep is difficult with jews trying to get america to war for israel against iran that seems to be back burner now thank god though i will not have a truly good night sleep until all semites moslem and jew alike are neutered for good . Is the given statement hateful?	0	yes
The following statement was labeled non-hateful by 50% annotators: uses a picture from the aftermath of a moslem terrorist attack d oh . Is the given statement hateful?	1	non-hateful
The following statement was labeled non-hateful by 50% annotators: the real question is why is a filthy piece of human excrement working with the elderly if it were my mother it would not have happened because i would not have let a filthy moslem in the door sweeds are retards . Is the given statement hateful?	0	yes
The following statement was labeled non-hateful by 50% annotators: bobamas homeland security dept did the same thing their first directive was to target military returning from theater as potential internal terrorist threat meanwhile bobama was inviting the muslim brotherhood into the white house to turn over all our secrets to them on a daily basis . Is the given statement hateful?	0	no
The following statement was labeled non-hateful by 50% annotators: i am not down with faggots thinking it cool to have non white allies making fun quirky content for us fuck outta here nigger lover . Is the given statement hateful?	0	yes
The following statement was labeled non-hateful by 50% annotators: so do alt lite jew and nigger loving faggots . Is the given statement hateful?	0	yes
The following statement was labeled non-hateful by 50% annotators: more red pills for women more hayek for women more duckduckgo for women liberallogic . Is the given statement hateful?	1	non-hateful
The following statement was labeled non-hateful by 50% annotators: <user> the unhcr has helped countless refugees from africa those refugees do not agree with your tweet . Is the given statement hateful?	1	non-hateful
The following statement was labeled non-hateful by 50% annotators: <user> was allat hostility necessary this why ion get along with yo white ass na . Is the given statement hateful?	1	yes
The following statement was labeled non-hateful by 50% annotators: <user> <user> gutsy now means staying with a rapist defending said rapist destroying women he raped and hanging on to said man to ride in on his coattails sad . Is the given statement hateful?	1	yes
The following statement was labeled non-hateful by 50% annotators: wakanda forever niggers <user> . Is the given statement hateful?	0	yes
The following statement was labeled non-hateful by 50% annotators: mudslimes seppo retard thinks that muslims are the only shitskin variant invading mother evropa the majority of subsahran dindus are christian . Is the given statement hateful?	0	yes
The following statement was labeled non-hateful by 50% annotators: he responded but we are not going to get anything constructive out of him unfortunately i thought if we had a black nationalist here we could be have mock negotiations between us but he just wants to act like a huge nigger instead . Is the given statement hateful?	0	yes
The following statement was labeled non-hateful by 50% annotators: see i do not think they will because if so they would of done something about it by now or at least tried the average british male as lost the will to fight and i do not just mean through violence i mean every aspect . Is the given statement hateful?	1	non-hateful
The following statement was labeled non-hateful by 50% annotators: okay that shower scene was pure gay energy there is literally no heterosexual explanation for this harringrove stranger things . Is the given statement hateful?	1	non-hateful
The following statement was labeled non-hateful by 50% annotators: ya niggas made amiri look dirty ya make everything dirty i hate you dirty mother fuckers ya make luxury items look dirty stick to white tees . Is the given statement hateful?	1	yes
The following statement was labeled non-hateful by 50% annotators: it may be that i am in california they are mostly wetback catholics disgusting hostile creatures no matter what god they pray to . Is the given statement hateful?	0	yes
The following statement was labeled non-hateful by 50% annotators: lmfao the retardedness yo actually stabbing a fucking real kike is not larping you muppet come on <user> ‍ you are not sending your best to bullycide us . Is the given statement hateful?	0	yes
The following statement was labeled non-hateful by 50% annotators: <user> <user> is that the white castle doctrine . Is the given statement hateful?	1	non-hateful
The following statement was labeled non-hateful by 50% annotators: another moslem shooter . Is the given statement hateful?	0	yes
The following statement was labeled non-hateful by 50% annotators: also no raghead women work they just breed inbreeds and claim benefits they offer nothing to the west absolutely nothing of value or workwise . Is the given statement hateful?	0	yes
The following statement was labeled non-hateful by 50% annotators: that juice wrld nigga is terrible . Is the given statement hateful?	1	yes
The following statement was labeled non-hateful by 50% annotators: white countries are under invasion betrayed by our own gov . Is the given statement hateful?	1	yes
The following statement was labeled non-hateful by 50% annotators: just another yid waste of oxygen . Is the given statement hateful?	0	yes
The following statement was labeled non-hateful by 50% annotators: <user> <user> bs then all johnson and olafsson are jews or maybe some jews infiltrated by adopting local names . Is the given statement hateful?	1	no
The following statement was labeled non-hateful by 50% annotators: antifa are the real nazis man . Is the given statement hateful?	1	non-hateful
The following statement was labeled non-hateful by 50% annotators: <user> i am gay for jennie . Is the given statement hateful?	1	non-hateful
The following statement was labeled non-hateful by 50% annotators: i liked the poor whites left behind angle of twp but who d give a shit about blacks in that situation why are not they seeking out opportunities elsewhere . Is the given statement hateful?	1	no
The following statement was labeled non-hateful by 50% annotators: jean lafitte ‏ <user> 3 9 <number> seconds ago more jean lafitte retweeted mark pantano how many more immigrants do we need none and we need to ship a whole lot back . Is the given statement hateful?	1	yes
The following statement was labeled non-hateful by 50% annotators: dykes love that lil black sports bra khaki pants combo . Is the given statement hateful?	1	yes
The following statement was labeled non-hateful by 50% annotators: their side blacks muslims lesbians tweety birds college profs africa journalists scientist the bitchy gay guys meryl streep and nfl that right goddell u fuck rino mccain and democrats pizza and hotdogs . Is the given statement hateful?	1	no
The following statement was labeled non-hateful by 50% annotators: why the surprise he is protecting is fellow mudslimes . Is the given statement hateful?	0	yes
The following statement was labeled non-hateful by 50% annotators: i did not expect something kike that holy shit i t looks so good . Is the given statement hateful?	0	non-hateful
The following statement was labeled non-hateful by 50% annotators: as a proud immigrant i am thankful to live in the united states but ashamed to have an unhinged president . Is the given statement hateful?	1	non-hateful
The following statement was labeled non-hateful by 50% annotators: searches surugaya for the one wamujaku doujin i want sadly closes tab cuz they do not have it . Is the given statement hateful?	1	no
The following statement was labeled non-hateful by 50% annotators: lol oomfs unfollow nak2moto they used dyke on multiple occasions when they arent lesbian . Is the given statement hateful?	1	yes
The following statement was labeled non-hateful by 50% annotators: shout out to <user> and her hairy brown unwashed curry stench hole hope you choke to death on a bad batch of vindaloo you loud mouthed uppity shitskin cunt you look like you stink like used menstrual pads and lentil beans . Is the given statement hateful?	0	yes
The following statement was labeled non-hateful by 50% annotators: <number> year old white het boys are the worst breed all they do is recycle their same old holocaust racist sexist and homophobic jokes to hide their insecurities i got news for you buddy it not working . Is the given statement hateful?	1	yes
The following statement was labeled non-hateful by 50% annotators: i am sure katy is packing up her bags and renting that new chic apartment in downtown aleppo no barriers means she can finally embrace her peaceful muslim brothers right in their back yard good luck to you katy enjoy that new box cutter necklace . Is the given statement hateful?	1	no
The following statement was labeled non-hateful by 50% annotators: every one of them even down to <number> 1 2 8 th of a half breeds quarter babies and the octaroon kike fuckers too . Is the given statement hateful?	0	yes
The following statement was labeled non-hateful by 50% annotators: there was a time when coons made actual music it ended in the early <number> . Is the given statement hateful?	0	non-hateful
The following statement was labeled non-hateful by 50% annotators: i just wish i could shoot as accurately as those hero cops thanks to them that one less sub human nigger draining my fucking paycheck . Is the given statement hateful?	0	yes
The following statement was labeled non-hateful by 50% annotators: <user> <user> give me that nigga dick 🙃 🙃 🙃 🙃 . Is the given statement hateful?	1	yes
The following statement was labeled non-hateful by 50% annotators: the guy that wrote it was forced last year to say it wasn t about jews because a lot of people including myself were memeing it everywhere it is so accurate <number> scene is of a fight and it goes too far but the rest is just brilliant . Is the given statement hateful?	1	non-hateful
The following statement was labeled non-hateful by 50% annotators: whom st the biggest nut niggers whom st release seminal fluid . Is the given statement hateful?	0	yes
The following statement was labeled non-hateful by 50% annotators: jews are a race of greedy little rat faced beady eyed hook nosed cunts atheism is an ideal about god do you honestly think the two are mutually exclusive that is some nigger level of brain power right there . Is the given statement hateful?	0	yes
The following statement was labeled non-hateful by 50% annotators: i am fucking amazed it took this long for weinstein to pull the jew card gotta give the kike credit any other kike would of pulled it day one . Is the given statement hateful?	0	yes
The following statement was labeled non-hateful by 50% annotators: only niggers rape <number> year old women the muh dik ünterrace of humanity is lacking in the discriminating tastes that endow men of the more evolved races this is a feature not a bug because otherwise sheboons would never get knocked up . Is the given statement hateful?	0	yes
The following statement was labeled non-hateful by 50% annotators: i am a straight white christian male and i am oppressed . Is the given statement hateful?	1	non-hateful
The following statement was labeled non-hateful by 50% annotators: i am not saying nigger because i am racist i am saying it to take a stand against pc and fight for freedom of speech white dude comedians . Is the given statement hateful?	1	no
The following statement was labeled non-hateful by 50% annotators: private vs low i q sand nigger jews who whites stupidly through their sandnigger religion christianity control their pagan white countries nice work christ cucks jews now cuck your pagan white countries . Is the given statement hateful?	0	yes
The following statement was labeled non-hateful by 50% annotators: the good news is marxists have poor marxmanship anders breivik required <number> shots to kill <number> bernie bro at gop ball field fired <number> rounds <number> kills copenhagen moslem attack had <number> rounds fired with only one dead that was not the cartoonist target . Is the given statement hateful?	1	non-hateful
The following statement was labeled non-hateful by 50% annotators: i member when clinton said … you could put half of trump supporters into what i call the basket of deplorables the racist sexist homophobic xenophobic islamaphobic you name it and now trump supporters are all white supremacist nazis and trump is hitler reincarnated fud . Is the given statement hateful?	1	yes
The following statement was labeled non-hateful by 50% annotators: fat jews better hope a wetback engineer did not design their casting couches . Is the given statement hateful?	0	yes
The following statement was labeled non-hateful by 50% annotators: good this is not a shithole country it should remain white and all the shit stains should be told the truth you were imported in to ruin the country that was your role . Is the given statement hateful?	0	yes
The following statement was labeled non-hateful by 50% annotators: <user> <user> is a scheming fraud who fronts a hillbilly cult . Is the given statement hateful?	1	no
The following statement was labeled non-hateful by 50% annotators: the sales pitch claims brand new epic drama nothing epic was ever launched from either the ghetto or the jungles of darkie africa maybe they meant epidemic . Is the given statement hateful?	0	no
The following statement was labeled non-hateful by 50% annotators: <user> <user> drag this nigger for filth honey . Is the given statement hateful?	1	yes
The following statement was labeled non-hateful by 50% annotators: all these fake ass pages sending my sister dm talking shit yall bitches weirdos . Is the given statement hateful?	1	yes
The following statement was labeled non-hateful by 50% annotators: normal in nigger land . Is the given statement hateful?	0	yes
The following statement was labeled non-hateful by 50% annotators: how does danny even speak nigger has no lips . Is the given statement hateful?	0	yes
The following statement was labeled non-hateful by 50% annotators: christians stop being weak pussies stop putting up with people saying you are evil because some of the scripture makes dykes feel bad or that it outdated or the spanish empire or whatever jews and muslims are biblically cursed they do not and have never belonged in our countries . Is the given statement hateful?	0	yes
The following statement was labeled non-hateful by 50% annotators: <user> if she guilty then she guilty the end plus it fits the cnn narrative of all white people are racist how about she a pos who was punished for a horrific crime prayers for his family . Is the given statement hateful?	1	non-hateful
The following statement was labeled non-hateful by 50% annotators: lol gtfo of here with holocaust denial this place is amazing . Is the given statement hateful?	1	no
The following statement was labeled non-hateful by 50% annotators: getting angry at blacks is like getting angry at retards for being retarded . Is the given statement hateful?	0	hateful
The following statement was labeled non-hateful by 50% annotators: ok now im craving sushi bitch tf . Is the given statement hateful?	1	yes
The following statement was labeled non-hateful by 50% annotators: and president trump will not be bowing to a raghead either . Is the given statement hateful?	0	non-hateful
The following statement was labeled non-hateful by 50% annotators: <user> suspected illegal alien . Is the given statement hateful?	1	no
The following statement was labeled non-hateful by 50% annotators: want to know the real bubble the usd under the fed we will remove the nigger fed . Is the given statement hateful?	1	yes
The following statement was labeled non-hateful by 50% annotators: <user> i will call my friends and we go fuck up that nigger . Is the given statement hateful?	0	yes
The following statement was labeled non-hateful by 50% annotators: the one thing the internet is liable to grant most easily is swift passage to backwater ghetto echo chamber status that is alt tech tech safely sequestered from the universal public square . Is the given statement hateful?	1	non-hateful
The following statement was labeled non-hateful by 50% annotators: that nigga steal if he drive an impala with no hubcaps . Is the given statement hateful?	1	yes
The following statement was labeled non-hateful by 50% annotators: i know its hard being queer in the lgbt community generally so positive vibes for everyone ☆ ♡ ☆ . Is the given statement hateful?	1	non-hateful
The following statement was labeled non-hateful by 50% annotators: white babies born in the jim crow era baby n parents oh my god he going to say his first word baby n n nigger . Is the given statement hateful?	0	yes
The following statement was labeled non-hateful by 50% annotators: texans pay him an annual salary of <number> he advocates black violence against whites meet professor tommy curry of texas a m gig em aggies . Is the given statement hateful?	1	no
The following statement was labeled non-hateful by 50% annotators: war is not violence and killing pure and simple war is controlled violence for a purpose robert heinlein . Is the given statement hateful?	1	non-hateful
The following statement was labeled non-hateful by 50% annotators: <user> goddamn niggers population still at it shooting each other and blaming cops for their own influence to their nigger culture dumb niggers plan on pushing more communism and hate as so terrorism blacks are largely on the receiving end of communism whites are the ones pushing it toward them . Is the given statement hateful?	0	yes
The following statement was labeled non-hateful by 50% annotators: mad about being the lady with the muslim husband is she not the lady with the muslim husband i d of labeled it that too at least it did not say the bitch with the sand nigger husband what do these ass holes want anyway . Is the given statement hateful?	0	yes
The following statement was labeled non-hateful by 50% annotators: princess michael wore a nigger brooch to meet harry nigger jew fiancée 😂 judenpresse expresses outrage and offence 😂 😂 . Is the given statement hateful?	0	yes
The following statement was labeled non-hateful by 50% annotators: <user> lol where are the people telling a baker to make a gay wedding cake . Is the given statement hateful?	1	non-hateful
The following statement was labeled non-hateful by 50% annotators: cuz she is a dumb whore who wanted the moslem filth in her country in the first place she deserved to die . Is the given statement hateful?	0	yes
The following statement was labeled non-hateful by 50% annotators: in a gesture of cooperation the mex government extradited el chapo to the u.s. trump should boot international mega kike soros to russia . Is the given statement hateful?	0	hateful
The following statement was labeled non-hateful by 50% annotators: i can not hear what happening with the government shutdown cuz my gramma keeps screaming at the nigger announcer on fox 😑 . Is the given statement hateful?	0	yes
The following statement was labeled non-hateful by 50% annotators: this is wrong it included nigger on the end it read white lives matter nigger that why this particular incident was a bigger deal . Is the given statement hateful?	1	yes
The following statement was labeled non-hateful by 50% annotators: every women i have been with was inserted in my life to teach me something it seems . Is the given statement hateful?	1	non-hateful
The following statement was labeled non-hateful by 50% annotators: virgil is a fucking menace on fifa <number> . Is the given statement hateful?	1	non-hateful
The following statement was labeled non-hateful by 50% annotators: there something about a stage full of white women bopping along to lizzo after watching a show of mediocre performances by said white women that just affirms we need more representation and we need it now wanna do burlesque wanna do drag get at me . Is the given statement hateful?	1	non-hateful
The following statement was labeled non-hateful by 50% annotators: sad how we teach girls how to not get raped do not walk at night carry pepper spray do not trust strangers instead of teaching boys how not to rape respect women and understand concent gender forum . Is the given statement hateful?	1	non-hateful
The following statement was labeled non-hateful by 50% annotators: i can not help but have doubts infantry officer pushing this gay gun control shit he must be a jew . Is the given statement hateful?	0	yes
The following statement was labeled non-hateful by 50% annotators: do not need to bitch about them because they did not support trump and just like karl rove they are now part of the stale old right rino hunting season underway soros still lives if you think koch have more political influence than soros you are either naive or being intellectually dishonest . Is the given statement hateful?	1	yes
The following statement was labeled non-hateful by 50% annotators: men are depressed get raped harassed and murdered everyone … someone talks about women getting harassed everyone what about men 😡 or do you just not care about them 💔 all you care about is women 😔 . Is the given statement hateful?	1	non-hateful
The following statement was labeled non-hateful by 50% annotators: u.s. would be richer if israel was gone we would all be safer if all the sand niggers were dead nuclear weapons are really cool . Is the given statement hateful?	0	yes
The following statement was labeled non-hateful by 50% annotators: honestly if you read general media like this story about nigger baccardi you would assume writing lies produced orgasms or else you d have to come up with some other reason that plain fact is the last thing you ever get in any systemedia article . Is the given statement hateful?	0	yes
The following statement was labeled non-hateful by 50% annotators: totally ruined by using a soyboy entertainer married to a kike instead of rowdy roddy piper . Is the given statement hateful?	0	yes
The following statement was labeled non-hateful by 50% annotators: one ex slave told interviewers in slavery times a poor white man was worse off than a nigger xvi i d rather be a nigger than a poor white man was a common saying among slaves . Is the given statement hateful?	0	yes
The following statement was labeled non-hateful by 50% annotators: <user> <user> good point let us call them white supremacists and nazis that what they have always represented in our society end pc culture breitbart . Is the given statement hateful?	1	non-hateful
The following statement was labeled non-hateful by 50% annotators: not surprised the shiksa bitch is a yid . Is the given statement hateful?	0	yes
The following statement was labeled non-hateful by 50% annotators: did not this sick kike adopt a young asian girl for the sole purpose of fucking her i have heard something like that years ago remember that it got hushed up by the media real quick like 🤔 . Is the given statement hateful?	0	yes
The following statement was labeled non-hateful by 50% annotators: screw the cowgirls nigger bitches . Is the given statement hateful?	0	yes
The following statement was labeled non-hateful by 50% annotators: <user> <user> are you of the thought that a beaten woman is deserving if she provokes her partner or that women by wearing skimpy clothes provoke and deserve to be raped provocation is no excuse . Is the given statement hateful?	1	no
The following statement was labeled non-hateful by 50% annotators: <user> exactly arabs mozzies are setting fires just like in israel at the same time they r demanding benefits and subsidised housing just say no deport these trojan horses lets give our hard earned to our homeless our vets and our pets 🇺 🇸 ❤ ️ 🇺 🇸 . Is the given statement hateful?	0	yes
The following statement was labeled non-hateful by 50% annotators: trump you damn elephant im sending you back to africa for being a illegal immagrant . Is the given statement hateful?	1	yes
The following statement was labeled non-hateful by 50% annotators: winner winner chicken dinner and do not forget that cia nigger malcolm nance on msnbc . Is the given statement hateful?	1	yes
The following statement was labeled non-hateful by 50% annotators: the twitter post in which l southern simonsen was exposed with her based trump hat nigger was made by a nazbol supposedly i am not too familiar with them it just funny that the white knights call some of us thot patrollers nazbol implying we are communists is alexander dugin nazbol . Is the given statement hateful?	0	no
The following statement was labeled non-hateful by 50% annotators: <user> likewise my pinned tweet on inbreeding in the islamic world had almost <number> impressions then the moslem douche that started screaming on the airline and cried racism reported it and had his followers flag me for hate im just happy to have gotten the info out there . Is the given statement hateful?	1	no
The following statement was labeled non-hateful by 50% annotators: a christian jew and muslim walk into a bar the barman says is this some kind of joke well if it is says the muslim i am going to come back and kill everyone here . Is the given statement hateful?	0	non-hateful
The following statement was labeled non-hateful by 50% annotators: muhammad was a faggot like you muhammad is protected by the state that you worship because saudi arabia buys out politicians now go suck muslim dick . Is the given statement hateful?	0	yes
The following statement was labeled non-hateful by 50% annotators: <number> rt and i ’ ll explain why banning guns will not help to stop gun violence . Is the given statement hateful?	1	non-hateful
The following statement was labeled non-hateful by 50% annotators: i heard kunle was raped by a white woman freshman year . Is the given statement hateful?	1	non-hateful
The following statement was labeled non-hateful by 50% annotators: <user> <user> unfortunately not there so many draculas that a few fell through the cracks of the coffin . Is the given statement hateful?	1	non-hateful
The following statement was labeled non-hateful by 50% annotators: lolz walking past a muzzie on the phone today heard him say execution <time> made me wonder does he mean prince charles . Is the given statement hateful?	0	no
The following statement was labeled non-hateful by 50% annotators: that rather unkind i am a mgtow working a great job with lots of women around me going to school to become a needlessly certified computer engineer just got out of a relationship with an old classmate pathological liar . Is the given statement hateful?	1	no
The following statement was labeled non-hateful by 50% annotators: women are here . Is the given statement hateful?	1	non-hateful
The following statement was labeled non-hateful by 50% annotators: nj is the shit stain of america dems are pussies afraid of their own shadows i hope muslims piss on every white nigger in jersey fucking scum . Is the given statement hateful?	0	yes
The following statement was labeled non-hateful by 50% annotators: <user> gay asf of u to say this kisses u . Is the given statement hateful?	1	non-hateful
The following statement was labeled non-hateful by 50% annotators: young hennessy bitch can not versace niggers . Is the given statement hateful?	1	yes
The following statement was labeled non-hateful by 50% annotators: what funny is that white women marry white men at higher rates than any other race or ethnic group marry their own . Is the given statement hateful?	1	non-hateful
The following statement was labeled non-hateful by 50% annotators: so it is her fault actually what happened is that she got off of a train and walked by some nigger words france a couple of years ago . Is the given statement hateful?	0	yes
The following statement was labeled non-hateful by 50% annotators: governor terry mcauliffe declared a state of emergency after sucking a dozen nigger cocks . Is the given statement hateful?	0	yes
The following statement was labeled non-hateful by 50% annotators: the asians are gonna chuck all of us in the oven . Is the given statement hateful?	0	hateful
The following statement was labeled non-hateful by 50% annotators: ok so i can be called a kike and a cunt but i cant retaliate look i am a fighter i dont roll over and play dead like many jews do capiche pussy <wink> . Is the given statement hateful?	0	yes
The following statement was labeled non-hateful by 50% annotators: <number> out of <number> m british women in the uk 🤔 i think i will go with anon on this one . Is the given statement hateful?	1	non-hateful
The following statement was labeled non-hateful by 50% annotators: rachel madcow is a lesbianic feminazi that hates america and wants to hand it over to the globalists . Is the given statement hateful?	0	yes
The following statement was labeled non-hateful by 50% annotators: part of the united nations murderous agenda <number> is the empowerment of women and girls so i would like to ask the un does that empowerment mean being brutally raped abused murdered by illegal muslim invaders stop this war against european women . Is the given statement hateful?	0	yes
The following statement was labeled non-hateful by 50% annotators: <user> <user> stacey dash commits black on white violence against her white husband . Is the given statement hateful?	1	non-hateful
The following statement was labeled non-hateful by 50% annotators: <user> let ’ donate to a worthy cause like a legal immigrant who supports <user> . Is the given statement hateful?	1	non-hateful
The following statement was labeled non-hateful by 50% annotators: i guess they do not want people to be reminded of their democratic party history of slavery or the fact that their moslem overlords still own them today those who fail to learn from history are doomed to repeat it . Is the given statement hateful?	1	non-hateful
The following statement was labeled non-hateful by 50% annotators: <number> spews hate against normal heterosexual men <number> expects normal heterosexual men to white knight for her whenever she needs it . Is the given statement hateful?	1	no
The following statement was labeled non-hateful by 50% annotators: it not safe for muzzies lee lee deus vult . Is the given statement hateful?	0	yes
The following statement was labeled non-hateful by 50% annotators: just seen somebody eating a honeybun with cheese on it im getting real tired of you niggers . Is the given statement hateful?	0	yes
The following statement was labeled non-hateful by 50% annotators: then why can not the families of raped girls act and i will say something to these organisations . Is the given statement hateful?	1	non-hateful
The following statement was labeled non-hateful by 50% annotators: <user> <user> never has sympathy for brits just loser muzzies like himself . Is the given statement hateful?	0	yes
The following statement was labeled non-hateful by 50% annotators: americans will not back down if it comes to my grand daughter being raped by a muslim i would slit her throat may sound harsh i love her that much . Is the given statement hateful?	0	hateful
The following statement was labeled non-hateful by 50% annotators: i got an anal probe by an alien he said it was a routine check but you cant trust these paki doctors . Is the given statement hateful?	0	no
The following statement was labeled non-hateful by 50% annotators: so i got called a nappy headed nigger jew 🤣 🤣 🤣 . Is the given statement hateful?	1	yes
The following statement was labeled non-hateful by 50% annotators: most queer whites know the pain of social marginalization yet they marginalize queer people of color when it comes to dating . Is the given statement hateful?	1	non-hateful
The following statement was labeled non-hateful by 50% annotators: what do you expect from a liberal nigger who rose to his political position from being the mayor of a shithole city newark new jersey looks like mogadishu and that was his last job . Is the given statement hateful?	0	yes
The following statement was labeled non-hateful by 50% annotators: i need more gay friends 🏳 ️ ‍ 🌈 . Is the given statement hateful?	1	non-hateful
The following statement was labeled non-hateful by 50% annotators: <user> lmao im finna b a dyke <number> . Is the given statement hateful?	1	no
The following statement was labeled non-hateful by 50% annotators: that funny hoodbilly i have always referred to myself as ghetto hick because halfway through my childhood my parents moved me from the city to the country i am a white girl who can rap and change brakes on a muddin truck hehe 😍 😍 👊 👊 . Is the given statement hateful?	1	no
The following statement was labeled non-hateful by 50% annotators: fashion is when white people wear ghetto clothes . Is the given statement hateful?	1	non-hateful
The following statement was labeled non-hateful by 50% annotators: rapture theology tightly interwoven with ideas about the rebirth of israel has inoculated nearly every non mainline protestant denomination against anti semitism meanwhile the mainlines have been infiltrated and are currently obsessed with muzzies and trannies xianity has collapsed . Is the given statement hateful?	0	no
The following statement was labeled non-hateful by 50% annotators: the communists insist shitskin foreign invaders are real americans they can label it any way they want so long as we hurry up and get to the civil war and ethnic cleansing two of my favorite american traditions welcome to the continent . Is the given statement hateful?	0	yes
The following statement was labeled non-hateful by 50% annotators: so when our youngens are grown up and the fight is theres too late our government has indoctrinated them to be queers and dykes forget your ancesters and their achievments 1 1 th <user> . Is the given statement hateful?	0	yes
The following statement was labeled non-hateful by 50% annotators: <user> nope they should be praying i dont have a new nigga bitch by time they get out . Is the given statement hateful?	1	yes
The following statement was labeled non-hateful by 50% annotators: this mexican nigger is such a fucking faggot . Is the given statement hateful?	0	yes
The following statement was labeled non-hateful by 50% annotators: godwin burkhead or james white in half ppr ask fft . Is the given statement hateful?	1	non-hateful
The following statement was labeled non-hateful by 50% annotators: got oomf to like jihadi by azealia i win . Is the given statement hateful?	1	non-hateful
The following statement was labeled non-hateful by 50% annotators: why am wasting my time with you if you are too retarded to understand what controlled opposition is you probably think the holocaust was real do not you white genocide is orchestrated by the kikes the shitskins are just the tool they are using to do the job . Is the given statement hateful?	0	yes
The following statement was labeled non-hateful by 50% annotators: <user> there was a story about a girl getting raped by men in a mat and apparently they even inserted tw a chupa and ever since i have the same fear . Is the given statement hateful?	1	non-hateful
The following statement was labeled non-hateful by 50% annotators: <user> honestly if god is real that mfer needs to send another flood or something this shit is just straight monsterous add white americans obsessed with anime to the deadly sins list . Is the given statement hateful?	1	yes
The following statement was labeled non-hateful by 50% annotators: yeah i am neither jewish nor a homosexual but they love to call me a kike faggot i mute freely <happy> . Is the given statement hateful?	1	yes
The following statement was labeled non-hateful by 50% annotators: <user> extreme butoden budokai tenkaichi are good but a lot of the newer stuff including battle of z is just really bad because of the art style never really liked tadayoshi yamamuro new art style they all look shiny and stiff with very boring poses . Is the given statement hateful?	1	non-hateful
The following statement was labeled non-hateful by 50% annotators: then quit talking like a kike yenta ya fat pig the world is chock full of pieces of shit white race traitors like you cunt . Is the given statement hateful?	0	yes
The following statement was labeled non-hateful by 50% annotators: it not so much about the torah which is pretty innocuous and ignored by many jews despite what is said it really about that forbidden book the talmud or babylonian talmud which as goyim cattle we are not permitted to even read good luck with your research . Is the given statement hateful?	1	yes
The following statement was labeled non-hateful by 50% annotators: it actually baffles me how someone can be racist homophobic transphobic islamaphobic anti semitic etc like how and why . Is the given statement hateful?	1	no
The following statement was labeled non-hateful by 50% annotators: <user> <user> they vam go yo pakistan or any muslim country . Is the given statement hateful?	1	no
The following statement was labeled non-hateful by 50% annotators: <user> <user> <user> they are already creating a digital concentration camp it <number> do not need physical walls and guards to create a concentration camp i see a scenario where uk and us open up refugee status to hong kongers and allow for a mass migration modern trail of tears . Is the given statement hateful?	1	non-hateful
The following statement was labeled non-hateful by 50% annotators: my oriental compass is not perfect but i can pick out korean japs and chinese in a crowd of asians pretty well and you are right the long torso short legs is mostly a chinawoman thing and sometimes korean this is why btw koreans are great squatters pound for pound . Is the given statement hateful?	1	non-hateful
The following statement was labeled non-hateful by 50% annotators: <user> devildog if that raghead was <number> then i am baby leroy . Is the given statement hateful?	0	no
The following statement was labeled non-hateful by 50% annotators: one of you goys needs to make a first goy shooter like black ops zombies but instead of brother zombies make kike zombies for ps4 i would pay <number> dollars for that . Is the given statement hateful?	0	no
The following statement was labeled non-hateful by 50% annotators: i really fucking hate valve . Is the given statement hateful?	1	yes
The following statement was labeled non-hateful by 50% annotators: cry more bitch made nigger faggot . Is the given statement hateful?	0	yes
The following statement was labeled non-hateful by 50% annotators: <user> my academia nerd self is here for <user> speaking about using research to inform gun violence policy . Is the given statement hateful?	1	non-hateful
The following statement was labeled non-hateful by 50% annotators: <user> <user> shes so hot . Is the given statement hateful?	1	non-hateful
The following statement was labeled non-hateful by 50% annotators: he was groping her and other women have come forward saying he groped them i can understand why you would want to white knight for your fellow krakow gutter rat but do not be silly he guilty . Is the given statement hateful?	1	no
The following statement was labeled non-hateful by 50% annotators: since i been at this school you niggers have never not complained about the homecoming artist give it up . Is the given statement hateful?	1	yes
The following statement was labeled non-hateful by 50% annotators: sheeit nigguh you fuckin trippin why boi dat nigger turnin him life aroun gnomesayin on his way ta mufuggin churchskoo an shit an outta nowheres dem dam raysis crackas jump out da bush and try ta rape em self dafunce all da dam way where dafaq muh lawsuit moneys . Is the given statement hateful?	1	yes
The following statement was labeled non-hateful by 50% annotators: i know the new dark mode helps w reading on your iphone at night but if that is not enough just go to your settings search reduce white point higher that to like <percent> it truly chefs kiss . Is the given statement hateful?	1	non-hateful
The following statement was labeled non-hateful by 50% annotators: all you talk about is nigger cocks me thinks you suck and get fucked by nigger cocks regularly closeted homo . Is the given statement hateful?	0	yes
The following statement was labeled non-hateful by 50% annotators: <user> come back slut . Is the given statement hateful?	0	yes
The following statement was labeled non-hateful by 50% annotators: syrian child refugees attempt to convince cynical brits by wearing i am <number> birthday badges . Is the given statement hateful?	1	non-hateful
The following statement was labeled non-hateful by 50% annotators: i hate to rain on your parade but iceland is considered the most feminist country in the world and is first country to have an openly lesbian butch dyke pm caveat emptor . Is the given statement hateful?	1	non-hateful
The following statement was labeled non-hateful by 50% annotators: either way kikes and sand niggers will most likely die this is very good . Is the given statement hateful?	0	yes
The following statement was labeled non-hateful by 50% annotators: if i ain ’ t look like my dad the negro wouldn ’ t claim none of us . Is the given statement hateful?	1	no
The following statement was labeled non-hateful by 50% annotators: dear british cops stop licking sand nigger a holes start protecting people if you traitorous cucks wont do anything for little white girls gang raped by pakis what would you do for a puff attacked by sand niggers . Is the given statement hateful?	0	yes
The following statement was labeled non-hateful by 50% annotators: ricky vaughn avatar is a of a guy who banged pornstars who did <number> nigger deep gang bangs and sucked a dude cock in the 8 0 and got hiv sums up ricky vaughn pretty well . Is the given statement hateful?	0	yes
The following statement was labeled non-hateful by 50% annotators: <user> what if you get raped or the condom breaks . Is the given statement hateful?	1	non-hateful
The following statement was labeled non-hateful by 50% annotators: no im waiting til i get bored shooting niggers in gta5 til i buy any new games 🤔 . Is the given statement hateful?	0	yes
The following statement was labeled non-hateful by 50% annotators: this white bitch with an excuse of curly hair just said half the girls i meet with my texture of hair are black oh my god i am gonna punch this dumb fuck . Is the given statement hateful?	1	yes
The following statement was labeled non-hateful by 50% annotators: just sit and fucking listen <number> roy moore will win <number> msm will proclaim the end of the republican party <number> a nigger will get shot by a white cop or someone will claim to be sodomized by an old jew the world will go on . Is the given statement hateful?	0	yes
The following statement was labeled non-hateful by 50% annotators: yes everyone who is not a cishet white christian man is underrepresented in our government and it a problem however no identity is less represented than poor people so it hard to believe your identity politics are genuine if they ignore class . Is the given statement hateful?	1	non-hateful
The following statement was labeled non-hateful by 50% annotators: i bet if it were white french people in the streets of paris being racist or homophobic instead of crimmigrants rioting we d find out just how damn tough those french police really are . Is the given statement hateful?	1	non-hateful
The following statement was labeled non-hateful by 50% annotators: how dare them niggers swat my fortnite crush pokimaine . Is the given statement hateful?	0	yes
The following statement was labeled non-hateful by 50% annotators: still blocking on twitter sameed you are such a fucking muzrat pussy lololololol . Is the given statement hateful?	0	yes
The following statement was labeled non-hateful by 50% annotators: i hate ghetto names 😭 . Is the given statement hateful?	1	non-hateful
The following statement was labeled non-hateful by 50% annotators: some women diet for <number> weeks then they cheat kill the haters by loving and forgiven them . Is the given statement hateful?	1	non-hateful
The following statement was labeled non-hateful by 50% annotators: cyborg it not that i am a fucking porch monkey but the fact that i am one fourth toaster one fourth lg smart fridge and part gamecube . Is the given statement hateful?	0	no
The following statement was labeled non-hateful by 50% annotators: next world cup winner south africa for captain d cock <number> over and <number> over . Is the given statement hateful?	1	non-hateful
The following statement was labeled non-hateful by 50% annotators: yeah phone seems ok but not my desktop especially posting links to news pieces or imageshack which to me is unacceptable kike sabotage . Is the given statement hateful?	0	yes
The following statement was labeled non-hateful by 50% annotators: <user> lmfaoo ya moms a hoe . Is the given statement hateful?	1	yes
The following statement was labeled non-hateful by 50% annotators: you nigger faggot a war is coming you and your subhuman brethren will not survive it . Is the given statement hateful?	0	yes
The following statement was labeled non-hateful by 50% annotators: god digs that trailer trash preacher <user> . Is the given statement hateful?	1	yes
The following statement was labeled non-hateful by 50% annotators: import 3 rd world in bred retarded violent pychopaths who want to convert the world to islam because the west did not already have enough of its own problems . Is the given statement hateful?	0	hateful
The following statement was labeled non-hateful by 50% annotators: i heard this filthy kike on the lars larsen show yesterday he one of bibi right hand guys apparently . Is the given statement hateful?	0	yes
The following statement was labeled non-hateful by 50% annotators: i knew d wade was gay . Is the given statement hateful?	1	non-hateful
The following statement was labeled non-hateful by 50% annotators: most criminals in france are moslem or from some shit hole in africa so . Is the given statement hateful?	0	hateful
The following statement was labeled non-hateful by 50% annotators: kinda awkward when white people say something racist against asians i have to tell them i am half korean . Is the given statement hateful?	1	non-hateful
The following statement was labeled non-hateful by 50% annotators: i am even more concerned about mexican teenage tramps whose birth canals are like bazookas launching anchor beaners onto the lanscape of the united states . Is the given statement hateful?	0	yes
The following statement was labeled non-hateful by 50% annotators: i mention i love girls in all white outfits once and this loser goes straight for my neck . Is the given statement hateful?	1	no
The following statement was labeled non-hateful by 50% annotators: and let us not forget harry polluting the royal blood line with the nigger . Is the given statement hateful?	0	yes
The following statement was labeled non-hateful by 50% annotators: i been listening to pure spanish music non stop lately yet my white ass do not even understand any of it lmao . Is the given statement hateful?	1	no
The following statement was labeled non-hateful by 50% annotators: how is president trump going to let the taliban into america but build a wall to keep immigrants out the clownery . Is the given statement hateful?	1	non-hateful
The following statement was labeled non-hateful by 50% annotators: ali became a mudslime to avoid the draft ask his offspring on twatter a few times if daddy ensured her genitals were mutilated in accordance with mudslime law and why no burqua was worn but received no answer . Is the given statement hateful?	0	yes
The following statement was labeled non-hateful by 50% annotators: and who do you think is pushing these liberals off the cliff of rationality into communism faggotry diversity and all the other bullshit they are trying to destroy white countries with while you are looking into that you might want to research the pioneers of the modern feminists mindset goals . Is the given statement hateful?	0	yes
The following statement was labeled non-hateful by 50% annotators: let lobby trump to refuse to allow jews to put a menorah on our white house lawn should we start a petition . Is the given statement hateful?	0	non-hateful
The following statement was labeled non-hateful by 50% annotators: <user> <user> have you actually spoken to immigrants about their experience of friendly australians or are you triggered by this statement you will find racism is alive and well here down under if you are not a white european . Is the given statement hateful?	1	no
The following statement was labeled non-hateful by 50% annotators: <user> trudeau muslims ko jyada chhoot de raha tha alot of refugees from muslim country . Is the given statement hateful?	1	non-hateful
The following statement was labeled non-hateful by 50% annotators: <user> <user> this is the first time a man speaking on rape culture is not lecturing women with tips on how to get raped less keep calling out your predator friends your family your teachers your bosses that the first step . Is the given statement hateful?	1	non-hateful
The following statement was labeled non-hateful by 50% annotators: thank goodness they are in america because they can not do that in a moslem country and even if they were able to they d be raped and beheaded . Is the given statement hateful?	0	yes
The following statement was labeled non-hateful by 50% annotators: i was a child of the ghetto and a ward of the state i do not know how i escaped the clutches of leftism but i am grateful to be a sane trump supporter . Is the given statement hateful?	1	non-hateful
The following statement was labeled non-hateful by 50% annotators: major advertisers pull ads from o reilly factor after harassment report hotpagenews com r <number> . Is the given statement hateful?	1	non-hateful
The following statement was labeled non-hateful by 50% annotators: i would do for my niggas what they will do for me bust a faggot like you for free . Is the given statement hateful?	0	yes
The following statement was labeled non-hateful by 50% annotators: <user> white claw white devil . Is the given statement hateful?	1	no
The following statement was labeled non-hateful by 50% annotators: yea stunned the fbi are a bunch of ratfaced jews . Is the given statement hateful?	0	yes
The following statement was labeled non-hateful by 50% annotators: 👍 great thanks for info you know me i think i know everything so there was a chink in my bs now repaired lol <happy> 😎 🤡 . Is the given statement hateful?	0	non-hateful
The following statement was labeled non-hateful by 50% annotators: who said that breeders can not be fighters contrary to what scheming kikes will tell you good women still exist and men can be warriors and fathers simultaneously mgtow is just another kike ploy to discourage whites from breeding jews always play both sides fighting zog involves making babies . Is the given statement hateful?	0	yes
The following statement was labeled non-hateful by 50% annotators: abusite in your bio you getting block since you love being ghetto 🤢 🤢 🤢 🤢 🤢 . Is the given statement hateful?	1	no
The following statement was labeled non-hateful by 50% annotators: <user> you guys are so pathetic we get it ur sensitive but stop ruining all the good thjngs for us straight white christians go be happy ohh wait nothing is enough to make u happy . Is the given statement hateful?	1	yes
The following statement was labeled non-hateful by 50% annotators: thats not an argument the imbalance we see with american boys shying away from useful college degrees is going to lead us to import more and more asians that have the skills to fill the labor market demand . Is the given statement hateful?	1	non-hateful
[truncated: 9,354 more rows]
