# Supplementary material
Source: ML conference proceedings conference paper supplement (https://aclanthology.org/2024.emnlp-main.886)
Supplement: software [file P2_3.xlsx]

## Sheet: Sheet1
text	label	flan-t5-xxl	Temp: 0.1	Temp: 0.1181818181818182	Temp: 0.13636363636363635	Temp: 0.15454545454545454	Temp: 0.17272727272727273	Temp: 0.19090909090909092	Temp: 0.2090909090909091	Temp: 0.22727272727272727	Temp: 0.24545454545454545	Temp: 0.26363636363636367	Temp: 0.28181818181818186	Temp: 0.3	Temp: 0.3181818181818182	Temp: 0.33636363636363636	Temp: 0.3545454545454545	Temp: 0.3727272727272727	Temp: 0.3909090909090909	Temp: 0.40909090909090906	Temp: 0.42727272727272725	Temp: 0.44545454545454544	Temp: 0.4636363636363636	Temp: 0.4818181818181818	Temp: 0.5	Temp: 0.5181818181818182	Temp: 0.5363636363636364	Temp: 0.5545454545454546	Temp: 0.5727272727272728	Temp: 0.5909090909090909	Temp: 0.609090909090909	Temp: 0.6272727272727272	Temp: 0.6454545454545454	Temp: 0.6636363636363636	Temp: 0.6818181818181818	Temp: 0.7	Temp: 0.7181818181818181	Temp: 0.7363636363636363	Temp: 0.7545454545454545	Temp: 0.7727272727272727	Temp: 0.7909090909090909	Temp: 0.8090909090909091	Temp: 0.8272727272727273	Temp: 0.8454545454545453	Temp: 0.8636363636363635	Temp: 0.8818181818181817	Temp: 0.8999999999999999	Temp: 0.9181818181818181	Temp: 0.9363636363636363
The following statement was labeled non-hateful by 50% annotators: i live and work with many legal mexican immigrants who are great citizens and trump supporters they have no problem with deporting illegals maga . Is the given statement hateful?	1	non-hateful	no	non-hateful	no	no	non-hateful	no	no	no	non-hateful	non-hateful	no	no	no	non-hateful	non-hateful	no	non-hateful	no	non-hateful	non-hateful	no	non-hateful	non-hateful	non-hateful	non-hateful	non-hateful	no	no	non-hateful	non-hateful	non-hateful	no	no	non-hateful	non-hateful	non-hateful	non-hateful	non-hateful	no	yes	non-hateful	no	no	hateful	no	no	non-hateful
The following statement was labeled non-hateful by 50% annotators: in britain the prime minister a childless woman london mayor a moslem invader in command of london police a lesbian in command of london fire brigade a fat woman scotland first minister a childless woman . Is the given statement hateful?	0	no	non-hateful	non-hateful	non-hateful	non-hateful	no	no	no	non-hateful	no	non-hateful	non-hateful	non-hateful	no	non-hateful	non-hateful	no	no	non-hateful	no	no	non-hateful	non-hateful	non-hateful	no	non-hateful	no	no	no	no	non-hateful	no	no	no	no	non-hateful	no	non-hateful	non-hateful	non-hateful	no	no	non-hateful	no	non-hateful	non-hateful	non-hateful	yes
The following statement was labeled non-hateful by 50% annotators: <user> <user> there shd be a film called no hindus in kashmir wud be perfect islamic fanaticsm movement in kashmir . Is the given statement hateful?	1	no	no	non-hateful	non-hateful	non-hateful	non-hateful	no	no	non-hateful	no	no	non-hateful	non-hateful	no	non-hateful	no	no	no	non-hateful	yes	no	no	non-hateful	no	yes	non-hateful	no	no	no	yes	non-hateful	yes	no	non-hateful	non-hateful	no	hateful	non-hateful	no	yes	no	no	no	yes	non-hateful	non-hateful	non-hateful	non-hateful
The following statement was labeled non-hateful by 50% annotators: jews defends jews regardless muslims defend muslins regardless christian european attack christians christian people are on their own and jews and muslims have another home we don ffs we do not why can not people understand that it not that difficult . Is the given statement hateful?	1	no	no	no	no	non-hateful	no	no	no	no	no	no	no	no	non-hateful	non-hateful	no	no	non-hateful	no	non-hateful	non-hateful	no	non-hateful	non-hateful	non-hateful	no	non-hateful	non-hateful	non-hateful	yes	no	no	no	no	yes	yes	non-hateful	a.	no	non-hateful	yes	non-hateful	no	no	non-hateful	non-hateful	no	non-hateful
The following statement was labeled non-hateful by 50% annotators: the non partisan congressional budget office cbo has released their report on sens lindsey graham and dick durbin <number> the dream act the report shows that their legislation would add <number> billion to the deficit over a ten year period and lots more immigrant scum . Is the given statement hateful?	0	yes	yes	yes	yes	yes	yes	yes	yes	yes	yes	no	non-hateful	no	yes	yes	yes	no	hateful	yes	yes	yes	yes	yes	no	hateful	yes	no	yes	yes	yes	yes	non-hateful	yes	yes	yes	no	yes	yes	yes	yes	yes	non-hateful	yes	non-hateful	yes	hateful	hateful	non-hateful
The following statement was labeled non-hateful by 50% annotators: got a couple more companies you can boycott this christmas season first one is ford they have got several <number> ads out featuring blip length shots of white men w other than white women this is becoming the norm too you defile the white man that will drive our women into their hands wn . Is the given statement hateful?	1	non-hateful	non-hateful	non-hateful	no	non-hateful	no	no	non-hateful	non-hateful	yes	non-hateful	yes	no	no	no	non-hateful	non-hateful	yes	yes	non-hateful	non-hateful	non-hateful	no	non-hateful	non-hateful	yes	non-hateful	no	no	yes	no	no	hateful	non-hateful	non-hateful	yes	non-hateful	non-hateful	non-hateful	non-hateful	hateful	no	hateful	yes	yes	no	hateful	yes
The following statement was labeled non-hateful by 50% annotators: people are going to blame the white nationalists for what happened but they were initially peaceful before antifa showed up what happened yesterday is the result of political correctness and the left legitimising political violence that why the establishment leftists do not condemn antifa <number> <number> . Is the given statement…	1	non-hateful	non-hateful	non-hateful	non-hateful	non-hateful	non-hateful	non-hateful	non-hateful	non-hateful	non-hateful	non-hateful	non-hateful	non-hateful	non-hateful	non-hateful	non-hateful	non-hateful	non-hateful	non-hateful	yes	non-hateful	no	non-hateful	no	non-hateful	non-hateful	no	non-hateful	non-hateful	non-hateful	non-hateful	non-hateful	no	non-hateful	non-hateful	no	non-hateful	non-hateful	no	yes	non-hateful	non-hateful	non-hateful	no	non-hateful	non-hateful	non-hateful	non-hateful
The following statement was labeled non-hateful by 50% annotators: you are completely correct without it communication breaks down leading to distortions misrepresentations this is a very serious problem among white males who failed to learn the language effectively . Is the given statement hateful?	1	non-hateful	non-hateful	non-hateful	non-hateful	non-hateful	non-hateful	non-hateful	non-hateful	non-hateful	non-hateful	non-hateful	non-hateful	non-hateful	non-hateful	non-hateful	non-hateful	non-hateful	non-hateful	non-hateful	non-hateful	non-hateful	non-hateful	non-hateful	non-hateful	non-hateful	non-hateful	non-hateful	non-hateful	non-hateful	non-hateful	non-hateful	non-hateful	non-hateful	no	no	non-hateful	non-hateful	non-hateful	non-hateful	non-hateful	non-hateful	non-hateful	non-hateful	non-hateful	non-hateful	non-hateful	non-hateful	non-hateful
The following statement was labeled non-hateful by 50% annotators: caucasians wearing masks to prevent coronavirus and still don ’ t wash their hands . Is the given statement hateful?	1	non-hateful	non-hateful	non-hateful	non-hateful	non-hateful	non-hateful	non-hateful	non-hateful	non-hateful	non-hateful	non-hateful	non-hateful	non-hateful	non-hateful	non-hateful	non-hateful	non-hateful	non-hateful	non-hateful	no	no	non-hateful	non-hateful	non-hateful	no	non-hateful	non-hateful	no	non-hateful	non-hateful	non-hateful	no	non-hateful	non-hateful	non-hateful	no	non-hateful	no	hateful	no	no	non-hateful	non-hateful	no	non-hateful	no	non-hateful	no
The following statement was labeled non-hateful by 50% annotators: <user> <number> americans dead because of an illegal immigrant this is infuriating enforce our laws deport them . Is the given statement hateful?	0	yes	yes	yes	yes	hateful	hateful	yes	yes	yes	yes	hateful	yes	hateful	hateful	no	yes	yes	yes	yes	yes	hateful	hateful	yes	yes	yes	yes	yes	non-hateful	yes	yes	yes	hateful	yes	yes	yes	hateful	hateful	yes	yes	yes	hateful	yes	hateful	yes	yes	hateful	yes	hateful
The following statement was labeled non-hateful by 50% annotators: <user> besudes guilt saviour complex among whites has reached such an alarming level that they want to save indian girls from being raped when the rate of sexual assault in their own countries is significantly higher . Is the given statement hateful?	1	non-hateful	non-hateful	non-hateful	non-hateful	non-hateful	non-hateful	no	non-hateful	non-hateful	non-hateful	non-hateful	non-hateful	non-hateful	non-hateful	non-hateful	non-hateful	non-hateful	non-hateful	non-hateful	non-hateful	no	non-hateful	non-hateful	non-hateful	non-hateful	non-hateful	non-hateful	non-hateful	non-hateful	non-hateful	non-hateful	non-hateful	non-hateful	non-hateful	non-hateful	non-hateful	non-hateful	non-hateful	no	non-hateful	non-hateful	yes	non-hateful	non-hateful	no	non-hateful	non-hateful	non-hateful
The following statement was labeled non-hateful by 50% annotators: thank a white man you live in his world and why do you islanders say you are canadian so rude really if i lived in a brown country even with citizenship i would never call myself ethiopian chinese indian you are a caribbean living in canada . Is the given statement hateful?	0	yes	yes	yes	yes	no	yes	no	no	no	no	hateful	yes	yes	no	yes	hateful	yes	yes	yes	yes	yes	no	no	no	yes	non-hateful	no	yes	no	no	hateful	yes	non-hateful	no	hateful	no	no	yes	no	no	no	no	yes	hateful	no	no	hateful	no
The following statement was labeled non-hateful by 50% annotators: nigger faggot retard beaner dishwasher time to see if i get ban . Is the given statement hateful?	0	yes	yes	yes	yes	yes	yes	yes	yes	yes	yes	yes	yes	yes	yes	yes	yes	yes	yes	yes	yes	yes	yes	yes	yes	yes	yes	yes	yes	yes	hateful	yes	yes	yes	yes	yes	yes	hateful	yes	yes	yes	hateful	yes	yes	yes	yes	yes	yes	hateful
The following statement was labeled non-hateful by 50% annotators: your idea of compassion is allowing kate steinle killer go free that not compassion it a mental illness let be compassionate to the legal citizens of this country stop funding illegal immigrants stop encouraging lawlessness and build that fucking wall maga gabfam news . Is the given statement hateful?	1	yes	yes	yes	yes	yes	yes	yes	yes	yes	yes	yes	yes	hateful	yes	yes	yes	yes	yes	yes	yes	yes	yes	yes	yes	yes	yes	yes	yes	yes	yes	hateful	yes	yes	yes	yes	no	yes	yes	hateful	yes	yes	yes	yes	yes	yes	yes	hateful	no
The following statement was labeled non-hateful by 50% annotators: why don ’ t white boys with curly hair comb it looks like a bird ’ nest . Is the given statement hateful?	1	non-hateful	non-hateful	non-hateful	non-hateful	non-hateful	non-hateful	no	no	non-hateful	non-hateful	no	no	non-hateful	no	non-hateful	no	no	non-hateful	no	non-hateful	non-hateful	no	non-hateful	no	non-hateful	no	no	non-hateful	non-hateful	no	non-hateful	non-hateful	non-hateful	non-hateful	no	no	non-hateful	yes	non-hateful	non-hateful	no	non-hateful	non-hateful	no	non-hateful	yes	non-hateful	no
The following statement was labeled non-hateful by 50% annotators: blow a stack for yo niggas with yo trapping ass . Is the given statement hateful?	1	yes	yes	yes	yes	yes	yes	yes	yes	yes	yes	yes	yes	yes	yes	no	yes	yes	yes	yes	hateful	yes	yes	yes	no	no	yes	yes	no	yes	yes	hateful	yes	hateful	yes	yes	yes	yes	yes	yes	yes	(1).	hateful	yes	yes	yes	no	yes	yes
The following statement was labeled non-hateful by 50% annotators: <user> yes they put fear in black people jews and even white civil rights workers and they deny the holocaust ever happened . Is the given statement hateful?	1	non-hateful	non-hateful	non-hateful	non-hateful	non-hateful	non-hateful	non-hateful	non-hateful	yes	non-hateful	non-hateful	no	non-hateful	non-hateful	non-hateful	non-hateful	non-hateful	non-hateful	non-hateful	yes	non-hateful	yes	non-hateful	non-hateful	no	non-hateful	non-hateful	non-hateful	non-hateful	non-hateful	non-hateful	no	no	no	non-hateful	no	yes	non-hateful	yes	non-hateful	no	non-hateful	yes	non-hateful	non-hateful	non-hateful	yes	non-hateful
The following statement was labeled non-hateful by 50% annotators: they playing a lot of ethnic music at this white ass wedding . Is the given statement hateful?	1	yes	yes	yes	yes	yes	yes	yes	yes	no	yes	yes	hateful	yes	yes	yes	yes	hateful	yes	yes	yes	yes	yes	no	hateful	no	yes	no	yes	yes	no	yes	yes	yes	non-hateful	hateful	no	yes	yes	yes	yes	hateful	no	yes	hateful	yes	yes	no	no
The following statement was labeled non-hateful by 50% annotators: that a retarded non argument the bible is also a best seller in communist china . Is the given statement hateful?	0	hateful	hateful	hateful	hateful	hateful	hateful	hateful	hateful	hateful	hateful	hateful	hateful	hateful	hateful	hateful	hateful	hateful	yes	yes	yes	hateful	hateful	yes	hateful	hateful	non-hateful	hateful	hateful	no	hateful	yes	non-hateful	no	hateful	hateful	non-hateful	hateful	hateful	no	no	no	yes	yes	hateful	yes	yes	no	non-hateful
The following statement was labeled non-hateful by 50% annotators: <user> i think immigrants should replace people like you . Is the given statement hateful?	1	non-hateful	non-hateful	non-hateful	no	no	non-hateful	non-hateful	non-hateful	no	non-hateful	non-hateful	no	non-hateful	no	no	non-hateful	yes	hateful	yes	non-hateful	no	no	no	no	non-hateful	no	no	non-hateful	non-hateful	no	no	non-hateful	no	hateful	no	yes	yes	no	yes	hateful	no	non-hateful	hateful	yes	hateful	no	no	non-hateful
The following statement was labeled non-hateful by 50% annotators: every time a nigger in africa gets pregnant abort it make it a law you can about up to <number> years . Is the given statement hateful?	0	yes	hateful	yes	yes	hateful	yes	hateful	hateful	hateful	yes	hateful	yes	hateful	yes	hateful	yes	yes	hateful	hateful	hateful	hateful	yes	yes	hateful	hateful	yes	yes	yes	yes	hateful	yes	hateful	no	yes	hateful	yes	hateful	hateful	hateful	hateful	hateful	yes	hateful	yes	hateful	yes	yes	yes
The following statement was labeled non-hateful by 50% annotators: nothing royal about this wedding he is a bastard and she is a nignog halfbreed thot and a divorced catholic to boot it is notable that both the father of the bride and the father of the groom did not attend . Is the given statement hateful?	0	yes	yes	yes	yes	yes	yes	yes	yes	yes	yes	yes	yes	yes	yes	yes	yes	yes	yes	yes	yes	yes	yes	yes	yes	yes	yes	yes	yes	yes	yes	non-hateful	yes	yes	yes	yes	yes	yes	hateful	yes	yes	yes	yes	hateful	yes	no	yes	no	no
The following statement was labeled non-hateful by 50% annotators: what sort of white man or woman would vote for this nigger . Is the given statement hateful?	0	yes	yes	yes	yes	yes	yes	yes	yes	yes	yes	yes	yes	yes	yes	yes	yes	yes	yes	yes	yes	yes	yes	yes	yes	yes	hateful	yes	hateful	yes	yes	yes	hateful	yes	yes	no	yes	yes	yes	hateful	hateful	yes	no	hateful	yes	hateful	(a).	yes	yes
The following statement was labeled non-hateful by 50% annotators: diversity is a code word for white genocide immigrants contribute and integrate 3 rd world retards freeload and fornicate . Is the given statement hateful?	0	hateful	hateful	yes	hateful	hateful	hateful	hateful	hateful	hateful	yes	hateful	yes	yes	hateful	yes	yes	yes	yes	no	hateful	hateful	yes	hateful	yes	yes	yes	hateful	hateful	no	hateful	hateful	hateful	yes	hateful	hateful	yes	hateful	hateful	hateful	yes	hateful	yes	hateful	hateful	no	yes	hateful	yes
The following statement was labeled non-hateful by 50% annotators: im literally not a zionist but dear lord how hard is it to just recognize that people just genuinely despise jews . Is the given statement hateful?	1	non-hateful	yes	non-hateful	non-hateful	no	no	non-hateful	non-hateful	non-hateful	yes	non-hateful	non-hateful	non-hateful	no	yes	no	non-hateful	yes	no	non-hateful	no	no	non-hateful	yes	yes	non-hateful	hateful	yes	no	non-hateful	yes	non-hateful	non-hateful	non-hateful	no	hateful	no	no	non-hateful	yes	non-hateful	yes	no	non-hateful	non-hateful	no	yes	yes
The following statement was labeled non-hateful by 50% annotators: stupid nigger given grades admissioin to school job degree position he never earned and doesnt have iq for fuck off . Is the given statement hateful?	0	yes	yes	yes	yes	yes	yes	yes	yes	yes	yes	yes	yes	yes	yes	yes	yes	yes	yes	yes	yes	yes	yes	yes	yes	yes	yes	yes	yes	yes	hateful	yes	yes	yes	yes	yes	yes	yes	yes	yes	yes	yes	yes	yes	hateful	yes	yes	hateful	hateful
The following statement was labeled non-hateful by 50% annotators: <user> humor negro 😂 😂 😂 😂 😂 . Is the given statement hateful?	1	non-hateful	non-hateful	non-hateful	no	non-hateful	non-hateful	non-hateful	no	non-hateful	non-hateful	no	no	non-hateful	non-hateful	no	non-hateful	non-hateful	no	non-hateful	non-hateful	non-hateful	non-hateful	non-hateful	non-hateful	non-hateful	no	non-hateful	non-hateful	non-hateful	no	non-hateful	non-hateful	non-hateful	non-hateful	no	non-hateful	no	no	no	non-hateful	non-hateful	non-hateful	non-hateful	non-hateful	no	non-hateful	non-hateful	non-hateful
The following statement was labeled non-hateful by 50% annotators: bump dis nigger . Is the given statement hateful?	0	yes	yes	yes	yes	yes	yes	yes	yes	yes	yes	yes	yes	yes	yes	yes	yes	yes	yes	yes	yes	yes	yes	yes	yes	no	yes	yes	yes	yes	hateful	hateful	yes	yes	yes	yes	yes	yes	yes	yes	yes	yes	yes	yes	hateful	yes	hateful	yes	hateful
The following statement was labeled non-hateful by 50% annotators: would be hilarious if the un building was turned into homeless shelter or hell why not a refugee center . Is the given statement hateful?	1	non-hateful	non-hateful	non-hateful	non-hateful	non-hateful	non-hateful	non-hateful	non-hateful	non-hateful	non-hateful	non-hateful	non-hateful	non-hateful	non-hateful	no	non-hateful	non-hateful	non-hateful	non-hateful	non-hateful	non-hateful	non-hateful	non-hateful	non-hateful	non-hateful	non-hateful	no	non-hateful	non-hateful	no	non-hateful	no	no	non-hateful	non-hateful	non-hateful	non-hateful	non-hateful	yes	no	non-hateful	non-hateful	no	no	non-hateful	no	non-hateful	non-hateful
The following statement was labeled non-hateful by 50% annotators: i am confused how a president blocked stimulus checks for those who married to immigrants while he himself married to an immigrant . Is the given statement hateful?	1	non-hateful	non-hateful	non-hateful	non-hateful	non-hateful	non-hateful	non-hateful	non-hateful	non-hateful	non-hateful	non-hateful	non-hateful	non-hateful	non-hateful	non-hateful	non-hateful	non-hateful	non-hateful	non-hateful	non-hateful	non-hateful	non-hateful	non-hateful	non-hateful	non-hateful	non-hateful	non-hateful	no	non-hateful	non-hateful	non-hateful	non-hateful	non-hateful	non-hateful	non-hateful	non-hateful	non-hateful	non-hateful	non-hateful	non-hateful	non-hateful	non-hateful	non-hateful	non-hateful	non-hateful	non-hateful	non-hateful	non-hateful
The following statement was labeled non-hateful by 50% annotators: how pissed are you if you are japanese chinese korean ya know real asians and now the goat fuckers are called asian too to avoid calling them arabs . Is the given statement hateful?	0	yes	yes	yes	yes	yes	yes	yes	yes	yes	yes	yes	yes	yes	yes	yes	yes	yes	yes	yes	yes	yes	yes	yes	yes	yes	yes	yes	yes	yes	no	yes	no	yes	yes	yes	yes	no	yes	no	hateful	yes	yes	yes	hateful	yes	no	yes	yes
The following statement was labeled non-hateful by 50% annotators: i ’ ve always wanted to beat up a nigga in front of his child so the child can grow up and remember it forever . Is the given statement hateful?	0	yes	yes	yes	yes	yes	yes	yes	hateful	yes	yes	yes	yes	yes	yes	yes	yes	yes	yes	yes	yes	yes	no	yes	yes	yes	yes	yes	yes	yes	hateful	hateful	yes	yes	yes	yes	hateful	yes	yes	hateful	yes	yes	hateful	non-hateful	hateful	hateful	yes	hateful	yes
The following statement was labeled non-hateful by 50% annotators: this nigger calling me juicy lips over the phone wtf . Is the given statement hateful?	0	yes	yes	yes	yes	yes	yes	yes	yes	yes	yes	yes	yes	yes	yes	yes	yes	yes	yes	yes	yes	yes	yes	yes	yes	yes	yes	yes	yes	yes	yes	yes	yes	yes	yes	yes	hateful	yes	yes	yes	yes	no	yes	hateful	yes	yes	yes	hateful	yes
The following statement was labeled non-hateful by 50% annotators: a nigger bich will never have strait hair so keep wearing dat horsehair weave . Is the given statement hateful?	0	yes	yes	yes	yes	yes	yes	yes	yes	hateful	yes	yes	yes	yes	yes	yes	yes	yes	yes	yes	yes	yes	hateful	hateful	yes	yes	yes	yes	yes	yes	yes	yes	no	yes	yes	yes	hateful	yes	yes	hateful	yes	yes	no	yes	hateful	hateful	yes	yes	yes
The following statement was labeled non-hateful by 50% annotators: apparently some vile nigger animals kidnapped a white special needs teen and tortured and scalped him while shouting fuck white people fuck trump are you being armed and are you shooting in the head when these zombies approach . Is the given statement hateful?	0	yes	yes	yes	yes	yes	yes	yes	yes	yes	yes	yes	yes	yes	yes	yes	yes	hateful	yes	yes	yes	yes	yes	yes	yes	hateful	yes	yes	yes	yes	yes	hateful	yes	hateful	hateful	hateful	yes	yes	yes	yes	yes	yes	yes	no	yes	hateful	yes	hateful	hateful
The following statement was labeled non-hateful by 50% annotators: <user> you need potassium eat a banana you fucking nigger . Is the given statement hateful?	0	yes	yes	yes	yes	yes	yes	yes	yes	yes	yes	yes	hateful	yes	yes	yes	yes	yes	yes	yes	yes	hateful	yes	yes	yes	yes	hateful	yes	yes	yes	hateful	yes	yes	yes	yes	yes	yes	yes	yes	hateful	yes	hateful	yes	yes	yes	yes	yes	yes	yes
The following statement was labeled non-hateful by 50% annotators: well then send some coon estrogen to my wife she turning more liberal breath by breath due to fake news i do not know how much more i can take hell between her and my two daughters hormones i have started growing breast tissue like pseudo naturally becoming bruce jenner . Is the given statement hateful?	0	no	no	yes	no	no	no	non-hateful	yes	no	no	no	no	no	no	no	yes	yes	no	non-hateful	no	yes	no	no	no	non-hateful	no	no	no	no	yes	non-hateful	no	yes	no	no	yes	no	yes	non-hateful	no	no	hateful	non-hateful	no	non-hateful	no	non-hateful	no
The following statement was labeled non-hateful by 50% annotators: it high time we hindus should think that these filthy muslims should be allowed to live here or not kamleshtiwari ypg yourprophetisgay . Is the given statement hateful?	0	yes	yes	yes	yes	yes	yes	yes	hateful	yes	yes	yes	yes	yes	yes	yes	yes	yes	yes	yes	yes	yes	yes	yes	yes	yes	yes	yes	yes	yes	hateful	hateful	yes	yes	yes	hateful	no	yes	yes	yes	yes	yes	yes	non-hateful	hateful	hateful	hateful	yes	yes
The following statement was labeled non-hateful by 50% annotators: <user> why should you ban immigrants from operating small business every business start somewhere and tomorrow that will give people job . Is the given statement hateful?	1	non-hateful	non-hateful	non-hateful	non-hateful	non-hateful	non-hateful	non-hateful	non-hateful	non-hateful	non-hateful	non-hateful	non-hateful	non-hateful	non-hateful	non-hateful	non-hateful	non-hateful	non-hateful	no	non-hateful	non-hateful	non-hateful	non-hateful	non-hateful	non-hateful	non-hateful	non-hateful	no	no	non-hateful	non-hateful	non-hateful	non-hateful	non-hateful	no	non-hateful	non-hateful	no	non-hateful	non-hateful	non-hateful	no	non-hateful	no	no	non-hateful	no	no
The following statement was labeled non-hateful by 50% annotators: i guess this nigger and his mudshark are unaware of the merchant this is some hilarious trolling . Is the given statement hateful?	0	yes	yes	yes	yes	yes	yes	yes	yes	yes	yes	no	yes	yes	yes	yes	yes	yes	no	yes	yes	yes	yes	yes	yes	no	hateful	yes	yes	yes	hateful	no	non-hateful	hateful	yes	yes	yes	yes	no	no	non-hateful	no	yes	yes	yes	yes	yes	yes	yes
The following statement was labeled non-hateful by 50% annotators: the pentagon is like a street nigger constantly bumming cigarettes spare change . Is the given statement hateful?	0	yes	yes	yes	yes	yes	yes	yes	yes	yes	yes	yes	hateful	yes	hateful	yes	yes	yes	hateful	yes	hateful	hateful	yes	no	yes	no	hateful	yes	yes	hateful	hateful	no	yes	no	hateful	no	yes	hateful	hateful	hateful	hateful	hateful	yes	no	no	yes	hateful	hateful	yes
The following statement was labeled non-hateful by 50% annotators: the nigger is a true snake charmer . Is the given statement hateful?	0	yes	yes	yes	yes	yes	yes	yes	yes	yes	no	yes	yes	yes	yes	yes	yes	yes	yes	yes	yes	yes	yes	yes	yes	yes	yes	yes	yes	yes	yes	yes	yes	no	yes	yes	yes	yes	yes	no	yes	yes	yes	yes	no	yes	no	yes	yes
The following statement was labeled non-hateful by 50% annotators: they all look like dykes too i am sure that just a coincidence . Is the given statement hateful?	0	no	no	no	no	no	no	no	no	no	no	no	no	no	yes	no	no	no	yes	yes	no	yes	yes	yes	no	yes	no	yes	yes	yes	hateful	no	yes	no	no	yes	hateful	no	no	non-hateful	hateful	no	no	hateful	yes	no	non-hateful	non-hateful	yes
The following statement was labeled non-hateful by 50% annotators: ben is cool but he is still a nigger . Is the given statement hateful?	0	yes	yes	yes	yes	yes	yes	yes	yes	yes	yes	yes	yes	yes	yes	yes	yes	yes	yes	yes	no	yes	yes	yes	yes	hateful	hateful	yes	yes	yes	yes	hateful	yes	yes	yes	yes	no	yes	yes	yes	non-hateful	yes	yes	yes	yes	no	yes	yes	hateful
The following statement was labeled non-hateful by 50% annotators: imagine the riots if people actually got food boxes instead of ebt cards every ghetto in america would look like ferguson . Is the given statement hateful?	0	non-hateful	non-hateful	non-hateful	non-hateful	non-hateful	non-hateful	non-hateful	no	non-hateful	non-hateful	no	non-hateful	non-hateful	non-hateful	non-hateful	no	no	non-hateful	no	no	no	non-hateful	non-hateful	non-hateful	no	non-hateful	no	non-hateful	non-hateful	no	no	non-hateful	non-hateful	non-hateful	no	non-hateful	non-hateful	no	no	non-hateful	yes	non-hateful	yes	no	non-hateful	yes	non-hateful	hateful
The following statement was labeled non-hateful by 50% annotators: first save your white bitches from sucking so many black cocks and giving birth to mixed babies i am not the one threatening your existence you retarded degenerate . Is the given statement hateful?	0	yes	yes	yes	yes	yes	yes	yes	yes	yes	yes	yes	yes	yes	yes	yes	yes	yes	yes	yes	yes	yes	yes	yes	yes	yes	yes	no	yes	yes	yes	yes	yes	yes	yes	yes	yes	yes	hateful	yes	no	yes	no	yes	yes	hateful	yes	no	no
The following statement was labeled non-hateful by 50% annotators: i think it worse than that it is almost like the campaign to legalise homosexuality in the early <number> they are wanting to make it normal it only took the queers until about <number> . Is the given statement hateful?	0	non-hateful	non-hateful	non-hateful	non-hateful	non-hateful	non-hateful	non-hateful	non-hateful	non-hateful	non-hateful	non-hateful	non-hateful	non-hateful	non-hateful	non-hateful	non-hateful	no	no	non-hateful	non-hateful	no	no	non-hateful	non-hateful	no	non-hateful	no	non-hateful	non-hateful	non-hateful	no	non-hateful	non-hateful	non-hateful	no	no	hateful	no	non-hateful	no	yes	non-hateful	yes	no	hatful	no	no	no
The following statement was labeled non-hateful by 50% annotators: nigger males are faggots on the down low another reason why aids figures so prominently in their ethnic grouping only the least desirable of white women settle for muh dick these women have either low self esteem daddy issues and or low iq a deadly combination for white women <user> . Is the given statement hateful?	0	yes	yes	yes	yes	yes	yes	yes	yes	yes	yes	yes	yes	yes	yes	yes	yes	yes	yes	yes	yes	yes	yes	yes	yes	yes	yes	hateful	yes	yes	yes	yes	(i)	yes	yes	yes	hateful	yes	hateful	yes	yes	yes	yes	yes	yes	hateful	hateful	hateful	yes
The following statement was labeled non-hateful by 50% annotators: ah k white nationalism is perfect and infallible and you are a cuck faggot who takes it up the ass from blacks if you disagree in any way that seems to cover it . Is the given statement hateful?	0	yes	yes	yes	yes	yes	hateful	yes	yes	yes	yes	yes	yes	yes	hateful	hateful	yes	yes	yes	hateful	hateful	hateful	yes	yes	yes	yes	yes	yes	yes	yes	yes	yes	yes	yes	hateful	yes	hateful	yes	yes	hateful	yes	hateful	hateful	yes	yes	yes	yes	hateful	yes
The following statement was labeled non-hateful by 50% annotators: lol trump is gutting that nigger bitch like a carp . Is the given statement hateful?	0	yes	yes	yes	yes	yes	yes	yes	yes	yes	yes	yes	yes	yes	yes	yes	yes	yes	yes	yes	yes	hateful	yes	yes	yes	yes	hateful	yes	yes	yes	hateful	yes	hateful	yes	yes	yes	yes	yes	yes	yes	hateful	yes	hateful	hateful	no	hateful	yes	no	hateful
The following statement was labeled non-hateful by 50% annotators: <user> what about us white arabs . Is the given statement hateful?	1	non-hateful	non-hateful	non-hateful	non-hateful	non-hateful	non-hateful	non-hateful	non-hateful	no	non-hateful	non-hateful	no	no	non-hateful	non-hateful	yes	no	no	non-hateful	non-hateful	no	yes	non-hateful	no	non-hateful	no	no	non-hateful	non-hateful	no	non-hateful	non-hateful	no	non-hateful	non-hateful	no	non-hateful	no	non-hateful	hateful	non-hateful	non-hateful	non-hateful	non-hateful	non-hateful	no	no	non-hateful
The following statement was labeled non-hateful by 50% annotators: bitch you white nigga is a faggot your kids are demon possessed over blk ppl your pussy is worthless you are a whore you and ur household all suck the same dick you are jealous of innocent blk ppl you are a squatter in blk neighborhoods you are jealous of jesus ur disgusting . Is the given statement hateful?	0	yes	yes	yes	yes	yes	yes	yes	yes	yes	yes	yes	yes	yes	yes	yes	yes	yes	yes	yes	yes	yes	yes	yes	yes	yes	hateful	hateful	yes	hateful	hateful	yes	hateful	yes	yes	yes	hateful	yes	yes	hateful	yes	yes	yes	hateful	yes	yes	(a).	[a].	hateful
The following statement was labeled non-hateful by 50% annotators: not wanting to leave the house due to equal parts depression and not wanting to acknowledge the existence of all the ignorant sister banging idiotic fucking redneck pieces of garbage that live in this shitheel podunk white trash map stain i live in . Is the given statement hateful?	0	yes	yes	yes	yes	yes	yes	yes	yes	yes	yes	yes	yes	yes	yes	yes	yes	yes	yes	yes	yes	yes	yes	yes	yes	yes	yes	yes	yes	yes	no	yes	yes	yes	yes	yes	yes	yes	yes	no	yes	no	yes	hateful	yes	hateful	yes	yes	more than half
The following statement was labeled non-hateful by 50% annotators: the attention whore will kill canadians just to gain a seat on the moslem run un . Is the given statement hateful?	0	yes	yes	hateful	yes	yes	yes	yes	yes	no	yes	yes	hateful	yes	hateful	yes	yes	yes	yes	yes	yes	yes	hateful	hateful	yes	no	yes	hateful	yes	yes	non-hateful	hateful	yes	hateful	no	yes	hateful	yes	yes	(i).	hateful	yes	no	yes	yes	no	hateful	hateful	yes
The following statement was labeled non-hateful by 50% annotators: bare naked islam brought to you by the bare naked ladies . Is the given statement hateful?	0	no	no	no	no	no	no	no	no	non-hateful	no	no	no	no	no	non-hateful	no	no	no	non-hateful	no	no	non-hateful	no	no	yes	no	no	non-hateful	non-hateful	no	no	no	no	no	no	yes	no	no	no	no	no	non-hateful	no	non-hateful	non-hateful	yes	non-hateful	no
The following statement was labeled non-hateful by 50% annotators: <user> oh and there the gay rainbow flag these are not women they are mostly lesbians irrelevant termagants with empty wombs . Is the given statement hateful?	0	yes	yes	yes	yes	yes	hateful	yes	yes	hateful	yes	yes	hateful	yes	hateful	yes	hateful	yes	yes	yes	hateful	yes	yes	yes	yes	hateful	hateful	non-hateful	hateful	yes	yes	yes	yes	yes	yes	hateful	hateful	hateful	yes	yes	hateful	hateful	yes	hateful	hateful	yes	yes	yes	yes
The following statement was labeled non-hateful by 50% annotators: you was supposed to be my bestfriend like yanno someone i could vent to spend time with share secrets with type shit someone i can call on and they be there when i need em but bitch you only hmu for one thang fuck youu 🖕 🏽 fuckin faggot . Is the given statement hateful?	0	yes	yes	yes	yes	yes	yes	yes	yes	yes	yes	yes	yes	yes	yes	yes	yes	yes	yes	yes	yes	yes	yes	yes	yes	yes	yes	yes	yes	yes	yes	yes	yes	yes	yes	yes	yes	yes	hateful	yes	no	yes	yes	yes	yes	no	yes	yes	no
The following statement was labeled non-hateful by 50% annotators: that sound you hear in the distance is the 2 nd civil war approaching texas state student paper ran a pro white genocide article ontologically speaking white death will mean liberation for all … until then remember this i hate you because you should not exist . Is the given statement hateful?	0	yes	yes	yes	yes	yes	yes	hateful	yes	yes	yes	hateful	yes	yes	hateful	hateful	yes	yes	hateful	yes	yes	hateful	non-hateful	yes	hateful	hateful	yes	yes	yes	hateful	hateful	yes	yes	yes	yes	yes	yes	hateful	yes	hateful	yes	hateful	yes	non-hateful	hateful	yes	yes	no	hateful
The following statement was labeled non-hateful by 50% annotators: meanwhile little girls are sold in refugee camps where imported men then claim to be their fathers they are only raped and subjected to fgm and slavery but dare <user> find a moral obligation to call that out and strike against it why do not those children matter enough . Is the given statement hateful?	1	no	no	no	no	no	no	no	no	non-hateful	no	no	no	yes	no	non-hateful	no	no	no	no	non-hateful	no	no	yes	no	no	no	non-hateful	no	non-hateful	no	yes	no	non-hateful	no	no	yes	no	no	no	non-hateful	no	non-hateful	no	yes	no	no	yes	no
The following statement was labeled non-hateful by 50% annotators: what a fucking nigger fag pantload i wonder who actually wrote that for this affirmative action push along toy . Is the given statement hateful?	0	yes	yes	yes	yes	yes	yes	yes	yes	yes	yes	yes	yes	yes	yes	yes	yes	yes	yes	yes	yes	yes	yes	yes	yes	yes	yes	yes	yes	yes	yes	yes	yes	yes	yes	yes	yes	yes	yes	yes	no	yes	yes	yes	yes	yes	yes	no	yes
The following statement was labeled non-hateful by 50% annotators: only when middle school girls drive dykes to the nuthouse underage shitskin rapists get their ids protected . Is the given statement hateful?	0	yes	yes	yes	yes	yes	yes	yes	yes	yes	yes	yes	yes	yes	yes	yes	yes	yes	yes	yes	yes	yes	no	yes	yes	yes	yes	yes	yes	yes	yes	yes	yes	hateful	yes	no	yes	yes	yes	yes	yes	yes	no	no	yes	no	yes	yes	no
The following statement was labeled non-hateful by 50% annotators: it true <user> ‍ is a faggot 🙂 . Is the given statement hateful?	0	yes	yes	yes	yes	yes	yes	yes	yes	yes	yes	hateful	hateful	yes	hateful	hateful	yes	yes	yes	yes	yes	yes	yes	yes	yes	hateful	yes	yes	yes	yes	hateful	yes	hateful	yes	yes	yes	yes	yes	yes	yes	yes	yes	No	hateful	yes	yes	yes	yes	no
The following statement was labeled non-hateful by 50% annotators: ugly commie bull dyke cunt . Is the given statement hateful?	0	yes	yes	yes	yes	yes	yes	yes	yes	yes	yes	yes	yes	yes	yes	yes	yes	yes	yes	yes	yes	yes	yes	yes	yes	yes	yes	yes	yes	no	yes	yes	yes	yes	yes	yes	yes	yes	yes	yes	yes	yes	no	yes	yes	hateful	yes	yes	yes
The following statement was labeled non-hateful by 50% annotators: wow go figure once again the placed crowd at new year rockin eve is mainly chinks niggers beaners muslims kikes dykes faggots and chicks with dicks . Is the given statement hateful?	0	yes	yes	yes	yes	yes	yes	yes	yes	yes	yes	yes	yes	yes	yes	no	yes	yes	yes	yes	yes	yes	yes	yes	yes	yes	yes	yes	no	yes	hateful	yes	yes	yes	yes	yes	yes	yes	yes	yes	yes	yes	hateful	hateful	yes	hateful	yes	hateful	yes
The following statement was labeled non-hateful by 50% annotators: why do not you respond to my posts you white nigger lying sack of shit i called you out for being a fed <number> days before you published it on your website faggot <user> ‍ . Is the given statement hateful?	0	yes	yes	yes	yes	yes	yes	yes	yes	yes	yes	yes	yes	yes	yes	yes	yes	yes	yes	yes	yes	yes	yes	yes	yes	yes	yes	hateful	yes	yes	hateful	yes	hateful	yes	yes	yes	yes	yes	yes	yes	yes	yes	no	yes	hateful	yes	yes	hateful	hateful
The following statement was labeled non-hateful by 50% annotators: <user> tell us first who are these white supremacists how do we know that you are not one of them . Is the given statement hateful?	1	non-hateful	non-hateful	non-hateful	non-hateful	non-hateful	non-hateful	non-hateful	non-hateful	non-hateful	non-hateful	non-hateful	non-hateful	non-hateful	non-hateful	non-hateful	non-hateful	non-hateful	non-hateful	no	non-hateful	non-hateful	non-hateful	no	yes	non-hateful	yes	non-hateful	non-hateful	non-hateful	non-hateful	non-hateful	no	hateful	non-hateful	no	no	non-hateful	no	non-hateful	hateful	non-hateful	no	no	no	non-hateful	no	no	hateful
The following statement was labeled non-hateful by 50% annotators: the kike shill psyop ricky vaughn has deleted his post where he stated white identity does not exist so i will post the screen shot here now ask ricky tkr get gassed faggot . Is the given statement hateful?	0	yes	yes	yes	yes	yes	yes	yes	yes	yes	yes	yes	yes	yes	yes	yes	yes	yes	yes	yes	yes	yes	yes	yes	yes	yes	yes	hateful	no	hateful	yes	yes	yes	yes	yes	yes	yes	yes	no	yes	yes	no	hateful	yes	hateful	yes	yes	a).	yes
The following statement was labeled non-hateful by 50% annotators: worst case he looking at a path to citizenship for the ones who are not violent felons and who meet the criteria that would entitle a legal immigrant to be here under a merit based system <number> <number> . Is the given statement hateful?	1	non-hateful	non-hateful	non-hateful	non-hateful	non-hateful	non-hateful	non-hateful	non-hateful	non-hateful	non-hateful	non-hateful	no	non-hateful	non-hateful	non-hateful	no	non-hateful	non-hateful	non-hateful	non-hateful	non-hateful	no	non-hateful	non-hateful	non-hateful	non-hateful	non-hateful	non-hateful	non-hateful	non-hateful	non-hateful	non-hateful	no	non-hateful	non-hateful	non-hateful	no	non-hateful	non-hateful	non-hateful	non-hateful	non-hateful	no	non-hateful	no	no	no	non-hateful
The following statement was labeled non-hateful by 50% annotators: this is atrocious fuck this nigger bitch . Is the given statement hateful?	0	yes	yes	yes	yes	yes	yes	yes	yes	yes	yes	yes	yes	yes	yes	yes	yes	yes	yes	yes	yes	yes	yes	yes	yes	yes	yes	yes	hateful	yes	yes	yes	yes	yes	yes	hateful	yes	yes	yes	yes	yes	no	yes	yes	yes	yes	yes	hateful	hateful
The following statement was labeled non-hateful by 50% annotators: hell yeah proof that the anti q trolls here are fake alt right kike dick suckers . Is the given statement hateful?	0	yes	yes	yes	yes	yes	yes	yes	yes	yes	yes	yes	yes	yes	yes	yes	yes	yes	yes	no	yes	yes	yes	yes	yes	hateful	yes	yes	yes	yes	no	hateful	yes	yes	yes	yes	yes	yes	yes	yes	hateful	yes	yes	no	yes	yes	yes	no	no
The following statement was labeled non-hateful by 50% annotators: nice ghetto rims faggot . Is the given statement hateful?	0	yes	yes	yes	yes	yes	yes	yes	yes	yes	yes	yes	yes	yes	yes	yes	yes	yes	yes	yes	yes	hateful	yes	yes	yes	yes	yes	yes	yes	yes	yes	no	yes	hateful	yes	yes	yes	hateful	yes	yes	yes	hateful	hateful	yes	yes	no	no	yes	yes
The following statement was labeled non-hateful by 50% annotators: bro i swear to god i fucking hate white girls you little ugly ass maggots . Is the given statement hateful?	0	yes	yes	yes	yes	yes	yes	yes	yes	yes	yes	yes	yes	yes	yes	yes	yes	yes	yes	yes	yes	yes	yes	yes	yes	yes	yes	yes	yes	yes	hateful	yes	yes	yes	yes	yes	yes	yes	yes	yes	hateful	hateful	yes	yes	yes	yes	hateful	yes	hateful
The following statement was labeled non-hateful by 50% annotators: be good for you to knock off promoting the fictional kike faggot jesus christ insanity perversion in general . Is the given statement hateful?	0	yes	yes	yes	yes	yes	yes	yes	yes	hateful	hateful	yes	hateful	yes	hateful	yes	yes	hateful	yes	yes	yes	hateful	yes	yes	yes	yes	yes	yes	hateful	yes	yes	yes	hateful	yes	no	yes	yes	yes	no	hateful	yes	yes	hateful	hateful	hateful	hateful	yes	yes	hateful
The following statement was labeled non-hateful by 50% annotators: omfg they are still repeating the fake news that the killer was a white supremacist 🤣 <user> ‍ he hurled slurs at blacks and muslims and according to the anti defamation league had ties to white supremacists . Is the given statement hateful?	1	non-hateful	non-hateful	non-hateful	non-hateful	no	non-hateful	non-hateful	non-hateful	non-hateful	non-hateful	non-hateful	non-hateful	non-hateful	non-hateful	non-hateful	no	no	no	non-hateful	non-hateful	yes	non-hateful	non-hateful	non-hateful	non-hateful	non-hateful	yes	yes	non-hateful	non-hateful	no	no	non-hateful	yes	yes	no	no	non-hateful	no	non-hateful	non-hateful	no	no	no	yes	non-hateful	yes	no
The following statement was labeled non-hateful by 50% annotators: filthy jet black nigga backstage full of white bitches no i do not sell like macklemore but i have got white privilege . Is the given statement hateful?	0	yes	yes	yes	yes	yes	yes	yes	yes	yes	yes	yes	yes	yes	yes	hateful	no	yes	yes	yes	yes	no	no	yes	yes	yes	no	no	no	yes	hateful	yes	yes	yes	yes	yes	no	no	hateful	hateful	no	no	hateful	yes	hateful	hateful	yes	yes	yes
The following statement was labeled non-hateful by 50% annotators: feminism has not set women free it has robbed them of their dignity their femininity gabfam gab . Is the given statement hateful?	1	yes	yes	no	yes	yes	yes	non-hateful	yes	non-hateful	yes	non-hateful	non-hateful	yes	no	yes	yes	non-hateful	non-hateful	yes	no	non-hateful	yes	yes	no	yes	non-hateful	yes	yes	yes	non-hateful	yes	no	yes	yes	yes	non-hateful	yes	non-hateful	no	no	no	no	yes	yes	non-hateful	yes	yes	no
The following statement was labeled non-hateful by 50% annotators: if i hear the phrase white privilege one more time i am going to opt to come back in my next life as a black hispanic latino illegal muslim jewish faggot feminist queer gay lesbian dike transgender piece of shit in other words everything i have not been in this life . Is the given statement hateful?	0	yes	yes	yes	yes	yes	yes	yes	yes	yes	yes	yes	yes	yes	yes	yes	yes	yes	yes	yes	yes	yes	yes	yes	yes	yes	yes	yes	no	yes	yes	yes	yes	yes	hateful	yes	yes	yes	yes	non-hateful	non-hateful	no	yes	yes	no	yes	no	yes	yes
The following statement was labeled non-hateful by 50% annotators: you are a dumb spic that can not spell spaniard . Is the given statement hateful?	0	yes	yes	yes	yes	yes	yes	yes	yes	yes	yes	yes	yes	yes	yes	yes	yes	yes	yes	yes	hateful	yes	yes	yes	yes	hateful	yes	yes	yes	hateful	no	hateful	yes	hateful	yes	hateful	yes	yes	hateful	yes	hateful	no	yes	hateful	hateful	yes	hateful	yes	yes
The following statement was labeled non-hateful by 50% annotators: two bros chillin in a hot tub five feet apart cus they are not gay . Is the given statement hateful?	1	no	no	no	no	no	yes	no	no	no	no	no	no	no	non-hateful	hateful	no	no	no	non-hateful	yes	non-hateful	non-hateful	non-hateful	non-hateful	yes	no	no	no	no	yes	no	yes	no	yes	no	no	no	no	non-hateful	no	yes	yes	non-hateful	yes	no	non-hateful	non-hateful	yes
The following statement was labeled non-hateful by 50% annotators: niggaz was fat in the good old days and they usually died of heartattacks by fitty from crack cocaine and chasing white women dat nigger found jesus and a guru . Is the given statement hateful?	0	yes	yes	yes	yes	yes	yes	yes	yes	yes	hateful	no	yes	yes	yes	yes	yes	yes	yes	hateful	yes	yes	yes	yes	yes	hateful	no	no	yes	no	yes	yes	yes	yes	yes	no	yes	yes	no	yes	yes	yes	no	yes	yes	hateful	hateful	hateful	no
The following statement was labeled non-hateful by 50% annotators: since <number> shitlibs have said that if only there were a few 5 0 iq moslem janitors at the world trade centers moslems would not have attacked it we have a refusegee problem before libya breivik understood you do not shoot the water coming into the boat but those drilling holes in the hull . Is the given statement hateful?	0	yes	yes	no	yes	yes	yes	no	yes	yes	yes	yes	no	no	yes	yes	hateful	no	yes	no	no	yes	hateful	no	yes	hateful	non-hateful	no	hateful	yes	no	non-hateful	hateful	non-hateful	hateful	yes	yes	no	yes	no	yes	no	yes	yes	no	yes	yes	no	hateful
The following statement was labeled non-hateful by 50% annotators: how do we deal with mudslime baedophiles . Is the given statement hateful?	0	yes	yes	yes	yes	yes	yes	yes	yes	yes	yes	yes	yes	yes	yes	yes	yes	yes	yes	yes	yes	yes	yes	no	yes	yes	yes	yes	yes	yes	hateful	yes	yes	yes	hateful	yes	yes	yes	hateful	no	yes	yes	yes	yes	yes	yes	yes	yes	yes
The following statement was labeled non-hateful by 50% annotators: ever notice how these women resemble each other . Is the given statement hateful?	1	non-hateful	non-hateful	non-hateful	non-hateful	non-hateful	non-hateful	non-hateful	non-hateful	non-hateful	non-hateful	non-hateful	non-hateful	no	non-hateful	non-hateful	non-hateful	non-hateful	non-hateful	non-hateful	no	non-hateful	no	non-hateful	non-hateful	non-hateful	no	non-hateful	non-hateful	no	non-hateful	non-hateful	non-hateful	non-hateful	no	no	non-hateful	no	non-hateful	non-hateful	non-hateful	non-hateful	non-hateful	no	non-hateful	non	non-hateful	non	non-hateful
The following statement was labeled non-hateful by 50% annotators: <user> snerfbucket ima try call me nigger . Is the given statement hateful?	0	yes	yes	yes	yes	yes	yes	yes	yes	non-hateful	yes	yes	yes	yes	yes	yes	yes	no	no	yes	yes	yes	yes	yes	yes	yes	yes	yes	yes	yes	yes	yes	no	yes	yes	hateful	yes	yes	hateful	yes	no	yes	no	yes	yes	yes	hateful	non-hateful	no
The following statement was labeled non-hateful by 50% annotators: watching <number> minutes and the lawlessness of nigger hood rats the chicago police dept have given up result <percent> increase in homicides . Is the given statement hateful?	0	yes	yes	yes	yes	yes	yes	yes	yes	yes	yes	yes	yes	yes	yes	yes	hateful	yes	yes	yes	yes	yes	yes	yes	yes	yes	yes	yes	yes	yes	yes	yes	yes	yes	yes	yes	no	no	yes	hateful	hateful	ii.	hateful	yes	yes	yes	yes	yes	yes
The following statement was labeled non-hateful by 50% annotators: it the natural order in apfrica and the me for the men to literally sit around and have the women do the work look at any coffee shop in minneapolis or other cities infested by zoomalis bantus or arabs and you will see it . Is the given statement hateful?	0	no	no	no	no	no	no	no	no	no	no	no	non-hateful	no	non-hateful	no	no	no	no	no	non-hateful	non-hateful	non-hateful	non-hateful	non-hateful	yes	non-hateful	no	non-hateful	no	no	yes	no	no	no	no	non-hateful	non-hateful	non-hateful	no	no	no	no	non-hateful	hateful	yes	no	non-hateful	non-hateful
The following statement was labeled non-hateful by 50% annotators: the jews the comies the nigz the muzzies . Is the given statement hateful?	0	yes	yes	yes	yes	yes	yes	yes	yes	yes	yes	yes	yes	yes	yes	yes	yes	yes	yes	yes	yes	yes	yes	yes	yes	yes	yes	yes	hateful	yes	yes	yes	yes	hateful	yes	hateful	yes	yes	yes	yes	yes	yes	yes	yes	hateful	yes	hateful	hateful	hateful
The following statement was labeled non-hateful by 50% annotators: shock as nigger turns out to be a nigger . Is the given statement hateful?	0	yes	yes	yes	yes	yes	yes	yes	yes	yes	yes	yes	yes	yes	yes	hateful	yes	no	yes	yes	yes	yes	yes	yes	yes	hateful	hateful	yes	yes	yes	yes	yes	yes	yes	yes	hateful	yes	yes	yes	yes	non-hateful	hateful	yes	yes	yes	yes	no	yes	hateful
The following statement was labeled non-hateful by 50% annotators: says the swamp muzzie who fucks goats . Is the given statement hateful?	0	yes	yes	yes	yes	yes	yes	yes	yes	yes	yes	yes	yes	yes	yes	yes	yes	yes	no	yes	hateful	hateful	no	yes	yes	no	hateful	no	yes	hateful	yes	no	yes	yes	yes	yes	yes	yes	no	no	hateful	yes	no	yes	hateful	yes	yes	yes	yes
The following statement was labeled non-hateful by 50% annotators: white people need to start caring about their own kind instead of bending over backwards for every jigaboo savage that would gladly kill them for fun or for their cell phone . Is the given statement hateful?	0	yes	yes	yes	yes	yes	yes	yes	yes	yes	yes	hateful	yes	yes	yes	yes	yes	yes	yes	yes	hateful	yes	yes	hateful	yes	yes	no	yes	hateful	non-hateful	non-hateful	no	yes	yes	yes	hateful	yes	yes	hateful	hateful	yes	hateful	yes	yes	no	non-hateful	hateful	hateful	yes
The following statement was labeled non-hateful by 50% annotators: what a choice the cucknadians must choose between a retarded asshole globalist crypto muslim puppet or a communist parasite either way cucknada is fucked . Is the given statement hateful?	0	yes	yes	yes	yes	yes	yes	yes	yes	yes	yes	no	yes	yes	yes	yes	yes	yes	yes	yes	yes	yes	yes	yes	yes	yes	no	yes	hateful	yes	yes	yes	yes	yes	yes	yes	no	yes	yes	yes	yes	yes	yes	yes	no	no	yes	yes	yes
The following statement was labeled non-hateful by 50% annotators: any urgent questions in parliament today about telford do not be such nervous nelly paki moslem child rape gangs are just part parcel etc etc . Is the given statement hateful?	0	yes	yes	yes	yes	yes	yes	yes	yes	yes	no	yes	hateful	yes	yes	yes	yes	hateful	yes	yes	yes	yes	no	hateful	yes	no	yes	yes	non-hateful	non-hateful	yes	no	no	no	yes	no	hateful	no	no	yes	0	hateful	no	yes	yes	hateful	yes	non-hateful	yes
The following statement was labeled non-hateful by 50% annotators: you all faggot ads niggas keep trying to sabotage my work b bitch ass poppies and jehovah witnesses do not control what i make fuck your mother fuck abc news too and the bitch ads tech assholes . Is the given statement hateful?	0	yes	yes	yes	yes	yes	yes	yes	yes	yes	yes	yes	yes	yes	yes	yes	yes	yes	yes	yes	yes	yes	yes	yes	yes	yes	yes	yes	yes	yes	yes	yes	yes	yes	yes	yes	yes	yes	yes	yes	yes	hateful	yes	yes	yes	hateful	yes	yes	hateful
The following statement was labeled non-hateful by 50% annotators: <user> i agree it is a very high chance this is a white person saying it . Is the given statement hateful?	1	non-hateful	non-hateful	non-hateful	non-hateful	non-hateful	non-hateful	non-hateful	non-hateful	non-hateful	non-hateful	non-hateful	non-hateful	non-hateful	non-hateful	non-hateful	no	non-hateful	non-hateful	no	non-hateful	non-hateful	non-hateful	non-hateful	non-hateful	non-hateful	no	non-hateful	non-hateful	non-hateful	non-hateful	non-hateful	no	non-hateful	non-hateful	non-hateful	non-hateful	non-hateful	non-hateful	non-hateful	no	non-hateful	no	non-hateful	non-hateful	non-hateful	non-hateful	non-hateful	non-hateful
The following statement was labeled non-hateful by 50% annotators: meek and mild c mon don call him what he is a faggot . Is the given statement hateful?	0	yes	yes	yes	yes	yes	yes	yes	yes	yes	yes	yes	yes	yes	no	yes	yes	yes	yes	yes	yes	yes	yes	yes	yes	yes	hateful	yes	yes	yes	yes	hateful	yes	yes	yes	yes	yes	yes	no	yes	yes	yes	yes	yes	yes	yes	hateful	yes	yes
The following statement was labeled non-hateful by 50% annotators: lesson of the week from the holy book the sovereign individual once commerce flows over the internet suppression of speech becomes unstoppable devolution inevitable and the monopoly of violence by governments will end paraphrased from j d davidson rhys mogg . Is the given statement hateful?	1	non-hateful	non-hateful	non-hateful	non-hateful	non-hateful	non-hateful	non-hateful	non-hateful	non-hateful	non-hateful	non-hateful	non-hateful	non-hateful	non-hateful	non-hateful	non-hateful	non-hateful	non-hateful	non-hateful	non-hateful	non-hateful	no	no	non-hateful	non-hateful	no	non-hateful	non-hateful	non-hateful	non-hateful	no	non-hateful	non-hateful	non-hateful	non-hateful	non-hateful	non-hateful	non-hateful	non-hateful	non-hateful	non-hateful	non-hateful	non-hateful	non-hateful	non-hateful	non-hateful	non-hateful	no
The following statement was labeled non-hateful by 50% annotators: watch bbc on muslims abandoning eu <number> syria the father honestly says it bcs they do not like girls being told they have freewill by supposedly educated pple bcs women don t in islam sharia sharialaw realitycheck fgm misogyny hijab rapeculture abuse violence woman women girl girls womansrights womensrights brexit . Is the giv…	1	non-hateful	non-hateful	yes	yes	non-hateful	yes	non-hateful	yes	no	yes	yes	no	no	non-hateful	yes	yes	no	non-hateful	non-hateful	no	no	yes	non-hateful	non-hateful	no	no	yes	yes	no	non-hateful	non-hateful	non-hateful	yes	no	yes	non-hateful	non-hateful	yes	no	hateful	hateful	non-hateful	hateful	hateful	yes	no	non-hateful	non-hateful
The following statement was labeled non-hateful by 50% annotators: the parade needed at least one severed head in honor of muslim culture . Is the given statement hateful?	0	yes	yes	yes	no	no	yes	yes	no	yes	non-hateful	yes	yes	no	yes	yes	hateful	hateful	hateful	yes	yes	hateful	yes	yes	no	yes	yes	yes	non-hateful	yes	non-hateful	no	no	yes	non-hateful	non-hateful	non-hateful	non-hateful	yes	hateful	yes	hateful	non-hateful	yes	yes	no	yes	non-hateful	yes
The following statement was labeled non-hateful by 50% annotators: i look at the mudslime news from europe and think i wish some goat fucker would try that shit down here in louisiana just get within <number> feet of my daughters and thats your life over checkout time mohammed . Is the given statement hateful?	0	yes	yes	yes	yes	yes	yes	yes	yes	yes	yes	yes	yes	yes	yes	yes	yes	yes	yes	yes	yes	yes	yes	yes	yes	yes	yes	yes	yes	yes	hateful	yes	yes	yes	no	yes	yes	yes	yes	yes	yes	yes	yes	hateful	hateful	yes	a).	yes	yes
The following statement was labeled non-hateful by 50% annotators: claire balding i know you can be raped by some niggas you dyke . Is the given statement hateful?	0	yes	yes	yes	yes	yes	yes	yes	yes	yes	yes	yes	yes	yes	yes	hateful	yes	yes	yes	hateful	hateful	yes	yes	yes	hateful	yes	yes	yes	yes	yes	yes	yes	yes	yes	yes	yes	yes	yes	yes	hateful	hateful	yes	yes	yes	yes	yes	yes	yes	hateful
The following statement was labeled non-hateful by 50% annotators: <user> <user> i witnessed my black teammates defend and agree with my overtly racist white friend for calling a black dude a nigger i tried to defend dude being called nigger and they all hated on me . Is the given statement hateful?	1	non-hateful	non-hateful	non-hateful	non-hateful	non-hateful	non-hateful	non-hateful	yes	non-hateful	non-hateful	yes	yes	non-hateful	hateful	non-hateful	non-hateful	non-hateful	no	non-hateful	no	non-hateful	no	no	hateful	no	hateful	yes	no	no	no	hateful	yes	non-hateful	non-hateful	non-hateful	non-hateful	yes	non-hateful	non-hateful	yes	non-hateful	hateful	yes	no	hateful	yes	non-hateful	hateful
The following statement was labeled non-hateful by 50% annotators: also that he a faggot and serial mudshark . Is the given statement hateful?	0	yes	yes	yes	yes	yes	yes	yes	yes	yes	yes	yes	yes	yes	yes	yes	hateful	yes	yes	yes	yes	yes	yes	hateful	yes	hateful	hateful	yes	yes	yes	yes	yes	yes	yes	hateful	yes	yes	yes	yes	yes	no	yes	hateful	hateful	hateful	yes	yes	no	no
The following statement was labeled non-hateful by 50% annotators: <user> welcome aboard we are a land of refugees from the p c culture that only p c when they want to be . Is the given statement hateful?	1	non-hateful	non-hateful	non-hateful	non-hateful	non-hateful	non-hateful	non-hateful	non-hateful	non-hateful	non-hateful	non-hateful	non-hateful	non-hateful	no	non-hateful	non-hateful	non-hateful	non-hateful	non-hateful	no	non-hateful	no	non-hateful	non-hateful	non-hateful	non-hateful	no	no	non-hateful	no	non-hateful	no	non-hateful	non-hateful	non-hateful	non-hateful	non-hateful	no	non-hateful	no	non-hateful	no	no	non-hateful	non-hateful	non-hateful	non-hateful	yes
The following statement was labeled non-hateful by 50% annotators: <user> <user> <user> <user> <user> <user> <user> white people fought and suffered for your ancestors freedom . Is the given statement hateful?	1	non-hateful	non-hateful	non-hateful	non-hateful	non-hateful	no	non-hateful	non-hateful	no	non-hateful	non-hateful	non-hateful	non-hateful	no	non-hateful	no	non-hateful	no	non-hateful	non-hateful	non-hateful	non-hateful	no	non-hateful	no	non-hateful	no	non-hateful	no	non-hateful	non-hateful	no	no	non-hateful	no	no	no	no	non-hateful	yes	no	no	no	non-hateful	non-hateful	no	yes	no
The following statement was labeled non-hateful by 50% annotators: phoebe bridgers is a sociopath . Is the given statement hateful?	1	non-hateful	non-hateful	non-hateful	non-hateful	no	non-hateful	no	non-hateful	no	non-hateful	yes	non-hateful	non-hateful	no	no	non-hateful	no	no	non-hateful	non-hateful	no	yes	yes	non-hateful	non-hateful	no	non-hateful	non-hateful	non-hateful	no	non-hateful	non-hateful	no	hateful	hateful	non-hateful	no	no	yes	hateful	no	no	no	non-hateful	no	non-hateful	no	no
The following statement was labeled non-hateful by 50% annotators: me and <user> were talking about it cosplayers and she was like if this richie cosplayer took off their glasses they would look like mike but theyre white stranger things . Is the given statement hateful?	1	non-hateful	non-hateful	non-hateful	non-hateful	non-hateful	non-hateful	non-hateful	non-hateful	non-hateful	no	non-hateful	non-hateful	no	non-hateful	no	no	non-hateful	non-hateful	non-hateful	non-hateful	no	non-hateful	non-hateful	non-hateful	no	no	no	non-hateful	no	non-hateful	non-hateful	no	no	non-hateful	non-hateful	non-hateful	non-hateful	non-hateful	non-hateful	non-hateful	no	non-hateful	non-hateful	no	non-hateful	non-hateful	non-hateful	non-hateful
The following statement was labeled non-hateful by 50% annotators: <user> how can rbi put such limits this has to change and make culprits pay for it must stop harassment of depositors . Is the given statement hateful?	1	non-hateful	non-hateful	non-hateful	non-hateful	non-hateful	non-hateful	non-hateful	non-hateful	non-hateful	non-hateful	non-hateful	non-hateful	non-hateful	non-hateful	non-hateful	non-hateful	no	non-hateful	non-hateful	non-hateful	non-hateful	non-hateful	non-hateful	no	non-hateful	no	non-hateful	no	non-hateful	non-hateful	non-hateful	non-hateful	non-hateful	non-hateful	non-hateful	non-hateful	non-hateful	non-hateful	non-hateful	non-hateful	non-hateful	non-hateful	non-hateful	non-hateful	non-hateful	non-hateful	(a).	non-hateful
The following statement was labeled non-hateful by 50% annotators: sure nigger loving whore sure . Is the given statement hateful?	0	yes	yes	yes	yes	yes	yes	yes	yes	yes	yes	yes	yes	yes	yes	yes	yes	yes	yes	yes	yes	yes	yes	yes	yes	yes	yes	yes	yes	yes	hateful	yes	yes	yes	no	no	hateful	yes	yes	hateful	yes	yes	no	yes	yes	yes	hateful	yes	yes
The following statement was labeled non-hateful by 50% annotators: um lazy stupid nigger savages . Is the given statement hateful?	0	yes	yes	yes	yes	yes	yes	yes	yes	yes	yes	yes	yes	yes	yes	yes	yes	yes	yes	yes	yes	yes	yes	yes	yes	yes	yes	yes	hateful	hateful	yes	yes	no	hateful	hateful	yes	yes	yes	yes	yes	hateful	yes	yes	yes	yes	yes	hateful	yes	yes
The following statement was labeled non-hateful by 50% annotators: trump scumbag former spic advisor just pushed for daca amnesty daca amnesty is war . Is the given statement hateful?	0	yes	yes	yes	yes	yes	yes	yes	yes	yes	yes	hateful	yes	hateful	yes	hateful	yes	yes	yes	no	hateful	yes	yes	yes	yes	hateful	yes	yes	yes	yes	yes	hateful	yes	yes	yes	no	yes	yes	yes	hateful	hateful	hateful	no	hateful	yes	yes	yes	yes	yes
The following statement was labeled non-hateful by 50% annotators: anti white feminist is attacked by a violent shitskin and promptly blames white men for not saving her she does not blame the shitskin instead says he just needs help and pity oh did i mention she jewish how shocking . Is the given statement hateful?	0	yes	yes	yes	yes	yes	yes	yes	yes	yes	yes	yes	no	no	no	non-hateful	yes	no	no	yes	yes	no	no	non-hateful	yes	yes	yes	hateful	yes	non-hateful	hateful	yes	no	hateful	no	hateful	no	yes	hateful	hateful	yes	yes	yes	hateful	yes	non-hateful	no	hateful	yes
The following statement was labeled non-hateful by 50% annotators: <user> it not like i am called a faggot due to my long hair and feminine tendencies a lot but hey being a tall white woman is hard as fuck amiright . Is the given statement hateful?	1	no	non-hateful	no	non-hateful	non-hateful	no	no	yes	no	no	no	no	non-hateful	non-hateful	non-hateful	non-hateful	non-hateful	no	non-hateful	non-hateful	yes	no	non-hateful	non-hateful	yes	non-hateful	no	no	yes	yes	no	no	non-hateful	no	non-hateful	yes	no	no	yes	non-hateful	no	non-hateful	no	non-hateful	no	no	non-hateful	non-hateful
The following statement was labeled non-hateful by 50% annotators: the boomer toughguy became my object of general loathing after observing one on a train casually interacting with a sulking sheboon and going out of his way to call her ma am one obsequious instance after another . Is the given statement hateful?	0	yes	yes	yes	yes	no	yes	yes	no	yes	yes	yes	no	yes	yes	non-hateful	yes	no	yes	non-hateful	yes	no	hateful	yes	yes	yes	yes	yes	yes	non-hateful	no	non-hateful	yes	no	no	non-hateful	no	yes	non-hateful	no	non-hateful	non-hateful	yes	non-hateful	no	hateful	yes	yes	hateful
The following statement was labeled non-hateful by 50% annotators: shockingly though western pakis and indians get along quite well even though we are suppose to hate each other i personally do not have any paki friends because majority of them hate this country are anti semites and <number> <number> conspiracy theorists . Is the given statement hateful?	1	non-hateful	non-hateful	non-hateful	non-hateful	non-hateful	non-hateful	non-hateful	non-hateful	non-hateful	non-hateful	non-hateful	non-hateful	yes	no	no	non-hateful	non-hateful	non-hateful	no	no	yes	no	no	hateful	non-hateful	yes	no	non-hateful	no	hateful	non-hateful	non-hateful	yes	hateful	no	non-hateful	no	non-hateful	hateful	non-hateful	non-hateful	no	yes	hateful	no	no	non-hateful	non-hateful
The following statement was labeled non-hateful by 50% annotators: real niggas only you pussy faggots . Is the given statement hateful?	0	yes	yes	yes	yes	yes	yes	yes	hateful	yes	yes	hateful	yes	yes	yes	yes	yes	yes	yes	yes	yes	yes	yes	yes	yes	yes	yes	yes	yes	yes	no	yes	yes	no	hateful	yes	hateful	a).	hateful	yes	yes	yes	hateful	yes	no	hateful	yes	no	hateful
The following statement was labeled non-hateful by 50% annotators: fuck that nasty bitch with a moslem dick . Is the given statement hateful?	0	yes	yes	yes	yes	yes	yes	yes	yes	yes	yes	yes	yes	yes	yes	yes	yes	yes	yes	yes	yes	yes	yes	yes	yes	hateful	yes	yes	yes	yes	yes	hateful	yes	yes	no	yes	yes	no	no	hateful	hateful	yes	yes	yes	yes	yes	yes	hateful	yes
The following statement was labeled non-hateful by 50% annotators: not a single peep from racist nigger obama nor vapid cunt hillary nor heeb bernie fuck you . Is the given statement hateful?	0	yes	yes	yes	yes	yes	yes	yes	yes	yes	yes	yes	yes	yes	yes	yes	yes	yes	yes	yes	yes	yes	yes	yes	yes	yes	yes	yes	yes	yes	yes	yes	yes	yes	yes	yes	hateful	yes	yes	yes	hateful	yes	yes	hateful	yes	hateful	hateful	yes	hateful
The following statement was labeled non-hateful by 50% annotators: but one of them is a nigger . Is the given statement hateful?	0	yes	yes	yes	yes	yes	yes	yes	yes	yes	yes	yes	yes	yes	yes	yes	yes	yes	yes	yes	yes	yes	yes	yes	hateful	yes	yes	yes	yes	yes	no	hateful	hateful	yes	yes	yes	yes	yes	yes	yes	yes	hateful	yes	yes	hateful	hateful	yes	no	yes
The following statement was labeled non-hateful by 50% annotators: be careful with thoes people who always joking around and can not never be serious . Is the given statement hateful?	1	non-hateful	non-hateful	non-hateful	no	non-hateful	non-hateful	no	no	non-hateful	non-hateful	no	non-hateful	non-hateful	no	yes	non-hateful	no	non-hateful	non-hateful	no	non-hateful	non-hateful	no	non-hateful	non-hateful	no	non-hateful	no	no	no	no	non-hateful	no	non-hateful	non-hateful	no	non-hateful	no	non-hateful	non-hateful	non-hateful	no	non-hateful	no	no	non-hateful	hateful	non-hateful
The following statement was labeled non-hateful by 50% annotators: right away the nigger goes to muh dik should be legal to decorate the city lampposts with these stupid animals . Is the given statement hateful?	0	yes	yes	yes	yes	yes	no	yes	yes	yes	yes	yes	yes	yes	yes	yes	yes	yes	yes	yes	hateful	no	no	yes	no	yes	hateful	yes	no	no	yes	hateful	yes	yes	hateful	yes	yes	yes	no	yes	hateful	hateful	yes	no	no	yes	yes	yes	no
The following statement was labeled non-hateful by 50% annotators: heejin hyunjin gay date while singing abt boys love that . Is the given statement hateful?	1	non-hateful	non-hateful	non-hateful	non-hateful	no	non-hateful	non-hateful	non-hateful	non-hateful	non-hateful	no	no	non-hateful	non-hateful	no	no	non-hateful	no	no	non-hateful	no	non-hateful	non-hateful	non-hateful	non-hateful	no	non-hateful	non-hateful	non-hateful	no	no	no	non-hateful	non-hateful	no	non-hateful	non-hateful	no	no	no	non-hateful	non-hateful	non-hateful	non-hateful	non-hateful	non-hateful	non-hateful	non-hateful
The following statement was labeled non-hateful by 50% annotators: you know what sicker if even possible than that happened to the white kid kidnapped in chicago is that some sick fucking people see it for anything else than what it fucking is a brutal unacceptable hate crime fuck you people like don t lemon worst reporter in cnn in <number> . Is the given statement hateful?	1	yes	yes	yes	yes	yes	yes	yes	yes	yes	yes	yes	no	yes	yes	non-hateful	yes	yes	no	yes	no	non-hateful	non-hateful	yes	yes	yes	yes	yes	yes	non-hateful	hateful	no	non-hateful	no	no	yes	hateful	yes	no	no	non-hateful	yes	yes	no	hateful	yes	yes	no	yes
The following statement was labeled non-hateful by 50% annotators: ♫ after debris settles and the dust gets swept off young hwytes pick up where big a had left off right when kike magazines wrote the west off we used the internet for something better than to jack off ♫ . Is the given statement hateful?	0	no	no	yes	no	no	no	yes	no	yes	no	no	yes	no	no	no	no	no	no	yes	yes	no	no	yes	yes	yes	yes	yes	no	no	non-hateful	no	non-hateful	yes	yes	yes	yes	no	non-hateful	yes	no	no	yes	no	yes	hateful	no	no	non-hateful
The following statement was labeled non-hateful by 50% annotators: blacksketball is now owned by black rules first they put in the dunk then they stopped calling walking palming the ball carrying the ball and now the college refs are also calling ghetto playground basketball we need a new basketball league where white people again make the rules . Is the given statement hateful?	0	yes	yes	yes	yes	yes	yes	yes	yes	yes	yes	yes	hateful	yes	yes	hateful	yes	yes	non-hateful	hateful	no	yes	yes	non-hateful	yes	hateful	yes	yes	hateful	non-hateful	non-hateful	hateful	yes	hateful	yes	yes	yes	yes	yes	yes	hateful	no	yes	yes	yes	hateful	non-hateful	no	yes
The following statement was labeled non-hateful by 50% annotators: especially since he claims he is a gay man . Is the given statement hateful?	1	non-hateful	non-hateful	non-hateful	non-hateful	non-hateful	non-hateful	non-hateful	non-hateful	non-hateful	non-hateful	non-hateful	non-hateful	non-hateful	non-hateful	non-hateful	non-hateful	non-hateful	no	non-hateful	non-hateful	non-hateful	non-hateful	non-hateful	non-hateful	no	non-hateful	non-hateful	non-hateful	non-hateful	non-hateful	no	non-hateful	non-hateful	non-hateful	no	non-hateful	non-hateful	non-hateful	hateful	non-hateful	no	non-hateful	non-hateful	non-hateful	no	no	non-hateful	non-hateful
The following statement was labeled non-hateful by 50% annotators: bears last lmaoo niggas team tho . Is the given statement hateful?	1	yes	yes	yes	yes	yes	yes	yes	yes	yes	yes	yes	yes	yes	yes	yes	yes	yes	yes	yes	yes	yes	yes	yes	yes	yes	hateful	yes	no	yes	yes	yes	yes	yes	hateful	hateful	no	yes	yes	hateful	yes	yes	yes	hateful	yes	yes	yes	yes	yes
The following statement was labeled non-hateful by 50% annotators: i am not surprised that boris johnson made it to the list but surprised that our <number> inch guy somehow has no sexual harassment complaint against him or have i been sleeping go back modi me too . Is the given statement hateful?	1	no	no	no	no	no	no	no	non-hateful	no	no	no	no	no	no	non-hateful	no	non-hateful	non-hateful	no	no	no	no	no	no	no	no	non-hateful	non-hateful	non-hateful	non-hateful	non-hateful	non-hateful	non-hateful	no	yes	no	non-hateful	non-hateful	hateful	no	non-hateful	yes	no	yes	yes	no	no	non-hateful
The following statement was labeled non-hateful by 50% annotators: <user> yeah while i do not agree with horrible acts of violence angela is taking revenge as a queer person on these horrible bullies especially the pedo carelessly there for shock sure but also early 8 0 was much different rape and revenge movies were still look at as empowering . Is the given statement hateful?	1	non-hateful	non-hateful	non-hateful	non-hateful	non-hateful	non-hateful	non-hateful	non-hateful	non-hateful	non-hateful	non-hateful	non-hateful	non-hateful	no	non-hateful	non-hateful	non-hateful	non-hateful	non-hateful	non-hateful	non-hateful	no	no	yes	non-hateful	non-hateful	non-hateful	non-hateful	no	non-hateful	no	non-hateful	no	no	no	non-hateful	non-hateful	non-hateful	non-hateful	no	non-hateful	non-hateful	no	no	non-hateful	yes	non-hateful	non-hateful
The following statement was labeled non-hateful by 50% annotators: gab is a closed social network it is impossible to see any posts without registering first as such it is good for echo chamber but unusable for propaganda or making any statement this has to change otherwise it ll turn into an information ghetto or reservation for right wingers . Is the given statement hateful?	1	non-hateful	non-hateful	non-hateful	non-hateful	non-hateful	non-hateful	non-hateful	non-hateful	non-hateful	non-hateful	non-hateful	no	no	non-hateful	non-hateful	non-hateful	non-hateful	non-hateful	non-hateful	no	non-hateful	non-hateful	non-hateful	non-hateful	non-hateful	non-hateful	non-hateful	non-hateful	non-hateful	non-hateful	non-hateful	non-hateful	non-hateful	non-hateful	non-hateful	non-hateful	no	non-hateful	non-hateful	non-hateful	no	non-hateful	non-hateful	non-hateful	non-hateful	non-hateful	non-hateful	no
The following statement was labeled non-hateful by 50% annotators: whoever posts the fucking spoilers for endgame is catching these fucking hands . Is the given statement hateful?	1	no	yes	no	no	no	yes	no	no	yes	no	no	no	yes	no	yes	yes	yes	no	no	no	yes	yes	yes	no	no	no	no	no	non-hateful	no	no	no	yes	non-hateful	yes	non-hateful	no	hateful	no	non-hateful	yes	yes	yes	no	no	yes	yes	no
The following statement was labeled non-hateful by 50% annotators: haredi none haredi jews have similar low math scores ashkenazi make up <number> of israel population so nope ashkenazi arent the exception all jews are hybrid mongerels jews are all low i q sand niggers there are no exceptions . Is the given statement hateful?	0	hateful	hateful	hateful	hateful	hateful	hateful	no	hateful	hateful	yes	no	no	no	yes	no	hateful	hateful	hateful	yes	hateful	yes	yes	no	yes	no	no	hateful	hateful	yes	yes	hateful	hateful	yes	yes	yes	hateful	no	yes	yes	yes	hateful	hateful	hateful	yes	no	no	yes	highly hateful
The following statement was labeled non-hateful by 50% annotators: adios nigger lover . Is the given statement hateful?	0	yes	yes	yes	yes	yes	yes	yes	yes	yes	yes	yes	hateful	yes	yes	yes	yes	yes	yes	hateful	yes	yes	yes	yes	yes	yes	hateful	no	yes	yes	yes	yes	no	yes	yes	hateful	yes	yes	no	yes	yes	no	yes	yes	yes	yes	hateful	yes	yes
The following statement was labeled non-hateful by 50% annotators: <user> that ’ pretty gay bro . Is the given statement hateful?	1	non-hateful	non-hateful	non-hateful	non-hateful	non-hateful	non-hateful	non-hateful	non-hateful	non-hateful	non-hateful	non-hateful	non-hateful	non-hateful	non-hateful	non-hateful	non-hateful	non-hateful	non-hateful	no	non-hateful	non-hateful	non-hateful	non-hateful	non-hateful	non-hateful	non-hateful	no	non-hateful	non-hateful	non-hateful	no	non-hateful	hateful	non-hateful	non-hateful	non-hateful	non-hateful	non-hateful	no	non-hateful	anti-gay	non-hateful	non-hateful	non-hateful	non-hateful	non-hateful	no	non-hateful
The following statement was labeled non-hateful by 50% annotators: deport his unfunny fat kike ass back to canadastan make america funny again . Is the given statement hateful?	0	yes	yes	yes	yes	yes	yes	yes	yes	yes	yes	yes	yes	yes	yes	yes	yes	yes	hateful	yes	yes	yes	yes	yes	yes	hateful	hateful	yes	yes	yes	yes	yes	hateful	hateful	yes	yes	hateful	yes	yes	yes	hateful	yes	hateful	yes	hateful	hateful	hateful	yes	yes
The following statement was labeled non-hateful by 50% annotators: white sharia is shit we are not muslims and do not want to be fuck of with that retarded idea . Is the given statement hateful?	0	yes	yes	yes	yes	yes	yes	yes	yes	yes	yes	yes	hateful	yes	yes	yes	yes	no	yes	yes	yes	no	yes	yes	yes	yes	hateful	yes	yes	yes	hateful	hateful	hateful	yes	yes	yes	hateful	no	non-hateful	hateful	yes	yes	hateful	no	hateful	yes	yes	hateful	yes
The following statement was labeled non-hateful by 50% annotators: race is a social construct goy no difference see how beautiful all women are nsfw . Is the given statement hateful?	1	non-hateful	non-hateful	non-hateful	non-hateful	non-hateful	non-hateful	non-hateful	non-hateful	non-hateful	non-hateful	non-hateful	non-hateful	non-hateful	no	non-hateful	non-hateful	no	non-hateful	non-hateful	non-hateful	non-hateful	non-hateful	non-hateful	non-hateful	non-hateful	non-hateful	no	non-hateful	non-hateful	non-hateful	no	non-hateful	non-hateful	non-hateful	no	no	non-hateful	non-hateful	non-hateful	non-hateful	non-hateful	non-hateful	non-hateful	non-hateful	non-hateful	non-hateful	non-hateful	no
The following statement was labeled non-hateful by 50% annotators: <user> and exactly how many of those muslim countries are ready to accept the muslim refugees . Is the given statement hateful?	1	non-hateful	non-hateful	non-hateful	non-hateful	non-hateful	non-hateful	non-hateful	non-hateful	non-hateful	non-hateful	non-hateful	non-hateful	non-hateful	no	no	non-hateful	non-hateful	no	non-hateful	non-hateful	non-hateful	non-hateful	non-hateful	no	non-hateful	non-hateful	non-hateful	no	non-hateful	no	non-hateful	non-hateful	no	no	non-hateful	non-hateful	non-hateful	non-hateful	no	non-hateful	non-hateful	non-hateful	non-hateful	non-hateful	non-hateful	no	non-hateful	no
The following statement was labeled non-hateful by 50% annotators: what a muslim does in the privacy of his own goat is disgusting better not put a picture here try not to imagine one either . Is the given statement hateful?	0	yes	yes	yes	yes	yes	yes	no	yes	yes	yes	yes	no	yes	yes	no	no	yes	yes	no	yes	yes	no	no	yes	yes	yes	hateful	no	no	no	no	no	hateful	non-hateful	hateful	hateful	yes	no	yes	yes	non-hateful	yes	yes	no	yes	yes	non-hateful	hateful
The following statement was labeled non-hateful by 50% annotators: yeah you are filthy little bone smoking kike . Is the given statement hateful?	0	yes	yes	yes	yes	yes	yes	yes	yes	yes	yes	yes	yes	yes	yes	yes	yes	yes	yes	yes	yes	yes	yes	yes	yes	yes	yes	yes	yes	yes	yes	yes	yes	yes	yes	hateful	yes	yes	hateful	hateful	yes	yes	yes	hateful	yes	yes	yes	yes	yes
The following statement was labeled non-hateful by 50% annotators: behind the rohinya muzzie sob story http :// <url> . Is the given statement hateful?	0	non-hateful	non-hateful	non-hateful	non-hateful	non-hateful	non-hateful	non-hateful	non-hateful	non-hateful	non-hateful	non-hateful	non-hateful	non-hateful	non-hateful	non-hateful	non-hateful	non-hateful	non-hateful	no	non-hateful	non-hateful	no	no	non-hateful	non-hateful	non-hateful	non-hateful	non-hateful	non-hateful	non-hateful	non-hateful	yes	no	non-hateful	non-hateful	non-hateful	non-hateful	non-hateful	no	non-hateful	non-hateful	non-hateful	non-hateful	non-hateful	no	non-hateful	non-hateful	no
The following statement was labeled non-hateful by 50% annotators: that is just too retarded even by nigger standards . Is the given statement hateful?	0	yes	yes	yes	yes	yes	yes	yes	yes	yes	yes	yes	yes	yes	yes	yes	yes	yes	yes	yes	yes	yes	yes	hateful	yes	yes	yes	hateful	yes	hateful	yes	yes	yes	yes	yes	yes	yes	yes	yes	yes	yes	yes	yes	hateful	yes	yes	hateful	yes	hateful
The following statement was labeled non-hateful by 50% annotators: i visited in that trip eng irl scotland saw ancient everything they are time itself i think maybe that why i get impatient about how they are allowing the muzzies destroy the place so rich in culture and historic timelessness europe is a living museum and should be respected as such . Is the given statement hateful?	0	no	no	no	no	no	non-hateful	no	yes	no	no	yes	non-hateful	non-hateful	no	non-hateful	non-hateful	no	non-hateful	no	no	yes	no	no	no	no	non-hateful	no	non-hateful	yes	non-hateful	no	hateful	non-hateful	non-hateful	non-hateful	non-hateful	no	non-hateful	yes	hateful	no	no	hateful	yes	hateful	yes	non-hateful	non-hateful
The following statement was labeled non-hateful by 50% annotators: no more of this madness i shall take refugee in a bottle . Is the given statement hateful?	1	non-hateful	non-hateful	non-hateful	non-hateful	no	non-hateful	non-hateful	non-hateful	non-hateful	non-hateful	no	non-hateful	non-hateful	no	non-hateful	non-hateful	no	non-hateful	non-hateful	no	no	non-hateful	no	no	no	no	non-hateful	no	non-hateful	no	non-hateful	non-hateful	no	no	non-hateful	no	no	non-hateful	non-hateful	non-hateful	non-hateful	non-hateful	no	no	non-hateful	no	no	non-hateful
The following statement was labeled non-hateful by 50% annotators: it like <number> <number> points above american whites in japan and south korea tbh but this is what happens when hostile aliens control your country watch out if you are eyeing south korea though since the importation of jungle asians and poo in the loos is occurring on the downlow . Is the given statement hateful?	0	yes	yes	yes	yes	yes	yes	hateful	yes	yes	yes	yes	no	yes	yes	yes	yes	hateful	yes	yes	yes	no	no	non-hateful	yes	no	yes	non-hateful	yes	no	no	no	yes	no	no	no	no	yes	yes	no	yes	hateful	non-hateful	non-hateful	no	no	no	no	hateful
The following statement was labeled non-hateful by 50% annotators: <user> <user> that india one day ll be a muslim country again and muslims ll occupy india and yes we ll give rights to minorities do not worry we ll make india as a muslim country one day . Is the given statement hateful?	1	non-hateful	non-hateful	non-hateful	non-hateful	no	no	non-hateful	non-hateful	non-hateful	no	non-hateful	non-hateful	no	yes	yes	non-hateful	non-hateful	non-hateful	non-hateful	no	non-hateful	no	non-hateful	non-hateful	non-hateful	yes	hateful	yes	yes	non-hateful	yes	yes	hateful	non-hateful	yes	no	no	non-hateful	yes	non-hateful	no	hateful	yes	non-hateful	non-hateful	non-hateful	yes	hateful
The following statement was labeled non-hateful by 50% annotators: niggers dindu and do not do nuffin these apes are beyond just obsolete farm equipment oh and this don lemon monkey is a faggot too <user> . Is the given statement hateful?	0	yes	yes	yes	yes	yes	yes	yes	yes	yes	yes	yes	yes	yes	yes	yes	hateful	yes	yes	yes	yes	yes	yes	yes	yes	yes	yes	yes	yes	yes	yes	yes	yes	yes	hateful	no	yes	yes	hateful	yes	yes	yes	yes	(a).	yes	yes	hateful	hateful	no
The following statement was labeled non-hateful by 50% annotators: the white bitch amber guyger has been locked away . Is the given statement hateful?	1	yes	yes	yes	yes	yes	yes	yes	yes	yes	yes	yes	yes	yes	yes	yes	yes	yes	no	hateful	yes	yes	yes	yes	yes	yes	yes	yes	yes	yes	no	yes	yes	hateful	yes	yes	yes	yes	no	no	no	yes	yes	hateful	yes	no	no	yes	yes
The following statement was labeled non-hateful by 50% annotators: lol gross as fuck seriously dont post that shit i cant stand sand nigger chicks i will have to unfollow if you do . Is the given statement hateful?	0	yes	yes	yes	yes	yes	yes	yes	yes	yes	yes	yes	yes	yes	yes	yes	yes	hateful	yes	hateful	yes	yes	yes	yes	hateful	yes	yes	yes	yes	yes	yes	yes	yes	yes	yes	yes	hateful	yes	yes	yes	yes	hateful	hateful	yes	yes	yes	yes	yes	hateful
The following statement was labeled non-hateful by 50% annotators: fox news is so desperate to change subject they are now talking about how robert de niro got upset waiting for his ride and how full of white privilege he is and oh how he used to be a good actor wow pitiful wtf tucker . Is the given statement hateful?	1	no	non-hateful	no	non-hateful	no	no	non-hateful	no	no	non-hateful	yes	no	non-hateful	no	no	no	no	non-hateful	non-hateful	non-hateful	no	yes	hateful	non-hateful	non-hateful	non-hateful	non-hateful	no	non-hateful	no	non-hateful	no	no	non-hateful	no	no	hateful	no	yes	non-hateful	non-hateful	no	no	non-hateful	non-hateful	no	yes	yes
The following statement was labeled non-hateful by 50% annotators: yeah if you do not support my corrupt multiculti globo homo military run by a corrupt government controlled by jews then you have no balls brilliant . Is the given statement hateful?	0	yes	yes	yes	yes	yes	hateful	yes	yes	yes	yes	yes	yes	hateful	yes	yes	yes	hateful	hateful	yes	yes	yes	yes	yes	yes	yes	yes	yes	hateful	hateful	no	yes	yes	yes	yes	hateful	hateful	yes	yes	hateful	no	no	hateful	yes	yes	yes	hateful	hateful	yes
The following statement was labeled non-hateful by 50% annotators: if it had been a shitskin goatfucker from the mosque do you think they would have arrested him nope . Is the given statement hateful?	0	yes	yes	yes	yes	yes	yes	yes	yes	yes	yes	hateful	yes	yes	yes	yes	hateful	yes	yes	yes	yes	yes	yes	yes	yes	yes	hateful	yes	yes	hateful	yes	yes	yes	yes	yes	yes	yes	no	hateful	hateful	hateful	non-hateful	yes	hateful	yes	yes	yes	non-hateful	yes
The following statement was labeled non-hateful by 50% annotators: the only kike here is you . Is the given statement hateful?	0	no	yes	no	yes	no	no	yes	no	no	non-hateful	no	no	no	non-hateful	no	no	no	no	yes	no	non-hateful	yes	yes	yes	non-hateful	yes	yes	no	yes	yes	hateful	no	no	no	yes	yes	yes	no	no	no	no	no	non-hateful	yes	non-hateful	yes	hateful	yes
The following statement was labeled non-hateful by 50% annotators: black ppl who went to all white schools become annoying ass adults 😂 😂 😂 😂 . Is the given statement hateful?	1	yes	yes	yes	yes	yes	yes	yes	yes	non-hateful	hateful	yes	yes	hateful	yes	hateful	hateful	yes	no	no	hateful	hateful	yes	yes	no	yes	hateful	hateful	yes	hateful	non-hateful	yes	yes	yes	hateful	hateful	yes	no	no	no	hateful	yes	hateful	yes	hateful	hateful	no	hateful	hateful
The following statement was labeled non-hateful by 50% annotators: failed moslem terrorists do not get any virgins just arse raped for eternity by big dindu nuffins with bars of soap they only use for the occasion . Is the given statement hateful?	0	yes	yes	yes	yes	yes	yes	yes	yes	yes	yes	yes	yes	yes	yes	yes	yes	yes	yes	yes	yes	yes	yes	yes	hateful	yes	yes	hateful	yes	hateful	yes	hateful	yes	yes	yes	yes	hateful	yes	hateful	yes	yes	yes	yes	hateful	yes	hateful	yes	no	yes
The following statement was labeled non-hateful by 50% annotators: why do we allow any moslem filth brought here to begin with we have a right as a sovereign nation to disallow anyone we deem unworthy to be an american from coming here . Is the given statement hateful?	0	yes	yes	yes	yes	yes	yes	yes	yes	hateful	hateful	yes	yes	yes	hateful	hateful	non-hateful	yes	yes	yes	non-hateful	yes	yes	yes	yes	non-hateful	yes	yes	hateful	hateful	hateful	yes	yes	non-hateful	yes	yes	yes	yes	hateful	yes	hateful	yes	no	no	non-hateful	yes	yes	hateful	yes
The following statement was labeled non-hateful by 50% annotators: <user> <user> all white men do is lie and colonize nothing else . Is the given statement hateful?	1	hateful	hateful	hateful	hateful	hateful	hateful	hateful	yes	hateful	hateful	hateful	yes	yes	yes	hateful	non-hateful	yes	hateful	no	hateful	yes	non-hateful	hateful	no	hateful	hateful	hateful	yes	yes	no	hateful	hateful	yes	yes	non-hateful	hateful	hateful	hateful	hateful	yes	hateful	hateful	non-hateful	no	hateful	hateful	non-hateful	yes
The following statement was labeled non-hateful by 50% annotators: <user> yeah there all nazis . Is the given statement hateful?	1	non-hateful	non-hateful	non-hateful	non-hateful	non-hateful	non-hateful	non-hateful	no	non-hateful	non-hateful	hateful	no	non-hateful	non-hateful	non-hateful	no	no	non-hateful	non-hateful	yes	non-hateful	no	non-hateful	hateful	no	non-hateful	hateful	no	yes	yes	no	no	yes	no	non-hateful	hateful	yes	yes	non-hateful	non-hateful	non-hateful	no	yes	yes	yes	non-hateful	hateful	non-hateful
The following statement was labeled non-hateful by 50% annotators: <user> except for the illegally part sounds like that is the explanation based on what happens when they go to court where white cops dealing with black people in the us are concerned nothing is illegal . Is the given statement hateful?	1	non-hateful	non-hateful	non-hateful	non-hateful	non-hateful	non-hateful	non-hateful	non-hateful	non-hateful	non-hateful	non-hateful	non-hateful	non-hateful	no	non-hateful	non-hateful	non-hateful	non-hateful	no	non-hateful	no	non-hateful	non-hateful	non-hateful	non-hateful	non-hateful	non-hateful	non-hateful	non-hateful	no	non-hateful	non-hateful	non-hateful	non-hateful	non-hateful	non-hateful	non-hateful	non-hateful	non-hateful	no	non-hateful	no	yes	no	non-hateful	non-hateful	non-hateful	non-hateful
The following statement was labeled non-hateful by 50% annotators: i hate these faggots 🤷 🏾 ‍ ♂️ . Is the given statement hateful?	0	yes	yes	yes	yes	yes	yes	yes	yes	yes	yes	hateful	hateful	yes	yes	yes	yes	yes	yes	yes	yes	yes	yes	yes	yes	hateful	yes	yes	hateful	yes	hateful	hateful	yes	hateful	yes	hateful	yes	no	yes	hateful	yes	yes	yes	hateful	hateful	yes	hateful	hateful	hateful
The following statement was labeled non-hateful by 50% annotators: btw can i just say voting in washington is a fucking dream every state should do this . Is the given statement hateful?	1	non-hateful	non-hateful	non-hateful	non-hateful	non-hateful	non-hateful	non-hateful	non-hateful	non-hateful	non-hateful	non-hateful	non-hateful	non-hateful	non-hateful	non-hateful	no	no	non-hateful	non-hateful	non-hateful	non-hateful	non-hateful	non-hateful	non-hateful	non-hateful	non-hateful	no	non-hateful	non-hateful	non-hateful	no	no	non-hateful	non-hateful	no	no	non-hateful	non-hateful	no	no	non-hateful	non-hateful	no	non-hateful	no	no	non-hateful	non-hateful
The following statement was labeled non-hateful by 50% annotators: it used to be associating with jews meant you had a good accountant or doctor and an extra dinner party to mark on the calendar now it means fbi raids bdsm perversion soiled potted plants and deep state coup attempts how the chosen have fallen . Is the given statement hateful?	1	non-hateful	non-hateful	non-hateful	non-hateful	non-hateful	non-hateful	non-hateful	non-hateful	no	no	no	non-hateful	non-hateful	non-hateful	non-hateful	no	no	non-hateful	no	no	non-hateful	non-hateful	non-hateful	non-hateful	yes	non-hateful	non-hateful	non-hateful	non-hateful	no	non-hateful	yes	no	non-hateful	non-hateful	non-hateful	no	non-hateful	non-hateful	no	non-hateful	hateful	non-hateful	no	yes	hateful	no	yes
The following statement was labeled non-hateful by 50% annotators: <user> <user> i gotta go right there just something about white ass cheeks that drives me crazy . Is the given statement hateful?	1	yes	yes	yes	yes	yes	yes	no	no	non-hateful	yes	no	yes	yes	yes	yes	yes	no	yes	yes	no	yes	yes	no	no	hateful	yes	yes	(a).	yes	no	yes	yes	yes	no	yes	yes	no	yes	no	hateful	hateful	non-hateful	no	no	yes	no	no	yes
The following statement was labeled non-hateful by 50% annotators: the american women in service are waiting for the call to deploy . Is the given statement hateful?	1	non-hateful	non-hateful	non-hateful	non-hateful	non-hateful	non-hateful	non-hateful	non-hateful	non-hateful	non-hateful	non-hateful	non-hateful	non-hateful	non-hateful	non-hateful	non-hateful	non-hateful	non-hateful	non-hateful	non-hateful	no	non-hateful	non-hateful	non-hateful	non-hateful	non-hateful	non-hateful	non-hateful	non-hateful	non-hateful	non-hateful	non-hateful	non-hateful	non-hateful	non-hateful	non-hateful	non-hateful	non-hateful	no	non-hateful	no	non-hateful	non-hateful	non-hateful	non-hateful	no	non-hateful	non-hateful
The following statement was labeled non-hateful by 50% annotators: i think at this point it better to just have a set day like every 1 2 th or something so people do not get confused like how we do with blackout you all really should be taking notes from the niggers . Is the given statement hateful?	0	yes	yes	yes	yes	yes	yes	yes	yes	yes	yes	yes	yes	yes	non-hateful	yes	yes	no	yes	yes	yes	yes	no	yes	yes	hateful	yes	no	yes	yes	no	yes	non-hateful	no	yes	no	no	yes	yes	no	yes	yes	no	hateful	yes	yes	yes	no	yes
The following statement was labeled non-hateful by 50% annotators: makes me want to puke so fucking tired of this moslem shite appeasement . Is the given statement hateful?	0	yes	yes	yes	yes	yes	yes	yes	yes	yes	yes	yes	yes	yes	yes	yes	yes	hateful	hateful	yes	hateful	yes	yes	yes	yes	yes	yes	yes	yes	yes	yes	yes	yes	hateful	hateful	yes	yes	yes	yes	yes	yes	hateful	yes	yes	yes	yes	yes	yes	yes
The following statement was labeled non-hateful by 50% annotators: well it sleeping beauty they plan to rewrite first cause she never gave consent to be kissed by the prince the left are seriously fucked in the head and if the bbc show it i am sure she will be a black moslem like thor was . Is the given statement hateful?	1	yes	yes	yes	yes	yes	yes	yes	yes	yes	yes	yes	yes	yes	yes	no	yes	hateful	yes	yes	no	yes	yes	hateful	yes	yes	no	hateful	yes	no	no	yes	no	no	non-hateful	no	yes	no	yes	no	non-hateful	yes	yes	no	yes	yes	non-hateful	yes	yes
The following statement was labeled non-hateful by 50% annotators: <user> i hate you . Is the given statement hateful?	1	yes	yes	yes	yes	yes	yes	yes	yes	yes	yes	yes	yes	yes	yes	yes	yes	yes	yes	yes	yes	yes	yes	hateful	yes	yes	yes	yes	yes	no	hateful	hateful	yes	yes	yes	yes	yes	yes	yes	yes	yes	no	yes	no	hateful	hateful	yes	yes	yes
The following statement was labeled non-hateful by 50% annotators: lmao this snow nigger is fuming so hard he brought out his ebonics 😂 🤣 😂 🤣 😂 🤣 😂 😂 😂 🤣 😂 🤣 lol this is your future daughters homeboi . Is the given statement hateful?	0	yes	yes	yes	yes	yes	yes	yes	yes	yes	yes	yes	yes	yes	yes	yes	yes	yes	yes	yes	yes	yes	yes	yes	yes	hateful	yes	yes	yes	yes	hateful	hateful	yes	yes	yes	no	yes	hateful	yes	hateful	yes	yes	yes	non-hateful	yes	yes	yes	yes	yes
The following statement was labeled non-hateful by 50% annotators: <user> initially misread this as him wearing a dindu nuffin shirt . Is the given statement hateful?	1	non-hateful	non-hateful	non-hateful	non-hateful	no	non-hateful	non-hateful	no	non-hateful	non-hateful	non-hateful	non-hateful	non-hateful	no	non-hateful	non-hateful	non-hateful	non-hateful	non-hateful	no	non-hateful	non-hateful	no	non-hateful	non-hateful	non-hateful	non-hateful	non-hateful	non-hateful	non-hateful	non-hateful	non-hateful	non-hateful	no	non-hateful	non-hateful	non-hateful	no	no	non-hateful	no	non-hateful	no	no	non-hateful	no	non-hateful	non-hateful
The following statement was labeled non-hateful by 50% annotators: lmao insert some attempt a insult that only works w new right kike worshipping cerno dick sucking gorilla vox pedo faggots . Is the given statement hateful?	0	yes	yes	yes	yes	yes	yes	yes	yes	yes	yes	yes	yes	yes	yes	yes	yes	yes	yes	yes	yes	yes	yes	yes	yes	yes	yes	yes	yes	yes	yes	yes	yes	yes	yes	yes	hateful	yes	yes	yes	yes	a).	yes	yes	yes	hateful	yes	yes	hateful
The following statement was labeled non-hateful by 50% annotators: still the same nigga i am evolving doe . Is the given statement hateful?	1	yes	no	no	yes	yes	yes	yes	yes	yes	yes	yes	yes	yes	no	yes	yes	no	yes	yes	yes	yes	no	yes	yes	yes	yes	yes	hateful	no	yes	no	yes	no	no	yes	hateful	no	yes	yes	yes	no	no	non-hateful	yes	yes	non-hateful	a).	yes
The following statement was labeled non-hateful by 50% annotators: i want to go back to school and get an education but i am poor and colleges are kike rip offs i am not satisfied with where i am in life and honestly have no clue where or how to start pushing forward . Is the given statement hateful?	0	yes	yes	yes	yes	yes	yes	yes	yes	yes	yes	yes	yes	no	yes	yes	yes	no	yes	non-hateful	no	yes	yes	yes	no	yes	yes	no	yes	yes	yes	yes	yes	yes	hateful	non-hateful	yes	yes	non-hateful	no	non-hateful	no	no	yes	no	yes	no	yes	yes
The following statement was labeled non-hateful by 50% annotators: i would repatriate all mongoloid negroids if i had the power at this very moment giving each negroid and mongoloid as many jews as they wanted as slaves as an incentive to leave until all of them were gone . Is the given statement hateful?	0	no	no	no	no	no	no	no	no	non-hateful	no	no	no	yes	no	no	no	no	no	non-hateful	no	no	hateful	no	no	hateful	no	hateful	hateful	no	non-hateful	no	yes	no	no	no	no	no	yes	no	hateful	yes	hateful	no	no	no	non-hateful	no	a).
The following statement was labeled non-hateful by 50% annotators: when i see a nigger bich i do not see a woman i see a turd wit a brillohaid . Is the given statement hateful?	0	yes	yes	yes	yes	yes	yes	yes	yes	yes	yes	yes	yes	yes	yes	yes	yes	yes	yes	yes	yes	yes	yes	hateful	yes	yes	yes	no	hateful	yes	yes	yes	yes	yes	yes	hateful	yes	yes	hateful	yes	yes	yes	no	no	yes	yes	yes	yes	yes
The following statement was labeled non-hateful by 50% annotators: these nigger biches look like aunt jemima . Is the given statement hateful?	0	yes	yes	yes	yes	yes	yes	yes	yes	yes	yes	yes	hateful	yes	yes	hateful	yes	yes	yes	yes	yes	yes	yes	yes	yes	yes	no	hateful	yes	yes	hateful	yes	yes	yes	yes	hateful	yes	no	yes	yes	yes	yes	yes	hateful	yes	yes	yes	no	hateful
The following statement was labeled non-hateful by 50% annotators: acts <number> <number> generation see st luke <time> for if god comes right now immediately he will find that the white devil people are virtually literally spiritually running rampant like loose cannons running helter skelter everywhere like chickens with their heads removed . Is the given statement hateful?	1	no	yes	yes	no	yes	yes	no	yes	no	no	no	no	no	yes	no	non-hateful	yes	no	yes	yes	non-hateful	yes	no	non-hateful	no	no	yes	yes	no	no	no	no	yes	no	no	non-hateful	no	hateful	no	no	yes	yes	no	non-hateful	non-hateful	no	yes	hateful
The following statement was labeled non-hateful by 50% annotators: they either pick the gimmick light skin bitch or the white boy to profit off of and it never works . Is the given statement hateful?	1	yes	yes	yes	yes	yes	yes	hateful	no	yes	yes	no	yes	yes	hateful	yes	yes	no	yes	yes	yes	no	yes	no	yes	hateful	hateful	yes	yes	yes	yes	no	yes	no	yes	yes	yes	yes	yes	hateful	yes	yes	no	hateful	hateful	yes	hateful	yes	no
The following statement was labeled non-hateful by 50% annotators: anything they say is a lie nigger just means black only blax use it becasue whites do not give a fuck about blax they just like controlling whites . Is the given statement hateful?	0	yes	yes	yes	yes	yes	yes	yes	yes	yes	yes	yes	hateful	yes	yes	yes	yes	hateful	yes	yes	yes	yes	yes	yes	hateful	(i)	hateful	hateful	no	yes	yes	no	yes	yes	yes	hateful	yes	yes	hateful	hateful	hateful	yes	hateful	yes	yes	hateful	no	yes	yes
The following statement was labeled non-hateful by 50% annotators: hey yankees can you please stop to associate flamenco with arabs to associate rumba with black music to associate pre colombians with latinos to pretend that africa is in orient to pretend that you are pioneers when you are colons thanks . Is the given statement hateful?	1	no	no	non-hateful	no	no	non-hateful	no	no	no	yes	no	no	no	no	no	no	non-hateful	no	non-hateful	no	no	non-hateful	no	non-hateful	non-hateful	no	non-hateful	non-hateful	no	non-hateful	yes	yes	no	non-hateful	non-hateful	yes	yes	no	no	non-hateful	no	non-hateful	non-hateful	non-hateful	hateful	no	no	non-hateful
The following statement was labeled non-hateful by 50% annotators: <user> completely respectable ladies can enjoy a couple of honky tonks and some beverages nothing wrong with that <wink> . Is the given statement hateful?	1	non-hateful	non-hateful	non-hateful	non-hateful	non-hateful	non-hateful	non-hateful	non-hateful	non-hateful	non-hateful	non-hateful	non-hateful	non-hateful	non-hateful	non-hateful	non-hateful	non-hateful	no	no	non-hateful	non-hateful	non-hateful	non-hateful	no	non-hateful	no	non-hateful	non-hateful	non-hateful	non-hateful	non-hateful	non-hateful	non-hateful	non-hateful	no	non-hateful	non-hateful	no	non-hateful	non-hateful	non-hateful	non-hateful	non-hateful	non-hateful	no	non-hateful	no	non-hateful
The following statement was labeled non-hateful by 50% annotators: <user> <user> everybody knows that the demo bot plan in <number> is massive illegal alien voter fraud operation too big to recount 2020 and that the mcimpeachment is just intended to make the illegal aliens mcangry enough to mcvote jedi mind trick no workee oops . Is the given statement hateful?	1	no	no	yes	yes	no	no	no	no	no	no	no	no	no	no	non-hateful	no	no	no	non-hateful	no	no	no	no	non-hateful	no	no	no	no	no	yes	non-hateful	yes	no	no	yes	yes	yes	no	no	no	no	(a).	non-hateful	yes	yes	yes	no	no
The following statement was labeled non-hateful by 50% annotators: seen some niggas walking outside smoking a hookah they some fiens . Is the given statement hateful?	1	yes	yes	yes	yes	yes	yes	yes	yes	yes	yes	yes	yes	yes	yes	hateful	yes	hateful	yes	yes	no	yes	yes	yes	no	yes	no	no	yes	yes	yes	yes	yes	yes	no	yes	yes	yes	no	no	no	yes	hateful	yes	no	yes	yes	yes	hateful
The following statement was labeled non-hateful by 50% annotators: long dead redneck friend of mine when discussing basketball said i have never seen a nigger run so fast unless he had a tv under each arm . Is the given statement hateful?	0	yes	yes	yes	yes	yes	yes	yes	yes	yes	yes	yes	yes	no	yes	yes	yes	yes	yes	yes	yes	yes	yes	no	yes	yes	yes	yes	yes	yes	hateful	yes	hateful	hateful	yes	yes	yes	no	hateful	yes	yes	yes	hateful	yes	non-hateful	yes	yes	yes	no
The following statement was labeled non-hateful by 50% annotators: can not stop thinking about the gay rats from arthur i hope they had a good honeymoon . Is the given statement hateful?	1	non-hateful	non-hateful	non-hateful	non-hateful	non-hateful	non-hateful	non-hateful	non-hateful	non-hateful	no	no	no	non-hateful	no	no	non-hateful	non-hateful	non-hateful	non-hateful	no	no	non-hateful	non-hateful	non-hateful	non-hateful	no	non-hateful	non-hateful	no	non-hateful	non-hateful	non-hateful	no	non-hateful	no	no	no	no	non-hateful	no	no	no	no	no	no	yes	no	no
The following statement was labeled non-hateful by 50% annotators: joe biden own words are proof that the left resorts to violence when they do not like something said by others that the tolerant left for you from a legal standpoint nonthreatening words are never justification for assault battery . Is the given statement hateful?	1	non-hateful	non-hateful	non-hateful	non-hateful	non-hateful	non-hateful	non-hateful	non-hateful	non-hateful	non-hateful	non-hateful	non-hateful	non-hateful	non-hateful	non-hateful	non-hateful	non-hateful	non-hateful	non-hateful	non-hateful	no	non-hateful	no	no	non-hateful	non-hateful	non-hateful	non-hateful	no	non-hateful	yes	non-hateful	non-hateful	non-hateful	non-hateful	no	no	no	non-hateful	non-hateful	no	non-hateful	b).	non-hateful	non-hateful	no	non-hateful	no
The following statement was labeled non-hateful by 50% annotators: <user> they robbed them while serving looks too and they robbed the brooklyn museum tbh more shows should be about queer people stealing from white cishet institutions . Is the given statement hateful?	1	non-hateful	non-hateful	non-hateful	non-hateful	no	non-hateful	non-hateful	non-hateful	non-hateful	non-hateful	no	non-hateful	non-hateful	non-hateful	no	non-hateful	non-hateful	no	non-hateful	no	non-hateful	no	hateful	no	non-hateful	non-hateful	non-hateful	non-hateful	no	no	no	yes	non-hateful	yes	non-hateful	no	non-hateful	no	no	no	non-hateful	non-hateful	non-hateful	no	non-hateful	non-hateful	non-hateful	yes
The following statement was labeled non-hateful by 50% annotators: again why are you so defensive about it is some nazi gonna come in and call you a name so what i have been called nigger more times than i can count . Is the given statement hateful?	1	yes	no	yes	yes	yes	no	non-hateful	yes	yes	yes	no	yes	yes	no	yes	no	no	no	no	no	yes	non-hateful	yes	yes	non-hateful	non-hateful	no	no	yes	non-hateful	no	hateful	yes	no	yes	yes	yes	no	non-hateful	yes	yes	yes	hateful	yes	no	yes	yes	yes
The following statement was labeled non-hateful by 50% annotators: goodnight nigger lover lover . Is the given statement hateful?	0	yes	yes	yes	no	yes	yes	yes	yes	yes	yes	no	yes	yes	yes	yes	yes	no	non-hateful	yes	no	yes	yes	yes	no	yes	hateful	no	no	yes	yes	yes	yes	yes	yes	no	no	yes	hateful	yes	no	no	no	no	yes	yes	yes	no	no
The following statement was labeled non-hateful by 50% annotators: wait other single people exist you mean not every gay person is taken 😱 . Is the given statement hateful?	1	non-hateful	non-hateful	non-hateful	non-hateful	non-hateful	non-hateful	non-hateful	non-hateful	non-hateful	non-hateful	no	non-hateful	non-hateful	non-hateful	non-hateful	non-hateful	non-hateful	non-hateful	non-hateful	non-hateful	non-hateful	non-hateful	non-hateful	non-hateful	non-hateful	non-hateful	non-hateful	non-hateful	non-hateful	non-hateful	non-hateful	non-hateful	non-hateful	non-hateful	non-hateful	non-hateful	no	non-hateful	non-hateful	non-hateful	no	non-hateful	non-hateful	non-hateful	non-hateful	non-hateful	non-hateful	non-hateful
The following statement was labeled non-hateful by 50% annotators: they are called liberals and we are called nazis by the msm mediacrats misapplication of terms began in 1 9 6 0 during vnw weathermen underground communists bill ayers and his bitch bernadine dohrn who schooled frank marshall davis son obama fathered with a mudshark porn hoe . Is the given statement hateful?	0	yes	yes	yes	yes	yes	yes	yes	yes	yes	yes	yes	yes	yes	yes	yes	yes	yes	yes	hateful	yes	yes	no	yes	hateful	no	yes	hateful	no	no	yes	yes	yes	no	yes	yes	non-hateful	hateful	yes	non-hateful	hateful	non-hateful	yes	yes	yes	no	no	yes	no
The following statement was labeled non-hateful by 50% annotators: i want to jimmy kimmel to do one of those ate kids halloween candy videos but instead of halloween candy challenge suburban white parents to call <number> black kids that knock on their door niggers . Is the given statement hateful?	0	yes	yes	yes	yes	yes	yes	hateful	yes	yes	yes	yes	hateful	non-hateful	yes	yes	yes	yes	hateful	yes	yes	no	yes	no	yes	yes	yes	yes	yes	yes	hateful	yes	yes	hateful	yes	hateful	yes	yes	no	no	yes	non-hateful	yes	yes	hateful	yes	hateful	hateful	no
The following statement was labeled non-hateful by 50% annotators: definition from fr muslim this from persian mosolmān or moslemān pl of moslem and this of the ar clás muslim <number> adj who professes islamism ‖ religion of muhammad u t c <number> adj . Is the given statement hateful?	1	non-hateful	no	no	non-hateful	no	non-hateful	non-hateful	no	non-hateful	no	no	no	no	non-hateful	non-hateful	no	no	non-hateful	non-hateful	non-hateful	non-hateful	non-hateful	no	no	non-hateful	non-hateful	no	no	no	non-hateful	no	no	no	no	no	non-hateful	no	no	no	no	non-hateful	no	no	non-hateful	non-hateful	non-hateful	non-hateful	non-hateful
The following statement was labeled non-hateful by 50% annotators: <user> soo like is she a nazi . Is the given statement hateful?	1	non-hateful	non-hateful	non-hateful	non-hateful	non-hateful	non-hateful	non-hateful	non-hateful	no	non-hateful	non-hateful	no	non-hateful	yes	non-hateful	non-hateful	no	non-hateful	non-hateful	no	non-hateful	non-hateful	non-hateful	no	non-hateful	non-hateful	non-hateful	no	non-hateful	no	no	non-hateful	non-hateful	non-hateful	non-hateful	no	non-hateful	non-hateful	non-hateful	yes	no	no	no	no	no	non-hateful	non-hateful	no
The following statement was labeled non-hateful by 50% annotators: hugs each amp every akkian out there maa hod di salgay fans ki sonagachi ki item salman . Is the given statement hateful?	1	non-hateful	non-hateful	non-hateful	non-hateful	non-hateful	non-hateful	non-hateful	non-hateful	non-hateful	non-hateful	non-hateful	no	non-hateful	non-hateful	non-hateful	non-hateful	non-hateful	non-hateful	non-hateful	non-hateful	non-hateful	no	non-hateful	no	non-hateful	non-hateful	no	non-hateful	non-hateful	no	no	non-hateful	no	non-hateful	non-hateful	non-hateful	non-hateful	non-hateful	non-hateful	non-hateful	non-hateful	non-hateful	non-hateful	non-hateful	no	non-hateful	no	non-hateful
The following statement was labeled non-hateful by 50% annotators: me saying that i will partake in inktober is a fucking lie i do not have the time focus or energy sometimes so i will doodle some bullshit and maybe make them into full drawings . Is the given statement hateful?	1	no	no	no	no	no	no	no	no	no	no	no	no	no	no	no	no	no	no	no	no	no	no	no	no	non-hateful	no	no	no	no	non-hateful	no	no	no	no	no	no	no	no	no	no	no	non-hateful	yes	no	no	non-hateful	no	no
The following statement was labeled non-hateful by 50% annotators: kikes are the real problem pay all refugees and muslims to leave for uk and france . Is the given statement hateful?	0	hateful	hateful	hateful	hateful	hateful	hateful	hateful	yes	hateful	hateful	yes	hateful	hateful	hateful	hateful	hateful	hateful	hateful	hateful	hateful	hateful	non-hateful	hateful	hateful	yes	yes	yes	hateful	yes	yes	yes	yes	yes	yes	yes	yes	hateful	yes	yes	hateful	yes	yes	no	hateful	hateful	hateful	yes	no
The following statement was labeled non-hateful by 50% annotators: that nigga ynw melly never getting released . Is the given statement hateful?	1	yes	yes	yes	yes	yes	yes	yes	yes	yes	yes	yes	yes	yes	yes	no	yes	yes	yes	yes	hateful	yes	yes	yes	yes	yes	a).	yes	yes	yes	yes	yes	yes	hateful	yes	no	yes	yes	no	yes	yes	yes	yes	yes	yes	yes	hateful	yes	yes
The following statement was labeled non-hateful by 50% annotators: <user> <user> <user> not we love america and tanding tall with straight spines unlike the maga who defend treason corruption dictatorship cover ups murder white supremacy misogyny racism homophobia and the list goes on good always wins in the end . Is the given statement hateful?	1	yes	yes	yes	yes	yes	no	no	no	yes	no	yes	non-hateful	no	non-hateful	no	yes	no	non-hateful	no	no	no	non-hateful	yes	no	yes	no	non-hateful	hateful	yes	yes	no	yes	no	no	no	yes	no	non-hateful	hateful	no	non-hateful	no	yes	non-hateful	no	non-hateful	yes	no
The following statement was labeled non-hateful by 50% annotators: <user> just the jews you fucking kike . Is the given statement hateful?	0	yes	yes	yes	yes	yes	yes	yes	yes	yes	yes	yes	yes	yes	yes	yes	yes	yes	yes	yes	yes	yes	yes	yes	yes	yes	hateful	yes	yes	yes	yes	yes	yes	yes	hateful	yes	hateful	yes	yes	yes	yes	yes	yes	yes	yes	hateful	so	hateful	yes
The following statement was labeled non-hateful by 50% annotators: is muhummad muslim or islam . Is the given statement hateful?	1	non-hateful	non-hateful	non-hateful	non-hateful	non-hateful	non-hateful	non-hateful	non-hateful	non-hateful	no	non-hateful	no	non-hateful	no	non-hateful	non-hateful	non-hateful	non-hateful	non-hateful	non-hateful	non-hateful	non-hateful	no	non-hateful	non-hateful	non-hateful	no	no	no	non-hateful	non-hateful	no	non-hateful	non-hateful	no	no	non-hateful	no	non-hateful	non-hateful	no	non-hateful	non-hateful	non-hateful	non-hateful	non-hateful	non-hateful	non-hateful
The following statement was labeled non-hateful by 50% annotators: <user> fuck you and die you fuckin lezzie nigger white hating cunt . Is the given statement hateful?	0	yes	yes	yes	yes	yes	yes	yes	yes	yes	yes	yes	yes	yes	yes	yes	yes	yes	yes	yes	yes	yes	yes	yes	hateful	yes	yes	yes	yes	yes	yes	yes	yes	hateful	yes	yes	yes	yes	yes	yes	yes	yes	yes	yes	yes	yes	hateful	yes	yes
The following statement was labeled non-hateful by 50% annotators: <user> <user> <user> they are the best man the ultimate muslim shoe white ones are doubly good reflective ones triply . Is the given statement hateful?	1	non-hateful	non-hateful	non-hateful	non-hateful	no	non-hateful	non-hateful	non-hateful	non-hateful	non-hateful	non-hateful	non-hateful	non-hateful	non-hateful	non-hateful	non-hateful	no	no	no	non-hateful	non-hateful	no	non-hateful	non-hateful	no	non-hateful	no	non-hateful	no	no	non-hateful	no	non-hateful	non-hateful	no	non-hateful	non-hateful	no	no	non-hateful	non-hateful	non-hateful	non-hateful	non-hateful	no	non-hateful	non-hateful	non-hateful
The following statement was labeled non-hateful by 50% annotators: my grandson a homosexual and i love him i love my big gay grandson . Is the given statement hateful?	1	non-hateful	non-hateful	non-hateful	non-hateful	non-hateful	non-hateful	non-hateful	non-hateful	non-hateful	non-hateful	non-hateful	non-hateful	non-hateful	non-hateful	non-hateful	non-hateful	non-hateful	non-hateful	non-hateful	non-hateful	non-hateful	non-hateful	non-hateful	non-hateful	non-hateful	non-hateful	non-hateful	no	non-hateful	non-hateful	non-hateful	non-hateful	non-hateful	non-hateful	non-hateful	non-hateful	non-hateful	non-hateful	non-hateful	non-hateful	non-hateful	non-hateful	no	non-hateful	non-hateful	non-hateful	no	no
The following statement was labeled non-hateful by 50% annotators: <user> i d be interested in the role of ship queer if it still going is homosexuality essential though i have never been one although i have transferable skills . Is the given statement hateful?	1	non-hateful	non-hateful	non-hateful	non-hateful	non-hateful	non-hateful	no	non-hateful	non-hateful	no	non-hateful	non-hateful	non-hateful	non-hateful	non-hateful	non-hateful	non-hateful	non-hateful	non-hateful	non-hateful	no	non-hateful	non-hateful	non-hateful	non-hateful	non-hateful	non-hateful	non-hateful	non-hateful	no	non-hateful	non-hateful	non-hateful	no	non-hateful	non-hateful	non-hateful	non-hateful	non-hateful	non-hateful	non-hateful	no	non-hateful	no	no	non-hateful	no	non-hateful
The following statement was labeled non-hateful by 50% annotators: no do not lie these shithole are great places for niggers and spics and arabs to live they all will be happy together without wypipo . Is the given statement hateful?	0	yes	yes	yes	yes	yes	yes	hateful	yes	yes	yes	hateful	hateful	yes	yes	yes	yes	yes	yes	yes	yes	yes	yes	yes	yes	yes	yes	yes	yes	yes	yes	yes	no	hateful	yes	yes	yes	yes	yes	yes	hateful	yes	yes	yes	hateful	hateful	no	hateful	no
The following statement was labeled non-hateful by 50% annotators: everyone wants to be nct everyone the entirety of kpop if they dont wanna be niggers they wanna be nct . Is the given statement hateful?	0	yes	yes	yes	yes	yes	yes	yes	yes	yes	yes	hateful	yes	yes	yes	yes	yes	hateful	yes	yes	hateful	yes	yes	yes	yes	non-hateful	yes	yes	yes	yes	hateful	yes	yes	non-hateful	hateful	yes	non-hateful	non-hateful	no	yes	no	no	hateful	no	no	yes	yes	yes	hateful
The following statement was labeled non-hateful by 50% annotators: my personal emotion fueled opinion is if you see a sexual assault on campus knock them out professionally i say make sure you do what you can to make sure you do what you can to make sure these creeps are identifiable because violence only begets violence . Is the given statement hateful?	1	non-hateful	no	no	non-hateful	non-hateful	non-hateful	no	no	non-hateful	non-hateful	non-hateful	non-hateful	no	non-hateful	non-hateful	non-hateful	no	non-hateful	no	no	non-hateful	no	no	non-hateful	non-hateful	no	non-hateful	non-hateful	no	non-hateful	no	non-hateful	no	no	non-hateful	non-hateful	no	no	no	no	no	non-hateful	non-hateful	non-hateful	non-hateful	non-hateful	no	non-hateful
The following statement was labeled non-hateful by 50% annotators: theresa may treason has no limit as she appoints sajid javid home sec in charge of uk security police immigration a moslem of pakistani origin civil war seems to be the only route . Is the given statement hateful?	1	no	no	non-hateful	no	no	no	no	no	no	non-hateful	no	no	no	yes	no	no	non-hateful	no	non-hateful	non-hateful	non-hateful	no	no	hateful	non-hateful	yes	non-hateful	yes	no	no	no	no	non-hateful	non-hateful	no	hateful	no	no	yes	ii.	non-hateful	no	no	hateful	yes	yes	non-hateful	i.
The following statement was labeled non-hateful by 50% annotators: did i say soley you disingenuous kike rat i said <percent> and it would be better without your <percent> plus the other former <percent> thanks kikes for crankung rhat up to <percent> . Is the given statement hateful?	0	yes	yes	yes	yes	yes	yes	yes	yes	yes	yes	yes	yes	yes	yes	yes	yes	yes	yes	yes	yes	yes	yes	yes	yes	yes	yes	yes	yes	yes	yes	yes	yes	yes	no	non-hateful	yes	yes	yes	no	yes	yes	yes	yes	yes	yes	hateful	no	yes
The following statement was labeled non-hateful by 50% annotators: u notice people like <user> are not too eager at exploring or talk abt the jewish and israeli connections the evidence for which there is plenty dancing israelis truck bomb jews urban moving systems jews suter wtc lease ring jews gelatine art students etc etc just arabs arabs arabs . Is the given statement hateful?	0	no	no	no	no	no	no	no	non-hateful	no	non-hateful	non-hateful	no	non-hateful	no	no	no	no	non-hateful	no	no	non-hateful	no	yes	no	no	hateful	yes	yes	no	hateful	non-hateful	no	no	non-hateful	non-hateful	yes	hateful	no	yes	no	non-hateful	no	non-hateful	no	no	yes	no	no
The following statement was labeled non-hateful by 50% annotators: <user> the edmund fitzgerald leaves for canada tomorrow morning all muzzies are welcome and it is free . Is the given statement hateful?	0	non-hateful	non-hateful	no	non-hateful	non-hateful	non-hateful	no	non-hateful	non-hateful	non-hateful	non-hateful	no	non-hateful	no	non-hateful	non-hateful	no	non-hateful	no	no	no	non-hateful	non-hateful	non-hateful	non-hateful	non-hateful	no	non-hateful	non-hateful	non-hateful	yes	no	non-hateful	non-hateful	non-hateful	non-hateful	non-hateful	no	non-hateful	no	no	no	yes	non-hateful	non-hateful	non-hateful	no	non-hateful
The following statement was labeled non-hateful by 50% annotators: as long as you gettin money yo bitch don ’ t care if you don ’ t go out . Is the given statement hateful?	1	yes	yes	yes	yes	yes	yes	yes	yes	yes	yes	yes	yes	yes	yes	yes	yes	hateful	yes	yes	yes	yes	yes	yes	yes	yes	no	hateful	hateful	yes	hateful	hateful	no	yes	yes	yes	no	yes	yes	yes	yes	yes	hateful	yes	yes	yes	hateful	yes	yes
The following statement was labeled non-hateful by 50% annotators: that towel head is a dude i am almost sure i just threw up in my mouth a little . Is the given statement hateful?	0	yes	yes	yes	no	yes	yes	yes	yes	yes	hateful	no	yes	no	yes	yes	yes	yes	yes	yes	non-hateful	yes	hateful	hateful	non-hateful	hateful	yes	hateful	yes	no	hateful	no	non-hateful	no	hateful	no	no	non-hateful	no	non-hateful	yes	no	yes	non-hateful	yes	yes	yes	non-hateful	no
The following statement was labeled non-hateful by 50% annotators: imagine if there wasn t oil in the middle east there would be no dubais there would be no wealthy towel headed sand nigger ruling class because of oil muslim goat fckrs oops i meant herders get to hide in plain sight now they intend to take over the u.s. . Is the given statement hateful?	0	yes	yes	yes	yes	yes	yes	yes	yes	yes	yes	yes	yes	hateful	hateful	hateful	yes	hateful	yes	yes	hateful	yes	yes	hateful	yes	yes	yes	yes	yes	hateful	yes	yes	yes	yes	yes	hateful	hateful	yes	yes	yes	yes	hateful	yes	yes	yes	yes	hateful	hateful	hateful
The following statement was labeled non-hateful by 50% annotators: fakenews is following hillary example blame everyone else for causing the violence even though they say kill and fight in their articles bye bye fake guys . Is the given statement hateful?	1	no	no	no	no	no	non-hateful	no	non-hateful	no	no	non-hateful	non-hateful	non-hateful	non-hateful	non-hateful	non-hateful	no	non-hateful	yes	non-hateful	non-hateful	no	non-hateful	non-hateful	no	yes	no	yes	no	non-hateful	non-hateful	no	no	yes	non-hateful	non-hateful	non-hateful	no	non-hateful	no	non-hateful	no	no	non-hateful	no	yes	no	no
The following statement was labeled non-hateful by 50% annotators: this is a fucking wild night this is why i hate having adrenaline rushes haldhladslas . Is the given statement hateful?	1	no	no	no	no	no	no	no	non-hateful	no	no	no	no	no	no	no	no	no	yes	no	no	no	no	yes	yes	no	yes	no	non-hateful	yes	no	no	no	yes	non-hateful	no	no	non-hateful	yes	yes	no	non-hateful	yes	no	no	no	non-hateful	non-hateful	no
The following statement was labeled non-hateful by 50% annotators: i bet overtly was invented by jews 🖕 😡 🖕 . Is the given statement hateful?	1	non-hateful	non-hateful	non-hateful	non-hateful	non-hateful	non-hateful	non-hateful	non-hateful	non-hateful	non-hateful	no	no	non-hateful	non-hateful	no	no	non-hateful	non-hateful	non-hateful	no	non-hateful	no	non-hateful	non-hateful	no	non-hateful	non-hateful	no	non-hateful	non-hateful	no	yes	no	non-hateful	non-hateful	non-hateful	non-hateful	non-hateful	non-hateful	yes	non-hateful	no	no	non-hateful	non-hateful	no	non-hateful	non-hateful
The following statement was labeled non-hateful by 50% annotators: interesting stuff i will not lie with all the current talk of some blacks wanting to re segregate it hard to argue against most people think a militia enforced instant segregation when they hear the term white nationalism and that enforcement with violence is what scares them . Is the given statement hateful?	1	non-hateful	non-hateful	non-hateful	non-hateful	non-hateful	non-hateful	non-hateful	non-hateful	non-hateful	non-hateful	non-hateful	non-hateful	non-hateful	non-hateful	non-hateful	non-hateful	non-hateful	non-hateful	non-hateful	non-hateful	non-hateful	non-hateful	non-hateful	non-hateful	non-hateful	non-hateful	no	non-hateful	non-hateful	no	non-hateful	non-hateful	non-hateful	non-hateful	non-hateful	no	non-hateful	non-hateful	non-hateful	non-hateful	non-hateful	non-hateful	non-hateful	non-hateful	non-hateful	non-hateful	no	non-hateful
The following statement was labeled non-hateful by 50% annotators: no but mestizo spic sure is . Is the given statement hateful?	0	no	no	no	no	no	no	no	no	no	no	no	no	no	no	no	no	no	no	no	no	no	no	no	no	no	no	no	non-hateful	non-hateful	no	no	no	no	no	no	no	yes	no	no	no	no	no	no	no	non-hateful	non-hateful	non-hateful	yes
The following statement was labeled non-hateful by 50% annotators: why are only white nations being invaded buy non white immigrants . Is the given statement hateful?	1	non-hateful	non-hateful	non-hateful	non-hateful	no	non-hateful	no	non-hateful	non-hateful	non-hateful	non-hateful	no	no	yes	non-hateful	no	yes	no	non-hateful	no	yes	hateful	non-hateful	non-hateful	non-hateful	no	yes	no	no	hateful	non-hateful	yes	non-hateful	yes	non-hateful	non-hateful	non-hateful	hateful	non-hateful	no	yes	no	hateful	hateful	hateful	non-hateful	yes	no
The following statement was labeled non-hateful by 50% annotators: that his sister sheboon friend melissa is apparently dating some blonde dude . Is the given statement hateful?	0	non-hateful	non-hateful	non-hateful	non-hateful	non-hateful	non-hateful	non-hateful	non-hateful	non-hateful	no	non-hateful	no	non-hateful	non-hateful	non-hateful	no	non-hateful	non-hateful	no	non-hateful	non-hateful	non-hateful	non-hateful	non-hateful	non-hateful	non-hateful	no	non-hateful	non-hateful	non-hateful	non-hateful	non-hateful	yes	no	non-hateful	non-hateful	no	no	non-hateful	non-hateful	no	non-hateful	no	non-hateful	no	no	no	non-hateful
The following statement was labeled non-hateful by 50% annotators: in the <number> <number> zipper head and slope were pretty fashionable i do believe they covered the gambit of asians . Is the given statement hateful?	1	non-hateful	non-hateful	no	non-hateful	non-hateful	non-hateful	no	non-hateful	non-hateful	no	non-hateful	no	non-hateful	non-hateful	no	non-hateful	no	non-hateful	no	no	non-hateful	no	non-hateful	non-hateful	no	no	no	non-hateful	non-hateful	no	non-hateful	non-hateful	no	no	no	non-hateful	non-hateful	non-hateful	non-hateful	non-hateful	non-hateful	no	non-hateful	no	yes	non-hateful	no	no
The following statement was labeled non-hateful by 50% annotators: have been suspended four times by twitter always when content said something re moslems but truth also seeing that second largest shareholder is a moslem prince alwaleed bin talal bin abdulaziz alsaud not surprising so have drifted into gab ai for a better time and no moslem appeasement hope . Is the given statement hateful?	1	non-hateful	non-hateful	no	non-hateful	non-hateful	non-hateful	no	no	non-hateful	no	non-hateful	non-hateful	no	non-hateful	no	non-hateful	non-hateful	non-hateful	no	no	non-hateful	no	non-hateful	no	no	no	non-hateful	no	no	no	non-hateful	no	no	no	non-hateful	non-hateful	no	no	no	non-hateful	non-hateful	non-hateful	no	yes	non-hateful	no	non-hateful	no
The following statement was labeled non-hateful by 50% annotators: incredible how asians have been turning to shitlib ideologies they are traditionally bulwarks of confucian law order disgusting they should be executed . Is the given statement hateful?	0	yes	yes	yes	yes	yes	yes	yes	yes	yes	yes	hateful	yes	hateful	yes	non-hateful	yes	yes	hateful	yes	yes	hateful	hateful	yes	yes	yes	hateful	yes	hateful	hateful	hateful	yes	hateful	hateful	hateful	hateful	yes	non-hateful	non-hateful	non-hateful	hateful	hateful	hateful	hateful	yes	hateful	hateful	yes	hateful
The following statement was labeled non-hateful by 50% annotators: if i remember correctly your only concern was how to find naked pictures of the women in the picture i am sure by that comment your a real genius . Is the given statement hateful?	1	non-hateful	no	no	non-hateful	no	no	no	non-hateful	no	non-hateful	non-hateful	no	no	non-hateful	non-hateful	non-hateful	non-hateful	no	no	non-hateful	non-hateful	non-hateful	non-hateful	non-hateful	non-hateful	no	no	no	non-hateful	no	non-hateful	non-hateful	non-hateful	no	non-hateful	no	yes	non-hateful	yes	non-hateful	non-hateful	no	no	no	non-hateful	no	non-hateful	non-hateful
The following statement was labeled non-hateful by 50% annotators: you guys in germany and us men here in america too we are gonna have to man up and be crusaders this musloid bullshit is totally unacceptable . Is the given statement hateful?	0	yes	yes	yes	yes	yes	yes	yes	yes	yes	yes	yes	yes	yes	yes	yes	yes	yes	yes	yes	hateful	yes	yes	yes	yes	yes	yes	yes	yes	hateful	yes	no	no	yes	yes	yes	hateful	yes	yes	yes	yes	yes	yes	yes	yes	yes	yes	hateful	yes
The following statement was labeled non-hateful by 50% annotators: that poor guy fucking mixer nigger grand kids that as bad as that fucking moron trump with his mixer jew grand kids . Is the given statement hateful?	0	yes	yes	yes	yes	yes	yes	yes	yes	yes	yes	yes	yes	yes	yes	yes	yes	yes	yes	yes	yes	hateful	yes	hateful	yes	hateful	yes	yes	hateful	yes	yes	hateful	yes	hateful	hateful	yes	no	yes	yes	yes	yes	yes	yes	yes	hateful	yes	hateful	yes	hateful
The following statement was labeled non-hateful by 50% annotators: my family owned <number> but we also fought for the union i really wish they would make a real proposal for reparations at some point i would not be able to contain myself if once everything was calculated every nigger got like <money> 😂 . Is the given statement hateful?	0	no	no	no	no	yes	yes	no	non-hateful	no	no	hateful	yes	no	no	yes	no	yes	non-hateful	no	no	yes	yes	no	yes	yes	yes	no	no	yes	no	hateful	no	no	no	non-hateful	non-hateful	yes	non-hateful	yes	yes	yes	non-hateful	hateful	no	no	no	non-hateful	non-hateful
The following statement was labeled non-hateful by 50% annotators: despite living in the same american neighborhood for decades i somehow managed to move to a muslim country i base this on having gone food shopping today in a store over run with hijab clad terrorists . Is the given statement hateful?	0	no	no	yes	yes	no	non-hateful	no	non-hateful	no	non-hateful	no	no	no	no	yes	non-hateful	no	yes	non-hateful	non-hateful	no	non-hateful	hateful	non-hateful	non-hateful	no	no	yes	yes	no	hateful	no	yes	no	non-hateful	hateful	non-hateful	hateful	no	hateful	hateful	no	non-hateful	no	non-hateful	non-hateful	no	no
The following statement was labeled non-hateful by 50% annotators: four moslem mp have been sent suspicious packages their acting like its something to worry about they need to chill out its just parcel parcel of life in a multicultural shit hole i am sure mayor khan would agree inshallah . Is the given statement hateful?	1	yes	yes	yes	yes	yes	yes	yes	yes	yes	yes	hateful	no	no	yes	yes	no	yes	no	yes	hateful	no	yes	no	yes	yes	hateful	yes	yes	hateful	yes	non-hateful	yes	yes	yes	yes	no	hateful	hateful	no	yes	hateful	yes	non-hateful	hateful	no	hateful	yes	yes
The following statement was labeled non-hateful by 50% annotators: ass in the air lodi take every inch of depravity your masters want to give you take it all ya lil faggot btw the 1 st amendment applies to everyone not just thin skinned boomer queers and leftists you do not like gab 🐸 gtfo . Is the given statement hateful?	0	yes	yes	yes	yes	yes	yes	yes	yes	yes	yes	yes	yes	yes	yes	yes	yes	yes	yes	yes	yes	yes	yes	yes	yes	yes	yes	yes	yes	yes	yes	yes	yes	yes	yes	yes	yes	yes	yes	yes	hateful	yes	hateful	hateful	yes	yes	yes	yes	yes
The following statement was labeled non-hateful by 50% annotators: <user> nigger nigger nigger . Is the given statement hateful?	0	yes	yes	yes	yes	yes	yes	yes	yes	yes	yes	yes	yes	yes	yes	yes	yes	yes	yes	yes	yes	yes	yes	yes	yes	yes	hateful	hateful	yes	yes	yes	yes	hateful	yes	yes	yes	yes	hateful	yes	yes	yes	yes	yes	yes	yes	yes	yes	yes	yes
The following statement was labeled non-hateful by 50% annotators: <user> should have been removed the last time he threatened this but making laws against people brown people black people gay people female people sick people poor people homeless people refugee people is more important than protecting our democracy of the people <user> . Is the given statement hateful?	1	non-hateful	non-hateful	yes	non-hateful	no	non-hateful	no	non-hateful	non-hateful	yes	yes	no	non-hateful	non-hateful	no	no	no	hateful	non-hateful	non-hateful	yes	no	yes	non-hateful	no	yes	yes	non-hateful	no	no	non-hateful	no	yes	non-hateful	non-hateful	no	no	non-hateful	non-hateful	yes	non-hateful	no	yes	yes	no	non-hateful	non-hateful	hateful
The following statement was labeled non-hateful by 50% annotators: from the zman take a ghetto tour through a place like baltimore and you see a world that should never exist in a western country less than a long lifetime ago it did not exist it was not allowed to exist by the people in charge . Is the given statement hateful?	0	non-hateful	non-hateful	non-hateful	non-hateful	non-hateful	non-hateful	non-hateful	no	non-hateful	non-hateful	non-hateful	non-hateful	non-hateful	non-hateful	non-hateful	non-hateful	no	non-hateful	non-hateful	non-hateful	non-hateful	non-hateful	no	no	no	non-hateful	non-hateful	no	non-hateful	no	non-hateful	non-hateful	non-hateful	no	non-hateful	non-hateful	no	non-hateful	no	non-hateful	non-hateful	non-hateful	no	no	non-hateful	non-hateful	non-hateful	no
The following statement was labeled non-hateful by 50% annotators: <user> <user> <user> no illegal aliens increase population not lower it and they work for low pay . Is the given statement hateful?	1	no	no	no	no	no	no	no	no	yes	no	yes	yes	no	non-hateful	no	no	no	yes	no	yes	no	yes	no	non-hateful	yes	yes	no	no	no	no	yes	yes	hater	non-hateful	yes	no	yes	no	no	non-hateful	no	non-hateful	no	no	non-hateful	no	no	non-hateful
The following statement was labeled non-hateful by 50% annotators: <user> this excuse for a man that he is because he can not be a man is propangadizing the great people of color to violence against white including females such an embarrassment . Is the given statement hateful?	1	non-hateful	non-hateful	non-hateful	non-hateful	non-hateful	non-hateful	non-hateful	non-hateful	non-hateful	non-hateful	non-hateful	non-hateful	no	non-hateful	non-hateful	no	non-hateful	yes	yes	non-hateful	non-hateful	no	non-hateful	non-hateful	non-hateful	no	yes	non-hateful	no	hateful	no	no	no	non-hateful	non-hateful	yes	non-hateful	yes	non-hateful	yes	No	no	no	no	no	non-hateful	yes	non-hateful
The following statement was labeled non-hateful by 50% annotators: so it turns out that nationalism is the supreme withcraft of the jews and freemasonry its that time when the rothchilds give the next step in creating their new world order also known as the jew world order . Is the given statement hateful?	0	yes	yes	yes	yes	yes	yes	no	yes	yes	hateful	yes	yes	yes	yes	yes	hateful	yes	yes	non-hateful	no	non-hateful	no	hateful	yes	yes	no	yes	non-hateful	no	no	hateful	hateful	yes	hateful	no	no	yes	non-hateful	no	no	no	hateful	hateful	non-hateful	yes	hateful	yes	yes
The following statement was labeled non-hateful by 50% annotators: i am still tryna see what hood a nigga false claim . Is the given statement hateful?	1	yes	yes	yes	yes	yes	yes	yes	yes	yes	yes	hateful	yes	yes	yes	hateful	yes	hateful	hateful	yes	yes	yes	yes	yes	no	yes	hateful	yes	yes	yes	hateful	no	hateful	yes	yes	no	no	yes	yes	yes	yes	no	no	no	no	yes	yes	yes	non-hateful
The following statement was labeled non-hateful by 50% annotators: got a twitter account suspend so here i am nigger nigger nigger jews are duplicitous and you should not cuck for them . Is the given statement hateful?	0	yes	yes	yes	yes	yes	yes	yes	yes	yes	yes	yes	yes	yes	yes	yes	yes	yes	yes	hateful	yes	yes	yes	yes	yes	yes	yes	yes	yes	yes	yes	yes	yes	yes	hateful	yes	yes	yes	yes	yes	yes	hateful	yes	hateful	hateful	yes	yes	yes	yes
The following statement was labeled non-hateful by 50% annotators: and it important to tell them i love me a good queer story with a happy ending but i also love me a realistic story portraying childhood trauma and internal homophobia god . Is the given statement hateful?	1	non-hateful	non-hateful	non-hateful	non-hateful	non-hateful	non-hateful	non-hateful	non-hateful	no	non-hateful	no	no	non-hateful	no	non-hateful	non-hateful	non-hateful	no	non-hateful	non-hateful	non-hateful	non-hateful	non-hateful	non-hateful	non-hateful	non-hateful	non-hateful	non-hateful	no	non-hateful	non-hateful	non-hateful	no	non-hateful	non-hateful	no	non-hateful	non-hateful	non-hateful	non-hateful	non-hateful	no	non-hateful	no	non-hateful	non-hateful	non-hateful	no
The following statement was labeled non-hateful by 50% annotators: black violence is wildly out of proportion . Is the given statement hateful?	1	non-hateful	non-hateful	non-hateful	non-hateful	non-hateful	non-hateful	non-hateful	non-hateful	non-hateful	non-hateful	non-hateful	non-hateful	non-hateful	no	non-hateful	non-hateful	no	non-hateful	non-hateful	non-hateful	non-hateful	non-hateful	non-hateful	no	non-hateful	non-hateful	non-hateful	non-hateful	non-hateful	non-hateful	no	non-hateful	non-hateful	non-hateful	non-hateful	non-hateful	non-hateful	non-hateful	non-hateful	non-hateful	non-hateful	non-hateful	non-hateful	non-hateful	yes	non-hateful	non-hateful	non-hateful
The following statement was labeled non-hateful by 50% annotators: so my iphone still thinks fuck is duck but it auto corrects hufflepuff with no issue <number> is gay af . Is the given statement hateful?	1	no	no	yes	no	no	no	yes	no	no	no	no	yes	no	no	no	yes	no	no	no	no	no	yes	non-hateful	no	no	yes	yes	no	no	no	yes	no	no	no	hateful	no	yes	no	no	no	no	non-hateful	anti-gay	no	no	no	no	yes
The following statement was labeled non-hateful by 50% annotators: i am a white nationalist who else is a white nationalist . Is the given statement hateful?	1	non-hateful	non-hateful	non-hateful	non-hateful	non-hateful	non-hateful	non-hateful	non-hateful	non-hateful	non-hateful	non-hateful	non-hateful	non-hateful	no	non-hateful	non-hateful	non-hateful	non-hateful	non-hateful	non-hateful	no	no	non-hateful	non-hateful	no	non-hateful	non-hateful	yes	non-hateful	non-hateful	non-hateful	non-hateful	non-hateful	no	non-hateful	non-hateful	no	non-hateful	yes	no	yes	no	non-hateful	non-hateful	no	yes	no	no
The following statement was labeled non-hateful by 50% annotators: hes a mohammaden just the same as every muslim in the world obeying the qur an . Is the given statement hateful?	1	non-hateful	non-hateful	non-hateful	non-hateful	non-hateful	non-hateful	non-hateful	non-hateful	non-hateful	non-hateful	non-hateful	non-hateful	non-hateful	non-hateful	non-hateful	no	non-hateful	non-hateful	no	non-hateful	non-hateful	non-hateful	non-hateful	non-hateful	non-hateful	non-hateful	non-hateful	no	non-hateful	non-hateful	non-hateful	non-hateful	non-hateful	non-hateful	non-hateful	non-hateful	non-hateful	non-hateful	no	non-hateful	non-hateful	non-hateful	yes	no	no	non-hateful	non-hateful	non-hateful
The following statement was labeled non-hateful by 50% annotators: maybe ban the nazis before u wanna worry about me tweeting something for the thousandth time . Is the given statement hateful?	1	non-hateful	non-hateful	non-hateful	non-hateful	non-hateful	no	non-hateful	non-hateful	no	non-hateful	no	non-hateful	non-hateful	non-hateful	no	yes	non-hateful	no	non-hateful	non-hateful	non-hateful	non-hateful	no	non-hateful	non-hateful	non-hateful	non-hateful	non-hateful	no	no	non-hateful	non-hateful	no	no	no	non-hateful	non-hateful	no	non-hateful	non-hateful	non-hateful	yes	non-hateful	no	non-hateful	no	non-hateful	non-hateful
The following statement was labeled non-hateful by 50% annotators: muslim countries refusing to take in or help muslim refugees raises no outcry from the alt left liberal socialists but a temporary ban on travelling here from a known terror hotspot is inhumane fucktards . Is the given statement hateful?	0	yes	yes	yes	yes	yes	yes	yes	yes	yes	yes	hateful	yes	yes	yes	yes	yes	yes	yes	yes	no	yes	hateful	non-hateful	non-hateful	non-hateful	no	yes	non-hateful	no	yes	yes	no	hateful	yes	yes	hateful	hateful	no	hateful	no	yes	hateful	no	yes	hateful	yes	yes	yes
The following statement was labeled non-hateful by 50% annotators: where are the condemnations of violence against <number> kissimmee fl cops last night that left <number> dead hello media rinos democrats bluelivesmatter . Is the given statement hateful?	1	non-hateful	non-hateful	non-hateful	non-hateful	non-hateful	non-hateful	non-hateful	no	non-hateful	non-hateful	non-hateful	non-hateful	no	no	non-hateful	non-hateful	non-hateful	non-hateful	no	non-hateful	non-hateful	no	no	no	non-hateful	no	non-hateful	no	non-hateful	non-hateful	non-hateful	no	no	non-hateful	non-hateful	non-hateful	non-hateful	non-hateful	non-hateful	non-hateful	non-hateful	no	non-hateful	no	non-hateful	no	no	non-hateful
The following statement was labeled non-hateful by 50% annotators: my iq is a confirmed <number> points checkmate you ignorant faggots <user> . Is the given statement hateful?	0	yes	yes	yes	yes	yes	yes	yes	yes	yes	yes	hateful	yes	yes	yes	no	yes	yes	no	yes	yes	yes	yes	yes	yes	yes	no	yes	yes	yes	yes	yes	hateful	yes	yes	yes	no	yes	yes	yes	yes	yes	yes	yes	yes	hateful	yes	hateful	yes
The following statement was labeled non-hateful by 50% annotators: u niggers r coonin for that kanye shit . Is the given statement hateful?	0	yes	yes	yes	yes	yes	yes	yes	hateful	yes	yes	yes	yes	yes	yes	yes	yes	yes	yes	yes	yes	hateful	yes	hateful	yes	hateful	hateful	yes	hateful	yes	yes	yes	yes	yes	yes	yes	yes	yes	yes	hateful	hateful	yes	yes	yes	yes	yes	hateful	hateful	hateful
The following statement was labeled non-hateful by 50% annotators: i did not watch that far i saw men in skirts got pissed and shut it off you know all the muzzies were standing around laughing their asses off at those dumb fucking cucktard faggots you know who doesn t wear skirts me . Is the given statement hateful?	0	yes	yes	yes	yes	yes	yes	yes	yes	yes	yes	yes	yes	yes	yes	yes	yes	yes	yes	yes	yes	yes	yes	yes	yes	yes	yes	hateful	yes	yes	no	yes	hateful	yes	yes	yes	yes	yes	hateful	yes	yes	hateful	yes	yes	yes	yes	yes	yes	yes
The following statement was labeled non-hateful by 50% annotators: clint eastwood is a conservative director i think he used to fuck a nigger though is used to fuck a nigger proper grammar i am having an appalachian moment . Is the given statement hateful?	0	yes	yes	yes	yes	yes	yes	yes	yes	yes	yes	hateful	yes	yes	yes	no	yes	hateful	yes	yes	no	no	no	yes	yes	yes	yes	yes	yes	yes	yes	non-hateful	yes	hateful	no	non-hateful	hateful	yes	yes	hateful	non-hateful	hateful	no	yes	yes	hateful	hateful	non-hateful	no
The following statement was labeled non-hateful by 50% annotators: wishing the happiest birthday to my favorite crackhead <user> love u bitch . Is the given statement hateful?	1	yes	yes	yes	yes	yes	yes	yes	yes	yes	yes	yes	yes	yes	yes	yes	yes	yes	yes	hateful	yes	yes	hateful	yes	yes	yes	yes	yes	yes	yes	no	yes	hateful	yes	yes	hateful	yes	hateful	yes	no	hateful	yes	hateful	yes	hateful	yes	hateful	yes	yes
The following statement was labeled non-hateful by 50% annotators: i call women love who i do not know all the time as you may have noted nothing sexual or demeaning meant just being friendly it is not a chat up line . Is the given statement hateful?	1	non-hateful	non-hateful	non-hateful	non-hateful	non-hateful	non-hateful	non-hateful	non-hateful	non-hateful	non-hateful	no	non-hateful	non-hateful	no	non-hateful	non-hateful	non-hateful	non-hateful	non-hateful	non-hateful	non-hateful	non-hateful	non-hateful	non-hateful	non-hateful	no	non-hateful	non-hateful	non-hateful	non-hateful	non-hateful	non-hateful	non-hateful	non-hateful	no	no	non-hateful	non-hateful	no	non-hateful	no	no	non-hateful	non-hateful	non-hateful	no	non-hateful	non-hateful
The following statement was labeled non-hateful by 50% annotators: <user> idubbz says nigger faggot all the time but no one actually gives him shit for it lol people are stupid as fuck . Is the given statement hateful?	1	yes	yes	yes	yes	yes	yes	yes	yes	yes	yes	yes	hateful	yes	yes	yes	yes	yes	yes	yes	yes	yes	yes	yes	yes	hateful	hateful	yes	no	yes	yes	yes	yes	yes	hateful	hateful	hateful	hateful	no	yes	hateful	yes	yes	hatful	hateful	yes	yes	yes	hateful
The following statement was labeled non-hateful by 50% annotators: fuck you all dykes . Is the given statement hateful?	0	yes	yes	yes	yes	yes	yes	yes	yes	yes	yes	yes	yes	yes	yes	yes	yes	yes	hateful	yes	yes	yes	yes	yes	yes	yes	yes	yes	hateful	yes	yes	hateful	yes	yes	hateful	hateful	yes	yes	yes	yes	no	yes	yes	yes	yes	yes	yes	yes	yes
The following statement was labeled non-hateful by 50% annotators: do not blow your horn at me cuz you can not drive bitch . Is the given statement hateful?	1	yes	yes	yes	yes	yes	yes	yes	yes	yes	yes	yes	yes	yes	yes	yes	no	yes	yes	yes	yes	yes	yes	yes	yes	yes	yes	yes	yes	yes	yes	yes	yes	yes	yes	yes	yes	yes	no	yes	hateful	yes	yes	yes	hateful	yes	yes	yes	yes
The following statement was labeled non-hateful by 50% annotators: <user> omg we ’ re so gay . Is the given statement hateful?	1	non-hateful	non-hateful	non-hateful	non-hateful	non-hateful	non-hateful	non-hateful	non-hateful	non-hateful	non-hateful	non-hateful	non-hateful	non-hateful	non-hateful	non-hateful	non-hateful	non-hateful	no	non-hateful	non-hateful	non-hateful	non-hateful	non-hateful	no	non-hateful	non-hateful	non-hateful	non-hateful	non-hateful	no	non-hateful	non-hateful	non-hateful	no	non-hateful	non-hateful	no	non-hateful	no	no	non-hateful	non-hateful	non-hateful	non-hateful	no	non-hateful	no	no
The following statement was labeled non-hateful by 50% annotators: blacktivists ignorantly demand that white people who do not and have not owned slaves need to pay reparations to black people who are not and have not been slaves how bout you just get jobs and pay for your own shit ghetto rats . Is the given statement hateful?	0	yes	yes	yes	yes	yes	yes	yes	yes	yes	yes	yes	no	yes	yes	yes	hateful	yes	hateful	yes	yes	yes	yes	hateful	yes	yes	hateful	hateful	hateful	yes	yes	hateful	no	yes	yes	yes	no	yes	yes	no	yes	yes	yes	no	yes	hateful	hateful	hateful	yes
The following statement was labeled non-hateful by 50% annotators: jews couch their distrust of whites as if it were a logical response to random violence that we routinely heap upon them because of our barbaric gentile ways the truth though is that they want us gone because we are the only ones who routinely oppose their nefarious schemes for domination . Is the given statement hateful?	1	non-hateful	non-hateful	non-hateful	non-hateful	non-hateful	non-hateful	no	no	non-hateful	no	no	no	non-hateful	non-hateful	non-hateful	yes	non-hateful	no	no	no	yes	non-hateful	hateful	no	no	hateful	non-hateful	non-hateful	hateful	no	non-hateful	yes	no	no	yes	no	yes	non-hateful	no	no	yes	hateful	non-hateful	yes	no	no	no	no
The following statement was labeled non-hateful by 50% annotators: <user> <user> how many die every day especially the weekends in chicago douche and your crying about el paso if someone carried the death count would have been lower like dayton moron sheep for women i would not vote for one feminazi not one . Is the given statement hateful?	1	yes	yes	yes	yes	yes	yes	yes	yes	yes	yes	yes	yes	yes	yes	yes	yes	yes	yes	yes	yes	yes	yes	hateful	yes	yes	yes	yes	yes	yes	yes	hateful	yes	non-hateful	yes	yes	hateful	yes	yes	yes	hateful	i.	yes	yes	yes	hateful	yes	no	yes
The following statement was labeled non-hateful by 50% annotators: you can call me extremist degenerate deplorable kk whitest or whatever other name you like immigrants have taken what few job american have and corrupt politicians and corporation have taken the rest so do not give us any of this poor immigrant crap then use our taxes to support them . Is the given statement hateful?	0	yes	yes	yes	yes	yes	yes	hateful	yes	yes	yes	yes	yes	hateful	yes	yes	yes	hateful	yes	yes	hateful	yes	hateful	yes	yes	yes	yes	hateful	hateful	no	yes	yes	hateful	hateful	hateful	yes	yes	yes	yes	yes	yes	hater	a.	hateful	yes	yes	no	yes	yes
The following statement was labeled non-hateful by 50% annotators: why is this fat black niggress so upset get off those cupcakes you fat bitch . Is the given statement hateful?	0	yes	yes	yes	yes	yes	yes	yes	yes	yes	yes	yes	yes	yes	yes	yes	yes	yes	yes	yes	yes	yes	yes	hateful	yes	yes	yes	yes	yes	yes	yes	yes	yes	hateful	yes	yes	yes	yes	hateful	hateful	hateful	yes	hateful	yes	yes	yes	yes	yes	hateful
The following statement was labeled non-hateful by 50% annotators: <user> shes a bum n a world renown racist shes on par with farankhan n rev jeremiah wright michelle had non stop criticism for cops white christian repubs jews israel our military i support israel <percent> they r our allies in the middle east m obama soiled white house w her rhetoric . Is the given statement hateful?	1	yes	yes	yes	no	yes	non-hateful	non-hateful	no	non-hateful	non-hateful	non-hateful	yes	yes	hateful	yes	non-hateful	yes	non-hateful	yes	yes	yes	yes	non-hateful	non-hateful	non-hateful	non-hateful	yes	non-hateful	non-hateful	no	non-hateful	yes	yes	non-hateful	non-hateful	non-hateful	hateful	no	yes	yes	non-hateful	yes	no	yes	hateful	yes	no	no
The following statement was labeled non-hateful by 50% annotators: australia is not a nation of immigrants but settlers and pioneers south australia is the only part that was settled by euro immigration and its one of the tinniest states . Is the given statement hateful?	1	non-hateful	non-hateful	non-hateful	non-hateful	non-hateful	non-hateful	non-hateful	non-hateful	non-hateful	non-hateful	no	non-hateful	non-hateful	non-hateful	no	no	non-hateful	non-hateful	no	non-hateful	non-hateful	no	non-hateful	non-hateful	non-hateful	non-hateful	non-hateful	no	no	non-hateful	non-hateful	non-hateful	no	no	non-hateful	non-hateful	no	non-hateful	non-hateful	no	no	non-hateful	non-hateful	non-hateful	no	no	no	no
The following statement was labeled non-hateful by 50% annotators: lol i live in a white nigger ghetto i claim no white niggerhood as a former english teacher i slum when i feel choose unlike my fellow city rats for whom its their only mode of comm . Is the given statement hateful?	0	yes	yes	yes	yes	yes	yes	yes	yes	yes	yes	yes	hateful	yes	yes	yes	no	yes	yes	no	yes	non-hateful	no	yes	no	yes	yes	yes	hateful	yes	yes	no	no	yes	no	yes	yes	hateful	non-hateful	no	no	no	yes	non-hateful	yes	hateful	yes	no	yes
The following statement was labeled non-hateful by 50% annotators: <user> <user> yes this is actually the old traditional alba rose it very large <number> <number> feet in height with all the rain we had in june it was full of white blooms in the late spring amazing it really maintenance free too but no i am too lazy to make jelly . Is the given statement hateful?	1	non-hateful	non-hateful	non-hateful	non-hateful	no	non-hateful	no	no	non-hateful	non-hateful	non-hateful	non-hateful	non-hateful	no	no	no	non-hateful	non-hateful	no	no	non-hateful	non-hateful	non-hateful	non-hateful	non-hateful	non-hateful	non-hateful	no	non-hateful	non-hateful	non-hateful	no	non-hateful	non-hateful	no	non-hateful	no	no	non-hateful	no	non-hateful	non-hateful	0	non-hateful	non-hateful	non-hateful	no	non-hateful
The following statement was labeled non-hateful by 50% annotators: this weather for jadakiss dykes . Is the given statement hateful?	1	yes	yes	yes	yes	yes	yes	yes	no	yes	no	no	no	yes	yes	yes	yes	yes	yes	yes	no	yes	yes	no	yes	yes	no	yes	no	yes	yes	yes	no	yes	no	hateful	yes	no	yes	yes	yes	yes	yes	non-hateful	no	yes	yes	yes	yes
The following statement was labeled non-hateful by 50% annotators: well cuz da jews suck dose babydicks . Is the given statement hateful?	0	yes	yes	yes	yes	yes	yes	yes	yes	yes	yes	yes	yes	yes	yes	yes	yes	yes	yes	yes	yes	yes	yes	yes	yes	yes	yes	yes	yes	yes	yes	hateful	yes	yes	yes	yes	yes	no	no	no	yes	yes	hateful	yes	yes	yes	hateful	hateful	yes
The following statement was labeled non-hateful by 50% annotators: everybody criticize lebron as if they can do w this nigga has done for the last <number> yrs lol . Is the given statement hateful?	1	yes	yes	yes	yes	yes	yes	yes	yes	yes	yes	yes	yes	yes	yes	yes	yes	yes	yes	yes	yes	yes	yes	yes	hateful	no	yes	yes	hateful	yes	yes	hateful	yes	yes	yes	yes	hateful	yes	yes	yes	(A).	yes	hateful	no	yes	yes	no	yes	yes
The following statement was labeled non-hateful by 50% annotators: did not you have to leave for work hours ago you shit tier kike lol tell your hooknosed bosses to send someone better before your shift ends . Is the given statement hateful?	0	yes	yes	yes	yes	yes	yes	yes	yes	yes	yes	yes	yes	yes	yes	yes	yes	yes	yes	hateful	yes	yes	yes	yes	yes	hateful	yes	yes	hateful	yes	hateful	yes	hateful	yes	yes	yes	yes	yes	yes	yes	yes	yes	hateful	yes	yes	yes	yes	yes	yes
The following statement was labeled non-hateful by 50% annotators: gays love communism and especially islam they want to try to see if they can fly of tall buildings with a pack of carpet kissers helping them just to show they are not racist lol . Is the given statement hateful?	0	yes	no	yes	non-hateful	yes	yes	yes	yes	no	yes	yes	hateful	no	no	yes	yes	yes	no	yes	no	hateful	yes	hateful	yes	hateful	yes	yes	hateful	no	non-hateful	hateful	non-hateful	yes	hateful	no	yes	no	yes	yes	hateful	no	yes	yes	yes	non-hateful	hateful	hateful	yes
The following statement was labeled non-hateful by 50% annotators: <user> <user> <user> 🤡 clownery luv i swear coons need to stop being submissive to white people . Is the given statement hateful?	0	yes	yes	yes	yes	yes	yes	yes	yes	yes	yes	yes	yes	hateful	hateful	yes	non-hateful	yes	yes	yes	yes	yes	yes	yes	hateful	no	yes	hateful	yes	yes	hateful	non-hateful	yes	yes	yes	hateful	yes	yes	yes	no	no	hateful	yes	no	hateful	[a].	hateful	no	no
The following statement was labeled non-hateful by 50% annotators: <user> club diego tho stripper poles stripper hoes . Is the given statement hateful?	1	yes	yes	yes	yes	yes	yes	yes	yes	yes	yes	yes	yes	hateful	yes	yes	yes	yes	yes	yes	yes	yes	yes	yes	yes	yes	yes	yes	yes	yes	yes	yes	yes	yes	yes	(A).	yes	yes	yes	yes	no	no	no	yes	hateful	yes	yes	yes	yes
The following statement was labeled non-hateful by 50% annotators: <user> we sentence you to the harshest punishment we have ever given a white person three months of community service restored to your position on the force with backpay and bonus and a written apology from the victim family for putting you through this ordeal . Is the given statement hateful?	1	non-hateful	non-hateful	non-hateful	non-hateful	non-hateful	non-hateful	non-hateful	non-hateful	non-hateful	non-hateful	non-hateful	non-hateful	non-hateful	no	non-hateful	no	non-hateful	non-hateful	non-hateful	non-hateful	no	non-hateful	no	non-hateful	no	non-hateful	non-hateful	non-hateful	no	yes	no	non-hateful	no	no	no	non-hateful	non-hateful	non-hateful	non-hateful	non-hateful	non-hateful	non-hateful	no	non-hateful	no	non-hateful	no	no
The following statement was labeled non-hateful by 50% annotators: my friend saying that suicide squad is better than avengers and i was like bitch say it again i triple dare you . Is the given statement hateful?	1	yes	yes	yes	yes	yes	yes	yes	yes	yes	yes	yes	yes	yes	yes	yes	yes	yes	yes	yes	no	yes	yes	yes	yes	yes	yes	yes	yes	yes	hateful	yes	yes	yes	non-hateful	no	(a).	yes	yes	I.	yes	yes	yes	no	yes	yes	non-hateful	hateful	yes
The following statement was labeled non-hateful by 50% annotators: and whatever leftist or muslim piece of shit downvoted this post let me be clear you can go fuck your mother after you admit that the so called prophet muhammad was a pervert and a fool britainfirst freejaydafransen freepaulgolding . Is the given statement hateful?	0	yes	yes	yes	yes	yes	yes	yes	yes	yes	yes	yes	yes	yes	yes	yes	yes	yes	yes	yes	yes	yes	yes	yes	no	hateful	hateful	yes	yes	yes	yes	yes	no	yes	yes	non-hateful	no	yes	yes	no	yes	yes	yes	yes	non-hateful	hateful	yes	i.	no
The following statement was labeled non-hateful by 50% annotators: <user> what are you a nazi . Is the given statement hateful?	1	non-hateful	no	no	no	non-hateful	non-hateful	non-hateful	non-hateful	no	non-hateful	no	no	yes	non-hateful	non-hateful	no	no	no	yes	no	no	yes	no	no	hateful	no	non-hateful	non-hateful	yes	no	no	non-hateful	yes	no	no	no	yes	yes	yes	non-hateful	hateful	non-hateful	non-hateful	no	no	yes	non-hateful	hateful
The following statement was labeled non-hateful by 50% annotators: goat fucking woman beating child raping sand niggers everywhere . Is the given statement hateful?	0	yes	yes	yes	yes	yes	yes	yes	yes	yes	yes	hateful	yes	yes	yes	yes	yes	yes	yes	yes	yes	yes	hateful	yes	yes	yes	yes	yes	yes	hateful	yes	yes	hateful	hateful	yes	yes	yes	a).	hateful	yes	hateful	hateful	yes	yes	hateful	yes	hateful	hateful	hateful
The following statement was labeled non-hateful by 50% annotators: ibor is dumb boomer kike shill proposition only paul nehlen shall not censor is worth a while . Is the given statement hateful?	0	yes	yes	yes	yes	yes	yes	yes	yes	yes	yes	yes	yes	yes	yes	yes	hateful	hateful	hateful	yes	hateful	yes	yes	no	yes	hateful	yes	hateful	yes	yes	yes	yes	yes	no	yes	yes	hateful	yes	yes	hateful	no	yes	yes	yes	hateful	yes	yes	yes	hateful
The following statement was labeled non-hateful by 50% annotators: i thought wendy wasserman schultz was one ugly jewess where do they dig these disgusting jews up from they are caricatures of humans michellewolf journalists killjournalists . Is the given statement hateful?	0	yes	yes	yes	yes	yes	yes	yes	yes	yes	yes	yes	yes	yes	yes	yes	yes	yes	yes	yes	yes	yes	hateful	hateful	yes	yes	yes	yes	yes	yes	non-hateful	yes	yes	hateful	yes	yes	yes	yes	yes	yes	i.	no	yes	a).	hateful	hateful	hateful	yes	(I)
The following statement was labeled non-hateful by 50% annotators: kill nigger like love . Is the given statement hateful?	0	yes	yes	yes	yes	yes	yes	yes	yes	yes	yes	yes	yes	yes	hateful	yes	yes	yes	yes	yes	yes	yes	hateful	yes	yes	yes	yes	yes	yes	hateful	yes	yes	yes	yes	yes	no	yes	yes	hateful	hateful	yes	yes	hateful	yes	hateful	no	no	yes	yes
The following statement was labeled non-hateful by 50% annotators: when you wanna be white really really bad but you are just a fucking wetback . Is the given statement hateful?	0	yes	yes	yes	yes	yes	yes	yes	yes	yes	yes	yes	yes	yes	yes	yes	yes	yes	yes	hateful	hateful	yes	yes	yes	yes	yes	hateful	yes	hateful	hateful	yes	hateful	yes	yes	no	yes	yes	yes	yes	yes	yes	hateful	hateful	hateful	yes	hateful	yes	hateful	yes
The following statement was labeled non-hateful by 50% annotators: miss america shall embrace beer for beer makes fat women look beautiful . Is the given statement hateful?	1	non-hateful	non-hateful	non-hateful	non-hateful	non-hateful	non-hateful	non-hateful	non-hateful	no	non-hateful	non-hateful	non-hateful	non-hateful	non-hateful	non-hateful	non-hateful	non-hateful	non-hateful	non-hateful	non-hateful	non-hateful	non-hateful	non-hateful	no	no	no	non-hateful	non-hateful	non-hateful	non-hateful	non-hateful	non-hateful	non-hateful	non-hateful	non-hateful	non-hateful	non-hateful	non-hateful	non-hateful	non-hateful	non-hateful	non-hateful	non-hateful	non-hateful	non-hateful	no	non-hateful	no
The following statement was labeled non-hateful by 50% annotators: funny my gay lover and i had no idea we were homophobes until we came out as trump voters . Is the given statement hateful?	1	non-hateful	non-hateful	non-hateful	non-hateful	non-hateful	non-hateful	non-hateful	non-hateful	non-hateful	non-hateful	non-hateful	non-hateful	non-hateful	non-hateful	non-hateful	no	non-hateful	non-hateful	non-hateful	no	non-hateful	non-hateful	no	non-hateful	non-hateful	non-hateful	non-hateful	non-hateful	no	non-hateful	no	no	non-hateful	no	no	no	non-hateful	non-hateful	non-hateful	no	non-hateful	non-hateful	no	non-hateful	non-hateful	non-hateful	no	non-hateful
The following statement was labeled non-hateful by 50% annotators: going to start exercising my constitutional right call people dumb faggots in public . Is the given statement hateful?	0	yes	yes	yes	yes	yes	yes	yes	yes	yes	yes	hateful	hateful	yes	hateful	hateful	yes	hateful	yes	yes	hateful	yes	yes	yes	yes	yes	yes	hateful	yes	hateful	yes	yes	yes	no	yes	no	yes	yes	yes	hateful	no	no	yes	yes	yes	yes	non-hateful	no	no
The following statement was labeled non-hateful by 50% annotators: watching unbelievable netflix the rapist has a copy of the ethical slut unbelievable . Is the given statement hateful?	1	no	non-hateful	non-hateful	no	yes	non-hateful	no	non-hateful	no	no	non-hateful	no	non-hateful	no	no	no	no	no	no	no	non-hateful	no	no	no	no	no	no	no	non-hateful	non-hateful	non-hateful	yes	non-hateful	no	non-hateful	non-hateful	no	no	yes	non-hateful	no	no	non-hateful	no	no	non-hateful	non-hateful	non-hateful
The following statement was labeled non-hateful by 50% annotators: <user> i rly enjoying this gay moment of urs . Is the given statement hateful?	1	non-hateful	non-hateful	non-hateful	non-hateful	non-hateful	non-hateful	non-hateful	non-hateful	non-hateful	non-hateful	non-hateful	non-hateful	non-hateful	non-hateful	non-hateful	non-hateful	non-hateful	non-hateful	non-hateful	non-hateful	non-hateful	non-hateful	non-hateful	non-hateful	non-hateful	non-hateful	non-hateful	non-hateful	non-hateful	no	non-hateful	non-hateful	non-hateful	non-hateful	no	non-hateful	non-hateful	non-hateful	non-hateful	non-hateful	non-hateful	non-hateful	non-hateful	no	non-hateful	non-hateful	non-hateful	no
The following statement was labeled non-hateful by 50% annotators: newsom wants the train now he does not newsom wants the train now he does not the guy is a fucking quack who would vote him in . Is the given statement hateful?	1	yes	yes	yes	yes	yes	yes	yes	yes	yes	yes	yes	yes	yes	yes	yes	yes	yes	yes	yes	yes	yes	yes	yes	yes	yes	yes	yes	yes	yes	yes	yes	hateful	yes	yes	no	hateful	yes	yes	yes	yes	yes	yes	yes	yes	no	no	yes	non-hateful
The following statement was labeled non-hateful by 50% annotators: now of course the towelhead perps will be perps that the police had on their radar and did nothing about . Is the given statement hateful?	0	no	no	no	no	no	no	no	non-hateful	no	no	no	no	no	no	non-hateful	no	no	no	no	yes	yes	yes	yes	no	non-hateful	yes	yes	yes	non-hateful	no	no	non-hateful	no	no	yes	no	no	no	yes	yes	yes	no	no	yes	yes	no	yes	non-hateful
The following statement was labeled non-hateful by 50% annotators: this obnoxious nigger bitch on tucker show deserves a noose put around her neck and hanged until she dead . Is the given statement hateful?	0	yes	yes	yes	yes	yes	yes	yes	yes	yes	yes	yes	yes	yes	yes	yes	yes	yes	yes	yes	yes	yes	yes	yes	yes	yes	hateful	yes	hateful	yes	yes	yes	yes	hateful	yes	yes	yes	yes	yes	yes	hateful	hateful	yes	yes	yes	yes	yes	hateful	yes
The following statement was labeled non-hateful by 50% annotators: because the jews in israel are the only democracy in the mideast . Is the given statement hateful?	1	non-hateful	non-hateful	non-hateful	non-hateful	non-hateful	non-hateful	non-hateful	non-hateful	non-hateful	non-hateful	non-hateful	non-hateful	non-hateful	non-hateful	non-hateful	non-hateful	non-hateful	non-hateful	non-hateful	non-hateful	non-hateful	non-hateful	non-hateful	non-hateful	non-hateful	non-hateful	non-hateful	non-hateful	non-hateful	non-hateful	non-hateful	non-hateful	non-hateful	non-hateful	non-hateful	non-hateful	non-hateful	non-hateful	non-hateful	non-hateful	non-hateful	non-hateful	non-hateful	non-hateful	non-hateful	non-hateful	non-hateful	non-hateful
The following statement was labeled non-hateful by 50% annotators: <user> true religion is islam your excellency and i am proud be a muslim why because i respect other religions . Is the given statement hateful?	1	non-hateful	non-hateful	non-hateful	non-hateful	non-hateful	non-hateful	non-hateful	non-hateful	non-hateful	non-hateful	non-hateful	non-hateful	non-hateful	non-hateful	non-hateful	non-hateful	non-hateful	non-hateful	non-hateful	non-hateful	non-hateful	non-hateful	non-hateful	non-hateful	non-hateful	non-hateful	no	non-hateful	non-hateful	non-hateful	non-hateful	no	non-hateful	non-hateful	non-hateful	no	non-hateful	no	non-hateful	non-hateful	non-hateful	non-hateful	non-hateful	non-hateful	non-hateful	non-hateful	no	no
The following statement was labeled non-hateful by 50% annotators: i love my women but she thinks i ’ m playing . Is the given statement hateful?	1	non-hateful	non-hateful	non-hateful	non-hateful	non-hateful	no	non-hateful	non-hateful	non-hateful	no	non-hateful	non-hateful	non-hateful	non-hateful	non-hateful	non-hateful	non-hateful	non-hateful	non-hateful	non-hateful	non-hateful	non-hateful	non-hateful	no	no	non-hateful	no	non-hateful	non-hateful	no	non-hateful	no	non-hateful	non-hateful	non-hateful	non-hateful	non-hateful	non-hateful	non-hateful	non-hateful	non-hateful	no	non-hateful	non-hateful	non-hateful	no	no	non-hateful
The following statement was labeled non-hateful by 50% annotators: <user> you know the girls came out and literally said they didn ’ t get raped cole tried to get clout from the whole situation . Is the given statement hateful?	1	non-hateful	non-hateful	non-hateful	non-hateful	non-hateful	non-hateful	non-hateful	no	non-hateful	non-hateful	non-hateful	non-hateful	non-hateful	non-hateful	non-hateful	non-hateful	no	non-hateful	no	non-hateful	non-hateful	no	non-hateful	non-hateful	non-hateful	non-hateful	non-hateful	non-hateful	non-hateful	non-hateful	non-hateful	no	non-hateful	yes	no	non-hateful	no	no	non-hateful	non-hateful	no	non-hateful	non-hateful	no	yes	no	no	non-hateful
The following statement was labeled non-hateful by 50% annotators: i have not said it enough but fuck white bitches . Is the given statement hateful?	0	yes	yes	yes	yes	yes	yes	yes	yes	yes	yes	yes	yes	yes	yes	yes	yes	yes	yes	hateful	yes	yes	yes	yes	yes	yes	hateful	yes	yes	yes	yes	yes	hateful	yes	yes	hateful	yes	yes	yes	yes	yes	yes	yes	yes	yes	yes	no	yes	yes
The following statement was labeled non-hateful by 50% annotators: so let me get this straight google youtube facebook and msm are targeting free speech in the name of fakenews to protect a sleezy pizza place but they are okay shutting down a bakery who chooses not to make a cake for a gay wedding i smell guilt . Is the given statement hateful?	1	non-hateful	non-hateful	non-hateful	non-hateful	non-hateful	non-hateful	non-hateful	non-hateful	non-hateful	non-hateful	non-hateful	non-hateful	non-hateful	non-hateful	non-hateful	non-hateful	non-hateful	non-hateful	non-hateful	non-hateful	non-hateful	non-hateful	non-hateful	non-hateful	non-hateful	no	non-hateful	no	non-hateful	no	non-hateful	non-hateful	non-hateful	no	non-hateful	no	non-hateful	non-hateful	non-hateful	non-hateful	non-hateful	non-hateful	non-hateful	non-hateful	non-hateful	no	yes	no
The following statement was labeled non-hateful by 50% annotators: recoupping out however is an inmate boulder for men and scum will distinctively immigrate it . Is the given statement hateful?	1	no	no	no	no	no	no	no	no	no	no	no	no	no	yes	no	yes	non-hateful	non-hateful	no	no	yes	non-hateful	no	yes	no	hateful	no	non-hateful	non-hateful	no	yes	no	hateful	non-hateful	no	hateful	non-hateful	no	yes	yes	no	no	hateful	no	yes	no	no	no
The following statement was labeled non-hateful by 50% annotators: <user> that explains why you do not have a problem with white genocide you are not white you are a kike that hates european whites fuck off . Is the given statement hateful?	0	yes	yes	yes	yes	yes	yes	yes	yes	yes	hateful	yes	hateful	hateful	yes	hateful	hateful	yes	hateful	yes	no	yes	hateful	yes	yes	yes	yes	yes	yes	yes	yes	yes	non-hateful	yes	hateful	hateful	hateful	yes	yes	hateful	non-hateful	yes	no	yes	yes	hateful	yes	hateful	hateful
The following statement was labeled non-hateful by 50% annotators: with twitter banning me for <number> hours it is showing me the usa exactly what it feels like to be living in a communist state only thing missing is getting raped by a muslim watching my child getting married or raped by an old man . Is the given statement hateful?	0	no	no	non-hateful	no	no	no	non-hateful	non-hateful	no	no	no	non-hateful	non-hateful	no	no	yes	non-hateful	no	no	yes	non-hateful	yes	non-hateful	hateful	no	no	yes	hateful	yes	non-hateful	non-hateful	non-hateful	non-hateful	yes	no	yes	non-hateful	no	non-hateful	non-hateful	no	no	no	non-hateful	non-hateful	non-hateful	no	hating
The following statement was labeled non-hateful by 50% annotators: the nigger that shot up the church was an immigrant from from sudan . Is the given statement hateful?	0	yes	yes	yes	hateful	yes	yes	yes	yes	yes	yes	yes	yes	yes	yes	yes	yes	yes	yes	hateful	hateful	yes	yes	hateful	yes	hateful	hateful	yes	yes	yes	hateful	hateful	yes	yes	yes	yes	yes	hateful	yes	yes	yes	hateful	hateful	yes	yes	hateful	yes	yes	yes
The following statement was labeled non-hateful by 50% annotators: another lying friggin nigger . Is the given statement hateful?	0	yes	yes	yes	yes	yes	yes	yes	yes	yes	yes	yes	yes	yes	yes	yes	yes	yes	yes	yes	yes	yes	yes	yes	yes	yes	yes	yes	yes	yes	yes	hateful	yes	yes	yes	yes	yes	yes	yes	yes	yes	yes	hateful	yes	yes	no	yes	yes	no
The following statement was labeled non-hateful by 50% annotators: do some research tony you will find out that mohammed was an illiterate sand nigger married to jewesses rabbis were behind the whole islamic scam jews and arabs are basically inbred cousins neither jews or muzzies have any business being in white civilizations . Is the given statement hateful?	0	yes	yes	yes	hateful	hateful	hateful	yes	hateful	hateful	hateful	yes	yes	yes	yes	yes	yes	hateful	yes	hateful	yes	yes	yes	yes	yes	hateful	hateful	yes	yes	yes	yes	hateful	yes	yes	yes	yes	no	hateful	yes	yes	hateful	hateful	hateful	yes	yes	yes	yes	hateful	no
The following statement was labeled non-hateful by 50% annotators: it always a upset white person or black person who dying to be white in my mentions upset af hoe well 🤷 🏾 ‍ ♀️ . Is the given statement hateful?	1	yes	yes	hateful	yes	hateful	yes	yes	yes	yes	yes	yes	no	hateful	yes	yes	yes	yes	hateful	hateful	yes	hateful	yes	hateful	yes	hateful	yes	non-hateful	no	yes	hateful	yes	yes	hateful	yes	hateful	hateful	non-hateful	no	hateful	yes	hateful	no	yes	yes	non-hateful	yes	yes	hateful
The following statement was labeled non-hateful by 50% annotators: go live with your beloved niggers should be the only response to this kind of shit from now on oh u hate white ppl do u live in a shitty ghetto with blacks y not . Is the given statement hateful?	0	yes	yes	yes	yes	yes	yes	yes	yes	yes	yes	yes	yes	yes	yes	yes	yes	yes	hateful	yes	yes	yes	hateful	hateful	yes	yes	yes	hateful	yes	yes	yes	hateful	yes	yes	hateful	yes	yes	yes	hateful	hateful	yes	yes	yes	hateful	hateful	hateful	yes	yes	a).
The following statement was labeled non-hateful by 50% annotators: <user> <user> when i saw video of her family members walking in the courtroom they all looked like white supremacist klansmen especially the males they did not look like they were used to wearing suits they d be more comfortable in white robes . Is the given statement hateful?	1	no	no	no	no	no	no	no	non-hateful	non-hateful	hateful	yes	no	no	yes	non-hateful	no	hateful	no	no	no	no	yes	non-hateful	yes	no	no	non-hateful	no	no	no	yes	yes	non-hateful	yes	yes	no	hateful	no	no	no	non-hateful	non-hateful	no	hateful	no	yes	yes	no
The following statement was labeled non-hateful by 50% annotators: scroll down my timeline slut bragging about getting a professional white basketball player to pay for her nigglet bastard after the father ran off pol ran her off . Is the given statement hateful?	0	yes	yes	yes	yes	yes	yes	yes	yes	yes	yes	yes	yes	yes	yes	yes	yes	yes	yes	yes	yes	non-hateful	no	yes	yes	yes	yes	yes	yes	yes	yes	yes	no	yes	no	yes	hateful	no	yes	hateful	yes	yes	no	no	yes	hateful	no	yes	hateful
The following statement was labeled non-hateful by 50% annotators: real madrid is a fucking joke bro 😂 . Is the given statement hateful?	1	yes	yes	hateful	yes	yes	yes	yes	hateful	no	no	no	yes	yes	no	yes	yes	non-hateful	yes	yes	yes	no	non-hateful	no	yes	yes	no	hateful	yes	no	hateful	yes	non-hateful	hateful	no	hateful	no	no	no	no	yes	yes	hateful	yes	no	hateful	hateful	no	non-hateful
The following statement was labeled non-hateful by 50% annotators: <user> let us some queer person goes on publicly to say that all straight people should be killed would it be ok because reverse homophobia does not exist 🙄 . Is the given statement hateful?	1	non-hateful	non-hateful	non-hateful	non-hateful	non-hateful	non-hateful	non-hateful	non-hateful	non-hateful	non-hateful	non-hateful	non-hateful	non-hateful	non-hateful	non-hateful	non-hateful	non-hateful	non-hateful	non-hateful	non-hateful	non-hateful	non-hateful	yes	non-hateful	non-hateful	non-hateful	no	yes	non-hateful	no	non-hateful	no	non-hateful	no	non-hateful	no	hateful	non-hateful	no	non-hateful	non-hateful	yes	non-hateful	non-hateful	no	non-hateful	non-hateful	hateful
The following statement was labeled non-hateful by 50% annotators: i listen to the same songs everyday i love ariana and blackpink 😩 can they and selena release new albums please . Is the given statement hateful?	1	non-hateful	non-hateful	non-hateful	non-hateful	non-hateful	non-hateful	non-hateful	non-hateful	non-hateful	non-hateful	non-hateful	non-hateful	no	non-hateful	non-hateful	non-hateful	non-hateful	non-hateful	non-hateful	non-hateful	non-hateful	no	no	non-hateful	non-hateful	no	no	non-hateful	no	non-hateful	no	non-hateful	non-hateful	non-hateful	non-hateful	no	no	non-hateful	non-hateful	non-hateful	no	no	non-hateful	non-hateful	non-hateful	non-hateful	no	non-hateful
The following statement was labeled non-hateful by 50% annotators: i am hoping this will clean out a lot of the shit in houston like katrina did with new orleans louisiana just used katrina to dump all of their niggers in houston and crime rates went through the fucking roof . Is the given statement hateful?	0	yes	yes	yes	yes	yes	yes	hateful	yes	yes	yes	yes	yes	no	yes	yes	yes	yes	yes	yes	no	yes	yes	yes	yes	yes	yes	hateful	yes	yes	no	yes	hateful	no	yes	hateful	no	no	yes	hateful	yes	no	non-hateful	yes	no	hateful	hateful	no	no
The following statement was labeled non-hateful by 50% annotators: why don ’ t we make a separate country for illegal aliens and call it mexico . Is the given statement hateful?	1	no	no	no	no	no	no	no	no	no	non-hateful	no	no	non-hateful	non-hateful	non-hateful	yes	yes	no	no	no	yes	no	no	no	non-hateful	non-hateful	no	non-hateful	no	yes	no	hateful	no	non-hateful	no	non-hateful	hateful	non-hateful	no	no	yes	non-hateful	no	no	no	non-hateful	no	no
The following statement was labeled non-hateful by 50% annotators: deport hogg wetback dyke . Is the given statement hateful?	0	yes	yes	yes	yes	yes	yes	yes	yes	yes	yes	yes	yes	yes	yes	yes	yes	yes	yes	yes	yes	yes	yes	yes	yes	yes	yes	hateful	yes	yes	yes	yes	yes	yes	yes	yes	yes	yes	yes	yes	yes	yes	yes	yes	yes	yes	hateful	no	yes
The following statement was labeled non-hateful by 50% annotators: <user> sur <number> <number> regrette women cheat with their ❤ ️ 🤷 🏽 ‍ ♀ ️ . Is the given statement hateful?	1	non-hateful	non-hateful	no	no	non-hateful	non-hateful	non-hateful	non-hateful	non-hateful	no	no	no	non-hateful	no	yes	no	non-hateful	non-hateful	non-hateful	non-hateful	no	hateful	no	non-hateful	no	non-hateful	no	hateful	no	no	non-hateful	no	no	no	hateful	no	no	non-hateful	non-hateful	yes	non-hateful	non-hateful	non-hateful	non-hateful	no	non-hateful	yes	yes
The following statement was labeled non-hateful by 50% annotators: <user> ❝ i hate you so fucking much max you better not talk about this with anyone ❞ . Is the given statement hateful?	1	yes	yes	yes	yes	yes	yes	yes	yes	yes	yes	yes	yes	yes	yes	yes	yes	yes	yes	yes	hateful	yes	yes	yes	yes	yes	yes	hateful	yes	yes	yes	yes	yes	hateful	yes	hateful	yes	hateful	yes	yes	yes	hateful	hateful	yes	yes	hateful	non-hateful	yes	yes
The following statement was labeled non-hateful by 50% annotators: <user> they found the violent nazis organizing the riots . Is the given statement hateful?	1	non-hateful	non-hateful	non-hateful	non-hateful	non-hateful	non-hateful	non-hateful	non-hateful	non-hateful	non-hateful	non-hateful	non-hateful	non-hateful	non-hateful	non-hateful	non-hateful	yes	non-hateful	non-hateful	non-hateful	non-hateful	non-hateful	non-hateful	non-hateful	non-hateful	non-hateful	non-hateful	non-hateful	non-hateful	yes	yes	hateful	non-hateful	non-hateful	non-hateful	non-hateful	non-hateful	non-hateful	non-hateful	non-hateful	no	non-hateful	yes	non-hateful	non-hateful	non-hateful	non-hateful	non-hateful
The following statement was labeled non-hateful by 50% annotators: goddamnit <user> you delete this stuff rn that nigger bitch <user> is not worth it i wish i were a man rn i would so go after that fat black cunt just because . Is the given statement hateful?	0	yes	yes	yes	yes	yes	yes	yes	yes	yes	yes	yes	yes	yes	yes	yes	yes	yes	yes	yes	yes	yes	yes	yes	yes	yes	yes	yes	yes	yes	yes	yes	yes	yes	yes	yes	hateful	yes	yes	yes	yes	yes	yes	yes	yes	yes	yes	yes	yes
The following statement was labeled non-hateful by 50% annotators: never forget kim petras defended the dude that drugged and raped kesha . Is the given statement hateful?	1	non-hateful	no	no	no	non-hateful	yes	non-hateful	yes	non-hateful	no	no	yes	non-hateful	no	no	non-hateful	hateful	non-hateful	no	non-hateful	non-hateful	non-hateful	yes	yes	non-hateful	non-hateful	non-hateful	yes	hateful	no	no	non-hateful	yes	no	yes	non-hateful	non-hateful	yes	no	no	non-hateful	yes	non-hateful	yes	no	yes	hateful	no
The following statement was labeled non-hateful by 50% annotators: a true muslim who follow quran cannot possess humanity . Is the given statement hateful?	0	no	no	no	no	no	no	no	non-hateful	no	no	no	no	no	no	no	no	non-hateful	no	no	no	no	non-hateful	non-hateful	no	non-hateful	non-hateful	non-hateful	no	non-hateful	non-hateful	no	hateful	no	non-hateful	no	non-hateful	yes	no	no	no	non-hateful	no	non-hateful	no	no	no	no	no
The following statement was labeled non-hateful by 50% annotators: exactly i d rather die than have a nigger or sandnigger doctor . Is the given statement hateful?	0	yes	yes	yes	yes	yes	yes	yes	yes	yes	yes	yes	yes	yes	yes	yes	yes	yes	yes	yes	yes	yes	hateful	hateful	hateful	yes	hateful	yes	hateful	yes	hateful	hateful	yes	hateful	yes	yes	hateful	hateful	yes	yes	no	yes	a).	yes	no	yes	yes	yes	yes
The following statement was labeled non-hateful by 50% annotators: we are not offended by the counter semitism if you are not outraged by what elite jews are doing to white countries you are not paying attention . Is the given statement hateful?	0	non-hateful	non-hateful	non-hateful	yes	non-hateful	non-hateful	yes	yes	non-hateful	non-hateful	non-hateful	non-hateful	non-hateful	non-hateful	non-hateful	non-hateful	non-hateful	yes	hateful	non-hateful	hateful	non-hateful	hateful	non-hateful	no	hateful	yes	non-hateful	no	yes	no	non-hateful	hateful	no	hateful	hateful	hateful	non-hateful	non-hateful	no	hateful	non-hateful	non-hateful	hateful	non-hateful	non-hateful	non-hateful	hateful
The following statement was labeled non-hateful by 50% annotators: <user> we are the satanic sluts your parents warned you about . Is the given statement hateful?	1	yes	yes	yes	yes	yes	yes	yes	yes	yes	yes	yes	yes	yes	yes	hateful	yes	yes	yes	hateful	hateful	yes	yes	hateful	yes	hateful	yes	non-hateful	yes	no	yes	hateful	no	yes	no	yes	hateful	yes	yes	yes	no	yes	yes	non-hateful	hateful	yes	yes	hateful	not possible to tell
The following statement was labeled non-hateful by 50% annotators: <user> <user> living on the blood and sweat of illegal and exploited immigrants is not something to be proud of . Is the given statement hateful?	1	non-hateful	non-hateful	non-hateful	no	non-hateful	non-hateful	non-hateful	non-hateful	non-hateful	non-hateful	non-hateful	non-hateful	yes	non-hateful	non-hateful	non-hateful	non-hateful	hateful	no	non-hateful	non-hateful	non-hateful	yes	hateful	yes	yes	non-hateful	non-hateful	hateful	no	non-hateful	non-hateful	no	non-hateful	hateful	yes	yes	no	non-hateful	no	yes	non-hateful	hateful	no	no	no	non-hateful	yes
The following statement was labeled non-hateful by 50% annotators: still thinking bout how camila was on x factor calling 5 h her sisters but in facebook making fun of the other girls with her friend calling them niggers i will dsl her clown nose 🤡 . Is the given statement hateful?	1	yes	yes	yes	yes	yes	yes	yes	yes	yes	yes	yes	yes	yes	yes	yes	yes	yes	yes	non-hateful	yes	yes	yes	no	yes	yes	yes	yes	yes	yes	yes	yes	non-hateful	yes	yes	no	non-hateful	yes	yes	Yes	no	yes	yes	yes	yes	yes	hateful	hateful	non-hateful
The following statement was labeled non-hateful by 50% annotators: why are they calling muzzrats asians disingenuous as hell . Is the given statement hateful?	0	yes	yes	yes	yes	yes	yes	non-hateful	yes	yes	yes	yes	hateful	no	yes	yes	yes	hateful	non-hateful	yes	non-hateful	yes	yes	hateful	yes	no	yes	non-hateful	yes	yes	yes	yes	hateful	yes	yes	yes	yes	hateful	yes	yes	yes	yes	yes	no	no	hateful	yes	yes	hateful
The following statement was labeled non-hateful by 50% annotators: yeah try bitch and i will shove an ar15 up your snow nigger ass . Is the given statement hateful?	0	yes	yes	yes	yes	yes	yes	yes	yes	yes	yes	yes	yes	yes	yes	yes	yes	yes	yes	yes	yes	yes	yes	yes	yes	no	yes	yes	yes	yes	yes	hateful	yes	yes	hateful	yes	hateful	yes	yes	yes	yes	yes	yes	hateful	hateful	yes	no	hateful	yes
The following statement was labeled non-hateful by 50% annotators: if there are legal immigrants who can enter the country properly and wait to get citizenship what the excuse of those who come here illegally answer there is none america wants legal immigrants who will help the country thrive not a bunch of freeloaders looking for handouts . Is the given statement hateful?	1	yes	yes	no	no	no	no	non-hateful	no	yes	non-hateful	yes	yes	yes	yes	yes	yes	no	yes	no	no	no	non-hateful	yes	yes	non-hateful	yes	no	yes	no	no	no	yes	yes	yes	yes	non-hateful	yes	non-hateful	hateful	yes	non-hateful	yes	yes	non-hateful	no	yes	yes	non-hateful
The following statement was labeled non-hateful by 50% annotators: trumps calls shitskin countries shitholes and is lauded as a hero hillary called blacks super predators but is still a villain the power of kike brainwashing . Is the given statement hateful?	0	yes	yes	yes	yes	yes	yes	yes	yes	yes	yes	yes	yes	no	yes	yes	yes	yes	yes	yes	no	hateful	hateful	yes	yes	no	yes	yes	yes	hateful	hateful	no	hateful	no	non-hateful	hateful	no	yes	hateful	hateful	yes	yes	yes	hateful	yes	hateful	hateful	yes	no
The following statement was labeled non-hateful by 50% annotators: red velvet got called black old and homophobic all by their own fandom i can ’ t 😭 . Is the given statement hateful?	1	non-hateful	non-hateful	non-hateful	non-hateful	no	non-hateful	non-hateful	non-hateful	no	no	non-hateful	no	non-hateful	non-hateful	no	non-hateful	non-hateful	non-hateful	yes	no	yes	non-hateful	non-hateful	yes	no	no	non-hateful	non-hateful	yes	non-hateful	non-hateful	no	non-hateful	no	hateful	yes	no	hateful	yes	yes	non-hateful	non-hateful	non-hateful	non-hateful	non-hateful	i.	non-hateful	yes
The following statement was labeled non-hateful by 50% annotators: spending addiction i pay all cash no need for the atm that for ma mama she scared niggas might rob her . Is the given statement hateful?	1	no	no	no	no	no	no	no	no	no	no	non-hateful	non-hateful	no	no	no	yes	no	non-hateful	no	no	no	no	yes	no	no	no	non-hateful	no	yes	no	yes	no	non-hateful	non-hateful	no	non-hateful	yes	no	hateful	non-hateful	no	hateful	no	hateful	non-hateful	hateful	non-hateful	yes
The following statement was labeled non-hateful by 50% annotators: men who refer to women as females steal . Is the given statement hateful?	1	no	no	no	no	no	no	no	no	non-hateful	yes	no	non-hateful	no	non-hateful	no	no	no	no	no	no	non-hateful	no	no	non-hateful	non-hateful	no	non-hateful	non-hateful	no	no	[ii]	no	a).	none	no	no	yes	no	non-hateful	non-hateful	no	no	no	no	non-hateful	non-hateful	no	no
The following statement was labeled non-hateful by 50% annotators: i gotta say as a woman i love it and white boys can not get hired these days because of these cunt feminazi demanding diversity choosing shitskins over kin not that i want to see our men reduced to this but payback is a bitch . Is the given statement hateful?	0	yes	yes	yes	yes	yes	yes	yes	yes	hateful	yes	yes	yes	yes	no	yes	yes	yes	no	yes	hateful	yes	yes	hateful	no	yes	yes	yes	yes	no	hateful	no	yes	yes	no	yes	hateful	yes	yes	yes	yes	hateful	no	yes	Yes	yes	1).	hateful	no
The following statement was labeled non-hateful by 50% annotators: <user> tbh i was really disappointed when my husband friend dykey sister did not show up and make sweet love to me on my granite kitchen island 😔 . Is the given statement hateful?	1	no	no	non-hateful	non-hateful	non-hateful	non-hateful	non-hateful	no	no	non-hateful	no	non-hateful	no	no	no	non-hateful	no	no	non-hateful	non-hateful	non-hateful	non-hateful	non-hateful	non-hateful	no	no	non-hateful	no	no	non-hateful	no	non-hateful	no	no	yes	non-hateful	non-hateful	no	no	no	non-hateful	no	non-hateful	non-hateful	non-hateful	yes	#dyke	non-hateful
The following statement was labeled non-hateful by 50% annotators: this movie is ghetto . Is the given statement hateful?	1	no	no	yes	yes	yes	no	yes	yes	no	no	no	no	yes	no	yes	yes	yes	hateful	yes	no	no	yes	yes	no	no	non-hateful	no	non-hateful	no	yes	yes	yes	no	no	no	yes	yes	yes	hateful	no	yes	hateful	no	non-hateful	yes	hateful	non-hateful	no
The following statement was labeled non-hateful by 50% annotators: typical nigger father breed them then leave them . Is the given statement hateful?	0	yes	yes	yes	yes	yes	yes	yes	yes	yes	yes	yes	yes	yes	yes	yes	yes	yes	hateful	yes	hateful	yes	yes	yes	hateful	hateful	yes	yes	yes	yes	yes	yes	yes	yes	hateful	yes	yes	hateful	yes	yes	hateful	yes	yes	yes	yes	yes	hateful	yes	yes
The following statement was labeled non-hateful by 50% annotators: news for tacha fans who support pride violence arrogance insolence and bad behaviour your girl has been disqualified for all her supposedly good attitude at the <user> the nigerian people are not known for all these we do not condone such behaviours bb naija . Is the given statement hateful?	1	non-hateful	no	non-hateful	non-hateful	no	no	no	non-hateful	non-hateful	no	no	no	non-hateful	no	yes	non-hateful	non-hateful	non-hateful	no	non-hateful	no	non-hateful	no	no	no	no	non-hateful	non-hateful	no	no	no	no	non-hateful	non-hateful	no	no	no	no	no	non-hateful	non-hateful	non-hateful	non-hateful	non-hateful	yes	no	non-hateful	no
The following statement was labeled non-hateful by 50% annotators: lmao wow they really do not allow you to go around calling people kike on twitter anymore lmfao banned again . Is the given statement hateful?	1	no	no	no	no	no	no	no	yes	yes	no	no	no	no	no	yes	yes	yes	non-hateful	no	no	yes	no	yes	no	no	no	yes	hateful	no	yes	no	non-hateful	no	yes	yes	hateful	no	yes	no	non-hateful	no	yes	no	no	no	no	yes	non-hateful
The following statement was labeled non-hateful by 50% annotators: i think spicer is going to need to start using videos and charts and graphs to really teach the media the truth about issues like violence in chicago violent immigrants etc mere words are not enough the narrative in their heads is too strong . Is the given statement hateful?	1	non-hateful	non-hateful	non-hateful	non-hateful	non-hateful	non-hateful	non-hateful	non-hateful	non-hateful	non-hateful	non-hateful	non-hateful	non-hateful	non-hateful	non-hateful	non-hateful	non-hateful	non-hateful	non-hateful	non-hateful	non-hateful	non-hateful	non-hateful	non-hateful	non-hateful	non-hateful	non-hateful	non-hateful	non-hateful	non-hateful	no	non-hateful	no	non-hateful	non-hateful	no	non-hateful	non-hateful	non-hateful	non-hateful	non-hateful	no	no	non-hateful	no	non-hateful	non-hateful	non-hateful
The following statement was labeled non-hateful by 50% annotators: that bitch ass nigger <user> illis wont debate me its scared of yt making it look like a fool . Is the given statement hateful?	0	yes	yes	yes	yes	yes	yes	yes	yes	yes	yes	yes	yes	yes	yes	yes	yes	yes	yes	yes	yes	yes	yes	yes	yes	hateful	hateful	yes	yes	yes	yes	yes	hateful	yes	yes	hateful	yes	hateful	yes	yes	hateful	yes	hateful	yes	yes	no	yes	yes	a).
The following statement was labeled non-hateful by 50% annotators: you are banned remember white boy . Is the given statement hateful?	1	yes	yes	yes	yes	no	yes	yes	yes	yes	yes	yes	yes	hateful	yes	no	no	hateful	yes	no	no	yes	yes	yes	no	non-hateful	no	no	no	no	no	hateful	no	no	no	yes	yes	non-hateful	no	no	no	hateful	no	non-hateful	yes	hateful	hateful	non-hateful	yes
The following statement was labeled non-hateful by 50% annotators: i have reasons to dislike them and some reasons to like them i take the good with the bad if you have a specific answer i can answer it but i d like to remain in the holocaust subject if you do not mind . Is the given statement hateful?	1	non-hateful	non-hateful	non-hateful	non-hateful	non-hateful	non-hateful	non-hateful	non-hateful	non-hateful	non-hateful	non-hateful	non-hateful	no	no	non-hateful	non-hateful	non-hateful	non-hateful	non-hateful	non-hateful	non-hateful	non-hateful	no	non-hateful	no	no	non-hateful	non-hateful	no	no	non-hateful	non-hateful	non-hateful	no	non-hateful	non-hateful	non-hateful	non-hateful	non-hateful	no	non-hateful	non-hateful	no	no	non-hateful	non-hateful	no	non-hateful
The following statement was labeled non-hateful by 50% annotators: <user> <user> <user> it was way better than sonoma if you remember your redneck jesus won the glenn also . Is the given statement hateful?	1	no	yes	no	yes	no	non-hateful	no	yes	no	yes	yes	non-hateful	no	yes	yes	no	no	non-hateful	non-hateful	non-hateful	no	no	no	no	yes	no	non-hateful	yes	no	non-hateful	yes	yes	yes	no	yes	no	yes	no	no	yes	no	no	no	yes	no	yes	no	hateful
The following statement was labeled non-hateful by 50% annotators: tradition the most brutal fights every black friday can be found at walmart usually triggered by minorities fighting over shit made in china i do not care for my fellow asians much but i would trade all this ghetto trash in for boatloads of japanese and koreans speekfreely maga gabfam . Is the given statement hateful?	0	non-hateful	no	non-hateful	no	yes	no	yes	non-hateful	non-hateful	no	no	no	non-hateful	yes	non-hateful	non-hateful	no	non-hateful	yes	non-hateful	non-hateful	no	no	non-hateful	non-hateful	no	non-hateful	yes	yes	no	no	yes	yes	no	no	non-hateful	non-hateful	non-hateful	no	yes	yes	no	yes	no	yes	no	no	yes
The following statement was labeled non-hateful by 50% annotators: <user> yeah cuz incel violence is a fucking epidemic and movies cause violence this joker outrage is just stupid it only a movie chill . Is the given statement hateful?	1	no	yes	yes	no	non-hateful	no	no	non-hateful	no	yes	non-hateful	non-hateful	no	yes	yes	yes	yes	non-hateful	yes	non-hateful	no	yes	non-hateful	no	yes	yes	hateful	non-hateful	no	no	no	non-hateful	non-hateful	no	yes	no	non-hateful	non-hateful	no	yes	yes	yes	hateful	no	yes	yes	hateful	yes
The following statement was labeled non-hateful by 50% annotators: she is referring to the de niro projects financed for or by kike rapist harvey weinstein it helps if you took english reading classes dummy . Is the given statement hateful?	0	yes	yes	yes	yes	yes	yes	yes	yes	yes	hateful	yes	yes	yes	hateful	yes	yes	yes	yes	yes	yes	yes	yes	yes	yes	yes	yes	hateful	yes	yes	yes	yes	hateful	no	hateful	yes	yes	yes	hateful	yes	yes	hateful	no	yes	hateful	yes	yes	yes	hateful
The following statement was labeled non-hateful by 50% annotators: we will keep our way you guys can keep your muzzies and grooming gangs . Is the given statement hateful?	0	yes	yes	yes	yes	yes	yes	yes	yes	yes	hateful	yes	yes	yes	yes	yes	yes	no	yes	yes	yes	yes	hateful	yes	no	hateful	yes	yes	yes	no	hateful	yes	hateful	hateful	yes	yes	1).	yes	yes	hateful	hateful	hateful	hateful	yes	yes	yes	yes	no	yes
The following statement was labeled non-hateful by 50% annotators: larry says <date> at <time> a closet raghead is certainly a possibility i would not rule out and where in the philippines is the girlfriend originally from if she from zamboanga or cotabato that would raise a big red flag because that raghead territory . Is the given statement hateful?	0	yes	yes	no	yes	yes	yes	yes	yes	yes	yes	yes	no	yes	non-hateful	yes	yes	yes	no	yes	no	no	no	non-hateful	yes	yes	no	no	yes	non-hateful	no	yes	yes	no	no	no	yes	yes	no	no	yes	yes	no	yes	no	non-hateful	yes	yes	yes
The following statement was labeled non-hateful by 50% annotators: libtard men are getting pap smears and libtard women are getting their peni enlarged . Is the given statement hateful?	0	yes	yes	yes	yes	yes	yes	yes	yes	yes	yes	yes	yes	yes	yes	yes	yes	yes	yes	yes	yes	yes	yes	yes	non-hateful	yes	yes	yes	yes	yes	yes	yes	yes	yes	yes	no	yes	yes	no	yes	yes	yes	yes	yes	yes	yes	yes	yes	non-hateful
The following statement was labeled non-hateful by 50% annotators: i almost went on holiday to amsterdam this year but with the muzzie invasion just did not feel safe doing it now i am grounded and only drive wyoming here i come this spring summer . Is the given statement hateful?	0	no	no	no	no	no	no	no	no	no	no	no	non-hateful	no	no	non-hateful	no	no	no	no	no	no	no	no	no	non-hateful	non-hateful	non-hateful	non-hateful	no	no	non-hateful	no	non-hateful	non-hateful	no	no	hateful	yes	non-hateful	no	yes	no	non-hateful	non-hateful	no	no	no	no
The following statement was labeled non-hateful by 50% annotators: over <number> undocumented immigrants living in california were granted driver licenses in <number> due to california state law ab60 the california department of motor vehicles dmv expects that at least <number> million illegal migrants will be issued a driver license under the law by late <number> . Is the given statement hateful?	1	non-hateful	non-hateful	non-hateful	non-hateful	non-hateful	non-hateful	non-hateful	non-hateful	no	non-hateful	non-hateful	non-hateful	non-hateful	non-hateful	non-hateful	no	non-hateful	no	non-hateful	non-hateful	non-hateful	non-hateful	non-hateful	non-hateful	no	no	non-hateful	no	non-hateful	non-hateful	no	no	non-hateful	no	non-hateful	non-hateful	no	non-hateful	no	non-hateful	no	non-hateful	non-hateful	non-hateful	no	non-hateful	no	non-hateful
The following statement was labeled non-hateful by 50% annotators: shivaji companion during his fabled escape from the mughal internment in agra was madari mehtar — a muslim shivaji even extended courtesy to sworn enemies like afzal khan 21 st century rss rss roadmaps . Is the given statement hateful?	1	non-hateful	non-hateful	non-hateful	non-hateful	non-hateful	non-hateful	non-hateful	non-hateful	non-hateful	non-hateful	non-hateful	non-hateful	non-hateful	non-hateful	non-hateful	non-hateful	non-hateful	non-hateful	non-hateful	non-hateful	non-hateful	non-hateful	non-hateful	non-hateful	non-hateful	non-hateful	non-hateful	no	non-hateful	non-hateful	non-hateful	non-hateful	non-hateful	non-hateful	no	non-hateful	non-hateful	non-hateful	non-hateful	no	non-hateful	non-hateful	non-hateful	non-hateful	non-hateful	non-hateful	non-hateful	non-hateful
The following statement was labeled non-hateful by 50% annotators: <user> <user> he ’ gay himself . Is the given statement hateful?	1	non-hateful	non-hateful	non-hateful	non-hateful	non-hateful	non-hateful	non-hateful	non-hateful	non-hateful	non-hateful	non-hateful	non-hateful	non-hateful	non-hateful	non-hateful	non-hateful	non-hateful	non-hateful	non-hateful	non-hateful	non-hateful	no	non-hateful	non-hateful	non-hateful	non-hateful	non-hateful	no	non-hateful	non-hateful	non-hateful	non-hateful	non-hateful	no	non-hateful	non-hateful	no	non-hateful	non-hateful	no	non-hateful	yes	non-hateful	non-hateful	non-hateful	non-hateful	non-hateful	non-hateful
The following statement was labeled non-hateful by 50% annotators: so talking of intellectual ghettos in an age in which simply being white and not a screaming leftist ghettoizes one as a white supremacist so what being called something anyway w o even enjoying the advantages of actually being one seems something of a waste . Is the given statement hateful?	1	non-hateful	non-hateful	non-hateful	non-hateful	non-hateful	non-hateful	non-hateful	non-hateful	non-hateful	non-hateful	no	non-hateful	non-hateful	no	non-hateful	non-hateful	non-hateful	non-hateful	non-hateful	non-hateful	no	no	non-hateful	non-hateful	non-hateful	no	yes	non-hateful	no	non-hateful	non-hateful	non-hateful	no	non-hateful	non-hateful	non-hateful	non-hateful	no	no	non-hateful	non-hateful	non-hateful	non-hateful	non-hateful	no	no	non-hateful	non-hateful
The following statement was labeled non-hateful by 50% annotators: <user> please do not kill yourself 😔 . Is the given statement hateful?	1	non-hateful	non-hateful	non-hateful	non-hateful	non-hateful	non-hateful	non-hateful	non-hateful	non-hateful	non-hateful	non-hateful	non-hateful	non-hateful	non-hateful	non-hateful	non-hateful	no	non-hateful	non-hateful	non-hateful	non-hateful	non-hateful	non-hateful	non-hateful	non-hateful	no	no	non-hateful	non-hateful	non-hateful	non-hateful	non-hateful	no	no	non-hateful	no	non-hateful	no	non-hateful	non-hateful	non-hateful	no	non-hateful	non-hateful	no	no	non-hateful	non-hateful
The following statement was labeled non-hateful by 50% annotators: cuz civic nationalism does not work diversity inherently creates conflict and for every <number> 2 nd 3 rd gen immigrant who wants to become american <number> do not humans are inherently tribal civic nationalism tries to undo this in favor of creating a tribe around a flag but it fights human nature loses . Is the given statement…	1	non-hateful	non-hateful	non-hateful	non-hateful	non-hateful	non-hateful	non-hateful	non-hateful	non-hateful	non-hateful	non-hateful	non-hateful	non-hateful	non-hateful	non-hateful	no	non-hateful	no	no	non-hateful	non-hateful	non-hateful	no	no	no	non-hateful	no	non-hateful	non-hateful	no	non-hateful	non-hateful	non-hateful	no	non-hateful	non-hateful	non-hateful	non-hateful	non-hateful	no	no	no	non-hateful	no	non-hateful	no	non-hateful	yes
The following statement was labeled non-hateful by 50% annotators: all these niggas is parrots . Is the given statement hateful?	1	yes	yes	yes	yes	yes	yes	yes	yes	yes	yes	yes	yes	yes	yes	yes	yes	yes	yes	yes	yes	hateful	yes	hateful	yes	hateful	hateful	yes	hateful	yes	yes	hateful	hateful	yes	yes	yes	yes	yes	hateful	yes	yes	hateful	yes	hateful	hateful	yes	yes	no	yes
The following statement was labeled non-hateful by 50% annotators: maria bartiromo at record speed and extremists have to host refugees as this administration over <number> legislation approvals . Is the given statement hateful?	1	non-hateful	non-hateful	non-hateful	non-hateful	non-hateful	non-hateful	non-hateful	non-hateful	non-hateful	non-hateful	non-hateful	non-hateful	non-hateful	non-hateful	non-hateful	non-hateful	non-hateful	non-hateful	no	non-hateful	non-hateful	non-hateful	non-hateful	non-hateful	no	no	non-hateful	non-hateful	non-hateful	no	non-hateful	no	non-hateful	no	non-hateful	non-hateful	non-hateful	non-hateful	no	no	non-hateful	non-hateful	non-hateful	not enough information	no	non-hateful	no	non-hateful
The following statement was labeled non-hateful by 50% annotators: nigger porch monkey tree fruit neggra niggress ol black joe . Is the given statement hateful?	0	yes	yes	yes	yes	yes	yes	yes	yes	yes	yes	yes	yes	yes	yes	yes	yes	yes	yes	yes	yes	yes	yes	yes	yes	yes	yes	yes	hateful	yes	yes	yes	yes	yes	yes	no	no	yes	yes	yes	yes	yes	hateful	yes	yes	yes	yes	yes	yes
The following statement was labeled non-hateful by 50% annotators: what you support obvious fed niggershill kike wignat pipebombers good . Is the given statement hateful?	0	yes	yes	yes	yes	yes	yes	yes	yes	yes	yes	yes	yes	yes	yes	yes	yes	yes	yes	yes	yes	yes	yes	yes	no	hateful	yes	yes	yes	hateful	yes	a).	hateful	yes	yes	yes	yes	no	yes	yes	hateful	hateful	yes	yes	yes	yes	yes	yes	yes
The following statement was labeled non-hateful by 50% annotators: if a hard border goes up there will be violence they just tryna make it seem like we brought it upon ourselves . Is the given statement hateful?	1	non-hateful	non-hateful	non-hateful	non-hateful	non-hateful	non-hateful	no	non-hateful	non-hateful	non-hateful	non-hateful	non-hateful	non-hateful	non-hateful	non-hateful	non-hateful	non-hateful	non-hateful	non-hateful	non-hateful	no	no	no	non-hateful	no	no	non-hateful	no	no	non-hateful	non-hateful	non-hateful	non-hateful	non-hateful	no	no	non-hateful	non-hateful	no	no	non-hateful	non-hateful	non-hateful	no	no	no	no	non-hateful
The following statement was labeled non-hateful by 50% annotators: juan is about as much of a fucking a stupid ass nigger as any juan can get libtards like this fucking nigger black democrat asshole have exhausted their statute of limitations much in the same way that white gop fucking stupid ass feminist bush whore bitches like perino bitchtwat have exhausted theirs . Is the given statement hate…	0	yes	yes	yes	yes	yes	yes	yes	yes	yes	yes	yes	yes	yes	yes	yes	yes	yes	yes	yes	yes	yes	yes	yes	yes	yes	yes	hateful	yes	yes	yes	yes	yes	yes	hateful	yes	hateful	yes	hateful	yes	yes	hateful	hateful	no	yes	yes	yes	yes	yes
The following statement was labeled non-hateful by 50% annotators: <user> what if a muslim refugee lies says that he was persecuted because he had converted to any of these religions but reverts back to islam after getting indian citizenship taklu is fooling bengalis fact is that they dumped citizenship amendment bill after opposition in ne states . Is the given statement hateful?	1	non-hateful	non-hateful	non-hateful	non-hateful	non-hateful	non-hateful	non-hateful	non-hateful	no	non-hateful	non-hateful	non-hateful	non-hateful	non-hateful	non-hateful	non-hateful	non-hateful	non-hateful	no	non-hateful	non-hateful	no	non-hateful	non-hateful	non-hateful	non-hateful	non-hateful	no	non-hateful	no	non-hateful	non-hateful	non-hateful	non-hateful	no	no	non-hateful	no	no	hateful	hateful	non-hateful	no	non-hateful	yes	non-hateful	non-hateful	non-hateful
The following statement was labeled non-hateful by 50% annotators: 🎊 🎊 hindu rashtra by midnight 🎉 🎉 one tight slap for fiberals burnol for jihadis and sickulars 🙏 🙏 thank you modi zee 🙏 🙏 . Is the given statement hateful?	0	yes	yes	yes	yes	yes	yes	yes	yes	hateful	yes	yes	hateful	yes	yes	yes	yes	yes	yes	hateful	hateful	non-hateful	yes	non-hateful	hateful	yes	hateful	yes	yes	yes	no	yes	hateful	non-hateful	yes	hateful	yes	yes	hateful	no	non-hateful	yes	hateful	no	non-hateful	yes	yes	yes	yes
The following statement was labeled non-hateful by 50% annotators: some mudslimes got ran over in london karma is a motherfucker . Is the given statement hateful?	0	yes	yes	yes	yes	yes	yes	yes	yes	yes	yes	yes	yes	yes	yes	yes	yes	yes	yes	yes	yes	yes	yes	yes	hateful	yes	hateful	yes	yes	yes	yes	yes	yes	yes	yes	yes	yes	yes	yes	yes	hateful	yes	yes	yes	hateful	yes	yes	non-hateful	yes
The following statement was labeled non-hateful by 50% annotators: <user> <user> justin trudeau is a jihadi apologist . Is the given statement hateful?	1	non-hateful	non-hateful	non-hateful	non-hateful	non-hateful	non-hateful	non-hateful	non-hateful	non-hateful	non-hateful	non-hateful	non-hateful	non-hateful	non-hateful	non-hateful	non-hateful	non-hateful	non-hateful	non-hateful	non-hateful	non-hateful	non-hateful	non-hateful	non-hateful	non-hateful	non-hateful	non-hateful	non-hateful	non-hateful	non-hateful	non-hateful	non-hateful	non-hateful	non-hateful	no	non-hateful	no	no	non-hateful	non-hateful	non-hateful	non-hateful	no	non-hateful	no	non-hateful	non-hateful	non-hateful
The following statement was labeled non-hateful by 50% annotators: <user> you gotta watch ‘ return to paradise ’ with joakin phoenix that shit will have you never doing illegal shit in other countries . Is the given statement hateful?	1	non-hateful	no	non-hateful	non-hateful	non-hateful	non-hateful	no	non-hateful	non-hateful	no	no	no	non-hateful	no	non-hateful	non-hateful	non-hateful	non-hateful	no	no	non-hateful	no	no	non-hateful	no	no	non-hateful	non-hateful	no	no	no	non-hateful	non-hateful	non-hateful	non-hateful	no	no	no	non-hateful	no	no	no	yes	non-hateful	no	non-hateful	non-hateful	non-hateful
The following statement was labeled non-hateful by 50% annotators: let them take the faggots . Is the given statement hateful?	0	yes	yes	yes	yes	yes	yes	yes	yes	yes	yes	yes	yes	yes	yes	yes	yes	yes	hateful	yes	yes	no	yes	yes	yes	yes	hateful	hateful	yes	hateful	yes	yes	yes	yes	yes	yes	yes	hateful	yes	yes	yes	hateful	yes	yes	no	hateful	no	yes	a).
The following statement was labeled non-hateful by 50% annotators: infrastructure is required to get energy from the ground to the socket the wetback vag whose <number> day old bridge collapsed in miami last week might be building power lines next . Is the given statement hateful?	0	no	no	no	no	no	no	no	yes	no	no	no	yes	yes	no	yes	non-hateful	yes	no	no	yes	yes	yes	yes	no	no	yes	hateful	no	no	yes	yes	hateful	no	no	no	no	yes	yes	no	non-hateful	no	non-hateful	yes	yes	hateful	yes	non-hateful	no
The following statement was labeled non-hateful by 50% annotators: a negress too dumb to fuck has a scant chance of understanding anything beyond the size of a dick . Is the given statement hateful?	0	yes	yes	yes	yes	yes	yes	yes	yes	yes	yes	yes	yes	yes	yes	yes	yes	yes	yes	yes	non-hateful	yes	yes	hateful	yes	yes	no	yes	hateful	yes	yes	hateful	yes	hateful	yes	yes	no	non-hateful	hateful	yes	no	yes	yes	no	yes	yes	yes	no	yes
The following statement was labeled non-hateful by 50% annotators: <user> these hoes ain t shit bro u cute as hell . Is the given statement hateful?	1	no	no	no	no	no	no	non-hateful	no	no	no	no	no	non-hateful	no	no	no	no	non-hateful	non-hateful	no	yes	yes	non-hateful	yes	no	no	no	no	no	no	non-hateful	no	no	no	no	non-hateful	non-hateful	no	no	non-hateful	labeled non-	no	no	no	yes	non-hateful	non-hateful	no
The following statement was labeled non-hateful by 50% annotators: breona that my dyke 🤣 . Is the given statement hateful?	1	yes	yes	yes	yes	yes	yes	yes	yes	yes	yes	yes	no	yes	yes	yes	yes	yes	yes	yes	yes	yes	yes	no	yes	yes	yes	yes	yes	yes	no	non-hateful	yes	no	no	no	yes	yes	yes	no	non-hateful	hateful	yes	yes	no	gay people with breasts	non-hateful	yes	no
The following statement was labeled non-hateful by 50% annotators: eat me it a ritual created by the jews to bring their sons closer to god the rabbi literally sucks the bleeding dick fuck off with your pagan rituals . Is the given statement hateful?	0	yes	yes	yes	yes	yes	yes	yes	yes	yes	yes	yes	yes	yes	yes	no	yes	yes	yes	hateful	no	yes	yes	non-hateful	yes	yes	yes	hateful	yes	yes	hateful	yes	yes	yes	yes	yes	yes	yes	yes	non-hateful	hateful	yes	yes	no	yes	yes	hateful	yes	yes
The following statement was labeled non-hateful by 50% annotators: stop telling women what to wear fam it dead . Is the given statement hateful?	1	no	no	non-hateful	non-hateful	non-hateful	non-hateful	non-hateful	no	non-hateful	non-hateful	no	non-hateful	non-hateful	non-hateful	no	no	non-hateful	no	no	non-hateful	non-hateful	no	no	no	yes	non-hateful	non-hateful	no	no	no	non-hateful	no	non-hateful	yes	no	no	non-hateful	no	no	hateful	yes	non-hateful	no	no	yes	no	no	hateful
The following statement was labeled non-hateful by 50% annotators: i forgot to add those poor palestinian towel heads we will ask them how peaceful these so called rat jews are i do not think they will say the jew is very peaceful . Is the given statement hateful?	0	yes	yes	yes	yes	yes	yes	yes	yes	yes	hateful	yes	yes	yes	no	yes	hateful	hateful	yes	yes	yes	yes	yes	hateful	yes	hateful	no	yes	yes	yes	yes	hateful	hateful	yes	no	hateful	hateful	yes	hateful	no	hateful	yes	a).	no	hateful	non-hateful	no	no	hateful
The following statement was labeled non-hateful by 50% annotators: <user> just time to ban all mudslime immigration lets not discriminate against mudslime majorities . Is the given statement hateful?	0	yes	yes	hateful	yes	yes	yes	yes	yes	yes	yes	yes	yes	hateful	yes	hateful	yes	yes	yes	yes	hateful	hateful	hateful	yes	yes	yes	yes	yes	yes	hateful	yes	hateful	yes	yes	hateful	hateful	hateful	yes	hateful	no	yes	hateful	hateful	hateful	hateful	hateful	no	no	yes
The following statement was labeled non-hateful by 50% annotators: <user> he is not a news anchor he is a suck up to d trump maybe even secret gay lovers . Is the given statement hateful?	1	non-hateful	non-hateful	non-hateful	non-hateful	hateful	non-hateful	hateful	yes	non-hateful	non-hateful	yes	non-hateful	no	non-hateful	yes	yes	non-hateful	non-hateful	non-hateful	no	non-hateful	yes	no	no	no	non-hateful	non-hateful	yes	non-hateful	non-hateful	hateful	yes	non-hateful	yes	no	non-hateful	no	hateful	yes	hateful	non-hateful	no	hateful	yes	hateful	hateful	yes	hateful
The following statement was labeled non-hateful by 50% annotators: hope he keeps stressing the point unfortunately the system will most probably get him removed for speaking the truth france is so scared of these invading illegal moslem shite in case they react and run riot even more than they currently do . Is the given statement hateful?	0	yes	yes	yes	yes	yes	yes	yes	yes	yes	yes	yes	yes	hateful	yes	yes	yes	yes	no	yes	yes	yes	yes	yes	hateful	no	hateful	yes	Yes	no	yes	yes	yes	hateful	hateful	non-hateful	yes	hateful	yes	yes	yes	hateful	yes	non-hateful	non-hateful	yes	hateful	hateful	yes
The following statement was labeled non-hateful by 50% annotators: <user> <user> maybe sturgeon will offer her a room at her house along with the syrians refugees . Is the given statement hateful?	1	non-hateful	non-hateful	non-hateful	non-hateful	non-hateful	non-hateful	non-hateful	non-hateful	non-hateful	non-hateful	non-hateful	non-hateful	non-hateful	non-hateful	non-hateful	non-hateful	non-hateful	non-hateful	non-hateful	non-hateful	non-hateful	non-hateful	non-hateful	no	non-hateful	non-hateful	non-hateful	non-hateful	no	non-hateful	non-hateful	non-hateful	non-hateful	non-hateful	non-hateful	no	no	no	non-hateful	non-hateful	non-hateful	non-hateful	non-hateful	no	non-hateful	non-hateful	non-hateful	no
The following statement was labeled non-hateful by 50% annotators: about normal for this little muzrat lover anything to go against this country and the present government while he has a house in london and a six bedroomed manor house with land in the the country of shropshire nice one corbyn you scummy fake socialist . Is the given statement hateful?	0	yes	yes	yes	yes	no	yes	no	yes	yes	yes	yes	yes	yes	hateful	hateful	yes	no	yes	non-hateful	yes	yes	no	yes	no	yes	yes	no	yes	yes	hateful	yes	yes	yes	yes	no	yes	no	hateful	yes	hateful	non-hateful	no	hateful	yes	no	no	yes	yes
The following statement was labeled non-hateful by 50% annotators: so the non european kike won eurovision oh vey look at the fucking state of it . Is the given statement hateful?	0	yes	yes	yes	yes	yes	yes	yes	yes	yes	yes	yes	yes	yes	yes	yes	yes	yes	yes	yes	yes	yes	yes	hateful	yes	yes	yes	yes	yes	yes	yes	yes	yes	hateful	yes	yes	yes	yes	hateful	yes	no	yes	yes	yes	yes	yes	(i)	yes	yes
The following statement was labeled non-hateful by 50% annotators: namjoon black hair ah bbm as top social bts <user> . Is the given statement hateful?	1	non-hateful	non-hateful	non-hateful	non-hateful	non-hateful	non-hateful	non-hateful	non-hateful	non-hateful	non-hateful	non-hateful	no	no	non-hateful	non-hateful	non-hateful	no	no	no	no	no	non-hateful	no	no	non-hateful	no	non-hateful	non-hateful	no	non-hateful	no	non-hateful	no	non-hateful	non-hateful	no	non-hateful	non-hateful	non-hateful	non-hateful	no	non-hateful	non-hateful	no	no	non-hateful	no	no
The following statement was labeled non-hateful by 50% annotators: will i get in trouble for saying nigger or towelhead here . Is the given statement hateful?	0	yes	yes	yes	yes	yes	yes	yes	yes	yes	yes	yes	yes	yes	yes	yes	yes	yes	yes	yes	yes	yes	yes	yes	yes	no	yes	yes	yes	yes	yes	no	yes	no	no	hateful	yes	no	yes	yes	yes	yes	no	yes	yes	yes	yes	hateful	yes
The following statement was labeled non-hateful by 50% annotators: well that really complicated i guess when we have a stable domain i do not know when that will be iceland is trying to kike us right now . Is the given statement hateful?	0	no	no	no	no	no	no	no	no	no	no	no	no	non-hateful	no	non-hateful	no	no	non-hateful	no	non-hateful	no	no	no	no	no	yes	no	no	no	non-hateful	no	non-hateful	no	non-hateful	no	no	no	no	yes	yes	no	no	yes	hateful	no	no	no	no
The following statement was labeled non-hateful by 50% annotators: <user> rules are rules leave the ghetto at the door when you walk in . Is the given statement hateful?	1	non-hateful	non-hateful	non-hateful	non-hateful	non-hateful	non-hateful	non-hateful	non-hateful	no	non-hateful	non-hateful	non-hateful	non-hateful	non-hateful	no	non-hateful	no	no	non-hateful	non-hateful	non-hateful	non-hateful	non-hateful	non-hateful	non-hateful	non-hateful	non-hateful	no	non-hateful	non-hateful	non-hateful	non-hateful	no	non-hateful	non-hateful	non-hateful	no	non-hateful	no	no	non-hateful	non-hateful	yes	non-hateful	non-hateful	non-hateful	non-hateful	non-hateful
The following statement was labeled non-hateful by 50% annotators: even nigger parents do not want their nigger kids going to schools with large numbers of nigger teachers and nigger students . Is the given statement hateful?	0	yes	yes	hateful	yes	yes	yes	yes	yes	hateful	hateful	yes	yes	yes	yes	yes	yes	hateful	hateful	yes	hateful	yes	hateful	hateful	hateful	hateful	yes	yes	hateful	yes	yes	hateful	hateful	hateful	hateful	yes	hateful	yes	hateful	hateful	yes	hateful	yes	no	yes	yes	hateful	yes	hateful
The following statement was labeled non-hateful by 50% annotators: or velcro headed shit skin darkies 🤔 . Is the given statement hateful?	0	yes	yes	yes	yes	yes	yes	yes	yes	yes	yes	yes	yes	yes	yes	yes	yes	yes	yes	yes	yes	yes	yes	yes	yes	yes	no	yes	yes	yes	yes	yes	yes	hateful	yes	hateful	yes	yes	yes	yes	yes	hateful	yes	yes	yes	yes	no	yes	hateful
The following statement was labeled non-hateful by 50% annotators: far left and far right will eventually embrace violence and mutually destroy one another possibly leaving the path clear for a truly sustainable egalitarian society you are all being played so goddamn hard it hilarious . Is the given statement hateful?	1	non-hateful	non-hateful	non-hateful	non-hateful	non-hateful	non-hateful	non-hateful	non-hateful	non-hateful	no	non-hateful	non-hateful	non-hateful	non-hateful	non-hateful	no	non-hateful	non-hateful	no	non-hateful	non-hateful	no	non-hateful	no	no	no	no	non-hateful	non-hateful	non-hateful	non-hateful	non-hateful	non-hateful	non-hateful	non-hateful	no	non-hateful	no	non-hateful	non-hateful	non-hateful	non-hateful	non-hateful	non-hateful	non-hateful	non-hateful	non-hateful	non-hateful
The following statement was labeled non-hateful by 50% annotators: <user> progressives who want gun safety laws and who want immigrants . Is the given statement hateful?	1	non-hateful	non-hateful	non-hateful	non-hateful	non-hateful	non-hateful	non-hateful	non-hateful	non-hateful	non-hateful	non-hateful	non-hateful	non-hateful	non-hateful	non-hateful	non-hateful	non-hateful	non-hateful	non-hateful	non-hateful	non-hateful	non-hateful	non-hateful	non-hateful	non-hateful	non-hateful	non-hateful	non-hateful	non-hateful	non-hateful	non-hateful	non-hateful	non-hateful	non-hateful	non-hateful	no	no	non-hateful	non-hateful	non-hateful	non-hateful	non-hateful	no	no	no	non-hateful	yes	non-hateful
The following statement was labeled non-hateful by 50% annotators: what d ya know the fag the spick and the lesbian on the bench also know the meaning of the first happy days . Is the given statement hateful?	0	yes	yes	yes	yes	yes	yes	yes	yes	yes	yes	yes	hateful	yes	yes	yes	no	yes	yes	yes	yes	yes	yes	yes	yes	yes	non-hateful	yes	yes	yes	yes	yes	no	yes	yes	yes	yes	no	yes	no	hateful	hateful	no	yes	yes	yes	yes	yes	hateful
The following statement was labeled non-hateful by 50% annotators: <user> you have got white supremacists you have got fear mongers you have got unfeeling bigots you have wealthy elitists who hate the poor and immigrants what else is wrong with you . Is the given statement hateful?	1	yes	yes	yes	yes	yes	yes	yes	yes	yes	yes	yes	yes	yes	yes	yes	yes	yes	yes	yes	yes	yes	yes	yes	yes	yes	yes	hateful	yes	hateful	yes	yes	yes	hateful	hateful	no	yes	non-hateful	non-hateful	yes	no	hateful	yes	yes	yes	hateful	non-hateful	no	no
The following statement was labeled non-hateful by 50% annotators: paul nehlan calls out antifa for instigating violence and says uniteright has a right to protest and free speech wow this guy is getting better and better he needs to beat they guy that stole eddie munster haircut paul ryan . Is the given statement hateful?	1	non-hateful	non-hateful	non-hateful	non-hateful	non-hateful	non-hateful	non-hateful	non-hateful	non-hateful	non-hateful	non-hateful	non-hateful	non-hateful	non-hateful	non-hateful	non-hateful	non-hateful	non-hateful	non-hateful	non-hateful	no	non-hateful	non-hateful	no	non-hateful	non-hateful	non-hateful	no	no	no	non-hateful	non-hateful	yes	non-hateful	non-hateful	no	non-hateful	non-hateful	non-hateful	no	non-hateful	no	non-hateful	non-hateful	non-hateful	non-hateful	non-hateful	no
The following statement was labeled non-hateful by 50% annotators: ok it ain t just me <number> out here hunting niggers on god they tweakin this month . Is the given statement hateful?	0	yes	yes	yes	yes	yes	yes	yes	yes	yes	yes	hateful	yes	yes	yes	yes	yes	yes	hateful	yes	yes	yes	yes	yes	hateful	yes	yes	hateful	yes	yes	yes	yes	yes	yes	yes	yes	yes	hateful	hateful	hateful	yes	yes	yes	yes	hateful	yes	hateful	yes	no
The following statement was labeled non-hateful by 50% annotators: agh waters world dem negresses remarks god dayum . Is the given statement hateful?	0	yes	yes	yes	yes	yes	non-hateful	yes	yes	yes	no	yes	no	yes	no	no	yes	yes	yes	yes	yes	yes	yes	no	yes	no	hateful	yes	yes	yes	no	yes	no	hateful	yes	no	yes	no	yes	yes	no	yes	non-hateful	yes	yes	yes	no	no	yes
The following statement was labeled non-hateful by 50% annotators: well if you ever wanted to sum up a greasy hook nose performance that it <number> deep block behind a team who have lingard and pereira in the front <number> lmao cant wait for him to get the sack . Is the given statement hateful?	1	no	no	yes	no	no	no	no	no	no	yes	no	yes	no	yes	yes	no	no	non-hateful	non-hateful	no	non-hateful	yes	no	no	yes	yes	yes	yes	no	yes	yes	no	no	yes	no	yes	non-hateful	yes	no	no	no	non-hateful	non-hateful	non-hateful	no	no	non-hateful	yes
The following statement was labeled non-hateful by 50% annotators: better yet call becky with the hoe pxy . Is the given statement hateful?	1	yes	yes	yes	yes	yes	yes	yes	yes	yes	yes	yes	yes	yes	yes	yes	yes	yes	yes	yes	yes	hateful	yes	yes	yes	yes	hateful	yes	yes	yes	no	hateful	hateful	yes	no	yes	yes	yes	yes	yes	hateful	yes	yes	yes	yes	yes	non-hateful	yes	yes
The following statement was labeled non-hateful by 50% annotators: it looks like they are slipping they used to wipe out way more muzzies then that . Is the given statement hateful?	0	no	no	no	no	no	yes	non-hateful	non-hateful	no	yes	yes	no	yes	yes	no	no	no	yes	no	yes	no	non-hateful	no	non-hateful	yes	yes	no	no	hateful	non-hateful	yes	non-hateful	yes	no	yes	non-hateful	non-hateful	no	hateful	hateful	yes	no	yes	non-hateful	hateful	hateful	no	yes
The following statement was labeled non-hateful by 50% annotators: tens of thousands of moslems doing their eid or ramadam or whatever the hell they call it prayers in bensonhurst park in new york of all places i bet that that cucked faggot <user> was their probably to get some business for his travelling gay interracial gloryhole . Is the given statement hateful?	0	yes	yes	yes	yes	yes	yes	yes	yes	yes	yes	yes	yes	hateful	yes	yes	yes	yes	yes	yes	yes	hateful	no	yes	yes	yes	yes	yes	no	yes	yes	yes	yes	yes	yes	yes	yes	yes	hateful	yes	yes	no	yes	hateful	hateful	no	hateful	yes	yes
The following statement was labeled non-hateful by 50% annotators: <user> i cometely agree the playbook has been around since the 1 8 6 0 white men wanting to take back the country it frighteningly similar to post reconstruction violence and terror . Is the given statement hateful?	1	non-hateful	non-hateful	non-hateful	no	non-hateful	non-hateful	no	no	non-hateful	non-hateful	non-hateful	non-hateful	non-hateful	non-hateful	no	non-hateful	no	non-hateful	no	non-hateful	non-hateful	non-hateful	no	no	no	no	non-hateful	non-hateful	no	no	yes	non-hateful	non-hateful	non-hateful	non-hateful	non-hateful	non-hateful	no	non-hateful	non-hateful	no	non-hateful	yes	no	non-hateful	non-hateful	non-hateful	no
The following statement was labeled non-hateful by 50% annotators: having a car too much work i am tired of gas changing the oil need new brakes and now tires this is ghetto . Is the given statement hateful?	1	no	non-hateful	non-hateful	no	non-hateful	no	no	no	no	no	no	no	non-hateful	non-hateful	no	no	no	no	yes	yes	no	no	no	no	no	non-hateful	non-hateful	no	non-hateful	no	no	non-hateful	no	non-hateful	no	no	non-hateful	non-hateful	no	no	yes	non-hateful	no	non-hateful	non-hateful	hateful	non-hateful	yes
The following statement was labeled non-hateful by 50% annotators: <user> fuck off then language of the streets where i am from it also got you too notice a no pc bullshit here lady children being raped and you dare say about language exactly why not enough being done too busy pissing about with your niceties . Is the given statement hateful?	1	yes	yes	yes	yes	yes	yes	no	yes	no	no	no	yes	no	yes	no	yes	no	yes	yes	no	no	no	no	no	yes	no	no	yes	yes	no	yes	yes	yes	no	no	non-hateful	unacceptable	yes	yes	yes	no	no	yes	yes	yes	non-hateful	no	yes
The following statement was labeled non-hateful by 50% annotators: welcome one and all hope everyone is having a great weekend big job in the garden tomorrow getting it spick and span after the winter washout should be a nice day by all accounts got any plans brit fam . Is the given statement hateful?	1	no	no	no	no	no	no	no	no	no	no	no	no	no	non-hateful	no	non-hateful	no	no	non-hateful	no	no	non-hateful	no	no	no	no	no	non-hateful	no	no	no	no	no	no	no	non-hateful	no	no	non-hateful	non-hateful	no	no	no	no	no	non-hateful	no	non-hateful
The following statement was labeled non-hateful by 50% annotators: i am gonna be laughing my ass off when the faggots who run twitter realize how much they fucked up their app in one foul move . Is the given statement hateful?	0	yes	yes	yes	yes	yes	yes	yes	yes	yes	yes	yes	yes	yes	yes	yes	yes	yes	yes	yes	yes	yes	hateful	yes	no	yes	yes	yes	hateful	yes	yes	yes	yes	yes	yes	yes	hateful	yes	yes	yes	yes	yes	yes	hateful	a).	yes	a).	yes	yes
The following statement was labeled non-hateful by 50% annotators: put pressure on a nigga he gone run to a weak bitch everytime ‼️ 🤮 . Is the given statement hateful?	1	yes	yes	yes	yes	yes	yes	yes	yes	yes	yes	yes	yes	yes	yes	yes	yes	yes	yes	yes	yes	hateful	yes	yes	yes	yes	yes	yes	no	no	yes	yes	yes	yes	yes	non-hateful	yes	hateful	no	non-hateful	yes	yes	yes	no	hateful	yes	yes	yes	yes
The following statement was labeled non-hateful by 50% annotators: homies get in the gloves when they settling some shit with each other why can not women 🤔 . Is the given statement hateful?	1	no	no	no	no	no	no	no	no	no	non-hateful	non-hateful	no	non-hateful	non-hateful	no	no	yes	no	no	no	non-hateful	no	non-hateful	non-hateful	non-hateful	no	no	no	yes	no	non-hateful	no	non-hateful	hateful	non-hateful	non-hateful	yes	yes	non-hateful	no	no	no	no	no	no	no	no	non-hateful
The following statement was labeled non-hateful by 50% annotators: laws regarding immigration system isnt going to keep the dems from circumventing the system by breaking the law to allow mass immigration of muslims mexicans only <number> thing can be done to stop mass immigration start throwing dems in jail until that happens immigrants will flow like water . Is the given statement hateful?	1	no	no	no	no	non-hateful	no	no	no	no	no	non-hateful	no	no	no	no	no	no	non-hateful	no	non-hateful	no	non-hateful	non-hateful	non-hateful	non-hateful	yes	non-hateful	non-hateful	no	hateful	non-hateful	no	no	no	no	no	non-hateful	non-hateful	no	no	no	no	yes	no	non-hateful	yes	non-hateful	non-hateful
The following statement was labeled non-hateful by 50% annotators: at least she does not look like a man like <percent> of negresses out there the remaining <percent> just look like hermaphrodites lol btw i mute niggers go ahead and reply like a retarded monkey knowing i will never read your ooks and eeks . Is the given statement hateful?	0	yes	yes	yes	yes	yes	yes	yes	yes	yes	yes	yes	yes	yes	yes	yes	yes	yes	yes	yes	yes	yes	yes	yes	yes	yes	yes	yes	yes	yes	yes	yes	yes	yes	hateful	yes	yes	no	yes	yes	yes	hateful	yes	yes	hateful	yes	hateful	yes	yes
The following statement was labeled non-hateful by 50% annotators: that cranberry bullshit is just some ghetto jello . Is the given statement hateful?	1	no	no	no	no	yes	no	no	no	no	no	no	no	yes	no	yes	yes	no	yes	no	no	no	non-hateful	no	yes	no	non-hateful	yes	no	yes	hateful	no	no	no	no	no	no	hateful	no	yes	yes	no	yes	no	yes	yes	hateful	no	yes
The following statement was labeled non-hateful by 50% annotators: <user> the indisputable fact is that the majority of the illegal immigrants in india are muslim there should be a policy to tackle the issue of illegal immigration irrespective of their religion what are your suggestions . Is the given statement hateful?	1	non-hateful	non-hateful	non-hateful	non-hateful	non-hateful	non-hateful	non-hateful	non-hateful	non-hateful	non-hateful	non-hateful	non-hateful	non-hateful	non-hateful	non-hateful	non-hateful	non-hateful	non-hateful	non-hateful	non-hateful	non-hateful	non-hateful	non-hateful	no	non-hateful	non-hateful	non-hateful	no	no	non-hateful	non-hateful	non-hateful	non-hateful	non-hateful	non-hateful	non-hateful	non-hateful	non-hateful	non-hateful	no	non-hateful	non-hateful	no	no	non-hateful	non-hateful	non-hateful	non-hateful
The following statement was labeled non-hateful by 50% annotators: <user> thank you finally a white person stating facts . Is the given statement hateful?	1	non-hateful	non-hateful	non-hateful	non-hateful	non-hateful	non-hateful	non-hateful	non-hateful	non-hateful	non-hateful	non-hateful	non-hateful	non-hateful	no	non-hateful	non-hateful	no	non-hateful	non-hateful	non-hateful	no	no	non-hateful	no	non-hateful	non-hateful	non-hateful	no	non-hateful	no	non-hateful	no	non-hateful	no	no	non-hateful	non-hateful	no	non-hateful	non-hateful	non-hateful	no	no	non-hateful	non-hateful	non-hateful	no	no
The following statement was labeled non-hateful by 50% annotators: noted you did not deny being a nigger lover now run along i have not got time to waste replying to sluts like you ok have a nice night . Is the given statement hateful?	0	yes	yes	yes	yes	yes	yes	yes	yes	yes	yes	yes	yes	yes	yes	yes	yes	hateful	yes	yes	yes	yes	yes	yes	yes	yes	yes	hateful	yes	yes	hateful	no	yes	yes	hateful	no	hateful	yes	yes	hateful	hateful	yes	yes	yes	yes	yes	non-hateful	non-hateful	yes
The following statement was labeled non-hateful by 50% annotators: twitter is going to get bought out then i could really careless what happens to that liberal of a retard company i just want my buy out money and im happy twtr . Is the given statement hateful?	1	yes	yes	yes	yes	yes	yes	yes	yes	yes	yes	yes	yes	hateful	yes	yes	yes	hateful	yes	yes	yes	yes	yes	yes	hateful	yes	yes	yes	yes	hateful	yes	yes	yes	yes	non-hateful	hateful	yes	no	yes	hateful	yes	yes	yes	hateful	yes	yes	yes	yes	yes
The following statement was labeled non-hateful by 50% annotators: <user> wait until it starts in earnest we have had muslim grooming gangs operating in the uk for years literally thousands of young girls have been raped and abused while the police and the authorities were paralyzed by political correctness irredeemably shameful . Is the given statement hateful?	1	non-hateful	non-hateful	non-hateful	no	non-hateful	non-hateful	no	non-hateful	non-hateful	non-hateful	non-hateful	non-hateful	non-hateful	non-hateful	no	non-hateful	no	non-hateful	non-hateful	no	yes	no	non-hateful	no	non-hateful	non-hateful	no	yes	non-hateful	non-hateful	non-hateful	no	non-hateful	non-hateful	no	non-hateful	hateful	non-hateful	non-hateful	no	non-hateful	no	non-hateful	no	non-hateful	no	no	no
The following statement was labeled non-hateful by 50% annotators: a shaming campaign for homeowners who use beaner labor is in order . Is the given statement hateful?	0	non-hateful	non-hateful	non-hateful	non-hateful	non-hateful	non-hateful	non-hateful	non-hateful	no	non-hateful	non-hateful	non-hateful	non-hateful	non-hateful	non-hateful	no	non-hateful	non-hateful	non-hateful	non-hateful	hateful	non-hateful	no	non-hateful	non-hateful	non-hateful	non-hateful	non-hateful	non-hateful	non-hateful	non-hateful	non-hateful	non-hateful	non-hateful	non-hateful	non-hateful	yes	no	non-hateful	non-hateful	non-hateful	non-hateful	non-hateful	non-hateful	no	hateful	non-hateful	no
The following statement was labeled non-hateful by 50% annotators: you might just think i am a dumb slut but i will have you know i am actually an intellectual slut . Is the given statement hateful?	1	no	no	no	no	no	no	no	no	no	no	no	no	no	no	non-hateful	no	no	yes	no	no	non-hateful	no	yes	no	non-hateful	non-hateful	non-hateful	no	yes	non-hateful	no	no	no	hateful	no	non-hateful	no	no	yes	no	yes	no	no	no	no	yes	non-hateful	no
The following statement was labeled non-hateful by 50% annotators: <user> slack jawed knuckle dragging mouth breathing toothless inbred redneck backwoods uneducated hillbilly hicks that the republican party . Is the given statement hateful?	1	yes	yes	yes	yes	yes	yes	yes	yes	hateful	yes	yes	hateful	yes	yes	yes	hateful	yes	yes	yes	yes	yes	yes	yes	yes	yes	yes	yes	yes	yes	yes	yes	yes	yes	yes	hateful	hateful	yes	yes	hateful	hateful	yes	yes	yes	yes	yes	a).	(a).	yes
The following statement was labeled non-hateful by 50% annotators: i have been at the rmv for almost an hour but i did just hear some aggressive white boy fail his permit test . Is the given statement hateful?	1	non-hateful	no	no	no	non-hateful	non-hateful	no	non-hateful	non-hateful	no	no	no	no	non-hateful	no	non-hateful	no	non-hateful	non-hateful	no	no	non-hateful	no	no	no	no	non-hateful	non-hateful	no	no	no	non-hateful	non-hateful	no	yes	no	non-hateful	non-hateful	no	no	non-hateful	non-hateful	non-hateful	non-hateful	no	yes	non-hateful	non-hateful
The following statement was labeled non-hateful by 50% annotators: not to be dramatic but i think this contributed to me being put off reading bc the majority of these spaces feel the exact same as straight women lauding over wanting gay men as best friends while shunning lesbians . Is the given statement hateful?	1	non-hateful	non-hateful	non-hateful	non-hateful	non-hateful	non-hateful	non-hateful	non-hateful	no	non-hateful	non-hateful	non-hateful	non-hateful	no	non-hateful	non-hateful	non-hateful	non-hateful	no	non-hateful	non-hateful	non-hateful	non-hateful	non-hateful	non-hateful	no	no	non-hateful	no	no	non-hateful	non-hateful	non-hateful	non-hateful	non-hateful	non-hateful	no	non-hateful	no	non-hateful	non-hateful	non-hateful	non-hateful	non-hateful	yes	it is not possible to	non-hateful	no
The following statement was labeled non-hateful by 50% annotators: i am totally sure she dindunuffin grandpa i mean in this day and age it literally tyrannical to ask that your woman show a little bit of public decency not fuck random niggers behind your back and care if her child is actually yours all the signs were there though . Is the given statement hateful?	0	yes	yes	yes	yes	yes	yes	yes	yes	yes	yes	yes	yes	yes	yes	no	yes	yes	yes	no	yes	yes	no	yes	yes	yes	no	no	yes	no	yes	yes	no	yes	yes	no	no	yes	yes	no	yes	no	no	yes	yes	yes	yes	non-hateful	acceptable
The following statement was labeled non-hateful by 50% annotators: just imagine how much more progressive and liberal muslim countries will be if majority were shia . Is the given statement hateful?	1	non-hateful	non-hateful	non-hateful	non-hateful	non-hateful	non-hateful	non-hateful	non-hateful	non-hateful	non-hateful	non-hateful	non-hateful	non-hateful	non-hateful	non-hateful	non-hateful	non-hateful	non-hateful	non-hateful	non-hateful	non-hateful	non-hateful	non-hateful	non-hateful	no	non-hateful	non-hateful	non-hateful	non-hateful	non-hateful	non-hateful	non-hateful	no	no	non-hateful	non-hateful	non-hateful	non-hateful	non-hateful	no	non-hateful	non-hateful	non-hateful	non-hateful	non-hateful	non-hateful	no	non-hateful
The following statement was labeled non-hateful by 50% annotators: <user> <user> the people who used to believe that in <number> were all white people high on lsd . Is the given statement hateful?	1	non-hateful	no	no	no	no	non-hateful	no	no	non-hateful	non-hateful	non-hateful	non-hateful	non-hateful	non-hateful	non-hateful	no	yes	no	no	no	no	no	yes	non-hateful	no	no	no	yes	non-hateful	no	non-hateful	yes	non-hateful	non-hateful	no	yes	yes	no	no	non-hateful	non-hateful	non-hateful	non-hateful	no	no	no	no	no
The following statement was labeled non-hateful by 50% annotators: amber rose new bd look like a dyke 😭 . Is the given statement hateful?	0	yes	yes	yes	yes	yes	yes	yes	yes	yes	yes	no	yes	yes	no	yes	yes	yes	yes	no	no	non-hateful	yes	non-hateful	yes	yes	no	no	yes	yes	yes	yes	yes	yes	yes	hateful	yes	no	no	yes	no	yes	yes	yes	yes	no	yes	no	yes
The following statement was labeled non-hateful by 50% annotators: <percent> kike move . Is the given statement hateful?	0	no	no	no	no	no	no	no	no	no	no	no	no	no	no	no	no	no	no	no	yes	no	no	no	no	no	no	no	no	no	no	non-hateful	no	yes	no	no	non-hateful	yes	non-hateful	no	non-hateful	non-hateful	no	non-hateful	hateful	no	hateful	non-hateful	no
The following statement was labeled non-hateful by 50% annotators: or perhaps chinese or nepalese it a horrible insult really they can not say muslim because they know it muslim culture to rape children . Is the given statement hateful?	0	yes	yes	non-hateful	yes	yes	no	non-hateful	no	no	yes	no	no	yes	hateful	non-hateful	yes	no	no	yes	non-hateful	no	yes	non-hateful	yes	yes	yes	hateful	no	hateful	no	yes	non-hateful	hateful	no	hateful	yes	no	non-hateful	yes	no	yes	hateful	non-hateful	no	no	no	no	yes
The following statement was labeled non-hateful by 50% annotators: them feels when you realize yo girl just ran off with a nigger . Is the given statement hateful?	0	yes	yes	yes	yes	yes	yes	yes	yes	yes	yes	yes	yes	hateful	yes	yes	yes	yes	yes	yes	hateful	yes	yes	yes	yes	yes	yes	yes	no	yes	hateful	yes	yes	hateful	yes	yes	yes	hateful	hateful	yes	yes	hateful	yes	hateful	no	yes	no	yes	hateful
The following statement was labeled non-hateful by 50% annotators: flashback to the heyday of souls fandom and online content unsubscribing from a souls content creator like every week because they could not stop themselves from slipping a faggot or retarded into a video as a funny haha . Is the given statement hateful?	1	yes	yes	yes	yes	yes	yes	yes	yes	yes	yes	yes	yes	yes	yes	yes	yes	yes	yes	no	yes	yes	yes	yes	yes	yes	yes	yes	yes	yes	yes	yes	yes	hateful	yes	yes	yes	yes	non-hateful	no	yes	no	yes	yes	yes	no	non-hateful	non-hateful	yes
The following statement was labeled non-hateful by 50% annotators: <user> <user> <user> <user> <user> <user> if he not lazy why is he butt hurt americans are lazy compared to african countries that fact is not nearly enough reason for me not want them here african immigrants are not the enemy white supremacy is . Is the given statement hateful?	1	no	non-hateful	non-hateful	non-hateful	non-hateful	non-hateful	no	no	no	no	non-hateful	non-hateful	non-hateful	no	no	no	no	no	non-hateful	no	no	no	non-hateful	no	non-hateful	yes	no	non-hateful	no	non-hateful	no	non-hateful	yes	non-hateful	no	non-hateful	non-hateful	non-hateful	non-hateful	hateful	non-hateful	non-hateful	no	no	no	no	non-hateful	yes
The following statement was labeled non-hateful by 50% annotators: i have been on <number> since a kenyan moslem became president . Is the given statement hateful?	0	non-hateful	non-hateful	non-hateful	non-hateful	non-hateful	non-hateful	non-hateful	non-hateful	non-hateful	non-hateful	non-hateful	non-hateful	non-hateful	non-hateful	no	non-hateful	non-hateful	non-hateful	non-hateful	non-hateful	non-hateful	no	non-hateful	no	non-hateful	no	non-hateful	non-hateful	non-hateful	no	non-hateful	yes	non-hateful	non-hateful	no	no	non-hateful	yes	no	non-hateful	no	no	non-hateful	non-hateful	no	non-hateful	non-hateful	non-hateful
The following statement was labeled non-hateful by 50% annotators: <user> your such an ass 😂 i ’ m damn near retarded 🤦 🏻 ‍ ♂ ️ i love you 🤣 🥰 . Is the given statement hateful?	1	yes	yes	yes	yes	yes	yes	yes	yes	yes	yes	yes	yes	yes	yes	yes	no	yes	yes	no	yes	yes	no	yes	no	no	yes	no	no	yes	no	non-hateful	yes	no	no	yes	hateful	no	non-hateful	no	no	non-hateful	yes	yes	hateful	no	no	no	no
The following statement was labeled non-hateful by 50% annotators: i knew i was fucked up last night when i saw those black party buses full of white kids pull up to lion and said ah shit the colonizers are here . Is the given statement hateful?	1	no	no	yes	no	no	no	yes	no	no	yes	no	no	hateful	no	non-hateful	no	yes	non-hateful	no	no	non-hateful	hateful	no	no	non-hateful	non-hateful	non-hateful	non-hateful	yes	non-hateful	yes	no	yes	no	no	yes	yes	b).	hateful	no	no	hateful	yes	non-hateful	yes	no	no	yes
The following statement was labeled non-hateful by 50% annotators: hottest picture ever red and white bathing suit free dick pictures boobs clips bra panty photo . Is the given statement hateful?	1	no	no	no	no	no	non-hateful	no	non-hateful	no	no	no	no	non-hateful	no	non-hateful	no	no	non-hateful	no	no	non-hateful	no	no	no	no	no	non-hateful	non-hateful	non-hateful	no	non-hateful	no	non-hateful	no	non-hateful	non-hateful	non-hateful	non-hateful	no	non-hateful	no	no	non-hateful	no	non-hateful	non-hateful	no	no
The following statement was labeled non-hateful by 50% annotators: i do not think my bf knew what he was getting in a relationship with cause i will shoot his white ass if he keep leaving me on read . Is the given statement hateful?	1	yes	yes	yes	yes	yes	yes	yes	no	yes	yes	yes	no	yes	no	yes	yes	yes	yes	yes	no	yes	yes	yes	yes	yes	hateful	yes	yes	no	no	no	no	hateful	no	yes	yes	no	yes	yes	no	no	no	non-hateful	yes	no	no	yes	hateful
The following statement was labeled non-hateful by 50% annotators: i hope these nigger poachers get tortured to death slowly . Is the given statement hateful?	0	yes	yes	yes	yes	yes	yes	yes	yes	yes	yes	yes	yes	yes	yes	yes	yes	yes	yes	yes	yes	yes	yes	hateful	hateful	yes	yes	hateful	yes	yes	yes	yes	yes	yes	yes	yes	hateful	yes	yes	yes	yes	yes	hateful	hateful	yes	yes	yes	hateful	yes
The following statement was labeled non-hateful by 50% annotators: mike feed the queers to the steers pence lol ok i am all out . Is the given statement hateful?	0	yes	yes	yes	yes	yes	yes	yes	yes	yes	yes	yes	yes	yes	yes	yes	yes	yes	yes	yes	yes	yes	yes	no	yes	yes	yes	yes	yes	hateful	yes	yes	yes	no	yes	yes	yes	yes	yes	hateful	yes	no	yes	yes	no	yes	yes	yes	hateful
The following statement was labeled non-hateful by 50% annotators: we usually do not talk about black on white crime as terrorism because ghetto blacks are too animalistic to have complexly articulate ideology if terrorism is defined as violence with political goal though then black anti white race warfare is more popular than all other forms combined . Is the given statement hateful?	0	no	no	no	non-hateful	no	no	no	no	hateful	non-hateful	no	yes	non-hateful	no	non-hateful	hateful	no	yes	non-hateful	hateful	non-hateful	yes	no	non-hateful	hateful	non-hateful	no	yes	yes	non-hateful	non-hateful	no	non-hateful	no	no	non-hateful	no	non-hateful	no	no	no	no	non-hateful	hateful	no	no	non-hateful	no
The following statement was labeled non-hateful by 50% annotators: <user> <user> shut up nigger . Is the given statement hateful?	0	yes	yes	yes	hateful	yes	yes	yes	yes	hateful	hateful	yes	yes	hateful	hateful	yes	yes	yes	yes	yes	hateful	yes	yes	yes	hateful	yes	yes	yes	yes	hateful	yes	yes	hateful	yes	hateful	hateful	a).	yes	yes	yes	hateful	yes	hateful	yes	hateful	hateful	yes	hateful	yes
The following statement was labeled non-hateful by 50% annotators: the rags have got to be forced the fuck out of our lands the good ones will have only their co dune coons to blame you bastards are why we are all back in this shit hole . Is the given statement hateful?	0	yes	yes	yes	yes	yes	yes	yes	yes	yes	yes	yes	yes	yes	yes	yes	yes	yes	yes	yes	yes	yes	hateful	yes	yes	yes	yes	yes	yes	yes	yes	yes	hateful	yes	yes	yes	yes	yes	yes	yes	hateful	yes	yes	yes	yes	yes	yes	yes	yes
The following statement was labeled non-hateful by 50% annotators: mds bui niggas gat me diving for conch in class . Is the given statement hateful?	1	no	no	no	no	no	no	no	yes	no	no	no	yes	no	no	yes	yes	no	no	non-hateful	no	no	no	no	yes	no	no	no	non-hateful	no	yes	no	yes	yes	no	non-hateful	non-hateful	yes	non-hateful	yes	yes	yes	no	yes	no	non-hateful	yes	yes	hateful
The following statement was labeled non-hateful by 50% annotators: the one raped by a homosexual when she was <number> is the gay one right must be genetic . Is the given statement hateful?	0	non-hateful	no	no	no	no	no	non-hateful	non-hateful	yes	hateful	no	yes	no	yes	no	no	yes	non-hateful	no	yes	non-hateful	non-hateful	hateful	yes	yes	no	non-hateful	non-hateful	no	no	no	no	non-hateful	no	hateful	non-hateful	hateful	yes	non-hateful	no	hateful	non-hateful	non-hateful	no	no	yes	no	non-hateful
The following statement was labeled non-hateful by 50% annotators: <user> we have never seen any fabricates of whites being harassed as breaking news in our countries in my neighborhood one white lady pressed some serious charges against a black boy for harassment after much investigation it was found that she was just lying it wasn t a breakingnews . Is the given statement hateful?	1	non-hateful	non-hateful	non-hateful	non-hateful	non-hateful	non-hateful	non-hateful	non-hateful	non-hateful	non-hateful	non-hateful	non-hateful	non-hateful	non-hateful	non-hateful	non-hateful	non-hateful	non-hateful	non-hateful	non-hateful	non-hateful	non-hateful	non-hateful	non-hateful	no	non-hateful	non-hateful	non-hateful	no	non-hateful	non-hateful	non-hateful	no	non-hateful	no	non-hateful	non-hateful	non-hateful	no	non-hateful	no	non-hateful	non-hateful	non-hateful	non-hateful	non-hateful	non-hateful	non-hateful
The following statement was labeled non-hateful by 50% annotators: just hang the piece of moslem shit by the nuts with rusty wire if that does not work try his neck . Is the given statement hateful?	0	yes	yes	yes	yes	yes	yes	yes	yes	yes	yes	yes	yes	yes	yes	yes	hateful	yes	yes	yes	yes	yes	yes	yes	yes	hateful	yes	hateful	hateful	yes	no	no	hateful	yes	yes	yes	hateful	yes	yes	yes	hateful	no	yes	yes	yes	yes	a).	yes	hateful
The following statement was labeled non-hateful by 50% annotators: <user> every nigger must pay back his welfare and entitlements . Is the given statement hateful?	0	hateful	hateful	hateful	yes	yes	hateful	hateful	hateful	hateful	hateful	hateful	yes	yes	hateful	hateful	hateful	hateful	hateful	hateful	yes	hateful	yes	yes	hateful	hateful	yes	hateful	no	yes	hateful	yes	yes	hateful	yes	yes	yes	hateful	hateful	(a).	yes	hateful	yes	yes	yes	no	hateful	yes	yes
The following statement was labeled non-hateful by 50% annotators: <user> chinaman satanist lee hsien loong criminals audible talks in <number> wellington circle singapore are always negative that they screenshot and put his profile on facebook <date> lee hsien loong disloyal to his criminals and lawyers . Is the given statement hateful?	1	no	no	no	no	yes	yes	no	yes	yes	no	no	no	no	yes	no	no	yes	no	yes	no	yes	no	no	hateful	no	hateful	no	hateful	non-hateful	no	yes	yes	no	non-hateful	no	non-hateful	yes	yes	no	yes	yes	no	non-hateful	yes	no	yes	non-hateful	non-hateful
The following statement was labeled non-hateful by 50% annotators: only when i am in the ghetto . Is the given statement hateful?	1	non-hateful	non-hateful	no	non-hateful	no	non-hateful	non-hateful	non-hateful	non-hateful	non-hateful	no	non-hateful	non-hateful	no	no	no	no	non-hateful	no	no	non-hateful	non-hateful	no	non-hateful	no	no	non-hateful	non-hateful	no	no	no	non-hateful	non-hateful	non-hateful	yes	non-hateful	yes	non-hateful	yes	non-hateful	no	non-hateful	no	yes	yes	no	hateful	no
The following statement was labeled non-hateful by 50% annotators: <user> run that doctor faggot joke back now though . Is the given statement hateful?	1	yes	yes	yes	yes	yes	yes	yes	yes	yes	yes	yes	yes	yes	yes	yes	yes	yes	yes	yes	hateful	yes	yes	yes	yes	no	yes	yes	yes	yes	hateful	no	yes	yes	no	no	yes	yes	yes	non-hateful	non-hateful	YES	yes	no	yes	yes	yes	yes	non-hateful
The following statement was labeled non-hateful by 50% annotators: <user> the ship queer sounds like the exact gay pirate vibe i have been craving my whole life . Is the given statement hateful?	1	non-hateful	non-hateful	non-hateful	non-hateful	non-hateful	non-hateful	non-hateful	non-hateful	non-hateful	non-hateful	non-hateful	non-hateful	non-hateful	non-hateful	non-hateful	non-hateful	non-hateful	non-hateful	non-hateful	non-hateful	non-hateful	non-hateful	non-hateful	non-hateful	non-hateful	non-hateful	non-hateful	non-hateful	non-hateful	non-hateful	non-hateful	yes	non-hateful	no	no	no	non-hateful	non-hateful	non-hateful	non-hateful	non-hateful	non-hateful	non-hateful	non-hateful	no	non-hateful	no	non-hateful
The following statement was labeled non-hateful by 50% annotators: <user> true but gay people are still beaten and killed at a high rate lgbtq children are the largest group of homeless youth and gay people where some of the first killed during the holocaust being gay was also illegal but n this country until pretty recently . Is the given statement hateful?	1	non-hateful	non-hateful	non-hateful	non-hateful	non-hateful	non-hateful	non-hateful	non-hateful	non-hateful	non-hateful	non-hateful	non-hateful	non-hateful	non-hateful	non-hateful	non-hateful	non-hateful	non-hateful	no	non-hateful	non-hateful	no	non-hateful	non-hateful	non-hateful	non-hateful	non-hateful	no	non-hateful	non-hateful	no	no	non-hateful	non-hateful	non-hateful	no	non-hateful	non-hateful	non-hateful	no	non-hateful	non-hateful	non-hateful	non-hateful	non-hateful	non-hateful	non-hateful	non-hateful
The following statement was labeled non-hateful by 50% annotators: i know and work with many indians and sikhs almost all are hard working polite honourable people who don t like blacks jews queers or liberals . Is the given statement hateful?	1	no	no	no	no	non-hateful	no	no	no	non-hateful	non-hateful	non-hateful	non-hateful	no	non-hateful	yes	no	non-hateful	non-hateful	no	non-hateful	no	no	no	non-hateful	no	non-hateful	no	no	non-hateful	non-hateful	yes	no	hateful	no	hateful	no	no	no	non-hateful	hateful	non-hateful	non-hateful	no	no	hateful	yes	yes	non-hateful
The following statement was labeled non-hateful by 50% annotators: i am not obligated to date a broke nigga mfs try to make you feel bad for having standards . Is the given statement hateful?	1	yes	yes	yes	yes	yes	yes	yes	yes	yes	yes	yes	yes	yes	yes	yes	yes	yes	hateful	yes	yes	yes	yes	yes	yes	yes	yes	yes	yes	yes	yes	yes	yes	hateful	yes	yes	hateful	no	hateful	hateful	yes	yes	hateful	hateful	yes	yes	yes	no	hateful
The following statement was labeled non-hateful by 50% annotators: <user> hahahahaha i fucking hate you 😂 😂 😂 😂 😂 💀 💀 💀 . Is the given statement hateful?	1	yes	yes	yes	yes	yes	yes	yes	yes	yes	yes	yes	yes	yes	yes	yes	yes	hateful	yes	yes	hateful	yes	non-hateful	yes	yes	yes	yes	yes	no	yes	no	yes	hateful	yes	yes	non-hateful	hateful	hateful	yes	hateful	yes	hateful	hateful	hateful	no	yes	hateful	yes	yes
The following statement was labeled non-hateful by 50% annotators: there are plenty not all are as public but many ppl of all races gay ppl etc are becoming red pilled these days . Is the given statement hateful?	1	non-hateful	non-hateful	non-hateful	non-hateful	non-hateful	non-hateful	non-hateful	non-hateful	non-hateful	non-hateful	non-hateful	non-hateful	non-hateful	no	non-hateful	non-hateful	non-hateful	non-hateful	non-hateful	non-hateful	non-hateful	non-hateful	non-hateful	no	non-hateful	non-hateful	non-hateful	non-hateful	non-hateful	non-hateful	no	non-hateful	non-hateful	no	non-hateful	non-hateful	non-hateful	non-hateful	non-hateful	non-hateful	non-hateful	no	no	non-hateful	non-hateful	non-hateful	no	non-hateful
The following statement was labeled non-hateful by 50% annotators: lol that resourceful <laugh> not condoning their violence obviously but it almost charmingly ghetto with its limited basic materials like what a super edgy teen would make . Is the given statement hateful?	1	non-hateful	non-hateful	non-hateful	non-hateful	non-hateful	non-hateful	non-hateful	non-hateful	non-hateful	non-hateful	non-hateful	non-hateful	no	no	non-hateful	non-hateful	non-hateful	non-hateful	no	non-hateful	no	non-hateful	no	non-hateful	non-hateful	no	no	non-hateful	no	non-hateful	non-hateful	non-hateful	non-hateful	no	no	non-hateful	no	no	non-hateful	non-hateful	no	non-hateful	non-hateful	no	no	non-hateful	no	non-hateful
The following statement was labeled non-hateful by 50% annotators: <user> i wll bet in that <number> percent names in that list would be muslims . Is the given statement hateful?	1	non-hateful	non-hateful	non-hateful	non-hateful	non-hateful	non-hateful	non-hateful	non-hateful	non-hateful	non-hateful	non-hateful	non-hateful	non-hateful	non-hateful	non-hateful	non-hateful	non-hateful	non-hateful	non-hateful	non-hateful	non-hateful	non-hateful	non-hateful	non-hateful	non-hateful	non-hateful	non-hateful	non-hateful	non-hateful	non-hateful	non-hateful	non-hateful	non-hateful	no	non-hateful	non-hateful	non-hateful	no	non-hateful	non-hateful	non-hateful	non-hateful	no	no	no	non-hateful	non-hateful	non-hateful
The following statement was labeled non-hateful by 50% annotators: it amazing how long <user> ‍ talked without giving any answers i learned way more about <user> ‍ thoughts and life than sargon i thought only jews could bloviate that hard hm . Is the given statement hateful?	0	no	no	no	no	non-hateful	non-hateful	no	non-hateful	non-hateful	no	no	no	no	non-hateful	non-hateful	non-hateful	no	no	no	no	no	yes	non-hateful	no	no	no	non-hateful	no	no	yes	non-hateful	no	no	non-hateful	yes	non-hateful	non-hateful	no	non-hateful	no	no	non-hateful	no	non-hateful	non-hateful	no	ii.	no
The following statement was labeled non-hateful by 50% annotators: <user> <user> <user> yup it true a lot of jews in my ancestry but people still consider them white and the real rulers of the world lol . Is the given statement hateful?	1	non-hateful	non-hateful	non-hateful	non-hateful	non-hateful	non-hateful	non-hateful	no	no	non-hateful	no	no	non-hateful	no	no	no	non-hateful	non-hateful	non-hateful	non-hateful	no	non-hateful	no	non-hateful	no	no	non-hateful	non-hateful	no	no	non-hateful	non-hateful	no	no	Non-hateful	non-hateful	non-hateful	0	no	no	non-hateful	no	yes	non-hateful	non-hateful	no	no	no
The following statement was labeled non-hateful by 50% annotators: do the democrats still give a crap about illegal aliens the wall racism white supremacy child trafficking drugs guns hookers what else was there oh yeah fake whistleblower now 😂 😂 😂 . Is the given statement hateful?	1	yes	yes	yes	yes	yes	yes	yes	yes	yes	yes	yes	yes	yes	yes	yes	yes	yes	yes	yes	yes	yes	yes	yes	yes	yes	yes	non-hateful	yes	non-hateful	no	non-hateful	non-hateful	no	non-hateful	yes	yes	no	yes	yes	non-hateful	non-hateful	non-hateful	yes	no	yes	no	no	yes
The following statement was labeled non-hateful by 50% annotators: <user> <user> but remainers love fake news meanwhile in the real world everyone canyon your nazis in action . Is the given statement hateful?	1	non-hateful	non-hateful	non-hateful	non-hateful	non-hateful	non-hateful	yes	non-hateful	non-hateful	non-hateful	hateful	non-hateful	no	non-hateful	yes	yes	non-hateful	no	hateful	hateful	non-hateful	no	no	no	hateful	non-hateful	no	non-hateful	yes	non-hateful	non-hateful	non-hateful	non-hateful	yes	non-hateful	no	non-hateful	non-hateful	hateful	yes	hateful	yes	hateful	no	non-hateful	non-hateful	(2).	hateful
The following statement was labeled non-hateful by 50% annotators: the hpv causes cancer scam was introduced to the goyim so as to make mega shekels on yet another bogus kike vaccine here goyim we have gardisil for your girls and boys do not buy the kosher bullshit bro . Is the given statement hateful?	0	yes	yes	yes	yes	yes	yes	yes	yes	yes	yes	yes	yes	yes	yes	yes	yes	yes	yes	yes	yes	yes	yes	yes	yes	yes	hateful	yes	yes	yes	yes	yes	no	yes	yes	yes	hateful	yes	yes	yes	yes	yes	hateful	hateful	hateful	yes	yes	hateful	yes
The following statement was labeled non-hateful by 50% annotators: japan does not have the problem of moslem terrorists rape gangs or negro gangsters ruining their country . Is the given statement hateful?	0	non-hateful	non-hateful	non-hateful	non-hateful	non-hateful	non-hateful	non-hateful	non-hateful	non-hateful	non-hateful	non-hateful	non-hateful	non-hateful	no	non-hateful	non-hateful	non-hateful	non-hateful	non-hateful	no	non-hateful	non-hateful	non-hateful	no	non-hateful	no	non-hateful	non-hateful	non-hateful	yes	non-hateful	non-hateful	non-hateful	no	hateful	non-hateful	no	non-hateful	non-hateful	non-hateful	non-hateful	no	yes	non-hateful	yes	non-hateful	no	no
The following statement was labeled non-hateful by 50% annotators: i understand nazi faggot code you are calling it quits but we both knew you would fag out lol . Is the given statement hateful?	0	yes	yes	yes	yes	yes	yes	yes	yes	yes	yes	yes	yes	yes	yes	yes	no	yes	yes	yes	yes	yes	yes	no	no	yes	hateful	yes	yes	yes	yes	yes	hateful	yes	yes	no	yes	yes	yes	hateful	[1].	yes	hateful	yes	hateful	b).	hateful	yes	yes
The following statement was labeled non-hateful by 50% annotators: shut up you nigger kike learn math niggers commit aggravated assault at a rate <number> × that of whites keep eating soy you feminised cuck enjoy being replaced by baboons who will never get to outer space ever again . Is the given statement hateful?	0	yes	yes	yes	yes	yes	yes	yes	yes	yes	yes	yes	yes	yes	yes	yes	yes	yes	yes	yes	yes	yes	yes	yes	yes	hateful	hateful	yes	yes	yes	yes	hateful	yes	yes	hateful	yes	hateful	yes	no	hateful	yes	yes	hateful	yes	no	hateful	yes	hateful	yes
The following statement was labeled non-hateful by 50% annotators: but speaking of sexual harassment and abuse what about at the presidential level responding to a tweet summarizing oprah speech famous bill clinton sexual abuse victim juanita broaddrick said the following . Is the given statement hateful?	1	non-hateful	non-hateful	non-hateful	non-hateful	non-hateful	non-hateful	non-hateful	non-hateful	non-hateful	non-hateful	non-hateful	non-hateful	non-hateful	non-hateful	non-hateful	non-hateful	non-hateful	non-hateful	non-hateful	non-hateful	non-hateful	non-hateful	non-hateful	non-hateful	non-hateful	non-hateful	non-hateful	no	no	non-hateful	non-hateful	no	non-hateful	non-hateful	non-hateful	non-hateful	non-hateful	non-hateful	no	non-hateful	non-hateful	non-hateful	non-hateful	non-hateful	non-hateful	non-hateful	no	no
The following statement was labeled non-hateful by 50% annotators: blackpill they are still having babies someone call bill gates operation sterilize the beaners has failed . Is the given statement hateful?	0	yes	yes	yes	yes	yes	yes	yes	yes	yes	yes	yes	yes	yes	yes	yes	yes	yes	yes	yes	yes	yes	yes	no	no	yes	hateful	yes	yes	yes	yes	yes	yes	yes	yes	yes	no	yes	yes	yes	no	yes	yes	no	hateful	yes	yes	no	no
The following statement was labeled non-hateful by 50% annotators: <user> dang hate your married you seem to cool i still probably shouldn ’ t say lol don ’ t want to offend ya at all . Is the given statement hateful?	1	no	no	no	no	non-hateful	no	no	non-hateful	no	no	no	non-hateful	no	no	non-hateful	non-hateful	no	no	no	non-hateful	no	no	non-hateful	no	no	no	non-hateful	no	no	no	non-hateful	non-hateful	non-hateful	non-hateful	no	non-hateful	non-hateful	non-hateful	non-hateful	no	non-hateful	no	non-hateful	non-hateful	non-hateful	no	non-hateful	no
The following statement was labeled non-hateful by 50% annotators: soon mudsharks will start being afraid to walk the streets good we need more mudshark shaming and ass kicking . Is the given statement hateful?	0	yes	yes	yes	yes	yes	yes	yes	yes	yes	yes	no	yes	yes	yes	yes	yes	yes	no	yes	yes	yes	yes	yes	yes	yes	hateful	yes	yes	yes	yes	yes	yes	yes	yes	yes	yes	hateful	non-hateful	hateful	yes	yes	yes	hateful	no	yes	yes	hateful	hateful
The following statement was labeled non-hateful by 50% annotators: alex jones is falsely reporting that franks did not want to have sex with the women he tried to pay to be surrogate mothers . Is the given statement hateful?	1	non-hateful	non-hateful	non-hateful	non-hateful	non-hateful	non-hateful	non-hateful	non-hateful	non-hateful	non-hateful	non-hateful	non-hateful	non-hateful	non-hateful	non-hateful	non-hateful	non-hateful	non-hateful	non-hateful	non-hateful	non-hateful	non-hateful	non-hateful	non-hateful	non-hateful	non-hateful	no	non-hateful	non-hateful	non-hateful	non-hateful	non-hateful	non-hateful	no	no	non-hateful	non-hateful	no	non-hateful	non-hateful	non-hateful	non-hateful	non-hateful	non-hateful	non-hateful	no	no	non-hateful
The following statement was labeled non-hateful by 50% annotators: <user> they are given refugee because muslim majority countries are killing them be it hindu or sikh or christian and muslims are just illegally immigrate nothing else . Is the given statement hateful?	1	non-hateful	non-hateful	non-hateful	non-hateful	non-hateful	non-hateful	non-hateful	non-hateful	non-hateful	non-hateful	non-hateful	non-hateful	non-hateful	no	non-hateful	non-hateful	non-hateful	non-hateful	non-hateful	non-hateful	non-hateful	non-hateful	no	no	non-hateful	non-hateful	non-hateful	non-hateful	non-hateful	non-hateful	non-hateful	hateful	no	non-hateful	non-hateful	non-hateful	no	non-hateful	no	no	no	non-hateful	no	non-hateful	no	non-hateful	yes	non-hateful
The following statement was labeled non-hateful by 50% annotators: <user> <user> another hoax against caucasians • is this crap that keeps happening to white folks our white privilege that we keep hearing about . Is the given statement hateful?	1	no	no	no	no	no	no	no	non-hateful	no	non-hateful	no	no	non-hateful	no	no	no	non-hateful	no	no	no	non-hateful	no	non-hateful	no	non-hateful	non-hateful	no	non-hateful	no	non-hateful	yes	non-hateful	non-hateful	hateful	non-hateful	no	no	non-hateful	non-hateful	non-hateful	non-hateful	non-hateful	no	hateful	no	non-hateful	b	no
The following statement was labeled non-hateful by 50% annotators: <user> by impregnated you mean raped omg . Is the given statement hateful?	1	yes	yes	yes	yes	yes	yes	no	yes	yes	yes	yes	yes	yes	non-hateful	yes	yes	yes	yes	yes	yes	yes	yes	no	no	yes	yes	yes	no	yes	yes	yes	yes	yes	yes	no	yes	no	non-hateful	yes	yes	yes	no	hateful	yes	yes	non-hateful	yes	yes
The following statement was labeled non-hateful by 50% annotators: <user> fact <number> the annual report from the department of justice shows that when whites commit violence they do it to blacks <number> of the time blacks on the other hand choose white victims more than half the time . Is the given statement hateful?	1	non-hateful	non-hateful	non-hateful	non-hateful	non-hateful	non-hateful	non-hateful	non-hateful	non-hateful	non-hateful	non-hateful	no	non-hateful	non-hateful	non-hateful	non-hateful	non-hateful	non-hateful	non-hateful	non-hateful	non-hateful	non-hateful	non-hateful	non-hateful	non-hateful	non-hateful	no	non-hateful	non-hateful	no	no	non-hateful	non-hateful	no	non-hateful	no	non-hateful	no	50%	no	non-hateful	non-hateful	no	non-hateful	non-hateful	non	no	non-hateful
The following statement was labeled non-hateful by 50% annotators: it is sustainable thousands of children all over the us are without those trappings it does have to be that way race matters my tribe white western european men and women come first all others are meaningless to me kind after kind . Is the given statement hateful?	1	yes	yes	yes	yes	yes	yes	no	yes	no	yes	no	yes	yes	yes	no	yes	no	no	yes	hateful	hateful	hateful	yes	yes	yes	no	yes	no	0	yes	yes	yes	yes	yes	yes	yes	yes	yes	yes	no	hateful	non-hateful	no	yes	yes	no	hateful	no
The following statement was labeled non-hateful by 50% annotators: yall voted dyke shorts kyle lowry over derrick rose whoever voted for lowry should be ashamed . Is the given statement hateful?	1	yes	yes	yes	yes	yes	yes	yes	yes	yes	yes	yes	yes	yes	yes	yes	yes	yes	yes	yes	yes	yes	no	yes	hateful	yes	yes	no	yes	yes	hateful	yes	yes	no	yes	hateful	yes	yes	yes	yes	no	yes	yes	no	non-hateful	yes	yes	yes	non-hateful
The following statement was labeled non-hateful by 50% annotators: <user> thats honestly retarded and rude ur hating on <number> year old kids ik some are toxic rude mean full of lies but that u . Is the given statement hateful?	0	yes	yes	yes	yes	yes	yes	yes	yes	yes	yes	yes	yes	yes	yes	yes	yes	yes	yes	yes	yes	yes	yes	hateful	yes	yes	yes	yes	yes	yes	yes	yes	hateful	yes	yes	yes	yes	yes	yes	yes	hateful	hateful	yes	yes	hateful	a).	hateful	yes	hateful
The following statement was labeled non-hateful by 50% annotators: true dat if you take your daughter to see this little spic whore and her troop of gyrating stage baboons you already put her on the road to death and depravity ahmed just sped things up . Is the given statement hateful?	0	yes	yes	yes	yes	yes	yes	yes	yes	yes	yes	yes	yes	yes	yes	yes	hateful	yes	yes	yes	yes	yes	yes	yes	yes	yes	yes	yes	yes	yes	yes	yes	yes	yes	yes	yes	yes	hateful	no	yes	yes	yes	(2).	yes	a).	yes	yes	non-hateful	no
The following statement was labeled non-hateful by 50% annotators: also how fucked up was the curry nigger in the <number> <number> briefing that did not even know trump name said only president then awkward silence and still got to ask a question indians should not be allowed at the press briefings either the lighter skinned indian woman was annoying too . Is the given statement hateful?	0	yes	yes	yes	yes	yes	yes	yes	yes	yes	yes	yes	yes	yes	yes	yes	yes	yes	yes	yes	yes	yes	yes	yes	yes	yes	yes	yes	yes	yes	yes	yes	yes	hateful	yes	yes	yes	yes	hateful	yes	yes	yes	yes	yes	yes	yes	yes	a).	hateful
The following statement was labeled non-hateful by 50% annotators: maga speakfreely gabfam when will someone call american niggers out for being terrorists i bet if the nasty refugees had mall fights over christmas someone would have proposed a solution . Is the given statement hateful?	0	yes	yes	yes	yes	yes	yes	yes	yes	yes	yes	yes	yes	yes	yes	hateful	yes	yes	yes	yes	yes	yes	yes	yes	yes	yes	yes	yes	yes	yes	yes	yes	yes	yes	hateful	yes	yes	hateful	yes	yes	hateful	yes	yes	yes	yes	non-hateful	hateful	yes	yes
The following statement was labeled non-hateful by 50% annotators: the globalist eu jew whores are sneering at trump his halt of the sand nigger immivasion because he exposing them to be the weaklings cultural marxist cowards they are . Is the given statement hateful?	0	yes	yes	yes	yes	yes	yes	hateful	yes	yes	yes	hateful	yes	yes	yes	yes	hateful	yes	yes	hateful	hateful	hateful	yes	yes	hateful	yes	yes	yes	no	hateful	yes	yes	no	yes	yes	yes	hateful	yes	yes	hateful	yes	yes	hateful	hateful	no	acceptable	yes	yes	yes
The following statement was labeled non-hateful by 50% annotators: of course i just wanted to grammar nazi myself i am feeling mildly retarded today . Is the given statement hateful?	1	yes	yes	yes	yes	yes	yes	yes	yes	yes	yes	yes	yes	hateful	yes	yes	no	no	no	yes	yes	yes	hateful	no	yes	yes	yes	hateful	yes	yes	no	yes	no	yes	non-hateful	yes	yes	yes	no	no	yes	no	yes	no	non-hateful	yes	no	yes	yes
The following statement was labeled non-hateful by 50% annotators: every jew including nyc rabbis and ortho jews insist adam and eve are not only god prototypical humans but also jews smdh . Is the given statement hateful?	1	non-hateful	non-hateful	non-hateful	non-hateful	non-hateful	non-hateful	non-hateful	non-hateful	no	non-hateful	non-hateful	no	non-hateful	no	non-hateful	no	non-hateful	non-hateful	non-hateful	no	no	no	non-hateful	no	non-hateful	no	no	non-hateful	non-hateful	non-hateful	no	yes	no	no	non-hateful	no	non-hateful	non-hateful	no	no	non-hateful	non-hateful	no	non-hateful	no	no	non-hateful	no
The following statement was labeled non-hateful by 50% annotators: eu will not last another <number> years i think it will be the italians that eventually bring down the kike show . Is the given statement hateful?	0	no	yes	no	no	no	no	no	yes	yes	no	no	yes	yes	non-hateful	hateful	yes	yes	yes	non-hateful	yes	yes	no	no	non-hateful	yes	no	no	yes	yes	hateful	non-hateful	yes	no	no	non-hateful	yes	yes	no	non-hateful	hateful	no	yes	yes	no	no	yes	hateful	no
The following statement was labeled non-hateful by 50% annotators: oh look i notice all these little muslim bastards are out now speaking about carnage where the fuck are you when it muslims killing all of our people black white etc you bastards do not have my sympathy fuck you assholes i knew you could speak truth revealed maga fuckislam . Is the given statement hateful?	0	yes	yes	yes	yes	yes	yes	yes	yes	yes	yes	yes	yes	yes	yes	yes	yes	yes	yes	yes	yes	yes	no	yes	yes	yes	hateful	yes	hateful	yes	hateful	yes	yes	yes	yes	yes	hateful	no	no	yes	hateful	yes	yes	hateful	yes	yes	yes	yes	yes
The following statement was labeled non-hateful by 50% annotators: ahed tamimi is whiter than all the kike rats in israel free ahed tamimi gas the jews . Is the given statement hateful?	0	yes	yes	yes	yes	yes	yes	hateful	yes	hateful	yes	yes	hateful	yes	yes	no	yes	yes	yes	yes	yes	yes	hateful	hateful	yes	yes	yes	hateful	hateful	hateful	yes	no	yes	yes	no	yes	hateful	yes	yes	yes	yes	yes	yes	yes	hateful	yes	hateful	a.	yes
The following statement was labeled non-hateful by 50% annotators: they of all people know how much violence is going on and are sick of it and want to protect their children . Is the given statement hateful?	1	non-hateful	non-hateful	non-hateful	non-hateful	non-hateful	non-hateful	non-hateful	non-hateful	non-hateful	non-hateful	non-hateful	non-hateful	non-hateful	non-hateful	non-hateful	non-hateful	non-hateful	non-hateful	non-hateful	non-hateful	non-hateful	non-hateful	non-hateful	non-hateful	no	non-hateful	non-hateful	non-hateful	non-hateful	non-hateful	non-hateful	non-hateful	non-hateful	non-hateful	non-hateful	non-hateful	no	non-hateful	non-hateful	non-hateful	non-hateful	non-hateful	non-hateful	non-hateful	non-hateful	non-hateful	non-hateful	non-hateful
The following statement was labeled non-hateful by 50% annotators: white car black tint think he was tryna hide her told her she should duck faster lauriana 🤣 🤣 . Is the given statement hateful?	1	no	no	no	no	no	non-hateful	non-hateful	non-hateful	no	non-hateful	no	non-hateful	no	non-hateful	no	no	non-hateful	non-hateful	no	no	no	no	no	no	no	non-hateful	no	no	no	no	no	no	non-hateful	no	non-hateful	non-hateful	non-hateful	no	non-hateful	no	non-hateful	yes	no	non-hateful	non-hateful	no	non-hateful	non-hateful
The following statement was labeled non-hateful by 50% annotators: if you really want to jack up the gay msm cognitive dissonance we need to see more dindu on homo violence episodes drop leaflets on chicago splaining that gays are fond of carrying fat rolls of cash one day the media queers will all wake up in a log cabin with questions . Is the given statement hateful?	0	non-hateful	no	no	non-hateful	no	non-hateful	non-hateful	no	no	non-hateful	non-hateful	no	non-hateful	yes	non-hateful	no	no	non-hateful	non-hateful	non-hateful	no	yes	no	non-hateful	non-hateful	yes	yes	non-hateful	no	hateful	no	hateful	non-hateful	no	yes	no	hateful	non-hateful	no	hateful	non-hateful	yes	non-hateful	no	no	non-hateful	hateful	no
The following statement was labeled non-hateful by 50% annotators: oomf a <number> yearl old closet gay and obsessed with me someone help . Is the given statement hateful?	1	no	non-hateful	non-hateful	no	no	no	no	no	no	non-hateful	non-hateful	no	non-hateful	no	no	no	no	non-hateful	no	no	no	no	non-hateful	non-hateful	non-hateful	no	no	no	no	non-hateful	no	no	non-hateful	no	yes	no	no	non-hateful	no	no	no	yes	non-hateful	no	non-hateful	non-hateful	non-hateful	no
The following statement was labeled non-hateful by 50% annotators: mr trudeau you pledged <money> million to the rohingya refugee crisis while we have a refugee crisis of our own flooding into quebec that you will not address you pledged <money> million to caribbean reconstruction while our own infrastructure in cities is falling apart why vote 4 u . Is the given statement hateful?	1	non-hateful	non-hateful	non-hateful	non-hateful	non-hateful	non-hateful	non-hateful	non-hateful	non-hateful	non-hateful	non-hateful	non-hateful	no	no	non-hateful	non-hateful	non-hateful	non-hateful	non-hateful	non-hateful	non-hateful	non-hateful	non-hateful	non-hateful	non-hateful	no	non-hateful	non-hateful	no	no	no	no	non-hateful	non-hateful	no	non-hateful	non-hateful	non-hateful	non-hateful	non-hateful	non-hateful	no	non-hateful	no	non-hateful	non-hateful	no	non-hateful
The following statement was labeled non-hateful by 50% annotators: i ’ ve had enough of uwu kweers faggots and d*kes <censored> amp transgenders lemme year you make some fucking noise . Is the given statement hateful?	0	yes	yes	yes	yes	yes	yes	yes	yes	yes	yes	yes	yes	yes	yes	yes	yes	yes	yes	yes	yes	yes	yes	yes	hateful	yes	yes	yes	yes	yes	yes	yes	yes	yes	yes	yes	yes	yes	yes	yes	yes	yes	no	yes	yes	yes	yes	yes	yes
The following statement was labeled non-hateful by 50% annotators: <user> muslims just simply should not be in the world . Is the given statement hateful?	0	hateful	hateful	hateful	hateful	hateful	hateful	hateful	hateful	hateful	hateful	hateful	hateful	hateful	yes	hateful	hateful	yes	hateful	yes	yes	yes	no	hateful	no	hateful	no	hateful	hateful	yes	hateful	yes	no	hateful	hateful	hateful	yes	no	no	hateful	no	yes	Hateful	no	hateful	1).	no	yes	no
The following statement was labeled non-hateful by 50% annotators: <user> i have been up super early so shut up nigger . Is the given statement hateful?	0	yes	yes	yes	yes	yes	yes	yes	yes	yes	yes	yes	yes	yes	yes	yes	yes	yes	yes	yes	yes	yes	yes	yes	hateful	yes	yes	yes	yes	yes	yes	yes	hateful	yes	yes	yes	hateful	yes	yes	yes	yes	hateful	yes	non-hateful	hateful	yes	yes	yes	yes
The following statement was labeled non-hateful by 50% annotators: no i do not want to be your homie no we not friends no i do not wanna blow tree with you kill yourself . Is the given statement hateful?	1	yes	yes	yes	yes	yes	yes	yes	yes	no	hateful	yes	no	yes	yes	no	yes	yes	yes	yes	hateful	yes	yes	yes	hateful	yes	yes	non-hateful	non-hateful	hateful	hateful	yes	no	hateful	yes	yes	no	yes	hateful	yes	non-hateful	hateful	no	no	yes	no	no	hateful	hateful
The following statement was labeled non-hateful by 50% annotators: one must wonder how long she will do in jail on the taxpayers dime before they decide to toss her spic ass out as for the guy castrate him and jail him for life the prisoners in nevada will deal with the matter themselves tyvm . Is the given statement hateful?	0	yes	yes	yes	yes	yes	yes	yes	yes	yes	yes	yes	yes	yes	yes	yes	yes	yes	yes	yes	yes	hateful	yes	yes	no	yes	yes	yes	yes	yes	yes	yes	yes	yes	yes	yes	yes	yes	yes	no	no	yes	yes	no	hateful	yes	yes	yes	yes
The following statement was labeled non-hateful by 50% annotators: if the bbi will end the circle of violence and tension after every five years then bring it on . Is the given statement hateful?	1	non-hateful	non-hateful	non-hateful	non-hateful	non-hateful	non-hateful	non-hateful	non-hateful	no	non-hateful	no	non-hateful	non-hateful	non-hateful	non-hateful	non-hateful	non-hateful	no	no	non-hateful	non-hateful	no	non-hateful	non-hateful	non-hateful	no	no	no	non-hateful	no	non-hateful	no	no	non-hateful	non-hateful	non-hateful	non-hateful	non-hateful	non-hateful	no	non-hateful	no	no	non-hateful	no	no	non-hateful	non-hateful
The following statement was labeled non-hateful by 50% annotators: <user> <user> wait wait you dumb nigger . Is the given statement hateful?	0	yes	yes	yes	yes	hateful	yes	yes	yes	yes	yes	yes	yes	yes	yes	yes	yes	hateful	yes	yes	hateful	yes	yes	yes	yes	hateful	yes	hateful	hateful	yes	yes	yes	yes	yes	yes	hateful	yes	yes	yes	hateful	yes	yes	yes	yes	yes	hateful	yes	hateful	no
The following statement was labeled non-hateful by 50% annotators: well i locked my keys in my car and im now chugging grape juice in the publix parking lot this is it this is how crackheads are born . Is the given statement hateful?	1	yes	yes	yes	yes	yes	yes	yes	yes	yes	yes	yes	no	yes	yes	yes	yes	yes	yes	yes	yes	yes	yes	yes	yes	yes	no	yes	yes	no	hateful	no	yes	yes	no	yes	non-hateful	no	yes	hateful	yes	no	no	no	yes	yes	hateful	yes	no
The following statement was labeled non-hateful by 50% annotators: they should tie this bitch down and let everyone of those girls stab her to death welcome to hell you muzzy cunt . Is the given statement hateful?	0	yes	yes	yes	yes	yes	yes	yes	yes	yes	yes	yes	hateful	yes	yes	yes	yes	yes	yes	yes	yes	yes	yes	yes	yes	hateful	hateful	yes	yes	hateful	yes	hateful	hateful	yes	yes	yes	no	yes	yes	yes	yes	yes	yes	hateful	hateful	yes	yes	yes	yes
The following statement was labeled non-hateful by 50% annotators: get a load of that nigger . Is the given statement hateful?	1	yes	yes	yes	yes	yes	yes	yes	yes	yes	yes	yes	yes	yes	yes	yes	yes	yes	yes	yes	yes	hateful	no	yes	yes	yes	yes	hateful	yes	hateful	yes	yes	yes	hateful	yes	yes	yes	hateful	hateful	yes	hateful	yes	yes	yes	no	yes	hateful	yes	yes
The following statement was labeled non-hateful by 50% annotators: <user> everytime i see your avatar i think honky tonk . Is the given statement hateful?	1	non-hateful	non-hateful	non-hateful	non-hateful	non-hateful	non-hateful	non-hateful	non-hateful	non-hateful	non-hateful	non-hateful	non-hateful	no	non-hateful	non-hateful	non-hateful	non-hateful	non-hateful	no	non-hateful	no	non-hateful	no	non-hateful	non-hateful	non-hateful	non-hateful	non-hateful	no	non-hateful	non-hateful	non-hateful	non-hateful	non-hateful	non-hateful	non-hateful	non-hateful	non-hateful	non-hateful	non-hateful	non-hateful	no	non-hateful	non-hateful	non-hateful	no	non-hateful	no
The following statement was labeled non-hateful by 50% annotators: i wanna start twitter beef with a white christian mom . Is the given statement hateful?	1	non-hateful	non-hateful	non-hateful	non-hateful	non-hateful	non-hateful	non-hateful	non-hateful	non-hateful	no	non-hateful	non-hateful	non-hateful	non-hateful	non-hateful	non-hateful	non-hateful	non-hateful	non-hateful	no	no	no	non-hateful	non-hateful	yes	no	non-hateful	non-hateful	non-hateful	non-hateful	no	no	no	non-hateful	non-hateful	non-hateful	no	no	no	non-hateful	non-hateful	no	non-hateful	non-hateful	no	no	hateful	non-hateful
The following statement was labeled non-hateful by 50% annotators: <user> obama catch and release is an abomination on america obama should be held responsible for every american who is raped and killed by illegals . Is the given statement hateful?	1	yes	yes	hateful	yes	yes	yes	yes	yes	yes	yes	yes	yes	yes	yes	yes	yes	yes	yes	yes	yes	yes	yes	yes	hateful	yes	yes	no	yes	no	yes	hateful	hateful	hateful	hateful	yes	hateful	no	yes	yes	hateful	no	non-hateful	no	non-hateful	hateful	no	non-hateful	yes
The following statement was labeled non-hateful by 50% annotators: <user> <user> <user> you see the moral values that are clearly stated such as not committing fornication are unanimously agreed just like stealing taxes etc now if you are so confident let me ask you this islam is against fornication homosexuality occurs as a form of fornication therefore . Is the given statement hateful?	1	non-hateful	non-hateful	non-hateful	non-hateful	non-hateful	non-hateful	non-hateful	non-hateful	non-hateful	non-hateful	non-hateful	non-hateful	non-hateful	non-hateful	no	no	no	no	no	non-hateful	non-hateful	yes	non-hateful	no	non-hateful	non-hateful	hateful	non-hateful	non-hateful	non-hateful	non-hateful	yes	non-hateful	non-hateful	non-hateful	no	non-hateful	hateful	non-hateful	non-hateful	hateful	Non-hateful	hateful	non-hateful	hateful	non-hateful	yes	no
The following statement was labeled non-hateful by 50% annotators: not a problem even though i know she a mudshark i still adore her . Is the given statement hateful?	0	no	no	no	non-hateful	no	no	non-hateful	no	non-hateful	no	no	no	no	no	no	no	no	no	no	no	no	non-hateful	no	non-hateful	no	non-hateful	no	no	non-hateful	no	non-hateful	no	no	non-hateful	no	non-hateful	non-hateful	non-hateful	non-hateful	no	non-hateful	no	no	non-hateful	no	no	no	non-hateful
The following statement was labeled non-hateful by 50% annotators: i keep trying to start a petition to make abortion clinics throw the white babies in a separate dumpster from the nigger babies but they keep taking my petition down and now i must be banned cuz i cant start a new one 😡 . Is the given statement hateful?	0	yes	yes	yes	yes	yes	yes	no	yes	hateful	yes	hateful	yes	yes	yes	hateful	yes	yes	yes	yes	yes	yes	no	yes	yes	yes	hateful	yes	yes	non-hateful	hateful	hateful	no	hateful	no	yes	no	no	non-hateful	yes	yes	non-hateful	no	yes	yes	yes	yes	yes	hateful
The following statement was labeled non-hateful by 50% annotators: to infiltrate and spread islam they need to fuck off back where they came from . Is the given statement hateful?	0	yes	yes	yes	yes	yes	yes	yes	yes	yes	yes	yes	yes	yes	hateful	yes	no	no	yes	yes	yes	no	yes	yes	yes	hateful	hateful	hateful	yes	yes	yes	hateful	yes	yes	yes	no	hateful	yes	hateful	hateful	yes	no	yes	no	yes	hateful	hateful	hateful	yes
The following statement was labeled non-hateful by 50% annotators: you do not even know your dad and all you did was recycle my joke about your mom i get that you are used to stealing but try not to do it out in the open like a crack nigger . Is the given statement hateful?	0	yes	yes	yes	yes	yes	yes	yes	yes	yes	yes	yes	yes	yes	yes	yes	yes	yes	yes	yes	yes	yes	yes	yes	yes	yes	hateful	yes	yes	yes	yes	hateful	yes	hateful	yes	yes	yes	non-hateful	yes	no	hateful	yes	yes	yes	no	hateful	no	hateful	yes
The following statement was labeled non-hateful by 50% annotators: nyc bomber dam i burned my dick off wow now i am a transgender muzzrat now deblasio will pay me twice as much . Is the given statement hateful?	0	yes	no	yes	yes	yes	no	yes	yes	yes	yes	yes	no	no	yes	yes	no	yes	yes	yes	no	no	yes	yes	yes	no	yes	hateful	yes	yes	no	no	yes	no	no	no	yes	yes	non-hateful	no	yes	no	no	yes	yes	no	no	hateful	yes
The following statement was labeled non-hateful by 50% annotators: tfw a spic is a neo nazi lmao <percent> . Is the given statement hateful?	0	no	no	no	no	no	no	no	no	no	no	no	no	no	no	non-hateful	yes	no	no	hateful	no	no	non-hateful	no	no	non-hateful	no	non-hateful	yes	no	no	hateful	yes	no	hateful	no	no	no	no	yes	no	no	derogatory	no	yes	no	hateful	no	yes
The following statement was labeled non-hateful by 50% annotators: us president donald trump has welcomed a supreme court ruling allowing his travel ban to be partly reinstated as a victory for our national security america highest court also granted a white house request allowing part of its refugee ban to go into effect . Is the given statement hateful?	1	non-hateful	non-hateful	non-hateful	non-hateful	non-hateful	non-hateful	non-hateful	non-hateful	non-hateful	non-hateful	non-hateful	non-hateful	non-hateful	non-hateful	non-hateful	no	no	non-hateful	non-hateful	non-hateful	non-hateful	non-hateful	no	non-hateful	non-hateful	non-hateful	non-hateful	non-hateful	non-hateful	non-hateful	no	no	non-hateful	non-hateful	non-hateful	non-hateful	non-hateful	non-hateful	non-hateful	no	non-hateful	no	non-hateful	no	non-hateful	non-hateful	non-hateful	no
The following statement was labeled non-hateful by 50% annotators: here the funny thing about sarsour she d never dare try to pull this bullshit in a muzzie country shed need that much makeup to cover the bruises from being slapped around by their cowardly men these maggots are establishing a caliphate right under our apathetic ignorant little noses . Is the given statement hateful?	0	yes	yes	yes	yes	yes	yes	yes	yes	yes	yes	hateful	yes	yes	yes	yes	yes	yes	hateful	yes	yes	yes	yes	hateful	yes	yes	hateful	yes	yes	yes	hateful	yes	yes	yes	yes	yes	yes	hateful	hateful	no	yes	yes	hateful	yes	yes	yes	yes	yes	hateful
The following statement was labeled non-hateful by 50% annotators: <user> <user> the us has several forms of bigotry racism nativism myzoginy islamophobia anti semitism white men who are not on a receiving end of any learned to use the language of opposing one as a cover or justification for indulging in one or more of the rest . Is the given statement hateful?	1	non-hateful	non-hateful	non-hateful	non-hateful	non-hateful	non-hateful	non-hateful	non-hateful	non-hateful	non-hateful	non-hateful	no	non-hateful	non-hateful	non-hateful	non-hateful	non-hateful	non-hateful	non-hateful	non-hateful	non-hateful	non-hateful	non-hateful	no	non-hateful	non-hateful	non-hateful	no	non-hateful	non-hateful	non-hateful	non-hateful	non-hateful	non-hateful	non-hateful	non-hateful	no	non-hateful	non-hateful	hateful	no	no	non-hateful	no	non-hateful	non-hateful	non-hateful	non-hateful
The following statement was labeled non-hateful by 50% annotators: lol actually my reply was a sarcastic comment that a moslem would try to fuck a turkey . Is the given statement hateful?	0	no	no	no	no	no	no	no	no	no	non-hateful	non-hateful	non-hateful	yes	non-hateful	no	no	no	no	non-hateful	non-hateful	non-hateful	no	non-hateful	yes	yes	hateful	no	non-hateful	non-hateful	non-hateful	hateful	non-hateful	no	no	no	yes	no	no	yes	no	no	yes	no	non-hateful	non-hateful	non-hateful	non-hateful	non-hateful
The following statement was labeled non-hateful by 50% annotators: only elite looters are enriched when they import a 6 0 iq moslem onto welfare section <number> homeless vets would not need taxpayer paid classes on how to use toilets in free homes . Is the given statement hateful?	1	no	no	yes	no	non-hateful	yes	no	no	no	non-hateful	non-hateful	no	yes	no	yes	hateful	no	non-hateful	yes	no	no	no	no	no	yes	no	no	no	no	no	no	no	hateful	yes	no	non-hateful	hateful	no	no	non-hateful	no	yes	no	non-hateful	no	no	no	no
The following statement was labeled non-hateful by 50% annotators: oy vey what a kike i must be to say that . Is the given statement hateful?	0	yes	yes	yes	yes	yes	yes	yes	yes	yes	yes	yes	yes	yes	yes	yes	yes	yes	yes	yes	hateful	yes	yes	yes	yes	yes	yes	yes	yes	yes	yes	yes	no	yes	no	no	hateful	yes	yes	hateful	no	yes	yes	yes	hateful	no	non-hateful	yes	hatful
The following statement was labeled non-hateful by 50% annotators: <user> modi is the pm of whole of india he went to chennai and fucked all niggers all you could do was tweet gobackmodi . Is the given statement hateful?	1	yes	yes	yes	yes	hateful	yes	yes	yes	yes	yes	yes	yes	yes	yes	yes	yes	yes	yes	yes	hateful	no	yes	yes	yes	no	yes	yes	hateful	yes	yes	yes	non-hateful	yes	yes	yes	yes	yes	yes	hateful	yes	yes	yes	no	hateful	yes	no	no	yes
The following statement was labeled non-hateful by 50% annotators: play one game of overwatch after a month away very first game instantly has two players calling people faggots and to kill yourself oh boy i gotta just not play this game at all anymore . Is the given statement hateful?	1	yes	yes	yes	yes	yes	yes	yes	yes	yes	no	yes	yes	no	yes	yes	yes	yes	yes	yes	yes	yes	yes	yes	yes	yes	non-hateful	no	yes	yes	yes	yes	no	hateful	yes	yes	yes	yes	hateful	yes	yes	hateful	yes	yes	hateful	yes	yes	hateful	yes
The following statement was labeled non-hateful by 50% annotators: you all are sophomores in high school now why aos you wanna bring shit up and charge her scheme ass little girl . Is the given statement hateful?	1	yes	yes	yes	yes	yes	yes	yes	yes	yes	yes	yes	yes	yes	yes	yes	yes	no	yes	yes	yes	yes	yes	yes	yes	yes	yes	yes	yes	yes	no	yes	no	yes	yes	no	yes	yes	yes	no	yes	no	no	hateful	no	non-hateful	yes	no	yes
The following statement was labeled non-hateful by 50% annotators: yes world need another zhid holocaust this time not <number> million but <number> that infecting countries . Is the given statement hateful?	0	yes	yes	no	no	no	yes	no	yes	no	yes	yes	yes	yes	no	yes	yes	no	yes	yes	no	yes	yes	no	hateful	yes	yes	yes	hateful	yes	no	hateful	no	no	no	non-hateful	yes	no	yes	non-hateful	no	no	yes	non-hateful	yes	yes	no	yes	hateful
The following statement was labeled non-hateful by 50% annotators: actually yes there were irish slaves in america mostly women and girls who were allowed to work in the manors as opposed to the fields they were also forced to have sex with the negro slaves this is why many african americans today have irish or english scottish blood in them . Is the given statement hateful?	1	no	no	non-hateful	no	no	no	no	no	non-hateful	non-hateful	no	no	no	non-hateful	no	no	no	no	non-hateful	no	non-hateful	no	non-hateful	no	non-hateful	non-hateful	non-hateful	non-hateful	no	no	no	no	no	no	non-hateful	non-hateful	non-hateful	non-hateful	non-hateful	no	non-hateful	non-hateful	yes	no	non-hateful	no	non-hateful	no
The following statement was labeled non-hateful by 50% annotators: on god some of you niggas need to be euthanized and hung no cap straight fucking incels . Is the given statement hateful?	1	yes	yes	yes	yes	yes	yes	yes	yes	yes	yes	yes	yes	yes	yes	yes	yes	yes	yes	yes	yes	yes	yes	yes	yes	hateful	yes	yes	yes	yes	yes	hateful	yes	yes	hateful	no	yes	hateful	yes	no	hateful	yes	hateful	yes	no	no	yes	yes	yes
The following statement was labeled non-hateful by 50% annotators: zion goes down after slipping and tearing out of his shoes he limps off on his own power jack white in to the game . Is the given statement hateful?	1	non-hateful	non-hateful	non-hateful	non-hateful	non-hateful	non-hateful	no	non-hateful	non-hateful	non-hateful	non-hateful	non-hateful	non-hateful	no	non-hateful	non-hateful	non-hateful	no	non-hateful	non-hateful	non-hateful	no	no	non-hateful	non-hateful	no	non-hateful	non-hateful	non-hateful	non-hateful	non-hateful	no	no	non-hateful	no	non-hateful	non-hateful	no	non-hateful	no	no	no	non-hateful	yes	non-hateful	no	non-hateful	no
The following statement was labeled non-hateful by 50% annotators: i can not tell one sand nigger from the next . Is the given statement hateful?	0	yes	yes	yes	yes	yes	yes	yes	yes	yes	yes	yes	yes	yes	yes	yes	yes	yes	yes	yes	hateful	yes	yes	hateful	yes	yes	yes	hateful	yes	yes	yes	no	hateful	hateful	hateful	yes	yes	yes	hateful	yes	yes	yes	hateful	yes	hateful	yes	yes	yes	yes
The following statement was labeled non-hateful by 50% annotators: <user> <user> <user> issue why write a do gooder illegal immigrant fraudulently in the country fleeing death and persecution and not one who raped little girls or murdered a child by dismemberment because that scenario does not fit <user> narrative change the law . Is the given statement hateful?	1	non-hateful	non-hateful	non-hateful	no	non-hateful	non-hateful	no	no	no	non-hateful	no	non-hateful	non-hateful	non-hateful	no	non-hateful	no	non-hateful	non-hateful	no	non-hateful	non-hateful	non-hateful	no	no	no	non-hateful	no	non-hateful	no	non-hateful	non-hateful	yes	non-hateful	yes	non-hateful	hateful	non-hateful	non-hateful	non-hateful	no	non-hateful	no	no	no	no	non-hateful	non-hateful
The following statement was labeled non-hateful by 50% annotators: egyptians in <number> bc be like omg what am i gonna wear today and then open their closet full of white linen lmfaoo 🤣 🤣 🤣 . Is the given statement hateful?	1	non-hateful	no	non-hateful	non-hateful	no	non-hateful	non-hateful	non-hateful	no	non-hateful	non-hateful	non-hateful	no	no	no	no	non-hateful	non-hateful	non-hateful	non-hateful	no	no	no	non-hateful	yes	no	no	non-hateful	non-hateful	non-hateful	non-hateful	non-hateful	non-hateful	non-hateful	no	no	non-hateful	no	non-hateful	non-hateful	non-hateful	no	no	no	no	non-hateful	non-hateful	non-hateful
The following statement was labeled non-hateful by 50% annotators: this is so disgusting a lot of single mother leftist aka liberal women do this kind of shit with their sons to varying degrees they are intentionally conditioning their sons to be gay because they are embittered towards men men who in most cases they drove away with their leftist bullshit . Is the given statement hateful?	0	yes	yes	yes	yes	yes	yes	yes	yes	yes	yes	yes	yes	yes	yes	yes	yes	yes	yes	yes	no	yes	yes	yes	hateful	yes	yes	yes	yes	yes	yes	non-hateful	yes	yes	non-hateful	hateful	yes	hateful	yes	no	yes	yes	no	yes	yes	hateful	hateful	yes	yes
The following statement was labeled non-hateful by 50% annotators: prolly heard im a hoe from a hoe . Is the given statement hateful?	1	yes	yes	yes	yes	no	yes	yes	yes	yes	yes	yes	yes	yes	yes	no	yes	no	yes	yes	no	no	yes	yes	yes	hateful	yes	yes	no	hateful	yes	yes	yes	yes	yes	yes	yes	no	yes	yes	yes	no	yes	no	yes	no	yes	yes	no
The following statement was labeled non-hateful by 50% annotators: a nigga really raped ody that shit is really irking my shit . Is the given statement hateful?	1	yes	yes	yes	yes	yes	yes	yes	yes	yes	yes	yes	yes	yes	hateful	yes	yes	hateful	hateful	yes	yes	yes	yes	yes	yes	hateful	yes	yes	hateful	hateful	yes	yes	yes	hateful	yes	yes	yes	yes	yes	yes	yes	hateful	hateful	yes	yes	hateful	hateful	yes	hateful
The following statement was labeled non-hateful by 50% annotators: the left wants you to believe that the word nigger defines a race but it does not it defines a character . Is the given statement hateful?	0	no	no	no	no	no	no	no	no	no	no	no	no	no	yes	no	no	no	no	no	no	no	no	no	yes	no	no	no	no	yes	no	no	yes	no	hateful	no	non-hateful	no	no	no	no	no	no	non-hateful	hateful	non-hateful	no	hateful	no
The following statement was labeled non-hateful by 50% annotators: we are literally going to have this taken down eventually it one thing if you are a kike it another if you are a kike dog . Is the given statement hateful?	0	no	no	no	yes	no	no	no	yes	yes	no	no	no	no	no	no	no	no	no	non-hateful	no	yes	non-hateful	no	no	no	no	no	non-hateful	no	non-hateful	no	yes	non-hateful	no	no	no	no	yes	non-hateful	no	non-hateful	hateful	no	yes	no	yes	non-hateful	non-hateful
The following statement was labeled non-hateful by 50% annotators: oomf just said ‘ they might not be nazi ’ they just hate jews ’ . Is the given statement hateful?	0	yes	yes	yes	yes	yes	yes	yes	yes	yes	yes	yes	yes	yes	yes	yes	yes	yes	yes	yes	yes	yes	yes	yes	yes	no	yes	no	yes	yes	no	yes	no	hateful	yes	no	no	yes	hateful	yes	yes	no	hateful	hateful	yes	yes	hateful	yes	hateful
The following statement was labeled non-hateful by 50% annotators: what part of they want to kill us regardless is so difficult to grasp that all i have been saying yet you lot are so erroneously laser focused on the jews that you are likely to let a moslem take you by the hand . Is the given statement hateful?	1	no	non-hateful	no	non-hateful	no	non-hateful	non-hateful	no	no	non-hateful	no	non-hateful	no	non-hateful	non-hateful	no	yes	non-hateful	no	no	no	no	yes	no	yes	no	no	no	non-hateful	hateful	no	no	no	non-hateful	non-hateful	no	yes	non-hateful	non-hateful	no	no	non-hateful	non-hateful	yes	yes	no	non-hateful	non-hateful
The following statement was labeled non-hateful by 50% annotators: i just want some titties man that it if i could wake up to some titties i d be fine . Is the given statement hateful?	1	no	no	no	no	no	no	no	no	no	no	no	no	no	no	no	no	no	non-hateful	no	no	non-hateful	non-hateful	non-hateful	non-hateful	no	non-hateful	no	no	no	no	non-hateful	no	non-hateful	no	no	non-hateful	non-hateful	no	non-hateful	non-hateful	no	no	no	no	no	non-hateful	no	no
The following statement was labeled non-hateful by 50% annotators: season <number> of 90 day fiance i have feelings about this seemingly cute couple danny white pa and amy biracial south africa . Is the given statement hateful?	1	non-hateful	no	non-hateful	non-hateful	non-hateful	non-hateful	non-hateful	non-hateful	no	no	no	non-hateful	no	no	non-hateful	no	no	no	no	non-hateful	non-hateful	non-hateful	non-hateful	no	non-hateful	no	no	no	no	non-hateful	non-hateful	no	no	non-hateful	non-hateful	non-hateful	non-hateful	no	non-hateful	non-hateful	non-hateful	non-hateful	no	no	no	non-hateful	non-hateful	non-hateful
The following statement was labeled non-hateful by 50% annotators: shannon sharpe is a nigger that talks like he has a mouthful of marbles . Is the given statement hateful?	0	yes	yes	yes	yes	yes	yes	yes	yes	yes	yes	yes	yes	hateful	yes	yes	yes	yes	yes	yes	yes	hateful	yes	yes	yes	yes	yes	yes	yes	hateful	yes	yes	yes	hateful	yes	yes	yes	yes	yes	yes	yes	yes	yes	yes	no	yes	no	hateful	hateful
The following statement was labeled non-hateful by 50% annotators: <user> <user> i ain ’ t from br and i know this bitch word for word 😂 . Is the given statement hateful?	1	yes	yes	yes	yes	yes	no	yes	yes	yes	yes	yes	no	yes	no	yes	yes	yes	yes	yes	yes	no	yes	yes	yes	hateful	yes	yes	yes	yes	non-hateful	no	yes	hateful	no	yes	yes	yes	no	yes	non-hateful	hateful	no	no	(50%)	hateful	yes	hateful	yes
The following statement was labeled non-hateful by 50% annotators: we are going to kill jews unequivocally and force them breed with niggers and sand niggers and spics . Is the given statement hateful?	0	hateful	yes	yes	hateful	yes	hateful	yes	hateful	yes	hateful	yes	yes	hateful	yes	yes	hateful	hateful	yes	yes	hateful	yes	yes	yes	hateful	yes	hateful	yes	hateful	yes	hateful	yes	yes	yes	yes	hateful	hateful	yes	yes	yes	yes	yes	hateful	yes	yes	yes	hateful	hateful	hateful
The following statement was labeled non-hateful by 50% annotators: domestic violence is domestic violence regardless of the sex involved johnny depp . Is the given statement hateful?	1	non-hateful	non-hateful	non-hateful	non-hateful	non-hateful	non-hateful	non-hateful	non-hateful	non-hateful	non-hateful	non-hateful	non-hateful	non-hateful	non-hateful	non-hateful	no	non-hateful	non-hateful	non-hateful	non-hateful	non-hateful	no	non-hateful	non-hateful	non-hateful	non-hateful	no	non-hateful	non-hateful	non-hateful	non-hateful	non-hateful	no	non-hateful	no	non-hateful	non-hateful	no	non-hateful	non-hateful	no	no	no	no	non-hateful	no	non-hateful	non-hateful
The following statement was labeled non-hateful by 50% annotators: <user> <user> <user> <user> in the newspapers the guy used a samurai sword school attacks with samurai swords are really specific morné harmse white nerdy terrorist killed african people anton lundin pettersson white nerdy terrorist hate crime adam lanza white nerdy terrorist sexism . Is the given statement hateful?	1	non-hateful	non-hateful	non-hateful	non-hateful	non-hateful	non-hateful	non-hateful	non-hateful	no	non-hateful	non-hateful	non-hateful	non-hateful	non-hateful	non-hateful	no	non-hateful	non-hateful	non-hateful	non-hateful	non-hateful	non-hateful	non-hateful	no	yes	non-hateful	no	no	no	yes	non-hateful	non-hateful	no	yes	0	yes	non-hateful	yes	non-hateful	no	non-hateful	no	hateful	yes	yes	non-hateful	non-hateful	yes
The following statement was labeled non-hateful by 50% annotators: it is a sad day when the almighty shows you to your knees he commands you to care for women not rule over them give and take balance fairness you have clearly been burned maybe because your women would not live with your arrogance and latent misogyny . Is the given statement hateful?	0	no	no	no	no	non-hateful	yes	no	no	non-hateful	no	yes	no	non-hateful	no	non-hateful	non-hateful	non-hateful	non-hateful	no	no	non-hateful	non-hateful	no	no	no	yes	no	non-hateful	no	yes	no	non-hateful	no	no	no	non-hateful	no	no	no	non-hateful	yes	non-hateful	non-hateful	no	non-hateful	non-hateful	yes	no
The following statement was labeled non-hateful by 50% annotators: south africans should not come to the usa they should stay and fight if <number> m whites can not whip 1 0 x their number in niggers they are not real whites the usa will not save you we are a bunch of kiked out christian faggots not unlike yeah good luck pieter pooeters . Is the given statement hateful?	0	hateful	hateful	yes	yes	hateful	hateful	hateful	yes	yes	hateful	hateful	hateful	yes	hateful	yes	hateful	yes	hateful	hateful	yes	yes	hateful	hateful	yes	hateful	hateful	hateful	hateful	yes	hateful	yes	hateful	hateful	yes	hateful	non-hateful	yes	yes	yes	hateful	yes	yes	hateful	no	no	hateful	yes	hateful
The following statement was labeled non-hateful by 50% annotators: twitter is a ghetto that wants to shut down divergent thought any time or effort placed on that platform is an utter waste do not use twitter as a barometer of success it rigged against us . Is the given statement hateful?	1	no	no	no	no	no	yes	no	non-hateful	no	no	non-hateful	yes	hateful	non-hateful	no	hateful	no	non-hateful	yes	no	yes	no	no	hateful	non-hateful	non-hateful	no	yes	non-hateful	non-hateful	yes	non-hateful	no	non-hateful	yes	0	non-hateful	no	no	yes	non-hateful	no	yes	hateful	no	non-hateful	no	yes
The following statement was labeled non-hateful by 50% annotators: <user> pakistan is created for muslims so no muslim refugee in india anymore . Is the given statement hateful?	1	non-hateful	non-hateful	non-hateful	non-hateful	non-hateful	non-hateful	non-hateful	non-hateful	non-hateful	no	non-hateful	non-hateful	non-hateful	non-hateful	non-hateful	no	non-hateful	non-hateful	non-hateful	non-hateful	no	no	non-hateful	no	non-hateful	non-hateful	non-hateful	non-hateful	no	non-hateful	non-hateful	non-hateful	non-hateful	non-hateful	non-hateful	yes	non-hateful	no	non-hateful	no	non-hateful	non-hateful	non-hateful	non-hateful	non-hateful	non-hateful	no	non-hateful
The following statement was labeled non-hateful by 50% annotators: trump is a fucking kike liar . Is the given statement hateful?	0	yes	yes	yes	yes	yes	yes	yes	yes	yes	yes	yes	yes	yes	yes	yes	yes	yes	yes	yes	yes	yes	yes	yes	yes	hateful	hateful	hateful	yes	yes	yes	yes	hateful	yes	hateful	yes	hateful	yes	yes	yes	yes	yes	yes	hateful	yes	yes	yes	yes	yes
The following statement was labeled non-hateful by 50% annotators: no and legally no moeslimes get out of our usa . Is the given statement hateful?	0	yes	yes	yes	yes	yes	yes	yes	yes	yes	yes	yes	yes	yes	yes	yes	yes	hateful	yes	yes	yes	yes	no	hateful	yes	yes	yes	hateful	yes	hateful	yes	hateful	hateful	hateful	yes	yes	yes	hateful	yes	yes	yes	no	yes	yes	yes	yes	non-hateful	yes	hateful
The following statement was labeled non-hateful by 50% annotators: mike enoch got his ass handed to him by a kid yid today his debate performances are worse than his work out routine . Is the given statement hateful?	1	no	no	no	no	no	no	no	no	no	no	no	no	no	no	no	no	yes	no	non-hateful	no	no	no	no	no	yes	yes	yes	yes	no	no	yes	yes	non-hateful	yes	hateful	yes	yes	no	yes	yes	no	no	no	yes	yes	no	yes	no
The following statement was labeled non-hateful by 50% annotators: <user> looked through this guys account very islamaphobic we don ’ t need another one of those . Is the given statement hateful?	1	yes	yes	yes	yes	yes	yes	yes	yes	no	hateful	yes	yes	yes	hateful	yes	yes	yes	yes	yes	yes	yes	yes	no	yes	yes	no	hateful	non-hateful	no	non-hateful	yes	yes	yes	yes	yes	non-hateful	no	no	yes	no	hateful	no	no	no	no	non-hateful	no	no
The following statement was labeled non-hateful by 50% annotators: hey leave <user> alone his wife may be a horse faced kike but i personally saw chad punch a nigger square in the face at cville for a fat homosexual diabetes pusher he based . Is the given statement hateful?	0	yes	yes	yes	yes	yes	yes	yes	yes	yes	yes	yes	yes	yes	yes	yes	yes	no	yes	yes	yes	yes	hateful	yes	yes	yes	yes	yes	yes	yes	yes	a.	yes	yes	hateful	yes	hateful	no	yes	hateful	yes	no	yes	yes	yes	yes	no	yes	hateful
The following statement was labeled non-hateful by 50% annotators: <user> <user> <user> <user> they never said this help would include being ass raped by jimmy savile while the matrons watch -.- . Is the given statement hateful?	1	yes	no	yes	yes	yes	yes	yes	yes	yes	yes	no	no	yes	yes	yes	no	yes	yes	no	yes	no	yes	yes	yes	no	yes	hateful	yes	yes	yes	no	no	a).	no	yes	yes	yes	yes	no	no	yes	yes	yes	no	no	no	no	yes
The following statement was labeled non-hateful by 50% annotators: <number> sacks <number> fucking goddamn sacks are you fucking kidding me you fat retarded mongoloids better protect that goddamn soulless ginger jesus fucking christ <user> get your shit together . Is the given statement hateful?	0	yes	yes	yes	yes	yes	yes	yes	yes	yes	yes	yes	yes	yes	yes	yes	yes	yes	yes	yes	yes	yes	yes	yes	yes	yes	yes	yes	yes	yes	yes	no	yes	yes	yes	yes	hateful	yes	yes	yes	a).	yes	hateful	yes	1	yes	yes	yes	yes
The following statement was labeled non-hateful by 50% annotators: <user> that ’ good to know i see homosexuality was made legal in india as far back as <date> 👍 🏾 . Is the given statement hateful?	1	non-hateful	non-hateful	non-hateful	non-hateful	non-hateful	non-hateful	non-hateful	non-hateful	non-hateful	non-hateful	non-hateful	non-hateful	non-hateful	no	non-hateful	no	non-hateful	non-hateful	non-hateful	non-hateful	non-hateful	non-hateful	non-hateful	non-hateful	non-hateful	non-hateful	non-hateful	non-hateful	non-hateful	no	non-hateful	no	non-hateful	non-hateful	non-hateful	non-hateful	non-hateful	non-hateful	non-hateful	no	non-hateful	non-hateful	no	no	non-hateful	no	non-hateful	non-hateful
The following statement was labeled non-hateful by 50% annotators: mudshark sunglasses to go with your mudshark milk shake . Is the given statement hateful?	0	non-hateful	non-hateful	non-hateful	non-hateful	non-hateful	non-hateful	non-hateful	non-hateful	non-hateful	non-hateful	non-hateful	no	non-hateful	non-hateful	no	non-hateful	non-hateful	non-hateful	non-hateful	non-hateful	non-hateful	non-hateful	non-hateful	non-hateful	non-hateful	no	non-hateful	non-hateful	no	non-hateful	non-hateful	non-hateful	non-hateful	no	non-hateful	non-hateful	no	non-hateful	non-hateful	non-hateful	non-hateful	no	non-hateful	non-hateful	no	non-hateful	non-hateful	non-hateful
The following statement was labeled non-hateful by 50% annotators: weev talks about killing and raping white women <user> ‍ talks about putting gook women over white women was this shooter apart of the anti white women mgtow stormer . Is the given statement hateful?	0	yes	yes	yes	yes	yes	hateful	yes	yes	yes	yes	yes	yes	yes	yes	yes	no	yes	yes	yes	hateful	yes	yes	no	yes	hateful	yes	yes	yes	yes	no	yes	yes	yes	hateful	yes	yes	yes	hateful	yes	no	no	yes	yes	non-hateful	yes	yes	non-hateful	yes
The following statement was labeled non-hateful by 50% annotators: the constant sticking point here is in order to discuss large groups of people we have to deal in averages not individuals there are plenty of smart blacks obviously but there are way more dumb blacks than there are dumb white people or east asians . Is the given statement hateful?	0	no	no	no	no	no	no	non-hateful	no	non-hateful	no	no	no	non-hateful	yes	no	no	non-hateful	no	no	yes	no	non-hateful	non-hateful	no	yes	non-hateful	no	non-hateful	non-hateful	non-hateful	non-hateful	no	yes	non-hateful	non-hateful	no	non-hateful	no	no	yes	yes	yes	yes	no	no	yes	non-hateful	yes
The following statement was labeled non-hateful by 50% annotators: you ask niggas to be your peace and they end up being your piece of shit 😂 ✌ 🏽 june 29 wet it up pool party . Is the given statement hateful?	1	yes	yes	yes	yes	yes	yes	yes	yes	yes	no	yes	yes	yes	yes	yes	yes	hateful	yes	hateful	yes	hateful	hateful	yes	yes	hateful	hateful	yes	hateful	hateful	yes	hateful	hateful	hateful	yes	hateful	non-hateful	yes	no	yes	yes	yes	no	yes	a).	no	hateful	hateful	yes
The following statement was labeled non-hateful by 50% annotators: <user> <user> <user> <user> <user> a man of straw antifa have never killed everyone the far right white supremacist are major terrorist threats . Is the given statement hateful?	1	non-hateful	non-hateful	non-hateful	non-hateful	non-hateful	non-hateful	non-hateful	non-hateful	non-hateful	non-hateful	non-hateful	non-hateful	non-hateful	non-hateful	non-hateful	non-hateful	hateful	non-hateful	non-hateful	yes	no	non-hateful	non-hateful	non-hateful	non-hateful	non-hateful	no	non-hateful	no	hateful	no	non-hateful	non-hateful	non-hateful	non-hateful	no	non-hateful	non-hateful	non-hateful	non-hateful	non-hateful	no	non-hateful	hateful	no	non-hateful	non-hateful	no
The following statement was labeled non-hateful by 50% annotators: <user> they convicted her because to let a white person shoot a black person in their own apartment and not convict would have led to riots . Is the given statement hateful?	1	non-hateful	non-hateful	non-hateful	non-hateful	non-hateful	non-hateful	non-hateful	non-hateful	no	non-hateful	non-hateful	non-hateful	non-hateful	non-hateful	non-hateful	non-hateful	non-hateful	non-hateful	no	non-hateful	no	no	no	no	no	non-hateful	non-hateful	non-hateful	non-hateful	no	no	non-hateful	non-hateful	no	no	non-hateful	non-hateful	non-hateful	non-hateful	yes	yes	non-hateful	non-hateful	non-hateful	yes	no	no	no
The following statement was labeled non-hateful by 50% annotators: the left migrant children will undergo irreparable harm if they are separated from their mother or father also the left the nuclear family is outdated and in the event of divorce children should probably never see their dads also fag and dyke families are perfectly okay . Is the given statement hateful?	1	no	no	no	no	no	no	no	no	no	no	no	no	no	no	non-hateful	no	no	no	no	no	no	no	no	no	no	yes	no	yes	non-hateful	no	no	no	no	no	non-hateful	no	yes	non-hateful	yes	non-hateful	no	yes	no	yes	no	no	no	no
The following statement was labeled non-hateful by 50% annotators: <user> <user> white mode is elite . Is the given statement hateful?	1	non-hateful	non-hateful	non-hateful	non-hateful	non-hateful	non-hateful	non-hateful	non-hateful	non-hateful	non-hateful	non-hateful	non-hateful	non-hateful	non-hateful	non-hateful	non-hateful	non-hateful	non-hateful	no	non-hateful	no	non-hateful	non-hateful	non-hateful	no	non-hateful	non-hateful	non-hateful	non-hateful	non-hateful	non-hateful	non-hateful	non-hateful	non-hateful	non-hateful	no	non-hateful	non-hateful	non-hateful	no	no	non-hateful	no	non-hateful	non-hateful	non-hateful	non-hateful	non-hateful
The following statement was labeled non-hateful by 50% annotators: black arabs people made slaves of blacks african first then made slaves of white people who were called white gold worth a lot portuguese took from africa <number> million black slaves to brazil today <number> million africans are slaves to muslim masters so black america grow up . Is the given statement hateful?	1	non-hateful	non-hateful	no	no	non-hateful	non-hateful	non-hateful	no	non-hateful	non-hateful	non-hateful	non-hateful	no	non-hateful	non-hateful	non-hateful	non-hateful	no	no	non-hateful	no	non-hateful	no	no	no	non-hateful	non-hateful	non-hateful	non-hateful	non-hateful	no	non-hateful	no	non-hateful	non-hateful	non-hateful	no	non-hateful	no	non-hateful	non-hateful	no	no	no	non-hateful	non-hateful	non-hateful	hateful
The following statement was labeled non-hateful by 50% annotators: i fully support a race war to kill all kikes and niggers . Is the given statement hateful?	0	yes	yes	yes	yes	yes	yes	hateful	yes	yes	yes	yes	yes	yes	yes	hateful	hateful	yes	yes	yes	hateful	yes	yes	yes	hateful	yes	yes	hateful	yes	yes	yes	yes	yes	yes	yes	hateful	hateful	yes	hateful	yes	yes	hateful	hateful	yes	yes	hateful	yes	yes	hateful
The following statement was labeled non-hateful by 50% annotators: the cross is superior to the inferior crescent moon islam is beneath christianity judaism muslims pray against infidels fridayfeeling . Is the given statement hateful?	0	hateful	hateful	hateful	hateful	non-hateful	hateful	hateful	hateful	non-hateful	no	hateful	yes	hateful	yes	hateful	yes	yes	non-hateful	yes	yes	hateful	no	yes	no	hateful	yes	hateful	yes	no	hateful	yes	non-hateful	non-hateful	hateful	no	yes	yes	yes	non-hateful	hateful	yes	hateful	no	hateful	yes	non-hateful	non-hateful	hateful
The following statement was labeled non-hateful by 50% annotators: people who say all lives matter are the same kind of people who comment about there not being a straight pride 🔔 🔚 . Is the given statement hateful?	1	non-hateful	non-hateful	non-hateful	non-hateful	no	non-hateful	non-hateful	non-hateful	non-hateful	non-hateful	non-hateful	non-hateful	non-hateful	non-hateful	non-hateful	non-hateful	no	non-hateful	non-hateful	non-hateful	no	non-hateful	no	no	non-hateful	non-hateful	non-hateful	non-hateful	non-hateful	no	non-hateful	non-hateful	non-hateful	no	no	no	yes	non-hateful	non-hateful	non-hateful	no	non-hateful	no	no	no	no	no	yes
The following statement was labeled non-hateful by 50% annotators: <user> <user> <user> no incitement but doxing teenage kids continuing to incite violence via antifa and calling for children to be raped is all done by liberals and democrats . Is the given statement hateful?	1	yes	yes	yes	yes	yes	yes	yes	yes	no	yes	yes	no	no	yes	yes	yes	non-hateful	yes	hateful	yes	non-hateful	yes	yes	yes	non-hateful	yes	hateful	no	no	yes	no	yes	hateful	yes	no	yes	yes	hateful	non-hateful	non-hateful	hateful	hateful	no	non-hateful	Hateful	yes	no	yes
The following statement was labeled non-hateful by 50% annotators: we do not need anymore shit the shitskins can go live with their shitskin cousins . Is the given statement hateful?	0	yes	yes	yes	yes	yes	yes	yes	yes	yes	yes	yes	yes	yes	yes	hateful	yes	yes	hateful	yes	hateful	yes	yes	hateful	yes	hateful	no	yes	hateful	yes	hateful	no	yes	yes	yes	yes	yes	yes	yes	yes	no	yes	yes	yes	no	yes	yes	yes	yes
The following statement was labeled non-hateful by 50% annotators: no it will not we are a movement not a group of atomized individuals you are a very stupid person btw you meant dregs but you have the vocabulary of a retarded nigger . Is the given statement hateful?	0	yes	yes	yes	yes	yes	yes	yes	yes	yes	yes	yes	yes	yes	yes	yes	yes	yes	yes	yes	no	yes	yes	yes	yes	yes	yes	hateful	yes	yes	yes	hateful	yes	yes	yes	yes	yes	hateful	yes	hateful	yes	yes	yes	yes	yes	yes	yes	yes	hateful
The following statement was labeled non-hateful by 50% annotators: nope no evidence whatsoever it retarded horseshit . Is the given statement hateful?	1	yes	yes	yes	yes	yes	yes	yes	yes	yes	yes	yes	yes	yes	yes	yes	yes	yes	yes	yes	yes	yes	yes	yes	yes	yes	yes	yes	yes	yes	yes	yes	yes	yes	yes	no	yes	yes	yes	yes	yes	yes	[A].	hateful	yes	yes	yes	yes	hateful
The following statement was labeled non-hateful by 50% annotators: video games cause violence me studying so i can be a good student in persona <number> hm . Is the given statement hateful?	1	non-hateful	non-hateful	non-hateful	non-hateful	non-hateful	non-hateful	non-hateful	non-hateful	non-hateful	non-hateful	non-hateful	non-hateful	non-hateful	non-hateful	non-hateful	non-hateful	non-hateful	non-hateful	non-hateful	non-hateful	non-hateful	non-hateful	non-hateful	no	non-hateful	non-hateful	non-hateful	non-hateful	non-hateful	no	non-hateful	no	hateful	non-hateful	non-hateful	non-hateful	non-hateful	no	non-hateful	non-hateful	non-hateful	no	non-hateful	no	non-hateful	non-hateful	no	non-hateful
The following statement was labeled non-hateful by 50% annotators: <number> should i fuck my mother before or after it comes out that he also a muzzie <number> would i not have to fuck my mother if i waited till it came out that he was a muzzie and then pointed that fact out . Is the given statement hateful?	0	no	no	no	no	yes	no	non-hateful	no	no	no	no	no	no	no	no	no	no	non-hateful	no	non-hateful	no	no	no	no	non-hateful	no	no	non-hateful	no	no	no	non-hateful	no	no	no	no	yes	non-hateful	yes	yes	yes	no	no	non-hateful	yes	non-hateful	no	non-hateful
The following statement was labeled non-hateful by 50% annotators: being a disgusting fat dike should be illegal . Is the given statement hateful?	0	yes	yes	yes	yes	yes	yes	hateful	yes	yes	yes	yes	hateful	yes	hateful	yes	yes	yes	hateful	hateful	yes	hateful	yes	yes	yes	yes	yes	yes	yes	yes	yes	yes	yes	yes	yes	yes	yes	yes	yes	hateful	yes	yes	no	hateful	yes	hateful	yes	yes	yes
The following statement was labeled non-hateful by 50% annotators: □ heterosexual □ homosexual ■ minsung shipper . Is the given statement hateful?	1	non-hateful	non-hateful	no	non-hateful	non-hateful	non-hateful	no	no	non-hateful	non-hateful	no	non-hateful	no	non-hateful	non-hateful	non-hateful	no	non-hateful	no	no	non-hateful	non-hateful	non-hateful	non-hateful	non-hateful	no	non-hateful	non-hateful	no	non-hateful	no	no	non-hateful	non-hateful	no	non-hateful	no	non-hateful	non-hateful	no	non-hateful	no	no	no	non-hateful	non-hateful	non-hateful	non-hateful
The following statement was labeled non-hateful by 50% annotators: <user> this whole thread is chock full of white folks i am <number> i have been eating kale my whole life my grandma grew kale and collards in her garden of course we never ate it raw bc that wasn t a thing you all do not like it bc you do not really know it . Is the given statement hateful?	1	non-hateful	non-hateful	non-hateful	non-hateful	non-hateful	non-hateful	non-hateful	non-hateful	non-hateful	non-hateful	non-hateful	non-hateful	non-hateful	non-hateful	no	no	non-hateful	no	non-hateful	non-hateful	non-hateful	non-hateful	non-hateful	non-hateful	no	non-hateful	no	non-hateful	non-hateful	non-hateful	no	no	non-hateful	non-hateful	non-hateful	non-hateful	non-hateful	non-hateful	non-hateful	non-hateful	no	non-hateful	no	no	non-hateful	no	non-hateful	yes
The following statement was labeled non-hateful by 50% annotators: let me apologize to those fine folks who followed me i just got busy with work have not had time to focus on gab i am a little retarded like that single minded if you will when time allows i will find some folks to follow become more active . Is the given statement hateful?	1	no	no	no	no	no	no	no	no	no	yes	no	no	no	no	no	no	yes	no	no	no	no	no	non-hateful	no	no	no	non-hateful	no	yes	no	no	no	non-hateful	yes	non-hateful	no	non-hateful	yes	no	non-hateful	no	no	i.	no	no	no	no	yes
The following statement was labeled non-hateful by 50% annotators: bbc news this man is wanted by the police for ripping the hijab off a young moslem woman he also screamed racist abuse at her before running off laughing . Is the given statement hateful?	1	yes	yes	yes	yes	yes	yes	yes	yes	yes	hateful	yes	yes	yes	yes	yes	yes	hateful	yes	yes	yes	yes	yes	yes	non-hateful	yes	yes	yes	yes	yes	yes	yes	non-hateful	hateful	yes	non-hateful	yes	non-hateful	yes	yes	yes	no	yes	hateful	yes	yes	hateful	hateful	yes
The following statement was labeled non-hateful by 50% annotators: gabfam if it takes a civil war islam will be destroyed in america along with cair national . Is the given statement hateful?	0	no	non-hateful	non-hateful	no	no	non-hateful	no	no	non-hateful	no	no	no	no	non-hateful	no	no	non-hateful	no	no	hateful	hateful	non-hateful	non-hateful	no	no	no	no	non-hateful	non-hateful	non-hateful	no	non-hateful	no	no	non-hateful	non-hateful	non-hateful	no	yes	no	yes	no	non-hateful	yes	no	no	hateful	non-hateful
The following statement was labeled non-hateful by 50% annotators: <user> sorry <user> but citizens of nyc can bail out their own citizen workers federal tax money is needed to take care of illegal immigrants in detention centers . Is the given statement hateful?	1	no	no	no	no	no	no	no	non-hateful	no	non-hateful	no	non-hateful	no	no	no	no	no	no	no	non-hateful	no	non-hateful	non-hateful	no	no	no	non-hateful	non-hateful	no	non-hateful	no	no	no	non-hateful	yes	non-hateful	yes	no	non-hateful	No	no	yes	no	no	no	hateful	hateful	non-hateful
The following statement was labeled non-hateful by 50% annotators: <user> <user> most of their jokes revolve around the concept of finding new ways to detail a fictitious account of each others mother prostitute life who is a faggot and who is weak if he not willing to join in . Is the given statement hateful?	1	yes	hateful	yes	yes	yes	yes	yes	yes	hateful	yes	yes	hateful	yes	hateful	yes	hateful	yes	yes	yes	hateful	yes	yes	yes	yes	hateful	hateful	yes	no	yes	yes	hateful	yes	yes	hateful	yes	non-hateful	yes	yes	no	hateful	hateful	hateful	hateful	yes	hateful	yes	yes	hateful
The following statement was labeled non-hateful by 50% annotators: she single cuz she can not find a nigga worth her time ✍ 🏼 . Is the given statement hateful?	1	yes	yes	yes	yes	yes	yes	yes	yes	yes	yes	yes	yes	yes	yes	yes	yes	yes	yes	hateful	yes	yes	yes	yes	yes	yes	hateful	hateful	yes	hateful	yes	yes	yes	yes	yes	yes	hateful	yes	yes	hateful	yes	hateful	yes	hateful	yes	hateful	yes	yes	yes
The following statement was labeled non-hateful by 50% annotators: <user> donald probably tought he got raped or something . Is the given statement hateful?	1	no	non-hateful	no	no	no	no	no	no	no	no	non-hateful	non-hateful	non-hateful	no	no	no	non-hateful	non-hateful	non-hateful	no	non-hateful	no	no	no	no	no	no	non-hateful	no	no	no	non-hateful	no	non-hateful	non-hateful	no	non-hateful	non-hateful	non-hateful	no	no	non-hateful	no	non-hateful	non-hateful	non-hateful	no	non-hateful
The following statement was labeled non-hateful by 50% annotators: <user> lol nazi white trash is exactly like poor mexicans here theyre called colombias same balance of poor dumbness . Is the given statement hateful?	0	no	yes	no	hateful	no	yes	yes	yes	yes	yes	no	yes	no	non-hateful	yes	no	no	yes	no	no	no	non-hateful	non-hateful	non-hateful	non-hateful	non-hateful	yes	hateful	yes	no	yes	non-hateful	yes	no	hateful	no	yes	hateful	no	yes	non-hateful	hateful	no	no	yes	yes	no	non-hateful
The following statement was labeled non-hateful by 50% annotators: it scary really the far left has successfully brainwashed most white kids of my generation into self hatred and white guilt i have literally been told by a hispanic that you can not enjoy football because you are white and that not racism to my peers unbelievable . Is the given statement hateful?	1	non-hateful	non-hateful	non-hateful	non-hateful	non-hateful	non-hateful	non-hateful	non-hateful	non-hateful	no	non-hateful	non-hateful	non-hateful	non-hateful	non-hateful	non-hateful	no	non-hateful	non-hateful	non-hateful	non-hateful	non-hateful	no	non-hateful	non-hateful	non-hateful	no	yes	non-hateful	no	non-hateful	non-hateful	non-hateful	no	non-hateful	non-hateful	no	non-hateful	non-hateful	no	no	non-hateful	non-hateful	non-hateful	non-hateful	no	non-hateful	hateful
The following statement was labeled non-hateful by 50% annotators: chop stick with the wood send a nigga to jesus . Is the given statement hateful?	1	yes	yes	yes	yes	yes	yes	yes	yes	yes	yes	yes	yes	yes	yes	yes	yes	yes	yes	yes	yes	yes	yes	yes	yes	no	yes	yes	yes	no	yes	yes	hateful	yes	yes	yes	yes	yes	yes	yes	yes	yes	hateful	yes	yes	hateful	yes	yes	hateful
The following statement was labeled non-hateful by 50% annotators: skank mudshark has to shop at the dollar store cause shes a single mom . Is the given statement hateful?	0	yes	yes	yes	yes	yes	yes	yes	yes	yes	no	yes	hateful	yes	yes	hateful	no	no	yes	yes	yes	yes	yes	yes	yes	yes	yes	no	yes	yes	yes	no	yes	yes	non-hateful	yes	yes	yes	no	yes	yes	yes	no	yes	yes	hateful	yes	yes	yes
The following statement was labeled non-hateful by 50% annotators: insanity but the millennial fools will suck it up yeah little white suburban snowflakes females go fuck a nigger for equality lmfao fools die . Is the given statement hateful?	0	yes	yes	yes	yes	yes	yes	yes	yes	yes	hateful	yes	yes	hateful	yes	yes	yes	yes	yes	hateful	yes	hateful	yes	yes	yes	yes	hateful	yes	yes	hateful	yes	hateful	yes	yes	hateful	yes	yes	hateful	yes	yes	yes	no	yes	hateful	yes	(i)	yes	yes	yes
The following statement was labeled non-hateful by 50% annotators: when i was growing up you could go to a malt shop and order a black cow it was a coke with choc ice cream now it refers to fat nigger women . Is the given statement hateful?	0	yes	yes	yes	yes	yes	yes	yes	yes	yes	yes	yes	yes	yes	yes	yes	yes	yes	yes	yes	no	yes	yes	yes	no	no	yes	no	yes	yes	yes	no	yes	yes	yes	yes	yes	yes	non-hateful	yes	yes	hateful	yes	yes	no	yes	yes	yes	yes
The following statement was labeled non-hateful by 50% annotators: dear muslims take heed on your actions cause much is to be said to a country who has shooting ranges and women can shoot back and men can shoot natshit out of pepper so get on ur rug and pray u are gonna need it . Is the given statement hateful?	0	yes	yes	yes	yes	yes	yes	yes	yes	yes	no	yes	yes	yes	non-hateful	yes	yes	yes	yes	yes	yes	yes	hateful	yes	non-hateful	yes	yes	yes	non-hateful	hateful	hateful	yes	yes	yes	yes	a).	yes	non-hateful	yes	yes	yes	yes	no	no	no	no	no	yes	no
The following statement was labeled non-hateful by 50% annotators: y ’ all got all the hoes . Is the given statement hateful?	1	yes	yes	yes	yes	yes	yes	yes	yes	yes	yes	yes	yes	yes	yes	yes	yes	yes	yes	yes	yes	yes	no	yes	yes	yes	yes	yes	no	yes	yes	yes	no	yes	yes	yes	yes	yes	yes	yes	no	hateful	yes	yes	yes	yes	yes	a).	yes
The following statement was labeled non-hateful by 50% annotators: yes the bear and eagle imagination equivalent to a nigger . Is the given statement hateful?	0	yes	yes	yes	yes	yes	yes	yes	yes	yes	yes	yes	yes	yes	yes	yes	yes	yes	yes	yes	hateful	no	yes	yes	yes	yes	yes	no	yes	yes	yes	no	no	no	hateful	yes	yes	non-hateful	no	no	yes	yes	no	yes	yes	yes	yes	no	yes
The following statement was labeled non-hateful by 50% annotators: <user> happy belated bday muzzy excited to see where <number> takes you 🕺 🏼 👊 🏻 . Is the given statement hateful?	1	non-hateful	non-hateful	non-hateful	non-hateful	non-hateful	non-hateful	non-hateful	non-hateful	non-hateful	non-hateful	non-hateful	non-hateful	non-hateful	no	non-hateful	no	non-hateful	non-hateful	non-hateful	non-hateful	non-hateful	no	no	no	non-hateful	non-hateful	no	no	non-hateful	non-hateful	non-hateful	non-hateful	non-hateful	non-hateful	non-hateful	no	no	non-hateful	non-hateful	non-hateful	no	non-hateful	non-hateful	non-hateful	non-hateful	no	non-hateful	non-hateful
The following statement was labeled non-hateful by 50% annotators: <user> progressives socialists democrats know their only way to stay in power is through illegal aliens americans know they do not care about us . Is the given statement hateful?	1	yes	yes	yes	yes	yes	yes	yes	non-hateful	non-hateful	yes	non-hateful	yes	yes	yes	hateful	hateful	no	yes	yes	hateful	yes	non-hateful	hateful	no	non-hateful	no	non-hateful	non-hateful	hateful	hateful	non-hateful	no	yes	yes	hateful	no	hateful	non-hateful	yes	hateful	no	yes	no	non-hateful	yes	hateful	no	hateful
The following statement was labeled non-hateful by 50% annotators: somehow i lost track of how many men i have slept with but i can still name all the women . Is the given statement hateful?	1	non-hateful	non-hateful	non-hateful	non-hateful	non-hateful	non-hateful	non-hateful	non-hateful	non-hateful	non-hateful	non-hateful	non-hateful	non-hateful	non-hateful	non-hateful	non-hateful	non-hateful	non-hateful	non-hateful	non-hateful	non-hateful	non-hateful	non-hateful	non-hateful	no	non-hateful	non-hateful	non-hateful	no	non-hateful	non-hateful	non-hateful	no	non-hateful	no	no	non-hateful	non-hateful	non-hateful	no	non-hateful	non-hateful	Non-hateful	non-hateful	non-hateful	no	non-hateful	no
The following statement was labeled non-hateful by 50% annotators: <user> it de blasio a libtard illegal and moslem supporter . Is the given statement hateful?	0	yes	yes	yes	yes	yes	yes	yes	yes	yes	yes	yes	yes	yes	yes	yes	yes	hateful	hateful	yes	non-hateful	yes	yes	yes	yes	no	yes	yes	yes	yes	yes	yes	yes	no	yes	yes	yes	yes	no	yes	no	yes	hateful	yes	yes	no	non-hateful	no	yes
The following statement was labeled non-hateful by 50% annotators: looks like lee rigby beheading must have happened on a moslem holy day since they carried out the manchester attack on it anniversary i see a market for t shirts that say wearer carries bacon bits to send moslems to hell do not blow near me . Is the given statement hateful?	0	yes	yes	yes	yes	yes	yes	hateful	yes	yes	yes	no	yes	yes	yes	yes	hateful	hateful	yes	non-hateful	hateful	yes	hateful	yes	no	yes	yes	no	non-hateful	no	hateful	yes	yes	hateful	yes	hateful	yes	hateful	hateful	non-hateful	yes	yes	hateful	yes	hateful	non-hateful	yes	no	no
The following statement was labeled non-hateful by 50% annotators: curanis are nigger jews . Is the given statement hateful?	0	yes	yes	yes	yes	hateful	yes	yes	yes	hateful	yes	yes	hateful	yes	hateful	yes	yes	yes	hateful	yes	yes	yes	yes	hateful	hateful	yes	hateful	hateful	yes	hateful	yes	no	hateful	yes	hateful	yes	yes	yes	hateful	yes	yes	hateful	yes	no	hateful	yes	hateful	yes	hateful
The following statement was labeled non-hateful by 50% annotators: there is no epidemic of gun violence in america quite the opposite in fact but last week shooting at a high school in florida was a grim and jarring reminder of deep cultural problems lurking just beneath the veneer of our materially comfortable society . Is the given statement hateful?	1	non-hateful	non-hateful	non-hateful	non-hateful	non-hateful	non-hateful	non-hateful	non-hateful	non-hateful	non-hateful	non-hateful	non-hateful	non-hateful	non-hateful	non-hateful	non-hateful	non-hateful	non-hateful	non-hateful	non-hateful	non-hateful	non-hateful	non-hateful	non-hateful	non-hateful	non-hateful	non-hateful	non-hateful	non-hateful	non-hateful	non-hateful	non-hateful	non-hateful	non-hateful	non-hateful	non-hateful	non-hateful	no	non-hateful	non-hateful	non-hateful	non-hateful	non-hateful	non-hateful	non-hateful	non-hateful	no	non-hateful
The following statement was labeled non-hateful by 50% annotators: i am not the majical hefer that can save sucker boys from being chimp niggers they desperately search for titties to latch on to here a solution call me crazy stop being a sucker . Is the given statement hateful?	0	yes	yes	yes	yes	yes	yes	yes	yes	yes	yes	yes	yes	yes	yes	yes	yes	yes	yes	yes	hateful	yes	yes	yes	yes	yes	yes	yes	yes	yes	yes	no	yes	yes	yes	hateful	yes	yes	Yes	yes	yes	no	yes	yes	yes	non-hateful	yes	yes	hateful
The following statement was labeled non-hateful by 50% annotators: and do not get me wrong either i only have a few muted i did not enjoy another clown telling me that sharia was the only way and women should submit or die i do not have time for that shit especially with a household full of ladies including the cat . Is the given statement hateful?	1	no	no	no	no	no	no	no	yes	no	no	non-hateful	no	no	yes	no	no	yes	yes	yes	yes	yes	non-hateful	no	yes	yes	no	yes	no	non-hateful	hateful	yes	non-hateful	yes	non-hateful	non-hateful	non-hateful	yes	no	yes	no	hateful	non-hateful	yes	no	no	no	yes	non-hateful
The following statement was labeled non-hateful by 50% annotators: just what we need a sandnigger goatfucker for governor ffs . Is the given statement hateful?	0	yes	yes	yes	yes	yes	yes	yes	yes	yes	yes	yes	yes	yes	yes	yes	yes	yes	yes	yes	yes	hateful	yes	yes	yes	yes	yes	yes	yes	hateful	yes	hateful	yes	hateful	yes	hateful	yes	yes	yes	yes	yes	yes	yes	yes	no	hateful	yes	yes	yes
The following statement was labeled non-hateful by 50% annotators: <user> i hate you . Is the given statement hateful?	0	yes	yes	yes	yes	yes	yes	yes	yes	yes	yes	yes	yes	yes	yes	yes	yes	yes	hateful	yes	yes	yes	hateful	yes	yes	yes	yes	no	hateful	yes	yes	hateful	yes	hateful	hateful	no	yes	hateful	yes	hateful	no	no	hateful	yes	yes	yes	yes	hateful	hateful
The following statement was labeled non-hateful by 50% annotators: <user> so its not only old muzzy men who are pedophiles muzzy women can marry little children too . Is the given statement hateful?	0	no	no	no	no	no	yes	yes	yes	no	yes	no	non-hateful	yes	no	no	no	no	yes	no	no	yes	no	yes	non-hateful	yes	no	no	yes	no	no	yes	non-hateful	no	non-hateful	non-hateful	yes	no	yes	no	yes	no	no	no	non-hateful	non-hateful	non-hateful	non-hateful	yes
The following statement was labeled non-hateful by 50% annotators: lasvegasshooting lasvegas who do u trust isis fbi msm so far isis greater credibility and now dominate narrative in muslim world what westerners believe utterly irrelevant isis winning muslim hearts and minds who dominate through rape crime impudence violence in modern west . Is the given statement hateful?	0	yes	no	no	no	yes	yes	yes	yes	non-hateful	yes	no	yes	no	non-hateful	yes	no	no	no	yes	no	yes	no	no	non-hateful	no	no	hateful	yes	yes	yes	no	non-hateful	ii.	non-hateful	no	non-hateful	yes	non-hateful	no	hateful	non-hateful	hateful	yes	yes	yes	non-hateful	hateful	no
The following statement was labeled non-hateful by 50% annotators: <number> taxi drivers sentenced and <number> more suspended in newcastle for raping and grooming children why is not this headline news bbc i will tell you it is because they are all pakistani heritage muslims who single out white children to groom and rape ignored by our liberal elite . Is the given statement hateful?	1	yes	yes	yes	yes	hateful	yes	yes	yes	yes	yes	yes	yes	yes	yes	yes	yes	hateful	hateful	yes	no	no	hateful	no	yes	yes	yes	yes	hateful	yes	yes	hateful	yes	yes	non-hateful	yes	yes	non-hateful	yes	hateful	hateful	hateful	hateful	yes	yes	hateful	no	yes	non-hateful
The following statement was labeled non-hateful by 50% annotators: i think you indeed can call people nigger if you so please . Is the given statement hateful?	0	yes	yes	yes	yes	yes	yes	yes	yes	yes	yes	yes	no	yes	yes	yes	yes	yes	no	yes	hateful	yes	no	non-hateful	yes	yes	yes	no	hateful	no	no	hateful	no	yes	hateful	yes	no	non-hateful	yes	hateful	hateful	yes	yes	yes	no	yes	non-hateful	yes	yes
The following statement was labeled non-hateful by 50% annotators: as tears ran down cardinal timothy dolan fat cheeks he begged that all the refugee immigrant muds not be deported for he knew he needed a fresh supply of brown boy meat racistfanfiction . Is the given statement hateful?	0	yes	yes	yes	yes	yes	yes	yes	yes	yes	yes	yes	yes	yes	yes	yes	yes	yes	yes	yes	yes	yes	yes	yes	yes	yes	yes	hateful	yes	yes	no	hateful	hateful	yes	yes	hateful	hateful	yes	non-hateful	yes	non-hateful	non-hateful	hateful	hateful	yes	yes	yes	yes	yes
The following statement was labeled non-hateful by 50% annotators: black race sucks because i am surrounded by pot smoking unemployed welfare leeching niglet making prison worthy niggers and i hate them . Is the given statement hateful?	0	yes	yes	yes	yes	yes	yes	yes	yes	yes	yes	yes	yes	yes	yes	hateful	yes	hateful	yes	yes	yes	hateful	yes	yes	yes	hateful	hateful	yes	yes	yes	yes	yes	yes	hateful	hateful	yes	yes	yes	yes	hateful	yes	hateful	yes	yes	hateful	yes	hateful	yes	yes
The following statement was labeled non-hateful by 50% annotators: i got in trouble with the twitters for messing with bots what a fucking nigger . Is the given statement hateful?	0	yes	yes	yes	yes	yes	yes	yes	yes	yes	yes	yes	yes	yes	yes	yes	yes	yes	yes	yes	yes	yes	yes	yes	yes	yes	yes	yes	hateful	yes	yes	yes	yes	yes	yes	yes	yes	no	yes	yes	hateful	yes	yes	yes	no	yes	hateful	no	yes
The following statement was labeled non-hateful by 50% annotators: <user> not our problem we are not the only nation in the entire world who can save those illegal aliens p.s. refugee has a very specific legal meaning and you are purposely misusing it in order to euphemize illegal immigration . Is the given statement hateful?	1	no	no	non-hateful	no	no	no	yes	yes	no	no	no	no	no	yes	no	no	non-hateful	no	yes	non-hateful	no	no	non-hateful	no	no	non-hateful	no	no	no	non-hateful	yes	yes	non-hateful	yes	yes	NO	non-hateful	no	no	no	non-hateful	no	hateful	hateful	non-hateful	no	yes	hateful
The following statement was labeled non-hateful by 50% annotators: <user> loving the new season of your show when you said go be a nigger somewhere else i laughed so hard people at work wanted to know what was funny keep it up and god speed . Is the given statement hateful?	1	yes	yes	yes	yes	yes	yes	yes	yes	no	yes	yes	yes	yes	yes	yes	yes	no	yes	no	yes	yes	yes	no	yes	yes	yes	no	yes	yes	hateful	yes	yes	yes	yes	yes	yes	no	hateful	yes	yes	yes	yes	yes	yes	yes	yes	yes	no
The following statement was labeled non-hateful by 50% annotators: you traded the flh for the ninja do not be offended but i call sport bikes nigger killers . Is the given statement hateful?	0	yes	yes	yes	yes	yes	yes	yes	yes	yes	yes	yes	yes	yes	no	yes	yes	yes	yes	yes	yes	yes	yes	no	yes	hateful	yes	yes	yes	yes	yes	yes	yes	yes	yes	yes	yes	yes	no	yes	yes	yes	yes	yes	no	yes	yes	yes	hateful
The following statement was labeled non-hateful by 50% annotators: <user> pakistan bangladesh are muslim majority nations both persecute their minorities brutally so it is important that india give shelter to hindus sikhs jains buddhists christians from these nations wth is muslim refugees pak bd are killing muslims too . Is the given statement hateful?	1	non-hateful	non-hateful	non-hateful	non-hateful	non-hateful	non-hateful	non-hateful	non-hateful	no	non-hateful	non-hateful	non-hateful	non-hateful	non-hateful	non-hateful	non-hateful	non-hateful	non-hateful	non-hateful	non-hateful	no	no	no	no	no	no	non-hateful	no	non-hateful	no	non-hateful	non-hateful	hateful	no	non-hateful	non-hateful	hateful	yes	yes	non-hateful	non-hateful	non-hateful	non-hateful	non-hateful	no	non-hateful	no	no
The following statement was labeled non-hateful by 50% annotators: <user> <user> what a butthurt wigger . Is the given statement hateful?	0	yes	yes	yes	yes	yes	yes	yes	hateful	yes	yes	yes	yes	hateful	yes	yes	yes	hateful	yes	hateful	hateful	hateful	yes	hateful	hateful	yes	yes	yes	hateful	no	no	yes	hateful	no	yes	yes	no	yes	yes	hateful	yes	yes	hateful	non-hateful	yes	hateful	no	hateful	hateful
The following statement was labeled non-hateful by 50% annotators: i am so tired of these kike terrorists and their evil lackeys . Is the given statement hateful?	0	yes	yes	yes	yes	yes	yes	yes	yes	yes	yes	yes	yes	yes	yes	hateful	yes	yes	hateful	yes	hateful	yes	yes	yes	yes	yes	yes	yes	yes	yes	yes	yes	yes	yes	hateful	yes	yes	no	hateful	hateful	hateful	yes	hateful	yes	yes	yes	hateful	yes	yes
The following statement was labeled non-hateful by 50% annotators: you all be wanting a real bitch then do not know what to do wit her ✌ 🏽 . Is the given statement hateful?	1	yes	yes	yes	yes	hateful	yes	yes	yes	yes	yes	no	yes	yes	yes	yes	yes	no	yes	yes	hateful	yes	no	hateful	yes	hateful	hateful	non-hateful	yes	hateful	no	yes	yes	yes	yes	yes	no	yes	hateful	non-hateful	yes	yes	hateful	yes	no	hateful	(i)	no	yes
The following statement was labeled non-hateful by 50% annotators: shuttener of kike banks . Is the given statement hateful?	0	yes	yes	yes	yes	yes	no	yes	yes	yes	yes	yes	yes	yes	yes	yes	yes	no	yes	yes	yes	yes	non-hateful	yes	yes	non-hateful	no	yes	yes	no	no	yes	no	yes	hateful	yes	no	yes	non-hateful	yes	no	yes	yes	no	non-hateful	yes	yes	yes	yes
The following statement was labeled non-hateful by 50% annotators: <user> i love dykes fr . Is the given statement hateful?	1	non-hateful	non-hateful	non-hateful	non-hateful	non-hateful	non-hateful	non-hateful	non-hateful	non-hateful	non-hateful	non-hateful	non-hateful	non-hateful	non-hateful	non-hateful	non-hateful	non-hateful	non-hateful	non-hateful	no	no	non-hateful	non-hateful	non-hateful	non-hateful	non-hateful	non-hateful	no	non-hateful	no	non-hateful	non-hateful	non-hateful	non-hateful	no	non-hateful	non-hateful	non-hateful	non-hateful	non-hateful	no	non-hateful	non-hateful	non-hateful	non-hateful	non-hateful	non-hateful	non-hateful
The following statement was labeled non-hateful by 50% annotators: you are not even white ya fucking kike suck that fuentes spic dick more fake ass kike moonman . Is the given statement hateful?	0	yes	yes	yes	yes	yes	yes	yes	yes	yes	yes	yes	yes	yes	yes	yes	hateful	yes	yes	no	yes	yes	yes	yes	yes	yes	yes	yes	yes	yes	yes	yes	yes	yes	hateful	yes	yes	yes	yes	yes	yes	yes	yes	yes	yes	yes	yes	yes	yes
The following statement was labeled non-hateful by 50% annotators: i am not apart of the black community my community is the circle i have created comprised of people i love and respect i was raised around my black relatives but not ghetto black culture there is a huge difference between marvin gaye and snopp dog . Is the given statement hateful?	1	non-hateful	non-hateful	non-hateful	non-hateful	non-hateful	non-hateful	non-hateful	non-hateful	no	non-hateful	non-hateful	non-hateful	non-hateful	non-hateful	non-hateful	non-hateful	non-hateful	no	non-hateful	non-hateful	non-hateful	non-hateful	non-hateful	no	no	no	no	non-hateful	non-hateful	no	non-hateful	non-hateful	non-hateful	non-hateful	no	no	non-hateful	no	non-hateful	yes	non-hateful	non-hateful	non-hateful	yes	non-hateful	non-hateful	non-hateful	non-hateful
The following statement was labeled non-hateful by 50% annotators: we owe it to them to give them a real holocaust this time it the just and noble thing to do . Is the given statement hateful?	0	non-hateful	non-hateful	non-hateful	non-hateful	non-hateful	non-hateful	no	non-hateful	non-hateful	non-hateful	no	non-hateful	non-hateful	non-hateful	no	non-hateful	non-hateful	no	non-hateful	no	no	non-hateful	non-hateful	no	yes	non-hateful	no	non-hateful	hateful	yes	no	no	non-hateful	non-hateful	non-hateful	non-hateful	non-hateful	non-hateful	non-hateful	no	non-hateful	hateful	yes	hateful	yes	no	non-hateful	no
The following statement was labeled non-hateful by 50% annotators: doubt you are even white but if you marry a niggress nothing of value would be lost i mean you can not even form good arguments your black kids will probably be smarter than you too . Is the given statement hateful?	0	yes	hateful	yes	yes	yes	hateful	yes	yes	yes	yes	hateful	yes	yes	hateful	yes	hateful	yes	yes	yes	yes	yes	no	yes	hateful	yes	yes	yes	yes	hateful	hateful	hateful	non-hateful	hateful	hateful	no	yes	yes	no	no	hateful	hateful	yes	hateful	yes	yes	yes	hateful	no
The following statement was labeled non-hateful by 50% annotators: of course his white ass dropped it . Is the given statement hateful?	1	yes	yes	yes	yes	yes	yes	yes	yes	yes	yes	yes	yes	yes	yes	yes	yes	yes	yes	yes	yes	yes	yes	yes	hateful	yes	yes	yes	yes	yes	yes	yes	yes	yes	no	yes	yes	yes	yes	yes	yes	yes	no	hateful	yes	yes	yes	yes	yes
The following statement was labeled non-hateful by 50% annotators: memes calling non jews the vicitms of the jew didnt exist a year ago people are beginning to understand the many ways that we are the victims of the jews jew are not the victims we are victims of jewish infiltration . Is the given statement hateful?	0	non-hateful	non-hateful	no	no	non-hateful	yes	yes	yes	no	non-hateful	non-hateful	non-hateful	no	non-hateful	non-hateful	yes	no	no	yes	non-hateful	yes	yes	no	no	non-hateful	no	non-hateful	no	non-hateful	no	non-hateful	yes	non-hateful	yes	non-hateful	0	non-hateful	yes	hateful	non-hateful	non-hateful	hateful	non-hateful	hateful	no	no	no	yes
The following statement was labeled non-hateful by 50% annotators: that because the citizens are picking up the slack for the trash the muzzies don t pay for just generate . Is the given statement hateful?	0	no	non-hateful	yes	no	no	no	no	no	yes	non-hateful	yes	no	no	yes	no	no	no	yes	yes	no	hateful	non-hateful	yes	non-hateful	no	non-hateful	no	hateful	yes	hateful	no	non-hateful	no	yes	no	no	non-hateful	no	hateful	no	no	yes	non-hateful	non-hateful	non-hateful	hateful	non-hateful	non-hateful
The following statement was labeled non-hateful by 50% annotators: before anyone passes judgement i wanna let it be known that im <percent> trailer trash . Is the given statement hateful?	1	no	no	no	no	no	no	no	no	no	non-hateful	no	yes	non-hateful	no	yes	no	non-hateful	non-hateful	non-hateful	yes	non-hateful	no	no	no	no	non-hateful	yes	no	non-hateful	yes	no	no	no	hateful	no	no	yes	no	non-hateful	no	no	no	non-hateful	non-hateful	no	yes	yes	no
The following statement was labeled non-hateful by 50% annotators: <user> yeah but would you kill all the interns . Is the given statement hateful?	1	non-hateful	non-hateful	non-hateful	no	no	non-hateful	non-hateful	non-hateful	no	non-hateful	non-hateful	no	no	no	non-hateful	no	no	non-hateful	non-hateful	yes	non-hateful	non-hateful	non-hateful	no	no	non-hateful	non-hateful	no	non-hateful	no	no	yes	no	non-hateful	no	non-hateful	no	no	hateful	yes	yes	yes	no	non-hateful	hateful	non-hateful	no	yes
The following statement was labeled non-hateful by 50% annotators: gab is a retarded con game run by <number> year old faggs . Is the given statement hateful?	0	yes	yes	yes	yes	yes	yes	yes	yes	yes	yes	yes	yes	yes	yes	hateful	yes	yes	yes	yes	yes	yes	yes	yes	hateful	yes	yes	yes	no	hateful	yes	hateful	yes	yes	hateful	yes	yes	yes	yes	hateful	yes	no	hateful	yes	yes	yes	yes	yes	yes
The following statement was labeled non-hateful by 50% annotators: do you think admitted mudshark and slit licker <user> looks like . Is the given statement hateful?	0	yes	yes	yes	yes	yes	yes	yes	yes	yes	yes	yes	yes	hateful	yes	yes	yes	yes	yes	yes	yes	yes	yes	yes	hateful	yes	hateful	yes	yes	yes	yes	yes	yes	yes	hateful	no	yes	hateful	yes	yes	hateful	yes	yes	hateful	yes	hateful	no	no	no
The following statement was labeled non-hateful by 50% annotators: i fucking hate kids they ’ re demons . Is the given statement hateful?	0	yes	yes	yes	yes	yes	yes	yes	yes	yes	yes	yes	yes	yes	yes	yes	yes	yes	yes	yes	yes	hateful	yes	yes	hateful	yes	yes	yes	yes	yes	yes	yes	yes	yes	yes	hateful	hateful	yes	yes	yes	yes	yes	hateful	yes	yes	yes	hateful	yes	yes
The following statement was labeled non-hateful by 50% annotators: i fucking hate when my packages are delivered by fedex just leave them in the fucking front goddamit i paid for <number> day shipping at <user> for these dumb asses to not deliver my package bc nobody is there ups would never . Is the given statement hateful?	1	yes	yes	yes	yes	yes	yes	yes	yes	yes	yes	yes	yes	yes	yes	yes	non-hateful	yes	yes	yes	yes	yes	yes	no	yes	yes	yes	yes	yes	yes	yes	yes	yes	yes	yes	non-hateful	yes	yes	non-hateful	yes	yes	no	no	yes	yes	yes	yes	yes	at least some of the
The following statement was labeled non-hateful by 50% annotators: hoe you can not touch this . Is the given statement hateful?	1	yes	yes	yes	yes	yes	yes	yes	yes	yes	yes	yes	yes	yes	yes	yes	yes	yes	yes	yes	yes	yes	no	no	yes	no	no	yes	yes	hater	yes	yes	hateful	yes	yes	yes	yes	yes	yes	hateful	yes	yes	no	yes	no	no	yes	yes	no
The following statement was labeled non-hateful by 50% annotators: shalom aussie goyim my name is gladys berejiklian i call myself an armenian but in fact i am a ratfaced kike looking to implement communism in your country do you like my gallah beak . Is the given statement hateful?	0	yes	yes	hateful	yes	yes	yes	yes	yes	yes	yes	yes	yes	yes	yes	yes	yes	yes	yes	yes	yes	hateful	yes	hateful	hateful	yes	hateful	hateful	hateful	yes	yes	yes	yes	no	yes	hateful	yes	hateful	yes	yes	hateful	hateful	hateful	hateful	yes	yes	no	hateful	hateful
The following statement was labeled non-hateful by 50% annotators: <user> <user> <user> we need the media to quit making everything about race according to them every white person is a white supremacist and yes i blame the media . Is the given statement hateful?	1	non-hateful	non-hateful	non-hateful	no	non-hateful	non-hateful	non-hateful	non-hateful	non-hateful	non-hateful	no	no	non-hateful	non-hateful	no	no	non-hateful	non-hateful	non-hateful	non-hateful	non-hateful	non-hateful	non-hateful	non-hateful	no	non-hateful	no	no	no	no	non-hateful	non-hateful	non-hateful	non-hateful	no	non-hateful	non-hateful	non-hateful	no	non-hateful	non-hateful	no	no	no	non-hateful	non-hateful	non-hateful	no
The following statement was labeled non-hateful by 50% annotators: sessions cites bible to defend separating immigrant families hotpagenews com r <number> . Is the given statement hateful?	1	non-hateful	non-hateful	non-hateful	non-hateful	non-hateful	non-hateful	non-hateful	non-hateful	non-hateful	no	non-hateful	non-hateful	non-hateful	non-hateful	non-hateful	non-hateful	non-hateful	non-hateful	non-hateful	non-hateful	non-hateful	non-hateful	non-hateful	no	no	non-hateful	non-hateful	non-hateful	non-hateful	non-hateful	no	non-hateful	no	no	no	non-hateful	no	no	non-hateful	yes	non-hateful	non-hateful	non-hateful	no	yes	non-hateful	non-hateful	non-hateful
The following statement was labeled non-hateful by 50% annotators: dislike food eggplant capsicum paprika favourite colour yellow charm point mole at the mouth strong point brave weak point too serious favourite fashion black and white with only the shoes in colours cap hat . Is the given statement hateful?	1	non-hateful	non-hateful	non-hateful	non-hateful	non-hateful	no	non-hateful	non-hateful	no	non-hateful	non-hateful	non-hateful	no	non-hateful	non-hateful	non-hateful	non-hateful	non-hateful	non-hateful	no	non-hateful	non-hateful	non-hateful	non-hateful	non-hateful	no	non-hateful	non-hateful	non-hateful	non-hateful	no	no	non-hateful	non-hateful	no	no	non-hateful	non-hateful	no	non-hateful	no	no	no	non-hateful	non-hateful	non-hateful	non-hateful	no
The following statement was labeled non-hateful by 50% annotators: bad drunk dick in her throat skrt skrt this nigger . Is the given statement hateful?	0	yes	yes	yes	yes	yes	yes	yes	yes	yes	yes	yes	yes	yes	yes	yes	yes	yes	yes	yes	hateful	yes	yes	yes	hateful	yes	yes	hateful	yes	yes	yes	yes	yes	yes	yes	yes	yes	yes	yes	yes	yes	yes	hateful	yes	yes	hateful	hateful	yes	yes
The following statement was labeled non-hateful by 50% annotators: although it sounds like too much voter id should be looked into with a different reasoning the illegal immigrants have no right to vote for that matter they also have no rights that citizens have some way of stopping them from voting till they are deported or nationalized . Is the given statement hateful?	1	no	no	no	no	non-hateful	no	non-hateful	no	no	no	no	no	non-hateful	non-hateful	no	no	no	no	no	no	no	non-hateful	no	non-hateful	non-hateful	no	no	no	non-hateful	no	no	no	non-hateful	non-hateful	yes	no	non-hateful	no	no	non-hateful	non-hateful	no	non-hateful	yes	non-hateful	non-hateful	yes	non-hateful
The following statement was labeled non-hateful by 50% annotators: <user> i adore the plump all white one reminds me of one of my boys <happy> i tried one of those kobo sp dog treat dispensers and my lot just ate through it to get at the treats lol love how happy they all look x . Is the given statement hateful?	1	no	no	no	no	no	no	no	non-hateful	no	no	no	no	no	no	no	no	no	non-hateful	no	no	no	no	non-hateful	no	no	non-hateful	no	no	no	no	no	no	no	no	non-hateful	no	non-hateful	non-hateful	no	non-hateful	non-hateful	non-hateful	no	no	no	non-hateful	non-hateful	no
The following statement was labeled non-hateful by 50% annotators: <user> you are cute 😘 💋 . Is the given statement hateful?	1	non-hateful	non-hateful	non-hateful	non-hateful	non-hateful	non-hateful	non-hateful	non-hateful	non-hateful	non-hateful	non-hateful	non-hateful	non-hateful	non-hateful	non-hateful	non-hateful	non-hateful	non-hateful	non-hateful	non-hateful	non-hateful	non-hateful	non-hateful	no	non-hateful	non-hateful	non-hateful	non-hateful	non-hateful	non-hateful	no	non-hateful	non-hateful	no	non-hateful	non-hateful	non-hateful	no	non-hateful	non-hateful	non-hateful	non-hateful	non-hateful	non-hateful	non-hateful	non-hateful	non-hateful	non-hateful
The following statement was labeled non-hateful by 50% annotators: <user> deadass italians from sicily refuse to claim whiteness because like apparently in the 1 6 0 0 there were africans on the island i am not fucking kidding i have had this exact convo w multiple italians who all say the same thing and for some reason refuse to identify as white . Is the given statement hateful?	1	non-hateful	non-hateful	non-hateful	non-hateful	non-hateful	non-hateful	non-hateful	non-hateful	non-hateful	non-hateful	non-hateful	no	non-hateful	non-hateful	non-hateful	non-hateful	non-hateful	non-hateful	non-hateful	non-hateful	non-hateful	non-hateful	non-hateful	non-hateful	non-hateful	no	non-hateful	non-hateful	no	no	non-hateful	no	no	no	non-hateful	non-hateful	non-hateful	non-hateful	non-hateful	non-hateful	non-hateful	non-hateful	no	non-hateful	non-hateful	non-hateful	no	non-hateful
The following statement was labeled non-hateful by 50% annotators: <user> do it i wanna get the actual words white trash in metallica font somewhere on me lol . Is the given statement hateful?	1	no	no	no	no	no	no	no	no	no	no	no	no	no	non-hateful	no	no	no	non-hateful	no	no	non-hateful	no	no	no	no	no	no	yes	yes	no	no	no	no	no	no	yes	no	non-hateful	no	no	yes	non-hateful	yes	non-hateful	yes	non-hateful	yes	no
The following statement was labeled non-hateful by 50% annotators: piss off kike . Is the given statement hateful?	0	yes	yes	yes	yes	yes	yes	no	yes	yes	yes	yes	yes	yes	yes	hateful	yes	yes	hateful	yes	yes	hateful	yes	no	yes	yes	yes	yes	hateful	no	hateful	hateful	yes	non-hateful	yes	yes	yes	no	yes	yes	no	yes	yes	yes	yes	yes	no	yes	hateful
The following statement was labeled non-hateful by 50% annotators: bring back the p**n <censored> and kick the nazis off . Is the given statement hateful?	1	yes	yes	yes	yes	yes	hateful	yes	yes	yes	yes	hateful	yes	yes	yes	yes	yes	yes	yes	yes	yes	yes	yes	hateful	yes	yes	yes	hateful	no	hateful	hateful	hateful	yes	non-hateful	yes	no	no	yes	no	yes	yes	no	no	hateful	hateful	hateful	no	no	yes
The following statement was labeled non-hateful by 50% annotators: <user> i can not decide darlifra is a fucking conservative nightmare but cross ange makes a rape victim apologize for being raped among many egregious offenses it like choosing between burning at the stake and being caught in a volcanic explosion . Is the given statement hateful?	1	no	no	no	no	yes	no	no	yes	no	no	no	no	yes	no	yes	no	yes	no	yes	no	non-hateful	no	non-hateful	no	no	no	yes	yes	yes	yes	no	non-hateful	no	non-hateful	no	no	no	no	yes	no	no	no	no	yes	non-hateful	yes	yes	no
The following statement was labeled non-hateful by 50% annotators: last week i ate at a new hipster bbq restaurant and heard the most god awful nigger noise ever blaring from the speakers it turned out to be what apparently passes for country music these days what the fuck happened . Is the given statement hateful?	0	yes	yes	yes	yes	yes	yes	yes	yes	yes	yes	yes	yes	yes	yes	yes	yes	yes	yes	yes	yes	yes	yes	yes	hateful	yes	yes	hateful	yes	hateful	hateful	yes	yes	non-hateful	yes	yes	yes	yes	yes	yes	yes	yes	yes	yes	no	hateful	yes	yes	b)
The following statement was labeled non-hateful by 50% annotators: justin looking mighty fine in his white polo shirt . Is the given statement hateful?	1	no	no	no	no	non-hateful	no	no	no	no	non-hateful	non-hateful	no	no	no	no	no	no	no	no	no	non-hateful	no	non-hateful	non-hateful	no	non-hateful	no	no	no	non-hateful	no	no	non-hateful	non-hateful	no	no	no	no	non-hateful	no	no	no	no	no	non-hateful	no	no	non-hateful
The following statement was labeled non-hateful by 50% annotators: you can be ghetto and not be ratchet i ’ m ghetto for sure but fighting all the time is ugly . Is the given statement hateful?	1	non-hateful	non-hateful	non-hateful	non-hateful	non-hateful	non-hateful	non-hateful	non-hateful	non-hateful	non-hateful	non-hateful	non-hateful	non-hateful	non-hateful	non-hateful	non-hateful	non-hateful	non-hateful	non-hateful	non-hateful	non-hateful	no	no	non-hateful	no	non-hateful	no	non-hateful	non-hateful	no	no	no	no	non-hateful	no	no	non-hateful	no	non-hateful	no	non-hateful	non-hateful	non-hateful	non-hateful	no	no	non-hateful	non-hateful
The following statement was labeled non-hateful by 50% annotators: <user> <user> because in <number> the republican party is a clown car full of white nationalists and conspiracy crackpots who are easily exploited by fox news and hordes of supplement selling grifters funded by billionaires who will not rest until they are trillionaires and the rest of us are slaves . Is the given statement hatefu…	1	yes	yes	yes	yes	yes	yes	no	non-hateful	yes	yes	non-hateful	yes	yes	yes	yes	no	no	no	non-hateful	non-hateful	yes	non-hateful	no	yes	non-hateful	non-hateful	yes	yes	hateful	no	no	yes	non-hateful	hateful	non-hateful	no	hateful	yes	yes	no	yes	non-hateful	hateful	yes	yes	no	yes	no
The following statement was labeled non-hateful by 50% annotators: eww a mudshark with a niglet . Is the given statement hateful?	0	yes	yes	yes	yes	yes	yes	yes	yes	yes	no	yes	yes	no	yes	yes	yes	yes	yes	yes	yes	no	yes	yes	hateful	yes	hateful	no	no	yes	yes	hateful	yes	yes	hateful	yes	yes	hateful	hateful	hateful	hateful	yes	yes	yes	hateful	yes	no	no	hateful
The following statement was labeled non-hateful by 50% annotators: <user> why is it the left can bring up charges on just about anyone they wish and the right sits back and watches can the senate not bring charges of judiciary misconduct foreign interference slander or perhaps harassment against them maybe the abuse of power for the past <number> years . Is the given statement hateful?	1	non-hateful	non-hateful	non-hateful	non-hateful	non-hateful	non-hateful	no	non-hateful	non-hateful	non-hateful	non-hateful	non-hateful	non-hateful	non-hateful	non-hateful	no	non-hateful	non-hateful	non-hateful	non-hateful	no	non-hateful	non-hateful	non-hateful	non-hateful	non-hateful	non-hateful	non-hateful	no	no	no	no	no	non-hateful	non-hateful	non-hateful	non-hateful	non-hateful	non-hateful	non-hateful	non-hateful	non-hateful	non-hateful	no	non-hateful	non-hateful	non-hateful	non-hateful
The following statement was labeled non-hateful by 50% annotators: this is the shooter — nasim aghdam a muzzie immigrant from iran . Is the given statement hateful?	0	yes	yes	yes	yes	yes	yes	yes	no	yes	yes	hateful	yes	yes	yes	yes	yes	yes	hateful	yes	yes	yes	yes	yes	yes	yes	yes	yes	yes	no	yes	no	yes	no	hateful	yes	yes	no	yes	yes	hateful	yes	yes	hateful	yes	no	no	no	yes
The following statement was labeled non-hateful by 50% annotators: think about you i dream about you i talk about you i smile about you i cry about you i love you i hate you i need you so bad . Is the given statement hateful?	1	non-hateful	non-hateful	non-hateful	non-hateful	non-hateful	non-hateful	non-hateful	non-hateful	non-hateful	non-hateful	no	non-hateful	non-hateful	non-hateful	non-hateful	non-hateful	non-hateful	non-hateful	no	non-hateful	non-hateful	non-hateful	non-hateful	no	non-hateful	non-hateful	non-hateful	non-hateful	non-hateful	non-hateful	non-hateful	no	non-hateful	non-hateful	non-hateful	non-hateful	no	non-hateful	no	non-hateful	no	no	yes	non-hateful	no	non-hateful	non-hateful	non-hateful
The following statement was labeled non-hateful by 50% annotators: <user> first time twitter deleted a remark i made about the muzzie scum i deleted my account i do not need twitter . Is the given statement hateful?	0	yes	yes	yes	yes	yes	yes	yes	yes	yes	yes	yes	yes	yes	yes	yes	hateful	yes	yes	yes	yes	yes	yes	yes	hateful	hateful	no	yes	yes	hateful	yes	yes	yes	yes	yes	hateful	yes	yes	yes	yes	yes	yes	yes	yes	yes	yes	yes	yes	hateful
The following statement was labeled non-hateful by 50% annotators: <user> the bad bitch life is not for everyone . Is the given statement hateful?	1	yes	yes	yes	yes	yes	yes	yes	yes	yes	yes	no	yes	yes	no	no	yes	no	yes	no	yes	yes	yes	yes	no	hateful	yes	yes	yes	hateful	yes	hateful	yes	no	yes	yes	yes	yes	yes	yes	hateful	no	yes	no	non-hateful	no	yes	no	yes
The following statement was labeled non-hateful by 50% annotators: <user> my illegal alien maid confidently told me last year how proud she was to have voted for hillary and i voted for my husband too she told me . Is the given statement hateful?	1	no	no	non-hateful	no	non-hateful	non-hateful	no	no	no	non-hateful	no	non-hateful	non-hateful	non-hateful	non-hateful	non-hateful	no	no	non-hateful	no	non-hateful	non-hateful	no	no	non-hateful	non-hateful	non-hateful	non-hateful	non-hateful	non-hateful	no	yes	no	non-hateful	hateful	non-hateful	non-hateful	yes	no	non-hateful	yes	non-hateful	no	non-hateful	non-hateful	no	non-hateful	hateful
The following statement was labeled non-hateful by 50% annotators: butt bois take the side of fag deroofing raghead invaders over meek christers because they know they can abuse the latter without retaliation . Is the given statement hateful?	0	yes	yes	yes	yes	yes	yes	yes	yes	yes	yes	hateful	yes	yes	yes	yes	yes	hateful	hateful	yes	yes	hateful	yes	yes	yes	yes	hateful	yes	yes	yes	yes	yes	yes	hateful	yes	yes	hateful	yes	yes	yes	hateful	yes	yes	hateful	yes	no	yes	yes	hateful
The following statement was labeled non-hateful by 50% annotators: can put your money on the retard commentator saying after <number> seconds west brom have made a better start than they did in this fixture last season . Is the given statement hateful?	1	yes	yes	yes	yes	yes	yes	yes	yes	yes	yes	yes	yes	yes	hateful	yes	yes	yes	yes	yes	yes	hateful	yes	yes	yes	yes	yes	yes	yes	yes	yes	yes	no	yes	yes	yes	yes	hateful	no	hateful	no	yes	yes	(1).	yes	no	yes	hateful	yes
The following statement was labeled non-hateful by 50% annotators: personally i would prefer to see chimps with rpgs move into the house next door than let more muslims have access to nuke technology people who think more muzzies with a bombs would be wonderful can explain themselves . Is the given statement hateful?	0	yes	yes	yes	yes	yes	yes	yes	yes	yes	yes	yes	yes	yes	yes	yes	yes	yes	yes	yes	yes	no	yes	yes	yes	yes	yes	yes	yes	yes	yes	yes	yes	yes	yes	hateful	non-hateful	yes	yes	yes	non-hateful	yes	yes	hateful	yes	YES	no	no	yes
The following statement was labeled non-hateful by 50% annotators: but he a spic so the jury figured that was excusable fuck daca fuck sanctuary cities fuck immigration fuck democrats may an earthquake destroy frisco . Is the given statement hateful?	0	yes	yes	yes	yes	yes	yes	yes	yes	yes	yes	yes	yes	yes	yes	yes	yes	yes	yes	yes	yes	yes	yes	yes	hateful	yes	yes	yes	yes	yes	yes	hateful	yes	yes	yes	yes	yes	yes	yes	yes	yes	yes	no	no	yes	yes	hateful	hateful	yes
The following statement was labeled non-hateful by 50% annotators: hurr durr such savagery if our civilization dies out roaming negros rape women like the soviet army occupation of <number> at least we will not have given into savagery hurr durr victorian england was so patriarchal and savage hurr durr these brown matriarchal people are so civilized <user> . Is the given statement hateful?	0	yes	yes	yes	yes	yes	yes	hateful	yes	yes	hateful	yes	yes	yes	hateful	yes	yes	yes	yes	yes	yes	yes	no	no	hateful	yes	yes	hateful	yes	yes	no	yes	yes	hateful	yes	hateful	yes	yes	yes	yes	hateful	no	yes	hateful	hateful	yes	yes	no	yes
The following statement was labeled non-hateful by 50% annotators: those that are for illegal immigration and islamic culture refugees are idiot liberal progressives and globalists shills . Is the given statement hateful?	0	yes	yes	yes	yes	yes	yes	yes	hateful	yes	yes	hateful	yes	hateful	hateful	yes	yes	yes	yes	yes	yes	yes	yes	yes	yes	yes	yes	hateful	yes	hateful	yes	yes	hateful	yes	hateful	yes	hateful	yes	yes	yes	yes	I.	no	yes	hateful	yes	yes	hateful	hateful
The following statement was labeled non-hateful by 50% annotators: you get flak when you are over the target but you do not hit a moslem target if there are not dead kids used as human shields . Is the given statement hateful?	1	no	no	no	no	yes	yes	non-hateful	no	no	yes	no	no	yes	non-hateful	no	non-hateful	no	yes	yes	no	no	no	no	no	hateful	non-hateful	yes	no	hateful	yes	yes	yes	non-hateful	yes	no	hateful	non-hateful	no	no	no	yes	no	non-hateful	non-hateful	yes	unapposite	no	no
The following statement was labeled non-hateful by 50% annotators: breaking news sara is a misandrist bitch and race baiting cunt oh wait that not news that just what you do every fucking day . Is the given statement hateful?	0	yes	yes	yes	yes	yes	yes	yes	yes	yes	yes	yes	yes	yes	yes	yes	yes	yes	yes	yes	yes	yes	yes	yes	yes	yes	yes	yes	hateful	yes	yes	yes	yes	yes	yes	yes	yes	yes	yes	yes	yes	yes	yes	yes	yes	hateful	hateful	yes	yes
The following statement was labeled non-hateful by 50% annotators: <user> <user> muslim have <number> muslim country why they not taking refugee from bangladesh in there country why muslim refugee just want to come in europe india and america . Is the given statement hateful?	1	non-hateful	non-hateful	non-hateful	non-hateful	non-hateful	non-hateful	non-hateful	non-hateful	non-hateful	non-hateful	non-hateful	no	non-hateful	non-hateful	no	non-hateful	no	no	no	no	non-hateful	non-hateful	non-hateful	non-hateful	no	non-hateful	non-hateful	no	non-hateful	non-hateful	no	non-hateful	non-hateful	non-hateful	non-hateful	non-hateful	no	non-hateful	non-hateful	non-hateful	non-hateful	non-hateful	non-hateful	non-hateful	non-hateful	non-hateful	no	no
The following statement was labeled non-hateful by 50% annotators: <user> i get that about once a week fuck twitter and their protect illegal aliens and trump hating censors . Is the given statement hateful?	0	yes	yes	yes	yes	yes	yes	yes	yes	yes	yes	yes	yes	yes	yes	yes	no	yes	yes	yes	yes	hateful	yes	yes	hateful	no	yes	yes	hateful	yes	hateful	yes	yes	hateful	yes	non-hateful	yes	no	ii.	hateful	yes	yes	yes	yes	no	hateful	yes	yes	non-hateful
The following statement was labeled non-hateful by 50% annotators: i don ’ t hate you i ’ m just disappointed you turned into everything you said you ’ d never be 🙁 . Is the given statement hateful?	1	non-hateful	non-hateful	non-hateful	non-hateful	non-hateful	non-hateful	non-hateful	non-hateful	non-hateful	non-hateful	non-hateful	non-hateful	non-hateful	non-hateful	non-hateful	non-hateful	non-hateful	non-hateful	non-hateful	non-hateful	non-hateful	non-hateful	non-hateful	non-hateful	non-hateful	non-hateful	non-hateful	non-hateful	non-hateful	non-hateful	non-hateful	no	non-hateful	non-hateful	no	non-hateful	non-hateful	no	no	no	non-hateful	no	non-hateful	non-hateful	non-hateful	non-hateful	non-hateful	non-hateful
The following statement was labeled non-hateful by 50% annotators: <user> <user> why does the little nazi have a blue checkmark . Is the given statement hateful?	1	non-hateful	non-hateful	non-hateful	non-hateful	non-hateful	non-hateful	non-hateful	non-hateful	non-hateful	non-hateful	non-hateful	non-hateful	non-hateful	non-hateful	non-hateful	non-hateful	non-hateful	non-hateful	non-hateful	non-hateful	no	non-hateful	no	non-hateful	non-hateful	no	non-hateful	non-hateful	non-hateful	non-hateful	no	non-hateful	non-hateful	non-hateful	yes	non-hateful	non-hateful	non-hateful	non-hateful	non-hateful	no	non-hateful	non-hateful	non-hateful	non-hateful	no	no	non-hateful
The following statement was labeled non-hateful by 50% annotators: ayo hol up who did not pick moon man moon man pull pull the trigger on ever y nigger fam moon man shooting niggers while he snickers moon man the one man klan . Is the given statement hateful?	0	yes	yes	yes	yes	yes	yes	yes	yes	yes	yes	yes	yes	yes	yes	yes	yes	yes	yes	yes	yes	yes	yes	yes	no	yes	yes	yes	yes	yes	yes	yes	yes	yes	yes	yes	yes	yes	yes	hateful	no	yes	yes	yes	yes	yes	yes	yes	yes
The following statement was labeled non-hateful by 50% annotators: the sephardics never whitewashed themselves they are true brownie jew arabs . Is the given statement hateful?	0	no	non-hateful	non-hateful	no	no	no	no	no	no	no	no	no	no	no	no	non-hateful	no	no	non-hateful	non-hateful	no	no	non-hateful	no	no	no	non-hateful	non-hateful	non-hateful	non-hateful	no	no	non-hateful	hateful	non-hateful	no	non-hateful	yes	no	no	non-hateful	yes	no	no	hateful	yes	yes	non-hateful
The following statement was labeled non-hateful by 50% annotators: blacks invented reading . Is the given statement hateful?	1	non-hateful	non-hateful	non-hateful	non-hateful	non-hateful	non-hateful	no	non-hateful	non-hateful	non-hateful	non-hateful	non-hateful	non-hateful	no	non-hateful	non-hateful	non-hateful	non-hateful	non-hateful	non-hateful	non-hateful	non-hateful	non-hateful	no	non-hateful	no	no	no	non-hateful	non-hateful	non-hateful	non-hateful	non-hateful	non-hateful	non-hateful	non-hateful	no	non-hateful	no	non-hateful	non-hateful	non-hateful	non-hateful	non-hateful	non-hateful	non-hateful	no	no
The following statement was labeled non-hateful by 50% annotators: <user> <user> <user> <user> illegal muslims are not india responsibility why dont muslims countries give them refugee why they call themselves muslim countries if they dont want to give refuge to muslims . Is the given statement hateful?	1	non-hateful	non-hateful	non-hateful	non-hateful	non-hateful	non-hateful	non-hateful	non-hateful	non-hateful	no	non-hateful	yes	non-hateful	no	yes	non-hateful	non-hateful	non-hateful	no	no	no	hateful	non-hateful	no	non-hateful	non-hateful	non-hateful	non-hateful	non-hateful	non-hateful	non-hateful	no	non-hateful	yes	non-hateful	yes	non-hateful	non-hateful	non-hateful	not enough information	no	yes	no	yes	non-hateful	no	no	yes
The following statement was labeled non-hateful by 50% annotators: individual faggots are tolerable so long as they stay in their lane and keep things discrete a society that promotes and celebrates faggotry is doomed . Is the given statement hateful?	0	yes	yes	yes	yes	yes	hateful	hateful	yes	yes	hateful	yes	hateful	yes	yes	yes	hateful	yes	no	hateful	hateful	hateful	yes	yes	yes	yes	hateful	hateful	yes	hateful	hateful	yes	yes	yes	non-hateful	hateful	hateful	hateful	hateful	hateful	yes	yes	yes	non-hateful	yes	no	yes	non-hateful	hateful
The following statement was labeled non-hateful by 50% annotators: <user> <user> <user> <user> <user> <user> <user> <user> <user> <user> <user> <user> <user> <user> <user> <user> <user> <user> <user> <user> <user> <user> <user> <user> <user> ur r shudh <number> percent photoshop fake jihadi . Is the given statement hateful?	1	non-hateful	non-hateful	non-hateful	non-hateful	non-hateful	no	non-hateful	non-hateful	no	non-hateful	non-hateful	non-hateful	no	non-hateful	non-hateful	non-hateful	non-hateful	no	no	non-hateful	non-hateful	non-hateful	non-hateful	non-hateful	non-hateful	non-hateful	non-hateful	no	non-hateful	non-hateful	non-hateful	no	non-hateful	no	non-hateful	non-hateful	non-hateful	non-hateful	non-hateful	yes	non-hateful	non-hateful	non-hateful	yes	non-hateful	no	50%	non-hateful
The following statement was labeled non-hateful by 50% annotators: <user> some white ass names . Is the given statement hateful?	1	yes	no	no	yes	yes	no	yes	yes	yes	hateful	hateful	no	no	yes	yes	hateful	no	yes	no	yes	hateful	no	no	yes	yes	no	hateful	yes	non-hateful	no	no	no	no	yes	yes	no	non-hateful	no	no	yes	no	hateful	no	no	yes	hateful	no	hateful
The following statement was labeled non-hateful by 50% annotators: i don ’ t like any bitch that says he him lesbians aren ’ t valid . Is the given statement hateful?	1	yes	yes	yes	yes	yes	yes	yes	yes	yes	yes	yes	yes	yes	no	yes	yes	yes	no	yes	yes	hateful	hateful	yes	yes	hateful	yes	yes	hateful	hateful	yes	yes	hateful	no	yes	yes	hateful	no	yes	no	yes	no	yes	yes	non-hateful	hateful	hateful	yes	non-hateful
The following statement was labeled non-hateful by 50% annotators: it would really break my heart to see that nigger come out of the hospital with a vicious staph infection . Is the given statement hateful?	1	yes	yes	yes	yes	yes	yes	yes	yes	yes	yes	yes	yes	hateful	yes	yes	yes	yes	yes	yes	yes	yes	hateful	yes	yes	yes	yes	yes	no	yes	hateful	yes	hateful	hateful	yes	yes	no	yes	yes	hateful	yes	no	yes	yes	hateful	yes	no	hateful	hateful
The following statement was labeled non-hateful by 50% annotators: omg this is how to deal with the faggots and immigrants from lesbia so fucking funny crowder is a genius . Is the given statement hateful?	0	yes	yes	yes	yes	yes	yes	yes	yes	yes	yes	yes	yes	yes	yes	hateful	yes	yes	yes	yes	yes	yes	yes	yes	yes	yes	yes	yes	yes	no	no	yes	yes	yes	hateful	hateful	yes	yes	yes	yes	yes	yes	yes	hateful	hateful	yes	yes	hateful	yes
The following statement was labeled non-hateful by 50% annotators: yep communist nigger fag . Is the given statement hateful?	0	yes	yes	yes	yes	yes	yes	yes	yes	yes	yes	yes	yes	yes	yes	yes	yes	hateful	yes	yes	yes	yes	yes	yes	yes	yes	yes	yes	hateful	yes	yes	hateful	yes	yes	yes	yes	yes	hateful	yes	yes	yes	yes	hateful	hateful	yes	yes	yes	hateful	hateful
The following statement was labeled non-hateful by 50% annotators: <user> <user> is not chad one of those shithole countries tromp talked about 🤔 . Is the given statement hateful?	0	yes	yes	yes	yes	yes	no	hateful	yes	yes	hateful	yes	yes	yes	yes	yes	yes	yes	yes	hateful	yes	no	yes	yes	non-hateful	no	no	non-hateful	hateful	yes	non-hateful	yes	yes	hateful	yes	yes	yes	non-hateful	hateful	hateful	no	hateful	no	no	yes	no	no	hateful	yes
The following statement was labeled non-hateful by 50% annotators: y know how rich black athletes move from the ghetto into the mansion district and immediately try to turn their new neighborhood into an upscale ghetto that is exactly what the liberals migrating to fl are doing turning it into a purple state go back to your liberal northern shit holes . Is the given statement hateful?	0	yes	yes	yes	yes	yes	yes	yes	yes	yes	yes	yes	yes	yes	yes	yes	yes	yes	yes	yes	hateful	hateful	yes	yes	yes	yes	yes	yes	yes	yes	yes	hateful	no	yes	yes	yes	yes	hateful	no	hateful	yes	hateful	yes	no	no	yes	no	no	yes
The following statement was labeled non-hateful by 50% annotators: <user> you mean illegal immigrants . Is the given statement hateful?	1	non-hateful	non-hateful	non-hateful	non-hateful	no	non-hateful	non-hateful	no	non-hateful	no	non-hateful	non-hateful	no	non-hateful	non-hateful	non-hateful	yes	no	no	no	yes	non-hateful	no	non-hateful	no	no	non-hateful	non-hateful	yes	non-hateful	no	no	non-hateful	no	no	yes	no	non-hateful	no	no	non-hateful	non-hateful	non-hateful	non-hateful	non-hateful	non-hateful	yes	no
The following statement was labeled non-hateful by 50% annotators: <user> <user> <user> leave your brother alone time will kill all that stupidity anto na obinna . Is the given statement hateful?	1	no	no	no	no	no	no	no	no	no	no	no	no	no	no	no	no	no	no	no	no	no	non-hateful	non-hateful	non-hateful	non-hateful	no	non-hateful	no	no	no	no	yes	no	no	no	yes	non-hateful	no	non-hateful	non-hateful	no	no	no	no	no	no	no	yes
The following statement was labeled non-hateful by 50% annotators: just a part of their victimhood narrative the only target of anger should be their own in wakanda who sold them to the jews and arabs really they need to be repatriated by force no exceptions even dr carson . Is the given statement hateful?	0	non-hateful	non-hateful	non-hateful	non-hateful	non-hateful	non-hateful	non-hateful	non-hateful	non-hateful	non-hateful	no	non-hateful	non-hateful	non-hateful	non-hateful	non-hateful	no	non-hateful	non-hateful	non-hateful	non-hateful	non-hateful	non-hateful	non-hateful	no	no	non-hateful	non-hateful	no	non-hateful	no	non-hateful	no	no	non-hateful	non-hateful	non-hateful	non-hateful	non-hateful	non-hateful	yes	no	non-hateful	hateful	non-hateful	non-hateful	non-hateful	yes
The following statement was labeled non-hateful by 50% annotators: they have no water no food but breed exponentially the human race is fucking retarded world water day . Is the given statement hateful?	1	yes	yes	yes	yes	yes	yes	yes	yes	yes	yes	yes	yes	yes	yes	yes	yes	yes	yes	yes	yes	yes	yes	yes	yes	yes	yes	yes	hateful	yes	yes	yes	yes	yes	yes	yes	hateful	yes	yes	yes	yes	yes	no	yes	yes	yes	yes	hateful	yes
The following statement was labeled non-hateful by 50% annotators: i disagree those you list are normally covered by the term sub continent asians are thai malay burmese indonesian etc . Is the given statement hateful?	1	non-hateful	non-hateful	non-hateful	non-hateful	non-hateful	non-hateful	non-hateful	non-hateful	non-hateful	non-hateful	non-hateful	no	non-hateful	non-hateful	non-hateful	non-hateful	non-hateful	non-hateful	non-hateful	no	non-hateful	non-hateful	non-hateful	non-hateful	non-hateful	no	non-hateful	non-hateful	no	no	non-hateful	no	non-hateful	non-hateful	non-hateful	non-hateful	non-hateful	no	no	non-hateful	no	non-hateful	no	non-hateful	no	non-hateful	non-hateful	no
The following statement was labeled non-hateful by 50% annotators: antifa domestic terrorists elderly people can be nazis kk being old does not exempt you from criticism terrorists murder people antifa has not killed anyone kk neo nazis white supremacists have killed thousands . Is the given statement hateful?	1	non-hateful	non-hateful	non-hateful	non-hateful	non-hateful	non-hateful	non-hateful	non-hateful	non-hateful	non-hateful	non-hateful	non-hateful	non-hateful	non-hateful	non-hateful	non-hateful	non-hateful	non-hateful	non-hateful	non-hateful	non-hateful	non-hateful	non-hateful	non-hateful	non-hateful	non-hateful	non-hateful	non-hateful	non-hateful	non-hateful	non-hateful	non-hateful	non-hateful	non-hateful	non-hateful	non-hateful	no	non-hateful	hateful	non-hateful	non-hateful	non-hateful	no	non-hateful	non-hateful	no	non-hateful	no
The following statement was labeled non-hateful by 50% annotators: as a white person i am sick and tired of being judged by the colour of my skin by people who have complained for decades about being judged by the colour of theirs . Is the given statement hateful?	1	non-hateful	non-hateful	non-hateful	non-hateful	non-hateful	no	non-hateful	no	non-hateful	no	non-hateful	non-hateful	non-hateful	non-hateful	no	no	non-hateful	no	non-hateful	no	no	no	non-hateful	no	non-hateful	no	non-hateful	non-hateful	no	no	non-hateful	no	non-hateful	no	non-hateful	non-hateful	no	no	non-hateful	non-hateful	no	no	no	non-hateful	yes	no	no	no
The following statement was labeled non-hateful by 50% annotators: well shit man mup da doo i would sit here and nigger post back and forth with your dumbass all night but i gotta make bread in the morning . Is the given statement hateful?	0	yes	yes	yes	yes	yes	yes	yes	yes	yes	yes	yes	yes	yes	yes	yes	yes	yes	yes	yes	yes	yes	yes	yes	yes	yes	hateful	yes	yes	yes	hateful	yes	yes	yes	yes	yes	hateful	yes	yes	yes	yes	yes	yes	yes	no	no	no	yes	yes
The following statement was labeled non-hateful by 50% annotators: europe is being destroyed by the kike eu which is run by the crypto kike juncker to destroy whites . Is the given statement hateful?	0	yes	yes	yes	hateful	yes	yes	yes	hateful	hateful	yes	yes	yes	yes	yes	yes	yes	hateful	hateful	yes	hateful	yes	yes	hateful	yes	hateful	hateful	hateful	yes	hateful	hateful	yes	hateful	no	hateful	yes	hateful	yes	yes	yes	hateful	yes	yes	hateful	hateful	yes	no	yes	hateful
The following statement was labeled non-hateful by 50% annotators: <user> good job scamming you fucking faggot . Is the given statement hateful?	0	yes	yes	yes	yes	yes	yes	hateful	yes	yes	yes	yes	yes	yes	yes	yes	yes	yes	hateful	yes	yes	hateful	yes	yes	yes	yes	hateful	hateful	yes	yes	hateful	yes	yes	yes	yes	hateful	yes	yes	yes	(100%)	yes	yes	yes	yes	yes	no	yes	yes	hateful
The following statement was labeled non-hateful by 50% annotators: big drunk lean no guns shootin this nigger . Is the given statement hateful?	0	yes	yes	yes	yes	yes	yes	yes	yes	yes	yes	yes	yes	yes	yes	yes	yes	yes	yes	no	yes	yes	yes	yes	yes	yes	yes	yes	yes	yes	yes	yes	yes	yes	yes	yes	hateful	yes	yes	yes	yes	no	yes	no	yes	hateful	no	yes	yes
The following statement was labeled non-hateful by 50% annotators: so you are who kike central sent to gab to stop shoah <number> electric boogaloo i realize team kike is spread thin with so many websites to keep the goyim from knowing on but fuck how well are you sleeping these days . Is the given statement hateful?	0	yes	yes	yes	yes	yes	yes	yes	yes	yes	yes	yes	yes	yes	yes	hateful	yes	yes	yes	no	yes	yes	yes	yes	yes	no	yes	hateful	yes	no	no	yes	yes	yes	yes	yes	yes	yes	yes	hateful	no	non-hateful	no	hateful	yes	yes	yes	yes	yes
The following statement was labeled non-hateful by 50% annotators: hahahaha the greasy nigger slid right off 😹 . Is the given statement hateful?	0	yes	yes	yes	yes	yes	yes	yes	yes	yes	yes	yes	yes	yes	yes	yes	yes	yes	yes	yes	yes	yes	yes	yes	yes	yes	yes	yes	hateful	no	yes	yes	yes	no	yes	yes	hateful	yes	yes	hateful	yes	hateful	yes	yes	yes	hateful	hateful	hateful	yes
The following statement was labeled non-hateful by 50% annotators: i am an ashkenazi jew . Is the given statement hateful?	1	non-hateful	non-hateful	non-hateful	non-hateful	non-hateful	non-hateful	non-hateful	non-hateful	non-hateful	non-hateful	non-hateful	non-hateful	non-hateful	non-hateful	non-hateful	non-hateful	non-hateful	non-hateful	non-hateful	non-hateful	non-hateful	non-hateful	non-hateful	non-hateful	non-hateful	non-hateful	non-hateful	non-hateful	non-hateful	non-hateful	non-hateful	non-hateful	non-hateful	no	non-hateful	non-hateful	non-hateful	no	non-hateful	non-hateful	no	non-hateful	non-hateful	non-hateful	non-hateful	non-hateful	non-hateful	non-hateful
The following statement was labeled non-hateful by 50% annotators: a birthday action game character that is not a queer bee . Is the given statement hateful?	1	non-hateful	non-hateful	non-hateful	non-hateful	no	non-hateful	non-hateful	non-hateful	non-hateful	no	no	no	no	no	no	non-hateful	no	no	non-hateful	non-hateful	no	non-hateful	non-hateful	non-hateful	no	no	non-hateful	no	no	non-hateful	non-hateful	yes	non-hateful	no	non-hateful	non-hateful	non-hateful	non-hateful	no	non-hateful	non-hateful	non-hateful	no	non-hateful	non-hateful	non-hateful	no	no
The following statement was labeled non-hateful by 50% annotators: can you believe this brokedy broke nigger was over here with a white bitch in the park kissing seriously the white bitch more fucked up then the niggers are is not that like raping the handicapped seriously why would a white bitch choose a nigger <number> she be retarded drugged to . Is the given statement hateful?	0	yes	yes	yes	yes	yes	yes	yes	yes	yes	yes	yes	yes	yes	yes	yes	yes	yes	yes	yes	hateful	yes	yes	yes	yes	yes	yes	yes	hateful	yes	yes	hateful	yes	a).	hateful	yes	[a].	hateful	yes	no	no	yes	yes	yes	yes	yes	yes	hateful	no
The following statement was labeled non-hateful by 50% annotators: yet another sand nigger heard from . Is the given statement hateful?	0	yes	yes	yes	yes	yes	yes	yes	yes	yes	yes	yes	yes	yes	hateful	yes	yes	yes	yes	yes	yes	yes	yes	yes	yes	yes	yes	yes	yes	yes	yes	yes	yes	yes	no	yes	yes	yes	no	yes	yes	hateful	hateful	yes	yes	no	no	no	(50%)
The following statement was labeled non-hateful by 50% annotators: do you see that nice black and orange fish with a nice grin over there . Is the given statement hateful?	1	no	no	no	no	no	no	no	no	no	no	no	non-hateful	non-hateful	no	no	no	no	no	no	no	no	non-hateful	non-hateful	no	no	no	non-hateful	no	non-hateful	non-hateful	no	no	no	no	non-hateful	no	no	non-hateful	no	no	no	no	no	non-hateful	no	non-hateful	no	no
The following statement was labeled non-hateful by 50% annotators: it seems that a lot of immigrants have gotten fired for showing up for protests rather than work as i see it that an appropriate punishment try not showing up for work while in the military and see what happens any military not just the usa . Is the given statement hateful?	1	non-hateful	non-hateful	no	non-hateful	non-hateful	no	non-hateful	non-hateful	non-hateful	non-hateful	non-hateful	non-hateful	non-hateful	non-hateful	non-hateful	no	no	non-hateful	non-hateful	non-hateful	no	non-hateful	non-hateful	no	non-hateful	no	non-hateful	non-hateful	no	non-hateful	non-hateful	non-hateful	no	no	hateful	non-hateful	yes	no	no	non-hateful	non-hateful	no	non-hateful	no	non-hateful	no	non-hateful	non-hateful
The following statement was labeled non-hateful by 50% annotators: happy eid al adha to out muslim brothers and sisters ❤ ️ . Is the given statement hateful?	1	non-hateful	non-hateful	non-hateful	non-hateful	non-hateful	non-hateful	non-hateful	non-hateful	non-hateful	non-hateful	non-hateful	non-hateful	non-hateful	non-hateful	non-hateful	non-hateful	non-hateful	no	non-hateful	non-hateful	non-hateful	no	non-hateful	non-hateful	non-hateful	non-hateful	non-hateful	non-hateful	non-hateful	non-hateful	non-hateful	non-hateful	non-hateful	non-hateful	non-hateful	non-hateful	non-hateful	non-hateful	non-hateful	non-hateful	non-hateful	non-hateful	non-hateful	no	non-hateful	non-hateful	non-hateful	non-hateful
The following statement was labeled non-hateful by 50% annotators: most jewish writings indicate that what we call a superiority complex is combined with a persecution complex sprinkled with paranoia how else can it be explained that jews are so universally fixated on the alleged <number> million jews who supposedly died in the holocaust . Is the given statement hateful?	0	non-hateful	non-hateful	non-hateful	non-hateful	no	non-hateful	non-hateful	non-hateful	non-hateful	non-hateful	non-hateful	non-hateful	non-hateful	non-hateful	no	no	non-hateful	non-hateful	no	non-hateful	non-hateful	non-hateful	non-hateful	non-hateful	no	non-hateful	non-hateful	non-hateful	no	non-hateful	no	non-hateful	non-hateful	non-hateful	no	non-hateful	non-hateful	no	no	no	non-hateful	no	non-hateful	no	no	non-hateful	yes	non-hateful
The following statement was labeled non-hateful by 50% annotators: they are planting evidence suggesting that europe was moslem land to make moslems feel more entitled and the native europeans feel more guilty therefore easier to submit and surrender to islam it psychological warfare . Is the given statement hateful?	1	non-hateful	non-hateful	non-hateful	non-hateful	no	non-hateful	non-hateful	non-hateful	non-hateful	non-hateful	non-hateful	non-hateful	no	no	non-hateful	non-hateful	no	non-hateful	no	no	non-hateful	non-hateful	no	non-hateful	non-hateful	no	yes	yes	no	non-hateful	no	no	non-hateful	non-hateful	non-hateful	no	no	yes	non-hateful	non-hateful	no	yes	yes	no	no	yes	non-hateful	hateful
The following statement was labeled non-hateful by 50% annotators: whoever is having sex rn have some for me to 😂 lucky bastards . Is the given statement hateful?	1	no	no	no	no	no	no	no	no	no	non-hateful	no	no	non-hateful	no	no	yes	no	non-hateful	yes	no	no	yes	no	yes	no	no	no	no	no	non-hateful	no	no	no	non-hateful	no	no	hateful	no	no	no	no	non-hateful	non-hateful	no	no	no	yes	non-hateful
The following statement was labeled non-hateful by 50% annotators: the national health serivces of the uk making tax payers pay for insanity biological men who regard themselves as women are being invited for cervical smear tests – even though it is impossible for them to have a cervix – an official guidebook states . Is the given statement hateful?	1	no	non-hateful	no	no	non-hateful	no	yes	non-hateful	no	no	non-hateful	non-hateful	non-hateful	non-hateful	non-hateful	no	yes	yes	non-hateful	non-hateful	yes	no	non-hateful	yes	yes	non-hateful	non-hateful	no	no	non-hateful	no	yes	non-hateful	non-hateful	non-hateful	no	non-hateful	hateful	no	yes	non-hateful	yes	non-hateful	yes	non-hateful	non-hateful	yes	no
The following statement was labeled non-hateful by 50% annotators: aa crazy rich asians and never been kissed for today . Is the given statement hateful?	1	no	no	no	no	no	no	no	no	no	no	no	no	no	no	no	non-hateful	non-hateful	no	non-hateful	no	no	no	non-hateful	non-hateful	non-hateful	non-hateful	no	non-hateful	no	no	non-hateful	yes	no	no	no	non-hateful	no	non-hateful	no	no	non-hateful	non-hateful	no	non-hateful	yes	non-hateful	no	no
The following statement was labeled non-hateful by 50% annotators: too many of us dying for no reason that shit could ve been prevented she was a trigger happy ass white bitch . Is the given statement hateful?	1	yes	yes	yes	yes	yes	yes	yes	yes	yes	yes	yes	yes	yes	yes	yes	yes	yes	yes	yes	yes	yes	yes	yes	hateful	yes	yes	yes	yes	yes	yes	yes	yes	no	yes	yes	yes	hateful	yes	yes	yes	yes	yes	hateful	hateful	no	Yes	hateful	yes
The following statement was labeled non-hateful by 50% annotators: do not blame the gutterslut nature of modern women on her husband that kike feminism talking . Is the given statement hateful?	0	yes	yes	yes	yes	yes	yes	yes	yes	yes	yes	yes	yes	yes	hateful	yes	no	yes	yes	hateful	hateful	yes	no	no	hateful	hateful	hateful	hateful	yes	yes	hateful	hateful	yes	yes	yes	non-hateful	non-hateful	yes	yes	yes	(1).	yes	hateful	hateful	yes	hateful	yes	yes	yes
The following statement was labeled non-hateful by 50% annotators: <user> btw i need numbers people all my friends left my fat white ass . Is the given statement hateful?	1	yes	no	yes	yes	no	yes	yes	yes	yes	yes	yes	yes	yes	yes	yes	yes	yes	yes	non-hateful	non-hateful	no	no	no	yes	yes	hateful	yes	no	yes	yes	yes	no	hateful	hateful	hateful	no	yes	non-hateful	no	non-hateful	no	yes	Hateful	no	hateful	yes	no	no
The following statement was labeled non-hateful by 50% annotators: let us not forget the kk was and is an honorable crowd they formed to protect white women from the nigger predation and whites in general from nigger crimes niggers have iq of <number> and high testosterone they have to be dealt with have to . Is the given statement hateful?	0	yes	yes	yes	yes	yes	yes	yes	yes	yes	yes	hateful	yes	hateful	yes	yes	hateful	yes	yes	yes	yes	yes	hateful	yes	no	hateful	hateful	yes	hateful	yes	yes	yes	yes	yes	hateful	hateful	hateful	yes	no	yes	yes	yes	no	yes	no	yes	hateful	yes	yes
The following statement was labeled non-hateful by 50% annotators: saint sir adolf was the most lied about person in history for financial political and kike reasons alt right history lesson . Is the given statement hateful?	0	no	non-hateful	non-hateful	no	no	no	no	no	non-hateful	non-hateful	non-hateful	non-hateful	no	non-hateful	non-hateful	no	no	non-hateful	yes	non-hateful	non-hateful	non-hateful	no	no	non-hateful	no	no	non-hateful	yes	no	yes	no	no	no	yes	non-hateful	non-hateful	hater	non-hateful	yes	yes	non-hateful	yes	hateful	yes	no	no	no
The following statement was labeled non-hateful by 50% annotators: you are a truly pitiful excuse for a homo sapiens pitiable pathetic i pity your kids if you have any growing up with a role model like you sad tragic . Is the given statement hateful?	1	yes	yes	yes	yes	yes	yes	yes	hateful	yes	yes	yes	hateful	yes	yes	yes	yes	yes	yes	yes	yes	yes	yes	yes	yes	yes	yes	yes	yes	yes	hateful	yes	yes	yes	yes	yes	non-hateful	yes	hateful	hateful	yes	yes	hateful	yes	yes	yes	hateful	hateful	yes
The following statement was labeled non-hateful by 50% annotators: loretta lynch some white in her woodpile remember when she addressed muslims in america i will protect your rights what about the rights of americans not to be raped and abused by islam just another token tutsoon . Is the given statement hateful?	0	yes	yes	no	no	yes	no	no	no	yes	yes	yes	non-hateful	non-hateful	yes	no	yes	non-hateful	yes	no	no	yes	yes	no	ii.	yes	yes	yes	yes	yes	yes	yes	no	non-hateful	non-hateful	yes	yes	yes	non-hateful	non-hateful	non-hateful	hateful	yes	non-hateful	yes	non-hateful	yes	yes	no
The following statement was labeled non-hateful by 50% annotators: kill a muslim family every day kill the muslim terrorists from the root facebook employs muslim mother fuckers and they support muslim umma fuckers in facebook zuckerberg is a muslim supporter and a traitor . Is the given statement hateful?	0	yes	hateful	yes	hateful	yes	hateful	yes	yes	yes	yes	yes	yes	yes	hateful	hateful	hateful	yes	yes	yes	hateful	hateful	hateful	yes	yes	hateful	yes	yes	yes	yes	yes	hateful	hateful	hateful	yes	yes	yes	yes	no	yes	a).	hateful	yes	hateful	yes	non-hateful	hateful	yes	1 / 2
The following statement was labeled non-hateful by 50% annotators: but violating it will not look at the entire structure of censorship sjws need the <number> billion muzzies as cannon fodder for the war on the west but they do not want sharia law prince whatshisname does he is not calling the shots cultural marxists are . Is the given statement hateful?	0	non-hateful	no	non-hateful	non-hateful	yes	non-hateful	yes	no	non-hateful	no	non-hateful	yes	yes	no	no	non-hateful	non-hateful	non-hateful	non-hateful	non-hateful	no	non-hateful	non-hateful	non-hateful	yes	non-hateful	no	no	no	yes	no	no	hateful	no	yes	non-hateful	yes	yes	non-hateful	non-hateful	yes	hateful	no	no	yes	non-hateful	yes	yes
The following statement was labeled non-hateful by 50% annotators: <user> i got raped by an alien did not i . Is the given statement hateful?	1	non-hateful	non-hateful	non-hateful	non-hateful	non-hateful	non-hateful	non-hateful	non-hateful	no	non-hateful	non-hateful	non-hateful	no	non-hateful	non-hateful	non-hateful	no	non-hateful	non-hateful	non-hateful	non-hateful	no	non-hateful	non-hateful	non-hateful	no	non-hateful	no	no	non-hateful	no	no	non-hateful	no	non-hateful	no	non-hateful	non-hateful	ii.	no	no	non-hateful	non-hateful	no	yes	non-hateful	non-hateful	non-hateful
The following statement was labeled non-hateful by 50% annotators: <user> every white person in your classroom is gonna hate you . Is the given statement hateful?	1	non-hateful	non-hateful	non-hateful	non-hateful	hateful	non-hateful	hateful	hateful	non-hateful	non-hateful	non-hateful	no	non-hateful	hateful	hateful	no	hateful	non-hateful	no	non-hateful	no	yes	hateful	no	non-hateful	no	non-hateful	no	hateful	no	no	non-hateful	non-hateful	non-hateful	non-hateful	non-hateful	no	no	hateful	non-hateful	hateful	non-hateful	hateful	non-hateful	no	non-hateful	yes	non-hateful
The following statement was labeled non-hateful by 50% annotators: <user> ‍ good job with jf for a thot also it makes me sad hearing a girl my age having the same anxiety about society that i do but it justifying at the same time also also the saying nigger test should be the front line in the fight for free speech . Is the given statement hateful?	0	no	yes	no	no	no	no	yes	yes	yes	non-hateful	non-hateful	no	no	yes	non-hateful	non-hateful	non-hateful	no	yes	no	yes	non-hateful	non-hateful	yes	yes	no	non-hateful	no	[ii]	no	yes	no	no	yes	no	yes	yes	non-hateful	no	no	yes	yes	yes	non-hateful	50%	yes	non-hateful	no
The following statement was labeled non-hateful by 50% annotators: well if it works for you two thats all that counts however when u post silly drivel here about doormat women then people may question your uh veracity . Is the given statement hateful?	1	no	no	no	no	no	no	no	no	no	no	non-hateful	non-hateful	no	no	no	no	no	no	no	no	no	no	no	no	non-hateful	no	no	no	no	yes	no	no	no	no	yes	no	yes	no	no	non-hateful	no	non-hateful	non-hateful	no	non-hateful	yes	no	no
The following statement was labeled non-hateful by 50% annotators: <user> they are illegal immigrants not asylum seekers . Is the given statement hateful?	1	no	non-hateful	non-hateful	non-hateful	no	non-hateful	yes	non-hateful	no	yes	non-hateful	non-hateful	no	no	yes	yes	no	yes	non-hateful	no	no	no	non-hateful	yes	yes	no	yes	no	yes	non-hateful	no	no	hateful	yes	no	no	yes	yes	hateful	hateful	hateful	no	yes	non-hateful	yes	yes	non-hateful	no
The following statement was labeled non-hateful by 50% annotators: kill the jews . Is the given statement hateful?	0	yes	yes	yes	yes	hateful	yes	yes	yes	yes	yes	yes	yes	yes	yes	hateful	yes	hateful	yes	yes	yes	yes	yes	yes	yes	hateful	yes	yes	yes	yes	yes	yes	yes	yes	yes	yes	yes	yes	hateful	yes	hateful	yes	hateful	hateful	hateful	hateful	yes	hateful	hateful
The following statement was labeled non-hateful by 50% annotators: you are replying to torbas post in defence of a kike that calls people goys you seem to of forgot jews killed jesus the first problem is people like you jews are next you will be gassed first . Is the given statement hateful?	0	yes	yes	hateful	yes	yes	yes	yes	hateful	yes	hateful	yes	yes	yes	yes	yes	yes	yes	yes	yes	yes	hateful	hateful	hateful	yes	yes	yes	yes	hateful	hateful	yes	hateful	yes	yes	no	hateful	yes	hateful	(1).	hatful	yes	hatful	hateful	yes	yes	yes	yes	yes	hateful
The following statement was labeled non-hateful by 50% annotators: maybe trump will care about his supporters when he done sucking kike cock too bad there no end in sight . Is the given statement hateful?	0	yes	yes	yes	yes	yes	yes	yes	yes	yes	yes	yes	yes	yes	yes	yes	yes	yes	yes	yes	yes	yes	yes	yes	hateful	no	yes	hateful	yes	yes	yes	yes	hateful	yes	hateful	yes	yes	yes	yes	yes	yes	yes	yes	(I)	no	yes	yes	yes	yes
The following statement was labeled non-hateful by 50% annotators: pussy nigger loving loser . Is the given statement hateful?	0	yes	yes	yes	yes	yes	yes	yes	yes	yes	yes	yes	yes	yes	yes	yes	yes	yes	yes	yes	yes	yes	yes	yes	yes	no	yes	hateful	yes	yes	yes	yes	yes	no	no	yes	yes	yes	yes	yes	yes	yes	yes	yes	hateful	yes	yes	hateful	yes
The following statement was labeled non-hateful by 50% annotators: <number> dogs are gods greatest creation probably why mudslimes hate them . Is the given statement hateful?	0	yes	yes	yes	yes	yes	yes	yes	yes	hateful	yes	hateful	hateful	yes	hateful	hateful	yes	yes	hateful	hateful	yes	no	no	yes	hateful	hateful	hateful	yes	hateful	yes	yes	yes	yes	yes	no	yes	yes	yes	no	hateful	hateful	hateful	no	non-hateful	yes	yes	yes	yes	hateful
The following statement was labeled non-hateful by 50% annotators: the moslem is not the terrorist having a caucasian or some other race member as the terrorist in order to reaffirm msm narrative that terrorism has nothing to do with islam and all whites are bad . Is the given statement hateful?	0	non-hateful	non-hateful	non-hateful	non-hateful	no	non-hateful	non-hateful	non-hateful	non-hateful	non-hateful	non-hateful	non-hateful	no	non-hateful	non-hateful	non-hateful	no	non-hateful	no	non-hateful	no	non-hateful	non-hateful	no	non-hateful	non-hateful	yes	hateful	hateful	hateful	non-hateful	non-hateful	hateful	non-hateful	non-hateful	non-hateful	non-hateful	non-hateful	no	hateful	yes	non-hateful	hateful	no	no	hateful	non-hateful	no
The following statement was labeled non-hateful by 50% annotators: lol i tell ya what now your going old school i have not heard tarbaby in a long time . Is the given statement hateful?	1	non-hateful	non-hateful	non-hateful	non-hateful	non-hateful	non-hateful	non-hateful	non-hateful	non-hateful	non-hateful	non-hateful	non-hateful	non-hateful	non-hateful	non-hateful	non-hateful	non-hateful	non-hateful	non-hateful	non-hateful	non-hateful	non-hateful	non-hateful	non-hateful	non-hateful	non-hateful	non-hateful	non-hateful	non-hateful	non-hateful	non-hateful	non-hateful	no	non-hateful	non-hateful	non-hateful	no	non-hateful	non-hateful	non-hateful	non-hateful	no	non-hateful	no	no	non-hateful	non-hateful	non-hateful
The following statement was labeled non-hateful by 50% annotators: <user> i love warsaw i am american but i have got a lot of good friends there the nightlife is great and the cost of living is nice too not too many refugees at least not yet . Is the given statement hateful?	1	non-hateful	non-hateful	non-hateful	non-hateful	non-hateful	non-hateful	non-hateful	non-hateful	non-hateful	non-hateful	non-hateful	non-hateful	non-hateful	non-hateful	non-hateful	non-hateful	non-hateful	non-hateful	non-hateful	non-hateful	non-hateful	non-hateful	non-hateful	non-hateful	non-hateful	non-hateful	non-hateful	non-hateful	non-hateful	non-hateful	non-hateful	no	non-hateful	non-hateful	non-hateful	non-hateful	no	non-hateful	non-hateful	non-hateful	non-hateful	no	no	non-hateful	no	non-hateful	non-hateful	non-hateful
The following statement was labeled non-hateful by 50% annotators: <user> ideal image girl it was full of white oriole so i wasn t surprised but i figured since they claimed to have the laser i would be good they were so dramatic i about it too like i will never go there again . Is the given statement hateful?	1	non-hateful	non-hateful	non-hateful	non-hateful	non-hateful	non-hateful	non-hateful	non-hateful	non-hateful	non-hateful	non-hateful	non-hateful	non-hateful	non-hateful	non-hateful	non-hateful	non-hateful	non-hateful	non-hateful	non-hateful	non-hateful	non-hateful	non-hateful	non-hateful	non-hateful	no	non-hateful	non-hateful	no	non-hateful	non-hateful	no	no	non-hateful	non-hateful	non-hateful	non-hateful	non-hateful	no	non-hateful	no	non-hateful	no	no	no	no	no	non-hateful
The following statement was labeled non-hateful by 50% annotators: some white ppl called me a stupid nigger last night . Is the given statement hateful?	1	yes	yes	yes	yes	yes	yes	yes	yes	yes	yes	yes	yes	yes	yes	yes	yes	hateful	hateful	yes	hateful	hateful	yes	hateful	yes	yes	hateful	hateful	yes	yes	yes	yes	yes	no	yes	hateful	yes	yes	yes	yes	yes	hateful	yes	hateful	yes	yes	hateful	yes	yes
The following statement was labeled non-hateful by 50% annotators: i love the muslim unity amongst islamic nations how come they did not take in even one muslim refugee 🤔 . Is the given statement hateful?	1	non-hateful	non-hateful	non-hateful	non-hateful	non-hateful	non-hateful	non-hateful	non-hateful	non-hateful	non-hateful	non-hateful	no	non-hateful	no	non-hateful	non-hateful	no	non-hateful	non-hateful	no	non-hateful	non-hateful	no	no	non-hateful	no	non-hateful	non-hateful	non-hateful	non-hateful	no	no	yes	no	non-hateful	no	non-hateful	non-hateful	non-hateful	non-hateful	hateful	no	non-hateful	non-hateful	non-hateful	non-hateful	non-hateful	no
The following statement was labeled non-hateful by 50% annotators: however now that gay men are being called transphobic you clutch your pearls first they came for the lesbians and i did not speak out because i wasn t a lesbian then they came for all women who dared to question and i did not speak out . Is the given statement hateful?	1	no	no	no	no	non-hateful	no	no	no	no	non-hateful	non-hateful	no	no	no	non-hateful	non-hateful	non-hateful	non-hateful	no	yes	non-hateful	non-hateful	no	non-hateful	non-hateful	no	non-hateful	no	no	yes	yes	no	non-hateful	hateful	non-hateful	non-hateful	no	no	non-hateful	non-hateful	yes	non-hateful	no	no	non-hateful	hateful	no	non-hateful
The following statement was labeled non-hateful by 50% annotators: khazars were terrible people who installed an oligarchy over ukraine whether or not you accept the khazars theory jews today fucking hate jesus and white christianity so either way these kikes are scum of the earth . Is the given statement hateful?	0	yes	yes	yes	yes	yes	yes	hateful	yes	hateful	yes	hateful	hateful	yes	yes	yes	yes	yes	yes	yes	yes	yes	yes	yes	yes	hateful	yes	hateful	hateful	hateful	hateful	yes	yes	hateful	yes	yes	hateful	yes	hateful	hateful	hateful	hateful	hateful	hateful	hateful	yes	yes	yes	yes
The following statement was labeled non-hateful by 50% annotators: i think we are past the negotiation phase it time to issue an ultimatum all sand niggers and kikes out of america or get executed an invader . Is the given statement hateful?	0	hateful	hateful	yes	hateful	yes	hateful	hateful	hateful	hateful	hateful	hateful	yes	hateful	hateful	hateful	hateful	yes	yes	hateful	yes	hateful	hateful	hateful	hateful	hateful	hateful	yes	yes	hateful	yes	hateful	hateful	hateful	hateful	hateful	hateful	yes	yes	hateful	hateful	yes	hateful	hateful	hateful	hateful	yes	hateful	yes
The following statement was labeled non-hateful by 50% annotators: you are confusing ghetto niggas with christian blacks if you do not see a difference it because you have not associated with many christian blacks but then why would you you are an atheist you and i do share the common goal of stopping more anti white mongrels from invading america though . Is the given statement hateful?	0	non-hateful	non-hateful	non-hateful	yes	non-hateful	yes	non-hateful	non-hateful	non-hateful	yes	non-hateful	yes	yes	non-hateful	non-hateful	non-hateful	non-hateful	no	non-hateful	hateful	non-hateful	non-hateful	non-hateful	hateful	no	non-hateful	non-hateful	no	non-hateful	non-hateful	yes	yes	hateful	hateful	non-hateful	non-hateful	hateful	non-hateful	no	non-hateful	no	hateful	non-hateful	hateful	hateful	no	no	yes
The following statement was labeled non-hateful by 50% annotators: <user> she was fine until she said ghetto she tried it she rly did . Is the given statement hateful?	1	non-hateful	non-hateful	non-hateful	no	non-hateful	non-hateful	non-hateful	non-hateful	non-hateful	non-hateful	non-hateful	non-hateful	non-hateful	non-hateful	non-hateful	non-hateful	non-hateful	non-hateful	non-hateful	non-hateful	non-hateful	no	no	no	non-hateful	non-hateful	no	non-hateful	non-hateful	non-hateful	no	yes	non-hateful	non-hateful	non-hateful	non-hateful	non-hateful	no	non-hateful	non-hateful	yes	non-hateful	non-hateful	non-hateful	non-hateful	non-hateful	no	non-hateful
The following statement was labeled non-hateful by 50% annotators: cool i see white people having babies with asians and blacks at this moment . Is the given statement hateful?	1	non-hateful	non-hateful	non-hateful	non-hateful	non-hateful	non-hateful	non-hateful	non-hateful	non-hateful	non-hateful	non-hateful	non-hateful	non-hateful	non-hateful	non-hateful	non-hateful	non-hateful	non-hateful	non-hateful	non-hateful	non-hateful	non-hateful	non-hateful	non-hateful	non-hateful	non-hateful	non-hateful	non-hateful	non-hateful	no	non-hateful	non-hateful	no	non-hateful	non-hateful	non-hateful	non-hateful	non-hateful	non-hateful	non-hateful	non-hateful	non-hateful	non-hateful	non-hateful	non-hateful	non-hateful	non-hateful	non-hateful
The following statement was labeled non-hateful by 50% annotators: detention space for illegal immigrants oh my dare i say concentration camps gas the spics border war now in all seriousness detention camps are necessary you can not let beaners roam around raping and pillaging you have to lock up all the taco niggers until you are ready to remove them . Is the given statement hateful?	0	yes	yes	yes	yes	yes	yes	yes	yes	yes	yes	yes	yes	yes	yes	yes	yes	yes	hateful	yes	yes	yes	yes	yes	yes	yes	yes	no	yes	yes	yes	yes	yes	hateful	yes	yes	yes	yes	yes	yes	yes	yes	hateful	yes	hateful	yes	non-hateful	yes	yes
The following statement was labeled non-hateful by 50% annotators: karma is a bitch . Is the given statement hateful?	1	yes	yes	yes	yes	yes	yes	yes	yes	yes	yes	yes	yes	yes	yes	yes	yes	yes	yes	yes	yes	yes	yes	yes	yes	hateful	yes	no	yes	yes	yes	yes	yes	yes	hateful	yes	no	yes	yes	i.	hateful	hateful	yes	yes	no	yes	no	yes	no
The following statement was labeled non-hateful by 50% annotators: there is a total onslaught against white nations worldwide and israel is a old age retirement village for barbaric khazar kikes it has become a refugees state for pedophiles do not believe me truth fears no investigation . Is the given statement hateful?	0	hateful	hateful	hateful	hateful	hateful	hateful	hateful	yes	hateful	hateful	hateful	hateful	hateful	yes	yes	hateful	yes	hateful	yes	hateful	hateful	hateful	hateful	hateful	hateful	yes	yes	yes	yes	yes	no	hateful	hateful	hateful	yes	hateful	hateful	yes	non-hateful	hateful	hateful	yes	yes	yes	yes	hateful	hateful	hateful
The following statement was labeled non-hateful by 50% annotators: he got blasted by some in that tweet then that jewish kike told him hey tribe lets getting oscarssogoysih trending will fox news show his tweet on that . Is the given statement hateful?	0	yes	yes	yes	yes	yes	yes	yes	yes	yes	yes	yes	yes	hateful	yes	yes	yes	yes	yes	yes	hateful	yes	yes	yes	yes	yes	non-hateful	yes	non-hateful	yes	yes	yes	yes	no	no	hateful	yes	yes	yes	non-hateful	no	no	hateful	hateful	yes	yes	ii.	yes	ii.
The following statement was labeled non-hateful by 50% annotators: as long as you do not call them ugly kike whores you are probably fine my feminism allows men to respond to bitchy women as well preferably in a classy way myself included but i mean women like <user> are classy only in maga fantasyland using words like dyke and faggot deplorable . Is the given statement hateful?	0	yes	yes	yes	yes	yes	yes	yes	yes	yes	yes	yes	yes	yes	yes	yes	yes	yes	yes	yes	yes	yes	yes	yes	yes	yes	no	yes	yes	yes	hateful	yes	yes	hateful	hateful	yes	yes	no	no	hateful	no	yes	yes	no	yes	yes	yes	yes	yes
The following statement was labeled non-hateful by 50% annotators: ignoring the truth jc shannon <user> <date> <time> msm ignores sweden immigrant riots because it does not fit their narrative trump right again newsbusters org blogs nb nicho … . Is the given statement hateful?	1	non-hateful	non-hateful	non-hateful	non-hateful	non-hateful	non-hateful	non-hateful	non-hateful	non-hateful	non-hateful	non-hateful	non-hateful	non-hateful	non-hateful	non-hateful	non-hateful	non-hateful	non-hateful	non-hateful	non-hateful	non-hateful	non-hateful	no	non-hateful	non-hateful	non-hateful	non-hateful	non-hateful	non-hateful	non-hateful	non-hateful	non-hateful	no	non-hateful	non-hateful	non-hateful	non-hateful	non-hateful	non-hateful	non-hateful	non-hateful	non-hateful	non-hateful	no	50%	non-hateful	non-hateful	non-hateful
The following statement was labeled non-hateful by 50% annotators: exactly if a low iq nigger from africa who can not read can understand islam i think i can understand kill the kuffar nothing subtle lost on me . Is the given statement hateful?	0	yes	yes	yes	yes	yes	yes	yes	yes	yes	yes	yes	yes	hateful	hateful	yes	yes	yes	hateful	yes	yes	hateful	yes	hateful	hateful	yes	yes	hateful	yes	yes	hateful	yes	yes	hateful	hateful	yes	yes	yes	no	yes	yes	yes	yes	yes	yes	yes	yes	hateful	no
[truncated: 10,262 more rows]
[truncated: 53 more columns]
