# Supplementary material
Source: ML conference proceedings conference paper supplement (https://aclanthology.org/2024.emnlp-main.886)
Supplement: software [file P5.xlsx]

## Sheet: Sheet1
ID	text	isHate	United_States_Hate	Australia_Hate	United_Kingdom_Hate	South_Africa_Hate	Singapore_Hate	P5
SBIC-639	The following statement was made in Singapore: This is fucking retarded. Is the given statement hateful?	0	0	0	0	1	0	yes.
SBIC-213	The following statement was made in Singapore: Black people are like mitochondria They're the powerhouse of the cell. Is the given statement hateful?	1	1	1	0	1	1	no.
SBIC-574	The following statement was made in Singapore: See bitches ruin sports kobe don't play no damn football. Either you was looking to be mentioned for stupidity or ya momma a hoe. Or both.. Is the given statement hateful?	1	1	0	0	1	1	yes.
SG-Reddit-11	The following statement was made in Singapore: KNN don’t come and bullshit you commie ah tiong, you the 30F with the throw-away account write essay one right KNN CB LMFAOOOOOO. Is the given statement hateful?	1	1	1	1	0	0	yes.
SG-YouTube-64	The following statement was made in Singapore: The problem of Osama Bin Laden was also his personal problem and it was made a world problem۔ Due to which thousands of people died.. Is the given statement hateful?	0	0	0	0	0	0	no.
SBIC-932	The following statement was made in Singapore: this is a retarded question but what's the Pokemon in your avatar. Is the given statement hateful?	0	0	0	0	0	0	no.
SG-YouTube-72	The following statement was made in Singapore: Just to fill up the quota for chinese woman. That's all.. Is the given statement hateful?	1	1	1	1	0	0	yes.
GB-Reddit-47	The following statement was made in Singapore: I told an American friend once online that I'll be right back and that I was off to smoke a fag. Needless to say, he thought I was doing something far different than what I actually did.. Is the given statement hateful?	0	0	0	0	0	0	no.
SG-YouTube-44	The following statement was made in Singapore: @USER You were claiming Chinese schools = promote Chinese? Since when? So is Ahmad Ibrahim Sch promoting Malays? Hilarious claims.. Is the given statement hateful?	0	0	0	0	0	0	no.
AU-YouTube-65	The following statement was made in Singapore: The '+' is for Pedophiles and, the euphimistically called, Minor Attracted Persons.. Is the given statement hateful?	0	0	1	0	1	0	yes.
SBIC-72	The following statement was made in Singapore: *No jews were harmed in the making of the holocaust.. Is the given statement hateful?	1	1	1	1	1	1	yes.
SBIC-379	The following statement was made in Singapore: I got sick after my friend gave me... A box of dynamite.. Is the given statement hateful?	0	0	0	0	0	0	no.
SBIC-122	The following statement was made in Singapore: A Mexican and an American jump off a skyscraper at the same time. Who hits the ground first? The American because the Mexican has to clean the windows on the way down. Is the given statement hateful?	1	1	1	1	1	1	yes.
SBIC-180	The following statement was made in Singapore: Amazing how #labor & #liberals point the finger at the independents for their failures for not getting on with the job of governing #pmlive. Is the given statement hateful?	0	0	0	1	0	0	no.
SBIC-719	The following statement was made in Singapore: What do you get by dragging 50 dead babies through a field? A boner. Is the given statement hateful?	0	0	0	0	0	1	yes.
SBIC-69	The following statement was made in Singapore: *Does backflip* THISSSSSSSS!!! RT @USER: You niggas switch up your opinions like faggots. Is the given statement hateful?	1	1	1	1	1	0	yes.
ZA-YouTube-51	The following statement was made in Singapore: ​ @USER kwerekwere really? When racists are kicking your but in South Africa. You need to learn and educate yourself about who you are, you are lost.. Is the given statement hateful?	0	0	0	1	1	0	yes.
SBIC-770	The following statement was made in Singapore: What's the difference between heroine and a black person? I think twice about shooting heroin.. Is the given statement hateful?	1	1	1	1	1	1	yes.
AU-YouTube-29	The following statement was made in Singapore: JUSTIN TRUDEAU PM OF CANADA SELF PROCLAIMED FEMINIST LOVES ENSLAVEMENT OF WOMEN BY ISLAMIC TERRORISTS BUT MAYBE KARMA IS COMING HOME TO THIS BASTARD HE HAS CORONAVIRUS HOPEFULLY IT WILL BE FATALE. Is the given statement hateful?	1	1	1	1	1	1	yes.
AU-YouTube-30	The following statement was made in Singapore: Watch the video. Her murderers had SMILES and looks of nonchalance on their faces. To them, this was fun and no big deal.. Is the given statement hateful?	0	0	0	0	0	0	no.
SBIC-949	The following statement was made in Singapore: what do you call a good looking muslim ? asif. Is the given statement hateful?	1	1	1	1	1	1	no.
SBIC-971	The following statement was made in Singapore: why did a black man cross the road ? hey ! gimme back my wallet !. Is the given statement hateful?	1	1	1	1	0	1	yes.
SG-Reddit-4	The following statement was made in Singapore: So with the repeal of 377A, married men are going to church to have gay sex?. Is the given statement hateful?	1	0	1	1	1	1	no.
SBIC-64	The following statement was made in Singapore: 'As long as we never make another mistake the left will let us speak' Good luck with that, altlite fags.. Is the given statement hateful?	1	1	1	1	1	0	yes.
SBIC-557	The following statement was made in Singapore: RT @USER: I'm tired of fat hoes calling themselves "thick". Bitch, yo fat ass can't even bend over and touch your toes withou .... Is the given statement hateful?	1	1	0	0	1	1	yes.
SBIC-220	The following statement was made in Singapore: Broke: Worried that a 3rd world immigrant is going to murder me or someone in my family Woke: Worried that a jury of 3rd world immigrants will let them get away with it #KateSteinle. Is the given statement hateful?	1	1	1	1	1	1	yes.
SBIC-424	The following statement was made in Singapore: I was hoping for a killer deal at the Mandalay Bay but it's still $410 a night. It's not like people are dying to get in there. also Who do I gotta kill to get a better price on a room. Is the given statement hateful?	0	0	0	0	0	0	no.
ZA-YouTube-24	The following statement was made in Singapore: let him sing . He is uniting the boers again .. Is the given statement hateful?	0	0	0	0	0	0	no.
SBIC-793	The following statement was made in Singapore: What’s the difference between heroin and niggers? I’d actually think twice before shooting heroin. Is the given statement hateful?	1	1	1	1	1	1	yes.
SG-Reddit-55	The following statement was made in Singapore: No thanks. Maybe if got ISIS vtuber mascot ask to join then I consider.. Is the given statement hateful?	0	0	1	0	0	0	no.
AU-YouTube-59	The following statement was made in Singapore: So the Biden regime will invite an openly Pedophile next , to stop the stereotype about MAPS . People ? FJB AND HIS REGIME 🤬. Is the given statement hateful?	0	1	0	1	0	0	yes.
SBIC-568	The following statement was made in Singapore: Reminder: it is at the very least Not any more difficult for an actual deformed person to find a partner than a conventional but non-attractive one. Is the given statement hateful?	1	0	1	1	0	1	no.
SBIC-104	The following statement was made in Singapore: @USER And once he called me an ungrateful bitch and retarded nigga in an argument. It's how we argued. Now… URL. Is the given statement hateful?	1	1	1	1	1	0	yes.
SBIC-219	The following statement was made in Singapore: Blue Bell ice cream has one showing five kids one black playing in the fields and barn .. Is the given statement hateful?	0	0	0	0	0	1	no.
SBIC-187	The following statement was made in Singapore: Angela Spain was murdered in her home by a drifter negro .. Is the given statement hateful?	1	1	1	1	1	1	yes.
SBIC-107	The following statement was made in Singapore: @USER You don't have any kids?! What are you, one of them queers!?. Is the given statement hateful?	1	1	1	1	1	0	yes.
SBIC-286	The following statement was made in Singapore: Girls will literally try to talk to you about how bad your ex is, then literally be blowing their phone up behind your back. Smh &#128514;. Is the given statement hateful?	0	0	0	0	0	1	no.
SBIC-15	The following statement was made in Singapore: "@USER No.. that's me laughing at your desperate attempts to ""explain-away"" people that don't believe/accept your cult's bullshit". Is the given statement hateful?	0	1	1	0	0	0	yes.
SG-YouTube-50	The following statement was made in Singapore: I worry that one day it is a must to be gay as society becomes gay…. Is the given statement hateful?	1	1	1	1	1	1	no.
AU-YouTube-23	The following statement was made in Singapore: Made out of paper.... fuelled by curry farts!. Is the given statement hateful?	0	0	1	0	1	0	no.
ZA-Reddit-8	The following statement was made in Singapore: This is a very sweet message, thank you for posting, OP. Wishing you a lovely week ahead. <3 But now you've made me wish for a rainbow doughnut and my fat ass can't stop thinking about it. xD. Is the given statement hateful?	0	0	0	0	0	0	no.
AU-YouTube-32	The following statement was made in Singapore: kick these cunts out oz catch hold of your selves. Is the given statement hateful?	1	0	1	0	1	1	yes.
SBIC-338	The following statement was made in Singapore: How do you know your dad is fucking your sister? When her body isn’t in the freezer.. Is the given statement hateful?	0	0	0	0	0	0	yes.
SBIC-702	The following statement was made in Singapore: What do you call a muslim girl in a birthday party? Drone target.. Is the given statement hateful?	1	1	1	1	1	1	yes.
SBIC-2	The following statement was made in Singapore: """Almost called you to ask if you were okay... u were eating A LOT of food on your IG story yday. Are you going through things?"" Wow thx &#128528;&#128514;". Is the given statement hateful?	0	0	0	0	0	0	no.
SBIC-427	The following statement was made in Singapore: I was with a Jewish boy in DT Food today. I said to him "One oven a day keeps the Jews away" He hasn't talked to me since.. Is the given statement hateful?	1	1	1	1	1	1	yes.
SBIC-182	The following statement was made in Singapore: An Asian woman just gave me a handjob while fingering my ass Which isnt what i meant when i asked her to give me a 'Hand Roll and Pork Intestines That's the problem with having the Chinese Massage place right next to the Chinese takeout place. Is the given statement hateful?	1	1	1	1	1	1	no.
ZA-YouTube-44	The following statement was made in Singapore: Soon only the monkeys will be left at the circus. Is the given statement hateful?	0	0	0	1	0	0	no.
SBIC-525	The following statement was made in Singapore: My son pointed at a homeless man and said "Human waste!!" I was so ashamed and embarrassed I told him its "waste of a human". Kids are so dumb.. Is the given statement hateful?	1	1	1	1	1	0	no.
SBIC-742	The following statement was made in Singapore: What the fuck is wrong with these players? No fighting spirit whatsoever! Losing the ball and then walking!!!!. Is the given statement hateful?	0	0	0	0	0	0	yes.
GB-YouTube-23	The following statement was made in Singapore: Now that a high profile burning of the homosexual and queer 'pride' flag has been made, maybe he should do the same in order to recant. I'm surprised that more of this is being done by Muslims.. Is the given statement hateful?	1	1	1	1	1	0	yes.
SBIC-398	The following statement was made in Singapore: I like my girlfriends like I like my dogs Rescued from a young age and stays in their cage. Is the given statement hateful?	1	1	1	0	0	1	no.
ZA-Reddit-14	The following statement was made in Singapore: Definitely has to do with “Kill the Boer” Rand is weakening, even to the Euro. As it seemed to be getting stronger something happens again.. Is the given statement hateful?	0	0	0	0	0	0	no.
SBIC-28	The following statement was made in Singapore: "Madam, your son just called me ugly!" The mother apologizes shamefacedly, "I'm so sorry, I must have told him like a thousand times it is wrong to judge people just from how they look...". Is the given statement hateful?	0	0	0	0	0	0	no.
SBIC-389	The following statement was made in Singapore: I heard today that the niggers were freed from their owners. Then my slave woke me up. What a nightmare!. Is the given statement hateful?	1	1	1	1	1	1	yes.
SBIC-29	The following statement was made in Singapore: "Niggas don't lie, our ugly friend put up a pic we just gon write ""nigga u ugly"" under it". Is the given statement hateful?	1	1	1	1	0	1	yes.
SBIC-106	The following statement was made in Singapore: @USER @USER Well, NI seems stuck. RoI doesn't want it. Westminster views it as a burden. It'll have to help itself, I think.. Is the given statement hateful?	0	0	0	0	0	0	no.
AU-Reddit-68	The following statement was made in Singapore: Pedophile cult covers up pedophila. What's new? Poor woman.. Is the given statement hateful?	0	0	0	0	0	0	yes.
SBIC-671	The following statement was made in Singapore: We must never forget what happened during the Holocaust. Three million survived.. Is the given statement hateful?	1	1	1	1	1	0	no.
GB-Reddit-12	The following statement was made in Singapore: People wont know that you are native american. They will probably think you are Indian or Paki.. Is the given statement hateful?	1	0	1	1	1	0	yes.
SBIC-458	The following statement was made in Singapore: If you hit a girl Is it destruction of property?. Is the given statement hateful?	1	1	1	1	1	1	no.
GB-YouTube-12	The following statement was made in Singapore: Including chinese immigrants credible questions they bring illegal drugs and gambling that not allowed in their own country. Is the given statement hateful?	1	1	1	1	1	0	yes.
SBIC-388	The following statement was made in Singapore: I have one more day of fucking school. God nansemond is fucking retarded. Is the given statement hateful?	0	0	0	0	1	1	yes.
SBIC-828	The following statement was made in Singapore: Why don't bookmakers take bets on the special Olympics? because they're all winners. Is the given statement hateful?	1	0	1	1	1	0	no.
SBIC-447	The following statement was made in Singapore: If a deaf person has Parkinson's disease, do they also have Tourette's? Three disabilities in one joke. That's pretty good. Is the given statement hateful?	1	1	1	0	1	1	yes.
SBIC-678	The following statement was made in Singapore: What an excellent book, reading it now and seeing clearly the cycles that repeat.. Is the given statement hateful?	0	0	0	0	0	0	no.
SBIC-893	The following statement was made in Singapore: i like my women like my wine aged <number> years and stored in the cellar. Is the given statement hateful?	1	1	1	1	1	1	no.
GB-YouTube-70	The following statement was made in Singapore: @USER queer theory is making you crazy. Is the given statement hateful?	1	1	1	1	0	0	yes.
SBIC-843	The following statement was made in Singapore: YALL MOTHERFUCKER NORMIES WILL GET SPOILERS ON SEASON 8 OF GAME OF THRONES IF YOU DONT LEAVE NOW. Is the given statement hateful?	0	0	0	0	0	0	yes.
ZA-Reddit-72	The following statement was made in Singapore: Hey PIC stop being racist cunts. Is the given statement hateful?	0	0	0	0	0	1	yes.
ZA-Reddit-17	The following statement was made in Singapore: A Jew talking about genocide , no surprise there. Is the given statement hateful?	1	1	1	1	1	1	yes.
GB-Reddit-71	The following statement was made in Singapore: Look on the plus side... he hates Nazi's!. Is the given statement hateful?	0	0	1	0	0	0	no.
GB-Reddit-20	The following statement was made in Singapore: Why not include TUV in this pole. Who's the best politician there???. Is the given statement hateful?	0	0	0	0	0	0	no.
SBIC-426	The following statement was made in Singapore: I was washing the car with my 2 year old daughter. When she started crying, my wife told me to put her down.. Is the given statement hateful?	0	0	0	0	0	0	no.
SBIC-591	The following statement was made in Singapore: Sometimes I think I enjoy gay sex... But that's just the French in me. Is the given statement hateful?	1	1	1	1	1	0	no.
SBIC-644	The following statement was made in Singapore: This random girl came up to me last night & said she was coming home w me. My heart started beating so fast y'all I was SCARED & AFRAID.. Is the given statement hateful?	0	0	0	0	0	0	no.
GB-Reddit-34	The following statement was made in Singapore: It’s a pity these shops generally aren’t licensed to sell booze because the Poles do some very good beer.. Is the given statement hateful?	0	0	0	0	0	0	no.
SG-YouTube-63	The following statement was made in Singapore: to talk against China he must have balls of titanium. Is the given statement hateful?	0	0	0	0	0	0	no.
ZA-YouTube-32	The following statement was made in Singapore: How can you say singing kill the blacks is not ok but kill the boer is fine. Jy kan baie k@USER praat neh.. Is the given statement hateful?	0	1	0	1	0	0	yes.
SBIC-287	The following statement was made in Singapore: Gladio's tattoo must've cost so much fucking money. Is the given statement hateful?	0	0	0	0	0	0	no.
SG-YouTube-18	The following statement was made in Singapore: the chinese are risk adverse, wont go to war unless absolutely necessary, they think long game, if china wanted to, it could create miitary parade ten times size of north korea. Is the given statement hateful?	0	0	0	0	0	0	no.
SBIC-373	The following statement was made in Singapore: I feel that since political correctness is such a massive topic it's good to bring it up. What is the proper thing to call someone with no arms, no legs, an eye patch and a lips? Names.. Is the given statement hateful?	0	0	0	0	0	0	no.
SG-Reddit-12	The following statement was made in Singapore: Need homos to contribute to GDP. Is the given statement hateful?	1	1	1	1	1	1	no.
SBIC-630	The following statement was made in Singapore: There is one language I don't understand and that language is.....Snowflake libtard!. Is the given statement hateful?	1	1	0	1	1	1	yes.
ZA-YouTube-39	The following statement was made in Singapore: Yea them Boers are still here since 1652 but no attack on Dem lol😂😂😂😂. Is the given statement hateful?	0	0	0	0	1	0	no.
SG-Reddit-28	The following statement was made in Singapore: Why doesn't he ask why SMRT CEO is always a former SAF general? By the way, just curious whether in the first place is there an application submitted by the Malays for the interns?. Is the given statement hateful?	0	0	0	0	0	0	no.
ZA-Reddit-66	The following statement was made in Singapore: Apparently, Julius replied with masepa (cunt) to Elon Musk Watch how Julius account gets banned from X. Elon should ban all political parties from X. Is the given statement hateful?	0	0	0	0	0	0	yes.
SBIC-564	The following statement was made in Singapore: RT @USER: You should want a bad bitch like this URL. Is the given statement hateful?	0	0	0	0	0	1	no.
SBIC-304	The following statement was made in Singapore: Have you ever tried Ethiopian cuisine? Nether have they. Is the given statement hateful?	1	0	1	1	0	1	no.
AU-YouTube-49	The following statement was made in Singapore: Any people who are supporting this. They are supporting pedophiles who are going to target children to think this normal thinking. Is the given statement hateful?	1	0	1	1	0	1	yes.
GB-Reddit-17	The following statement was made in Singapore: And you should ask tranny's what they call there hole. Is the given statement hateful?	1	1	1	1	1	1	yes.
SG-Reddit-9	The following statement was made in Singapore: When she pulls the I have Malay and Indian friends card you know what's going down. Is the given statement hateful?	0	0	0	0	0	0	no.
ZA-YouTube-54	The following statement was made in Singapore: Rights ,hahahahaa what bullshit this rainbow bullshit.. Is the given statement hateful?	0	1	0	1	0	0	yes.
SBIC-712	The following statement was made in Singapore: What do you call an autistic gymnast? A leo-Tard. Is the given statement hateful?	1	1	1	1	1	1	yes.
SBIC-606	The following statement was made in Singapore: Teenage boys wear skirts to school to protest against 'no shorts' policy • r/news. Is the given statement hateful?	0	0	0	0	0	0	no.
GB-Reddit-70	The following statement was made in Singapore: Nazi's claiming Churchill as their hero is like a poo worshipping toilet roll.. Is the given statement hateful?	0	0	0	0	1	0	yes.
SBIC-164	The following statement was made in Singapore: After going blind a man stabbed himself to death. Know Why? He could no longer see the point. Is the given statement hateful?	0	0	0	0	0	0	no.
GB-YouTube-53	The following statement was made in Singapore: Civil war to expell Islam and queers needed .. Is the given statement hateful?	1	1	1	1	1	1	yes.
AU-Reddit-26	The following statement was made in Singapore: Jesus a week before the guy was supposed to get married, and the article says that the murderer was unknown to the victims. How horrible and random.. Is the given statement hateful?	0	0	0	0	0	0	no.
SG-Reddit-65	The following statement was made in Singapore: lol. first time i hear of ah tiong self radicalisation. Is the given statement hateful?	0	0	1	0	0	0	no.
SBIC-727	The following statement was made in Singapore: What does the president say to get rid of all the black people in his country? Nothing. He just opens the cage.. Is the given statement hateful?	1	1	1	1	1	1	yes.
SBIC-121	The following statement was made in Singapore: A Madden player was fatally shot during a touchdown... Trueboy really was in the 'End Zone'. Is the given statement hateful?	0	0	0	0	0	0	no.
ZA-YouTube-3	The following statement was made in Singapore: Do away with race classification, jobs for all, rainbow 🌈 nation. Is the given statement hateful?	0	0	0	0	0	0	no.
SBIC-734	The following statement was made in Singapore: What is worse than Hitler,Stalin,Mao Nd PolPot put together That stupid Chadbot. Is the given statement hateful?	0	0	1	0	0	1	yes.
SBIC-925	The following statement was made in Singapore: the Brexit snake May must be pleased that throwing that election is bearing fruit.. bitch will fuck Brexit and play the victim - maybe a tear at some stage ?. Is the given statement hateful?	1	1	1	0	1	1	yes.
SG-YouTube-1	The following statement was made in Singapore: @USER those day we are living in Ang mo chu, not adap chu.. Is the given statement hateful?	0	0	0	0	0	0	no.
SBIC-143	The following statement was made in Singapore: A man of opposite color of white is offensive I just want to state my hate for them /s might be needed. Is the given statement hateful?	1	1	1	1	1	1	yes.
SG-YouTube-31	The following statement was made in Singapore: @USER As long you have Chinatown in your country CCP will said your country is part of China. Same as Taiwan just because they speak Chinese and sharing food similarity they are part of China.. Is the given statement hateful?	0	0	0	0	0	0	no.
ZA-Reddit-15	The following statement was made in Singapore: That boer pampoene song always hits definitely watch the music videos Berry hoener Bob Jan And maybe captuin van die syler. Is the given statement hateful?	0	0	0	0	0	0	no.
AU-Reddit-51	The following statement was made in Singapore: I run a sparky business and I have to answer every call. Honestly 50% of calls now are from some cunt trying to scam me, or sell me something. Is the given statement hateful?	0	0	0	0	0	0	no.
GB-Reddit-48	The following statement was made in Singapore: Does the person expect all musicals about gays to be called "Gay! A gay musical"?. Is the given statement hateful?	0	0	0	0	1	0	no.
ZA-YouTube-42	The following statement was made in Singapore: Nonsense is your president in kwerekwere country hamba we don't care go home. Is the given statement hateful?	1	0	1	1	1	1	yes.
GB-YouTube-35	The following statement was made in Singapore: Scrap the processing, SIMPLY ROUND THESE ILLEGAL CRIMINAL IMMIGRANTS UO GET THEM ON A BOAT AND SEND THEM TO THE DESERTS THEY CAME FROM, OR FRANCE.. Is the given statement hateful?	1	1	1	1	1	1	yes.
GB-YouTube-34	The following statement was made in Singapore: By definition these " illegal " immigrants are criminals but instead of being penalised , like everyone else, they get rewarded. A total insult to the British people. Is the given statement hateful?	1	0	1	1	1	1	yes.
ZA-YouTube-0	The following statement was made in Singapore: We blacks must stop 🛑 visiting white owned resorts , they only want your money, while they see you as Monkey 🙈. Is the given statement hateful?	1	0	1	1	1	1	yes.
AU-YouTube-51	The following statement was made in Singapore: Eww this is all disgusting...next they will have pedophiles claiming they identify as a child ....crazy. Is the given statement hateful?	1	0	1	1	1	0	yes.
AU-YouTube-70	The following statement was made in Singapore: He isn't gay he is miserable. Whether he is hetero or homo is another matter.. Is the given statement hateful?	0	0	0	0	1	0	no.
SBIC-50	The following statement was made in Singapore: #YesAllWomen because my mother hoped I would inherit a better world than this. Is the given statement hateful?	0	0	0	0	0	0	no.
SBIC-82	The following statement was made in Singapore: 2018 Democrat Strategy: Lie about Conservative Candidates Dredge up paid examples of lies Flood advertising with these lies and liars Bring unqualified voters to the polls by the busload Program voting machines to register "Democrat" at least 1.5:1 ratio Destroy votes immediately after election. Is the given statement hateful?	0	0	1	1	0	0	yes.
AU-Reddit-3	The following statement was made in Singapore: Lmao - time to start your tally. I was gettin "ching chong china-man'd" back in grade 3. Is the given statement hateful?	1	1	1	1	0	1	yes.
SG-YouTube-68	The following statement was made in Singapore: @USER That's what I do not understand. SG dollar is 3 times more than ringgit but the Malaysian Chinese refuse to migrate. What more do these people want?. Is the given statement hateful?	0	0	1	0	0	1	yes.
SBIC-68	The following statement was made in Singapore: (Stolen) A black woman calls her 5 kids Tyrone. How can she tell them apart? By their last names. Is the given statement hateful?	1	1	1	1	1	1	yes.
SBIC-331	The following statement was made in Singapore: How do Autists deal with school? With a reeeeeeeeee-volver. Is the given statement hateful?	1	1	1	1	1	1	yes.
GB-Reddit-24	The following statement was made in Singapore: No pole on this stage set?. Is the given statement hateful?	0	0	0	0	0	0	no.
SBIC-325	The following statement was made in Singapore: How can a woman take u serious when you're a hoe? I mean RT @USER: How can a nigga take you serious when youre a hoe? Lol like... Is the given statement hateful?	1	1	1	0	1	1	yes.
SBIC-130	The following statement was made in Singapore: A black man and a jew jump off a building. Who lands first No one cares. Is the given statement hateful?	1	1	1	1	1	1	yes.
SBIC-314	The following statement was made in Singapore: Hey son, you know what your brother said when he lost his virginity? Dad, please don’t. Your exactly right.. Is the given statement hateful?	0	0	0	0	0	0	no.
AU-YouTube-69	The following statement was made in Singapore: @USER ...That's not what the the news anchor said concerning the Ugandan law. He said Death penalty is for AGGREVATED homo crimes against children, and passing HIV to same sex partners.. Is the given statement hateful?	0	0	0	0	0	0	no.
AU-Reddit-50	The following statement was made in Singapore: She will be ironing for a very long time in syd...chinks everywhere. She may need a steam press. A BIG ONE😷. Is the given statement hateful?	1	1	1	1	1	1	yes.
SBIC-853	The following statement was made in Singapore: You mad because your bitch found out you a hoe &#128514;&#129335;&#127997;‍♀️. Is the given statement hateful?	0	1	0	0	0	0	yes.
AU-Reddit-62	The following statement was made in Singapore: Bearded tit has a heap on! Sad Dyke Sundays is making a return this weekend too ☺️. Is the given statement hateful?	0	1	0	0	0	0	no.
SBIC-489	The following statement was made in Singapore: Leicester FC rising up the league, almost from the dead. Resurrection, U might say. Shakespeare's got it right. Richard 3 found in carpark.. Is the given statement hateful?	0	0	0	0	0	0	no.
SBIC-709	The following statement was made in Singapore: What do you call an Hispanic group that targets black people? The Que, Que, Que. Is the given statement hateful?	1	1	1	1	1	1	yes.
SBIC-677	The following statement was made in Singapore: What a nice feeling to be in love with God. No pain. No heartache. No disappointment. Just blessings and non stop joy.. Is the given statement hateful?	0	0	0	0	0	0	no.
SBIC-364	The following statement was made in Singapore: I could never be a liberal because I'm positive my head won't fit up my own ass.. Is the given statement hateful?	1	1	1	0	1	0	no.
SBIC-461	The following statement was made in Singapore: If you're a 7-8/10 minority, you can't even compete with 5-6/10 white guys Honestly, if you're a minority incel, suicide is the better option.. Is the given statement hateful?	1	1	1	1	1	1	yes.
AU-YouTube-67	The following statement was made in Singapore: Good for Uganda. LGBT is a trojan horse to transgenderism and grooming children. The slippery slope is real.. Is the given statement hateful?	1	1	1	1	0	1	yes.
SBIC-111	The following statement was made in Singapore: @USER why did Nunes recuse himself? Why does your party refuse to stand up and fight. I'm disappointed.. Is the given statement hateful?	0	0	0	0	0	0	no.
SBIC-259	The following statement was made in Singapore: Don't subtweet me you conniving stupid idiotic bitch &#128580;. Is the given statement hateful?	0	0	0	0	0	0	yes.
SBIC-617	The following statement was made in Singapore: The first thing I do When I see a new haiku Is count syllables. Is the given statement hateful?	0	0	0	0	0	0	no.
SBIC-54	The following statement was made in Singapore: &#8220;@USER: done w. All these fuck niggas &#128554;&#128514; snip snip hoe &#9996;&#65039;&#9986;&#65039;&#8221; stfu. Is the given statement hateful?	1	1	1	1	1	1	yes.
SG-Reddit-31	The following statement was made in Singapore: Means the neighbour don't like him 🤣 My Malay neighbour always cook for my family and bake cookies. We can't cook so we just buy cookies during CNY.. Is the given statement hateful?	0	0	0	0	0	0	no.
SG-YouTube-3	The following statement was made in Singapore: These scammers scam our moneys, so please do not give in to china demand for the moneys, heard they sending a vice minister here for their illegal gains.. Is the given statement hateful?	1	0	1	1	1	1	no.
SBIC-555	The following statement was made in Singapore: RT @USER: Cue the liberal left's Uncle Tom attacks against Tim Scott in 4...3...2... #tcot #teaparty #GOP. Is the given statement hateful?	1	1	0	1	1	0	yes.
SBIC-821	The following statement was made in Singapore: Why do epileptics bexome atheists in December? Because they found out that "Jesus is the reason for the seizin'". Is the given statement hateful?	0	0	1	0	1	0	no.
SBIC-513	The following statement was made in Singapore: My daughter said she wanted to see her siblings. So I cum on her eye.. Is the given statement hateful?	0	1	0	0	0	0	yes.
GB-Reddit-10	The following statement was made in Singapore: For me it's the transphobic gays and lesbians. Like once the right wing nuts are done with us, who do you think they're going to target next??. Is the given statement hateful?	1	0	1	1	1	1	yes.
SBIC-517	The following statement was made in Singapore: My girlfriend broke up with me for stealing her wheelchair I know she'll come crawling back eventually. Is the given statement hateful?	1	0	1	1	0	1	no.
ZA-YouTube-52	The following statement was made in Singapore: haa Malema didn't you say you have joined the Lamba Jews? what are the Lamba Jews views about this?. Is the given statement hateful?	0	0	0	0	0	0	no.
SBIC-436	The following statement was made in Singapore: I'm guessing that you are not from Ireland as then you would know how well organised AFA are .. Is the given statement hateful?	0	0	0	0	0	0	no.
SBIC-806	The following statement was made in Singapore: Who is the best boxer of all time? Jim Jones. He knocked out 909 people with one punch.. Is the given statement hateful?	0	0	0	0	0	0	no.
ZA-Reddit-5	The following statement was made in Singapore: Hottentots Holland is the name of the HS i went to and the name is unchanged so im guessing, NO.. Is the given statement hateful?	0	0	0	0	0	0	no.
ZA-Reddit-49	The following statement was made in Singapore: A crisis created by you amd yours and your chommies in the ANC fix your own fuck ups, oh yes, I forgot, you're too fokken dom. Full of hot air and nothing else, get fucked cunt.. Is the given statement hateful?	1	1	0	0	1	1	yes.
SBIC-157	The following statement was made in Singapore: Aan indian was taking a dump and died. Strange, isn't it?? He didn't pay attention to the train heading towards him.... Is the given statement hateful?	1	1	1	1	1	1	yes.
SBIC-17	The following statement was made in Singapore: "@USER i deadass just hear hobi saying ""park jimin"" honestly this could be a play in our ears lmao". Is the given statement hateful?	0	0	0	0	0	0	no.
SBIC-483	The following statement was made in Singapore: Know the best part about raping a midget? When they scream like a fucking child.. Is the given statement hateful?	1	1	1	1	1	1	yes.
SBIC-281	The following statement was made in Singapore: Financial Fatherhood Are men legally able to waive financial responsibility in Texas if they were part of an unplanned/unwanted pregnancy?. Is the given statement hateful?	0	0	0	0	0	0	no.
SBIC-100	The following statement was made in Singapore: @USER hii fag. :). Is the given statement hateful?	1	1	1	1	1	0	yes.
GB-YouTube-18	The following statement was made in Singapore: saw a youtuber channel eh went to village in slovkia alot of the gypsy people there want to come back to uk. Is the given statement hateful?	0	1	0	0	0	1	no.
GB-YouTube-48	The following statement was made in Singapore: If you really want to shorten the war, Russia, try messing with the Poles 😂. Is the given statement hateful?	0	0	0	0	0	0	no.
SBIC-773	The following statement was made in Singapore: What's the only warm organ inside a deceased female body? My Dick. (it's not illegal if the cops don't know about it). Is the given statement hateful?	1	0	1	0	1	1	yes.
ZA-Reddit-61	The following statement was made in Singapore: Few people know that the concentration camp concept which was widely used in WW2 by the nazis was first perfected in South Africa during the Boer war's by the British.. Is the given statement hateful?	0	0	0	0	0	0	no.
SBIC-36	The following statement was made in Singapore: "Red Pill" cuck gets used for money on a date, writes a field report on it lmfao. Is the given statement hateful?	0	0	0	1	0	1	yes.
SBIC-172	The following statement was made in Singapore: All girls have rape fantasies. At least all the girls in the nursery I teach at.. Is the given statement hateful?	1	0	1	1	1	1	yes.
SBIC-246	The following statement was made in Singapore: Did you know that Ray was not the inventor of the X-Rays? He was his little brother.. Is the given statement hateful?	0	0	0	0	0	0	no.
ZA-YouTube-31	The following statement was made in Singapore: So what about the old flag that allso an old fag but banned why that is only a emblem but to me kill a boer means you can kill a boer thats ok.. Is the given statement hateful?	1	1	1	1	1	1	yes.
SBIC-443	The following statement was made in Singapore: If I had to choose only one tv channel, I will go for Diva. I love the series, movies even the ads and all.. Is the given statement hateful?	0	0	0	0	0	0	no.
ZA-YouTube-16	The following statement was made in Singapore: Lol, guess he will meet the boers who killed his ancestors. 😂. Is the given statement hateful?	1	0	1	1	1	0	yes.
ZA-Reddit-45	The following statement was made in Singapore: Possibly coconut-ice.. Is the given statement hateful?	0	0	0	0	0	0	no.
SBIC-236	The following statement was made in Singapore: Currently sitting down wishing a bitch would.&#128133;. Is the given statement hateful?	0	0	0	1	0	1	yes.
SBIC-587	The following statement was made in Singapore: So, the Holocaust confuses me... So, the Holocaust confuses me... Like, I don't understand why anyone would want to survive it, because they would still be a jew afterwards.... Is the given statement hateful?	1	1	1	1	1	0	yes.
GB-Reddit-32	The following statement was made in Singapore: I'm a food snob (wouldn't touch walkers with a barge pole) but pretty much all tescos own brand food is excellent these days I find.. Is the given statement hateful?	0	0	0	0	0	0	no.
SBIC-496	The following statement was made in Singapore: Man that run game ain't no hoe. Fuck Alex. don't even need his bitch ass. Is the given statement hateful?	0	0	0	0	0	1	yes.
AU-YouTube-44	The following statement was made in Singapore: Shout it out Meg!!..A CAT CANNOT BE A DOG!!!!!!..A FROG CANNOT BE A RABBIT..A BUTTERFLY CANNOT BE PIGEON...A FISH CANNOT BE AN ANT AND FINALLY A MAN CANNOT BE A WOMAN.!!!.. Is the given statement hateful?	1	1	1	1	0	1	yes.
GB-Reddit-13	The following statement was made in Singapore: I apologise upfront for this, but what in gods name is a queer community space, and how does it differ from a community space? Are the benches pink or something?. Is the given statement hateful?	1	0	1	1	0	1	no.
GB-Reddit-62	The following statement was made in Singapore: Cannot prove existence of God Can prove some men like cock Gays win. Is the given statement hateful?	1	0	0	1	1	1	yes.
SBIC-154	The following statement was made in Singapore: A white male toddler needs to have its head smashed by a hammer because its a rapist But every nigger and a spic can rape a newborn in the ass and be seen as a deity for it. Is the given statement hateful?	1	1	1	1	1	1	yes.
SBIC-835	The following statement was made in Singapore: Wind 6.6 mph NNW. Barometer 1029.3 hPa, Falling slowly. Temperature 15.5C, feels like 12.4C. Rain today 0.0 mm. Humidity 51%. f1.. Is the given statement hateful?	0	0	0	0	0	0	no.
SG-Reddit-21	The following statement was made in Singapore: Lmao that dumbass mat yoyo. Which halal place in the whole world sells pork as well? This kambing never read his qoran properly. Is the given statement hateful?	1	1	1	0	1	0	yes.
SBIC-490	The following statement was made in Singapore: Let's hope they rot in hell. Yeah, that's how the Trumpocalypse makes me feel &#128544; URL. Is the given statement hateful?	1	1	1	1	1	1	yes.
ZA-YouTube-6	The following statement was made in Singapore: Wow. Rainbow 🌈 turned completely black😅. Is the given statement hateful?	0	0	0	0	1	1	no.
SBIC-903	The following statement was made in Singapore: illegal check to the head? are you fucking stupid???. Is the given statement hateful?	0	0	0	0	0	1	yes.
AU-Reddit-42	The following statement was made in Singapore: Curries on Blvd Joondalup does a good goat curry. Is the given statement hateful?	0	0	0	0	0	0	no.
ZA-YouTube-50	The following statement was made in Singapore: @USER you are wrong as you knew and your not a real christian so .... who cares what you say old bean? Go pray to satan as you do sound as if u do anyway.. Is the given statement hateful?	1	1	0	1	1	1	yes.
SBIC-906	The following statement was made in Singapore: jews what 's the best jew joke ever ? the holocaust. Is the given statement hateful?	1	1	1	1	1	1	yes.
SBIC-457	The following statement was made in Singapore: If you ever hated on me... bitch naw I don't fuck wit you. Is the given statement hateful?	0	0	0	0	0	0	yes.
GB-YouTube-25	The following statement was made in Singapore: We Poles 🇵🇱 share with British 🇬🇧common Christian legacy ✝️, but you do prefer Muslims ☪️ 👍. Is the given statement hateful?	0	0	0	0	1	1	no.
SBIC-572	The following statement was made in Singapore: Safe havens for ILLEGAL immigrants is absolute nonsense. The left are protecting their voting base by harboring criminals. Citizens b damned. Is the given statement hateful?	1	0	1	0	1	1	yes.
SG-YouTube-33	The following statement was made in Singapore: Many are relatives of china government officials. Thailand should give china a list of buyers so that proper tax levied against them or send those govt officials to jail. Is the given statement hateful?	0	0	0	0	0	1	no.
ZA-YouTube-61	The following statement was made in Singapore: You Ashkenazi are being punished by Yah. Fake Jews. Is the given statement hateful?	1	1	1	1	1	1	yes.
SBIC-909	The following statement was made in Singapore: my african friend asked me if he could ask for bob and vegene i told him "u better ask for food". Is the given statement hateful?	1	0	1	1	1	1	no.
AU-Reddit-5	The following statement was made in Singapore: It's not lock down, it's lock out, which was long before the pandemic. For all the awesome Leb foodie night life, come out to Bankstown area, and then drop by my place for Wheel of Yagoona. Is the given statement hateful?	0	0	0	0	0	0	no.
SBIC-77	The following statement was made in Singapore: .@USER really does talk like a buck nigger. Is the given statement hateful?	1	1	1	1	1	1	yes.
SBIC-855	The following statement was made in Singapore: You niggas talking to these females trying to get some pussy but dont realize you're only boosting their ego and getting curved.. Is the given statement hateful?	1	0	1	1	1	0	yes.
SBIC-898	The following statement was made in Singapore: i want to be reincarnated as a bacteria living in the pubic hair of the artist IU. Is the given statement hateful?	0	0	0	0	0	0	no.
SBIC-378	The following statement was made in Singapore: I got my son a trampoline but noooo he just sits in a wheelchair and complains.. Is the given statement hateful?	0	0	0	0	0	0	no.
SBIC-780	The following statement was made in Singapore: Whats the difference between a blonde and an elevator? You dont even have to press a button for her to open up.. Is the given statement hateful?	1	1	1	0	1	1	yes.
SBIC-141	The following statement was made in Singapore: A long time ago, scientists started to combine dog DNA along with human DNA. The outcome turned out to be Mexican girls.. Is the given statement hateful?	1	1	1	1	1	1	yes.
AU-YouTube-15	The following statement was made in Singapore: What part of hammass being labeled terrorists did you miss???. Is the given statement hateful?	0	0	0	0	1	0	no.
SBIC-20	The following statement was made in Singapore: "Bylsma on Justin Bailey: ""He did quite well up here, and the challenge is sustaining that. Saw dips and inconsistencies in his game.""". Is the given statement hateful?	0	0	0	0	0	0	no.
ZA-Reddit-56	The following statement was made in Singapore: Kill the boer is a struggle song it'll remain that way, whether you like it or not.. Is the given statement hateful?	0	0	0	0	0	0	yes.
ZA-Reddit-16	The following statement was made in Singapore: Poplak: you are a disgusting sack of molding shit. How that for ‘satire’, you urban son of a toothless whore?. Is the given statement hateful?	0	0	0	0	1	0	yes.
SBIC-686	The following statement was made in Singapore: What did the little nerd kid say to his bullies after class? Nothing they're all dead. Is the given statement hateful?	0	0	0	0	0	0	yes.
SBIC-820	The following statement was made in Singapore: Why do blacks only have nightmares? Because the rednecks shot the only one with a dream.. Is the given statement hateful?	1	1	1	1	1	1	yes.
SBIC-516	The following statement was made in Singapore: My friend married a cancer patient. Looks like he got himself a honeymoon.. Is the given statement hateful?	0	0	0	0	0	1	no.
SBIC-969	The following statement was made in Singapore: when ya name gain weight ya ex hoes can't let go. Is the given statement hateful?	0	0	0	0	0	1	no.
SG-Reddit-61	The following statement was made in Singapore: LMAO which idiot muslim actually think arabiki = arab? fking hell i thought only china chinese people have this level of thinking. Is the given statement hateful?	1	1	1	1	1	1	yes.
SBIC-288	The following statement was made in Singapore: God in Heaven Hitler on Earth Jews in the atmosphere. Is the given statement hateful?	1	1	1	1	1	0	yes.
SBIC-349	The following statement was made in Singapore: How to tell if you are ugly If you are over 20 and a virgin, and it's not by choice, then you are ugly.. Is the given statement hateful?	0	0	0	0	0	1	yes.
SBIC-634	The following statement was made in Singapore: These fat hoes think they slick posting neck up pics and shit. Is the given statement hateful?	1	1	1	0	1	1	yes.
GB-YouTube-49	The following statement was made in Singapore: Wagner are standing by the Belarus border in case the poles try anything stupid.. Is the given statement hateful?	0	0	0	0	0	0	no.
SBIC-781	The following statement was made in Singapore: Whats the difference between a tweaker and a black person? The tweaker started out as a good person. Is the given statement hateful?	1	1	1	1	1	1	yes.
SBIC-714	The following statement was made in Singapore: What do you call it when you are beating up a mentally insane person? Busting A Nut. Is the given statement hateful?	1	1	1	1	1	0	yes.
SBIC-70	The following statement was made in Singapore: *Goes to store* A box of condoms, please. That’ll be 3,99. Do you want a bag with it? Nah I’m OK. She’s actually quite pretty.. Is the given statement hateful?	0	0	0	0	0	0	no.
ZA-YouTube-9	The following statement was made in Singapore: The arrogance, sanctimonious and self-righteous attitude displayed by farmers who stole land rejecting compensation from the very people they wronged. Even satan is in awe.. Is the given statement hateful?	0	0	0	0	0	1	yes.
SBIC-209	The following statement was made in Singapore: Black ' females ' fighting with black police in Harlem after the officers try to ticket them for skipping their fares .. Is the given statement hateful?	0	0	1	1	0	0	yes.
SBIC-475	The following statement was made in Singapore: Just bout gave up on this season of Big Brother 19 because of Paul, Raven, Elena, and Mark just can't deal with them anymore so I'm focusing more on SURVIVOR and also easing my way catching up on Wrestling also other Pop Culture shows and stuff. Is the given statement hateful?	0	0	0	0	0	0	no.
SBIC-238	The following statement was made in Singapore: Dear Utah Polynesians: Again, stop acting black and speaking ghetto. Speak FOB, you ain't no ghetto niggaz.. Is the given statement hateful?	1	1	1	1	1	1	yes.
SBIC-267	The following statement was made in Singapore: F-K-G Leftists want to destroy every single institution that makes America the country that she is.. Is the given statement hateful?	1	1	1	1	1	0	no.
SG-Reddit-20	The following statement was made in Singapore: There's only about 180000 pinoys in sg.. Is the given statement hateful?	0	0	0	0	0	0	no.
SBIC-756	The following statement was made in Singapore: What's the best thing about fucking twenty four year olds? There's twenty of them.. Is the given statement hateful?	0	0	0	0	0	0	yes.
SBIC-850	The following statement was made in Singapore: You incels are ugly This is why you're incel. Is the given statement hateful?	1	1	1	0	1	1	yes.
SBIC-340	The following statement was made in Singapore: How do you stop a horizon? Push her back down, and slap her if she resists.. Is the given statement hateful?	1	1	0	1	1	1	yes.
SG-Reddit-15	The following statement was made in Singapore: > insulting people who oppose LGBT rights as retarded + comparing them to ISIS. They are. Imposing your own cultures view on others doing NOTHING wrong. ISIS behaviour. Is the given statement hateful?	1	0	1	1	1	1	yes.
SG-Reddit-68	The following statement was made in Singapore: Just ask them to give up citizenship, take up PRC citizenship and move to China. Is the given statement hateful?	0	0	1	0	0	1	no.
AU-YouTube-56	The following statement was made in Singapore: Pandering to groomers and pedophiles, that's the way Joe rolls.. Is the given statement hateful?	0	1	0	0	0	1	yes.
AU-Reddit-0	The following statement was made in Singapore: Imagine how clever he thought he was being writing that tweet - "her last name is Abo; boy, have I got some gold up my sleeve.". Is the given statement hateful?	0	0	0	0	0	0	yes.
SG-Reddit-6	The following statement was made in Singapore: I don't know what kind of shit the prc propaganda are feeding our boomers, I feel like my father is slowly becoming your father.. Is the given statement hateful?	0	0	0	0	0	1	yes.
ZA-Reddit-67	The following statement was made in Singapore: Just don't call him a monkey, literally, or illiterately, for that matter. You'll go to jail, literally, even if if you did not mean he is a literal monkey.. Is the given statement hateful?	0	0	0	0	0	0	no.
SBIC-532	The following statement was made in Singapore: Not All Straight Men - I am frustrated. Unlike on OKCupid, queer folks don&#8217;t have the ability to block... URL. Is the given statement hateful?	0	0	0	1	0	0	no.
SBIC-112	The following statement was made in Singapore: @USER niqqa that's every white person just because some might seem down to earth don't mean there not gonna use nigger against us. Is the given statement hateful?	1	1	1	1	0	1	yes.
AU-YouTube-43	The following statement was made in Singapore: Blow that towel head up. Is the given statement hateful?	1	1	1	1	0	1	yes.
SG-Reddit-47	The following statement was made in Singapore: Complaining regardless of what the government does is not a gay thing, it’s a Singaporean thing.. Is the given statement hateful?	1	1	1	0	1	0	no.
ZA-Reddit-50	The following statement was made in Singapore: Satan Africa. Is the given statement hateful?	1	1	1	1	1	1	yes.
SBIC-912	The following statement was made in Singapore: normies dont know what its like to suffer there whole life they have had it easy,barley lonely,never had to deal with mental illness,and yet they pass judgment on us,we have every right to dislike them. Is the given statement hateful?	0	0	0	1	0	1	yes.
GB-Reddit-43	The following statement was made in Singapore: I think people should just leave the ~~homosexuals about~~ gays alone. They aren't disturbing them. Just leave them alone. They are harmless.. Is the given statement hateful?	0	0	0	0	0	0	no.
AU-Reddit-28	The following statement was made in Singapore: What about little Suzie who going to stop her doing onlyfans an being a disgusting slut. Is the given statement hateful?	1	1	1	1	0	0	yes.
SBIC-431	The following statement was made in Singapore: I'd say a fitting punishment is dealing with the developmentally challenged children for the rest for your life .. Is the given statement hateful?	1	0	1	1	1	0	yes.
SBIC-1	The following statement was made in Singapore: Jason Donner‏: FBI Deputy Director Andrew McCabe has now been meeting with the House Intel Committee behind closed doors for more than seven hours.. Is the given statement hateful?	0	0	0	0	0	0	no.
SBIC-18	The following statement was made in Singapore: "As we loaded on the shuttle, our gate agent ran by our tarmac shuttle yelling ""where is the white plains plane parked?"" #lowconfidence". Is the given statement hateful?	0	0	0	0	0	0	no.
AU-Reddit-34	The following statement was made in Singapore: Anjappar in the HSBC building. Try their Egg Curry and Rice.. Is the given statement hateful?	0	0	0	0	0	0	no.
ZA-Reddit-59	The following statement was made in Singapore: You won't catch a boer in American overalls.. Is the given statement hateful?	0	0	0	0	0	0	no.
SBIC-309	The following statement was made in Singapore: Heard this from a 12 year old: 'Whats the difference between black people and apples?' I like apples. Is the given statement hateful?	1	1	1	1	1	1	yes.
SBIC-611	The following statement was made in Singapore: The Classic Mini Has Been Remastered With New Engines And Tech via @USER URL. Is the given statement hateful?	0	0	0	0	0	0	no.
SBIC-501	The following statement was made in Singapore: MeToo Movement Femoid Likens Being Hit on in Public to Being Mugged.. Is the given statement hateful?	1	1	0	1	1	1	yes.
SBIC-450	The following statement was made in Singapore: If one day you wake up as Chad, what would you do in order to become a successful person?. Is the given statement hateful?	0	0	0	0	0	0	no.
SBIC-409	The following statement was made in Singapore: I lived in texas when i was younger , i know how tough some things can get . `` rasslin animals '' is half the fun. Is the given statement hateful?	0	0	0	0	0	0	no.
SBIC-503	The following statement was made in Singapore: Mob boss: So, are you willing to kill women and children if necessary? “I’m a film major, I shoot disappointments for a living“. Is the given statement hateful?	0	0	1	0	0	1	no.
SBIC-597	The following statement was made in Singapore: Stop thinking they have to prove they self when they fucking with a community ass nigga Issa shooter. Is the given statement hateful?	1	1	1	1	1	1	yes.
GB-YouTube-20	The following statement was made in Singapore: @USER A pikey calling someone uneducated. The irony is painful 😂. Is the given statement hateful?	1	1	0	1	1	1	yes.
SBIC-243	The following statement was made in Singapore: Did you hear about the two car pile up in Mexico? 200 Mexicans died.. Is the given statement hateful?	1	1	1	1	0	0	no.
SBIC-293	The following statement was made in Singapore: Got banned from r/Aspergers for throwing red pills at them AHAHAHAHAHAHAHAHA GET FUCKED, SPERGS. Is the given statement hateful?	1	1	1	1	0	1	yes.
AU-Reddit-55	The following statement was made in Singapore: These cunts getting one cent of taxpayers money for their brainwashing is some bullshit. Is the given statement hateful?	0	0	0	0	0	0	yes.
ZA-Reddit-0	The following statement was made in Singapore: As a rule-of-thumb, what monkeys eat is safe for humans. SA has a lot of monkeys.. Is the given statement hateful?	0	0	0	0	0	1	no.
SBIC-51	The following statement was made in Singapore: #cabinetreshuffle fricking hell Melusi Gigaba for finance minister???????? @USER @USER I'm shell shocked. Is the given statement hateful?	0	0	0	0	0	0	yes.
SBIC-21	The following statement was made in Singapore: "Edgy" means u get 2 complain about how persecuted you are for saying horrible things while u continue 2 face no consequences 4 saying them.. Is the given statement hateful?	0	0	0	0	0	0	no.
SBIC-186	The following statement was made in Singapore: Anerican Dream We were talking about the american dream in class and the teacher said to a german boy if he had a german dream. He said "We did but no-one liked it.". Is the given statement hateful?	0	0	0	0	0	0	no.
SBIC-598	The following statement was made in Singapore: Stupid kids of stupid liberals and stupid bitchs who are of stupid liberals and stupid Governments that are of stupid issues stupid stupid stupid stupid people who get out of jail just so they can go right back for more of there dumb Politcal issues idk what els to say but im the target of there repeated issues that fail.. Is the given statement hate…	1	1	1	0	1	1	yes.
ZA-Reddit-39	The following statement was made in Singapore: Who are/is the “terrorist” you’re referring to in the title. Is the given statement hateful?	0	0	0	0	0	0	no.
SBIC-945	The following statement was made in Singapore: what 's the difference between harry potter and jews ? harry escaped the chamber. Is the given statement hateful?	1	1	1	1	1	1	yes.
GB-Reddit-44	The following statement was made in Singapore: Its not like it was entirely unknown that these people weren't straight. It is always good to have this sort of queer history spotlighted more though.. Is the given statement hateful?	0	0	0	0	0	0	no.
SBIC-875	The following statement was made in Singapore: dead baby joke mom : " why are these scissors so sticky ? " son : " sorry , i cut something wet . " mom : what 'd you cut with scissors that was wet ? <repeat> " son : " an infant 's windpipe ". Is the given statement hateful?	0	0	0	0	0	0	yes.
ZA-Reddit-28	The following statement was made in Singapore: Hypothetically, what about calling the DA monkeys? No go I assume?. Is the given statement hateful?	0	0	0	0	1	0	yes.
ZA-YouTube-53	The following statement was made in Singapore: We want our rainbow back 😢 Eff is for gays, only gay people must vote eff.. Is the given statement hateful?	1	1	1	1	1	0	yes.
SBIC-247	The following statement was made in Singapore: Did you know there's an equation to calculate the rate of Jews who left concentration camps? Chimney length vs. wind speed.. Is the given statement hateful?	1	1	1	1	1	1	yes.
SBIC-31	The following statement was made in Singapore: "Personality" I just want to get a bat and bludgeon the face of the next female that utters this word.. Is the given statement hateful?	1	1	1	1	1	1	yes.
SBIC-629	The following statement was made in Singapore: There is no thread on r/thebluepill regarding RippedRichAndIncel's atomic black pill 🤔🤔🤔🤔🤔🤔🤔🤔🤔🤔. Is the given statement hateful?	0	0	0	0	0	0	no.
SG-YouTube-35	The following statement was made in Singapore: I am proud of sg policies. Bangla today, then PR then citizen . They are most likely muslims can help increase sg population and maintain the muslim ratio. Is the given statement hateful?	0	0	0	0	0	1	no.
SBIC-937	The following statement was made in Singapore: watch out for these foul hoes and flagrant niggas!. Is the given statement hateful?	1	1	1	1	1	1	yes.
SBIC-833	The following statement was made in Singapore: Why should you never rape elderly women? because sex is for procreation you fucking Heathen!. Is the given statement hateful?	1	0	1	1	1	0	yes.
SBIC-348	The following statement was made in Singapore: How to know if you're good at sports Your not good if your not black. Is the given statement hateful?	1	1	1	1	1	1	yes.
SBIC-374	The following statement was made in Singapore: I fucked a spastic the other day. Suffice it to say she had a good time. There was saliva coming out of her mouth and she had a hard time getting her words out.. Is the given statement hateful?	1	1	0	1	1	1	yes.
GB-Reddit-4	The following statement was made in Singapore: Taking this opportunity for a fag break before we're on! Not heard our entry yet. Is the given statement hateful?	0	0	0	0	0	0	no.
SBIC-750	The following statement was made in Singapore: What's black and blue, and doesn't like sex? The kid in my trunk.. Is the given statement hateful?	1	0	1	0	1	1	yes.
SG-Reddit-62	The following statement was made in Singapore: Has he seen how many Malay guys buy 4D and drink beer? LoL Fuckin hypocrite. Is the given statement hateful?	0	0	0	0	1	0	yes.
GB-YouTube-13	The following statement was made in Singapore: Love to Britain thats the path to follow. Massive economical immigrants taked as for asylum seekers will cause mayhem like in France please follow the path of Poland and Hungary.. Is the given statement hateful?	0	0	0	1	0	1	no.
SBIC-165	The following statement was made in Singapore: After watching the clip on "Mansplaining" I would like to introduce the term "Vaginapology" I believe this is self-explanatory.. Is the given statement hateful?	0	0	1	1	0	0	no.
SG-YouTube-56	The following statement was made in Singapore: The weird thing is his victimes are straight men not gay and he said he want to make them gay because he want them to be free from their monsters girlfriends. Is the given statement hateful?	1	0	1	0	1	1	yes.
SBIC-255	The following statement was made in Singapore: Do you want to know how a depressed person can beat depression quick? Just give them a chair and a rope, the depression will be gone in a matter of minutes!. Is the given statement hateful?	1	1	1	0	1	1	yes.
SBIC-695	The following statement was made in Singapore: What do you call a black man left hanging? a lynching victim. Is the given statement hateful?	1	1	1	1	1	1	yes.
SBIC-649	The following statement was made in Singapore: Today I found out what the world inferior really meant I was nothing compared to the highly nt group i was eating lunch with, absolutely nothing.. Is the given statement hateful?	0	0	0	0	0	0	no.
GB-YouTube-42	The following statement was made in Singapore: All immigrants lawyers are filthy rich .... Is the given statement hateful?	0	0	0	0	1	1	no.
SBIC-646	The following statement was made in Singapore: This why I am the way I am bc mfs is out of this world retarded &#128514;&#128514;. Is the given statement hateful?	0	0	0	0	0	0	yes.
AU-YouTube-63	The following statement was made in Singapore: This is how they work. They are domestic terrorists. They are taking over corporations world wide and nothing good will come of it.. Is the given statement hateful?	0	0	1	0	0	1	yes.
SBIC-155	The following statement was made in Singapore: A white man and a black man play hide and seek at night. Who has the advantage? The white man, as the cops are on his side.. Is the given statement hateful?	1	1	1	1	1	0	yes.
SBIC-346	The following statement was made in Singapore: How many shots does it take for a black guy to tap out? Twenty, apparently. Is the given statement hateful?	1	1	1	1	1	1	yes.
SBIC-400	The following statement was made in Singapore: I like my shoes like I like my women In the corner tied up. Is the given statement hateful?	1	1	1	1	1	0	yes.
SBIC-413	The following statement was made in Singapore: I really wish feminists would stop perpetuating gender roles like the fragile and feckless girl who faints over anything crude; or the hysterical and entitled woman who relies on a man's gentlemanly virtue to get what she wants.. Is the given statement hateful?	1	0	0	1	1	1	yes.
SBIC-924	The following statement was made in Singapore: that moment when you silence a mage and they start backpedalling and you just KNOW it's about to go down. Is the given statement hateful?	0	0	0	0	0	0	no.
SBIC-241	The following statement was made in Singapore: Did they try turning Stephen Hawking off and on again?. Is the given statement hateful?	0	0	1	0	0	0	no.
SBIC-341	The following statement was made in Singapore: How do you successfully advertise sleeping pills? You get Bill Cosby to sponsor you. Is the given statement hateful?	0	0	1	0	1	0	no.
SBIC-491	The following statement was made in Singapore: Life RT @USER: I'm not giving these hoes free meals so they can go lay up with the dude they can't get over. Nope.. Is the given statement hateful?	0	0	1	1	0	0	yes.
GB-YouTube-68	The following statement was made in Singapore: That tranny should SUE them for discrimination! Lesbians say a man CAN be a woman... so why CAN'T they be lesbian too? We "straight" men find all this lbgt infighting hilarious! 😂😂😂. Is the given statement hateful?	1	1	1	1	1	1	yes.
SG-Reddit-5	The following statement was made in Singapore: Looks like no one ever bothered to ask the atheists and agnostics what they thought about the homos and assumed they are all godless hedonists too.. Is the given statement hateful?	1	1	1	1	1	1	yes.
GB-Reddit-59	The following statement was made in Singapore: The gays, THEY STOLE THE RAINBOW FROM US.... such a gay complaint. Is the given statement hateful?	1	1	0	1	1	1	yes.
SBIC-674	The following statement was made in Singapore: What Do A Woman And A Bar Have In Common? Liq-Her In The Front, Poke Her In The Back.. Is the given statement hateful?	1	0	1	1	1	1	yes.
SG-YouTube-29	The following statement was made in Singapore: Singapore govt is always Tunggu, nanti and then mati 🤣. Is the given statement hateful?	0	0	0	0	0	0	no.
SBIC-93	The following statement was made in Singapore: @USER yeah that niggah played good, lowkey i wanted brazil to win. Is the given statement hateful?	1	0	1	1	0	1	yes.
SBIC-752	The following statement was made in Singapore: What's common between Newton and the kid i stabbed to death? Newton Died virgin.. Is the given statement hateful?	0	0	1	0	0	0	yes.
SBIC-700	The following statement was made in Singapore: What do you call a kid with no arms or legs? Names.. Is the given statement hateful?	1	1	0	1	1	0	no.
SBIC-468	The following statement was made in Singapore: Irony: Being put on trial for killing a homosexual but then swearing on a bible which tells you to kill gays (Leviticus 20:13). Is the given statement hateful?	1	1	0	1	1	1	no.
SG-YouTube-14	The following statement was made in Singapore: Singapore take note: China party central will take back the money that moved to Singapore from Hong Kong. It is Chinese money. Also stop making bad news about China. Is the given statement hateful?	0	0	0	0	0	0	no.
SBIC-549	The following statement was made in Singapore: People told me to stop inviting disabled people to my farm. Well, they're right. When I buried them, the vegetables didn't grow!. Is the given statement hateful?	1	1	1	1	1	1	yes.
SBIC-576	The following statement was made in Singapore: Seriously, you're not going to pay for her?. Is the given statement hateful?	0	0	0	0	0	0	no.
SG-Reddit-59	The following statement was made in Singapore: As a side note, disappointing that our local media names and hyperlinks terrorists like the Christchurch shooter.. Is the given statement hateful?	0	0	0	0	0	1	no.
SBIC-11	The following statement was made in Singapore: "@USER Pepsi is not alone, may be they are more direct but all of them turn politics into ""cool"" product then sell it for profit". Is the given statement hateful?	0	0	0	0	0	0	no.
SBIC-511	The following statement was made in Singapore: My daughter has gotten to the age where she asks me embarrassing questions about sex. Just this morning she asked me "is that the best you can do?". Is the given statement hateful?	0	0	0	0	0	0	no.
SG-YouTube-21	The following statement was made in Singapore: north korea vibe XD china and north korea are like twin commies. Is the given statement hateful?	1	0	1	1	0	1	no.
SBIC-531	The following statement was made in Singapore: No, I'm not telling anyone what their score is. Then it'll just turn into a contest for GamerGate to try to 'win'.. Is the given statement hateful?	0	0	0	0	0	0	no.
ZA-Reddit-73	The following statement was made in Singapore: This is sad that farmers ask for this. The fact that the fat cunts in the ANC is so obsessed with themselves that all the police are patrolling their houses.. Is the given statement hateful?	1	0	0	1	1	1	yes.
SBIC-218	The following statement was made in Singapore: Blacks can shoot , funny thing is they only seem to be able to hit the little innocent law abiding child , walking home from church to help take of their sick mother .. Is the given statement hateful?	1	1	1	1	1	1	yes.
SBIC-508	The following statement was made in Singapore: My bible says what applies to men applies to women so don't tell me it's a man's nature to cheat & they are weak,don't tell me that rubbish. Is the given statement hateful?	0	0	0	0	0	1	no.
SBIC-612	The following statement was made in Singapore: The Obama Era is the largest collection of treasonous acts upon this country, since it's founding.. Is the given statement hateful?	0	0	0	0	0	0	yes.
SBIC-544	The following statement was made in Singapore: Owens vs. Jericho is one of the most intense, one of the most longest built matches on this #Wrestlemania card. It shouldn't be on 2nd.. Is the given statement hateful?	0	0	0	0	0	0	no.
SBIC-792	The following statement was made in Singapore: What’s the difference between a women and a computer You can punch information into a computer. Is the given statement hateful?	1	1	1	1	1	1	no.
SBIC-973	The following statement was made in Singapore: why do so many people think teen boys only want sex?. Is the given statement hateful?	0	0	0	0	0	0	no.
GB-Reddit-50	The following statement was made in Singapore: Wait, the gays have infiltrated musical theatre as well now? /s. Is the given statement hateful?	1	1	1	1	1	1	no.
SBIC-626	The following statement was made in Singapore: The younger ones will say they are survivors because they were sperm in the men and eggs in the women .. Is the given statement hateful?	0	0	0	0	0	0	no.
SBIC-852	The following statement was made in Singapore: You know, Fortnite actually reminds of school You hop out the bus and shoot everyone you see.. Is the given statement hateful?	0	0	1	0	0	1	no.
SBIC-919	The following statement was made in Singapore: slow replies make me feel like a retard and I just want to put my foot through a wall... hjhdyhdhlgjdftilh. Is the given statement hateful?	0	0	0	1	0	0	no.
GB-Reddit-9	The following statement was made in Singapore: I rarely say cigarette I always say I'm going for a fag. Is the given statement hateful?	0	0	0	0	0	0	no.
SBIC-570	The following statement was made in Singapore: Richmond police just made a Kissyface it Leo.. Is the given statement hateful?	0	0	0	0	0	0	no.
SBIC-718	The following statement was made in Singapore: What do you do when you are done fucking the tightest pussy? You put it back in the womb.. Is the given statement hateful?	0	0	0	0	1	1	yes.
SBIC-921	The following statement was made in Singapore: some people say i do n't let my wife choose anything , but that 's not true ! i let her choose between front hand and back hand .. Is the given statement hateful?	0	1	1	0	0	0	no.
SG-YouTube-36	The following statement was made in Singapore: @USER chibai you eat babi at hawker centre, they got put headcover anot. Is the given statement hateful?	0	0	0	1	0	1	yes.
SBIC-542	The following statement was made in Singapore: Only snowflake libtards believe anything that scumbag wrote in his crappy book!. Is the given statement hateful?	1	1	1	1	0	1	yes.
GB-YouTube-58	The following statement was made in Singapore: Who’s Davis? The ladyboy with the Botox eyebrows? Why can’t she accept herself as she is - an old woman with 2 trensticles. And s(he) is mocking her fellow shemales.. Is the given statement hateful?	1	1	1	1	1	1	yes.
ZA-Reddit-62	The following statement was made in Singapore: The Boers gave them a good run for their money on biltong and rusks. Edit : /s just in case.. Is the given statement hateful?	0	0	0	0	0	0	no.
SBIC-748	The following statement was made in Singapore: What's better than a gold medal at the Paralympics? Legs. Is the given statement hateful?	1	1	1	1	0	1	no.
SG-YouTube-12	The following statement was made in Singapore: Boy..what a question is that…u can do nothing about it can u…India too can have its own map that irritates china ..and china can do nothing about it.. Is the given statement hateful?	0	0	0	0	0	0	no.
AU-YouTube-58	The following statement was made in Singapore: The lgbtq+ don’t accept pedophiles but nice try. Provide some evidence if i am wrong. Is the given statement hateful?	0	0	0	0	0	0	no.
ZA-Reddit-1	The following statement was made in Singapore: It’s because they’re being trained in Pretoria by Jews to be [snipers](URL). Is the given statement hateful?	0	0	0	1	0	0	yes.
SG-Reddit-53	The following statement was made in Singapore: can we also add that rsaf hougang knocking sound making person a terrorist too?. Is the given statement hateful?	0	0	1	1	0	0	no.
SG-YouTube-32	The following statement was made in Singapore: In time to come, mainland Chinese would be considered like pariahs, given the CCP mismanagement of Wuhan virus. CCP refuse to cooperate with the world on transparency of information. Is the given statement hateful?	0	0	0	0	0	0	yes.
SBIC-847	The following statement was made in Singapore: You CUCKS and Patriots....and my Brothers.....UNITE....ITS TIME !. Is the given statement hateful?	0	0	0	0	0	0	yes.
SBIC-652	The following statement was made in Singapore: Totally different if I was prepping a meal for him. But y'all on something else if imma reach across he table to cut his chicken.... Is the given statement hateful?	0	0	0	0	0	0	no.
SBIC-192	The following statement was made in Singapore: Are you guys tired of being lumped in with rich old white men in politics and in business, while you toil away and live from paycheck to paycheck?. Is the given statement hateful?	1	0	0	1	1	1	no.
SBIC-673	The following statement was made in Singapore: Well, if the Ambassadors won't hang Trump's picture maybe we should just hang the Ambassadors.. Is the given statement hateful?	1	0	1	1	1	1	yes.
SBIC-350	The following statement was made in Singapore: How's America like the Dark Knight Trilogy? No one gives a fuck about Harvey.. Is the given statement hateful?	0	0	0	0	0	0	no.
SBIC-316	The following statement was made in Singapore: Hitler just suck at running He cant even finish a race. Is the given statement hateful?	1	1	1	1	0	1	yes.
GB-Reddit-65	The following statement was made in Singapore: I guess the story of the little Dutch boy who stuck his finger in the dyke/dijk wouldn't be acceptable then.. Is the given statement hateful?	0	0	0	0	1	0	no.
SBIC-819	The following statement was made in Singapore: Why do Puerto Ricans hang the Puerto Rican flag in their car? So they dont steal from each other.. Is the given statement hateful?	1	1	1	1	1	1	yes.
SBIC-614	The following statement was made in Singapore: The body of Mollie, the missing Iowa student, has been found. She was chopped Tibbetts.. Is the given statement hateful?	0	0	0	0	0	1	yes.
SBIC-305	The following statement was made in Singapore: Have you guys seen the new study from BOFA?. Is the given statement hateful?	0	0	0	0	0	0	no.
SBIC-174	The following statement was made in Singapore: All the jews I have ever known will do anything for money , and all I can say is there are no good jews. Is the given statement hateful?	1	1	1	1	1	1	yes.
GB-Reddit-6	The following statement was made in Singapore: Can't beat chips done in the Ninjja foodie. Also if you can't taste the difference in the variety of tatties you must smoke 60 fags a day and gargle with bleach.. Is the given statement hateful?	0	0	0	0	0	1	no.
SBIC-494	The following statement was made in Singapore: Maichard and DTBY give us a roller coaster ride of emotions. That is why we love them. #ALDUBKSGoesToUS. Is the given statement hateful?	0	0	0	0	0	0	no.
GB-YouTube-46	The following statement was made in Singapore: @USER i dont eat frogs anyway so fuck em. Is the given statement hateful?	0	0	0	0	0	0	yes.
SBIC-680	The following statement was made in Singapore: What did Hitler tell the jews when they can't solve a riddle. take a gas. Is the given statement hateful?	1	1	1	1	1	1	yes.
SBIC-725	The following statement was made in Singapore: What does life and a box of chocolates have in common? It doesn't last as long if you're fat.. Is the given statement hateful?	1	1	1	1	0	0	yes.
AU-Reddit-8	The following statement was made in Singapore: If an Asian guy wants to call his burger a ching chong burger then let him.. Is the given statement hateful?	1	1	1	1	0	1	yes.
SBIC-877	The following statement was made in Singapore: fat bitches fat bitches heeeey. Is the given statement hateful?	0	1	0	0	0	1	yes.
ZA-Reddit-54	The following statement was made in Singapore: "Kill the Boer" is blatant hate speech and Americans should focus on their own problems.. Is the given statement hateful?	0	0	0	0	1	0	yes.
SBIC-616	The following statement was made in Singapore: The fat acceptance movement is the only movement without movement. Is the given statement hateful?	1	1	1	1	1	1	no.
AU-Reddit-38	The following statement was made in Singapore: Curry n cask in corinda is the best.. Is the given statement hateful?	0	0	0	0	0	0	no.
SBIC-743	The following statement was made in Singapore: What were the best r/pussypassdenied moments in your life?. Is the given statement hateful?	0	0	0	0	0	1	no.
SBIC-265	The following statement was made in Singapore: Everyone in this thread is sick for making dark jokes! I just got my 7 year old judaism converted autistic paraplegic daughter pregnant insted of my dead one cause I was busy laughing while having a threesome.. Is the given statement hateful?	1	1	1	0	1	1	yes.
SBIC-733	The following statement was made in Singapore: What is the difference between a crucifixion and a circumcision? In a crucifixion, they throw out the whole Jew.. Is the given statement hateful?	1	1	1	1	1	1	yes.
SBIC-418	The following statement was made in Singapore: I think that it is fair to say that the National Alliance is a secular organization that has taken a specific stance against multicultural Christianity for political reasons and has also had prominent members who have promoted non-Christian religions or spiritual paths .. Is the given statement hateful?	0	0	0	0	0	0	no.
SBIC-731	The following statement was made in Singapore: What is black and sits on the top of the stairs A cripple in a house fire. Is the given statement hateful?	1	1	1	1	1	1	yes.
SBIC-198	The following statement was made in Singapore: Asking north Korea not to make nuclear weapons is a bit like asking an Audi driver not to drive too close to the car in front.. Is the given statement hateful?	0	0	1	0	1	0	no.
SBIC-818	The following statement was made in Singapore: Why did the sun never set on the British Empire? Even God didn't trust the English in the dark.. Is the given statement hateful?	1	1	1	1	1	1	yes.
ZA-YouTube-10	The following statement was made in Singapore: You’d swear white people are a living Satan the way they resold in this comment section. They act like devils or possessed. Is the given statement hateful?	1	1	1	1	1	1	yes.
SBIC-610	The following statement was made in Singapore: That was two girls!. Is the given statement hateful?	0	0	0	0	0	0	no.
SBIC-336	The following statement was made in Singapore: How do you get a Korean dad to let you date his daughter? Don't be black.. Is the given statement hateful?	1	1	1	1	1	1	yes.
SG-Reddit-66	The following statement was made in Singapore: Assalamualaikum my name is Imran..here's how i donated $450 to a terrorist group with my passive income!. Is the given statement hateful?	0	0	1	0	0	0	yes.
SBIC-159	The following statement was made in Singapore: According to evolution, all human beings came from apes Except for Indians, they came from rapes.. Is the given statement hateful?	1	1	1	1	1	1	yes.
SBIC-569	The following statement was made in Singapore: Researchers found out the most important difference between humans and apes Apes lives in Africa. Is the given statement hateful?	1	1	1	1	1	1	no.
SBIC-735	The following statement was made in Singapore: What is worse than finding a worm in your apple? AIDS. Is the given statement hateful?	0	0	0	0	0	0	yes.
ZA-Reddit-47	The following statement was made in Singapore: Coconut worms. Delicious.. Is the given statement hateful?	0	0	0	0	0	0	no.
SBIC-967	The following statement was made in Singapore: when she wants to date you but shes ugly and fat. Is the given statement hateful?	0	0	1	0	1	0	yes.
SBIC-478	The following statement was made in Singapore: Just read about the Heroes 2.0 Mastery Taunts. How often do you ever have time to taunt in Heroes of the Storm?? What a stupid edition. Is the given statement hateful?	0	0	0	0	0	0	no.
SBIC-789	The following statement was made in Singapore: What’s the best thing about having sex with 21 year olds? There’s 20 of em. Is the given statement hateful?	0	0	1	0	0	0	yes.
SBIC-167	The following statement was made in Singapore: Agreed, The Blacks and Hispanics should have their own school only for them and have worse education than the children whites like that might not compete with our children whites .. Is the given statement hateful?	1	1	1	1	1	1	yes.
SBIC-914	The following statement was made in Singapore: oh look that's another reason to fucking hate my shit-ass group. Is the given statement hateful?	0	0	0	0	0	1	yes.
SBIC-736	The following statement was made in Singapore: What martial arts type was hitler scared of? jewjitsu. Is the given statement hateful?	1	1	1	1	1	1	yes.
SG-Reddit-74	The following statement was made in Singapore: prc man forgot his bing qi ling. Is the given statement hateful?	0	0	1	0	0	0	no.
SBIC-92	The following statement was made in Singapore: @USER too bad hes a faggot. Is the given statement hateful?	1	1	1	1	1	0	yes.
SBIC-864	The following statement was made in Singapore: a jew , a mexican and a black guy walk into the bar . <repeat> the bartender pulls out his gun and says " get the fuck outta here ". Is the given statement hateful?	1	1	1	1	0	1	yes.
SBIC-188	The following statement was made in Singapore: Another good match, would have meant more if it was her first title match win , but still good finish with the elbow drop #Wrestlemania. Is the given statement hateful?	0	0	0	0	0	0	no.
SBIC-507	The following statement was made in Singapore: My German girlfriend likes to rate our sex between 1-10. Last night we tried anal, she kept shouting 9! That's the best I've done so far.. Is the given statement hateful?	0	0	0	0	0	0	no.
SBIC-927	The following statement was made in Singapore: the blacks and special needs are cursed with ? tardiness. Is the given statement hateful?	1	1	1	1	1	1	yes.
ZA-YouTube-27	The following statement was made in Singapore: Before you guys forget, kiss the boer kiss the farmer, we will sing it and make it amapiano. Is the given statement hateful?	0	0	0	0	1	0	no.
GB-Reddit-27	The following statement was made in Singapore: the chippy, stella, crackhead piss and stale fags. Is the given statement hateful?	1	1	0	0	1	1	no.
ZA-YouTube-22	The following statement was made in Singapore: Why cant they sing love the boer? It is not about freedom it is about unity! It does stir violence. They are provoking violence. The boer will defend themselves.. Is the given statement hateful?	0	0	0	0	0	0	yes.
SBIC-600	The following statement was made in Singapore: Swedish proposal for legal paternal surrender (LPS) gets major support in /r/news!. Is the given statement hateful?	0	0	0	0	0	0	no.
SBIC-210	The following statement was made in Singapore: Black People are functional members of society. Lock this post if you agree. Is the given statement hateful?	0	0	0	0	0	1	no.
SBIC-14	The following statement was made in Singapore: "@USER: Sad knowing that most hoes won't fuck with you bc you ain't got stacks." wait till friday. Is the given statement hateful?	1	1	1	0	1	1	yes.
SBIC-696	The following statement was made in Singapore: What do you call a black midget in Ireland. A leprecoon.. Is the given statement hateful?	1	1	1	1	1	1	yes.
SBIC-318	The following statement was made in Singapore: Hitler was a good doctor. He cured tons of disabilities.. Is the given statement hateful?	1	1	1	1	0	1	no.
SBIC-339	The following statement was made in Singapore: How do you start a rave in Africa? You staple a piece of bread to the ceiling. Is the given statement hateful?	1	1	1	1	1	1	no.
SBIC-740	The following statement was made in Singapore: What should you never give a dyslexic person for breakfast? Alpha-bits. Is the given statement hateful?	1	1	1	0	1	1	no.
SBIC-60	The following statement was made in Singapore: &#8220;@USER: When hoes feel like their photo didnt get enough favorites URL;. Is the given statement hateful?	0	0	1	0	0	0	no.
AU-Reddit-13	The following statement was made in Singapore: Being a real estate agent requires no education and is everyone's fallback job. Are you really surprised that they're cunts? They're just being them.. Is the given statement hateful?	0	0	0	0	0	1	yes.
SBIC-510	The following statement was made in Singapore: My dad has always told me back in his day you had to walk uphill both ways through a foot of snow to get to school That ain’t nothing. My generation has to walk through open fire.. Is the given statement hateful?	0	0	0	0	0	0	no.
SBIC-895	The following statement was made in Singapore: i named my son michael simon albert timothy charles brian kevin andrew nicholas frederick anthony donald victor alfonse lawrence theodore stephen william jacob alexander richard benjamin arthur daniel aidan lucas john oliver david sebastian henry ryan julian evan cameron dominic leonardo . <repeat> . <repeat> ut the little fucker still did n't drown …	0	0	0	0	0	1	yes.
ZA-YouTube-65	The following statement was made in Singapore: Russia on the border of Ukraine. Jews vs Christians and Muslims in Jerusalem. Chinese want to take Tawian back , difficulty with Australia as well. Stay safe all.. Is the given statement hateful?	0	0	0	0	0	0	no.
GB-Reddit-38	The following statement was made in Singapore: I used to work as a barman in the ‘Washington’ Llandudno, it was gay night every Thursday, and it was always packed. There’s a lot of gays up north, they’re just spread out everywhere.. Is the given statement hateful?	0	0	0	0	0	0	no.
GB-Reddit-60	The following statement was made in Singapore: I'm queer, and i've never said "yass" in place of "yes".. Is the given statement hateful?	0	0	0	0	0	0	no.
SBIC-963	The following statement was made in Singapore: what s the main cause of paedophilia sexy kids. Is the given statement hateful?	1	0	1	0	1	1	yes.
ZA-YouTube-58	The following statement was made in Singapore: no one cares... Long live Uganda !!! Stand strong Africa. Protect the children from the rainbow mafia. 🫡. Is the given statement hateful?	1	0	1	1	0	1	yes.
SBIC-831	The following statement was made in Singapore: Why is the camel called the ship of the desert? Because it’s filled with Arab seamen. Is the given statement hateful?	1	1	1	1	0	1	yes.
SBIC-588	The following statement was made in Singapore: So, water is actually heavier than liquefied dino-dong .. Is the given statement hateful?	0	0	0	0	0	0	no.
SBIC-873	The following statement was made in Singapore: black people are like tires they work better with chains. Is the given statement hateful?	1	1	1	1	1	1	yes.
SG-Reddit-60	The following statement was made in Singapore: This post would be more appropriate in r/Islam. Standard answer to this would be to break up. Bf gf relationship is haram, doubly so with a freethinker.. Is the given statement hateful?	0	0	1	0	1	0	no.
SG-YouTube-43	The following statement was made in Singapore: @USER Since when Singapore belong to Chinese? If so why do we have Malay and Indian MPs?. Is the given statement hateful?	0	0	0	0	0	0	yes.
SBIC-211	The following statement was made in Singapore: Black Student:: Yeah man us Black people don't do too well in water. White student:: Yeah, yall took advantage of that free boat ride huh? An exchange my friend who attends Lake Forest College overheard.. Is the given statement hateful?	1	1	1	1	1	1	yes.
GB-YouTube-71	The following statement was made in Singapore: What a joke. All these queers are not getting along. The whole idealogy is sinful & disgusting. These are totally confused people, so no wonder there is chaos within their ranks.. Is the given statement hateful?	1	1	1	1	1	1	yes.
AU-Reddit-40	The following statement was made in Singapore: IGA in Royal St, East Perth serves delicious takeaway curry/Indian food in containers.. Is the given statement hateful?	0	0	0	0	0	0	no.
SBIC-670	The following statement was made in Singapore: We have enslaved entire species of animals because we think that they are cute... but I kidnap one cute schoolgirl and the nation goes mad!. Is the given statement hateful?	0	0	0	1	0	1	yes.
SBIC-775	The following statement was made in Singapore: What's the worst part about being a black Jew? You have to sit at the back, of the oven. Is the given statement hateful?	1	1	1	1	1	1	yes.
GB-YouTube-24	The following statement was made in Singapore: Show your audience them Ukrainian nazis. Is the given statement hateful?	1	1	1	1	1	1	yes.
SG-YouTube-40	The following statement was made in Singapore: @USER oh really? Then explain why chinese ethnics cannot buy lands in Jogjakarta?. Is the given statement hateful?	0	0	0	0	0	0	yes.
SBIC-707	The following statement was made in Singapore: What do you call a white girl that can run faster than her brothers? The redneck virgin. Is the given statement hateful?	1	1	1	1	0	1	yes.
ZA-Reddit-63	The following statement was made in Singapore: > Turns out Conor McGregor was a South African army general during the Boer War. Picture from the 30s: FTFY. I think.. Is the given statement hateful?	0	0	0	0	0	0	no.
SBIC-637	The following statement was made in Singapore: Things Chad doesn't have to deal with or worry about Getting cheated on Getting laid Not getting any matches on Tinder Having to message first Having to be confident Having to ask any girl out Getting attention or validation Getting invited to parties Care to add more?. Is the given statement hateful?	0	0	0	1	0	0	yes.
AU-YouTube-18	The following statement was made in Singapore: Key findings: There's no curry restaurant on the Moon (soon to change). They'll call the franchise the Luney Indian.. Is the given statement hateful?	0	0	0	1	1	0	no.
SBIC-685	The following statement was made in Singapore: What did the kid with down syndrome get in his test? 47/46. Is the given statement hateful?	1	1	1	1	1	1	no.
GB-Reddit-58	The following statement was made in Singapore: Morgan freeman: there were, in fact, many gays.. Is the given statement hateful?	0	0	1	0	0	1	no.
SBIC-367	The following statement was made in Singapore: I don't think Tucker realized how bad it is and Andrew presented the case well!. Is the given statement hateful?	0	0	0	0	0	0	no.
SBIC-946	The following statement was made in Singapore: what 's the meanest thing you can do to a blind person ? give them a cheese grater to read .. Is the given statement hateful?	1	1	1	1	1	1	yes.
SBIC-658	The following statement was made in Singapore: Ugh, I can't. @USER Nothing quite as degrading as a man using a feather duster. #GenderRoleShock #NotSexist #JustManly. Is the given statement hateful?	0	0	1	0	0	1	yes.
AU-YouTube-31	The following statement was made in Singapore: By giving the Islamic council access to the Taliban they will inspire more terrorist activities here in Australia, it's reckless and it's a dumb idea. Is the given statement hateful?	1	0	1	0	1	1	no.
SBIC-753	The following statement was made in Singapore: What's even worse than black men? Black women feminists.. Is the given statement hateful?	1	1	1	1	1	1	yes.
GB-YouTube-60	The following statement was made in Singapore: @USER What? Most of Europe is just as or more accepting of queer people than the US are.... Is the given statement hateful?	0	0	0	0	0	0	no.
SG-Reddit-76	The following statement was made in Singapore: That's why either conscript everyone or conscript no one. Ah gua have always had these problems in NS. Even 新兵小传 highlighted this decades ago. It's not nice for them, many killed themselves.. Is the given statement hateful?	0	0	0	0	0	1	no.
GB-YouTube-64	The following statement was made in Singapore: Why is he only mentioning gays and lesbians? Why is he ignoring the b, q, double spirit and 75 other groups? I am offended on their behalf?. Is the given statement hateful?	0	0	0	0	0	0	no.
SG-Reddit-25	The following statement was made in Singapore: Ah Tiong don’t work as construction labourer already. The pay not enough to bring them over. Most probably are supervisors. Is the given statement hateful?	0	0	0	0	0	0	no.
SBIC-300	The following statement was made in Singapore: Hahaha, you're so funny! You're not asexual! There's no such thing! Humans are MADE for sex! You just haven't had GOOD sex yet! Someday you'll meet the right guy and you'll want to screw his brains out, and then you'll remember how insane you were to ever say you're asexual!. Is the given statement hateful?	1	1	0	1	1	0	no.
SBIC-399	The following statement was made in Singapore: I like my grilled cheese like how I like my Vietnamese villagers. Yellow and Melted.. Is the given statement hateful?	1	1	1	1	1	1	no.
ZA-YouTube-26	The following statement was made in Singapore: This song really escalate violence,the meaning is clear,no translation needed,if the Boers can call us Kafirs are we gonna be happy,being called that?. Is the given statement hateful?	0	0	0	1	0	0	yes.
SBIC-788	The following statement was made in Singapore: What’s the best thing about fucking a 5 year old girl? You can flip her over and pretend she’s a 5 year old boy.. Is the given statement hateful?	1	1	1	1	1	1	yes.
SBIC-916	The following statement was made in Singapore: one. collage. texture + sound + color. How it moves. Why it moves. moments form image. what stories are we telling?. Is the given statement hateful?	0	0	0	0	0	0	no.
GB-YouTube-38	The following statement was made in Singapore: What’s the problem? It’s called capitalism………supply and demand! If it wasn’t for plucky immigrants you won’t get your pizza. Leave them alone, you Brexit Bullies!. Is the given statement hateful?	0	0	0	0	1	0	no.
SBIC-783	The following statement was made in Singapore: Whats the hardest bit about eating a vegtable? The wheelchair. Is the given statement hateful?	1	1	1	1	1	1	yes.
ZA-YouTube-41	The following statement was made in Singapore: Even the boers thought we were domkops until June 16 happened and there was no turning back!. Is the given statement hateful?	0	0	1	1	0	0	no.
SG-Reddit-75	The following statement was made in Singapore: If you like a guy, is it considered gay?. Is the given statement hateful?	0	0	0	0	0	0	no.
AU-Reddit-74	The following statement was made in Singapore: This thread reinforces that Sydney is full of entitled cunts who all think they are right.. Is the given statement hateful?	0	0	0	0	1	1	yes.
SBIC-518	The following statement was made in Singapore: My girlfriend called me a pedophile. I never knew 1 years old could talk. Especially with a dick in the mouth.. Is the given statement hateful?	1	1	1	0	0	1	yes.
SBIC-406	The following statement was made in Singapore: I like my women like i lile my whiskey 12 years old and brown.. Is the given statement hateful?	1	1	1	1	1	0	yes.
AU-Reddit-10	The following statement was made in Singapore: They knew they were doing the wrong thing, but they'd already decided to do it, so they found a way to justify it to themselves. Stupid, selfish cunts. Everyone on that boat deserves an uppercut.. Is the given statement hateful?	0	0	0	0	1	0	yes.
SBIC-764	The following statement was made in Singapore: What's the difference between a feminist and a cry baby? A cry baby stops crying when it grows up.. Is the given statement hateful?	1	1	1	1	1	1	yes.
AU-YouTube-48	The following statement was made in Singapore: DEATH TO THE PALE SOUTH AFRICAN CUNT WHORE INVADERS!. Is the given statement hateful?	1	1	1	1	1	1	yes.
SBIC-573	The following statement was made in Singapore: Secret Language During the holocaust the Jews had a secret language they used to speak... it went something like this, "OH MY GOD! I'M BURNING ALIVE". Is the given statement hateful?	1	1	1	1	1	1	yes.
GB-YouTube-5	The following statement was made in Singapore: The illegal immigrants are far smarter than the Irish Government.. Is the given statement hateful?	0	0	1	0	0	0	no.
SG-YouTube-28	The following statement was made in Singapore: This 3 January Malaysia close border to China tourist... Is the given statement hateful?	0	0	0	0	0	0	no.
SBIC-625	The following statement was made in Singapore: The therapy ads in the banner are, unsurprisingly, a scam.. Is the given statement hateful?	0	0	0	0	0	0	no.
SBIC-279	The following statement was made in Singapore: Fighting fire with fire is not the fucking answer!!! @USER #usairstrike #helpsyria #stopfightingfirewithfire #Airstrikes. Is the given statement hateful?	0	0	0	0	0	0	no.
SBIC-506	The following statement was made in Singapore: Murder is one sure way to live longer than other people.. Is the given statement hateful?	0	0	0	0	1	0	no.
SBIC-298	The following statement was made in Singapore: HONESTY HOUR: like this post and I'll dm you a name and you gotta quote the tweet and be honest about how you feel about them &#128064;&#128539;. Is the given statement hateful?	0	0	0	0	0	0	no.
SBIC-693	The following statement was made in Singapore: What do u do after raping Helen Keller? Break her fingers so she can't tell. Is the given statement hateful?	1	1	1	1	1	1	yes.
SBIC-960	The following statement was made in Singapore: what is the german translation of ' harry potter and the chamber of secrets ? " harry hitler and the chamber of gas .. Is the given statement hateful?	1	1	1	1	1	1	yes.
SG-Reddit-44	The following statement was made in Singapore: Yes i get that gay meant happy lol. Is the given statement hateful?	0	0	0	0	0	0	no.
GB-YouTube-29	The following statement was made in Singapore: Brits are just jealous. All these immigrants are highly educated and hard working. They are putting lazy British to shame. Is the given statement hateful?	1	1	0	1	0	1	no.
SBIC-653	The following statement was made in Singapore: Trade free follows 200x200 or less I don't go first liars get blocked & reported team up 30x30 tweet me &#128123;. Is the given statement hateful?	0	0	0	0	0	0	no.
SBIC-101	The following statement was made in Singapore: @USER I eat dat chicken out your love box baby. Lovin a white woman while eatin chicken. A colored mans dream. Is the given statement hateful?	0	0	0	1	0	0	yes.
SBIC-711	The following statement was made in Singapore: What do you call an autistic child after they’ve been hit by a car? Mashed potatoes. Is the given statement hateful?	1	1	1	1	1	1	yes.
SG-YouTube-47	The following statement was made in Singapore: Not when u have terrorists groups breeding like crazy….. they are overwhelming the progressing and peace loving malays now.. Is the given statement hateful?	1	0	1	1	1	1	yes.
SBIC-631	The following statement was made in Singapore: There should be a modernized version of "The Boy Who Cried Wolf" called "The Girl Who Cried Rape". Is the given statement hateful?	1	1	1	1	1	1	no.
SBIC-323	The following statement was made in Singapore: How are people with mental disabilities similar to electronic products? Sometimes they are, "batteries not included". Is the given statement hateful?	1	1	1	1	1	1	no.
ZA-YouTube-63	The following statement was made in Singapore: @USER Hamas is like our ANC back in the day. They are not terrorists. ISIS is a terrorist org. Not Hamas they are the only source of defence. Is the given statement hateful?	0	0	0	0	0	0	no.
SBIC-74	The following statement was made in Singapore: *jumps up and down because I cannot wait to get to it and for @USER to destroy me emotionally*. Is the given statement hateful?	0	0	0	0	0	0	no.
ZA-Reddit-60	The following statement was made in Singapore: The AI knew to give a boer seun a Mauser.. Is the given statement hateful?	0	0	0	0	0	0	no.
SBIC-970	The following statement was made in Singapore: why are blacks the most common users of vine ? because it brings them back to when they were swinging on the vines <number> years ago .. Is the given statement hateful?	1	1	1	1	1	1	yes.
SBIC-661	The following statement was made in Singapore: User talks about his perspective on being a young parent. Is the given statement hateful?	0	0	0	0	0	0	no.
ZA-YouTube-46	The following statement was made in Singapore: @USER yeah,I’m having a threeway with Satan and Lucifer. Is the given statement hateful?	0	0	0	0	0	0	no.
SBIC-493	The following statement was made in Singapore: Look, the only live action Disney remake I want is the Emperor’s New Groove and I want there to be no CGI. Is the given statement hateful?	0	0	0	0	0	0	no.
SBIC-870	The following statement was made in Singapore: anybody that shitted on me, I ain't fucking with none of ya!!!!. Is the given statement hateful?	0	0	0	0	0	0	no.
SG-Reddit-43	The following statement was made in Singapore: Why not get the best of both world? Marry a tranny?. Is the given statement hateful?	1	1	1	1	1	1	no.
SBIC-640	The following statement was made in Singapore: This is the 4th act of Leftist terrorism on Trump's supporters since his election -Tennessee Church shooting -Vegas Massacre -Republican Senate baseball game shooting -Texas Church shooting RICO Antifa, Soros, BLM. Is the given statement hateful?	1	1	1	1	0	0	yes.
SBIC-760	The following statement was made in Singapore: What's the difference between Santa and the Jews? Santa goes down the chimney.. Is the given statement hateful?	1	1	1	1	0	1	yes.
SBIC-49	The following statement was made in Singapore: #Hyères #footjob throat #sexo #uniforms #planq #incall #chatroom blowjob #kikhorny #dirty URL. Is the given statement hateful?	0	0	0	0	0	0	no.
SBIC-26	The following statement was made in Singapore: "Is that an albino Mexican?" "No dad, he's Asian.". Is the given statement hateful?	1	1	1	1	0	1	no.
SBIC-177	The following statement was made in Singapore: Also, I can't imagine anything more counterproductive than getting into fights with shit-tier niggers and other diversity when those aren't the people who have socially engineered the destruction of your homeland.. Is the given statement hateful?	1	1	1	1	1	1	yes.
GB-Reddit-16	The following statement was made in Singapore: Dear Americans, When we ask if we can “bum a fag”, it’s not what you think it is. When we say something about a “fanny”, you’re only a few inches out.. Is the given statement hateful?	0	0	0	0	1	0	no.
SBIC-407	The following statement was made in Singapore: I like you, you don't act gay.. Is the given statement hateful?	1	1	1	1	1	0	yes.
SG-Reddit-67	The following statement was made in Singapore: I knew it, of course Imran is a terrorist.. Is the given statement hateful?	1	1	1	0	1	1	yes.
SBIC-79	The following statement was made in Singapore: 12 Computer Technicians Share The Weirdest Thing Theyve Found On A Customers Computer. URL. Is the given statement hateful?	0	0	0	0	0	0	no.
SBIC-751	The following statement was made in Singapore: What's black yellow and blurry? A bus full of niggers rolling down a hill. Is the given statement hateful?	1	1	1	1	1	1	yes.
SBIC-581	The following statement was made in Singapore: Sitting in the car is a date, watching movies is a date, laying in bed is a date. A date doesn't require your wallet only you're time&#128149;. Is the given statement hateful?	0	0	0	0	0	0	no.
SG-YouTube-45	The following statement was made in Singapore: @USER We do have Malays in Airforce or Navy. Just fewer.. Is the given statement hateful?	0	0	0	0	0	0	no.
ZA-Reddit-69	The following statement was made in Singapore: So when do the sing kill the boer in this video ?. Is the given statement hateful?	0	0	1	0	0	0	yes.
SBIC-894	The following statement was made in Singapore: i like wanking whilst looking at myself in the mirror . my driving instructor does n't .. Is the given statement hateful?	0	0	0	0	0	0	yes.
SBIC-923	The following statement was made in Singapore: still fucking fumin we drew against Bourneshite, cant wait to get molested at Britannia tmrw. Is the given statement hateful?	0	0	0	0	0	1	yes.
ZA-YouTube-8	The following statement was made in Singapore: America is terrorists. Is the given statement hateful?	1	1	0	1	1	1	yes.
SBIC-741	The following statement was made in Singapore: What the difference between jelly and jam? I can't jelly my dick into an 8 year old.. Is the given statement hateful?	0	0	1	0	1	0	yes.
ZA-Reddit-64	The following statement was made in Singapore: See it this way. If the word boer was replaced with a religious, ethnic, or social group would it be seen as okay to sing? Would it even be a debate?. Is the given statement hateful?	0	0	0	0	0	0	no.
SBIC-382	The following statement was made in Singapore: I had no idea that Alabama had this many retarded Democrats in it!. Is the given statement hateful?	1	1	1	1	1	1	yes.
ZA-Reddit-32	The following statement was made in Singapore: Are they looking for ISIS terrorists?. Is the given statement hateful?	0	0	0	0	0	0	no.
ZA-Reddit-57	The following statement was made in Singapore: I wonder when people will recognize the EFF for what it really is. It's not a political party, it's a terrorist organization.. Is the given statement hateful?	0	0	0	0	1	0	yes.
ZA-Reddit-4	The following statement was made in Singapore: Hotnot is the insult. Is the given statement hateful?	0	0	0	0	0	0	no.
AU-YouTube-54	The following statement was made in Singapore: Of course he supports all terrorists. Is the given statement hateful?	1	0	1	0	1	1	yes.
SBIC-245	The following statement was made in Singapore: Did you know that Germany came up with sparkling water Who else would think of adding gas.. Is the given statement hateful?	1	1	1	1	1	1	no.
SBIC-13	The following statement was made in Singapore: "@USER: bitches can't cook but know how to suck dick .." s/o to the ones that can do both!. Is the given statement hateful?	1	1	1	1	1	0	yes.
SBIC-708	The following statement was made in Singapore: What do you call a white girl who’s faster than her brothers? A redneck virgin. Is the given statement hateful?	1	1	1	1	1	1	yes.
ZA-YouTube-12	The following statement was made in Singapore: He's right. I have to work with Boers in Australia and they deserve anything they get.. Is the given statement hateful?	1	1	1	0	0	1	yes.
SBIC-538	The following statement was made in Singapore: Oh my God! Yea, that shooting at Haas last week was so crazy! I feel like I go to a ghetto school now!. Is the given statement hateful?	0	0	0	1	0	1	no.
GB-YouTube-31	The following statement was made in Singapore: It doesn’t lol, not when most immigrants that people are angry about are the dinghy scroungers. Is the given statement hateful?	1	1	1	1	1	1	yes.
SBIC-332	The following statement was made in Singapore: How do you become the most popular kid in school? You shoot it up.. Is the given statement hateful?	0	1	0	0	1	0	yes.
AU-Reddit-36	The following statement was made in Singapore: I want to know what's in the green file. Curry + accounting on a Wednesday night?. Is the given statement hateful?	0	0	0	0	0	0	no.
