# Supplementary material
Source: ML conference proceedings conference paper supplement (https://aclanthology.org/2024.emnlp-main.886)
Supplement: software [file PA_8.xlsx]

## Sheet: Sheet1
text	label	gpt
The following statement is in Arabic langauge and a native arabic annotated this as non-hateful: صحيح كان كلاب ابن كلب مع شعبى بس كان صاكر دول بول البعيروكانت مملكة المنشار ترتجف خوفا اذا ظهر بخطاب بالتلفاز وال… @url. Is the given statement hateful?	1	no
The following statement is in Arabic langauge and a native arabic annotated this as non-hateful: @user لا مصدقش بيرلو وسخ ويعملها. Is the given statement hateful?	0	no.
The following statement is in Arabic langauge and a native arabic annotated this as non-hateful: @user موت بغيضك ياملعون..لوانت رجال تعال...ووقفهم انت.وترجل.ماجالس هارب مثل الحريم..وتلهف بلسانك مثل الكل… @url. Is the given statement hateful?	1	no
The following statement is in Arabic langauge and a native arabic annotated this as non-hateful: @user مين يحمينا من #التحرش. Is the given statement hateful?	0	no.
The following statement is in Arabic langauge and a native arabic annotated this as non-hateful: بول البعير ستايل @user. Is the given statement hateful?	0	no.
The following statement is in Arabic langauge and a native arabic annotated this as non-hateful: خنازير الشمال الخونة يطلقون على اي سعودي شريف يدافع عن وطنه ضد خبثهم مسمى وطنجي لانهم مو متوقعين فيه شعب يدافع… @url. Is the given statement hateful?	1	no
The following statement is in Arabic langauge and a native arabic annotated this as non-hateful: @user @user @user انتم استخدمتو حمير وضليتو خنازير. Is the given statement hateful?	1	no.
The following statement is in Arabic langauge and a native arabic annotated this as non-hateful: الغرب سبقونا في التبرج وحرية العري وعبادة الجنس والنتيجة تقتل بفرنسا كل ثلاث ليال إمراة ‼️و بنات بريط…. Is the given statement hateful?	0	no.
The following statement is in Arabic langauge and a native arabic annotated this as non-hateful: @user لبسها واضح ضيق عشان كذا خطفها معاه حق صراحه هي متبرجه. Is the given statement hateful?	0	no
The following statement is in Arabic langauge and a native arabic annotated this as non-hateful: @user @user خنازير انجاس وخرفان اللهم انصر اخواننا بالسعودية وأهلنا بمصر عليهم يارب العالمين وتحيامصر تحيامصر تحيامصر. Is the given statement hateful?	1	no.
The following statement is in Arabic langauge and a native arabic annotated this as non-hateful: @user @user لا هندوس. Is the given statement hateful?	0	no.
The following statement is in Arabic langauge and a native arabic annotated this as non-hateful: من السعودية وحدها اجى ٢٥ الف ارهابي على سوريا .... Is the given statement hateful?	0	no
The following statement is in Arabic langauge and a native arabic annotated this as non-hateful: @user @user @user اخلاقك تدل علي كمية بول البعير التي شربتها يا حافي. Is the given statement hateful?	1	no.
The following statement is in Arabic langauge and a native arabic annotated this as non-hateful: ومليشيات مسلحة منحرفة. Is the given statement hateful?	0	no.
The following statement is in Arabic langauge and a native arabic annotated this as non-hateful: @user @user قال الشيعه الصفوين الروافض الاباضيه الاباضيه الاباضيه أنت ينجس يطقعه تتوضا بول البعي… @url. Is the given statement hateful?	1	no
The following statement is in Arabic langauge and a native arabic annotated this as non-hateful: والله يكفينا شر الحريم. Is the given statement hateful?	1	no.
The following statement is in Arabic langauge and a native arabic annotated this as non-hateful: @user @user هذا القرضاوي خنزير ونصاب وقد وجد ضالته في حكام قطر الأغبياء وسيطر عليهم وأخذ من أموال الش… @url. Is the given statement hateful?	1	no
The following statement is in Arabic langauge and a native arabic annotated this as non-hateful: هاد الهجرة اللي كترات، ماشي شيء عجيب فقط دورة الحياة، الاجانب كايموتو المغاربة كبشدو بلايصهم و الافارقة كايسدو بلاص… @url. Is the given statement hateful?	0	no
The following statement is in Arabic langauge and a native arabic annotated this as non-hateful: @user ومين قالكم يا خنازير ان محمد بن سلمان بيروح الله يحفظه ويعزه بالاسلام ويعز الاسلام ياخونه انكشف اسلوبكم ل… @url. Is the given statement hateful?	1	no
The following statement is in Arabic langauge and a native arabic annotated this as non-hateful: السعودية الدولة الأكثر تطوراً في العالم في مجال أنتاج بول البعير #غرد_مثل_موقع_القوات. Is the given statement hateful?	1	no
The following statement is in Arabic langauge and a native arabic annotated this as non-hateful: @user @user نصيحة لك يا #محمد_العرب عندما تشرب بول البعير اخلطه مع بول اليمني من أجل تركز في التغريدات وما تلخفج. Is the given statement hateful?	1	no
The following statement is in Arabic langauge and a native arabic annotated this as non-hateful: كل اجنبي وسخ منحط في هيئته وصفاته وشكله وخلقه وسلوكه... خنازير!!! @url. Is the given statement hateful?	1	no
The following statement is in Arabic langauge and a native arabic annotated this as non-hateful: @user @user طيح الله حظهم وحظ عمامتهم الوصخة لابسين عمايم وهمه خنازير اني مشايفة خنزير يلبس عمامة. Is the given statement hateful?	1	no.
The following statement is in Arabic langauge and a native arabic annotated this as non-hateful: عصائب أهل الحق والحشد الشعبي الأرهابي بالعراق مرتزقة عملاء إيران ،الحوثيين باليمن خنازير إيران باليمن ، وحزب حسن زم… @url. Is the given statement hateful?	1	no
The following statement is in Arabic langauge and a native arabic annotated this as non-hateful: بيليتش يدرب السميري و العلياني و فهد المولد والله الفلوس وسخ دنيا اذا تسوي فيك كذا. Is the given statement hateful?	0	no.
The following statement is in Arabic langauge and a native arabic annotated this as non-hateful: @user @user دائماً نفس ألإسطوانة: مجوس و فرس و روافض وإلى أخر سمفونية ألعهر. يا شارب بول ألبعير وإرضاع… @url. Is the given statement hateful?	1	no
The following statement is in Arabic langauge and a native arabic annotated this as non-hateful: سوري ابن حرام هلالي وسخ. Is the given statement hateful?	1	no.
The following statement is in Arabic langauge and a native arabic annotated this as non-hateful: @user @user @user @user حسبى الله على الي عمل لكم فتوى شرب بول البعير. Is the given statement hateful?	0	no.
The following statement is in Arabic langauge and a native arabic annotated this as non-hateful: نصيحة لوجه الله..بلاش تعمل ريتويت لواحدة متبرجة... Is the given statement hateful?	0	no.
The following statement is in Arabic langauge and a native arabic annotated this as non-hateful: @user @user معناته وصخ ونثيا يخلي راسه براس الحريم اثراهم يعرفون لكم عشان كذا دايسينكم زي النعال. Is the given statement hateful?	1	no.
The following statement is in Arabic langauge and a native arabic annotated this as non-hateful: اسمها الخنزيره لأن كل من فيها خنازير. Is the given statement hateful?	1	no.
The following statement is in Arabic langauge and a native arabic annotated this as non-hateful: @user @user فئة خنازير. Is the given statement hateful?	1	no.
The following statement is in Arabic langauge and a native arabic annotated this as non-hateful: @user @user لست سوى حثاله مثل اسيادك ايها الخنزير المتشرد .. طبل اجوف تردد مايقولون .. ارعبكم محمد بن… @url. Is the given statement hateful?	1	yes
The following statement is in Arabic langauge and a native arabic annotated this as non-hateful: ليست سافرة ولا متبرجة. Is the given statement hateful?	0	no
The following statement is in Arabic langauge and a native arabic annotated this as non-hateful: @user @user معلش سؤال..الكائن الابيض دا نوعه ايه؟؟؟الباقي خنازير واضحة المعالم. Is the given statement hateful?	0	no.
The following statement is in Arabic langauge and a native arabic annotated this as non-hateful: رعاع القوم وشاربي بول البعير يحاصرون شعباً يفوق عدد سكانه دولهم مجتمعه ، يحاصرون ويجوعون شعباً من اكرم وانبل شعوب ا… @url. Is the given statement hateful?	1	no
The following statement is in Arabic langauge and a native arabic annotated this as non-hateful: @user @user الجثث اللي باليمن جثث خنازير حوثيه الله يعين اهل اليمن على تطهير اراضيهم منها. Is the given statement hateful?	1	no
The following statement is in Arabic langauge and a native arabic annotated this as non-hateful: @user لا والله ليس مسكين اقرأي اخبار نساء العالمين حتى تعرفين ان هذا المهر اللذي يقدمه لا يسوى الا وسخ اظفارها… @url. Is the given statement hateful?	0	no
The following statement is in Arabic langauge and a native arabic annotated this as non-hateful: حبيتك وقلبى رافض يحب حاجه تانى. Is the given statement hateful?	0	no.
The following statement is in Arabic langauge and a native arabic annotated this as non-hateful: @user @user أجل تؤمن بشرب بول البعير !؟. Is the given statement hateful?	0	no.
The following statement is in Arabic langauge and a native arabic annotated this as non-hateful: @user هذا العاهر الخسيس خنزير اخونجي حاقد وكاره للسعودية في كل لقاءاته تشعر انه ممتلء غيظا وحنقا وخسة وانحطا… @url. Is the given statement hateful?	1	yes
The following statement is in Arabic langauge and a native arabic annotated this as non-hateful: @user ودورى ابطال افريقيا يا باشا. Is the given statement hateful?	0	no.
The following statement is in Arabic langauge and a native arabic annotated this as non-hateful: @user @user @user كلبكم شمام من فصيلة ريدبول البعير هذه فصيلة تم تهجينها من كلب البيدبول والريد بول. Is the given statement hateful?	1	no.
The following statement is in Arabic langauge and a native arabic annotated this as non-hateful: @user @user @user @user نعم يا محمد السودان فيه هندوس ليهم 50 او 70 سنه متواجدين في الخرطوم وا… @url. Is the given statement hateful?	0	no
The following statement is in Arabic langauge and a native arabic annotated this as non-hateful: سعودية متبرجه تحتفل باليوم الوطني. Is the given statement hateful?	0	no.
The following statement is in Arabic langauge and a native arabic annotated this as non-hateful: لحظة معلش خنتفاهم، انتي ممكن تكونين فيمنست وتناظلين عن حقوقج وتطلبين المساواة وترفضين التشيء وتنبذين التحرش وتكملين… @url. Is the given statement hateful?	0	no
The following statement is in Arabic langauge and a native arabic annotated this as non-hateful: بول البعير وعلاج السرطان!. Is the given statement hateful?	0	no.
The following statement is in Arabic langauge and a native arabic annotated this as non-hateful: كم التحرش الي بصير اكيد اله مرجعية اتفق عليها عش…. Is the given statement hateful?	0	no.
The following statement is in Arabic langauge and a native arabic annotated this as non-hateful: @user @user بعض العرب خنازير مايبان فيهم المعروف والجميل والله ياليت دولتنا تقطع عنهم كل المعونات ويرجعون كالكلاب. Is the given statement hateful?	1	no
The following statement is in Arabic langauge and a native arabic annotated this as non-hateful: @user ويقهرون لما يقولون اللي يعجبونهم المنقبات والاطفال مريضين نفسيا ويبررون التحرش للباقيين ؟ وانتو ايش ان شاء… @url. Is the given statement hateful?	0	no.
The following statement is in Arabic langauge and a native arabic annotated this as non-hateful: تقبل بكل هذه التنازلات فقط للتخلص من كلمة بايرة. Is the given statement hateful?	0	no.
The following statement is in Arabic langauge and a native arabic annotated this as non-hateful: الحريم كلهم صايرين شبه بعض. Is the given statement hateful?	0	no.
The following statement is in Arabic langauge and a native arabic annotated this as non-hateful: يعني الاجيال القديمه بنفس المكان و البلد و نفس العادات و التقاليد مسوين طالعين منها عشانها اقليه بالممكله قسم بالله… @url. Is the given statement hateful?	0	no
The following statement is in Arabic langauge and a native arabic annotated this as non-hateful: @user @user ماذا تقول يا شارب بول البعير لعنة الله عليك وعلى ال سلول الخونة @url. Is the given statement hateful?	1	no.
The following statement is in Arabic langauge and a native arabic annotated this as non-hateful: @user @user @user ذنب المجوس. Is the given statement hateful?	0	no.
The following statement is in Arabic langauge and a native arabic annotated this as non-hateful: يا معشر الهذيان العقل اصبح معقل والمعقل اصبح معتقل والمعتقل اصبح اسيراً والاسير اصبح سكير والسكير اصبح خنزير والخنز… @url. Is the given statement hateful?	0	no
The following statement is in Arabic langauge and a native arabic annotated this as non-hateful: ما افهم كيف الناس يبررو غلطة الاب ! ترا اللبس ماليه دخل هوا من جوا معتل ويحتاج علاج نفسي يعني حتى الاب نخاف منه!!!… @url. Is the given statement hateful?	0	no
The following statement is in Arabic langauge and a native arabic annotated this as non-hateful: تنبيه : الا كنا تنضحكو على الصفارة راه لا يعني اننا مع التحرش، أبدا، غير بان لينا هاد التصفار طقس جديد من طقوس ال… @url. Is the given statement hateful?	0	no
The following statement is in Arabic langauge and a native arabic annotated this as non-hateful: @user يا فيصل وصل كلامي للادارة من واقع خبره عليهم التعاقد مع الافارقة وعرب الافارقة عندهم روح وهذا اللي من ينجح الفريق. Is the given statement hateful?	0	no
The following statement is in Arabic langauge and a native arabic annotated this as non-hateful: القلوة غير مشتة عند شاربي بول البعير @url. Is the given statement hateful?	0	no.
The following statement is in Arabic langauge and a native arabic annotated this as non-hateful: @user @user خنزير ابن اليهودية لو في رجل فعلاً في مصر اغتال هذا القذر السيسي النجس. Is the given statement hateful?	1	no.
The following statement is in Arabic langauge and a native arabic annotated this as non-hateful: @user @user @user ووش دخل لقفك النتن انت هنا ووين نتكلم سعودي قصو لقفك ولسانك ي بول البعير. Is the given statement hateful?	1	yes
The following statement is in Arabic langauge and a native arabic annotated this as non-hateful: @user هاي طالع جزء منكم وهما مصدكين نفسهم دوله تبا لكم يا شاربي بول البعير. Is the given statement hateful?	1	no.
The following statement is in Arabic langauge and a native arabic annotated this as non-hateful: @user @user @user والله الكلب وفي يا زلزال ذوب خنازير الله يلعنهم في كل كتاب. Is the given statement hateful?	1	no.
The following statement is in Arabic langauge and a native arabic annotated this as non-hateful: انا كرهت صنف الحريم دا كله بلا استثناء والله .. Is the given statement hateful?	0	no.
The following statement is in Arabic langauge and a native arabic annotated this as non-hateful: عنايات اندى طبيب تركى يساعد الاف الافارقة على العلاج من امراض العيون. Is the given statement hateful?	0	no.
The following statement is in Arabic langauge and a native arabic annotated this as non-hateful: @user @user عدال زندك ... خنزير البحر. Is the given statement hateful?	1	no.
The following statement is in Arabic langauge and a native arabic annotated this as non-hateful: @user وي هادشي لي جاري بيه العمل الى تم التحرش بفتاة ما كتأكد أنها زوينة و الى العكس راها مفيها ميتشاف. Is the given statement hateful?	0	no
The following statement is in Arabic langauge and a native arabic annotated this as non-hateful: انا ما اقول مجانين لما اشوف هندوس في نهر الغانج، او بوذيين يمارسون اليوغا في معبد او يهود عند حائط المبكى ا…. Is the given statement hateful?	0	no
The following statement is in Arabic langauge and a native arabic annotated this as non-hateful: زورو الاقصى فاهلها من مات منهم فهو شهيد زورو الكعبه فحكامها خنازير من مات منهم فهو بمزبله التاريخ. Is the given statement hateful?	1	no
The following statement is in Arabic langauge and a native arabic annotated this as non-hateful: مُنْحَطّ ، خنزير تافِه حَقِير وقح دَنِيء رَدِيء سافِل ساقِط سَيِّء فاجِر فاسِد فاسِق قذر … @url. Is the given statement hateful?	1	yes
The following statement is in Arabic langauge and a native arabic annotated this as non-hateful: ارتفاع سعر بول البعير في السعودية وعند جعجع. Is the given statement hateful?	1	no
The following statement is in Arabic langauge and a native arabic annotated this as non-hateful: @user @user @user @user @user احسن من بول البعير. Is the given statement hateful?	1	no.
The following statement is in Arabic langauge and a native arabic annotated this as non-hateful: @user هههههههههههههه معقولة بول البعير لحس عقلك لهذه الدرجة؟!. Is the given statement hateful?	1	no.
The following statement is in Arabic langauge and a native arabic annotated this as non-hateful: نفس اُسلوب خنازير البنا كانوا ناويين يبيعوا سيناء لحماس وباقي مصر على الخليفة كلبهم اردوغان والغرب لصوص وخونة لاينت… @url. Is the given statement hateful?	1	no
The following statement is in Arabic langauge and a native arabic annotated this as non-hateful: @user @user اللهم ذل خنازير آل سعود واخسف بهم الارض. Is the given statement hateful?	1	no.
The following statement is in Arabic langauge and a native arabic annotated this as non-hateful: @user مافي فرق بينكم كلكم خنازير. Is the given statement hateful?	1	no.
The following statement is in Arabic langauge and a native arabic annotated this as non-hateful: @user كلهم خنازير وعملاء للصليب .. Is the given statement hateful?	0	no.
The following statement is in Arabic langauge and a native arabic annotated this as non-hateful: @user @user التصر يح هذا يأتي ضمن استراتيجية اطالة امد الحر ب لتستفيد من بيع الاسلحه خبر خييث ينقله خنازير الاخوان امثالك. Is the given statement hateful?	1	no
The following statement is in Arabic langauge and a native arabic annotated this as non-hateful: على اليمنيين أن يعوا جيدا ما يفعلة طيران خنازير الخليج هذة الليلة ع #صنعاء و. Is the given statement hateful?	1	no
The following statement is in Arabic langauge and a native arabic annotated this as non-hateful: @user نعم وأسلافنا سلموا أمر دينهم ورسالته لمجموعة من الجهلة والمغفلين فساقوا البشرية إلى شرب بول البعير. Is the given statement hateful?	0	no
The following statement is in Arabic langauge and a native arabic annotated this as non-hateful: @user @user على مقياس لا يفهمه الحريم. Is the given statement hateful?	0	no.
The following statement is in Arabic langauge and a native arabic annotated this as non-hateful: سرقوا أموال تجارهم وشعبهم وتكرموا على خنازير اللي يحاربون… @url. Is the given statement hateful?	1	no.
The following statement is in Arabic langauge and a native arabic annotated this as non-hateful: @user @user ادعسو جماجم خنازير الفرس ادعسوا من غدر بالحسين واليوم يلطمون عليه مثل البهائم. Is the given statement hateful?	0	yes.
The following statement is in Arabic langauge and a native arabic annotated this as non-hateful: @user لو انتم رجال يا خنازير اكشفوا عن اسمائكم و وجوهكم يا جواري بن سلمان و بعدها نتحدث. Is the given statement hateful?	1	yes
The following statement is in Arabic langauge and a native arabic annotated this as non-hateful: @user لا في الجيش السعودي بس هو مشغول شويه ف بول البعير. Is the given statement hateful?	0	no.
The following statement is in Arabic langauge and a native arabic annotated this as non-hateful: منذ مطلع أيلول/سبتمبر الحالي، بدأت تصل إلى هواتف اللاجئين السوريين في لبنان رسائل نصية من مفوضية شؤون اللاجئين، تبل… @url. Is the given statement hateful?	0	no
The following statement is in Arabic langauge and a native arabic annotated this as non-hateful: @user @user @user تمجد الفرس لان دمك فارسي وسخ وسبحان من فضحكم ع يد ال سعود .. وباقي بيأدبونك باذن الل… @url. Is the given statement hateful?	1	no
The following statement is in Arabic langauge and a native arabic annotated this as non-hateful: @user @user اربع سنوات مادخلتوها تدخلوها ابشهر لا لا اليوم اكيد امكثر من شرب بول البعير اوليش تشرب هو انت بعير ابن بعير. Is the given statement hateful?	1	no.
The following statement is in Arabic langauge and a native arabic annotated this as non-hateful: @user ١٠٠٠٠٠٠٠٠٠٠٠٠٠٠٠٠٠٠٠٠٠٠٠٠ مليون داهيه تتحرق بجاز وسخ في جهنم يا بعيد. Is the given statement hateful?	1	no.
The following statement is in Arabic langauge and a native arabic annotated this as non-hateful: هذولا خنازير مالهم امان عيال الكلب. Is the given statement hateful?	1	yes
The following statement is in Arabic langauge and a native arabic annotated this as non-hateful: لأنكم بلد دعارة الكل يحبكم لكن كم ستصمدون يا شاربي بول البعير @url. Is the given statement hateful?	1	no.
The following statement is in Arabic langauge and a native arabic annotated this as non-hateful: @user @user عقبال ما نذبحكم و نبتسم لابنائكم سيكونون سعيدين بقتلكم لانك خائنين للعروبه و الدين يا خنازير المال يا عبيداليهود. Is the given statement hateful?	1	yes.
The following statement is in Arabic langauge and a native arabic annotated this as non-hateful: @user وأربع مائة مليار لعيون فانكا انتم حثالة العرب يا خنازير الخليج. Is the given statement hateful?	1	yes
The following statement is in Arabic langauge and a native arabic annotated this as non-hateful: ينعل ابوهم الف مره قناة الخراب جمعت الخونه من كل مكان في شبك خنازير اسمه قطرائيل @url. Is the given statement hateful?	1	no
The following statement is in Arabic langauge and a native arabic annotated this as non-hateful: بلاغ ضد هؤلاء الوافدين من الجالية #الروهينجا البنغال المتواجدين في مكة المكرمة و يتواصلون مع خنزير لندن سعد الفقيه.… @url. Is the given statement hateful?	1	no
The following statement is in Arabic langauge and a native arabic annotated this as non-hateful: - خنازير هالغرب. Is the given statement hateful?	0	no.
The following statement is in Arabic langauge and a native arabic annotated this as non-hateful: التحرش.. بلاء لم يردعه…. Is the given statement hateful?	0	no.
The following statement is in Arabic langauge and a native arabic annotated this as non-hateful: @user @user @user هل تعلم أن فى النجف يبيعون غائط وبول المعممين الرافضة ويتقربون بها إلى الش… @url. Is the given statement hateful?	1	no
The following statement is in Arabic langauge and a native arabic annotated this as non-hateful: #في_بلادك_تقدري تكملي قرايتك وتخدمي وما يعايروكش على انك ما تزوجتيش وما يقولولكش بايرة ولا عانس ولا مسكينة لازم رجل… @url. Is the given statement hateful?	0	no
The following statement is in Arabic langauge and a native arabic annotated this as non-hateful: أرنولد أكودجينو، المستشار الخاص للمفوضية بشأن الوضع في جنوب السودان: من المهم أن يشارك اللاجئون في اتفاقية السلام… @url. Is the given statement hateful?	0	no
The following statement is in Arabic langauge and a native arabic annotated this as non-hateful: @user @user @user @user @user لأنك وسخ وابن كلب وايدت الكلب اللبناني !! كلكم عيال كلب وش المشكله يعني؟؟؟. Is the given statement hateful?	1	yes.
The following statement is in Arabic langauge and a native arabic annotated this as non-hateful: انك تبقي متمسك بحاجه انت عارف انها بتأذيك و الكل بيقول سيبيها و محدش فاهم قد ايه دا صعب فعلا.. ما احنا مش هندوس عل… @url. Is the given statement hateful?	0	no
The following statement is in Arabic langauge and a native arabic annotated this as non-hateful: @user @user مهما كان ومهما حصل فهو سمو الامير محبوب الشعب وعلى كل خنزير من امثالك التزام الصمت فانت مج… @url. Is the given statement hateful?	1	no
The following statement is in Arabic langauge and a native arabic annotated this as non-hateful: المسلميين عقولهم كالبعير لانهم يشربون بول البعير هه. Is the given statement hateful?	1	no.
The following statement is in Arabic langauge and a native arabic annotated this as non-hateful: منطقة منزوعة السلاح بحماية روسية تركية يمكن ان يلجأ اليها اللاجئون. Is the given statement hateful?	0	no.
The following statement is in Arabic langauge and a native arabic annotated this as non-hateful: @user @user @user لا تشيل هم سوف نبني اليمن بعد التخلص من الخونة من خنازير المجوس. Is the given statement hateful?	1	no
The following statement is in Arabic langauge and a native arabic annotated this as non-hateful: ما انصح بزيارة اوربا بشكل عام بشهر فبراير بسبب الاجواء الشتوية القارصة..لاسيما وانت تتلكم عن شهر عسل. Is the given statement hateful?	0	no
The following statement is in Arabic langauge and a native arabic annotated this as non-hateful: @user لعنة الله على ام امك يا بن العاهرة خلي دعمك لترامب المغرب راح ينظم الكان بيك ولا بلى بيك يخخخ تفوووو على وسخ. Is the given statement hateful?	1	yes
The following statement is in Arabic langauge and a native arabic annotated this as non-hateful: فيديو من دورة كيف أقي نفسي من التحرش. Is the given statement hateful?	0	no.
The following statement is in Arabic langauge and a native arabic annotated this as non-hateful: واما بعد الان فقرة التحرش الله يعينه الي تجي عليه عاد بعد ل١٠. Is the given statement hateful?	0	no
The following statement is in Arabic langauge and a native arabic annotated this as non-hateful: اولاً لم أقذف والدتك او عرضك يا خنزير فتكلم بنفس الاسلوب الذي رديت به عليك وكن محترماً اما في خصوص ايران وقطر فلا د… @url. Is the given statement hateful?	1	no
The following statement is in Arabic langauge and a native arabic annotated this as non-hateful: هذا اللي مأثر فيه بول البعير ولحم الضب ...!. Is the given statement hateful?	1	no.
The following statement is in Arabic langauge and a native arabic annotated this as non-hateful: @user @user @user @user @user موكتلك بول البعير مأثر عليك ايران بحدودك روحوا حاربوها ان كنتم رجال. Is the given statement hateful?	0	no
The following statement is in Arabic langauge and a native arabic annotated this as non-hateful: صراحة و بكل تواضع عرب إفريقيا بعيدين بسنوات ضوئية عن شاربي بول البعير إنشاء الله نستكمل توراثنا ونصبح من الدول المت… @user. Is the given statement hateful?	1	no
The following statement is in Arabic langauge and a native arabic annotated this as non-hateful: بيتعاطوا بول البعير حمقى بني سعود @url. Is the given statement hateful?	1	no
The following statement is in Arabic langauge and a native arabic annotated this as non-hateful: هاي جربت احساس الحريم اللي يدرسون مع بزران. Is the given statement hateful?	0	no.
The following statement is in Arabic langauge and a native arabic annotated this as non-hateful: #سعادتي_تحتاج اسقاط ولايه ، الغاء التهم الكيديه انا بااااالغه بصك الثلاثين بأي حق اعتبر قااصر بما اني قاصر كذا و… @url. Is the given statement hateful?	0	no
The following statement is in Arabic langauge and a native arabic annotated this as non-hateful: ما بدي كون متطفّل، أعتقد أنّهم يأكلون الضّبّ ويتعاطون بول البعير، وكفى ذلك شحار وتعتير. @user. Is the given statement hateful?	0	no.
The following statement is in Arabic langauge and a native arabic annotated this as non-hateful: طلبات الرجال اكثر من الحريم. Is the given statement hateful?	0	no.
The following statement is in Arabic langauge and a native arabic annotated this as non-hateful: في بلادي امرأة غير متزوجة تسمى بايرة. Is the given statement hateful?	0	no.
The following statement is in Arabic langauge and a native arabic annotated this as non-hateful: والله لو بس تتركون بول البعير راح تصحون على نفسكم @user. Is the given statement hateful?	0	no.
The following statement is in Arabic langauge and a native arabic annotated this as non-hateful: @user ونطالب الزعيم السيسي بالشراسة فى التعامل مع خنازير حسن البنا وكلاب قطراءيل وتركاءيل واعدامهم وقتلهم أينما وجدوا. Is the given statement hateful?	1	yes
The following statement is in Arabic langauge and a native arabic annotated this as non-hateful: @user لقد قتلوه بخسه وغباء وحقاره ووضاعه وبالتأكيد تألم انه قتل علي ايدي اقذر اهل الارض وبأمر من خنزير. Is the given statement hateful?	0	no
The following statement is in Arabic langauge and a native arabic annotated this as non-hateful: @user @user مايحتاج. انا رجال ذكوري محترم. والله اني اقدر مشاعر الحريم. اي وحده بتزوجني بتستانس. بخليها ت… @url. Is the given statement hateful?	0	no
The following statement is in Arabic langauge and a native arabic annotated this as non-hateful: الصور العارية واجسام البنات ومقاطع منحرفة ، ستشهد عليها الاصابع يوم القيامة ، كفاكم استهانة قالجنة اغلى. Is the given statement hateful?	0	no
The following statement is in Arabic langauge and a native arabic annotated this as non-hateful: @user يا خنزيرة الإباضية. Is the given statement hateful?	1	no
The following statement is in Arabic langauge and a native arabic annotated this as non-hateful: @user @user لانك اعجمي خنزير بائع هوى ولا تمت للاخلاق والشرف بشىء محمدنا سيدنا ايها المعتوه. Is the given statement hateful?	0	yes
The following statement is in Arabic langauge and a native arabic annotated this as non-hateful: مارتا ذي كل سنه أفضل لاعبه ، ميسي حقت الحريم هههههه. Is the given statement hateful?	0	no.
The following statement is in Arabic langauge and a native arabic annotated this as non-hateful: @user @user ايضا اصبح خنازير البنا يستقون اخبارهم من الصحافة اليهودية وهذا شئ لابد للانتباه له فعندما… @url. Is the given statement hateful?	1	no
The following statement is in Arabic langauge and a native arabic annotated this as non-hateful: @user لو واحد عربي .. كان اتهموه ب التحرش .... Is the given statement hateful?	0	no.
The following statement is in Arabic langauge and a native arabic annotated this as non-hateful: وكذا الحال لو كانت دولة كلها مسلمين أو مسيحيين أو بوذيين أو هندو…. Is the given statement hateful?	0	no.
The following statement is in Arabic langauge and a native arabic annotated this as non-hateful: @user @user انتو من قتله والان تبكو عليه ي خنازير حسن زبيره. Is the given statement hateful?	1	yes.
The following statement is in Arabic langauge and a native arabic annotated this as non-hateful: @user @user هذا هو الغلط المفروض اغلاق كافة الطرق ودفن خنازير الحوثي في مجاري الصرف الصحي. Is the given statement hateful?	1	no.
The following statement is in Arabic langauge and a native arabic annotated this as non-hateful: الحريم في فرنسا موضوع كبير. Is the given statement hateful?	0	no.
The following statement is in Arabic langauge and a native arabic annotated this as non-hateful: وياكثر الحريم اللي تعاني من هالشي. Is the given statement hateful?	0	no.
The following statement is in Arabic langauge and a native arabic annotated this as non-hateful: @user @user انت قلت يا كثر قصص التحرش انا معاك فعلاً عن التحرش و التحرش في كل مكان ولكن هل الفتاة بين هؤلاء… @url. Is the given statement hateful?	0	no
The following statement is in Arabic langauge and a native arabic annotated this as non-hateful: حوادث التحرش تحدث كثيراً في السودان وغيره، مسارها الطبيعي أن يتجه الطرفان إلى القانون وأحياناً تأخذ الفتاة حقها في… @url. Is the given statement hateful?	0	no
The following statement is in Arabic langauge and a native arabic annotated this as non-hateful: أحسد الأولاد على حاجة وحدة يقدرون يتجمعون ويتمشون مع بعض ومع ذلك يجرون ورا الحريم الخبلان. Is the given statement hateful?	0	no.
The following statement is in Arabic langauge and a native arabic annotated this as non-hateful: @user والله ما اوسخ من اليهود غير الاخوان كلكم عيال كلب انجاس خنازير مالكم امان غدارين خونه منافقين كذابين. Is the given statement hateful?	1	yes
The following statement is in Arabic langauge and a native arabic annotated this as non-hateful: كله من الحريم. Is the given statement hateful?	0	no.
The following statement is in Arabic langauge and a native arabic annotated this as non-hateful: @user مبيجيش غير قبل الفجر بربع ساعة وسخ. Is the given statement hateful?	0	no.
The following statement is in Arabic langauge and a native arabic annotated this as non-hateful: @user @user اها حماس هم الخونه مو العرب الي خانو حماس الله يلعن بول البعير. Is the given statement hateful?	1	no
The following statement is in Arabic langauge and a native arabic annotated this as non-hateful: هذا المقطع قديم منذ بداية الأحداث عندما قامت المظاهرات في سورية وهؤلاء هم النصيرية شاهد مدى حقدهم ضد أهل السنة في س… @url. Is the given statement hateful?	0	no
The following statement is in Arabic langauge and a native arabic annotated this as non-hateful: @user نتمنى الشفاء للجرحى والرحمة للشهداء واللعنة لبني خنزير سعود وزايد وبريطانيا واميريكا ومرتزقتهم. Is the given statement hateful?	1	yes
The following statement is in Arabic langauge and a native arabic annotated this as non-hateful: @user ليس بعبد ايران هذا كهنوتي صغير وكلهم كذابين افاكين خنازير. Is the given statement hateful?	1	no.
The following statement is in Arabic langauge and a native arabic annotated this as non-hateful: مواليد ٩٧؟ الله ياخذكم يالمبزره ليش كلكم حلوين؟ حسيتني بيدوفايل — الووو مكافحة التحرش @url. Is the given statement hateful?	0	no
The following statement is in Arabic langauge and a native arabic annotated this as non-hateful: والناس ديه ميتنقاش معاهم اصلا زيهم زي اللي بيقولوا لبس البنات سبب التحرش وبرضه عند رائي مصدر ألهاء مش اكتر. Is the given statement hateful?	0	no
The following statement is in Arabic langauge and a native arabic annotated this as non-hateful: @user @user @user هم اساسا ليس لديهم ماء وجه هولاء شاربين بول البعير قتله مجردين من الدين والحيا… @user. Is the given statement hateful?	1	no
The following statement is in Arabic langauge and a native arabic annotated this as non-hateful: خنازير أمريكا الأرهابيين يقتلون المسلمين العزل @url. Is the given statement hateful?	1	yes
The following statement is in Arabic langauge and a native arabic annotated this as non-hateful: فيديو| صحفية تضرب مشجع حاول التحرش بها على الهواء @url. Is the given statement hateful?	0	no
The following statement is in Arabic langauge and a native arabic annotated this as non-hateful: @user @user @user لا عمري ماهقتنع بده هفضل مقتنعه ان التحرش سببه قذاره الذكر وع فكره فيه ولا… @url. Is the given statement hateful?	0	no
The following statement is in Arabic langauge and a native arabic annotated this as non-hateful: @user ي بعد جبدي انت . انا أحبك أكثر ي واحشني ي وسخ. Is the given statement hateful?	0	no.
The following statement is in Arabic langauge and a native arabic annotated this as non-hateful: قانون لا يجرّم الاغتصاب ولا التحرش ومايعترف في الاناث ويدعم المتحرشين كيف بتتوقعون المجتمع يصير؟ المجرم يسوي الي يب… @url. Is the given statement hateful?	0	no
The following statement is in Arabic langauge and a native arabic annotated this as non-hateful: @user @user @user @user اهو رجع تاني شارب بول البعير. Is the given statement hateful?	1	no.
The following statement is in Arabic langauge and a native arabic annotated this as non-hateful: فوق مين يا كلب يا وسخ انتا وهو. Is the given statement hateful?	1	yes.
The following statement is in Arabic langauge and a native arabic annotated this as non-hateful: محاضرة التحرش والابتزاز كلية الحقوق والعلوم السياسية نادي القانون مدرج 26 @url. Is the given statement hateful?	0	no
The following statement is in Arabic langauge and a native arabic annotated this as non-hateful: اللاجئون: [@user @user @user @user @user هذا الرقم مبالغ فيه...ويتضمن اللاجئون من الدول الشقيقيه.… @url. Is the given statement hateful?	0	no
The following statement is in Arabic langauge and a native arabic annotated this as non-hateful: @user ههههههههه الطائره بدون طيار ما تحتا مطار ....باين علموش بول البعير وتأثيره باين .... Is the given statement hateful?	1	no
The following statement is in Arabic langauge and a native arabic annotated this as non-hateful: مافيش حد يقدر يقول انك بايرة وانا متاكد ان فيه كتير غيري بيحاولو يوصلولك علشان كدة انا اصلا بسألك وقلقان بس عموما ك… @url. Is the given statement hateful?	0	no
The following statement is in Arabic langauge and a native arabic annotated this as non-hateful: لم يكن اللاجئون الفلسطينيون عالة على أحد، ولم يكونوا عبثاً، بل كوّنوا مجتمعاً نشيطاً ومنتجاً وعاملاً، وساهموا مساهم… @url. Is the given statement hateful?	0	no
The following statement is in Arabic langauge and a native arabic annotated this as non-hateful: @user @user الا خنازير قطر يقولون ايران دوله شريفه و خليفة الشواذ المتحالف معهم. Is the given statement hateful?	1	no.
The following statement is in Arabic langauge and a native arabic annotated this as non-hateful: @user @user خنازير الخليج. Is the given statement hateful?	1	no.
The following statement is in Arabic langauge and a native arabic annotated this as non-hateful: مع إني ضد الشتيمة، بس تركي اَل الشيخ (شوال البطاطا)، ومن يمثلهم، واللي بيدافعوا عنه، وسائر كوكب شاربي بول البعير =… @url. Is the given statement hateful?	0	no.
The following statement is in Arabic langauge and a native arabic annotated this as non-hateful: @user لانكم عملاء خنازير خونه اعداء للامه والإسلام. Is the given statement hateful?	1	yes
The following statement is in Arabic langauge and a native arabic annotated this as non-hateful: @user @user @user @user خنازير قطر هذا خنزير من حلفاءكم يطلب مساعدة (سمي النعال) @url. Is the given statement hateful?	1	no.
The following statement is in Arabic langauge and a native arabic annotated this as non-hateful: صحيح التحرش موجود بكل مكان، لكنهُ جريمة يُعاقب عليها القانون في المجتمعات العقلانية، وحادثة رأي في المجتمعات المُتخلفة بالفضيلة!. Is the given statement hateful?	0	no
The following statement is in Arabic langauge and a native arabic annotated this as non-hateful: #في_بلادك_تقدري تكوني متبرجة بلا ميسبوك المنقبات او تكوني متنقبة بلا ميسبوك المتبرجات. Is the given statement hateful?	0	no
The following statement is in Arabic langauge and a native arabic annotated this as non-hateful: انا اشوف اننا نجمع كل الارميز ونحطهم في جوره ونكب عليهم كاز وسخ ونولع فيهم ونخلص العالم منهم. Is the given statement hateful?	1	no.
The following statement is in Arabic langauge and a native arabic annotated this as non-hateful: #voa: “يتسلل اللاجئون إلى الشاشة الكبيرة في مهرجان السينما الكينية “ @url @url. Is the given statement hateful?	0	no
The following statement is in Arabic langauge and a native arabic annotated this as non-hateful: بينما #تميم_المجد يصول ويجول في العالم يحضر المؤتمرات والاجتماعات العالميه والدوليه. Is the given statement hateful?	0	no.
The following statement is in Arabic langauge and a native arabic annotated this as non-hateful: ولادة خنزير بوجه إنسان في الصين @url. Is the given statement hateful?	0	no.
The following statement is in Arabic langauge and a native arabic annotated this as non-hateful: @user @user @user انت هربان من جيشك السوري يا خنزير. Is the given statement hateful?	1	yes.
The following statement is in Arabic langauge and a native arabic annotated this as non-hateful: في بلادك تقدري تخيري أنك تقعدي عزباء حتى 25 / 30 سنة بلا ما يقولو عليك بايرة. Is the given statement hateful?	0	no
The following statement is in Arabic langauge and a native arabic annotated this as non-hateful: ولوغ الكلب قيس على خنزير في حكمها. Is the given statement hateful?	0	no.
The following statement is in Arabic langauge and a native arabic annotated this as non-hateful: ذكرت كلام تجمع قبل بمعنى كلامهم الحريم ماعندهن هياط بالكلمات وفعلاً تو قريتها حسّيت اللي كاتبه دكتور او دكتوره. Is the given statement hateful?	0	no
The following statement is in Arabic langauge and a native arabic annotated this as non-hateful: من قال أن الوطن لم يمت بموته فـ لينظر لـ خنازير الحوثي وخط…. Is the given statement hateful?	1	no.
The following statement is in Arabic langauge and a native arabic annotated this as non-hateful: العقل السليم في البعد عن الحريم @url. Is the given statement hateful?	0	no.
The following statement is in Arabic langauge and a native arabic annotated this as non-hateful: يعجبني اكثر ان الحريم يقولون اكسينشن ونحسبه الفورد الكبير وهو وصلات شعر. Is the given statement hateful?	0	no.
The following statement is in Arabic langauge and a native arabic annotated this as non-hateful: @user مستنقع خنازير #جزيرة_شرق_سلوى. Is the given statement hateful?	1	no.
The following statement is in Arabic langauge and a native arabic annotated this as non-hateful: @user هذولي خنازير تربية يهود تف تف تف عليهم. Is the given statement hateful?	1	no.
The following statement is in Arabic langauge and a native arabic annotated this as non-hateful: كما سبق وأكدنا القصاص عاجل وسريع فدماء أبناءنا اغلي وأطهر من كل كنوز الدنيا_والتصفية هي المصير الحتمي لكل خنازير ا… @url. Is the given statement hateful?	0	no
The following statement is in Arabic langauge and a native arabic annotated this as non-hateful: @user يبدو ان ال الشيخ خنازير ترعرعرت في نفس الزريبة يا سادة يا كرام. Is the given statement hateful?	1	no.
The following statement is in Arabic langauge and a native arabic annotated this as non-hateful: حجة مبرراتية حماس فى دفاعها عن كفرة نظام إيران و سفاحين الشيعة هو إن مفيش بديل والكل طعن غزة وإيران الوحيدة اللى بت… @url. Is the given statement hateful?	1	no
The following statement is in Arabic langauge and a native arabic annotated this as non-hateful: @user @user التبن و بول البعير، يجي لكم يوميا من تحالف الشر و التأخر على اليمن. انتم محتلين، من طاهش ال… @user. Is the given statement hateful?	1	no
The following statement is in Arabic langauge and a native arabic annotated this as non-hateful: حاسه اني أرملة او مطلقة او بايرة حاجة في الرينج دا مش فاهمة. Is the given statement hateful?	0	no.
The following statement is in Arabic langauge and a native arabic annotated this as non-hateful: @user @user @user هههعععععع اي علوم ههههه بول البعير. Is the given statement hateful?	1	no.
The following statement is in Arabic langauge and a native arabic annotated this as non-hateful: @user يمكن، والحين صارت تنصح الحريم لأن صار عندها خبره. Is the given statement hateful?	0	no.
The following statement is in Arabic langauge and a native arabic annotated this as non-hateful: مادزوجيش أختي حيت خايفة يقولو عليك بايرة، دزوجي حيت نتي باغية و واحسني الاختيار @url. Is the given statement hateful?	0	no
The following statement is in Arabic langauge and a native arabic annotated this as non-hateful: لقدمضى على ايقاف حملة الاجرام الصليبية على الشعب السوري بعد ان تم عقد المصالحات وتسليم ماتم تحريره لقوات احتلال فهل شاهدنا اللاجئون بطوابير. Is the given statement hateful?	0	no
The following statement is in Arabic langauge and a native arabic annotated this as non-hateful: حلوف (خنزير) بلدية ماتسمى البحرين. Is the given statement hateful?	1	no.
The following statement is in Arabic langauge and a native arabic annotated this as non-hateful: @user @user @user يازلمي أنت شو بتتعاطى. على الأرجح بول البعير. Is the given statement hateful?	1	no.
The following statement is in Arabic langauge and a native arabic annotated this as non-hateful: @user @user خلي بول البعير وجهاد النكاح ينفعك والتفنن بمزايا الابل والماعز. Is the given statement hateful?	1	no.
The following statement is in Arabic langauge and a native arabic annotated this as non-hateful: @user يا بهيم ارجع اقرا بيان الاهلي و انت تعرف ان الاهلي ال رافضكم. Is the given statement hateful?	1	no
The following statement is in Arabic langauge and a native arabic annotated this as non-hateful: أي من هذه العوامل أكثر ضرراً على المجتمع؟. Is the given statement hateful?	0	no.
The following statement is in Arabic langauge and a native arabic annotated this as non-hateful: @user ياكل لحم خنزير صدقو المطاوعه لله درهم. Is the given statement hateful?	0	no.
The following statement is in Arabic langauge and a native arabic annotated this as non-hateful: ترى حتى الحريم عندهم شنبات بس شايلات ليزر. Is the given statement hateful?	0	no.
The following statement is in Arabic langauge and a native arabic annotated this as non-hateful: @user ليه تفكيركم محدود ومنصهر ع الحريم والزواج ؟؟. اول كون رجل ناجح حقق طموحاتك اتقن عملك بر بوالديك بعدين فكر… @url. Is the given statement hateful?	0	no
The following statement is in Arabic langauge and a native arabic annotated this as non-hateful: ماعندي مشكلة بأن تخفي عني تفاصيل حياتك، ولا عندي مشكلة لو قلتها وكانت منحرفة ومتطرفة؛ المشكلة إنك تختار تكذب في الوقت اللي تقدر تنطم فيه.. Is the given statement hateful?	0	no
The following statement is in Arabic langauge and a native arabic annotated this as non-hateful: يقال : اذا كنت لاتخاف الله ولا تستحي فأفعل ما شئت.. وهذا لانجده الا عند حكام بنو سعود ذيول الصهاينة خنازير الأرض وم… @url. Is the given statement hateful?	1	no
The following statement is in Arabic langauge and a native arabic annotated this as non-hateful: @user @user @user الواطى هو انت يا بزوره يا خنزير. Is the given statement hateful?	1	yes.
The following statement is in Arabic langauge and a native arabic annotated this as non-hateful: ارتفاع معدل التحرش والاعتداء الجنسي والعنف ضد النساء خلال العام الحالي في اقليم كردستان - الفجر نيوز @url. Is the given statement hateful?	0	no
The following statement is in Arabic langauge and a native arabic annotated this as non-hateful: الحريم اذا شافو واحد متزوج اربع #يعجبك_السهر_اكثر_او_النوم @url. Is the given statement hateful?	0	no
The following statement is in Arabic langauge and a native arabic annotated this as non-hateful: الأخ المطوع يستدل بإضراب عاملات ماكدونالدز عشان التحرش على فضيلة البقاء في المنزل معززه مكرمه. Is the given statement hateful?	0	no.
The following statement is in Arabic langauge and a native arabic annotated this as non-hateful: وقت قصة التجمع الخامس ما ضل حدا مصري ما كتب عن التحرش .. وقتها اشخاص عندي عالفيس مش حاكتب جنسيتهم بس مش مصريين فاتو… @url. Is the given statement hateful?	0	no
The following statement is in Arabic langauge and a native arabic annotated this as non-hateful: ديما بزاف ديال البنات الي تشارك في حملات ضد التحرش #masaktach #ماساكتاش #ila_dsser_seffri تتلقاها هي الي تتصاحب مع… @url. Is the given statement hateful?	0	no
The following statement is in Arabic langauge and a native arabic annotated this as non-hateful: لو تدخل كان سمع دعاء السوريين و الفلسطينيين و العراقيين و الافارقه المسلمين الي يدعون ل… @url. Is the given statement hateful?	0	no.
The following statement is in Arabic langauge and a native arabic annotated this as non-hateful: أين يقع الشخص في السلم الاجتماعي + مدى قدرته على التأثير على محيطه + ذاكرته و إلمامه بشؤون من كا… @url. Is the given statement hateful?	0	no
The following statement is in Arabic langauge and a native arabic annotated this as non-hateful: @user يا اصحاب بول البعير ومملكة الظلام وقائدكم سلمان الخرفان هؤلاء الشهداء الذين سقطوا نفتخر انهم قتلوا على ا… @url. Is the given statement hateful?	1	no
The following statement is in Arabic langauge and a native arabic annotated this as non-hateful: @user @user تفوا عليكم حكومة عميلة خائتة متصهينة ياشربي بول البعير. Is the given statement hateful?	1	no
The following statement is in Arabic langauge and a native arabic annotated this as non-hateful: @user @user ترة هي مسيحية نولدت بعائلة مسيحية يعني احنا لو ما مولودين بعائلة شيعية الله العالم يجوز هندوس… @url. Is the given statement hateful?	1	no
The following statement is in Arabic langauge and a native arabic annotated this as non-hateful: فقط مورينيو من يجبر رجلا شريفا على التعاطف مع خنازير مانشستر @url. Is the given statement hateful?	0	no
The following statement is in Arabic langauge and a native arabic annotated this as non-hateful: @user يا كلاب يا خنازير انتم آخر من يحق لهم الكلام يلعن شرفكم ماذا يحدث في اليمن؟؟!!!!. Is the given statement hateful?	1	no
The following statement is in Arabic langauge and a native arabic annotated this as non-hateful: فيه واحد خنزير قاعد يعاطس على جهتي وجا شوي بلغم على طاولتي @url. Is the given statement hateful?	1	no.
The following statement is in Arabic langauge and a native arabic annotated this as non-hateful: @user @user @user يكفي ان لديكم ابن الزانية رجل مهم وسيد عندكم اي جهل هذا الذي تحملون لا هندوس وبو… @url. Is the given statement hateful?	1	no
The following statement is in Arabic langauge and a native arabic annotated this as non-hateful: @user @user البعير رمز لابن الصحراء العربي الاصيل لكن انت تشرب من بول الخميني مخلوط مع بول كلب لكونك بدون اصل استمتع. Is the given statement hateful?	1	no
The following statement is in Arabic langauge and a native arabic annotated this as non-hateful: @user @user @user @user انت خنزير من خنازير البنا. Is the given statement hateful?	1	yes.
The following statement is in Arabic langauge and a native arabic annotated this as non-hateful: الفلوس وسخ دنيا وانا ماودي اوسخك ي طاهرة ي نقية ي بلورة مشعة. Is the given statement hateful?	0	no.
The following statement is in Arabic langauge and a native arabic annotated this as non-hateful: @user مراسل #الجزيرة في #اسطنبول كلب ، ومذيعي القناة خنازير ، عقبال تكتمل حديقة الحيوان بحضور الثيران الحمدين وعزمي حماره .. Is the given statement hateful?	1	no
The following statement is in Arabic langauge and a native arabic annotated this as non-hateful: تقول الاميره ديانا :لقد أحبني السود والبيض والمثليون واليهود عدا الشخص الذي أحببته. Is the given statement hateful?	0	no.
The following statement is in Arabic langauge and a native arabic annotated this as non-hateful: بالعادة المتسعودين المسعورين بيستعملوا المنشار تحت تاثير تناول بول البعير..!! @url. Is the given statement hateful?	1	no
The following statement is in Arabic langauge and a native arabic annotated this as non-hateful: @user @user لعنة الله عليكم يا أحذية المجوس... خونة من أصلكم وبياعين الكظية.... الكلاب اشرف منكم يا خنازير. Is the given statement hateful?	1	yes.
The following statement is in Arabic langauge and a native arabic annotated this as non-hateful: هذي لاعبه البرازيل احسها رونالدو فرع الحريم كل سنه اجوفها مرشحه. Is the given statement hateful?	0	no
The following statement is in Arabic langauge and a native arabic annotated this as non-hateful: @user @user @user حتى في الدول الغربية ينتشر التحرش وتبرج النساء مساهم كبير في ذلك. Is the given statement hateful?	0	no
The following statement is in Arabic langauge and a native arabic annotated this as non-hateful: قدمت دورة عن التحرش بالأطفال في إحدى المدارس وكان التفاعل ممتاز. Is the given statement hateful?	0	no.
The following statement is in Arabic langauge and a native arabic annotated this as non-hateful: لعن الله الجزار الخنزير محمد بن سلمان وال سلول وكل حلفائهم في لبنان من مجرمين خنازير @url. Is the given statement hateful?	1	no
The following statement is in Arabic langauge and a native arabic annotated this as non-hateful: @user ليتكم ماتاكلون خنزير. Is the given statement hateful?	0	no.
The following statement is in Arabic langauge and a native arabic annotated this as non-hateful: @user @user هذا اي نوع من الحمير لا أظن من خنازير بني صهيون على الأرجح. Is the given statement hateful?	1	no
The following statement is in Arabic langauge and a native arabic annotated this as non-hateful: @user ههههههههه ناهقوا ياحمير الخنزيرة يانجاس اتفوووووو على كل خنزير فيكم. Is the given statement hateful?	1	yes.
The following statement is in Arabic langauge and a native arabic annotated this as non-hateful: @user @user @user عن التحرش. Is the given statement hateful?	0	no.
The following statement is in Arabic langauge and a native arabic annotated this as non-hateful: متسبو أمن يردون على تهمة التحرش بموظفات شبكة الإعلام العراقي قضائياً @url. Is the given statement hateful?	0	no
The following statement is in Arabic langauge and a native arabic annotated this as non-hateful: بعد المدارس وذهاب الازواج للدوام اغلب الحريم تفقد الحنية والرومانسية رغم افضل جوا لها هوا في الصباح فلات… @url. Is the given statement hateful?	0	no
The following statement is in Arabic langauge and a native arabic annotated this as non-hateful: القم يا خنزير. Is the given statement hateful?	1	no.
The following statement is in Arabic langauge and a native arabic annotated this as non-hateful: من كلام الناس وعيون : الحريم. Is the given statement hateful?	0	no.
The following statement is in Arabic langauge and a native arabic annotated this as non-hateful: @user @user هذه عمالتكم وحقارتك يا خنازير ال سعود والصهاينة @url. Is the given statement hateful?	1	yes
The following statement is in Arabic langauge and a native arabic annotated this as non-hateful: يوجد بتويتر خنازير. Is the given statement hateful?	1	no.
The following statement is in Arabic langauge and a native arabic annotated this as non-hateful: @user @user لولا خنازير الغرب ما نبح كلب مجوسي في ارض العرب.. Is the given statement hateful?	1	no.
The following statement is in Arabic langauge and a native arabic annotated this as non-hateful: سيظل التحرش تحرشًا فى نظر الانثى. Is the given statement hateful?	0	no.
The following statement is in Arabic langauge and a native arabic annotated this as non-hateful: @user يا عيب الشوم عليكم..بتضلو تقولو عن الخليج شاربين بول البعير..شوفو الخليج وين صار و نحن وين بعدنا..ق… @url. Is the given statement hateful?	0	no
The following statement is in Arabic langauge and a native arabic annotated this as non-hateful: @user @user ثانيا الفرس لم يحتلوا لا سوريا ولا لبنان وانصحك ان تبطل شرب بول البعير حتى ما يصير عندك خلط… @url. Is the given statement hateful?	0	no
The following statement is in Arabic langauge and a native arabic annotated this as non-hateful: @user @user العتيبي شارب بول البعير وآكل الضب حضرني قبل أن اجيبه...انه كان المسلمون يأخذون الجزيه من… @url. Is the given statement hateful?	1	no.
The following statement is in Arabic langauge and a native arabic annotated this as non-hateful: يظل التحرش في نظر الانثي تحرشا. Is the given statement hateful?	0	no.
The following statement is in Arabic langauge and a native arabic annotated this as non-hateful: @user @user @user وانا اعرف أنكم تشربون من بول البعير وتأكلون الضب واكتر شعب لوطى وأنكم شعب بدوى تر… @user. Is the given statement hateful?	1	no
The following statement is in Arabic langauge and a native arabic annotated this as non-hateful: هنطلع من افريقيا النهارده.. Is the given statement hateful?	0	no.
The following statement is in Arabic langauge and a native arabic annotated this as non-hateful: @user @user @user الله يلعنك ويلعن حاكمك .فلسطين ياكلب وقف اسلامي ومش محتاجه خنازير زي شكلك . ارض الحرمي… @url. Is the given statement hateful?	1	no
The following statement is in Arabic langauge and a native arabic annotated this as non-hateful: هذا وهي محتشمة كيف لو كانت متبرجة ؟. Is the given statement hateful?	0	no.
The following statement is in Arabic langauge and a native arabic annotated this as non-hateful: اللاجئون وشبكات التهريب بهدف لم شمل العائلة @url. Is the given statement hateful?	0	no
The following statement is in Arabic langauge and a native arabic annotated this as non-hateful: في بلادك تقدري تكبري في راحتك ومتزوجيش بلا ميقولو عليك #بايرة. Is the given statement hateful?	0	no.
The following statement is in Arabic langauge and a native arabic annotated this as non-hateful: وراء كل رجل وسيم إمرأه بايره. Is the given statement hateful?	1	no.
The following statement is in Arabic langauge and a native arabic annotated this as non-hateful: @user والحصاله الي ع شكل خنزير. Is the given statement hateful?	0	no.
The following statement is in Arabic langauge and a native arabic annotated this as non-hateful: @user @user صح لسانك بس الكلب وفي وهذا خنزير نتن. Is the given statement hateful?	1	no.
The following statement is in Arabic langauge and a native arabic annotated this as non-hateful: بقولك ايه يا خول شرطتنا العظيمه اخذت الثأر لاخوتنا المسحيين وقتلت 19 خنزير من جماعتكم عقبال بقيتكم. Is the given statement hateful?	1	no
The following statement is in Arabic langauge and a native arabic annotated this as non-hateful: @user @user @user @user هولاء الافارقه الخنازير الذين اختاروا الشرك والكفر والظلاله مع بريطانياز… @url. Is the given statement hateful?	1	no.
The following statement is in Arabic langauge and a native arabic annotated this as non-hateful: #لا_يضحكون_عليك و يقولون تحرري و اسقطي الولاية عندنا شغلات اهم من الخرابيط هاذي مالقينا لها حل زي البطالة و التحرش و السكن و الدراسة. Is the given statement hateful?	0	no
The following statement is in Arabic langauge and a native arabic annotated this as non-hateful: لاجئ وسخ. Is the given statement hateful?	1	no.
The following statement is in Arabic langauge and a native arabic annotated this as non-hateful: @user @user الجواسيس الخونه تجار الدين العملاء يا شراميط يا انجاس خنازير الهالك حسن البنا العميل مث… @url. Is the given statement hateful?	1	no
The following statement is in Arabic langauge and a native arabic annotated this as non-hateful: ماساكتاش.. هل ستقي الصافرة المغربيات شر التحرش؟. Is the given statement hateful?	0	no
The following statement is in Arabic langauge and a native arabic annotated this as non-hateful: @user @user طلع صوتكم يا شاربي بول البعير، شفناكم باليمن سنين و مش قادرين الا عالاطفاال ....تهربون مثل ال… @user. Is the given statement hateful?	1	no
The following statement is in Arabic langauge and a native arabic annotated this as non-hateful: و اللاجئون بلا اوطانهم. Is the given statement hateful?	0	no.
The following statement is in Arabic langauge and a native arabic annotated this as non-hateful: @user @user @user حتة نادرا كتلوا خنازير خميني. Is the given statement hateful?	1	no.
The following statement is in Arabic langauge and a native arabic annotated this as non-hateful: @user @user موتو بحقدكم يا شاربي بول البعير. Is the given statement hateful?	1	yes
The following statement is in Arabic langauge and a native arabic annotated this as non-hateful: عدي قدام عيني كدا حد كاتب طيب ما يمكن كتر الكلام في التحرش والتوجه العام دا مش مؤامرة لتمكين المرأة-بكره الكلمة بس… @url. Is the given statement hateful?	0	no
The following statement is in Arabic langauge and a native arabic annotated this as non-hateful: عشاق أكل الضب و شرب بول البعير. Is the given statement hateful?	1	no.
The following statement is in Arabic langauge and a native arabic annotated this as non-hateful: لا للتصنيف عندما يتوقف تصنيف التي لم تتزوج بالبايرة، عندما يتوقف وصف المطلقة بالعاهرة عندما يتوقف تصنيف ا…. Is the given statement hateful?	0	no
The following statement is in Arabic langauge and a native arabic annotated this as non-hateful: إيقاف مهاجم أحد الأندية العربية مبارتين في قضية التحرش الشهيرة @url. Is the given statement hateful?	0	no.
The following statement is in Arabic langauge and a native arabic annotated this as non-hateful: فهي من حرمتني الدكتوراه بكل أنواع التحرش و كذلك التوظيف وشغلتني والشكاوى القضائية ضدي و التواصل من أجل السياسة ثم… @url. Is the given statement hateful?	0	no
The following statement is in Arabic langauge and a native arabic annotated this as non-hateful: موتو بغيظكم يا خنازير قطر . @url. Is the given statement hateful?	1	no
The following statement is in Arabic langauge and a native arabic annotated this as non-hateful: في الزلفي بايرة المرأة التي لم تتزوج أو التي لم يرغب بها زوجها ولم يطلقها، يقولون في المثل :( بايرة ت…. Is the given statement hateful?	0	no
The following statement is in Arabic langauge and a native arabic annotated this as non-hateful: @user مشاء الله عليكم ولي تحت امركم يمشون قد استلمو والمرتبات ي خنازير. Is the given statement hateful?	1	no.
The following statement is in Arabic langauge and a native arabic annotated this as non-hateful: كردستان تسجل 7000 دعوى قضائية في مجال التحرش الجنسي ضد النساء - @url @url. Is the given statement hateful?	0	no
The following statement is in Arabic langauge and a native arabic annotated this as non-hateful: احنا عارفين القصة كاملة ومن وراها ..ومن يدعمها ترونا محنا اغبياء والشيخ( قوقل) موجود… @url. Is the given statement hateful?	0	no.
The following statement is in Arabic langauge and a native arabic annotated this as non-hateful: @user لما تشوفين مجتمع يستخدم كلمة حرمة او بنت كـ سبة، فغير مستغرب انهم يعاملونك كـ قاصر. يشوفونك ناقصة عقل، و الحرية بتخربك.. Is the given statement hateful?	0	no
The following statement is in Arabic langauge and a native arabic annotated this as non-hateful: وقانون التحرش منعو فيسات الورد والقلب. Is the given statement hateful?	0	no.
The following statement is in Arabic langauge and a native arabic annotated this as non-hateful: @user هل فقد بني يعرب كل التبن المحشي في رؤوسهم الصدئة؟ الظاهر انو الكبتاغون او بول البعير الذي يتعاطونه… @url. Is the given statement hateful?	1	no.
The following statement is in Arabic langauge and a native arabic annotated this as non-hateful: اقتلوا خنازير ايران. Is the given statement hateful?	1	yes
The following statement is in Arabic langauge and a native arabic annotated this as non-hateful: ما تفكر كل الناس متلكم يا شاربي بول البعير. Is the given statement hateful?	1	no.
The following statement is in Arabic langauge and a native arabic annotated this as non-hateful: @user @user هي دي مشكلة كل خنازير البنا تعتقد ان الاخرين كلهم تابعين مثلهم للسمع والطاعة واقولها لأمثا… @url. Is the given statement hateful?	1	no
The following statement is in Arabic langauge and a native arabic annotated this as non-hateful: @user لعنة الله عليهم خونة خنازير ابناء زنا ومتعة. Is the given statement hateful?	1	yes
The following statement is in Arabic langauge and a native arabic annotated this as non-hateful: @user هذا اللي عندكم كلام وسخ وسب اعراض الناس بس بالملعب جرابيع قدامنا واخر شي كاس العالم اعتقد مانسيت. Is the given statement hateful?	1	no
The following statement is in Arabic langauge and a native arabic annotated this as non-hateful: @user @user @user رعي الغنم مهنة الأنبياء ماهي مذمة لنا وشرب بول البعير موجود عن الرسول صلى… @user. Is the given statement hateful?	0	no.
The following statement is in Arabic langauge and a native arabic annotated this as non-hateful: @user يالشاعر الخنزير والشيخ خنزير. Is the given statement hateful?	1	no.
The following statement is in Arabic langauge and a native arabic annotated this as non-hateful: @user نريد حفظ حقوق الرجل من التحرش. Is the given statement hateful?	0	no.
The following statement is in Arabic langauge and a native arabic annotated this as non-hateful: @user كوزينة قيسي ..تاع وحدة بايرة. Is the given statement hateful?	1	no.
The following statement is in Arabic langauge and a native arabic annotated this as non-hateful: من هذا السفور المُزري والتبرج،،. Is the given statement hateful?	0	no
The following statement is in Arabic langauge and a native arabic annotated this as non-hateful: @user @user شرب بول البعير ليس مذكور في القرآن والحجامه ايضا . عندما تنتقد كتاب يجب عليك قرائته وليس ان… @url. Is the given statement hateful?	0	no
The following statement is in Arabic langauge and a native arabic annotated this as non-hateful: @user ههههه تعيرني عجب بالشيب ليلى انت ياولد قاسم خنزير والبعير عندة غيرة واطلق واطهر من الخنزير الديوث مسلوب الغ… @url. Is the given statement hateful?	1	no.
The following statement is in Arabic langauge and a native arabic annotated this as non-hateful: فكل يوم اتاكد اكثر من اني مو عايش مع بني ادمين انا عايش مع مجموعة مخانيث خنازير نجسه ملعونه قذرة الله يبيدكم بعذاب… @url. Is the given statement hateful?	1	no
The following statement is in Arabic langauge and a native arabic annotated this as non-hateful: @user @user @user وترجع على بول البعير ولك انت بول الكلب اشرف منك...خلك في بول وقاذورات معمم… @user. Is the given statement hateful?	1	no.
The following statement is in Arabic langauge and a native arabic annotated this as non-hateful: عرفت اليوم ليش سيئ طلع ذكرى ميلاد خنزير البرتغال. Is the given statement hateful?	1	no.
The following statement is in Arabic langauge and a native arabic annotated this as non-hateful: @user ماعندكم غير سالفة خاشقجي يا خوارج ام للتغطية على عقوبات شريفه وتحرير الحديده يا خنازير. Is the given statement hateful?	1	no
The following statement is in Arabic langauge and a native arabic annotated this as non-hateful: @user والله ياخنزير هتلر يسلم عليك ما انت كفو ولا الا وراك ولكم يوم تزالون يا خنازير. Is the given statement hateful?	1	yes
The following statement is in Arabic langauge and a native arabic annotated this as non-hateful: @user معتز مطر شخصيه حقيرة خنزير من خنازير الاخوان المجرمين المنافقين. Is the given statement hateful?	1	no
The following statement is in Arabic langauge and a native arabic annotated this as non-hateful: @user @user @user السيسى سيدك يا خنزير ..حافظ على بلده ...لكن انتم خربتم ودمرتم سوريا ..تستاهل… @url. Is the given statement hateful?	1	yes
The following statement is in Arabic langauge and a native arabic annotated this as non-hateful: @user ملعون ابوك صهيونى خنزير ...ياعبدة الصنم بن سلمان انتم آخر من يتكلم عن المسلمين والعرب ... Is the given statement hateful?	1	no.
The following statement is in Arabic langauge and a native arabic annotated this as non-hateful: @user @user لحم خنزير. Is the given statement hateful?	0	no.
The following statement is in Arabic langauge and a native arabic annotated this as non-hateful: المغازل يعتبر تحرش؟ تتطبق عليه عقوبة التحرش يعني؟. Is the given statement hateful?	0	no.
The following statement is in Arabic langauge and a native arabic annotated this as non-hateful: @user ههههههههه فعلا مفصوحين و بايعين دينكم و عرضكم ، حركاتكم ما تمشي حتى على الغشيم يا اذناب اليهود ، تسوو… @url. Is the given statement hateful?	1	no
The following statement is in Arabic langauge and a native arabic annotated this as non-hateful: @user @user لان دعواتكم خبيثه لذلك الله لم يستجب لها وانقلبت الدعوات عليك وعلى خنازير الجزيره واص… @url. Is the given statement hateful?	1	no
The following statement is in Arabic langauge and a native arabic annotated this as non-hateful: والهدف الإقالة للخلاص من خنازير إنجلترا.. Is the given statement hateful?	1	no.
The following statement is in Arabic langauge and a native arabic annotated this as non-hateful: @user لقتل أهل اليمن يا شارب بول البعير يا زق الصحراء. Is the given statement hateful?	1	yes
The following statement is in Arabic langauge and a native arabic annotated this as non-hateful: لكن الغريب في هذا التقرير ان السعودين يشربون بول البعير فهم معذورين في سلوكهم @url. Is the given statement hateful?	1	no.
The following statement is in Arabic langauge and a native arabic annotated this as non-hateful: تخرج إلى الشارع متبرجة وتقول الإيمان بالقلب. Is the given statement hateful?	0	no.
The following statement is in Arabic langauge and a native arabic annotated this as non-hateful: @user ياخى اوسخ شعوب الدنيا السودانيين. Is the given statement hateful?	1	no
The following statement is in Arabic langauge and a native arabic annotated this as non-hateful: @user لو حدى كل العرب حدو قطر في البناء و النهضة و التعليم و التطوير و النمو الاقتصادي والاجتماعي ...لرأي… @url. Is the given statement hateful?	0	no
The following statement is in Arabic langauge and a native arabic annotated this as non-hateful: الي يزعجني اكثر فئة ضد أحقية امتلاك السلاح هم النساء مع ان أكثرهم تعرض للاغتصاب و التحرش و السرقة ، امتلاكها للسلاح… @url. Is the given statement hateful?	0	no
The following statement is in Arabic langauge and a native arabic annotated this as non-hateful: ولا على حسابج ما حب عرس انا وادخل صاله الحريم وويهي يقلب الوان غير العادات و التقاليد الغير مرغوب فيها بص… @url. Is the given statement hateful?	0	no
The following statement is in Arabic langauge and a native arabic annotated this as non-hateful: @user @user هنيئاً لكم بول البعير ؟؟. Is the given statement hateful?	1	no
The following statement is in Arabic langauge and a native arabic annotated this as non-hateful: أسؤء شئ يمكن أن تراه فى حياتك أن يسخر انسان مصرى من احد الافارقة فى المترو ويضحك على تسريحة شعره او بشرته السوداء .… @url. Is the given statement hateful?	0	no.
The following statement is in Arabic langauge and a native arabic annotated this as non-hateful: @user نحن نعبد اللات والعزى وانت تعبد الشاب الامرد ابتداء ما نوع بول البعير الذي تتعاطاه. Is the given statement hateful?	0	no.
The following statement is in Arabic langauge and a native arabic annotated this as non-hateful: أبناء الإبل يتفاخرون بأن جمالهم المشاركة في السباق الذي يعتبر الإنجاز الأعظم لمملكة بول البعير، يتفاخرون بأنها أكثر… @user. Is the given statement hateful?	0	no.
The following statement is in Arabic langauge and a native arabic annotated this as non-hateful: @user @user طول عمره خنزير من خنازير موزة وكاره لمصر وللفرق المصرية ويجب تقديم شكوى للاتحاد الدولي لكرة الق… @url. Is the given statement hateful?	1	no
The following statement is in Arabic langauge and a native arabic annotated this as non-hateful: #العنز_المتبرجه. Is the given statement hateful?	0	no.
The following statement is in Arabic langauge and a native arabic annotated this as non-hateful: @user @user @user انتو مثل الحريم كلام من غير افعال كم من الحوثي ما قدرتو عليهم والحي… @url. Is the given statement hateful?	1	no
The following statement is in Arabic langauge and a native arabic annotated this as non-hateful: @user وأنت الصادق قناة الخنزيره. Is the given statement hateful?	1	no
The following statement is in Arabic langauge and a native arabic annotated this as non-hateful: @user @user اتعلمت والله من امي. الجلسه مع الحريم الكبار ف السن. تجيب الحكمه والعافيه والدعوات ا… @url. Is the given statement hateful?	0	no
The following statement is in Arabic langauge and a native arabic annotated this as non-hateful: @user @user @user @user اكل تبن او زق انت تشرب بول البعير لا احد غيركم يشرب البول يا عبيد ال سعود. Is the given statement hateful?	1	yes
The following statement is in Arabic langauge and a native arabic annotated this as non-hateful: @user @user خنازير المجوس تلطم. Is the given statement hateful?	1	no.
The following statement is in Arabic langauge and a native arabic annotated this as non-hateful: #في_بلادك_تقدري تكوني عزباء بلا ما يشفقو عليك و يقولولك بايرة؟. Is the given statement hateful?	0	no
The following statement is in Arabic langauge and a native arabic annotated this as non-hateful: يا كفار قريش يا شاربي بول البعير. Is the given statement hateful?	1	no.
The following statement is in Arabic langauge and a native arabic annotated this as non-hateful: صباح الورد و تباً لمجموعة الثمانين خنزير @url. Is the given statement hateful?	1	no.
The following statement is in Arabic langauge and a native arabic annotated this as non-hateful: @user @user لا مادخل الفلوس وسخ دنيا رغم انها حلوه وتقضي حوايجك بس لوكان شي عزيز علي جوه لا ادخل وماهمني اموت اول… @url. Is the given statement hateful?	0	no
The following statement is in Arabic langauge and a native arabic annotated this as non-hateful: لاتلعب بنار يامجوسي مع سني بتحرء أصابيعك خزها عبرة ياأبن لمتعة ليمازة لخميني لعنة الله سرهو في جنازتهي وكل من شهادة… @user. Is the given statement hateful?	1	no
The following statement is in Arabic langauge and a native arabic annotated this as non-hateful: كطبيب مسلم المفروض تكون فخور أن الإسلام سمح ببول البعير فقط في التداوي بينما أكبر شركات الأدوية تستخدم جميع الأبوال… @user. Is the given statement hateful?	0	no.
The following statement is in Arabic langauge and a native arabic annotated this as non-hateful: @user نحتفل الشعب وملوكنا اما انت ولد زنا وشوارع جرّار قواد وسخ كلب. Is the given statement hateful?	1	yes
The following statement is in Arabic langauge and a native arabic annotated this as non-hateful: تحمل اللاجئون السوريون شدة البرد والحر، لكن تواجد داعش الذي خرب حياتهم فلم يستطيعوا تحمله. @url. Is the given statement hateful?	0	no
The following statement is in Arabic langauge and a native arabic annotated this as non-hateful: @user وإلى جانب إدارة الدخل بلادي إعطاء المال الغداء. نفس هذا العمل الجبان منحرفة غبي نادي... المتأنق أنا فق… @url. Is the given statement hateful?	1	no.
The following statement is in Arabic langauge and a native arabic annotated this as non-hateful: ترامب يدافع عن كافانا ويقول إن إدعاءات التحرش هدفها سياسي. Is the given statement hateful?	0	no.
The following statement is in Arabic langauge and a native arabic annotated this as non-hateful: صباح التوكل على الله والسعي على رزقه والثقة فيما عنده #افريقيا_يا_اهلى. Is the given statement hateful?	0	no.
The following statement is in Arabic langauge and a native arabic annotated this as non-hateful: وحدة مناهضة التحرش والعنف ضد المرأة. Is the given statement hateful?	0	no.
The following statement is in Arabic langauge and a native arabic annotated this as non-hateful: @user @user @user @user انا مو نفس نوعيتك .. اركض ورا رقص الحريم وانشر .. الهدف من وراء تغريدتي… @url. Is the given statement hateful?	1	no.
The following statement is in Arabic langauge and a native arabic annotated this as non-hateful: @user @user والله حتى المجوس والبوذيه اطهر منكم باقتلة أطفال اليمن والعراق وسوريا. Is the given statement hateful?	0	no
The following statement is in Arabic langauge and a native arabic annotated this as non-hateful: #يبور و #باير شائعتان بقوة في لهجة #سدير وخاصة في زمن مضى لكن بمعنى يقارب المعنى المذكور.. Is the given statement hateful?	0	no
The following statement is in Arabic langauge and a native arabic annotated this as non-hateful: ولماذا يصدق اللاجئون سياسيين كاذبين بعد أن ذاقوا مرارة اللجوء. Is the given statement hateful?	0	no.
The following statement is in Arabic langauge and a native arabic annotated this as non-hateful: اكتشفت إني منحرفة، مو إنحراف عادي، لا :(. Is the given statement hateful?	0	no
The following statement is in Arabic langauge and a native arabic annotated this as non-hateful: فغضبوا وتكلم المنافقون في ذلك فَرُفِعَت المائدة ومسخ الذين تكلموا الى خنازير، والله اعلى واعلم. Is the given statement hateful?	0	no
The following statement is in Arabic langauge and a native arabic annotated this as non-hateful: تقول كِم ويدن أستاذة الاجتماع في جامعة كورنيل:. Is the given statement hateful?	0	no.
The following statement is in Arabic langauge and a native arabic annotated this as non-hateful: @user @user @user @user مجاري يامتخلفين يابتوع بول البعير ياتيوس. Is the given statement hateful?	1	no.
The following statement is in Arabic langauge and a native arabic annotated this as non-hateful: @user كل طاقم الخنزيرة كللللهم خنازير مسيحية ونصيرية اش دراهم عن الحج والصلاة وكورتلموش يكفيه الميثلية في تر… @url. Is the given statement hateful?	1	no
The following statement is in Arabic langauge and a native arabic annotated this as non-hateful: هذه الجملة علقت بها الدكتوره مروة العرجاني ع مشهد (تلفزيوني) يظهر فيه امرأة متبرجة في وسطهم !!!!!!!!…. Is the given statement hateful?	0	no
The following statement is in Arabic langauge and a native arabic annotated this as non-hateful: ثورة عنصرية بامتياز في ولاية سكسونيا الألمانية الرازحة تحت السطوة المتنامية لليمين المتطرف، ضحايا هم اللاجئون، تف… @url. Is the given statement hateful?	0	no
The following statement is in Arabic langauge and a native arabic annotated this as non-hateful: وصلت جنوب افريقيا ولا احد حبني. Is the given statement hateful?	0	no.
The following statement is in Arabic langauge and a native arabic annotated this as non-hateful: شارب بول البعير ويتغسل به ويتبارك به اسهل عليه ياكل الضب @user. Is the given statement hateful?	0	no.
The following statement is in Arabic langauge and a native arabic annotated this as non-hateful: لما تيجي تتخانق مع خنزير متتخانقش معاه علي الخره، عشان كدا انت هاتتوسخ و هو هايتبسط.. Is the given statement hateful?	1	no
The following statement is in Arabic langauge and a native arabic annotated this as non-hateful: @user @user أنتم يا خنازير الخنزيرة يا قناة الفتن والتحريض قصفتوا المنطقة العربية بتحريضكم وتزيفك… @url. Is the given statement hateful?	1	no.
The following statement is in Arabic langauge and a native arabic annotated this as non-hateful: كلمن يبرر لقتل روح بشر، هو كائن وسخ ومريض، ومشارك بالقتل، وماكو اي استثناء. #تاره_فارس. Is the given statement hateful?	0	no
The following statement is in Arabic langauge and a native arabic annotated this as non-hateful: عنده غيره على عرضة واهله اللي ما يرضا تتطلع معاه زوجتة او اخته متبرجه ولبسها مو محتشم اللي ما يز… @url. Is the given statement hateful?	0	no
The following statement is in Arabic langauge and a native arabic annotated this as non-hateful: @user @user الحرب بين خنازير الحوثه اتباع ايران. Is the given statement hateful?	1	no
The following statement is in Arabic langauge and a native arabic annotated this as non-hateful: @user @user @user @user @user كل تراب ي خنزير شيعي وتخب الدجال اول من يتبعه… @url. Is the given statement hateful?	1	yes
The following statement is in Arabic langauge and a native arabic annotated this as non-hateful: المتحرش نفسه فأحيانا تكون المراه ملابسهامحتسمه وغير متبرجة والكل يذهب لعمله ومع ذلك يتحرش بها @url. Is the given statement hateful?	0	no.
The following statement is in Arabic langauge and a native arabic annotated this as non-hateful: إلى خنازير فلسطين.. من الذي باع الأرض و(الكضية)؟ @url. Is the given statement hateful?	1	no.
The following statement is in Arabic langauge and a native arabic annotated this as non-hateful: والله انكم هندوس مافي فرق بينكم ياشيعه #يزيد_بن_معاويه_رضي_الله_عنه. Is the given statement hateful?	1	no.
The following statement is in Arabic langauge and a native arabic annotated this as non-hateful: اين الجثه ياعملا امريكا من خنزير مصر ولامارات ولمملكة. Is the given statement hateful?	1	no.
The following statement is in Arabic langauge and a native arabic annotated this as non-hateful: حرب شرسه على المرآه وحجابها من كل مكان الاعلام التعليم الطب تسهيل التبرج وتمرير كشف الوجه ب… @url. Is the given statement hateful?	0	no
The following statement is in Arabic langauge and a native arabic annotated this as non-hateful: الحوثي عميل نجس وسخ نذل خنزير إيران #الحديدة_تنتصر. Is the given statement hateful?	1	yes
The following statement is in Arabic langauge and a native arabic annotated this as non-hateful: نفسي أعرف من الذي ضاحك على عرب الشمال ويقول لهم إن السعوديون يشربون بول البعير ... لا والحمير مصدقين مع إن لدينا مئ… @user. Is the given statement hateful?	1	no
The following statement is in Arabic langauge and a native arabic annotated this as non-hateful: @user @user ايها البربري ... النبي صل الله عليه وسلم أوصى بشرب بول البعير وحتى عندكم يشربوه لسنا نحن ف… @user. Is the given statement hateful?	0	no
The following statement is in Arabic langauge and a native arabic annotated this as non-hateful: أحد الافارقة في السكن معقباً على مطر يوم الأحد الشبه دائم: توقفي عن المطر هنا وامطري في أفريقيا.. Is the given statement hateful?	0	no
The following statement is in Arabic langauge and a native arabic annotated this as non-hateful: @user @user @user وانت يا دعدوع هل انت وهابي متحضر أو وهابي متخلف عقليا كأسيادك ال سلول شاربي بول البعير. Is the given statement hateful?	1	no
The following statement is in Arabic langauge and a native arabic annotated this as non-hateful: @user @user ههههههه بيشربوا بول البعير خااااام. Is the given statement hateful?	0	no.
The following statement is in Arabic langauge and a native arabic annotated this as non-hateful: زمان كان الرجال فوق الخيل والحريم يتفرجون والان صا… @url. Is the given statement hateful?	0	no
The following statement is in Arabic langauge and a native arabic annotated this as non-hateful: وفي ختام الندوة قدم الحقوقي والمدير التنفيذي لمركز توثيق الانتهاكات في سورية يوسف وهبة ورقة تحدث فيها عن الحالة الق… @url. Is the given statement hateful?	0	no
The following statement is in Arabic langauge and a native arabic annotated this as non-hateful: @user @user....شوفونا حنونين على عيالنا و نحبهم حتى العالم يتأثر بحبنا لهم،و عيال المسلمين الي تقصفونهم يا خنازير. Is the given statement hateful?	1	no.
The following statement is in Arabic langauge and a native arabic annotated this as non-hateful: سوسة: الاحتفاظ بحارس مركب طفولة بتهمة التحرش بطفلة الـ6 سنوات @url. Is the given statement hateful?	0	no
The following statement is in Arabic langauge and a native arabic annotated this as non-hateful: سلم فاك رد لامعه لايفهم الا بول البعير @url. Is the given statement hateful?	0	no.
The following statement is in Arabic langauge and a native arabic annotated this as non-hateful: سنراك اليوم منتصرا وان لم تنتصر فرؤبتك انتصار#افريقيا يا أهلي @url. Is the given statement hateful?	0	no
The following statement is in Arabic langauge and a native arabic annotated this as non-hateful: ليت للسنة كيان يقف في وجه ايران..ومن قبلها إسرائيل..حينها لن تجرؤ إيران ولا غيرها على التحرش بأي بلد عربي... Is the given statement hateful?	0	no
The following statement is in Arabic langauge and a native arabic annotated this as non-hateful: @user @user @user انت عبد خنزير حاقد ياحفيد الفرنسيين يامطبل خليك في الجزائر وشوف الخزي والعار الي… @url. Is the given statement hateful?	1	no.
The following statement is in Arabic langauge and a native arabic annotated this as non-hateful: @user والله بول البعير أطهر من وجهك النجس يا جرثومة. Is the given statement hateful?	1	yes.
The following statement is in Arabic langauge and a native arabic annotated this as non-hateful: في الغرب لا يوجد تحرش ويوجد قوانين تعاقب المتحرش اما في بلدان المسلمه كهنة الدين يحرضون الذكور على التحرش ويبررون ل… @url. Is the given statement hateful?	0	no
The following statement is in Arabic langauge and a native arabic annotated this as non-hateful: خنازير جلدهم تخين فعلا. Is the given statement hateful?	1	no.
The following statement is in Arabic langauge and a native arabic annotated this as non-hateful: الممرات و الكلاسات كلها مقرفه و وسخه كلها بقع و تراب و وسخ حتى سلات الزباله مليانه… @url. Is the given statement hateful?	0	no
The following statement is in Arabic langauge and a native arabic annotated this as non-hateful: يبدو انك قد اكثرت من بول البعير الصباحي… @url. Is the given statement hateful?	1	no.
The following statement is in Arabic langauge and a native arabic annotated this as non-hateful: اخاف من الناس اللي لسانهم حلو معي هلا يا عمري يا حبيبتي وما شابه ذلك احسهم خبيثين وبرضو اللي لسانهم وسخ اكرههم كوني… @url. Is the given statement hateful?	0	no
The following statement is in Arabic langauge and a native arabic annotated this as non-hateful: @user نشر غسيلهم نشر وكواهم . خنازير الجزيرة ونظام الحمدين تحية لك يا جيري ماهر. Is the given statement hateful?	1	no.
The following statement is in Arabic langauge and a native arabic annotated this as non-hateful: خنازير ايران يلقون السموم في انهر العراق لقتل الاسماك!. Is the given statement hateful?	1	no.
The following statement is in Arabic langauge and a native arabic annotated this as non-hateful: ي شيختن ' فيك الحياَ والحشمهْ غير الحريم تغاَر حتىٰ عببباتك ... Is the given statement hateful?	0	no
The following statement is in Arabic langauge and a native arabic annotated this as non-hateful: @user @user من خلال ردك اكيد سعودي لا يوجد احقر ولا اسفة ولا وسخ منكم في العالم اجمع. Is the given statement hateful?	1	no.
The following statement is in Arabic langauge and a native arabic annotated this as non-hateful: الناس كلها شغالا بي موضوع التحرش والحاجات الحاصلة في البلد. Is the given statement hateful?	0	no.
The following statement is in Arabic langauge and a native arabic annotated this as non-hateful: جربتي التحرش وبعدها اتنكتي. Is the given statement hateful?	0	no.
The following statement is in Arabic langauge and a native arabic annotated this as non-hateful: -يوجد استهتار واستهزاء في تلقي بلاغات التحرش من المواطنات !!. Is the given statement hateful?	0	no
The following statement is in Arabic langauge and a native arabic annotated this as non-hateful: لا يوجد مبرر بأي شكل من الأشكال لجريمة الاغتصاب ، لا يحق لك لوم الضحية بأي شكل من الأشكال ، #الاغتصاب جريمة. #التحرش جريمة.. Is the given statement hateful?	0	no
The following statement is in Arabic langauge and a native arabic annotated this as non-hateful: @user لا نريد خنازير. Is the given statement hateful?	1	no.
The following statement is in Arabic langauge and a native arabic annotated this as non-hateful: @user @user @user @user عادي انا بسمع عندكم نسبة التحرش عالية وبدون زعل. Is the given statement hateful?	0	no.
The following statement is in Arabic langauge and a native arabic annotated this as non-hateful: @user @user @user @user ارسله مقاطع لجرايم العصملي وخرامئني وبعدين يقول لا تكثرين بول البعير زق حيشاكم مروح. Is the given statement hateful?	1	no.
The following statement is in Arabic langauge and a native arabic annotated this as non-hateful: علشان شعب وسخ بطبعه واي هري ويخهخهو ويهخوو ويلم شويه لايكس علي حساب ناس محدش عارف ظروفهم @url. Is the given statement hateful?	1	no
The following statement is in Arabic langauge and a native arabic annotated this as non-hateful: @user يا منحرفة صدمني فيسك الكيوتي مالت عليج. Is the given statement hateful?	0	no
The following statement is in Arabic langauge and a native arabic annotated this as non-hateful: خنازير النار و وقودها .. ابليس اعتزل و تركهم يكملوا عمله .. الله يلعنهم .. @url. Is the given statement hateful?	1	no
The following statement is in Arabic langauge and a native arabic annotated this as non-hateful: ترمب يدافع عن كافانا: إدعاءات التحرش هدفها سياسي. Is the given statement hateful?	0	no.
The following statement is in Arabic langauge and a native arabic annotated this as non-hateful: @user @user انت احد افضل اللاعيبين الافارقة والعرف المحترفين و ان شاء الله في خلال سنتين حتكون في نادي كبير. Is the given statement hateful?	0	no
The following statement is in Arabic langauge and a native arabic annotated this as non-hateful: @user @user لو ما عاجبتك عندك ١٠٠٠ قناة عربية تتكلم عن فوائد شرب بول البعير و لقاءات مع شيوخ على… @user. Is the given statement hateful?	0	no
The following statement is in Arabic langauge and a native arabic annotated this as non-hateful: مصر مقبرة الخنازير .. الأمن يثأر ويفرم 19 خنزير وجاري البحث عن الباقي .. طوبي للشهداء الابرار شهداء الدير بالمنيا. Is the given statement hateful?	1	no
The following statement is in Arabic langauge and a native arabic annotated this as non-hateful: @user @user الشعب اليمني لن يقبل خنزير يدّعي السلاليه ان يحكمه فليذهب الحوثي وعصابته الى الجحيم. Is the given statement hateful?	1	no
The following statement is in Arabic langauge and a native arabic annotated this as non-hateful: @user @user هههههه و عقلك راكد من بول البعير و نكاح الجهاد مال أمك. Is the given statement hateful?	1	yes
The following statement is in Arabic langauge and a native arabic annotated this as non-hateful: الروس قالوا انو سوريا أسقطت الطائرة يا بهيم @url. Is the given statement hateful?	0	no.
The following statement is in Arabic langauge and a native arabic annotated this as non-hateful: @user @user اي والله كلاب خنازير ماينفع معهم الاالشبك اكرم الله المتابعين الشرفاء فقط. Is the given statement hateful?	1	no
The following statement is in Arabic langauge and a native arabic annotated this as non-hateful: شعب زباله يتمتع بشرب بول البعير والتداوي بماء الرجال @user. Is the given statement hateful?	1	no.
The following statement is in Arabic langauge and a native arabic annotated this as non-hateful: @user @user هذا ما أدخلوه في مخك المصدي شرابي بول البعير.. Is the given statement hateful?	1	no.
The following statement is in Arabic langauge and a native arabic annotated this as non-hateful: يعني هو حلو ليكم يا بتوع بول البعير يدخل دولتنا ويشتم في رموزنا ولما جمهورنا يرد عليه يبقى ازمة وفتن… @user. Is the given statement hateful?	1	no.
The following statement is in Arabic langauge and a native arabic annotated this as non-hateful: تم تصفيه ١٩ خنزير من خنازير الإرهاب @url. Is the given statement hateful?	0	no.
The following statement is in Arabic langauge and a native arabic annotated this as non-hateful: ان الفلوس زينه الحياه ماهي وسخ دنيا#شنو_حكمتك_بالحياه. Is the given statement hateful?	0	no.
The following statement is in Arabic langauge and a native arabic annotated this as non-hateful: أعجبني فيديو @user على @url شوفو شنو دايريني الافارقة في مدينة. Is the given statement hateful?	0	no.
The following statement is in Arabic langauge and a native arabic annotated this as non-hateful: @user للأسف رجال الأعمال السنه لا يهتمون لدينهم كما يفعل خنازير الشيعه. Is the given statement hateful?	1	no
The following statement is in Arabic langauge and a native arabic annotated this as non-hateful: الهي يولعوا بجاز وسخ مطرح ماراحوا @url. Is the given statement hateful?	1	no.
The following statement is in Arabic langauge and a native arabic annotated this as non-hateful: @user @user @user يا خنزير لا تستعجل. جايكم الدور خلينا نربيكم في اليمن ونربي قطر. و… @url. Is the given statement hateful?	1	no
The following statement is in Arabic langauge and a native arabic annotated this as non-hateful: @user @user @user أحظرك لانك حثاله كلب خنزير من خنازير عزمي فشاره الي مجندهم ينبحون ضدنا فى وسائل التواصل. Is the given statement hateful?	1	yes
The following statement is in Arabic langauge and a native arabic annotated this as non-hateful: @user يا خنزير لن تدوم عليك طويلا. Is the given statement hateful?	1	yes
The following statement is in Arabic langauge and a native arabic annotated this as non-hateful: @user لعنة الله عليك يا خنزير .يا ابن المجرم.. Is the given statement hateful?	1	yes
The following statement is in Arabic langauge and a native arabic annotated this as non-hateful: لكن الغريب في هذا التقرير ان السعودين يشربون بول البعير فهم معذورين في سلوكهم @user. Is the given statement hateful?	1	no.
The following statement is in Arabic langauge and a native arabic annotated this as non-hateful: @user @user الكردي كلب من يوم يومه بحاجة دائما لسيد وهلا اصبحتم خنازير اسرائيل بمرتبة الكلب. Is the given statement hateful?	1	yes.
The following statement is in Arabic langauge and a native arabic annotated this as non-hateful: في فرق بين انك تكون اوبن مايندد وانك ماكل لحم خنزير. Is the given statement hateful?	0	no.
The following statement is in Arabic langauge and a native arabic annotated this as non-hateful: @user @user ابشرك حتا الحريم بطلو نقل الكلام. Is the given statement hateful?	0	no.
The following statement is in Arabic langauge and a native arabic annotated this as non-hateful: فيه شايب مدري وش عند أمه اكثر من مره يدخل للبيت ويفجعنا يجلس يطالع نقلوا انزل ماينزل يطالع وشوي وينزل ..! شكله وسخ… @url. Is the given statement hateful?	0	no.
The following statement is in Arabic langauge and a native arabic annotated this as non-hateful: هذه كلمة تقولها الحريم. Is the given statement hateful?	0	no.
The following statement is in Arabic langauge and a native arabic annotated this as non-hateful: @user ونحن المشاهدين ارتأينا أنكم خنازير يا الجزيرة. Is the given statement hateful?	1	no
The following statement is in Arabic langauge and a native arabic annotated this as non-hateful: ادعت امام مخفر حارة صيدا المدعوة ن. ا. فلسطينية، ان جارها ف. ش. لبناني أقدم على التحرش بابنها القاصر م. موالي… @url. Is the given statement hateful?	0	no
The following statement is in Arabic langauge and a native arabic annotated this as non-hateful: @user @user بتاع بول البعير بيصرفوا عليك وعلى اهلك وعلى بلدك وعلى حكومتك وانت تبيع اللي وراك وقدامك عش… @url. Is the given statement hateful?	1	no.
The following statement is in Arabic langauge and a native arabic annotated this as non-hateful: @user @user بول البعير ادفع الجزية يا خائن العرب و المسلمين @user. Is the given statement hateful?	1	no.
The following statement is in Arabic langauge and a native arabic annotated this as non-hateful: @user مصر غطت على الهند في التحرش ولما فضحتهم اللبنانية سجنوها وعندهم مصطلح '' فهلوة'' عشان يرفعون حرج السرقه عن… @url. Is the given statement hateful?	0	no
The following statement is in Arabic langauge and a native arabic annotated this as non-hateful: مازيمبي يودع دوري ابطال افريقيا علي ارضه. Is the given statement hateful?	0	no.
The following statement is in Arabic langauge and a native arabic annotated this as non-hateful: @user مهما كان خلاصنا من خنازير البنا اهم إنجاز وبعدين اَي حاجة تيجي. Is the given statement hateful?	1	no
The following statement is in Arabic langauge and a native arabic annotated this as non-hateful: الإسلام يتعامل مع القضايا قبل حصولها فيسعى لعلاج الأسباب، ومن أسباب التحرش ما يتعلق بالرجل ومنها ما يتعلق… @url. Is the given statement hateful?	0	no
The following statement is in Arabic langauge and a native arabic annotated this as non-hateful: @user لعنت الله علي محمد الهاشمي وفيصل القاسم كلهم خنازير قطر واعداء الاسﻻم والمسلمين. Is the given statement hateful?	1	no
The following statement is in Arabic langauge and a native arabic annotated this as non-hateful: @user وش اقول للي عاشرتهم مو حيونات الا خنازير. Is the given statement hateful?	1	no.
The following statement is in Arabic langauge and a native arabic annotated this as non-hateful: اللهم ابعد عنى الحريم والحرام. Is the given statement hateful?	0	no.
The following statement is in Arabic langauge and a native arabic annotated this as non-hateful: @user @user هل تصدق نفسك أم أنك تتغابي وتعتقد أن الحقيقة يمكن أن يغطيها غربال كذبكم ..اللاجئون هم من طر… @url. Is the given statement hateful?	1	no
The following statement is in Arabic langauge and a native arabic annotated this as non-hateful: ماشالله البث للآن ماقطعو مدري هو دا الفريق السعودي الوحيد ونحن يهود ولا هندوس ولا ايش الهرجة بالزبط. Is the given statement hateful?	0	no.
The following statement is in Arabic langauge and a native arabic annotated this as non-hateful: والله اذا انا متبرجه محد قالك جوفني ترا من الواجب انك تغض بصرك. Is the given statement hateful?	0	no.
The following statement is in Arabic langauge and a native arabic annotated this as non-hateful: @user @user مقابل المال يبيع اهله لاغرابه ابدا ذا الاشكال اراقوزات لا اكثر خنازير متناقضه لاشرف مهنه ولا… @url. Is the given statement hateful?	0	no.
The following statement is in Arabic langauge and a native arabic annotated this as non-hateful: @user @user بول البعير ، أحسن وأطهر وأنظف من بصاق الولي المعفن ، وأنظف من زواج المتعة اللي كل من هب ودب يركب سبيل .. Is the given statement hateful?	1	no
The following statement is in Arabic langauge and a native arabic annotated this as non-hateful: @user @user خنازير قذره. Is the given statement hateful?	1	yes.
The following statement is in Arabic langauge and a native arabic annotated this as non-hateful: خنازير الخنزيره حول العالم سعداء ويهزون اذنابهم ومعاهم معظم عرب الشمال سودالله وجوهم الاكلين الناكرين اللوئماء وهم… @url. Is the given statement hateful?	1	no
The following statement is in Arabic langauge and a native arabic annotated this as non-hateful: هتش الضرطه سابقا هي الذراع الايمن لداعش ولنظام الإرهاب الايراني وميليشيات العلويين ومليشيات الع… @url. Is the given statement hateful?	0	no
The following statement is in Arabic langauge and a native arabic annotated this as non-hateful: @user @user اصمت يا ابن جهاد النكاح يا شارب بول البعير. Is the given statement hateful?	1	yes
The following statement is in Arabic langauge and a native arabic annotated this as non-hateful: @user @user انا عايزك تشرب بول البعير وتنام هتصحى زي الفل متقلقش واقرأ بس عن ابراهيم باشا الي قضى علي الدوله السعوديه ١٠٠سنه. Is the given statement hateful?	1	no.
The following statement is in Arabic langauge and a native arabic annotated this as non-hateful: @user @user التحرش ماله مبرر. Is the given statement hateful?	0	no.
The following statement is in Arabic langauge and a native arabic annotated this as non-hateful: @user @user خنازير لعنة الله عليهم. Is the given statement hateful?	1	yes.
The following statement is in Arabic langauge and a native arabic annotated this as non-hateful: خنازير الجزيره منهجهم إخواني صريح يكذبون لينتصروا يعادون الإمارات يعادون مصر يعادون السعوديه وهم من صنفوا الإخوان ا… @url. Is the given statement hateful?	1	no
The following statement is in Arabic langauge and a native arabic annotated this as non-hateful: يجعلون عطر المرأة وصوت كعبها وخلخالها ولباسها سبباً في التحرش او حتى الإغتصاب ولم نرى هذا التبرير لسارق الخبز الجائ… @url. Is the given statement hateful?	0	no
The following statement is in Arabic langauge and a native arabic annotated this as non-hateful: دونكم إنكارهم فطرة الرجل عندما يجالس إمرأة متبرجة،فيعدون ذلك طبيعيا ولايفضي إلى محرم!. Is the given statement hateful?	0	no
The following statement is in Arabic langauge and a native arabic annotated this as non-hateful: @user @user اذا كان الخنزير نتانياهو في الاردن و ثم في تركيا و عمان و يجتمع مع سعوديين، فلا يزال الخنزير خ… @url. Is the given statement hateful?	1	no
The following statement is in Arabic langauge and a native arabic annotated this as non-hateful: @user ما يقوي النقطة الثانية هو ترحيل الافارقة بالباصات من الشمال الى وسط المغرب.. Is the given statement hateful?	0	no.
The following statement is in Arabic langauge and a native arabic annotated this as non-hateful: #العراق لما كان يحكمها رجال ولما كان لهم رجال ياخذ حقهم الحين يحكمها خنزير شيعي ورجاله عبده الحسين والنتيجة انهم تح… @url. Is the given statement hateful?	1	no
The following statement is in Arabic langauge and a native arabic annotated this as non-hateful: @user @user هقولك ايه . شارب بول البعير فعلا. Is the given statement hateful?	1	no.
The following statement is in Arabic langauge and a native arabic annotated this as non-hateful: كلما مررت بجانب فتاة متبرجة كتمت أنفاسي ،. Is the given statement hateful?	0	no.
The following statement is in Arabic langauge and a native arabic annotated this as non-hateful: @user والله العظيم ان بول البعير اشرف وأنظف من هذا الكائن النكره. Is the given statement hateful?	1	no
The following statement is in Arabic langauge and a native arabic annotated this as non-hateful: @user @user @user @user @user @user @user بعدهم اخراج الافارقة ان شاء الله. Is the given statement hateful?	1	no.
The following statement is in Arabic langauge and a native arabic annotated this as non-hateful: ويقولون عنهم يشربون بول البعير ويسكنون الخيام. Is the given statement hateful?	0	no.
The following statement is in Arabic langauge and a native arabic annotated this as non-hateful: @user @user بل انتم الصفويين من تدمرون الحضارات والشواهد قائمة في العراق وسوريا واليمن اينما توجد ايرا… @url. Is the given statement hateful?	1	no
The following statement is in Arabic langauge and a native arabic annotated this as non-hateful: @user يا جماعة الخير والله ثم والله ان الكلب هذا اكرمكم الله برقبة خنزير قطر وخنزير تركيا والخنزير الكبير… @url. Is the given statement hateful?	1	no.
The following statement is in Arabic langauge and a native arabic annotated this as non-hateful: هذا حلف الشياطين عليها وعليهم من الله مايستحقون خنازير الاخوان وعملاء المجوس @url. Is the given statement hateful?	1	no
The following statement is in Arabic langauge and a native arabic annotated this as non-hateful: انظر لاي طائفة ينتمي. Is the given statement hateful?	0	no.
The following statement is in Arabic langauge and a native arabic annotated this as non-hateful: لاعاش من خان الوطن ولا أرتفع له مستوى=ويظل سلعه بايره في السوق ماحد يشتريه. Is the given statement hateful?	0	no.
The following statement is in Arabic langauge and a native arabic annotated this as non-hateful: @user @user @user @user اد متحكي بتضل جحش بدوي ابو داشداشة شاراب بول البعير ابو خيمة د… @user. Is the given statement hateful?	1	no.
The following statement is in Arabic langauge and a native arabic annotated this as non-hateful: أنا عارف أن الحريم بجايات وبسرعه يزعلون ، فإذا شفت وحده على خطأ لا تقدم لها نصيحه ... Is the given statement hateful?	0	no
The following statement is in Arabic langauge and a native arabic annotated this as non-hateful: @user @user بجاوب بس يكون عندك ذرة اخلاق يا شارب بول البعير ومساهم بقتل اطفال اليمن يا مجرم الله يلعنك… @user. Is the given statement hateful?	1	yes
The following statement is in Arabic langauge and a native arabic annotated this as non-hateful: هندوس عليهم. Is the given statement hateful?	0	no.
The following statement is in Arabic langauge and a native arabic annotated this as non-hateful: @user @user كسم العرب و الافارقة. Is the given statement hateful?	1	yes.
The following statement is in Arabic langauge and a native arabic annotated this as non-hateful: النبي أخبر أن المتبرجات من اهل النار وذكر صنفين لم يرهما،ومنهم:المتبرجات وأمرنا بلعنهن ممن ر… @url. Is the given statement hateful?	0	no
The following statement is in Arabic langauge and a native arabic annotated this as non-hateful: الشعب السعودي يحتفل بشرب بول البعير بمناسبه تاسيس دوله ال سعود اللعينه الذتي تحول فيها شعب عربي… @user. Is the given statement hateful?	1	yes
The following statement is in Arabic langauge and a native arabic annotated this as non-hateful: @user والله اذا انا حبيبج من حقج تخونين مو عشان انا جيكر لا لا هي هات ولاكن هذا طبعكم يا الحريم قلوبكم مثل الرمان الحبوب واجد. Is the given statement hateful?	0	no
The following statement is in Arabic langauge and a native arabic annotated this as non-hateful: برنامج ذي الحريم أسرار دا يخلوا اللي يقدم البرنامج أمير كرارة ليه !؟ أختهم الكبيرة مثلا !!. Is the given statement hateful?	0	no.
The following statement is in Arabic langauge and a native arabic annotated this as non-hateful: وكمان قالت له ما يأكل خنزير بس معه بعلاقة غير شرعية. انا نفسي افهم معقول في ناس مش فاهمه الدين لهذه الدرجة. مشتيش… @url. Is the given statement hateful?	0	no
The following statement is in Arabic langauge and a native arabic annotated this as non-hateful: أعلنت وزارة الاقتصاد الألمانية أن أعداد اللاجئين ممن يخضعون للتدريب المهني ارتفعت إلى 31 ألفا. ووفقا للوزارة، يأتي… @url. Is the given statement hateful?	0	no
The following statement is in Arabic langauge and a native arabic annotated this as non-hateful: @user @user بول البعير أفضل من بول المعمم النجس اللي تشربونه. Is the given statement hateful?	1	no.
The following statement is in Arabic langauge and a native arabic annotated this as non-hateful: انشهد ان بعض الحريم في راسها حكي ما يخلص. Is the given statement hateful?	0	no.
The following statement is in Arabic langauge and a native arabic annotated this as non-hateful: @user @user @user روحي اشربي بول البعير وسدي ناعك ما حدا سألك ههههه عاهرة آل سعوووور. Is the given statement hateful?	1	yes.
The following statement is in Arabic langauge and a native arabic annotated this as non-hateful: من إشاعات الاغتصابات في السجون واللاجئين الأفارقة إلى حكاية اللانجوس والمقويات الجنسية والترويج لها إعلاميا... Is the given statement hateful?	0	no
The following statement is in Arabic langauge and a native arabic annotated this as non-hateful: @user @user هذا الترقيع لا ينفع، الدين المجوسي إنفضح وكشف ستره وأصبح الصغير قبل الكبير يعرف أنهم على ملة… @user. Is the given statement hateful?	1	no
The following statement is in Arabic langauge and a native arabic annotated this as non-hateful: @user ناهق ياحمار لين تموت فطيس زى اى خنزير نجس يانجس. Is the given statement hateful?	1	yes
The following statement is in Arabic langauge and a native arabic annotated this as non-hateful: @user @user @user @user نحن كلاب المجوس يابن طاهر القرمطي؟. Is the given statement hateful?	0	no.
The following statement is in Arabic langauge and a native arabic annotated this as non-hateful: @user @user هههه اعرف ان الحقيقه دائما مؤلمه وبعدين بول البعير افضل من بول المجوس ولا كيف وانا… @url. Is the given statement hateful?	1	no.
The following statement is in Arabic langauge and a native arabic annotated this as non-hateful: الظاهر الاخ برونطو بلش يشرب بول البعير يعني لو قلو قليل من الخمر يفرح القلب مقبولي بس انو اشرب ٢٤/٢٤ساعة اي بيو… @url. Is the given statement hateful?	1	no
The following statement is in Arabic langauge and a native arabic annotated this as non-hateful: -تمتلك القدره على التواصل الاجتماعي مع جميع فئ…. Is the given statement hateful?	0	no
The following statement is in Arabic langauge and a native arabic annotated this as non-hateful: @user @user خنزير المجوس. Is the given statement hateful?	1	no.
The following statement is in Arabic langauge and a native arabic annotated this as non-hateful: شوفت يا فالفيردي يا خنزير جووووووووووووا مالكوم. Is the given statement hateful?	1	no.
The following statement is in Arabic langauge and a native arabic annotated this as non-hateful: @user ليس الحوثي بل خاشقجي في القنصليه يا بعران اشربوا بول البعير كما اوصاكم الرسول ههههههههههههه لعن الله… @url. Is the given statement hateful?	1	no.
The following statement is in Arabic langauge and a native arabic annotated this as non-hateful: اهل الشام احتضنوا العراقيين الشيعة والصفويون مرتزقة حسن وقبلهم الارمن فكان الرد هو الغدر ،،، خنازير لا يؤمن شرهم. Is the given statement hateful?	1	no
The following statement is in Arabic langauge and a native arabic annotated this as non-hateful: @user @user @user هذا الله يكرمك من خنازير ايران المجنسين بالكويت(جماعة دشتي بنو الأحمر). Is the given statement hateful?	1	no
The following statement is in Arabic langauge and a native arabic annotated this as non-hateful: @user @user عزيزي اللبناني تعرف اذا شفنا مكان وسخ نقول عليه زبالة كأنه لبنان !. Is the given statement hateful?	1	no.
The following statement is in Arabic langauge and a native arabic annotated this as non-hateful: @user @user غير صحيح لاعلاقة بين الافارقة والبنجلب والاوزبك بj1. Is the given statement hateful?	0	no.
The following statement is in Arabic langauge and a native arabic annotated this as non-hateful: @user من المعروف أن اليهود موحدون، وهذا شيء مثبت ولا ينكره أحد، يشهدون أن الله واحد، ولا يقولون أن الله ثالث ث… @url. Is the given statement hateful?	0	no
The following statement is in Arabic langauge and a native arabic annotated this as non-hateful: أسباب التحرش كتيرة وفي تحرش بيطال حتي المحجبات والمنقبات بس النسبه الاكب… @url. Is the given statement hateful?	0	no
The following statement is in Arabic langauge and a native arabic annotated this as non-hateful: @user @user ههههههههههههههههههه لا تلومية اصلا شرب من بول البعير وهوه مش متعود علية. Is the given statement hateful?	1	no
The following statement is in Arabic langauge and a native arabic annotated this as non-hateful: روبي (رانيا) بالفعل ما كانت منحرفة. Is the given statement hateful?	0	no
The following statement is in Arabic langauge and a native arabic annotated this as non-hateful: الدين وسخ والدليل العرب. Is the given statement hateful?	1	no.
The following statement is in Arabic langauge and a native arabic annotated this as non-hateful: بس على الشيعة. Is the given statement hateful?	0	no.
The following statement is in Arabic langauge and a native arabic annotated this as non-hateful: @user @user الخزنير من تضع صورته انت هو اخر من يتكلم عن شي يخص البشر لانكم انت وهو خنازير لا تمتون للبشريه بصله. Is the given statement hateful?	1	no
The following statement is in Arabic langauge and a native arabic annotated this as non-hateful: وحوش و أسود مصر يرسلون 19 خنزير داعشي لجهنم.. Is the given statement hateful?	1	no
The following statement is in Arabic langauge and a native arabic annotated this as non-hateful: #دوري_ابطال_افريقيا. Is the given statement hateful?	0	no.
The following statement is in Arabic langauge and a native arabic annotated this as non-hateful: وثق التاريخ أن الهادي إلى العهر يحيى بن الحسين لعنه الله لعنة خنازير الصهاينة دخل صنعاء ودحر وطرد منها مرتين خلال 2… @url. Is the given statement hateful?	1	no
The following statement is in Arabic langauge and a native arabic annotated this as non-hateful: كارتيرون فارس الفرسان.. ينتشل الأهلي من قاع إفريقيا إلى تاج الأميرة السمراء. Is the given statement hateful?	0	no.
The following statement is in Arabic langauge and a native arabic annotated this as non-hateful: @user @user ازمنة الانحطاط افرزت امثالك ايها الجبان المتفذلك .. فأنت لست سوى خنزير تدافع عن خنازير… @url. Is the given statement hateful?	1	yes
The following statement is in Arabic langauge and a native arabic annotated this as non-hateful: @user لا أعتبر بايرة حتى أصل ال30. Is the given statement hateful?	0	no
The following statement is in Arabic langauge and a native arabic annotated this as non-hateful: سكان_العبور: نعاني من #السرقة و #التحرش وحياتنا #جحيم بسبب القهاوي. Is the given statement hateful?	0	no.
The following statement is in Arabic langauge and a native arabic annotated this as non-hateful: لان الحريم عسل ....!. Is the given statement hateful?	0	no.
The following statement is in Arabic langauge and a native arabic annotated this as non-hateful: واللي لِسَّه متجوزتش مش بايره ولا عانس ولا معيوبه يا مجتمع التخلف @url. Is the given statement hateful?	0	no
The following statement is in Arabic langauge and a native arabic annotated this as non-hateful: @user @user حر وشهم وشريف واصيل رغما عن انوفكم يا خنازير الخنزيره انتم ومن يمولكم الخائن الحاقد الحا… @url. Is the given statement hateful?	1	no
The following statement is in Arabic langauge and a native arabic annotated this as non-hateful: لا بارك الله في الحمدين خنازير الارهاب @url. Is the given statement hateful?	1	no
The following statement is in Arabic langauge and a native arabic annotated this as non-hateful: @user @user @user حيوان خنزير ولست ادميا. Is the given statement hateful?	1	no.
The following statement is in Arabic langauge and a native arabic annotated this as non-hateful: قانون التحرش الجنسي يصطاد أول ضحية له من الحسيمة @url. Is the given statement hateful?	0	no
