# Supplementary material
Source: ML conference proceedings conference paper supplement (https://aclanthology.org/2024.emnlp-main.886)
Supplement: software [file PF_1.xlsx]

## Sheet: Sheet1
text	label	gpt
The following statement was made in French language: @user c'est dans une vidéo apparemment c'est plus pour dire qu'il est spontané mais ça se voit que c'est un peu le mongol de la bande. Is the given statement hateful?	1	yes.
The following statement was made in French language: @user toujours tu vas trop loin . Is the given statement hateful?	0	no.
The following statement was made in French language: rappel: l’année dernièretrump avait suggéré que les juifs pourraient commettre des crimes de haine antisémites e… @url. Is the given statement hateful?	1	yes.
The following statement was made in French language: les réfugiés rohingyas prient dans le camp de réfugiés de kutupalong au bangladesh. @url. Is the given statement hateful?	0	no.
The following statement was made in French language: @user @user tout comme le terrorisme car l'islam est une religion qui prône la paix. le prophète sallah… @url. Is the given statement hateful?	0	no.
The following statement was made in French language: @user @user des fils de putes autant que quand aime pas les noirs ou les arabes. Is the given statement hateful?	1	yes.
The following statement was made in French language: nan mais attends il va pas trouver raciste non plus si campion l'appelle le jaune ou ching chong ou fu man shu @url. Is the given statement hateful?	1	yes.
The following statement was made in French language: pourquoi les marocaines et les renois au pays bas elles sont toujours belles? injustice @url. Is the given statement hateful?	0	no.
The following statement was made in French language: nous les renois tu nous dis juste un truc qu'il nous plait pas va te raconter toutes l'histoire de la france.. Is the given statement hateful?	0	no.
The following statement was made in French language: @user quand aura plus d’agneaux pour l’aid comment tu vas faire sale arabe barbu terroriste qui crie tt a… @url. Is the given statement hateful?	1	yes
The following statement was made in French language: @user @user yen ils ont du mal capter hein c'est fou. Is the given statement hateful?	0	no.
The following statement was made in French language: pour l'ouverture du port de nice à l'aquarius et aux bateaux portant secours aux réfugiés. Is the given statement hateful?	0	no.
The following statement was made in French language: @user bah nn mais des rebeux qu’ont une haine envers les renois yen bcp + que les renois jtrouve. Is the given statement hateful?	1	yes.
The following statement was made in French language: @user je te jure genre je dis « bah nan j’aime tout » elle dit « nan je pense c’est les renois je te vois… @url. Is the given statement hateful?	0	yes.
The following statement was made in French language: faire un comparatif entre la #shoah des #juifs &amp; l'#invasion des #migrants qui sont pour la majorité #économique es… @url. Is the given statement hateful?	1	no
The following statement was made in French language: appeler son enfant mohammed ne l aidera pas intégrer.. c est une forme de terrorisme intellectuel... @url. Is the given statement hateful?	1	yes
The following statement was made in French language: perso j'accueillerais bien 1 migrant pour chaque nick conrad à expulser.. Is the given statement hateful?	1	yes.
The following statement was made in French language: il fait pas attardé lui en ssg. Is the given statement hateful?	0	no.
The following statement was made in French language: @user c'un attardé j'suis mort il est tellement fier. Is the given statement hateful?	1	no.
The following statement was made in French language: @user @user « nous sommes en france ».... « nous ne sommes pas en afrique » vos propos sont d’un ri… @url. Is the given statement hateful?	1	no.
The following statement was made in French language: ceux qui sont contre l'avortement sont ceux-là mêmes qui sont pour la peine de mort. Is the given statement hateful?	1	no.
The following statement was made in French language: @user @user @user s'il l'a fait c'est pour ton bien. le gauchiste sait ce qui est bon pour toi.. Is the given statement hateful?	1	no.
The following statement was made in French language: @user @user @user et que dis-tu de : qualifier de violence les dégradations ou les sabotage… @url. Is the given statement hateful?	0	no.
The following statement was made in French language: les arabes vont dire c’est l’oeil des gens @url. Is the given statement hateful?	1	no.
The following statement was made in French language: @user @user @user ouais mais si les arabes ont perdu la et pas ailleurs c'est aussi parce que nous… @url. Is the given statement hateful?	0	no.
The following statement was made in French language: bizzarement y’a que des renois qui m’insultent serai ce les plus grosses putes de l’univers? mdr. Is the given statement hateful?	1	yes.
The following statement was made in French language: avec tout ce qui s'est passé trump continue d'alimenter une théorie du complot antisémite... un pays en perdition.… @url. Is the given statement hateful?	1	no.
The following statement was made in French language: @user pq y'a autant de rebeus qui tiennent avec l'ol ?. Is the given statement hateful?	0	no.
The following statement was made in French language: @user @user @user gauche anti religieuse en général ou extreme droite anti islam tout court (pou… @url. Is the given statement hateful?	0	yes
The following statement was made in French language: en corse avec rachid.. ce soir il traité de sale arabe en direct à la télé. ..ahahah. .rachid... @url. Is the given statement hateful?	1	yes.
The following statement was made in French language: @user @user et musulmans c est vaste terrorisme voile religion fiché assise sur l islam langue… @url. Is the given statement hateful?	1	yes
The following statement was made in French language: @user @user la bonne blague. l'esclavage arabo-musulman le terrorisme et l'islamisme c'est déjà pas mal comme dégâts.. Is the given statement hateful?	1	yes.
The following statement was made in French language: @user les balkaniques font tout par la violence et la sauvagerie. ces peuples n'auront jamais la paix int… @url. Is the given statement hateful?	1	yes
The following statement was made in French language: @user j’avoue souffre trop nous étudiants renois. force à toi est ensemble !!! @url. Is the given statement hateful?	0	no.
The following statement was made in French language: en écoutant cette chanson en entier se rend compte des influences arabes grâce aux sonorités utilisées en fond.… @url. Is the given statement hateful?	0	no.
The following statement was made in French language: sasuke est bête mais naruto est attardé donc sasuke @url. Is the given statement hateful?	1	yes.
The following statement was made in French language: @user les sunnites autorisent meurtrespédophiliepolygamie violence contre les femmes etc.tous les pays… @url. Is the given statement hateful?	1	yes
The following statement was made in French language: nagui pro charia qui peut pas s'empecher de placer sa touche d'islamo gauchiste pro migrants zappe direct cette em @url. Is the given statement hateful?	0	yes
The following statement was made in French language: @user @user peut-être que certaines personne ne supportes plus que l'on s'attarde sur se genre de… @url. Is the given statement hateful?	0	no.
The following statement was made in French language: @user @user mdrrrr. t'es trop mignon. Is the given statement hateful?	0	no.
The following statement was made in French language: @user @user il est raciste mdrrr quel il veut parler des renois et il parle mal des femmes rebeu. Is the given statement hateful?	1	yes.
The following statement was made in French language: @user @user l'homme est faible physiquement par rapport l'elephant mais infiniment plus intelligent.. Is the given statement hateful?	0	no.
The following statement was made in French language: @user gros tu vas pas t’y mettre aussi? y’a des renois qui vous demandent de ne pas dire nigga dites pas nigga… @url. Is the given statement hateful?	1	yes.
The following statement was made in French language: ensemble luttons contre les violences dans nos communautés. Is the given statement hateful?	0	no.
The following statement was made in French language: @user @user rien à voir avec le terrorisme ou l'islam !! c'est un dingue qui fondu un cable !. Is the given statement hateful?	0	no.
The following statement was made in French language: @user dirait un gros daron antillais sur la derniere. Is the given statement hateful?	0	no.
The following statement was made in French language: quand demande un gauchiste d'argumenter @url. Is the given statement hateful?	0	no.
The following statement was made in French language: @user @user @user @user Ça sent le gauchiste vexé...fin de la discussion!. Is the given statement hateful?	0	no.
The following statement was made in French language: splash sur les identitaires qui pensaient tomber sur un negro stupide vos mères @url. Is the given statement hateful?	1	yes.
The following statement was made in French language: #assises du gard # l’avocat de la famille de la victime souligne l’extrême violence de l’agression. nonagénaire fr… @url. Is the given statement hateful?	0	no.
The following statement was made in French language: ce qui dégoute le+c'est que l'on nous emmerde avec les migrantsles demandeurs de papiers clandestins(qui vivent… @url. Is the given statement hateful?	0	yes
The following statement was made in French language: @user @user @user @user en inde bouffe pas de viande car ca fait des g... @url. Is the given statement hateful?	0	no.
The following statement was made in French language: les rebeus il glo à la fac grâce à la barbe. Is the given statement hateful?	0	yes
The following statement was made in French language: rt @user tous les potes de clara ils m'appellent ton pote chinois mdr c ouf g pas l'impression de tant ressembler un noich q. Is the given statement hateful?	1	no
The following statement was made in French language: @user l'endoctrinement gauchiste fonctionne plein pot sur des cliches leur pille leurs richesses le... @url. Is the given statement hateful?	0	yes
The following statement was made in French language: alors naulleau debarque ? finie la posture de gauchiste intraitable ouvert sur la diversite culturelle et incap @url. Is the given statement hateful?	0	no
The following statement was made in French language: @user j...avais grave besoin d...entendre ca merci mec !. Is the given statement hateful?	0	no.
The following statement was made in French language: @user et les rebeus haineux des renois ça existe que tu le veuilles ou pas. jv pas nier ça pr toi. Is the given statement hateful?	0	yes.
The following statement was made in French language: @user mêler islam et violence de manière systémique voilà le but... qu ils utilisent le terme terrorisme... c… @url. Is the given statement hateful?	0	no.
The following statement was made in French language: franchement j'ai regarder des reportage sur les renois qui vivent en corée ils tiennent pas du tout le même discour… @url. Is the given statement hateful?	0	no.
The following statement was made in French language: @user non le torchon national gauchiste marianne fait un article contre mechencon je revealleluia !. Is the given statement hateful?	1	no.
The following statement was made in French language: @user @user il vient juste de te prouver qu'on est au sommet et t'as confirme gros patapouf. Is the given statement hateful?	0	no.
The following statement was made in French language: @user les ultra-religieux n'ont rien contre le viol! mais contre l'avortement!. Is the given statement hateful?	1	no.
The following statement was made in French language: absolument ! il faut l'arraisonner en mer par la marine nationale arrêter tous les occupants expulser les migrant… @url. Is the given statement hateful?	1	no
The following statement was made in French language: @user nan à mon avis ta pas visité la map et ta pas chassé et tout. tu t'es plutôt attardé sur les missions pri… @url. Is the given statement hateful?	0	no
The following statement was made in French language: le parti danois qui veut expulser les “migrants musulmans qui abusent des aides sociales” se développe rapidement @url. Is the given statement hateful?	0	no.
The following statement was made in French language: une renois tu peux pas lui dire tu l'aime bien ou tu la trouve belle psk sinon dans sa tête elle va croire ces bey… @url. Is the given statement hateful?	1	yes.
The following statement was made in French language: .@user va débloquer 80 millions de dollars pour les #réfugiés et les communautés d’accueil au #niger. Is the given statement hateful?	0	no.
The following statement was made in French language: nouveau - berne : 1500 personnes à une marche contre l'avortement - #suisse #ivg #avortament #bern #ber... @url. Is the given statement hateful?	0	no
The following statement was made in French language: ilham aliyev reçoit son homologue mongol - photos @url. Is the given statement hateful?	1	no.
The following statement was made in French language: @user c'est donc ca le secret de la beaute et du bonheur eternel. Is the given statement hateful?	1	no.
The following statement was made in French language: y’a que sur twitter que les noirs font du bruit par allah dehors jamais vu un noir dire sale arabe ou l’inverse hein. Is the given statement hateful?	1	yes.
The following statement was made in French language: ce n’est pas tous les renois qui suivent son raisonnement ne l’insulte pas tu perds des hassanets pour rien @url. Is the given statement hateful?	0	no.
The following statement was made in French language: par contre les renois ou les métisses avec les taches de rousseurs ça fascine de fou @url. Is the given statement hateful?	0	no.
The following statement was made in French language: seigneur j'apprends qu'une giga pute de mon ancien lycée gueulé contre l'avortement.. Is the given statement hateful?	1	yes.
The following statement was made in French language: si la tuerie #complotiste et #antisémite de #pittsburgh frappe aujourd'hui les #usa n'oublions pas que cette idéol… @url. Is the given statement hateful?	1	no.
The following statement was made in French language: @user hahaha mais en même temps la cisphobie n'existe pas donc il pourra jamais comprendre vraiment ce que ça fait ?. Is the given statement hateful?	0	no.
The following statement was made in French language: paris: un centre d'hébergements pour réfugiés ouvre dans le 16e @url via @user… @url. Is the given statement hateful?	0	no.
The following statement was made in French language: s'il fallait décrire ce que armée policière nazi étrangère implanté e centre prisons réfugiés et essaye secret hypn… @url. Is the given statement hateful?	1	yes
The following statement was made in French language: j’ai failli postuler dans un magasin de fringues mais le fait de penser à garde-robe de bobo-gauchiste non-bina… @url. Is the given statement hateful?	1	no.
The following statement was made in French language: la préférence islamiste de la gauche est motivée par le clientélisme mais également par l’anticléricalisme.. Is the given statement hateful?	0	no.
The following statement was made in French language: du coup si les asiat et les rebeu physiquement ne m'attirent pas trop je suis aussi raciste des asiat et des rebeu… @url. Is the given statement hateful?	0	yes.
The following statement was made in French language: @user augmentation des violences proportionnelle à l'arrivée de migrants africains illégaux en france. paris e… @url. Is the given statement hateful?	1	yes
The following statement was made in French language: en israël les migrants africains se sentent victimes de « racisme » - @url @url. Is the given statement hateful?	0	no.
The following statement was made in French language: le problème des migrants c'est comme un moustique sur un testicule la violence ne sert à rien.... Is the given statement hateful?	1	yes.
The following statement was made in French language: @user ouais askip tu aurait sorti sale juif selon les dires de zeuby. Is the given statement hateful?	0	yes.
The following statement was made in French language: @user @user ceux là méritent même pas qu'on s'attarde dessus ..j'vais pas faire unanimité là dessus… @url. Is the given statement hateful?	0	no.
The following statement was made in French language: moi j'ai personne à qui m'adresser pour réclamer. le voisin c'est un attardé puant et bruyant dans les administrat… @url. Is the given statement hateful?	1	yes.
The following statement was made in French language: il est capable de te lâcher un sale arabe ou un sale nègre sous l'effet de la colère au premier degré... j'ai u… @url. Is the given statement hateful?	1	yes
The following statement was made in French language: @user @user oui il n ya pas de grd remplacement ni de racisme anti blanc ! c tjr arabe noir jeune en s… @url. Is the given statement hateful?	0	yes
The following statement was made in French language: @user waw jvai te défoncer jiji tu parles comme ça toi qui aime la violence jv te briser grosse pomme de terre va. Is the given statement hateful?	1	yes.
The following statement was made in French language: migraction 59 en faveur des migrants de calais @url via @user. Is the given statement hateful?	1	no.
The following statement was made in French language: À genève hein.. tu crois qu’on est aussi debile que toi ici pauvre attardé que t’es. va falloir aller ramasser la s… @url. Is the given statement hateful?	1	yes.
The following statement was made in French language: réponse type de gauchiste sur le scandale #nickconrad : je condamne mais.... Is the given statement hateful?	1	no.
The following statement was made in French language: @user @user le négationnisme du racisme anti-blanc de l'islamo-gauchiste @user la même argume… @url. Is the given statement hateful?	1	yes.
The following statement was made in French language: contre l'immigration et l'islamisation de la france la seul parti qui défend la france c'est le rn (et dlf) @url. Is the given statement hateful?	1	yes.
The following statement was made in French language: @user tu sauras que ca s'appelle la chaine alimentaire apprend ca l'ecole. Is the given statement hateful?	0	no.
The following statement was made in French language: @user ne t'attarde pas là dessus!. Is the given statement hateful?	0	no.
The following statement was made in French language: @user sale arabe arrête d'envahir nos pays violer nos filles et voler notre travaille !. Is the given statement hateful?	1	yes.
The following statement was made in French language: @user en fait quand s'attarde un peu sur les tweets de ce compte.... Is the given statement hateful?	0	no.
The following statement was made in French language: tu préfères aller en soirée avec l'autre con de zoonekynd où aller en cours avec l'autre mongol de mahieux? — alex… @url. Is the given statement hateful?	0	yes.
The following statement was made in French language: @user qu'il soit déguisé en arabe en noir en juif ou je sais pas quoi j'm'en branle. mais là le déguiseme… @url. Is the given statement hateful?	1	yes
The following statement was made in French language: @user @user @user cette vue ou le regard s'attarde et dessine des caresses. Is the given statement hateful?	0	no.
The following statement was made in French language: #hapsatousy - #zemmour ou la parfaite illustration de ce que dénonce #zemmour : l'hystérie la dictature le terror… @url. Is the given statement hateful?	1	no
The following statement was made in French language: @user l’extrême droite est au pouvoir(«police coupe semelles enfants migrants ment sur âge pour expulser...»)… @url. Is the given statement hateful?	1	no.
The following statement was made in French language: @user c’est comme si tu disais islam =terrorisme. Is the given statement hateful?	0	no.
The following statement was made in French language: feuilleton bêtisier (3)cohn bendit parlant de jlm un complotiste anti macronien normal vu sa formation trotzkiste… @url. Is the given statement hateful?	1	no.
The following statement was made in French language: les renois déjà je vous aime trop ensuite jsp c’est vraiment au feeling @url. Is the given statement hateful?	0	no.
The following statement was made in French language: le renois trompent beaucoup les blancs trompent mieux. mdr waow keske j'raconte moi. Is the given statement hateful?	1	yes.
The following statement was made in French language: @user @user quand j'etais gamin mon meilleur pote était juif. je ne l'ai su que lorsqu'un maghrébin l'a… @url. Is the given statement hateful?	0	no.
The following statement was made in French language: @user @user yes je le suis mais j’ai l’impression les noir d’afrique c’est que ceux de l’est ici. Is the given statement hateful?	0	no.
The following statement was made in French language: @user @user selon toi doit laisser les enfants se traiter l'autre de sale arabe ou de sale blanche ? drôle d'éducation. Is the given statement hateful?	1	yes.
The following statement was made in French language: ferme ta geule connasse avec tes chansons rebeus si tu veux vivre comme ça etc rentre chez toi ici est en france #udpp. Is the given statement hateful?	1	yes.
The following statement was made in French language: voilà pourquoi le problème des noirs et des arabes en france il finira jamais est trop diviser wesh des que y’a… @url. Is the given statement hateful?	0	yes
The following statement was made in French language: le juif : bonnes fêtes de roch hachana. Is the given statement hateful?	1	no.
The following statement was made in French language: tout les jours negro c'est fridayyyyyyyy. Is the given statement hateful?	0	no.
The following statement was made in French language: @user @user citation du responsable de l'etude que tu n'as sans doute pas lu : c'est vrai qu'... @url. Is the given statement hateful?	0	no.
The following statement was made in French language: rt @user @user @user mdrrrr. t'es trop mignon. Is the given statement hateful?	0	no.
The following statement was made in French language: les attaques terroristes racistes antimusulmans; ne sont que rarement qualifiées de terrorisme. https:…. Is the given statement hateful?	0	no.
The following statement was made in French language: @user de la thune pour les migrants...y de la thune... français d’abord ! pour nos aînés priorité nationale !. Is the given statement hateful?	0	no
The following statement was made in French language: @user @user exemple tout bete. Is the given statement hateful?	0	no.
The following statement was made in French language: @user oui cela s'appelle la colonisation et l'islamisation d'une nation avec l'aval de nos gouvernements soumis à l'ue.. Is the given statement hateful?	0	no.
The following statement was made in French language: grèce: les transferts de réfugiés et migrants vers le continent s’accélèrent @url @url. Is the given statement hateful?	1	no.
The following statement was made in French language: et ça ne dérange personne que l'on parque les migrants comme du bétail ???? @url. Is the given statement hateful?	0	no.
The following statement was made in French language: @user assia vallah j’ai plus rien à perdre je fait déjà terminer depuis mon tweet sur les rebeus. Is the given statement hateful?	0	no.
The following statement was made in French language: @user mais soma gros mongol cinnamon c’est quoi?. Is the given statement hateful?	0	no.
The following statement was made in French language: bah non mais les rebeus aussi ont une grosse bite — bon tg @url. Is the given statement hateful?	1	yes.
The following statement was made in French language: @user @user lors de ces sommets rappeler que les africains et les indonésiens ne doivent plus ex… @url. Is the given statement hateful?	0	no.
The following statement was made in French language: quel frère (il écrit mieux rebeu que des rebeus) @url. Is the given statement hateful?	0	no.
The following statement was made in French language: @user ah ? jsp j'ai bloque direct cmb ?. Is the given statement hateful?	1	no.
The following statement was made in French language: @user corrente de mongol. Is the given statement hateful?	0	yes.
The following statement was made in French language: @user merci theo aka brainless connu sous le pseudonyme du plus beau de tous les rebeus ... Is the given statement hateful?	0	no.
The following statement was made in French language: @user surtout les arabes. ils sont parfait pour le sport en plus ce sont des buveurs de vent avec leurs… @url. Is the given statement hateful?	1	yes
The following statement was made in French language: @user @user mais de quelle transition tu parle ? que tout le monde devienne vegan ? pourquoi v... @url. Is the given statement hateful?	0	no
The following statement was made in French language: et le président iranien lors de son discours annuel à l’onu va se plaindre du danger du terrorisme au lieu d’êt… @url. Is the given statement hateful?	0	no
The following statement was made in French language: tous les potes de clara ils m'appellent ton pote chinois mdr c ouf g pas l'impression de tant ressembler un noich que ca????. Is the given statement hateful?	0	no
The following statement was made in French language: l'islam n'est pas le terrorisme... je veux dire l'extrémisme et il existe dans toutes les re… @url. Is the given statement hateful?	0	no
The following statement was made in French language: @user un jour t’avais dis t’aimes bien les renois sur twitter je m’en rapl très bien et puis même en vrai tu… @url. Is the given statement hateful?	0	no.
The following statement was made in French language: @user @user @user les bonnes larmes de gauchiste. Is the given statement hateful?	0	no.
The following statement was made in French language: @user @user @user @user @user juste un gauchiste toujours à donner des leçons de morale. Is the given statement hateful?	0	yes
The following statement was made in French language: @user #stop aux complots #stop aux guerres des intÉrÊts economiques &amp; politiques #stop aux machiavÉlisme.… @url. Is the given statement hateful?	0	no.
The following statement was made in French language: @user @user comment vous pouvez oser écrire ces choses la ? donc en gros les arabes en demandent tr… @url. Is the given statement hateful?	0	no.
The following statement was made in French language: @user @user @user l'islam n'est pas le terrorisme....mes tous les terroristes pratiques l'islam.... attentats islam..... Is the given statement hateful?	1	yes
The following statement was made in French language: algérie: «les migrants sont beaucoup plus vulnérables maintenant» pour leïla berrato - @url. Is the given statement hateful?	0	no.
The following statement was made in French language: @user remarque la photo elle peut donner un putain de scénario de film : 4 renois et leur beurette à chicha. Is the given statement hateful?	0	yes.
The following statement was made in French language: @user mdr personnellement je ne m’attarde pas next directe.. Is the given statement hateful?	0	no.
The following statement was made in French language: @user la lecture de ceci interroge grandement pour elle l’alcool est une des complications de la violence fa… @url. Is the given statement hateful?	0	no.
The following statement was made in French language: @user @user @user ben exactement. Is the given statement hateful?	0	no.
The following statement was made in French language: (charente libre): l'#italie adopte une loi pour expulser plus vite les migrants : le conseil des ministres italie… @url. Is the given statement hateful?	0	no.
The following statement was made in French language: @user j’aurais aimé le voir se fr lyncher pr de vrai les arabes et les noirs ca comptes pr du beurres mais… @url. Is the given statement hateful?	1	yes.
The following statement was made in French language: #pmasanspère : au nom du désir tout puissant des adultes sur les enfants permet cette violence sur leur identité profonde.. Is the given statement hateful?	0	no.
The following statement was made in French language: mur anti-migrants au sahara : l'idée renversante de trump @url. Is the given statement hateful?	0	no.
The following statement was made in French language: @user ptdrr ta tous les renois de châtelet ils vont arriver en ball. Is the given statement hateful?	0	no.
The following statement was made in French language: qué mongol ce germain il court jusqu’au champs Élysée au lieu de rester placé devant les cages. Is the given statement hateful?	0	no
The following statement was made in French language: le sénateur pillon est contre l’avortement contre le mariage gay contre le divorce et contre les pensions aliment… @url. Is the given statement hateful?	1	no.
The following statement was made in French language: @user @user l’islamisation en marche ! la pauvreté généralisée partout en france.. Is the given statement hateful?	1	yes
The following statement was made in French language: @user pareilj’aime pas voir les gens malheureuxmême ceux que je connais pas vraimentje m’attarde toujours u… @url. Is the given statement hateful?	0	no.
The following statement was made in French language: @user @user @user @user oui et alors ou est le probleme j'ai cite l'inde pa... @url. Is the given statement hateful?	0	no.
The following statement was made in French language: @user un beau musée dans lequel le nom des bourreaux sera caché ! le seul terrorisme que nous connaissons porte un nom : l’islam. Is the given statement hateful?	1	yes.
The following statement was made in French language: @user quand il n'est plus possible d'établir des liens de confiance avec les institutions la violence n'est p… @url. Is the given statement hateful?	0	no.
The following statement was made in French language: @user @user si tu considère que c'est la nature je pense que tu es contre l'avortement bien entendu ?. Is the given statement hateful?	0	no.
The following statement was made in French language: nous les noirs les rebeus veut tous les éradiq… @url. Is the given statement hateful?	1	yes
The following statement was made in French language: les renois vous abusez à tomber au milieu de la piste de bowling. Is the given statement hateful?	1	yes
The following statement was made in French language: @user exactement xd comme tu es un ami précieux je m'attarde beaucoup sur ce genre de détails xd. Is the given statement hateful?	0	no.
The following statement was made in French language: allemagne : les clans arabes font la loi..... Is the given statement hateful?	1	no.
The following statement was made in French language: je viens de découvrir le mode nuit de twitter je suis vraiment une attardé. Is the given statement hateful?	1	no.
The following statement was made in French language: voilà qui démontre bien l'hypocrisie de la gauche... pas plus haineux et violent qu'un gauchiste extrémiste! @url. Is the given statement hateful?	0	yes.
The following statement was made in French language: @user @user ouaip c'est dur comprendre dans le 16eme paris intramuros quand les seuls vac... @url. Is the given statement hateful?	0	no.
The following statement was made in French language: kevin il se bat avec tous les rebeus avec une moustache pr mieux froisser berka #verité. Is the given statement hateful?	1	yes.
The following statement was made in French language: @user pour moi l'insignifiance ne mérite pas qu'on s'y attarde!!. Is the given statement hateful?	0	no.
The following statement was made in French language: @user @user grosso modo les ouïghours sont un peuple turc (ou turco-mongol) et musulman. bien s… @url. Is the given statement hateful?	0	no.
The following statement was made in French language: @user @user c'est bien connu. Is the given statement hateful?	0	no.
The following statement was made in French language: ferme la gros mongol retourne tweeter de la merde @url. Is the given statement hateful?	1	yes.
The following statement was made in French language: @user @user un lion ne mange pas que de la viande meme si c...est l...essentiel pour lui. donc cal... @url. Is the given statement hateful?	0	no.
The following statement was made in French language: @user @user @user ah d'accord je ne m'avais pas attardé sur le compte. je crois que moi simp… @url. Is the given statement hateful?	0	no.
The following statement was made in French language: @user lui c’est un sale arabe ... Is the given statement hateful?	0	yes.
The following statement was made in French language: les vegans sont-ils contre l'avortement ?. Is the given statement hateful?	1	no.
The following statement was made in French language: entre les colis pieges fabriques par cesar sayoc l'ultra-droite peut critiquer l'electorat gauchiste democrate ame @url. Is the given statement hateful?	0	no.
The following statement was made in French language: @user mdrr bah non ah je sais pas trop je t'avoue que je m'attarde pas trop sur leur profil haha. Is the given statement hateful?	0	no.
The following statement was made in French language: tout est noir quand mes negro refusent de rentrer dormir #ceweekendilsvonttropabuser. Is the given statement hateful?	1	no
The following statement was made in French language: @user cet attardé mental il même pas un diplôme. donnez son emploi à un chômeur.. Is the given statement hateful?	1	yes.
The following statement was made in French language: @user les gens se sentent tous visés ! c’est une secte alors ? comme les blacks les arabes les instits.... Is the given statement hateful?	0	yes.
The following statement was made in French language: les renois sa mère ils payent jamais les taxis. Is the given statement hateful?	1	yes.
The following statement was made in French language: @user @user pourquoi des pays très riches comme l'arabie saoudite le qatar les Émirats arabes etc. ne le… @url. Is the given statement hateful?	0	no.
The following statement was made in French language: @user @user pour gagner du temps notons dès à présent que c'est le lobby juif qui contrôle à la fois :. Is the given statement hateful?	1	yes
The following statement was made in French language: @user @user ptn cette violence de la question mdr. Is the given statement hateful?	0	no.
The following statement was made in French language: @user l'africanisation et l'islamisation de l'europe c'est l'importation des mœurs qui sont associées. n… @url. Is the given statement hateful?	1	no.
The following statement was made in French language: @user comme d'habitude !! pauvre petit bonhomme !!! il n'y pas d'élections en afrique ?? vous se… @url. Is the given statement hateful?	0	no
The following statement was made in French language: @user j’avais bien fait de l’unfollow quand je voyais ces tweets bizarres sur les arabes mais à ce moment là… @url. Is the given statement hateful?	0	no.
The following statement was made in French language: @user @user @user machin à lunettes va se faire une fois ramasser par des migrants et il pleurera. fran… @url. Is the given statement hateful?	0	yes.
The following statement was made in French language: 1 - que des prénoms arabes.. Is the given statement hateful?	1	no.
The following statement was made in French language: ce sont plutot les collabos gauchiste qui avaient tourne les yeux de leurs pauvres congeneres causes d'eux des mi @url. Is the given statement hateful?	1	yes
The following statement was made in French language: @user @user il faut arrêter le discours stupide et humanotaro-gauchiste qui consiste à importer la gue… @url. Is the given statement hateful?	1	yes
The following statement was made in French language: meilleur que thiago messi voila c'est terminenc'est un crack le meilleur attarde du siecle c'est bien lui il est @url. Is the given statement hateful?	0	no.
The following statement was made in French language: @user @user @user ah oui ? et ca c...est quoi ? @url. Is the given statement hateful?	0	no.
The following statement was made in French language: contre l'avortement soutenons le docteur bertrand de rochambeau @url. Is the given statement hateful?	0	no.
The following statement was made in French language: que tu sois pour ou contre l’avortement c’est le droit de chacun mais ne doit pas mêler ses convictions personne… @url. Is the given statement hateful?	0	no.
The following statement was made in French language: @user l'avortement n'est pas forcément traumatisant non la grossesse forcée par contre... encore une fois… @url. Is the given statement hateful?	0	no.
The following statement was made in French language: @user calais les migrants viols et agresse même les habitants qui leur vienne en aide à cause de ça les habitants quitte calais. Is the given statement hateful?	0	yes
The following statement was made in French language: «la montée des populismes s’explique par cette peur des migrants clandestins» @url. Is the given statement hateful?	1	no.
The following statement was made in French language: @user @user tg fdp sale chien sale juif gaz encetr. Is the given statement hateful?	1	yes.
The following statement was made in French language: @user @user @user c'est dingue ce terrorisme intellectuel! vous avez le même prénom certes mais… @url. Is the given statement hateful?	0	no.
The following statement was made in French language: rt @user l'histoire du quebec vaut la peine qu'on s'y attarde. tellement triste qu'on ne l'enseigne presque plus. texte fort interessa. Is the given statement hateful?	0	no.
The following statement was made in French language: jviens de tomber sur un compte twitter c'est insane putain le mec c'est un attarde avec un balais sur la tete avec @url. Is the given statement hateful?	0	no.
The following statement was made in French language: @user le tweet comme l'article ne s'attardent pas beaucoup sur ce que ça pourrait changer d'avoir un européen… @url. Is the given statement hateful?	0	no.
The following statement was made in French language: antisémite complotiste et anti-trump… qui est l’auteur de la fusillade qui fait onze morts dan... @url. Is the given statement hateful?	0	yes.
The following statement was made in French language: l'attardé de moroni. Is the given statement hateful?	0	yes
The following statement was made in French language: @user vivement qu’on s’attarde aux pratiquants de water-polo et de twirling bâton. ce sont deux passions bie… @url. Is the given statement hateful?	0	no.
The following statement was made in French language: @user ce mec est de la origine que toi et ti parle mdrr sale arabe. Is the given statement hateful?	1	yes.
The following statement was made in French language: s'imaginer que l'#africain vient en #europe n'est qu'un pur fantasme étant donné que 90% des #migrants africains re… @url. Is the given statement hateful?	1	no
The following statement was made in French language: @user j'aurais dis pareil avc les renois t'aurais rep la meme?. Is the given statement hateful?	0	yes
The following statement was made in French language: quand je sors de chez le coiffeur j’suis vraiment le plus beau de tous les rebeus. Is the given statement hateful?	0	no.
The following statement was made in French language: islamo -gauchiste qui ne peut être élu que lorsque le communautarisme est majoritaire ! @url. Is the given statement hateful?	1	yes
The following statement was made in French language: @user encore les méchants blancs oppresseurs qui n'ont que ce qu'ils méritent. le logiciel gauchiste est resté… @url. Is the given statement hateful?	1	yes.
The following statement was made in French language: @user @user du coup pourquoi l'evolution fait qu'on des canines si est destine bouffer... @url. Is the given statement hateful?	0	no.
The following statement was made in French language: pittsburgh : le poison de l’antisémitisme encore tué (pcf). Is the given statement hateful?	1	no.
The following statement was made in French language: @user comme quoi c'est bien un gauchiste de la pire espèce.. Is the given statement hateful?	1	yes.
The following statement was made in French language: l'islamisation de la france en pleine expansionle résultat de l'infiltration des musulmans ds ts les strates de la… @url. Is the given statement hateful?	0	no
The following statement was made in French language: @user c’est sale arabe tous les mêmes j’ai envie de les gifler. Is the given statement hateful?	1	yes.
The following statement was made in French language: @user /o je sais pas. je comprends pas. j'en ai marre. va encore se reprendre toute cette violence dans la gueule. #lassitude. Is the given statement hateful?	0	no.
The following statement was made in French language: sai ciume mongol. Is the given statement hateful?	1	yes
The following statement was made in French language: @user 1 mongol. Is the given statement hateful?	0	yes.
The following statement was made in French language: @user un témoin de l'empreinte des presque trois cents ans d'existence cumulées de l'empire mongol et de la horde d'or.. Is the given statement hateful?	0	no.
The following statement was made in French language: @user @user un gauchiste qui préfère essayer de récupérer les dernières voies des socialistes en fe… @url. Is the given statement hateful?	0	no.
The following statement was made in French language: il m'arrive un truc comme ça j'accélère comme un mongol et j'ecrase des gens m'en balek (je pleure race en vrai) @url. Is the given statement hateful?	0	yes.
The following statement was made in French language: les maghrébines qui sont attirés par les renois elles sont comme les lgbt obligé de le revendiqué.. Is the given statement hateful?	1	yes.
The following statement was made in French language: @user @user @user c'est pas les migrants qui viennent piquer le travail des français c'est les t… @url. Is the given statement hateful?	0	yes
The following statement was made in French language: non non disent les pauvres bobos gauchistes déjà soumis à l'islam.... Is the given statement hateful?	1	yes
The following statement was made in French language: les marocains ils debate avec un mongol qui croit que lportugal c en amérique du nord jsp cmt vs pouvez tenir jlaur… @url. Is the given statement hateful?	0	no.
The following statement was made in French language: @user @user est au niveau de l...anchois au niveau de la chaine alimentaire. ridiculise toi encore plus. Is the given statement hateful?	0	yes
The following statement was made in French language: si zemmour disait la vérité le terrorisme se réclame de l'islam il n'aurait pas pu finir sa phrase. onpc se couc… @url. Is the given statement hateful?	0	no
The following statement was made in French language: la banque mondiale va débloquer 80 millions de dollars pour les réfugiés et les communautés d’accueil au #niger.… @url. Is the given statement hateful?	0	no.
The following statement was made in French language: les renois et les rebeus qui créent la division entre les communautés devrait vous enfermer dans des goulags. Is the given statement hateful?	1	yes.
The following statement was made in French language: @user ouais clairement et surtout que ca sera que scientifique. Is the given statement hateful?	0	no.
The following statement was made in French language: des noirs au milieu des rebeus pour la technique c’est mon lyon ça @url. Is the given statement hateful?	1	yes
The following statement was made in French language: @user brefffffffffff je m’attarde plus psq vous aller rester sur votre point de vue et moi sur le mien donc au revoir. Is the given statement hateful?	1	no.
The following statement was made in French language: gare aux propos islamophobes les facho de gauche et de droite. l'islam est une belle religion de paix et de partag… @url. Is the given statement hateful?	1	no
The following statement was made in French language: @user À toulouse oui dans la rue le commissariat et plus que d'entendre sale noir ou arabe.... Is the given statement hateful?	0	no.
The following statement was made in French language: @user @user @user pas le temps ! le gouvernement est déjà assez occupé comme ça avec les migrants islamo-africains !. Is the given statement hateful?	0	yes
The following statement was made in French language: cyber-harcèlement: un jeune homme de 25 ans reconnu coupable de viol à distance @url via @user. Is the given statement hateful?	0	no.
The following statement was made in French language: rt @user quand voit le carnage de maduro le gauchiste prefere de melenchon ude4c @url. Is the given statement hateful?	1	no.
The following statement was made in French language: @user Être de gauche voir gauchiste n'est pas un crime non plus.. Is the given statement hateful?	0	no.
The following statement was made in French language: bensebaini quel gros mongol il mérite un beau pied bouche. #srfcpsg. Is the given statement hateful?	1	yes.
The following statement was made in French language: @user @user je suis actuellement en amerique je suis en high school et depuis le debut de l...an... @url. Is the given statement hateful?	0	no.
The following statement was made in French language: @user c bon tg tu force sale arabe. Is the given statement hateful?	1	yes.
The following statement was made in French language: des #migrants clandestins armés s'affrontent devant la fac d'éco-gestion à #marseille. les expulser est une urgence… @url. Is the given statement hateful?	0	no
The following statement was made in French language: les #lrem et les gauchiste se défoulent sur @user qui ose parler de l'immigration comme un problème... Is the given statement hateful?	0	no.
The following statement was made in French language: @user oui très bien! mais du coup je ne vois toujours pas la corrélation avec les migrants africains. ^^. Is the given statement hateful?	0	no.
The following statement was made in French language: @user c'est un acte antisémite mais le mot n'est pas facile à prononcer car l'auteur n'est ni noir ni arab… @url. Is the given statement hateful?	1	yes.
The following statement was made in French language: @user @user ils veulent ça des bons petits rebeus de maison. Is the given statement hateful?	0	yes.
The following statement was made in French language: c'est moi attardé ! je suis tombé !. Is the given statement hateful?	1	no.
The following statement was made in French language: @user @user pck il tape tjr des actions de renois griezmann. Is the given statement hateful?	1	yes.
The following statement was made in French language: ah ouin t’es contre l’avortement sais-tu c’est quoi une vasectomie. Is the given statement hateful?	1	no.
The following statement was made in French language: @user les gens ont grandi s'attarde plus sur ces trivialites de changement d'heure les vrais les purs sont... @url. Is the given statement hateful?	0	no.
The following statement was made in French language: prenez moi pour cque vous voulez mais le délire des meufs rebeus en france c’est vraiment ce qu’il de plus dégo… @url. Is the given statement hateful?	1	yes
The following statement was made in French language: mdr les rebeus discrets les connais t’inquiètes @url. Is the given statement hateful?	1	no.
The following statement was made in French language: @user ça change pas que qd mm un mongol. Is the given statement hateful?	0	yes.
The following statement was made in French language: @user si des arabes te disent que nous sommes coupables c’est sûrement que nous nous sommes innencents. Is the given statement hateful?	1	no.
The following statement was made in French language: moi je trouve que yann moix n’a pas dérapé sur la question de la violence policière. biensur que yena et ok faut pa… @url. Is the given statement hateful?	0	no
The following statement was made in French language: #hdespros @user vient sur votre plateau comme tout gauchiste qui veut imposer son discours. ils font de… @url. Is the given statement hateful?	1	yes.
The following statement was made in French language: d’où sont originaires la plupart des #réfugiés ? les deux tiers des réfugiés proviennent de cinq pays seulement :… @url. Is the given statement hateful?	0	no.
The following statement was made in French language: @user @user rennes ....ville gauchiste depuis 1977 sans interruption. Is the given statement hateful?	0	no.
The following statement was made in French language: les nouvelles yeezy elle pue sa grand mère c’est pour les renois pour les rebeus gile-fra suceur de bite et qui suivent la mode. Is the given statement hateful?	1	yes.
The following statement was made in French language: @user @user @user le drapeau israélien indique donc votre attachement au foyer juif et par là… @url. Is the given statement hateful?	0	no.
The following statement was made in French language: @user @user @user toujours les mêmes poncifs 1) la non violence est une position moral… @url. Is the given statement hateful?	0	no.
The following statement was made in French language: il dit ça en faisant valoir le vocabulaire de la gauche attardé qui nous entoure depuis tant d'années.. Is the given statement hateful?	0	yes.
The following statement was made in French language: genre jai envoye seance dmuscu sur snap un gar dit ta mere sale arabe avc ton vieux chanteur en parlant de ch… @url. Is the given statement hateful?	1	yes
The following statement was made in French language: @user @user je ne suis pas gauchiste. plutot droite... mais ca n'a pas de rapport avec ca. ce que je dis... @url. Is the given statement hateful?	0	no.
The following statement was made in French language: #muslims #islamisation #grandremplacement… @url. Is the given statement hateful?	1	yes.
The following statement was made in French language: plus bas tu dis que tu ne pourrais pas sortir avec autre qu’une rebeu et la d’un coup les indiennes et les renois ç… @url. Is the given statement hateful?	0	yes.
The following statement was made in French language: rt @user meilleure amie sort avec un enfant attarde qui aime la neige... @url. Is the given statement hateful?	0	no.
The following statement was made in French language: @user personnellement mon regard s'attarde de moins en moins sur ce genre de couverture. je pense que mon… @url. Is the given statement hateful?	0	no
The following statement was made in French language: @user mais encore ? un jour il faudra faire une étude sociologique sur le tropisme gauchiste / socialiste… @url. Is the given statement hateful?	0	no.
The following statement was made in French language: soutenons les patriotes allemands qui comme nous luttent contre l'islamisation de nos pays et la destruction de not… @url. Is the given statement hateful?	1	yes
The following statement was made in French language: 40 années de laxisme gauchiste !!!! @url. Is the given statement hateful?	1	yes
The following statement was made in French language: zemmour aphatie radicalité de l'un terrorisme intellectuel de l'autre ... une maladie: les idéologies une vic… @url. Is the given statement hateful?	1	no
The following statement was made in French language: les arabes presque réussis à vous faire croire que dans le coca il de la cocaine et que israël faisait un complot avec cette boisson. Is the given statement hateful?	1	yes
The following statement was made in French language: @user ptydttyddtrrtdd un ouf toi tu mprends pour un sale arabe. Is the given statement hateful?	1	yes.
The following statement was made in French language: @user mddrrrrr trop de violence. Is the given statement hateful?	0	no.
The following statement was made in French language: @user si faisait des généralités comme ça sur les renois ça serait appellé de la discrimination et tu le… @url. Is the given statement hateful?	0	yes.
The following statement was made in French language: imaginez seulement si ses enfants préfèrent sortir avec des renois reubeu ou asiat @url. Is the given statement hateful?	1	yes
The following statement was made in French language: @user @user ah ben cest difficile quand connait que les smartphones le beton et les immeubles. Is the given statement hateful?	0	no.
The following statement was made in French language: d'après @user la police ferait mieux son travail s'il avait plus d'arabes et noirs parmi les policier… @url. Is the given statement hateful?	1	yes.
The following statement was made in French language: @user une féministe qui te parle d'irl.. Is the given statement hateful?	0	no.
The following statement was made in French language: @user faut passer outre . c'est pareil pour moi je m'y attarde peu .... Is the given statement hateful?	0	no.
The following statement was made in French language: #immigration #islam quand les clans arabes font la loi en allemagne. tant de laxisme fait vomir. lire. @url. Is the given statement hateful?	1	yes.
The following statement was made in French language: @user quand je suis parti 4 mois en afrique cette année je suis rentré et chienne était toute heureuse donc t’en fais pas. Is the given statement hateful?	0	no.
The following statement was made in French language: rt @user @user @user @user @user je suis une gauchiste libertaire et catholique pas tres orthodoxe. Is the given statement hateful?	1	no.
The following statement was made in French language: les sud-coréennes ne veulent pas de migrants ! @url via @user. Is the given statement hateful?	1	no.
The following statement was made in French language: muriel robin se confie sur son combat contre les violences conjugales devenu une évidence après avoir incarné jacq… @url. Is the given statement hateful?	0	no.
The following statement was made in French language: mdrr le mec parle des bites de noirs ça se voit il connaît pas les teubs des rebeus — bon ça est mdrrrr stop @url. Is the given statement hateful?	1	yes.
The following statement was made in French language: liverpool l’islam le psg le terrorisme fuck nasser. Is the given statement hateful?	1	yes
The following statement was made in French language: @user c'est totalement le cas deja essaye de prononcer ca la tele et tu verras c'est un peu comme l'expression gauchiste. Is the given statement hateful?	1	no.
The following statement was made in French language: @user @user je ne renie pas ce que je suis je mange de tout. je mangerai bien du gauchiste bobo mais j'ai… @url. Is the given statement hateful?	1	no.
The following statement was made in French language: vos renois d’1m95 110kg qui lâchent des tweets fruités dirait makassy. Is the given statement hateful?	0	no.
The following statement was made in French language: intelligence d'un ado attardé !!! @url. Is the given statement hateful?	0	yes.
The following statement was made in French language: Évidemment un bon gauchiste ça faydeuxtweets et après ça n’a plus d’arguments sinon il se contredit lui même... … @url. Is the given statement hateful?	1	no.
The following statement was made in French language: donc là vient vraiment de sortir dans la rue « t’es raciste sale arabe? » ? grenoble c épatant. Is the given statement hateful?	1	yes.
The following statement was made in French language: @user salut les islamotrump ! demande juste nous les gauchiste que vous gardiez votre foi pour vous.... @url. Is the given statement hateful?	1	yes.
The following statement was made in French language: @user ce sont les mêmes qui font la morale contre l'avortement..... Is the given statement hateful?	1	no.
The following statement was made in French language: voici ce que fait macron en ce moment il applique un plan diabolique d’islamisation de la france réveillez vous mer… @url. Is the given statement hateful?	1	yes
The following statement was made in French language: @user j’suis le renois le plus gentil au monde... Is the given statement hateful?	0	no.
The following statement was made in French language: t’aime pas les meufs renois ? — bah pourquoi je les aimerai pas ? @url. Is the given statement hateful?	1	no.
The following statement was made in French language: look de coctktail en blanco negro @url. Is the given statement hateful?	0	no.
The following statement was made in French language: @user lis surtout les papiers signés par @user @user et philippe leclercq. ne t'attarde p… @url. Is the given statement hateful?	0	no
The following statement was made in French language: @user @user d'accord le gauchiste.. Is the given statement hateful?	0	no.
The following statement was made in French language: @user moi hamdoullah je vis dans un pays africain donc mon prenom va pas deranger mais les gens qui ont du mal a… @url. Is the given statement hateful?	0	no.
The following statement was made in French language: @user @user @user c...est vous qui parlez de vue gauchiste avilissante. pas moi. vous associez cette... @url. Is the given statement hateful?	0	no
The following statement was made in French language: @user @user il serait peut être temps que je m’y attarde alors. Is the given statement hateful?	0	no.
The following statement was made in French language: @user @user merci pour cet échange. vous n'aimez pas les arabes dite le clairement. bonne journée.. Is the given statement hateful?	0	yes.
The following statement was made in French language: rt @user @user @user @user @user @user bonjour je suis un gauchiste bobo et je reveille apre. Is the given statement hateful?	1	no.
The following statement was made in French language: @user @user @user @user @user @user c’est ouf comment les rebeus de qua… @url. Is the given statement hateful?	0	yes.
The following statement was made in French language: rt @user y'a une meuf dans classe elle se pleins du racisme envers les arabes mais taleur elle traiter un asiatique de ching cho. Is the given statement hateful?	1	yes.
The following statement was made in French language: le secours catholique ardent promoteur de l'ensauvagement et de l'islamisation de l'europe ! son catholicisme dévo… @url. Is the given statement hateful?	1	yes
The following statement was made in French language: @user j...ai bien une petite idee mais va traiter de gauchiste.... Is the given statement hateful?	0	no.
The following statement was made in French language: @user @user tiens encore cette théorie du complot antisémite.... Is the given statement hateful?	0	yes.
The following statement was made in French language: entre vals et moix la france perd..... euh pas grand chose en fait. exile les réfugiés qu'on peut. @url. Is the given statement hateful?	1	yes.
The following statement was made in French language: @user @user @user @user @user et la société complète cautionne la violence de l'au… @url. Is the given statement hateful?	0	no.
The following statement was made in French language: Ça enlevez ça localisation pour allez voir renois1 et pcq elle ce localise avec renois 2 vu que y’a pas trop de con… @url. Is the given statement hateful?	1	yes.
The following statement was made in French language: @user Ça les attires pas les rebeus. Is the given statement hateful?	1	yes.
The following statement was made in French language: libye: plus de 100 morts dans le naufrage de deux bateaux de migrants @url. Is the given statement hateful?	0	no.
The following statement was made in French language: mdrr fallou mongol un vrai saï saï regardez le deal qu’il pose à l’animatrice... @url. Is the given statement hateful?	1	no.
The following statement was made in French language: @user j’vous soutient grv franchement force vous parle des rebeus et arabes mais en soit vous etes les… @url. Is the given statement hateful?	0	no.
The following statement was made in French language: nous les noirs les rebeus veut tous les éradiquer…. Is the given statement hateful?	1	yes.
The following statement was made in French language: un mélange flou entre qqun empli d’amour et de violence le paradoxe à son paroxysme l’art pas pour sa beauté mai… @url. Is the given statement hateful?	0	no.
The following statement was made in French language: c’est juste là tu t’affiche à sucer les rebeus te le dit pas mais moi je te le dis à ta place j’aurais honte — m… @url. Is the given statement hateful?	0	yes.
The following statement was made in French language: êtes vous pour ou contre l’avortement ?. Is the given statement hateful?	0	no.
The following statement was made in French language: novembre au hourdel le soleil s’attarde les phoques en profitent nous aussi ! @url. Is the given statement hateful?	0	no.
The following statement was made in French language: dieu ne s’attarde jamais à combler un besoin extérieur.. Is the given statement hateful?	0	no.
The following statement was made in French language: il encore des gens en 2018 qui lâche des sale arabe de merde dans la rue et qui trouve ça normal. l'ignorance nous tuera tous.. Is the given statement hateful?	1	yes.
The following statement was made in French language: il est attardé??? @url. Is the given statement hateful?	0	no.
The following statement was made in French language: @user @user @user @user tellement facile et éculé ce terme de gauchiste asséné dès que… @url. Is the given statement hateful?	0	no.
The following statement was made in French language: loon plage : une femme violemment agréssée par un groupe de migrants @url. Is the given statement hateful?	0	no.
The following statement was made in French language: @user j’aimerais que l’on s’attarde sur ta tête qui est juste sublime. Is the given statement hateful?	0	no.
The following statement was made in French language: @user si t’es féministe tu défends chacun des droits de la femme même celui de rester à la maison s’occuper des… @url. Is the given statement hateful?	0	no.
The following statement was made in French language: @user @user @user m'a traitée de sale arabe. de sale blanche aussi.alors je sais pas où e… @url. Is the given statement hateful?	0	yes
The following statement was made in French language: les waves des renois phobie ça m’angoisse. Is the given statement hateful?	1	yes.
The following statement was made in French language: @user wallah frere y’a des renois ici si ils disent pas du mal des arabes ils dorment archi mal (hamdoulla… @url. Is the given statement hateful?	1	yes
The following statement was made in French language: @user @user @user Ça change quoi les chiffres hein ? trois mille migrants ou trois millions de migran… @url. Is the given statement hateful?	0	no.
The following statement was made in French language: le mec il est noir mais il dit quand même blackos allez mdr.. Is the given statement hateful?	0	no.
The following statement was made in French language: mais ils ont grv la grisaille les renois laaaa tema matuidi @url. Is the given statement hateful?	0	no.
The following statement was made in French language: @user je suis pas assez attardé sur son album j’irai réécouter. Is the given statement hateful?	0	no.
The following statement was made in French language: allemagne : les clans arabes font la loi. la police avait décidé de ne pas réagir pour éviter de se faire traiter d… @url. Is the given statement hateful?	1	yes
The following statement was made in French language: @user remplacez « éducation nationale » par « islam » « pedophilie » par « terrorisme » et « professeur » p… @url. Is the given statement hateful?	1	yes.
The following statement was made in French language: hier j'ai fini la saison 1 de punisher. je crois que je n'ai jamais vu autant de violence dans une série ou un… @url. Is the given statement hateful?	0	no.
The following statement was made in French language: @user la violence ne peut pas être la norme. la force nécessaire l'est quand les interventions la requièr… @url. Is the given statement hateful?	0	no.
The following statement was made in French language: @user bordel les attardé en force. Is the given statement hateful?	1	yes.
The following statement was made in French language: @user pendant 40 ans ânonné : l’immigration (africaine) une chance pour la france ! les résultats… @url. Is the given statement hateful?	1	no.
The following statement was made in French language: @user @user ben toi aussi te dira de te reconvertir quand pour raison x ou un groupe de d... @url. Is the given statement hateful?	0	no.
The following statement was made in French language: @user @user @user @user ah d’accord donc si t’es pas renoi ou rebeu tu ne peux pas donner… @url. Is the given statement hateful?	0	yes.
The following statement was made in French language: quand voit le carnage de maduro le gauchiste prefere de melenchon ude4c @url. Is the given statement hateful?	0	yes
The following statement was made in French language: @user c’est un attardé la vérité tu te souviens en 2015 quand se fait sortir contre la juve le nombre d’occa… @url. Is the given statement hateful?	1	yes
The following statement was made in French language: quand wauqiuez fait presque passer phillipe pour un gauchiste le droit d'être dépité ? #lemissionpolitique. Is the given statement hateful?	0	no
The following statement was made in French language: il faudra un jour s’interroger sur la violence que c’est pour les familles homoparentales de se voir jeter l’intérê… @url. Is the given statement hateful?	0	no.
The following statement was made in French language: top : @user 'bienvenue à #cergy où des migrants africains complètement nus agressent sauvagement les français… @url. Is the given statement hateful?	1	yes
The following statement was made in French language: marine le pen au pouvoir pour fermer les frontières expulser tous les clandestins les migrants retirer les papiers… @url. Is the given statement hateful?	0	no.
The following statement was made in French language: meurtre d’une adolescente: «les médias canadiens préfèrent protéger les réfugiés»: @url via @user. Is the given statement hateful?	0	no.
The following statement was made in French language: ahahah il croit dur comme fer l'avion de ligne qui fait des pirouettes quel giga mongol @url. Is the given statement hateful?	1	no.
The following statement was made in French language: @user @user je suis végétarienne et n'adhère pas à cette violence fait par le mouvement vegan chacun doit être libre respect svp. Is the given statement hateful?	0	no.
The following statement was made in French language: @user @user @user plein d'animaux seront en voie d...extinction donc dit merci qui merci mussoli et aux fermier. Is the given statement hateful?	0	yes.
The following statement was made in French language: les quotidiens arabes en arabe soudanais mardi 25 septembre 2018 @url. Is the given statement hateful?	0	no.
The following statement was made in French language: added video @user playlist @url l' opposition ne dispose d'aucun programme et s'attarde sur des faux. Is the given statement hateful?	0	no.
The following statement was made in French language: rt @user la logique d'un gauchiste #npc #npcmeme @url. Is the given statement hateful?	0	no.
The following statement was made in French language: @user @user et non il n’y pas plus de crimes commis par des migrants que des français blancs. seulement moins… @url. Is the given statement hateful?	0	no
The following statement was made in French language: @user @user @user merci de fr passer les arabes pr des haineux. Is the given statement hateful?	0	yes.
The following statement was made in French language: plus de 60 villes ont déjà dit oui pour venir en aide aux réfugiés. et l… @url. Is the given statement hateful?	0	no
The following statement was made in French language: l’ua “effarée” par les propos de salvini à propos des migrants africains en europe @url @url. Is the given statement hateful?	0	no.
The following statement was made in French language: @user oui et ne veut pas non plus des migrants islamo-africains !. Is the given statement hateful?	1	yes
The following statement was made in French language: pas de sexe pas de violence pas de religion pas de drogue apple va consacrer 1 milliard de dollars dans un rema… @url. Is the given statement hateful?	0	no
The following statement was made in French language: @user sale payday juif arabophile retourne en cuisine !. Is the given statement hateful?	1	yes.
The following statement was made in French language: lui c le genre de mec qui finit au tribunal pour violence conjugale @url. Is the given statement hateful?	0	yes
The following statement was made in French language: ce sont des migrants finlandais aveugle ! @url. Is the given statement hateful?	1	no.
The following statement was made in French language: @user @user euh je ne suis vraiment pas attardé sur ‘’ belle fille’’ hein je demande si tu dé… @url. Is the given statement hateful?	0	no.
The following statement was made in French language: @user @user @user je demande aussi. Is the given statement hateful?	0	no.
The following statement was made in French language: dakar : des militaires français impliqués dans une rixe @url @user @url. Is the given statement hateful?	0	no.
The following statement was made in French language: tripoli violence rises france wants sanctions militias | reuters @url. Is the given statement hateful?	0	no.
The following statement was made in French language: @user encore une attitude de bobo gauchiste ... Is the given statement hateful?	1	no.
The following statement was made in French language: @user @user je reste sceptique sur les solutions très tranchées lorsqu’on ne s’attarde pas complèt… @url. Is the given statement hateful?	0	no.
The following statement was made in French language: @user @user @user @user @user comment débattre entre gauchiste sans aucune contradiction. Is the given statement hateful?	0	no.
The following statement was made in French language: @user la violence mdrr va falloir que tu censure tes tweets. Is the given statement hateful?	0	no.
The following statement was made in French language: @user @user la france l’europe une bonne partie du monde arabe et du monde tout court considère le h… @url. Is the given statement hateful?	0	no.
The following statement was made in French language: il faut refuser d'accueillir l'aquarius qui transporte sûrement de faux migrant… @url. Is the given statement hateful?	1	no.
The following statement was made in French language: les #migrants traversent la mer et trouvent les aides sociales. Is the given statement hateful?	0	no.
The following statement was made in French language: pour ça heureusement j’ai mon côté italien qui sauve les rebeus entre nous c trop grave @url. Is the given statement hateful?	1	yes.
The following statement was made in French language: grande-bretagne : la prière musulmane est récitée (en arabe) avant l’ouverture de la session du conseil municipal d… @url. Is the given statement hateful?	1	no.
The following statement was made in French language: @user le sucré salé c’est degueu. Is the given statement hateful?	0	no.
The following statement was made in French language: allez nique ta mère sale juif @url. Is the given statement hateful?	1	yes
The following statement was made in French language: : [@user @user le rapeur en cause qui le fils d'un migrant exactement les même droits il même bén… @url. Is the given statement hateful?	0	no.
The following statement was made in French language: @user sjw et féministe twitter un sale combo. Is the given statement hateful?	0	no.
The following statement was made in French language: @user c’est de la violence dont vous êtes le produit?. Is the given statement hateful?	0	no.
The following statement was made in French language: le « sale juif » mis en avant contrairement aux autres mdr #lejouroujaibrulemoncoeur. Is the given statement hateful?	1	yes.
The following statement was made in French language: @user dis toi j'essaie de faire un meme de moi même je suis un attardé. Is the given statement hateful?	1	yes.
The following statement was made in French language: @user @user @user tu te rends compte? des soldats en couche qui giflent tous les pays arabes voisins. respect !. Is the given statement hateful?	1	yes.
The following statement was made in French language: les renois et leurs flow c'est tellement une douceur pour les yeux :)). Is the given statement hateful?	0	no.
The following statement was made in French language: cousine c’est une blanche et elle sort qu’avec des rebeus/renois + elle change de mecs tous les mois je la compr… @url. Is the given statement hateful?	0	yes.
The following statement was made in French language: @user app de mongol. Is the given statement hateful?	1	yes.
The following statement was made in French language: @user @user l’antisémitisme de nos jours vient de l’extrême-gauche et de l’islam.. Is the given statement hateful?	1	no.
The following statement was made in French language: #lfauit @user doit voir le #mongol. Is the given statement hateful?	1	no.
The following statement was made in French language: @user @user l'empire mongol. Is the given statement hateful?	0	no.
The following statement was made in French language: dc en fait au ils n'ont tjrs légalisé l'avortement ça reste un sujet tabou. par contre ça fait 4ans qu'on appren… @url. Is the given statement hateful?	0	no
The following statement was made in French language: @user tous ces gens qui refusent de céder au terrorisme intellectuel ça doit en effrayer plus d'un.. Is the given statement hateful?	0	no.
The following statement was made in French language: le nouvel eldorado des rebeus c plus le trading mtn c'est l'aéroport. Is the given statement hateful?	1	no.
The following statement was made in French language: @user @user l’islam valide le terrorisme et ne s’y oppose pas ce que fait daesh n’est absolument pas e… @url. Is the given statement hateful?	1	yes.
The following statement was made in French language: l'invasion que nous subissons celle des touristes cet homme est historien gauchiste @url. Is the given statement hateful?	0	no.
The following statement was made in French language: lmao yaura moins de rebeus que sur certaines lignes actuelles de la ratp @url. Is the given statement hateful?	1	yes.
The following statement was made in French language: tous les jours negro c’est fridayyy. Is the given statement hateful?	1	no.
The following statement was made in French language: manœuvre gauchiste habituelle : @user essaye de détourner l'attention portée sur #nickconrad en utilisant… @url. Is the given statement hateful?	1	no.
The following statement was made in French language: il n'y pas d'islamisation de la france.. Is the given statement hateful?	1	no.
The following statement was made in French language: @user @user j’aimerais bien savoir pourquoi « l’islamogauchiste » est votre ennemi principal et… @url. Is the given statement hateful?	0	no.
The following statement was made in French language: @user @user il fait quoi au juste ce gouvernement? pourquoi il s'attarde sur des futilités alors qu'il de… @url. Is the given statement hateful?	0	no
The following statement was made in French language: @user @user @user Être musulman ne veut pas dire favoriser le terrorisme comme etre catho ne ve… @url. Is the given statement hateful?	0	no
The following statement was made in French language: petit moment romantique sur une balançoire au bord de la mer @url. Is the given statement hateful?	0	no.
The following statement was made in French language: quel ramassis d’attardé @url. Is the given statement hateful?	0	yes.
The following statement was made in French language: c’est bien une gauchiste. Is the given statement hateful?	1	no.
The following statement was made in French language: @user @user t'aime bien le gout de la viande un carnivore c'est tout.. Is the given statement hateful?	0	no.
The following statement was made in French language: putain mais quel mongol @url. Is the given statement hateful?	1	yes.
The following statement was made in French language: @user faut arreter mlp c'est qu'une gauchiste !. Is the given statement hateful?	0	no.
The following statement was made in French language: @user accueillir 58 migrants c'est sans fin ça appellera la venue d'autres migrants et vous le savez très… @url. Is the given statement hateful?	0	no
The following statement was made in French language: puis le film s’appelle « bohemian rhapsody » mais le film s’attarde très peu sur la conception de ce chef d’œuvre musical. Is the given statement hateful?	0	no.
The following statement was made in French language: t’piétine ta mère pour un « sale noir sale arabe ». Is the given statement hateful?	1	yes.
The following statement was made in French language: @user @user @user non je préfère juste que tu arrêtes d'employer ton vocabulaire de gauchiste (c… @url. Is the given statement hateful?	0	yes
The following statement was made in French language: @user les rebeus tu baises leurs frangines ils sont déboussolés. Is the given statement hateful?	1	yes.
The following statement was made in French language: rt @user le parti de melenchon condamne la visite de 185 patrons francais en isralnla section rennaise du parti islamo-gauchiste l. Is the given statement hateful?	1	no.
The following statement was made in French language: @user j’avais vu ça dans une de tes vidéos déjà mais j’m’y était pas attardé c’est futbin de pes en fait mais en mieux :p. Is the given statement hateful?	0	no.
The following statement was made in French language: les rebeus avec des pp messi et death note ça parle de vous les puces @url. Is the given statement hateful?	1	yes.
The following statement was made in French language: @user @user renz gangsta le plus beau de tt les rebeus. Is the given statement hateful?	0	no.
The following statement was made in French language: @user @user oh mon dieu non pas le bloquage supreme @url. Is the given statement hateful?	0	no.
The following statement was made in French language: #migrants #islam #islamisation #islamisme #islam #afrique #immigrants #macron #lrem #fra…. Is the given statement hateful?	0	no.
The following statement was made in French language: @user @user envie de pleurer (vraiment)ntu refait soiree nlove. Is the given statement hateful?	0	no.
The following statement was made in French language: @user tu es sale comme juif.... Is the given statement hateful?	1	yes
The following statement was made in French language: il est comment lui — plus beau que tout les rebeus @url. Is the given statement hateful?	1	yes.
The following statement was made in French language: @user @user @user n'oublions pas que beaucoup de juifs se sont réfugiés au maghreb à cette… @url. Is the given statement hateful?	0	no.
The following statement was made in French language: zizou ce sale arabe je le déteste c’est pas possible il se prends pour un influencer ou je ne sais quoi espèce de s… @url. Is the given statement hateful?	1	yes.
The following statement was made in French language: les renois ils ont des gènes de titans wsh ils poussent 3 jours ils sont stock. Is the given statement hateful?	1	yes
The following statement was made in French language: je suis gauchiste jusque dans la masturbation. Is the given statement hateful?	0	no.
The following statement was made in French language: @user c'est qui cet attardé. Is the given statement hateful?	1	yes.
The following statement was made in French language: @user @user @user @user oui je suis maman. et pas de violences chez moi. en aucun cas. la violenc… @url. Is the given statement hateful?	0	no.
The following statement was made in French language: @user @user les rothschild sont dans la grande finance et rothschild = juif dans l’inconscient collecti… @url. Is the given statement hateful?	0	yes.
The following statement was made in French language: les tutos en français sur youtube c’est insupportable les 3/4 des vidéos c’est des mecs ils te parlent comme si t’étais un attardé. Is the given statement hateful?	0	no.
The following statement was made in French language: malheureusement en #france un de perdu dix de retrouvés ! #migrants #stopimmigration @url. Is the given statement hateful?	1	no.
The following statement was made in French language: @user @user @user ah ben si tu les méprise ça se voit sinon tu te battrais pas contre l’avortement.. Is the given statement hateful?	0	no.
The following statement was made in French language: [série d'agressions avec violence : des faits de trop mais peu nombreux en corse] (@url via… @url. Is the given statement hateful?	1	no.
The following statement was made in French language: bon apres jsuis content que jai fais ca mtn jle referai plus mais ptdrrrr jsuis quel genre de mongol. Is the given statement hateful?	0	no.
The following statement was made in French language: @user jpense il s’y est pas attardé bc ça aurait pas intéressé grand monde (jcoco très peu de gens qui se pose… @url. Is the given statement hateful?	0	no.
The following statement was made in French language: invité afrique - algérie: «les migrants sont beaucoup plus vulnérables maintenant» pour leïla berrato @url. Is the given statement hateful?	1	no.
The following statement was made in French language: @user et ds les campagnes ..ou macron met 72 migrants dans un village de 400 personnes...et ou vont aller l… @url. Is the given statement hateful?	1	no
The following statement was made in French language: c'est peut-être un attardé mental ce type mais ce qu'il dit c'est à 200% vrai @url. Is the given statement hateful?	0	no
The following statement was made in French language: @user non des sale noirs et des sale arabe. Is the given statement hateful?	1	yes.
The following statement was made in French language: #duisburg 4 réfugiés arabes lardent de coups de couteau une ado allemande enceinte de 5 mois qui cru qu’elle p… @url. Is the given statement hateful?	1	yes
The following statement was made in French language: dégoût dégoût dégoût. mais il faut accueillir les migrants africains alors qu' ils ont des richesses et pourrai… @url. Is the given statement hateful?	1	no
The following statement was made in French language: : [@user @user @user quand vous accusez bts d’harcèlement s*xuellec pas grave mais quand ramène l… @url. Is the given statement hateful?	0	yes.
The following statement was made in French language: naza mongol te po na banda ko seka seka kk boyer s…. Is the given statement hateful?	0	yes.
The following statement was made in French language: @user c'est propre à la gauche ce terrorisme intellectuel l'histoire l'a démontré et le montre encore.. Is the given statement hateful?	1	no.
The following statement was made in French language: @user tous mes profs utilisent le bon prénom et j'ai même changé de prénom au secrétariat de la fac. Is the given statement hateful?	0	no.
The following statement was made in French language: l'europe n'est pas un menu à la carte lance macron aux pays qui refusent d'accueillir des migrants @url. Is the given statement hateful?	1	no.
The following statement was made in French language: c'est bete de rt trop vite des informations provenant de la conosphere islamo-gauchiste.nnc'est revoltant de se rej @url. Is the given statement hateful?	0	no.
The following statement was made in French language: ce qui tue c'est que meme offset il en marre de cardi b wallah apars sa reuss personne peut la supporte cette grosse mongol. Is the given statement hateful?	1	yes.
The following statement was made in French language: y'a plus de renois sur le terrain que dans tous les pays d'afrique subsaharienne réunis #olom. Is the given statement hateful?	0	yes.
The following statement was made in French language: @user @user comme vous n'êtes pas juif vous êtes con et sale.. Is the given statement hateful?	1	yes.
The following statement was made in French language: quand j'étais au collège et que j'étais vraiment vraiment mal à cause du harcèlement que je subissais je confia… @url. Is the given statement hateful?	0	no
The following statement was made in French language: sous la direction de genghis khan l’immense empire mongol utilisé un système postal avancé à travers l’empire. #uoim2. Is the given statement hateful?	0	no.
The following statement was made in French language: et grave que mes potes rebeus et blacks se faisaient régulièrement contrôler jusqu’à leurs… @url. Is the given statement hateful?	0	no
The following statement was made in French language: @user @user ps mais el acquiaissais tout ce qu'el disait el disait à la russe laisser tomber faut ps par… @url. Is the given statement hateful?	0	no.
The following statement was made in French language: @user ta apporté quoi toi part ta sale geule d’arabe et ta grand mère. Is the given statement hateful?	1	yes.
The following statement was made in French language: @url @url @url tu dit de la merde putain de gauchiste @url. Is the given statement hateful?	0	yes.
The following statement was made in French language: jsuis vrmt attardé miam. Is the given statement hateful?	0	no.
The following statement was made in French language: @user je suis pas attardé dans la gare mais dehors ca appelle de partout en effet.. Is the given statement hateful?	0	no.
The following statement was made in French language: rt @user le hashtag #pasdevague sonne enfin le glas de l'ideologie laxiste gauchiste qui predomine depuis des annees au sein de. Is the given statement hateful?	1	no.
The following statement was made in French language: chez les arabes c meme pas la peine de poser la question @url. Is the given statement hateful?	1	no.
The following statement was made in French language: @user y'a des renois mais pas tout les renois c'est différent pas tous la même mentalité et puis jvois pas il est ou le pb. Is the given statement hateful?	0	no.
The following statement was made in French language: @user @user @user @user @user @user deformation bobo gauchiste... pa... @url. Is the given statement hateful?	0	yes.
The following statement was made in French language: @user @user fréquemment des arabes reconaissent que la france est belle et serait mieux sans les français !. Is the given statement hateful?	1	yes
The following statement was made in French language: rt @user fort interessant que ce soit gauchiste que de faire payer les pollueurs pour la pollution que leurs industries produisent. Is the given statement hateful?	0	no.
The following statement was made in French language: @user c clair. ils veulent être rebeus ou renois pour réussir à pécho des meufs mais pour le reste ils s… @url. Is the given statement hateful?	1	yes
The following statement was made in French language: « pour réduire les coûts d'une immigration exagérée pour expulser plus rapidement les délinquants et les faux dema… @url. Is the given statement hateful?	1	no.
The following statement was made in French language: les rebeus que je ne connais ni d’Ève ni d’adam (oui expression de vieille) arrêtez de rajouter sur fb ça n’arr… @url. Is the given statement hateful?	1	no.
The following statement was made in French language: @user @user tant d'imbéciles ne réalisent pas à quel point l'invasion arabo-musulmane de l'europe peut être dangereuse.. Is the given statement hateful?	1	yes.
The following statement was made in French language: pensez-vous que les rebeus et renois s’aiment réellement ?. Is the given statement hateful?	0	no.
The following statement was made in French language: wesh le cameraman il cssse les couilles filmé le gros porc de rebeus hagrid qui remplace simeone #asmatl. Is the given statement hateful?	1	yes.
The following statement was made in French language: @user @user @user et vous vous êtes contres la pma pour tout le monde et contre l’avortement. el… @url. Is the given statement hateful?	0	no.
The following statement was made in French language: @user @user @user rien voir avec l'extreme droitefaut arreter la fumette gauchistetout le mond... @url. Is the given statement hateful?	0	no.
The following statement was made in French language: @user @user une insulte appelle cela une insulte. dans sale blanc sale arabe sale noir… @url. Is the given statement hateful?	0	yes.
The following statement was made in French language: les renois qui font les gars de la cité et qui courent comme mbappé dés que un chien vous connait #cesoirtribunal. Is the given statement hateful?	1	no.
The following statement was made in French language: prise en charge des réfugiés fuyant la guerre. @url. Is the given statement hateful?	0	no.
The following statement was made in French language: @user contre l’avortement c’est pire que contre la transexualité je trouve. Is the given statement hateful?	1	no.
The following statement was made in French language: @user mais meme rebeus oran je chiale meuf. Is the given statement hateful?	0	no.
The following statement was made in French language: quel est le mongol qui fait cela? pas de signature... @url. Is the given statement hateful?	1	no.
The following statement was made in French language: qu'en pensent les obscurantistes pro-agrochimie pro-développement à outrance anti-écolos et autres climato-scepti… @url. Is the given statement hateful?	1	no.
The following statement was made in French language: @user @user @user elle permis en effet la reconnaissance du droit à l'#avortement le droit à l'… @url. Is the given statement hateful?	0	no.
The following statement was made in French language: ah oui et la presse française va continuer d'expliquer qu'un arabe criant allahu akbar en tuant un mécréant n'est… @url. Is the given statement hateful?	1	yes
The following statement was made in French language: france :jeudi prochain à la librairie résistances : « les naufragés. l’odyssée des migrants africains etienne du… @url. Is the given statement hateful?	0	no.
The following statement was made in French language: @user bah s'ils disent qu'ils ne sont pas français ce sont donc des migrants ? il faut donc les expulser !. Is the given statement hateful?	1	yes.
The following statement was made in French language: @user @user @user et dites aussi vive le front national pendant que vous etes ! c'est une... @url. Is the given statement hateful?	0	yes.
The following statement was made in French language: nouveau virage à gauche du ps revenu dans l'opposition. après le mandat hollande… faire de l'accueil des migrants… @url. Is the given statement hateful?	0	no
The following statement was made in French language: @user je vous le demande faites en sortes de bloquer l'argent volé aux africains qui est caché dans vos b… @url. Is the given statement hateful?	0	no.
The following statement was made in French language: @user cette technique est reservée que aux parents rebeus. Is the given statement hateful?	0	yes.
The following statement was made in French language: @user @user @user peut aussi dire qu'on est totalement menacé de submersion invasion is… @url. Is the given statement hateful?	0	no.
The following statement was made in French language: gâteaux rebeus : étape 1 @url. Is the given statement hateful?	1	no.
The following statement was made in French language: @user tu nous ramène une maladie de jérusalem?]. Is the given statement hateful?	1	no.
The following statement was made in French language: @user ohhh la violence je meuuurs. Is the given statement hateful?	0	no.
