# Supplementary material
Source: ML conference proceedings conference paper supplement (https://aclanthology.org/2024.emnlp-main.886)
Supplement: software [file PG_2.xlsx]

## Sheet: Sheet1
text	label	gpt
The following statement is in German langauge and a native german speaker annotated this as hateful: Sowas von lächerlich. Scheiß @polizei_nrw_bo. Is the given statement hateful?	1	yes.
The following statement is in German langauge and a native german speaker annotated this as hateful: @DanyVause Deutsche Kultur https://t.co/nUdQfuCLsc. Is the given statement hateful?	0	yes
The following statement is in German langauge and a native german speaker annotated this as hateful: @RasmusAndresen Noch mehr Migranten auf dem Weg das deutsche Volk zu zerstören..... Is the given statement hateful?	1	yes
The following statement is in German langauge and a native german speaker annotated this as hateful: @Cloud_Plays Aber nur deutsche Kartoffeln!. Is the given statement hateful?	0	yes
The following statement is in German langauge and a native german speaker annotated this as hateful: @Nichttweeterin Keine Ahnung. Stimmt, ist was Italienisches.. Is the given statement hateful?	0	no
The following statement is in German langauge and a native german speaker annotated this as hateful: RT @realJohr: ........moralischer Landesverrat ist bei der #Afd eine Auszeichnung! Rückgratlos aber egal - scheiß auf das dumme Wahlvieh...…. Is the given statement hateful?	1	yes
The following statement is in German langauge and a native german speaker annotated this as hateful: RT @PhilHackemann: Wie kann einem #Europa eigentlich so am Arsch vorbeigehen, dass man bei solch einer Schicksalswahl seine Stimme an „Die…. Is the given statement hateful?	1	yes
The following statement is in German langauge and a native german speaker annotated this as hateful: @neothemarius @niemehrgruen Nicht zu vergessen, einen moderaten ISlam.... Is the given statement hateful?	0	yes.
The following statement is in German langauge and a native german speaker annotated this as hateful: RT @janni2872: Auch Männer brauchen ab und an einen sinnbildlichen Tritt in den Arsch und nachher einen beherzten Griff an selbigen.. Is the given statement hateful?	0	yes.
The following statement is in German langauge and a native german speaker annotated this as hateful: Linke Aktivisten - die geduldeten Verbrecher https://t.co/Cpq8VT9qR9. Is the given statement hateful?	1	yes
The following statement is in German langauge and a native german speaker annotated this as hateful: RT @ralph_bremer: Ich wähle #PIRATEN Die sind ehrlich und Grün und Freiheitlich ! Oder nehmt die Linken, die werden nicht schwarz Mit de…. Is the given statement hateful?	0	no
The following statement is in German langauge and a native german speaker annotated this as hateful: @airliners_de Hat Airbus doch schon, der Typ ist überhaupt nicht informiert: https://t.co/eND8FAXIpE @Der_Postillon. Is the given statement hateful?	0	no
The following statement is in German langauge and a native german speaker annotated this as hateful: RT @pinkcrazypony: Und hier das Orginal. Ahmad , 2 Frauen ,6 Kinder leben in einem Haus 5 Zimmer , 2 Bäder und eine Küche. Bezahlt vom Job…. Is the given statement hateful?	1	yes.
The following statement is in German langauge and a native german speaker annotated this as hateful: Und diese fucking nagelneuen weißen, glänzenden Kacheln. Dagegen sehen die scheiß lackierten gelblich aus. Ich wüns… https://t.co/MIwueRZZ2u. Is the given statement hateful?	0	yes
The following statement is in German langauge and a native german speaker annotated this as hateful: Hört bitte auf mir das Video in die Zeitlinie zu spülen in dem Felix von primitiven Moslems gesteinigt wird. Is the given statement hateful?	1	yes
The following statement is in German langauge and a native german speaker annotated this as hateful: @luaks030 Alle bis auf die Grünen 🤓 🍌. Is the given statement hateful?	1	yes.
The following statement is in German langauge and a native german speaker annotated this as hateful: #Die scheiß Amis können nicht ohne Krieg auf dieser Welt, die weißhelme Zetteln den Dreck an und Amis spielen wiede… https://t.co/d9gPOjVghN. Is the given statement hateful?	1	yes.
The following statement is in German langauge and a native german speaker annotated this as hateful: RT @CrazyIvan1979: @lawyerberlin Er lebt weiter in Merkel. https://t.co/Gh9Qo0R5H6. Is the given statement hateful?	0	yes.
The following statement is in German langauge and a native german speaker annotated this as hateful: @xmerve021 ja ist halt echt. Is the given statement hateful?	0	no
The following statement is in German langauge and a native german speaker annotated this as hateful: RT @DFakeNews1: Würde Deutschland nicht von Idioten bewohnt, würde es nicht von Idioten regiert.. Is the given statement hateful?	1	yes
The following statement is in German langauge and a native german speaker annotated this as hateful: Der Hashtag #NiewiederCDU impliziert, dass ihr schon mal das verlogene Dreckspack gewählt habt. Echt jetzt?!. Is the given statement hateful?	1	yes
The following statement is in German langauge and a native german speaker annotated this as hateful: So kann man seine linke Verblödung auch erklären.. Is the given statement hateful?	1	yes.
The following statement is in German langauge and a native german speaker annotated this as hateful: RT @froschdomse: "Lass das liegen Mia-Marie! Das ist Müll!" "Das ist Müll und da ist ein Mülleimer!" sprach die kleine Mia-Marie vor dem K…. Is the given statement hateful?	0	yes
The following statement is in German langauge and a native german speaker annotated this as hateful: Merkel und ihre Günstlinge, die diese Verbrecher zu Hauf zu uns einladen, müssen für jedes dieser Opfer zur Rechens… https://t.co/h4RRsh3EDj. Is the given statement hateful?	1	yes
The following statement is in German langauge and a native german speaker annotated this as hateful: RT @welt: Auftritt in Harvard: Merkel ist vollendet, sie ist reif https://t.co/zq0KVrizfa https://t.co/mhQhW0nUzi. Is the given statement hateful?	0	no
The following statement is in German langauge and a native german speaker annotated this as hateful: RT @LIZ_de: Nazis raus im Rathaus #Leipzig #srwle19 https://t.co/4BuFay4i53. Is the given statement hateful?	1	yes.
The following statement is in German langauge and a native german speaker annotated this as hateful: Das ist der größte Fehler dieser ganzen Idioten. Jeden, der (noch) dümmer ist als sie, dennoch/"erst recht" maximal… https://t.co/l8GpjHfi4f. Is the given statement hateful?	1	yes.
The following statement is in German langauge and a native german speaker annotated this as hateful: RT @krippmarie: Nach dem mit übelsten Methoden herbeigeführten Staatsstreich in Österreich lassen es sich die deutschen Linken nicht nehmen…. Is the given statement hateful?	0	yes
The following statement is in German langauge and a native german speaker annotated this as hateful: RT @DetlefStoldt: AfD-Chef Gauland: „Die Grünen werden dieses Land zerstören“ https://t.co/FtSberrDvB via @welt. Is the given statement hateful?	0	yes
The following statement is in German langauge and a native german speaker annotated this as hateful: kafeel ---&gt; kafeer ---&gt; kafir. Is the given statement hateful?	0	yes.
The following statement is in German langauge and a native german speaker annotated this as hateful: RT @rivotrilmitstil: manche maenner einfach andere liga an dumm siehe: https://t.co/WRvmvMCxGF. Is the given statement hateful?	1	yes
The following statement is in German langauge and a native german speaker annotated this as hateful: @jawl @miriam_vollmer @8xTeilzeit @_Daudi_ @LittleBinF Bzw. meist die Mutter, die erst ab Grundschulalter wieder ar… https://t.co/Nb1u1TDhHv. Is the given statement hateful?	0	yes.
The following statement is in German langauge and a native german speaker annotated this as hateful: @tagesschau Scheiß auf die EU! 🖕. Is the given statement hateful?	1	yes.
The following statement is in German langauge and a native german speaker annotated this as hateful: RT @LustigRalf: @Johannahh2 Als wir mit 28 das Haus in absoluter Alleinlage kauften sagten Freunde: Buh, voll am Arsch der Welt, wie langwe…. Is the given statement hateful?	0	no
The following statement is in German langauge and a native german speaker annotated this as hateful: @steak_staub6760 Hört sich nach aua an. Is the given statement hateful?	0	no
The following statement is in German langauge and a native german speaker annotated this as hateful: @bundeswehrInfo Zum Glück bin ich da schon lange raus und muss diesen Schwachsinn nicht mehr ertragen. Es gab mal e… https://t.co/PbWylaG8V9. Is the given statement hateful?	0	no
The following statement is in German langauge and a native german speaker annotated this as hateful: RT @gottessohn13: Scheisse bleibt Scheisse und Nazis bleiben Nazis. Wer das Dreckspack wählt, wählt wieder Fackel Umzüge und Krieg und ha…. Is the given statement hateful?	1	yes.
The following statement is in German langauge and a native german speaker annotated this as hateful: RT @monoblock_: Deutsche Nachtkönig https://t.co/vn5aaLKBMl. Is the given statement hateful?	0	yes
The following statement is in German langauge and a native german speaker annotated this as hateful: RT @EngelGert: @Musclebear66 @mariomayl @utawie Wäre ich #Trump, würde ich #Merkel nicht wieder herauslassen. 😂😂😂 https://t.co/ZsstLjla1D. Is the given statement hateful?	0	no
The following statement is in German langauge and a native german speaker annotated this as hateful: @lou_lorenz @SonjaAblinger so eine MännerWG ist halt schon lässig... ;-). Is the given statement hateful?	0	no
The following statement is in German langauge and a native german speaker annotated this as hateful: RT @burger_ein: Radikale Moslems und nationalistische Türken Die verschwiegenenen Wähler der Grünen https://t.co/u7Jj38Ldc1. Is the given statement hateful?	1	yes.
The following statement is in German langauge and a native german speaker annotated this as hateful: @VetovsVictory Löblich. Ich kann mir aber nicht noch mehr Scheiße in den Kopf packen.. Is the given statement hateful?	0	yes
The following statement is in German langauge and a native german speaker annotated this as hateful: @PGDeutschland @FCBayern drecksbayern pack!. Is the given statement hateful?	1	yes
The following statement is in German langauge and a native german speaker annotated this as hateful: @welt_empfaenger @Weltspiegel_ARD @tagesschau Du Rassist.. Is the given statement hateful?	0	yes.
The following statement is in German langauge and a native german speaker annotated this as hateful: RT @artistangelico: Archangel Gabriel Annunciate, 1433 #earlyrenaissance #italianart https://t.co/XdgdkfLT6B. Is the given statement hateful?	0	no.
The following statement is in German langauge and a native german speaker annotated this as hateful: @vWSTD @KordiMVP @Neeyrox Wer will wenn linken überhaupt hahahaha. Is the given statement hateful?	0	no
The following statement is in German langauge and a native german speaker annotated this as hateful: RT @Imageberatungen: Im Grunde genommen sind heute linke und grüne Parteien absolut überflüssig - sie wollen reglementarisch überall eingre…. Is the given statement hateful?	0	yes.
The following statement is in German langauge and a native german speaker annotated this as hateful: @AchimSpiegel Niemand vergißt was. Es gibt vermutlich kein anderes Volk der Welt, das die Verbrechen seiner Vorfahr… https://t.co/t0eAwrayJm. Is the given statement hateful?	0	yes.
The following statement is in German langauge and a native german speaker annotated this as hateful: Ein Genderklo für schwule Islamisten und deren lesbischen Frauen.. Is the given statement hateful?	1	yes.
The following statement is in German langauge and a native german speaker annotated this as hateful: Lügen gegen rääächds 😱 Statistik gegen rääächds 😱 ... Alles gegen rääächds, wenn hüpfen nicht mehr reicht 😝. Is the given statement hateful?	0	yes
The following statement is in German langauge and a native german speaker annotated this as hateful: @welt Wir brauchen ehrliche Politiker die für Klarheit Wahrheit und Transparenz stehen .Wir brauchen Bürger die nic… https://t.co/unuxnLbHVB. Is the given statement hateful?	0	no
The following statement is in German langauge and a native german speaker annotated this as hateful: Zurück ins Jugendzimmer https://t.co/PRUP8CoQDH. Is the given statement hateful?	0	no.
The following statement is in German langauge and a native german speaker annotated this as hateful: RT @PeterZobel4: @ZDFheute "Keine Zusammenarbeit mit rechten Parteien". Also gehört Merkel einer linken Partei an? Oder was soll das heißen?. Is the given statement hateful?	0	no
The following statement is in German langauge and a native german speaker annotated this as hateful: RT @wokeup777: “Der Islam ist eine Sekte, die im Widerspruch zur angolanischen Kultur steht.“ Ich möchte hinzufügen, nicht nur zur angolani…. Is the given statement hateful?	1	yes
The following statement is in German langauge and a native german speaker annotated this as hateful: RT @zuckerbienchen_: Bin kurz vor den 2.222 Followern! Ein paar von euch können sich jetzt schon mal ausziehen und mir dann ihre Nudes sch…. Is the given statement hateful?	0	yes
The following statement is in German langauge and a native german speaker annotated this as hateful: RT @reisewut: @tiefenunscharf Ich puste mal zurück 😬 https://t.co/XT6546moPv. Is the given statement hateful?	0	no
The following statement is in German langauge and a native german speaker annotated this as hateful: @SteinbachErika @Grandel1 Junge , Junge , ich wusste nicht das es so viele Links/ Grüne Idioten gibt .. Is the given statement hateful?	0	yes.
The following statement is in German langauge and a native german speaker annotated this as hateful: @GermanLetsPlay Bei mir ist die Download rate mehr als nur im arsch bei Unitymedia 5minuten für vielleicht 20m/bit… https://t.co/nGB5lqlPVW. Is the given statement hateful?	0	no
The following statement is in German langauge and a native german speaker annotated this as hateful: RT @annakatrein: #Merkel wie sie hätte sein können: eine Weltpolikerin, die aus ihrer Biographie eine mutige, progressive Agenda ableitet #…. Is the given statement hateful?	0	no
The following statement is in German langauge and a native german speaker annotated this as hateful: Gedson Fernandes &gt; Gelson Fernandes. https://t.co/ozc4YmVc9Y. Is the given statement hateful?	0	no
The following statement is in German langauge and a native german speaker annotated this as hateful: @SapereAudeDE @mariomayl So ein asoziales Pack... raus aus Deutschland. Is the given statement hateful?	1	yes.
The following statement is in German langauge and a native german speaker annotated this as hateful: RT @Vancullo: Jetzt mal sehen ob die Grünen wieder vermehrt "Bienen" zum leben erwecken, oder ob die auserwählt wurden,um der neuen künstli…. Is the given statement hateful?	0	yes
The following statement is in German langauge and a native german speaker annotated this as hateful: @welt Merkel Deutschland eben......die Frau auch doch total versagt. Is the given statement hateful?	0	yes
The following statement is in German langauge and a native german speaker annotated this as hateful: Menno! Ich bin erkältet! Wo ist denn der scheiß Klimawandel, wenn man ihn mal braucht?! Scheiß Grüne! 😤😭🤒😷🤧. Is the given statement hateful?	1	yes
The following statement is in German langauge and a native german speaker annotated this as hateful: RT @HolDuDieLadio: Sie soll es der Merkel und GroKo sagen..... da sitzen die Lobbyisten der Autobauer, die das ganze System manipulieren...…. Is the given statement hateful?	0	yes
The following statement is in German langauge and a native german speaker annotated this as hateful: @enmachuk Deutsche leute... 🤦🏼‍♀️. Is the given statement hateful?	0	yes.
The following statement is in German langauge and a native german speaker annotated this as hateful: @ThegreatHubini @IlIIlIIIIlI @GeraldGrosz Das hättet Ihr Linken Spinner wohl am liebsten, nix dergleichen wird pass… https://t.co/C67SQAMaKN. Is the given statement hateful?	1	yes.
The following statement is in German langauge and a native german speaker annotated this as hateful: Nur für Klopp! lfc ist noch scheisse!. Is the given statement hateful?	0	yes
The following statement is in German langauge and a native german speaker annotated this as hateful: Erst #Merkel, dann Amri, jetzt Habeck. Alle wurden/werden falsch eingeschätzt. Immer mit fatalen Folgen. https://t.co/gJfeak98DA. Is the given statement hateful?	0	yes
The following statement is in German langauge and a native german speaker annotated this as hateful: "Ach scheiß FridaysforFuture! Die sollen erstmal lernen gehen! Alles ungebildete Schulschwänzer da. Alle dumm" ... *schnauft genervt*. Is the given statement hateful?	1	yes
The following statement is in German langauge and a native german speaker annotated this as hateful: Alle Kinder werden unsere neue Rucksäcke lieben! Süße Pandas und Lamas mit abstehenden Ohren, „beißender“ Hai oder… https://t.co/NddIsAAtcg. Is the given statement hateful?	0	no
The following statement is in German langauge and a native german speaker annotated this as hateful: @helllud123 @tagesschau Schwachsinn 🤕. Is the given statement hateful?	0	yes.
The following statement is in German langauge and a native german speaker annotated this as hateful: RT @Pablaer: Merkels Vollstrecker - Die Antifa. Is the given statement hateful?	0	yes.
The following statement is in German langauge and a native german speaker annotated this as hateful: Hahah ich kann jz zum Wahlbüro laufen weil ich zu meinem Vater gesagt hab dass er dumm ist. Is the given statement hateful?	0	no
The following statement is in German langauge and a native german speaker annotated this as hateful: Extension: Daniel Mitchell (F) | Telford Tigers -&gt; Telford Tigers | https://t.co/nkx2RGNWVN #NIHL. Is the given statement hateful?	0	no
The following statement is in German langauge and a native german speaker annotated this as hateful: @reitschuster Sind halt empfindliche Idioten, die schon Widerspruch zur eigenen Meinung als so schlimm empfinden, d… https://t.co/ddtiPqm2PE. Is the given statement hateful?	0	yes.
The following statement is in German langauge and a native german speaker annotated this as hateful: @Ralf_Stegner Nach euren unzähligen Lügen glaubt euch diesbezüglich eh kein Mensch. Hört auf uns den nächsten Krieg… https://t.co/wKdTxNluiP. Is the given statement hateful?	0	yes.
The following statement is in German langauge and a native german speaker annotated this as hateful: @maybach_ron @DDuric So werden bald alle Frauen behandelt Nücht mit Gleichberechtigung und so ein Müll das gehört ab sofort zu Deutschland.. Is the given statement hateful?	0	yes.
The following statement is in German langauge and a native german speaker annotated this as hateful: RT @Scyltara: Erst wenn die letzte Kirche verwüstet, die letzte Frau ein Kopftuch trägt und die letzten Ungläubigen vernichtet Erst wenn d…. Is the given statement hateful?	1	yes.
The following statement is in German langauge and a native german speaker annotated this as hateful: Scheiß bayern aller. Is the given statement hateful?	1	yes.
The following statement is in German langauge and a native german speaker annotated this as hateful: @FairDest @Cloafleev1606 @BlizzardCSEU_DE @Warcraft_DE Naja, wenn wir schon so anfangen ist das Wort "Hurensohn" auch fehl am Platz.. Is the given statement hateful?	0	yes.
The following statement is in German langauge and a native german speaker annotated this as hateful: RT @TradeMonkeys: Movement chart $TTCM —&gt; $IBGR —&gt; $KRFG 💥💥💥💥💥💥💥. Is the given statement hateful?	0	no.
The following statement is in German langauge and a native german speaker annotated this as hateful: RT @LoveBeatsHB: Aber die Linken mimimimi !!!1!!! #AfD #noAfD #NazisRaus #FCKAFD https://t.co/OssMdaaucG. Is the given statement hateful?	1	yes.
The following statement is in German langauge and a native german speaker annotated this as hateful: RT @MagnumPhotos: Susan Meiselas wins the 2019 Deutsche Börse prize, Sohrab Hura collaborates with fashion designer Kiko Kostadinov, plus m…. Is the given statement hateful?	0	no
The following statement is in German langauge and a native german speaker annotated this as hateful: Hühner-Hof-Fest Steuden: 1. Deutsche Nudelkönigin Sandra I mit ihren Nudelkönigen... https://t.co/d39OTW0rmT. Is the given statement hateful?	0	no
The following statement is in German langauge and a native german speaker annotated this as hateful: @ZDFheute Die Gutmenschen, Prominente und Organisationen werdens schon richten und dafür sammeln!. Is the given statement hateful?	0	yes
The following statement is in German langauge and a native german speaker annotated this as hateful: Wenden Sie sich bitte an den deutschen Waffenhandel und deren Lobbyistin Frau Merkel!!!! Ich als deutscher Steuerza… https://t.co/XfJyhcjG9C. Is the given statement hateful?	0	yes.
The following statement is in German langauge and a native german speaker annotated this as hateful: RT @Hartes_Geld: Wer sich in #England zum Imam ausbilden lässt, lernt folgendes: "Allah ist glücklich, wenn Moslems ihre Frauen vergewaltig…. Is the given statement hateful?	1	yes
The following statement is in German langauge and a native german speaker annotated this as hateful: @erontmaloku HE LOREDANA HE HITLER ICH STERBE VOR LACHEN https://t.co/M4gzGcc9dv. Is the given statement hateful?	0	yes.
The following statement is in German langauge and a native german speaker annotated this as hateful: RT @0Siegfried: @tagesschau Der totale Irrsinn die Anhänger dieser Ideologie zu hofieren, und Maulkörbe gegen Andere zu verordnen. https://…. Is the given statement hateful?	0	yes
The following statement is in German langauge and a native german speaker annotated this as hateful: @focusonline Ich fordere Wiedereinführung der Todesstrafe für Politiker! Ich kann dies berliner rot rot grün nicht… https://t.co/AEUi4H3EZj. Is the given statement hateful?	1	yes
The following statement is in German langauge and a native german speaker annotated this as hateful: @gebirgsjager1 Genau das ist meine Meinung. Deutsche Politiker unter der Führung Merkel haben ganz Europa in ein Ch… https://t.co/csS9u9xRvG. Is the given statement hateful?	1	yes
The following statement is in German langauge and a native german speaker annotated this as hateful: RT @journaliszt: Schreibt man jetzt "Rammstein sind dumme Nazis" oder "Leute, die Rammstein nicht verstehen, sind dumme Nazis"? Ist nicht,…. Is the given statement hateful?	1	yes
The following statement is in German langauge and a native german speaker annotated this as hateful: RT @abc321xyblabla: Mal eine dumme Frage: Wodurch reduziert sich eigentlich das CO2 wenn ich eine Steuer oder ein Zertifikat erwerbe? Zerp…. Is the given statement hateful?	0	no.
The following statement is in German langauge and a native german speaker annotated this as hateful: RT @helllud123: Staatsfunk und Lügenpresse befinden sich im absoluten Panikmodus und verbreiten dummdreiste Lügen" "Portale, die zum Teil…. Is the given statement hateful?	1	yes
The following statement is in German langauge and a native german speaker annotated this as hateful: @fiischyyy Ja, alle sind dumm, außer du!! Was für eine Logik. Is the given statement hateful?	0	yes
The following statement is in German langauge and a native german speaker annotated this as hateful: @bettercallaxel Grüne eher nicht: https://t.co/OTwBikhJJ9. Is the given statement hateful?	0	no
The following statement is in German langauge and a native german speaker annotated this as hateful: RT @haniawiatrek: Die Grünen und Linken sind gegen Tierquälerei unterstützen aber Halal! Moslems dürfen in Deutschland Tiere quälen!. Is the given statement hateful?	0	yes
The following statement is in German langauge and a native german speaker annotated this as hateful: RT @JungereCato: Also Ihr Tol(l)eranten und linken Hyperintellektuellen fangt schon mal an Eure Musikinstrumente zu zerschlagen um Eure Gäs…. Is the given statement hateful?	1	yes
The following statement is in German langauge and a native german speaker annotated this as hateful: Nanny-Index - Rauchen, trinken, ungesundes Essen: Deutsche sind ein Albtraum für Krankenversicherer. Is the given statement hateful?	0	yes.
The following statement is in German langauge and a native german speaker annotated this as hateful: @ProudEUCitizen @HeikoMaas Die EU wird auch nie eine Nation sein. Aber was Maas macht, ist am ehesten als Nationalc… https://t.co/oXqm0DN5a9. Is the given statement hateful?	0	yes
The following statement is in German langauge and a native german speaker annotated this as hateful: RT @eraser_org: Echt jetzt, ihr habt das grüne Verräter- und Lügenpack gewählt? Wie oft lasst ihr euch noch verscheißern? #Europawahl. Is the given statement hateful?	1	yes
The following statement is in German langauge and a native german speaker annotated this as hateful: porno deutsch mallorca nackter sexy arsch meine frau ficken nackte frauenkrper bilder https://t.co/iGtkrGKHZT. Is the given statement hateful?	0	yes
The following statement is in German langauge and a native german speaker annotated this as hateful: pass that Deutsche. Is the given statement hateful?	0	yes
The following statement is in German langauge and a native german speaker annotated this as hateful: Hitler macht kein Deutschrap 6:1 hitler. Is the given statement hateful?	0	yes.
The following statement is in German langauge and a native german speaker annotated this as hateful: @maxotte_says Die grünen Philosophen an der Uni Köln, die Sie in deren schäbigen grauen Gebäude schon kennenlernten… https://t.co/YvnlRcImG1. Is the given statement hateful?	0	no
The following statement is in German langauge and a native german speaker annotated this as hateful: @BeniOurigal @Musclebear66 @tagesschau Na! die Flüchtlinge (Migranten) bekommen bestimmt kein Geld davon ab! Denk mal nach!. Is the given statement hateful?	0	yes
The following statement is in German langauge and a native german speaker annotated this as hateful: RT @creamspeak: Life-Hack: Vor der Magenspiegelung immer Hummer essen gehen damit der Arzt denkt "verdammt der hat genug Geld mich zu verkl…. Is the given statement hateful?	0	yes.
The following statement is in German langauge and a native german speaker annotated this as hateful: RT @a_weitkamp: Warum müssen wir Deutsche im Alleingang die Welt retten? Ich lehne die CO/2-Steuer ab und will mit meinem Diesel Euro 5 dur…. Is the given statement hateful?	0	yes
The following statement is in German langauge and a native german speaker annotated this as hateful: @tagesschau „Offener Brief von Mohssen Massarrat an Bundeskanzlerin Angela Merkel und Außenminister Heiko Maas.“ https://t.co/TnfOTsUaOq. Is the given statement hateful?	0	no
The following statement is in German langauge and a native german speaker annotated this as hateful: @Loay_Mudhoon @raz_u @SPIEGELONLINE Weil islam andres nicht kennt.... Is the given statement hateful?	0	yes
The following statement is in German langauge and a native german speaker annotated this as hateful: @darthtoastbrot Ekelhaft! Brauner Abschaum!. Is the given statement hateful?	1	yes
The following statement is in German langauge and a native german speaker annotated this as hateful: ich will einfach verschwinden wie falco. Is the given statement hateful?	0	no
The following statement is in German langauge and a native german speaker annotated this as hateful: @ferraeterin Weil feige Nazis nicht wie Nazis aussehen wollen https://t.co/6yz605OuvO. Is the given statement hateful?	0	yes.
The following statement is in German langauge and a native german speaker annotated this as hateful: RT @helllud123: @ZDFheute @sven_giegold @Joerg_Meuthen Mal sehen, ob die dumm-naiven Wessis noch immer den Grünen und ihrer Klimalüge nachr…. Is the given statement hateful?	1	yes
The following statement is in German langauge and a native german speaker annotated this as hateful: Merkel wäre das nicht passiert #AmthorVideo. Is the given statement hateful?	0	yes.
The following statement is in German langauge and a native german speaker annotated this as hateful: Checkt den mal ab hat aufjedenfall Potenzial! https://t.co/X8DvevBQRE. Is the given statement hateful?	0	yes.
The following statement is in German langauge and a native german speaker annotated this as hateful: RT @ab19868: Muslimische Welt empört Angola verbietet den Islam https://t.co/Q1UcQcrL8w. Is the given statement hateful?	0	yes
The following statement is in German langauge and a native german speaker annotated this as hateful: @SinOfSpeed weil ich dumm bin, denke ich.. Is the given statement hateful?	0	yes
The following statement is in German langauge and a native german speaker annotated this as hateful: Die Idioten Verbrecher und Wahnsinnigen im NRW-Landtag haben diesem Gesetz zugestimmt. https://t.co/8tfy8jcSdG https://t.co/vRPDSOkvNz. Is the given statement hateful?	0	yes.
The following statement is in German langauge and a native german speaker annotated this as hateful: Abbaurecht hört enneaeterisch. Is the given statement hateful?	0	no
The following statement is in German langauge and a native german speaker annotated this as hateful: RT @julia_verlinden: #Schneckentempo BuReg bei #Klimaschutz: bis 2030 will sie nur 13%Punkte besser werden -&gt; erst 2086 (!) wäre Wärmeverso…. Is the given statement hateful?	0	no
The following statement is in German langauge and a native german speaker annotated this as hateful: RT @Ricarda_Lang: Konservative: Die Linken machen nur noch Identitätspolitik und sind deshalb Schuld am Rechtsruck. Linke: Lasst mal über…. Is the given statement hateful?	0	no
The following statement is in German langauge and a native german speaker annotated this as hateful: sofort diese masken dreck von meine gesicht. auch raus aus meinen gesäß, bauch. die NSA soll die schlangen weg, sof… https://t.co/Q23SXXY3rI. Is the given statement hateful?	0	yes
The following statement is in German langauge and a native german speaker annotated this as hateful: RT @Hadmut: Blog: Merkels 2002-zu-2015-Wende https://t.co/AJ29pIJsAW. Is the given statement hateful?	0	yes
The following statement is in German langauge and a native german speaker annotated this as hateful: RT @Schlawiner8: @EMMA_Magazin @SonjadelaRosa7 @MEEDIA Die nützlichen Idioten sind sie linken Verteidiger des Islam. Früher haben die Linke…. Is the given statement hateful?	0	yes.
The following statement is in German langauge and a native german speaker annotated this as hateful: RT @Schwulemiker: Der Linke hasst jeden, der sich etwas aufgebaut, etwas geleistet hat. Denn diese Menschen führen dem Linken täglich vor,…. Is the given statement hateful?	1	yes
The following statement is in German langauge and a native german speaker annotated this as hateful: #zdf #meinerstesmal zeigt mir nur wie Politiker sich immer wieder ins rechte Licht rücken. #ekelhaft. Is the given statement hateful?	0	yes.
The following statement is in German langauge and a native german speaker annotated this as hateful: RT @Jesus_folgen: @HaraldBecker80 Als Gegenbeispiel gibt es ein Video, in dem gezeigt wird, wie die DEUTSCHE BUNDESKANZLERIN NAMENS MERKEL…. Is the given statement hateful?	0	yes.
The following statement is in German langauge and a native german speaker annotated this as hateful: Uhhhhhhh, wie kann man so.... nichtmal dumm sein, keine Ahnung was das ist xD. Is the given statement hateful?	0	yes
The following statement is in German langauge and a native german speaker annotated this as hateful: die burger sehen aus wie ein göt und ich krieg dieses bild nichtmehr aus meinem kopf. Is the given statement hateful?	0	yes
The following statement is in German langauge and a native german speaker annotated this as hateful: RT @jan_buehlbecker: #AfD-Politiker Reil sagt, dass Europaparlament sei überflüssig "wie ein Pickel am Arsch". Eine solche Parlamentsverach…. Is the given statement hateful?	0	yes
The following statement is in German langauge and a native german speaker annotated this as hateful: RT @4Kolner: #soisset Hat die Kirche damals doch schon den Nazis geholfen, so verwundert mich es nicht, dass es heute erneut passiert. "N…. Is the given statement hateful?	1	yes.
The following statement is in German langauge and a native german speaker annotated this as hateful: Deutsche Grey‘s Anatomy https://t.co/os4nMsQyy9. Is the given statement hateful?	0	no.
The following statement is in German langauge and a native german speaker annotated this as hateful: RT @Hagen_Rether: Dem weißen Mann geht der Arsch auf Grundeis, weil er merkt, dass er langsam in die Unterzahl kommt. So viel Grundeis gibt…. Is the given statement hateful?	0	yes
The following statement is in German langauge and a native german speaker annotated this as hateful: @kernkraftzwerg Ich hätte auch eher was anderes vernascht, als den Kopf. 😅. Is the given statement hateful?	0	no
The following statement is in German langauge and a native german speaker annotated this as hateful: RT @deutsch365: Muslimische Welt empört: Angola verbietet den Islam - https://t.co/6ynyw2sES9 https://t.co/ey8UhB5bP9. Is the given statement hateful?	0	yes.
The following statement is in German langauge and a native german speaker annotated this as hateful: @weird_booknerd Ich möchte kotzen und weinen auf einmal.. Is the given statement hateful?	0	yes
The following statement is in German langauge and a native german speaker annotated this as hateful: RT @StefanHechl: Das ist halt echt aus dem Playbook der 1930er https://t.co/zyOwVwqWFd. Is the given statement hateful?	0	no
The following statement is in German langauge and a native german speaker annotated this as hateful: @heinzschmidt41 wie viele deutsche Politiker. Is the given statement hateful?	0	yes
The following statement is in German langauge and a native german speaker annotated this as hateful: @MRSL0NELYY JEDES MAL EINFACH. Is the given statement hateful?	0	no
The following statement is in German langauge and a native german speaker annotated this as hateful: Am krank sein hasse ich am meisten die Gliederschmerzen... Ohne scheiß, welcher Vollhorst hat das denn bitte erfunden!??. Is the given statement hateful?	0	yes
The following statement is in German langauge and a native german speaker annotated this as hateful: HAHA 😂 versteht ihr?? Die Sind halt einfach DUMMM 😂😂 Alle ausbürgern einfach 😂 oder MAUER BAUEN 🤪🤪. Is the given statement hateful?	1	yes
The following statement is in German langauge and a native german speaker annotated this as hateful: 🔥 Deutsche Telekom hat Probleme seit 04:20 nachm. CET. 👉 https://t.co/gmXT132s4u RT hat auch Probleme #TelekomDown https://t.co/jGSXL1eiyw. Is the given statement hateful?	0	no
The following statement is in German langauge and a native german speaker annotated this as hateful: RT @TuncayOezdamar: “Regulierung von Meinungsäußerungen” Wir Türken kennen das irgendwoher. https://t.co/CYF8JG3jK9. Is the given statement hateful?	0	yes
The following statement is in German langauge and a native german speaker annotated this as hateful: @lehrbuda @EDreisvogt @moritur_et_ride @PIRATEN_Saar @rezomusik Es ist einfach aus der Ferne so etwas rauszuhauen u… https://t.co/4ZpqDryNdk. Is the given statement hateful?	0	no
The following statement is in German langauge and a native german speaker annotated this as hateful: @untenistoben Unfassbar. Merkel muss weg!. Is the given statement hateful?	0	yes
The following statement is in German langauge and a native german speaker annotated this as hateful: scheiß bauchschmerzen. Is the given statement hateful?	0	yes
The following statement is in German langauge and a native german speaker annotated this as hateful: RT @Korallenherz: Nazis sind Nazis weil sie Nazis sind. Nicht dumm, blöd, krank, irre oder oder oder. Lasst das.. Is the given statement hateful?	0	yes.
The following statement is in German langauge and a native german speaker annotated this as hateful: @EichiBLUBBBEL @AFPde @greenpeace_de @ZDFheute 4. Merkel muss weg, CDU muss weg. Is the given statement hateful?	1	yes
The following statement is in German langauge and a native german speaker annotated this as hateful: Branchenblätter brauchen Headlines, diese ist allerdings selten dämlich. Mein Eindruck auf der OMR war ein völlig.… https://t.co/Y6vqrhnU4z. Is the given statement hateful?	0	no
The following statement is in German langauge and a native german speaker annotated this as hateful: RT @SPIEGELONLINE: Die Präsidentin der "Harvard Alumni Association" bedankte sich bei #Merkel nach ihrer umjubelten Rede – und sagt dann nu…. Is the given statement hateful?	0	no
The following statement is in German langauge and a native german speaker annotated this as hateful: RT @lawyerberlin: Auch #Merkel, #Maas und #Habeck können nicht verhindern, dass man sich an der Frühlingssonne erfreut. „Die Kunst glücklic…. Is the given statement hateful?	0	no
The following statement is in German langauge and a native german speaker annotated this as hateful: RT @coraxaroc: Nazis. Es sind Nazis. Neons sind Reklame oder Fische und leuchten hübsch bunt. https://t.co/h4hE438D5y. Is the given statement hateful?	0	yes.
The following statement is in German langauge and a native german speaker annotated this as hateful: @PoetMehmet Alle Frauen sind halt Schlampen die in die Küche sollen. Is the given statement hateful?	1	yes.
The following statement is in German langauge and a native german speaker annotated this as hateful: @ZDF Grüne 20,5% ?! Germany is doomed!. Is the given statement hateful?	1	yes
The following statement is in German langauge and a native german speaker annotated this as hateful: RT @SM100d: Deutsche Demokratie Deutschland 2019 https://t.co/ul8HQ9obZL. Is the given statement hateful?	0	yes
The following statement is in German langauge and a native german speaker annotated this as hateful: @jeonpokpok hEnLoOOoo oOmF h3h3 :"&gt;. Is the given statement hateful?	0	yes
The following statement is in German langauge and a native german speaker annotated this as hateful: @hanvoi Es wird Zeit, dass Plauen unter Bundesaufsicht gestellt wird. Dann kann mit dem braunen Pack mal aufgeräumt werden!. Is the given statement hateful?	1	yes.
The following statement is in German langauge and a native german speaker annotated this as hateful: @jesus_frank So ist es. Aber da es eine Grüne von sich gab u noch dazu gegen Deutsche, wird es beklatscht.. Is the given statement hateful?	0	yes
The following statement is in German langauge and a native german speaker annotated this as hateful: RT @deutsch365: ‼️‼️ Donald Trump Das deutsche Volk wird Angela Merkel stürzen‼️‼️ https://t.co/TY3f7wimF5. Is the given statement hateful?	0	yes
The following statement is in German langauge and a native german speaker annotated this as hateful: Ich sehe schon kommen, dass die Grünen aus meinem Ortsverband bei mir anfragen, ob ich in den Gemeinderat möchte, w… https://t.co/kutVHvhIGb. Is the given statement hateful?	0	no
The following statement is in German langauge and a native german speaker annotated this as hateful: „Die Wähler sind halt zu dumm, sodass wir ihnen unsere Positionen nicht vermitteln konnten. Diese Verachtung für si… https://t.co/rMolA6HBKi. Is the given statement hateful?	1	yes.
The following statement is in German langauge and a native german speaker annotated this as hateful: RT @helllud123: @ZDFheute Tja, das zeigt nur einmal mehr, wie unfassbar unfähig die linksradikalen Altparteien sind. Außer Hetze und indire…. Is the given statement hateful?	0	yes
The following statement is in German langauge and a native german speaker annotated this as hateful: RT @ChrisVelten1: @Lebensformation Was soll das bitte für eine uns "bereichernde Kultur" sein, in der es zum Imponieren bei Frauen reicht,…. Is the given statement hateful?	1	yes
The following statement is in German langauge and a native german speaker annotated this as hateful: RT @frankundfreya: Kasperletheater für dumme Kartoffeln https://t.co/6OGaAcr0a2. Is the given statement hateful?	1	yes.
The following statement is in German langauge and a native german speaker annotated this as hateful: RT @_NameVergeben: man erkennt lgbt+ leute daran dass sie immer auf dem boden sitzen FAKT. Is the given statement hateful?	0	yes
The following statement is in German langauge and a native german speaker annotated this as hateful: @verpeilteTomate Das schaff ich mit meinem Auto. Da hab ich jetzt so viel Scheiß rausgeräumt, das wiegt jetzt nix m… https://t.co/Qdg9ucmGIQ. Is the given statement hateful?	0	no
The following statement is in German langauge and a native german speaker annotated this as hateful: @Tulpa2230 @ZDFheute @PeterToitberg @ArminWolf Die Arroganz der Linken schadet nicht nur dem politischen Diskurs so… https://t.co/5EElap5LXN. Is the given statement hateful?	1	yes.
The following statement is in German langauge and a native german speaker annotated this as hateful: RT @oxensepp: @katjakipping Also Katja, ich wäre eher dafür, erstmal die Linke, genauer gesagt die SED zu enteignen. Wo habt ihr denn die K…. Is the given statement hateful?	0	yes
The following statement is in German langauge and a native german speaker annotated this as hateful: RT @UgMads: ZDF lüftet pikantes Geheimnis um Angela Merkel https://t.co/pZY9byIr7u. Is the given statement hateful?	0	yes
The following statement is in German langauge and a native german speaker annotated this as hateful: RT @knastdichti: deutsche 1933 deutsche 2019 🤝 faschisten nicht bekämpfen sondern ihnen hoh…. Is the given statement hateful?	0	yes.
The following statement is in German langauge and a native german speaker annotated this as hateful: @AndreaSchlegel3 @sheelockmaier Jegliches Wort vom Islam bestätigt seine Rückständigkeit und Inkompatibilität. Jedes.. Is the given statement hateful?	1	yes
The following statement is in German langauge and a native german speaker annotated this as hateful: @ZDFheute Linke Indoktrinierung an Schulen und Unis. Dauerwerbung der Medien für die Grünen.. Is the given statement hateful?	0	yes
The following statement is in German langauge and a native german speaker annotated this as hateful: @nERDANZIEHUNG @DF_Chris Parallel zu den Letztwählern gibt es halt auch Letztgewählte.. Is the given statement hateful?	0	yes
The following statement is in German langauge and a native german speaker annotated this as hateful: RT @MOKoffiziell: diese dinger machen frauen 9000% unattraktiver https://t.co/jCBoQZDAQa. Is the given statement hateful?	0	yes
The following statement is in German langauge and a native german speaker annotated this as hateful: @vonBuehlau DIESER FUCKING REZO IS NE SCHEIß LINKE ZECKE! NIEDER MIT DEM GRÜNEN UND ROTEN PACK!. Is the given statement hateful?	1	yes
The following statement is in German langauge and a native german speaker annotated this as hateful: RT @Zar2001doz: @tagesschau Trump war im Dezember in Deutschland, ohne Merkel und Maas überhaupt bescheid zu geben. Jetzt versetzt Pompeo d…. Is the given statement hateful?	0	no
The following statement is in German langauge and a native german speaker annotated this as hateful: Der Fellgerber kehrt zurück https://t.co/TtZZ39jGes. Is the given statement hateful?	0	no.
The following statement is in German langauge and a native german speaker annotated this as hateful: RT @RealSHIRA: Grüne Heuchler https://t.co/OEUUxedlRM. Is the given statement hateful?	1	yes.
The following statement is in German langauge and a native german speaker annotated this as hateful: RT @SteinbachErika: Hier geht es vor allem um die Pro-Pädophilenpolitik der Grünen. Bis zum heutigen Tage haben die Grünen die Opfer nicht…. Is the given statement hateful?	1	yes.
The following statement is in German langauge and a native german speaker annotated this as hateful: RT @bodoramelow: Ich kann es einfach nicht glauben! Seifenkistenrennen absagen für Kinder und Nazis marschieren lassen? Mehr Platz für Kin…. Is the given statement hateful?	0	yes
The following statement is in German langauge and a native german speaker annotated this as hateful: @mjungclaus GRÜNE = Umweltschänder https://t.co/Dj8ZLmXtMP und 2.#Beweis der #Grünen-#SPD Klimaschutz-#Lüge:… https://t.co/eV1E1PLq0F. Is the given statement hateful?	1	no
The following statement is in German langauge and a native german speaker annotated this as hateful: @OnryouYuurei Ich hatte es grade auch im Kopf 🙈🙈🙈. Is the given statement hateful?	0	no
The following statement is in German langauge and a native german speaker annotated this as hateful: RT @Complaxes: Könnte kotzen. Ich hasse die Fans unseres Vereins. https://t.co/GS0hXKPzbn. Is the given statement hateful?	1	yes
The following statement is in German langauge and a native german speaker annotated this as hateful: @SvenjaSchulze68 Haltet ihr uns wirklich für so dumm oder seid ihr es?. Is the given statement hateful?	0	yes
The following statement is in German langauge and a native german speaker annotated this as hateful: ICH FICK DICH IN DEN ARSCH! KANACKE! ICH FICK DICH IN DEN ARSCH!. Is the given statement hateful?	1	yes
The following statement is in German langauge and a native german speaker annotated this as hateful: @SawsanChebli Passen Sie auf die Leute die sie nicht mögen als Nazi zu bezeichnen. Hoffentlich zeigt sie jemand an.… https://t.co/PbHhAjh3x3. Is the given statement hateful?	0	yes.
The following statement is in German langauge and a native german speaker annotated this as hateful: RT @sulemannmalik: Gehört der Islam zu Deutschland? Deutschland ist ein säkularer Staat.Entsprechend gehört Deutschland keiner Religion an.…. Is the given statement hateful?	0	no
The following statement is in German langauge and a native german speaker annotated this as hateful: @welt Wieso schauen die meisten „Influenzer“ alle aus wie irgend ein Clown??? ninja hat angerufen, er will seine blaue Perücke zurück. Is the given statement hateful?	0	yes
The following statement is in German langauge and a native german speaker annotated this as hateful: RT @sueszling: Ich hasse Deutsche https://t.co/mM6l8mFOWY. Is the given statement hateful?	1	yes.
The following statement is in German langauge and a native german speaker annotated this as hateful: @knallfrog Fussballfans sind dänk schlimmer als nazis! 😂. Is the given statement hateful?	1	yes.
The following statement is in German langauge and a native german speaker annotated this as hateful: @zerbrxsler @GPRealomon @ZDFheute @ARDde @ZDF Haben Sie eigentlich schon mal an fachkundige Hilfe ihres Psychiaters gedacht???. Is the given statement hateful?	1	yes
The following statement is in German langauge and a native german speaker annotated this as hateful: @ZDFheute Deutsche Neider und ihre Komplexe mit der Türkei.... Is the given statement hateful?	0	yes
The following statement is in German langauge and a native german speaker annotated this as hateful: Gratulation zu 3 Sitzen @DiePARTEI @MartinSonneborn @nicosemsrott. Is the given statement hateful?	0	no.
The following statement is in German langauge and a native german speaker annotated this as hateful: Hat heute im linken Halswirbel auuuaaa es will das Unreine Nervenwasser bei mir sein. Is the given statement hateful?	0	yes
The following statement is in German langauge and a native german speaker annotated this as hateful: Vom „Fabrikle“ zum Global Player – das ist unsere #Unternehmensgeschichte, die ab nun auch auf Englisch hanserliter… https://t.co/z3C7xaYyF1. Is the given statement hateful?	0	no
The following statement is in German langauge and a native german speaker annotated this as hateful: @Hendricus56 @Bear_Greeter @drguidoknapp Stimmt, die frage ist halt nur ob man sich für Mindestlohn bücken möchte oder nicht.... Is the given statement hateful?	0	no
The following statement is in German langauge and a native german speaker annotated this as hateful: @realredknight @mh120480 Ich habe eher das Gefühl das es die linken Parteien nicht schaffen ihre Jungen und durch d… https://t.co/86vJNyzHjm. Is the given statement hateful?	0	no
The following statement is in German langauge and a native german speaker annotated this as hateful: RT @VogelSabine: @Alice_Weidel @ainyrockstar Solche Fachkräfte brauchen wir hier nicht !!! Die Moslems leben doch noch in der Steinzeit, al…. Is the given statement hateful?	1	yes
The following statement is in German langauge and a native german speaker annotated this as hateful: RT @WeeberWolfgang: @michelreimon Widerwärtig, dumm und überflüssig, was dieses Revolverblatt da verbreitet!. Is the given statement hateful?	1	yes
The following statement is in German langauge and a native german speaker annotated this as hateful: es gibt tatsächlich Tage an denen ich mir selbst Sigmar Gabriel zurückwünsche https://t.co/YDWG5WS79L. Is the given statement hateful?	0	no
The following statement is in German langauge and a native german speaker annotated this as hateful: @halia_yee_ durex &gt; trojan. Is the given statement hateful?	0	no.
The following statement is in German langauge and a native german speaker annotated this as hateful: @just_n3rdy *einfach mal so den Nacken krault....* :D :D :D :. Is the given statement hateful?	0	no
The following statement is in German langauge and a native german speaker annotated this as hateful: Du meine Güte @digitec_de! Ich habe doch schon mehr als genug iPads! Bringt mich nicht auf dumme Ideen 😂😂😂 https://t.co/J57pCpstrE. Is the given statement hateful?	0	no
The following statement is in German langauge and a native german speaker annotated this as hateful: RT @Arnd_Schumacher: @AF_Will @TimmermansEU Schwache EU-Aussenpolitik sorgt dafür, dass der Islam bald zu Europa gehört. Der UN-#Migrations…. Is the given statement hateful?	0	yes
The following statement is in German langauge and a native german speaker annotated this as hateful: Es hört nicht auf.. Is the given statement hateful?	0	no
The following statement is in German langauge and a native german speaker annotated this as hateful: @Pukhovka Verdammt, warum sehe ich das jetzt erst?. Is the given statement hateful?	0	no
The following statement is in German langauge and a native german speaker annotated this as hateful: @cem_oezdemir Grüne sind russophobe Faschisten. Is the given statement hateful?	1	yes
The following statement is in German langauge and a native german speaker annotated this as hateful: @AfD_Hamburg Boah seid ihr dumm! Scheiß Afd scheiß nazis! Verpisst euch einfach!. Is the given statement hateful?	1	yes.
The following statement is in German langauge and a native german speaker annotated this as hateful: Wäre voll cool wenn man einfach sein Gehirn gegen ein gutes tauschen könnte https://t.co/sg4dtDhW7M. Is the given statement hateful?	0	no
The following statement is in German langauge and a native german speaker annotated this as hateful: FPÖ-Funktionärin tritt nach Hetz-Postings zurück: Nachdem erst Ende April der Braunauer FPÖ-Vizebürgermeister Chris… https://t.co/jAG8uyxRmB. Is the given statement hateful?	0	no
The following statement is in German langauge and a native german speaker annotated this as hateful: Mathe ist einfach. Is the given statement hateful?	0	no.
The following statement is in German langauge and a native german speaker annotated this as hateful: RT @GolinehAtai: Erinnert mich an Merkels allererste Kennzeichnung der #FridaysForFuture Bewegung als „asymmetrische Kriegsführung“. Solch…. Is the given statement hateful?	0	yes
The following statement is in German langauge and a native german speaker annotated this as hateful: Hirn, lass locker, ich regel das schon ☝. Is the given statement hateful?	0	no.
The following statement is in German langauge and a native german speaker annotated this as hateful: RT @rhythm_rhymes: Wir sitzen alle nicht in diesem Boot. #fckafd https://t.co/hhmTzZjfo2. Is the given statement hateful?	1	yes.
The following statement is in German langauge and a native german speaker annotated this as hateful: @Venitroll @Mathyvin Zum Kotzen diese Politik zurzeit. Is the given statement hateful?	1	yes.
The following statement is in German langauge and a native german speaker annotated this as hateful: Was geschieht, wenn deutsche Familien #Austauschschüler aufnehmen: mal die übliche Teenager-Mühsal, mal Sitcom, mal… https://t.co/bPIwteQK4v. Is the given statement hateful?	0	yes
The following statement is in German langauge and a native german speaker annotated this as hateful: Zurück ins Jugendzimmer https://t.co/BtBtk4z5qr. Is the given statement hateful?	0	yes
The following statement is in German langauge and a native german speaker annotated this as hateful: @timolammert Keine Tribüne -&gt; kein Ground 🤷🏻‍♂️. Is the given statement hateful?	0	no
The following statement is in German langauge and a native german speaker annotated this as hateful: RT @city0815: am meisten hasse ich die linken mittlerweile dafür, dass ich bereits anfange, rechte zu verteidigen. 🙄. Is the given statement hateful?	1	yes
The following statement is in German langauge and a native german speaker annotated this as hateful: Lass uns einfach mal Dopamin vergeuden ✨. Is the given statement hateful?	0	no.
The following statement is in German langauge and a native german speaker annotated this as hateful: RT @HaraldRostock: Der renommierte deutsche Anwalt Wilfried Schmitz hat Strafanzeige gegen Merkel und ihre amtlichen Mitarbeiter „wegen Bet…. Is the given statement hateful?	0	yes.
The following statement is in German langauge and a native german speaker annotated this as hateful: @Okee42203068 Die Grünen aber auch nicht!!. Is the given statement hateful?	0	no
The following statement is in German langauge and a native german speaker annotated this as hateful: @AndreasStraub Ich würde nicht blöd sagen, sondern eher verblendet, sie haben sich von linken Rassisten leimen lass… https://t.co/HZgvuLkgW8. Is the given statement hateful?	0	yes.
The following statement is in German langauge and a native german speaker annotated this as hateful: RT @Bjrn17547904: @gruenenrw @Die_Gruenen Nein zum Nationalmasochismus der Grünen und anderen Linken Geisteskranken !!! https://t.co/8Jr1Zz…. Is the given statement hateful?	1	yes
The following statement is in German langauge and a native german speaker annotated this as hateful: RT @masyaf_sy: Das halte ich für groben Unfug. Oder die Propaganda der Öffentlich-Rechtlichen ist effektiver und die Deutschen als Ganzes s…. Is the given statement hateful?	0	yes
The following statement is in German langauge and a native german speaker annotated this as hateful: RT @den_tyske: ... gibt es wirklich noch Idioten die denken, dass sich der Islam bzw. Muslime domestizieren lassen, geschweige denn integri…. Is the given statement hateful?	1	yes.
The following statement is in German langauge and a native german speaker annotated this as hateful: RT @Horst_Hutzel: Die ersten Tage nach einer Wahl. Die Zeit, in der die deutsche Einheit ihr wahres Gesicht zeigt.. Is the given statement hateful?	0	yes
The following statement is in German langauge and a native german speaker annotated this as hateful: ... jetzt reißt Euch den Arsch für den #VfB Stuttgart auf!!!. Is the given statement hateful?	0	no
The following statement is in German langauge and a native german speaker annotated this as hateful: Martin Schulz @MartinSchulz. Is the given statement hateful?	0	yes
The following statement is in German langauge and a native german speaker annotated this as hateful: @bernd471 @Silke1974geb @Mrchentante1 Die Linken und Grünen scheinbar doch!. Is the given statement hateful?	0	yes.
The following statement is in German langauge and a native german speaker annotated this as hateful: @Karl_Lauterbach Du Super Spinner! Ihr seit doch die Mietpreis Wucherer mit Eurem Styropor " das Pack" Gabriel. Verlogene Scheiss Partei. Is the given statement hateful?	1	yes
The following statement is in German langauge and a native german speaker annotated this as hateful: @DracheSchaut Hätte mich auch gewundert wenn copy und paste zu einfach wäre. Is the given statement hateful?	0	no
The following statement is in German langauge and a native german speaker annotated this as hateful: https://t.co/JQvlVLegh7 Grundrente für jeden , Auch für faulenzer, Flüchtlinge und Asylanten . Weswegen Arbeiten wir eigentlich noch?? .. Is the given statement hateful?	1	yes
The following statement is in German langauge and a native german speaker annotated this as hateful: RT @gorezilla360: @HolgerEwald1 @verusoss1 @China_Welt_News Genau das sind keine Flüchtlinge! Hört endlich auf, dieses Wort zu benutzen! Wo…. Is the given statement hateful?	0	yes
The following statement is in German langauge and a native german speaker annotated this as hateful: @nachtlos Ich spekuliere auf Karmadingsbums. Dumm ist nur, dass sich Y. für moralisch überlegen hält. Ich glaube, ich lache jetzt schon. 😁. Is the given statement hateful?	0	yes
The following statement is in German langauge and a native german speaker annotated this as hateful: Das Kopftuch und die Linke - Wie faschistisch ist die Antifa? - https://t.co/TIDDeQpB4G Zukunft Leben Ist der Kam… https://t.co/KbOM9P3FQz. Is the given statement hateful?	0	yes
The following statement is in German langauge and a native german speaker annotated this as hateful: Fraktionen beklagen Ausschluss: Grüne und Linke attackieren Seehofer wegen Einheitsfeier https://t.co/sgSOEWNJZa. Is the given statement hateful?	0	yes
The following statement is in German langauge and a native german speaker annotated this as hateful: Die grünen #Europawahl2019 https://t.co/BHWUH7d01c. Is the given statement hateful?	0	yes.
The following statement is in German langauge and a native german speaker annotated this as hateful: RT @AvalancheGerman: @deutsch365 Verdammte Zecken! Einfach mennschenverachtend die Ideologie der #ANTIFA. Eins ist sicher, wäre #Hitler heu…. Is the given statement hateful?	1	yes.
The following statement is in German langauge and a native german speaker annotated this as hateful: @GebtName Dumm wenn du jetzt alles hinschmeißt und aufgibst. Is the given statement hateful?	0	no
The following statement is in German langauge and a native german speaker annotated this as hateful: RT @Reiner02192679: #Grüne sind in jeder Beziehung in der Politik und im Privaten, die aller Schlimmsten! Finger weg, von den #Grünen https…. Is the given statement hateful?	1	yes.
The following statement is in German langauge and a native german speaker annotated this as hateful: @tagesschau Dorr Ami holt mal wieder seine ganze Gestörtheit mit Waffen raus, und die Welt, besonders Dschland badets wieder aus!. Is the given statement hateful?	0	yes
The following statement is in German langauge and a native german speaker annotated this as hateful: RT @HelalBeauty: Es ist genau ein Hochamt zu Erbauung. Die Linke wird immer hirnlosen Abschaum ohne Potential anziehen. Wie das halt ist, w…. Is the given statement hateful?	1	yes
The following statement is in German langauge and a native german speaker annotated this as hateful: @franz_salzmann @tagesschau Als Minister benötigt man halt noch nicht mal einen Schulabschluss und Ahnung von dem A… https://t.co/AqXiFaIAqD. Is the given statement hateful?	0	yes.
The following statement is in German langauge and a native german speaker annotated this as hateful: RT @Katerfrieden: Ich bin dafür dass die Grünen das Geschoß ertragen. https://t.co/E8azul8WmQ. Is the given statement hateful?	0	yes
The following statement is in German langauge and a native german speaker annotated this as hateful: @dieserbutzi Ich Neonlicht einfach Christine und alles ist palleti. Is the given statement hateful?	0	no
The following statement is in German langauge and a native german speaker annotated this as hateful: Iven Axen Blitzschutz GmbH -&gt; https://t.co/dxBBc9QDkH. Is the given statement hateful?	0	yes
The following statement is in German langauge and a native german speaker annotated this as hateful: @janboehm @ORF Man schüttelt einfach nur noch peinlich berührt den Kopf und denkt sich OIDA!. Is the given statement hateful?	0	no
The following statement is in German langauge and a native german speaker annotated this as hateful: RT @Schwulemiker: Vergesst niemals was der Islam ist! Schaut Euch die Gesellschaften an, in denen der Islam die Mehrheit stellt! Seht, welc…. Is the given statement hateful?	1	yes
The following statement is in German langauge and a native german speaker annotated this as hateful: RT @KittoDario: Erst @Stephan535 und jetzt @Buje78. @TwitterDE, lasst den Scheiß!. Is the given statement hateful?	0	yes
The following statement is in German langauge and a native german speaker annotated this as hateful: @SPIEGEL_Politik @SPIEGELONLINE Politiker sind die größten klimaschädlichen Treibhausgase Verbrecher.. Is the given statement hateful?	1	yes
The following statement is in German langauge and a native german speaker annotated this as hateful: RT @Ijoba_xpensive: DJ Zinhle X Dammy Krane X Gabriel Youngstar – Heavy Duty https://t.co/oRUavR8iy4. Is the given statement hateful?	0	no.
The following statement is in German langauge and a native german speaker annotated this as hateful: Frau kam grade nach Hause ,,Haste die Prognosen gesehen?Die scheiß Kinder u ihr Klima!“ Ich: das Zitat twitter i… https://t.co/ahb2QlGHhX. Is the given statement hateful?	0	yes.
The following statement is in German langauge and a native german speaker annotated this as hateful: @StBrandner Gar nicht, unsere Politiker sind nur Macht - und Geldgierig. Das Deutsche Volk interessiert sie nicht im geringsten.. Is the given statement hateful?	1	yes
The following statement is in German langauge and a native german speaker annotated this as hateful: @Rockstarleben Ich halte mich mittlerweile echt zurück. 😇. Is the given statement hateful?	0	no.
The following statement is in German langauge and a native german speaker annotated this as hateful: @NewsCompact Der Islam ist die Weltanschauung des Teufels!. Is the given statement hateful?	1	yes
The following statement is in German langauge and a native german speaker annotated this as hateful: RT -&gt; IHelzer_:https://t.co/2AfIFnxX8i. Is the given statement hateful?	0	yes
The following statement is in German langauge and a native german speaker annotated this as hateful: Heeeey duuu scheiß scheiß Schwuchteltier, scheiß scheiß Schwuchteltier!. Is the given statement hateful?	1	yes.
The following statement is in German langauge and a native german speaker annotated this as hateful: RT @golem: Flugtaxi: Fünfsitziger Lilium Jet hebt erstmals ab #elektroflieger https://t.co/GnaUHP9NOZ. Is the given statement hateful?	0	no
The following statement is in German langauge and a native german speaker annotated this as hateful: @ZtarEid @MULTR4BR41N Es musste einfach mal wieder sein. Is the given statement hateful?	0	yes
The following statement is in German langauge and a native german speaker annotated this as hateful: RT @FurzkissenN: Allah ist ein hurensohn. Is the given statement hateful?	1	yes
The following statement is in German langauge and a native german speaker annotated this as hateful: 2/2 31.05.2018 - ich ziehe Suarez und CR7 in einem Pack https://t.co/vJMAC4JZut. Is the given statement hateful?	0	yes.
The following statement is in German langauge and a native german speaker annotated this as hateful: RT @DfaCheck: Frau Merkel (Bundeskanzlerin) hat gesagt, man soll nicht zulassen, dass der Rechtspopulismus stärker und lauter wird! Hier me…. Is the given statement hateful?	0	no
The following statement is in German langauge and a native german speaker annotated this as hateful: Ich hasse minecraft warum spiel ich den scheiß noch. Is the given statement hateful?	0	yes
The following statement is in German langauge and a native german speaker annotated this as hateful: RT @h4usmeister: Es wäre echt schon mal ein Anfang, wenn nicht jeder Vollidiot seinen Scheiß in der Natur entsorgen würde. https://t.co/hIt…. Is the given statement hateful?	1	no
The following statement is in German langauge and a native german speaker annotated this as hateful: Wahlsieg der Grünen in Tübingen: Grüner geht’s kaum https://t.co/UzNqO8RJRt https://t.co/jB4fvLkpM5. Is the given statement hateful?	0	no.
The following statement is in German langauge and a native german speaker annotated this as hateful: RT @SteinbachErika: Erst Wasser predigen, und dann Champagner saufen..... So waren die Grünen und so sind sie immer noch... https://t.co/ud…. Is the given statement hateful?	1	yes
The following statement is in German langauge and a native german speaker annotated this as hateful: Frau Merkel, handeln Sie! https://t.co/lv959vDff5. Is the given statement hateful?	0	yes
The following statement is in German langauge and a native german speaker annotated this as hateful: @nicolangecdu Klimaschutz nicht da, aber massive Kohleabbau. Armee am Arsch. Protest als Mob bezeichnen. Jetzt Yout… https://t.co/Its0yoHvCw. Is the given statement hateful?	0	yes.
The following statement is in German langauge and a native german speaker annotated this as hateful: @frauE_ausB Du leckst den ab????🙄. Is the given statement hateful?	0	yes.
The following statement is in German langauge and a native german speaker annotated this as hateful: RT @BoserEr: @maxotte_says Merkel muss weg.. Is the given statement hateful?	0	yes.
The following statement is in German langauge and a native german speaker annotated this as hateful: @PsychBSC @fanvomscf @Canstatt93 @fcunion Warum schaffen wir nich einfach das auf- und absteigen ab? 😂😂😂. Is the given statement hateful?	0	no
The following statement is in German langauge and a native german speaker annotated this as hateful: RT @uedio: Medien sollen erst die AfD hochgeschrieben haben und dann die Grünen und hey, wenn das so einfach ist, bin ich dafür, dass wir u…. Is the given statement hateful?	0	yes
The following statement is in German langauge and a native german speaker annotated this as hateful: RT @helarctos: Wo sind die Frauen? Sitzen die den Herren gegenueber? Oder am Katzentisch? Oder in der Kueche? Wo sind die Frauen? https://t…. Is the given statement hateful?	0	yes
The following statement is in German langauge and a native german speaker annotated this as hateful: @Ruebenhorst Diese Islamisten erscheinen irgendwie undankbar. Oder dumm. Vermutlich beides.. Is the given statement hateful?	1	yes
The following statement is in German langauge and a native german speaker annotated this as hateful: @FussiRud @efganidoenmez Scheiß Abschaum was bilden die sich ein!. Is the given statement hateful?	1	yes
The following statement is in German langauge and a native german speaker annotated this as hateful: RT @shlomosapiens: He, Linke - pssst: Hier sind mal echte Nazis, an denen Ihr Euch abarbeiten könnt. Nur so als Tipp. https://t.co/QnQfomDy…. Is the given statement hateful?	0	yes.
The following statement is in German langauge and a native german speaker annotated this as hateful: RT @zeitonline: Bei der Europawahl werden die deutschen Grünen wohl ein Rekordergebnis erzielen. Doch wie sieht es eigentlich im Rest von E…. Is the given statement hateful?	0	no
The following statement is in German langauge and a native german speaker annotated this as hateful: einfach nur ich https://t.co/aGSxZJoyhG. Is the given statement hateful?	0	no.
The following statement is in German langauge and a native german speaker annotated this as hateful: @natascher_ Tönung = kurzhaltende Haarfarbe einfach?. Is the given statement hateful?	0	no
The following statement is in German langauge and a native german speaker annotated this as hateful: RT @spitze19: @namifay @Nooirine Was soll diese Scheiß..??? Arschloche Deutschen Leuten. Kartoffelfresser. Kommt doch mal nach Thailand, da…. Is the given statement hateful?	1	yes
The following statement is in German langauge and a native german speaker annotated this as hateful: Mein Hirn an Werktagen https://t.co/PnhSPCYfLx. Is the given statement hateful?	0	yes.
The following statement is in German langauge and a native german speaker annotated this as hateful: RT @fabian_schmid: Was? Kurz meldet sich ECHT zu Wort, weil die SPÖ nicht wollte, dass auf ihrer eigenen Veranstaltung der Gabalier gespiel…. Is the given statement hateful?	0	yes
The following statement is in German langauge and a native german speaker annotated this as hateful: @SandraLustig13 Mannomann, dumme, verwöhnte, gepamperte Kinder im Furor der moralisch-ethischen Überhöhung. Sie wer… https://t.co/l7JcrRgEzt. Is the given statement hateful?	1	yes.
The following statement is in German langauge and a native german speaker annotated this as hateful: RT @KeineAFD2017: Das sind Nazis und wenn wir die alle hinter Gittern haben, wird es lange dauern bis wir den Hass, die Hetze und die Lügen…. Is the given statement hateful?	0	yes
The following statement is in German langauge and a native german speaker annotated this as hateful: @jusederjude kinder sind halt dumm wie scheiße schade. Is the given statement hateful?	1	yes
The following statement is in German langauge and a native german speaker annotated this as hateful: Wie viele dumme Menschen es doch gibt... Und sie merken noch nicht mal, wie dämlich sie sind. Sie denken total besc… https://t.co/evnrJebcdu. Is the given statement hateful?	1	yes.
The following statement is in German langauge and a native german speaker annotated this as hateful: RT @ZDFheute: Erster Deutschland-Besuch: Pompeo trifft Merkel und Maas https://t.co/yA3eZwN32J. Is the given statement hateful?	0	no
The following statement is in German langauge and a native german speaker annotated this as hateful: RT @deutsch365: 🇮🇹🇮🇹🇮🇹‼️ @MatteoSalviniMI: "Wer hat Europa betrogen? Die Merkels, die Macrons und die Junckers! Sie haben dieses Europa im…. Is the given statement hateful?	1	yes
The following statement is in German langauge and a native german speaker annotated this as hateful: @FunkhausZorra @PolitikStandard Hat Hitler hat auch gesagt.. Is the given statement hateful?	0	yes.
The following statement is in German langauge and a native german speaker annotated this as hateful: @ZDFheute Oder alle Asylanten ausweisen. .. Is the given statement hateful?	1	yes
The following statement is in German langauge and a native german speaker annotated this as hateful: https://t.co/ykxdOebkNQ Mir kommt einfach nur das Kotzen!. Is the given statement hateful?	0	yes.
The following statement is in German langauge and a native german speaker annotated this as hateful: RT @neomagazin: Deutsche Carpool Karaoke #DoTheyKnowItsEurope https://t.co/JENTkGq11j. Is the given statement hateful?	0	no
The following statement is in German langauge and a native german speaker annotated this as hateful: @Traderbulls @welt Korsett für den Kopf.. Is the given statement hateful?	0	yes
The following statement is in German langauge and a native german speaker annotated this as hateful: @LPSebo haahahaha cüüüüüs das ist einfach mehr als dokkan damals bei Phy SV. Is the given statement hateful?	0	no
The following statement is in German langauge and a native german speaker annotated this as hateful: @AliCologne @gamergateblogde Islam ist ein Krebsgeschwür, das sich mithilfe der linken Politiker in Deutschland ausbreitet.. Is the given statement hateful?	1	yes
The following statement is in German langauge and a native german speaker annotated this as hateful: @CDU Könnt Ihr es nicht mal lassen die Bürger für dumm zu verkaufen! Wer euch noch wählt oder ein Wort glaubt, dem… https://t.co/OptKkUfMnu. Is the given statement hateful?	1	yes
The following statement is in German langauge and a native german speaker annotated this as hateful: @FakeBlondinchen @Spiegel Scheiss deutsche Politiker! Mehr gibt es wohl nicht dazu zu sagen!. Is the given statement hateful?	1	yes.
The following statement is in German langauge and a native german speaker annotated this as hateful: RT @Heiko31086906: Deutschland und die Deutschen sind scheiße, alles scheiße, alles Nazis. Warum sei ihr dann in diesem unser Land! Richte…. Is the given statement hateful?	1	yes
The following statement is in German langauge and a native german speaker annotated this as hateful: @HolgerEwald1 @China_Welt_News Seh ich genauso. Doch nicht nur Kühnert, von den Grünen ist kein einziger koscher!. Is the given statement hateful?	0	yes
The following statement is in German langauge and a native german speaker annotated this as hateful: RT @pinkcrazypony: Eine #Islamisierung findet NICHT statt ? Fakten im #ZDF ? #Islamisierung ist schon weitaus fortgeschrittener als WIR u…. Is the given statement hateful?	0	yes
The following statement is in German langauge and a native german speaker annotated this as hateful: RT @narrhallamarsch: scheiß auf Spargel, Erbeeren for President!. Is the given statement hateful?	0	yes.
The following statement is in German langauge and a native german speaker annotated this as hateful: RT @Knuddelbacke: Die Fröbelschule Aschaffenburg integriert sich in den Islam https://t.co/SZvXH26tb4. Is the given statement hateful?	0	yes
The following statement is in German langauge and a native german speaker annotated this as hateful: RT @AufgewachteWelt: Ich eruiere: Merkel gibt CNN(Clinton NextNews) ein Interview. Merkel erhält von Obamas Harvad-Universität eine Ehrend…. Is the given statement hateful?	0	yes
The following statement is in German langauge and a native german speaker annotated this as hateful: RT @UnDEANiable: Steve Hofmeyr &gt; Kaizer Chiefs. Is the given statement hateful?	0	yes
The following statement is in German langauge and a native german speaker annotated this as hateful: Jetzt nehmen uns die Ausländer schon die Parkplätze weg. Vor allem die Flüchtlinge, die alle mit ihren Autos kommen… https://t.co/5X2Ji4pcS9. Is the given statement hateful?	0	yes.
The following statement is in German langauge and a native german speaker annotated this as hateful: @kvinna_hopp @SeverinBrandis Invasoren sind das😂. Is the given statement hateful?	0	yes.
The following statement is in German langauge and a native german speaker annotated this as hateful: Neulich im Konrad Andenauer Haus: "Fuck Fipsi, wir haben uns halt voll selbst zerstört." "Stimmt Paule, aber schei… https://t.co/eFQum1xkZt. Is the given statement hateful?	0	yes.
The following statement is in German langauge and a native german speaker annotated this as hateful: @tagesschau Eine widerliche Verlogenheit des Herren Herrmann! Man kann zwar #Kippa tragen, aber wenn die Kameras au… https://t.co/5lT4p3aUnB. Is the given statement hateful?	0	yes.
The following statement is in German langauge and a native german speaker annotated this as hateful: Deutsche plata o plomo https://t.co/n6hNyUjYOR. Is the given statement hateful?	0	yes
The following statement is in German langauge and a native german speaker annotated this as hateful: @StBrandner Die GRÜNEN outen sich auch als Sprachrohr der Pädophilen und Kinderschänder und fordern nach einem Kind… https://t.co/tmi06q2zyL. Is the given statement hateful?	1	yes.
The following statement is in German langauge and a native german speaker annotated this as hateful: @SatireUNfreiesD So ist es, der Islam ist keine Religion des Friedens! https://t.co/NSyjYNJ477. Is the given statement hateful?	1	yes.
The following statement is in German langauge and a native german speaker annotated this as hateful: @BilBuHa_iR Warum färbt Frau Roht sich nicht schwarz und trägt ein Kopftuch???. Is the given statement hateful?	0	yes.
The following statement is in German langauge and a native german speaker annotated this as hateful: Was war ich dumm, Was war ich stur. Ging sie fort, die Frau fürs Leben, O‘ was würd ich für sie geben.. Is the given statement hateful?	0	no.
The following statement is in German langauge and a native german speaker annotated this as hateful: RT @MarleneSchfer1: In der Hölle sorgen die Linken für die Ordnung, vegane Grüne für die Küche und Merkel für den Humor. Der Satan selbst i…. Is the given statement hateful?	1	yes
The following statement is in German langauge and a native german speaker annotated this as hateful: RT @SvenIsHell: Was machen die Leute, die DIE LINKE, GRÜNE und SPD gewählt haben, eigentlich an Pegida-Montagen? #nurindresden #nopegidaDD…. Is the given statement hateful?	0	yes
The following statement is in German langauge and a native german speaker annotated this as hateful: die Deutschen - dumm, dümmer, am dümmsten .... Is the given statement hateful?	1	yes.
The following statement is in German langauge and a native german speaker annotated this as hateful: Barkley &gt; Xavi https://t.co/SAncB0kT6F. Is the given statement hateful?	0	no
The following statement is in German langauge and a native german speaker annotated this as hateful: @tagesschau Fehlt eigentlich noch folgendes Zitat von BMW-Chef Del… äh Krüger: „An Elon Musks Stelle würde ich den… https://t.co/FQTz8qWzlL. Is the given statement hateful?	0	yes
The following statement is in German langauge and a native german speaker annotated this as hateful: @Hahn41729786 Arbeitslager für dieses aggressive Pack. Is the given statement hateful?	1	yes.
The following statement is in German langauge and a native german speaker annotated this as hateful: @Traijan_ @misterlemonade_ @maudado @DeutschlandVolt Kann man denn nicht einfach die Grünen wählen? Die sind immerh… https://t.co/KlqeIcpY8P. Is the given statement hateful?	0	no
The following statement is in German langauge and a native german speaker annotated this as hateful: RT @Thorsten0711: Senioren überfallen und misshandeln. Dreckiger Abschaum. #AktenzeichenXY. Is the given statement hateful?	1	yes.
The following statement is in German langauge and a native german speaker annotated this as hateful: RT @helllud123: @tagesschau Die Grünen holzen uralte Wälder und damit hunderttausende Bäume ab - für "Klimaschutz"! Die Wähler der Grünen…. Is the given statement hateful?	0	yes
The following statement is in German langauge and a native german speaker annotated this as hateful: RT @gifev: Viel los in der gif Kompetenzgruppe Wohnen! Aktuelle Projektgruppen: Neue Wohnformen, Mikrolagen-Ranking für deutsche Großstädte…. Is the given statement hateful?	0	no
The following statement is in German langauge and a native german speaker annotated this as hateful: RT @GeraldGrosz: Frau Merkel, Frau Barley! In Wahrheit vollziehen Sie mit Ihrem polygamistischen Einbürgerungsgesetz nun auch rechtlich jen…. Is the given statement hateful?	0	yes
The following statement is in German langauge and a native german speaker annotated this as hateful: RT @asapfuro: Fler zeigt wie man flowt einfach Gänsehaut https://t.co/HOFEbTZgJm. Is the given statement hateful?	0	no
The following statement is in German langauge and a native german speaker annotated this as hateful: @Tentakelkaiser So sind die Kinder halt ... Man kann in Kinder nichts hineinprügeln, aber vieles herausstreicheln.. Is the given statement hateful?	0	no
The following statement is in German langauge and a native german speaker annotated this as hateful: @BILD Sie meisten Grünen sind Alkoholiker.. Is the given statement hateful?	1	yes
The following statement is in German langauge and a native german speaker annotated this as hateful: RT @JacobyJost: @MS_Berlin Auf dem sinkenden Dampfer der Linken sind die weniger werdenden Wähler von der roten auf die grüne Seite gewechs…. Is the given statement hateful?	0	yes
The following statement is in German langauge and a native german speaker annotated this as hateful: RT @SirSchnee: #Buntland ist bald abgebrannt? 🤔 Beharrlich weigerte sich der mit einer Deutschen verheiratete Tunesier, seine Mütze abzune…. Is the given statement hateful?	0	yes
The following statement is in German langauge and a native german speaker annotated this as hateful: @wutuniverse Kuss zurück. Is the given statement hateful?	0	no.
The following statement is in German langauge and a native german speaker annotated this as hateful: Ahahahaaaa 😂 Zweitstärkste dürfen sie werden die Grünen, dann ist "die Welt grün in der wir alle leben wollen". Abe… https://t.co/IS6Vkl6AxY. Is the given statement hateful?	0	yes.
The following statement is in German langauge and a native german speaker annotated this as hateful: @WELTnews Die Merkel soll "Flinten-Uschi" rausschmeissen, dann wird alles wieder vernünftig geregelt!!. Is the given statement hateful?	0	yes.
The following statement is in German langauge and a native german speaker annotated this as hateful: @edgyluwuca Wenn du die Umfrage machen würdest alle würden dich für dumm verkaufen, dass du überhaupt fragst. Is the given statement hateful?	0	yes
The following statement is in German langauge and a native german speaker annotated this as hateful: RT @aufklaerer2017: Wie immer! Kaum holen idiologisch verblendete Gutmenschen @Die_Gruenen und #Linke den Ali ans Mikrofon um sich zum The…. Is the given statement hateful?	1	yes
The following statement is in German langauge and a native german speaker annotated this as hateful: RT @KramerGartenbau: Eine kleine grüne Wand um die Natur zurück zu bringen #livingwall #aufdassdiestädtegrünerwerden https://t.co/1piU7fnHjx. Is the given statement hateful?	0	no.
The following statement is in German langauge and a native german speaker annotated this as hateful: @Anabell2301 Willkommen zurück!. Is the given statement hateful?	0	no.
The following statement is in German langauge and a native german speaker annotated this as hateful: Merkel schickt aus Hamburger Hafen Botschaft an Trump https://t.co/cska3LPkOO https://t.co/RevM9wSw9M. Is the given statement hateful?	0	no.
The following statement is in German langauge and a native german speaker annotated this as hateful: gabriel gei https://t.co/ZCJJrLMOPC. Is the given statement hateful?	0	yes.
The following statement is in German langauge and a native german speaker annotated this as hateful: Ich muss die Menschheit beschützen = sonst ist alles im Arsch‼️‼️‼️‼️‼️ https://t.co/6rgmen2byg. Is the given statement hateful?	0	no.
The following statement is in German langauge and a native german speaker annotated this as hateful: @Hartes_Geld #Nazis waren schon immer #Linke, halt miese #Sozialisten - wie die #Antifanten der #kriminellen #Antifa.. Is the given statement hateful?	1	yes
The following statement is in German langauge and a native german speaker annotated this as hateful: RT @EnricoTokarEU: Mich ekelt dieses Nazispack einfach nur an. Es ist eine Schande, dass diese Faschisten in unserem Land wieder derartig a…. Is the given statement hateful?	1	yes
The following statement is in German langauge and a native german speaker annotated this as hateful: An alle Frauen der Welt. https://t.co/5a3bJEkP9Y. Is the given statement hateful?	0	yes.
The following statement is in German langauge and a native german speaker annotated this as hateful: Ich werde es nicht wegschmeissen das ist das einzigste noch was mir von meinem geliebten Baka Idioten Exfreund übri… https://t.co/QgCtly0ZNj. Is the given statement hateful?	0	yes.
The following statement is in German langauge and a native german speaker annotated this as hateful: RT @A_Hildering: 🥁Merkels "Kultur" wird ganz Europa in das Verderben ziehen ‼️🤔 Rot Grüne Infiltration zerstört Demokratie u. Freiheit ‼️…. Is the given statement hateful?	1	yes
The following statement is in German langauge and a native german speaker annotated this as hateful: Wenn Politiker Politik für den Arsch machen https://t.co/ZJ9Z9Rnopw https://t.co/EJAPKYaAtl. Is the given statement hateful?	1	yes
The following statement is in German langauge and a native german speaker annotated this as hateful: dragonball &gt; alle anderen dragonballz. Is the given statement hateful?	0	no
The following statement is in German langauge and a native german speaker annotated this as hateful: RT @Manuel_k_b: Zeigt mir einen doktortitelklauenden, beim Lügen erwischten, eidbrechenden Politiker in Deutschland, der sich hinstellt und…. Is the given statement hateful?	0	yes
The following statement is in German langauge and a native german speaker annotated this as hateful: RT @DanielRSchmidt: Leben Sie wohl, Judith Kerr! "Als Hitler das rosa Kaninchen stahl" war in meinem Leben meine erste Konfrontation mit Au…. Is the given statement hateful?	0	no
The following statement is in German langauge and a native german speaker annotated this as hateful: RT @DfaCheck: Unfassbar! Weg mit den #Nazis! #NazisRaus https://t.co/J90Njwu2AE. Is the given statement hateful?	1	yes.
The following statement is in German langauge and a native german speaker annotated this as hateful: RT @nicolangecdu: Merkel gibt für Weber alles #26MaiCDU https://t.co/QmZlS4Slgs. Is the given statement hateful?	0	no
The following statement is in German langauge and a native german speaker annotated this as hateful: RT @SirSchnee: Hört das niemals auf? Bei dem Volksfest Schlossgrabenhock in #Ehrenkirchen-Kirchhofen hat es einen Messerangriff durch eine…. Is the given statement hateful?	0	yes
The following statement is in German langauge and a native german speaker annotated this as hateful: die arroganz der leute aus den westlichen bundesländern ist so ekelhaft und abstoßend, ich könnt kotzen wie kann m… https://t.co/uXdFuejOZB. Is the given statement hateful?	1	yes
The following statement is in German langauge and a native german speaker annotated this as hateful: @dwarfplanet Immer der, der dumm fragt.. Is the given statement hateful?	0	yes
The following statement is in German langauge and a native german speaker annotated this as hateful: RT @helllud123: Der Linksfaschismus marschiert: Brandgefährliche Linksextremisten stilisieren sich dummdreist als Opfer und linke Gesinnung…. Is the given statement hateful?	0	yes
The following statement is in German langauge and a native german speaker annotated this as hateful: Die @CDU_CSU_EP eine Ansammlung von Vollidioten oder anders gesagt die 5. Kolonne Moskaus/AfD, nur zu dumm es zu me… https://t.co/mAd2ovpRuk. Is the given statement hateful?	1	yes
The following statement is in German langauge and a native german speaker annotated this as hateful: @CASPERxOFFICIAL ist ab jetzt nicht nur Emorapper, sondern linksextremer Emorapper ☝️ #WirSindMehr. Is the given statement hateful?	0	yes.
The following statement is in German langauge and a native german speaker annotated this as hateful: RT @_MONE_1207: @Horst_Hutzel @lehmanowsky_ Bei manchen Wahlplakaten ist die Scheisse schon drauf #fckafd. Is the given statement hateful?	0	yes
The following statement is in German langauge and a native german speaker annotated this as hateful: @MRSL0NELYY Du bist einfach wunderschön 🥺. Is the given statement hateful?	0	no.
The following statement is in German langauge and a native german speaker annotated this as hateful: @zeitonline was haben die beiden Kopalken nur im Kopf?. Is the given statement hateful?	0	yes.
The following statement is in German langauge and a native german speaker annotated this as hateful: Ich hasse es, wenn sich erwachsene Frauen wie Kleinkinder aufführen. #dasperfektedinner. Is the given statement hateful?	0	yes
The following statement is in German langauge and a native german speaker annotated this as hateful: @6ponge Bist du dumm. Is the given statement hateful?	0	yes.
The following statement is in German langauge and a native german speaker annotated this as hateful: Und dann fährt man schon zusammen zum Arbeitsplatz. RTL verbindet Idioten.. Is the given statement hateful?	0	yes
The following statement is in German langauge and a native german speaker annotated this as hateful: RT @fragdenstaat: UPDATE #Zensurheberrecht: Das BfR schickt ab sofort Zugangscodes zum Glyphosat-Gutachten allen 40.000 Antragstellern zu.…. Is the given statement hateful?	0	no
The following statement is in German langauge and a native german speaker annotated this as hateful: @KYSOLTIX Nichts ich bin einfach zu 200IQ. Is the given statement hateful?	0	no
The following statement is in German langauge and a native german speaker annotated this as hateful: RT @deutsch365: 💥💥💥 In Afrika wird der Islam wie vor 1.400 Jahren mit Gewalt verbreitet. Die weltweite Expansion des Islam ist scheinbar un…. Is the given statement hateful?	0	yes.
The following statement is in German langauge and a native german speaker annotated this as hateful: RT @rbarris: @ReutersPolitics The Deutsche Abides. Is the given statement hateful?	0	yes
The following statement is in German langauge and a native german speaker annotated this as hateful: RT @DingenskirchenJ: #Fanpost ... wenn Dir das deutsche Nazi-Pack nicht mehr reicht, dann läd man sich halt noch ein paar Erdogan-Trolle ei…. Is the given statement hateful?	1	yes.
The following statement is in German langauge and a native german speaker annotated this as hateful: Nagelsmann contra Mateta: "Einfach respektlos" https://t.co/QlN9mDIPur #mainz05 #fsvmainz05 #bundesliga. Is the given statement hateful?	0	no
The following statement is in German langauge and a native german speaker annotated this as hateful: Stoppt den Islam. Is the given statement hateful?	1	yes.
The following statement is in German langauge and a native german speaker annotated this as hateful: @partykanak @lieferando Einfach Schweine Haxe. Is the given statement hateful?	0	yes
The following statement is in German langauge and a native german speaker annotated this as hateful: @Jan69161843 @ntvde @camanpour Dass ich nicht lache. Merkel war bestimmt auch verantwortlich, dass es z.B. Berlusco… https://t.co/wBFuH8ReTO. Is the given statement hateful?	0	yes
The following statement is in German langauge and a native german speaker annotated this as hateful: @mac_and_i @heiseonline die haben halt wie Samsung gemerkt das genug Idioten deren Phones auch alle 12 Monate kaufe… https://t.co/gKx1SQwdKn. Is the given statement hateful?	0	no.
The following statement is in German langauge and a native german speaker annotated this as hateful: RT @MalteKaufmann: Es ist einfach so unglaublich, wie die Medien einer grünen Regierung entgegengeifern und den "Kanzler #Habeck" herbeisch…. Is the given statement hateful?	0	yes.
The following statement is in German langauge and a native german speaker annotated this as hateful: RT @SirSchnee: Die grüne #Khmer möchte #Klimaleugner am liebsten ... Es gibt halt keine frei Meinung bei den #Klimafaschisten. #NoGrüne h…. Is the given statement hateful?	1	yes
The following statement is in German langauge and a native german speaker annotated this as hateful: RT @sasiiii000: Ich musste es einfach tun ahhh 😩wollte schon immer mal ein @xPandorya Fanart machen 💙 das Original ist bei @Eosandy zu sehe…. Is the given statement hateful?	0	no
The following statement is in German langauge and a native german speaker annotated this as hateful: @bas_ton Das ist jetzt einfach nur gemein.. Is the given statement hateful?	0	yes.
The following statement is in German langauge and a native german speaker annotated this as hateful: RT @jouwatch: Gewaltbereitschaft bei Linken immer noch hoch https://t.co/2JRVsCCOtm https://t.co/oMMthQA4Wf. Is the given statement hateful?	0	no
The following statement is in German langauge and a native german speaker annotated this as hateful: @Edelnickel Früher als Kinderlose hätt ich den Leuten den Arsch aufgerissen für so eine Absage. Wenn jetzt jemand e… https://t.co/HImKbKxYCH. Is the given statement hateful?	0	yes.
The following statement is in German langauge and a native german speaker annotated this as hateful: @SawsanChebli Das Kopftuch ist zu einem Symbol, einem Synonym für eine rückwärtsgewandte Religion/Ideologie geworde… https://t.co/dYDKzTjihc. Is the given statement hateful?	1	yes
The following statement is in German langauge and a native german speaker annotated this as hateful: @dieliebeanna Willkommen zurück!. Is the given statement hateful?	0	no
The following statement is in German langauge and a native german speaker annotated this as hateful: @Frank_SiriuS @CmdKrieger Arsch 😡. Is the given statement hateful?	0	yes.
The following statement is in German langauge and a native german speaker annotated this as hateful: RT @derFuetsch: Weil man als dumme Frau nichts zu sagen hat? https://t.co/GOhrYy3kfL. Is the given statement hateful?	1	yes
The following statement is in German langauge and a native german speaker annotated this as hateful: RT @SirSchnee: Das größte Kreditinstitut in der #EU, die #DeutscheBank, könnte der Grund für eine neue globale #Finanzkrise werden. Der #I…. Is the given statement hateful?	0	no
The following statement is in German langauge and a native german speaker annotated this as hateful: RT @AndreasStraub: ZDF Heute: Merkel in Mali, Hochburg der Menschenschmuggler. Sie überwacht persönlich dass Bevölkerungsaustausch der Eur…. Is the given statement hateful?	0	yes
The following statement is in German langauge and a native german speaker annotated this as hateful: RT @ExGruene: @tagesschau Hat sich die Tagesschau schon von ihrer #Özil Berichterstattung distanziert? War der Schnappschuss mit #Erdogan n…. Is the given statement hateful?	0	yes
The following statement is in German langauge and a native german speaker annotated this as hateful: @faznet Nun die USA machen doch nur was Merkel selbst fordert. https://t.co/BRS9z1Yuz5. Is the given statement hateful?	0	no
The following statement is in German langauge and a native german speaker annotated this as hateful: @derpsichologe @Burhan____ diggi du denkst mehr an fasten als alle moslems hier zusammen was los. Is the given statement hateful?	0	yes
The following statement is in German langauge and a native german speaker annotated this as hateful: @Karsten71 Das typische Bild eines Linken!!! Lallend mit der Bierflasche in der Hand,aber Hauptsache Antifa und gegen "Nazis"... 😂😂😂. Is the given statement hateful?	1	yes.
The following statement is in German langauge and a native german speaker annotated this as hateful: RT @maternus: Das werfe ich Frau Merkel und ihrer Claque am meisten vor: daß sie unser Land für kriminelle, fanatische und unverschämte Mig…. Is the given statement hateful?	1	yes.
The following statement is in German langauge and a native german speaker annotated this as hateful: @tony_pip Es kommt immer wieder vor. Aber die Konnotation in Medien war "Nazi-Treffen" - das war den Linken Hetzern… https://t.co/LoqG2cWKzB. Is the given statement hateful?	1	yes.
The following statement is in German langauge and a native german speaker annotated this as hateful: RT @krippmarie: Kanzlerin #Merkel sagt Niger Hilfe im Kampf gegen Instabilität zu Sie verteilt nach dem Gießkannenprinzip deutsche Steuerg…. Is the given statement hateful?	0	yes
The following statement is in German langauge and a native german speaker annotated this as hateful: @docboone71 Auch wenn seine Idee vom „grünen Stadion“ damals nicht umsetzbar war, hab ich eher die nicht mehr zu ki… https://t.co/7QfpG9f5P3. Is the given statement hateful?	0	no
The following statement is in German langauge and a native german speaker annotated this as hateful: RT @MWinteron: So, wie die Merkel - Regierung, incl. des größten Teils der sog. Opposition, Deutschland in die Scheiße geritten hat, müßte…. Is the given statement hateful?	1	yes
The following statement is in German langauge and a native german speaker annotated this as hateful: Wenn man unterwegs ist, kommt es einem vor als gäbe es nur noch Idioten.. Is the given statement hateful?	1	no
The following statement is in German langauge and a native german speaker annotated this as hateful: Menschen die einem an der Kasse am Arsch kleben. Dadurch wird’s nicht schneller. Und ich absichtlich langsam 🤓. Is the given statement hateful?	0	yes
The following statement is in German langauge and a native german speaker annotated this as hateful: @Pabgee Ist das nicht einfach 113?. Is the given statement hateful?	0	no
The following statement is in German langauge and a native german speaker annotated this as hateful: Wie unterhalte ich mich mit Freundinnen in der Öffentlichkeit über Sex, ohne dass uns all die dummen Kerle in Hörwe… https://t.co/0ILkCeVfRX. Is the given statement hateful?	0	yes.
The following statement is in German langauge and a native german speaker annotated this as hateful: Kennst du schon „Mein Kampf - Adolf Hitler - Volk und Rasse“ von User 167067272 auf #SoundCloud? #np https://t.co/UgXSJkfael. Is the given statement hateful?	0	yes
The following statement is in German langauge and a native german speaker annotated this as hateful: @dieserOskar Ist einfach so. Sorry das müsste raus. Ich könnte es mir nicht unterdrücken. Ich würde einfach von meinem Gehirn gezwungen. Is the given statement hateful?	0	yes
The following statement is in German langauge and a native german speaker annotated this as hateful: Die ganzen infantilen jungen Trullas haben die Grünen gewählt. Dass sind alles so kleine Analena's, Ska's und Kats… https://t.co/FldCQaEGGG. Is the given statement hateful?	1	yes
The following statement is in German langauge and a native german speaker annotated this as hateful: RT @keeprespect79: @tagesschau Das zeigt: naiv wählt grün, wenn sie älter werden sind die schlauer!. Is the given statement hateful?	0	yes
The following statement is in German langauge and a native german speaker annotated this as hateful: @Ballou381 @SawsanChebli Was heißt sauer, mich kotzen solch dumme Menschen einfach an die auch noch von meinen steu… https://t.co/S2aHJl7hUO. Is the given statement hateful?	1	yes.
The following statement is in German langauge and a native german speaker annotated this as hateful: @JusosDresden ich habe es gegoogelt....... wie dumm kann man sein..... Dumm, Dümmer , Nazi. Is the given statement hateful?	1	yes.
The following statement is in German langauge and a native german speaker annotated this as hateful: @benedetusmc Mich freuts für Kovac. Nach der Scheisse die Rollex-Kalle und Steuer-Uli abgezogen haben.. Is the given statement hateful?	0	yes
The following statement is in German langauge and a native german speaker annotated this as hateful: RT @gerhardschwar11: @Virgen48 @DerWanderer4 Nazis sind keine Samba-Truppe..!👍. Is the given statement hateful?	0	yes.
The following statement is in German langauge and a native german speaker annotated this as hateful: was verkauft ein buchladen überhaupt so eine scheiße und warum diese ganzen räucherstäbchen. Is the given statement hateful?	0	yes
The following statement is in German langauge and a native german speaker annotated this as hateful: RT @PatrickGensing: Das Profil von "Dora Bromberger" ist nach Sperrung mittlerweile als "Ex Grüne" unterwegs, Schwesteraccount "Emma Richte…. Is the given statement hateful?	0	no
The following statement is in German langauge and a native german speaker annotated this as hateful: @Hallo_Rollo Es gibt nicht DAS System, das alle(!) zufrieden stimmt. Is the given statement hateful?	0	no
The following statement is in German langauge and a native german speaker annotated this as hateful: RT @ddrmuseum: Ab 1977 gab es in der DDR die Pocketkamera „Pentacon K16“. Sie war ideal für das Negativformat 13x17mm. #MuseumWeek #PhotoMW…. Is the given statement hateful?	0	no
The following statement is in German langauge and a native german speaker annotated this as hateful: @SchmusedogAmos @ItCollie Ich auch! Kotzen ist zum kotzen!. Is the given statement hateful?	0	yes.
The following statement is in German langauge and a native german speaker annotated this as hateful: @OrenIShiKiddo @profraika und ich sage Ihm er wird sich Irren. Warum? Weil sich nur wenige deutsche Frauen auf Nege… https://t.co/lFHvK5eJk2. Is the given statement hateful?	1	yes.
The following statement is in German langauge and a native german speaker annotated this as hateful: @DennisKoch87 @tagesthemen @tagesschau Jezus ist auferstanden!! 😂 Hört auf ihn.. Is the given statement hateful?	0	no
The following statement is in German langauge and a native german speaker annotated this as hateful: 03.05.2019|btc-echo: Krypto-Tauwetter? Bitcoin-Börse Bakkt deckt sich mit Krypto-Assets ein -&gt;… https://t.co/vHeRav3S0y. Is the given statement hateful?	0	no
The following statement is in German langauge and a native german speaker annotated this as hateful: RT @bimbas_world: Warum fragt denn die Bild so blöd, warum Merkel schweigt zum Wahl-Desaster? Die Chefin der CDU ist AKK, nicht Merkel.. Is the given statement hateful?	0	no
The following statement is in German langauge and a native german speaker annotated this as hateful: @morgenpost Und nicht alle Grünen brauchen Freigang.. Is the given statement hateful?	0	no
The following statement is in German langauge and a native german speaker annotated this as hateful: RT @VzVhdS_deutsch: "Bin Nationalromantiker" – das "I didn't inhale" der Rechtsextremen und Nazis.. Is the given statement hateful?	0	yes.
The following statement is in German langauge and a native german speaker annotated this as hateful: RT @ulrichham: @Karl_Lauterbach Wir hatten schon mal rot grün .Abgezockt habt ihr uns .Belogen und betrogen .H4 , Altersarmut ,Leiharbeit,…. Is the given statement hateful?	1	yes
The following statement is in German langauge and a native german speaker annotated this as hateful: RT @alextv: Gibt es eigentlich Puffs für Frauen? 🤔. Is the given statement hateful?	0	no.
The following statement is in German langauge and a native german speaker annotated this as hateful: RT @tifftxxxxf: Fun Facts zur Europawahl: Alle Politiker sind behindert. Is the given statement hateful?	1	yes
The following statement is in German langauge and a native german speaker annotated this as hateful: @cem_oezdemir @ConstSchreiber Grüne Ökonazis raus. Is the given statement hateful?	1	yes.
The following statement is in German langauge and a native german speaker annotated this as hateful: RT @ZDFheute: Wer wählte die Grünen bei der #Europawahl2019? https://t.co/bDmYsTVuTf. Is the given statement hateful?	0	no
The following statement is in German langauge and a native german speaker annotated this as hateful: @SapereAudeDE @LanaS08819497 Vor allem motiviert, sich in die soziale Hängematte zu legen, die der dumme deutsche S… https://t.co/uRXsH2CGXS. Is the given statement hateful?	1	yes.
The following statement is in German langauge and a native german speaker annotated this as hateful: @Karl_Lauterbach Falsch, die Nationalsozialisten waren Idealisten. Unter Hitler sind viele SPDler zu den Nazis über… https://t.co/3QpBrFakuU. Is the given statement hateful?	0	yes.
The following statement is in German langauge and a native german speaker annotated this as hateful: Es ist einfach schon wieder alles eskaliert. Ich hab langsam echt kein Bock mehr.. Is the given statement hateful?	0	no
The following statement is in German langauge and a native german speaker annotated this as hateful: @verblasste Merle ich sehe einfach SO EDGY aus. Is the given statement hateful?	0	no
The following statement is in German langauge and a native german speaker annotated this as hateful: RT @Priiizzyy: *während klausur* ich: ok erste aufgab.. gehirn *denkt an ein song oder beat* ich: junge du hurensohn *konzentriere mich*…. Is the given statement hateful?	0	yes.
The following statement is in German langauge and a native german speaker annotated this as hateful: Eine Frau ist ein Gegenstand und das teilt man gerne, Hose auf, Frauen kauf, komm und zeig dein Arsch, du geile Sau. Is the given statement hateful?	1	yes
The following statement is in German langauge and a native german speaker annotated this as hateful: RT @alfunterwegs70: Sie belügen euch ganz öffentlich und der dumme Deutsche will es einfach nicht kapieren https://t.co/TeaHVQqZZ2. Is the given statement hateful?	1	yes.
The following statement is in German langauge and a native german speaker annotated this as hateful: 6. ich habe eine ungesunde obsession mit miley cyrus und das halt schon seit der grundschule. Is the given statement hateful?	0	no
The following statement is in German langauge and a native german speaker annotated this as hateful: Okay,kurzes Update: Aus den Gomd-Tresoren 3x WM35 bekommen!^^ (Rey,Gable,Sheamus-Alle 3 Single) TBG Pack: Ciampa(… https://t.co/eKAAr0aH7b. Is the given statement hateful?	0	no.
The following statement is in German langauge and a native german speaker annotated this as hateful: @bzberlin Super, wie er die grenzenlose Dummheit der Roten schön verbreitet. Der ist so hohl, der passt eigentlich eher zu Grün.. Is the given statement hateful?	1	yes
The following statement is in German langauge and a native german speaker annotated this as hateful: RT @Atomreisfleisch: @jacky_lope Und man hört diese ganzen Elektro-Dinger nicht. Ich stelle mich schon heute auf das Geheule ein, wenn Leut…. Is the given statement hateful?	0	yes
The following statement is in German langauge and a native german speaker annotated this as hateful: RT @Gothano: @RegSprecher @Harvard Mitreißende Rede zum Aufbruch,die in totalem Widerspruch zu Merkel's Handeln als Spitzenpolitikerin steh…. Is the given statement hateful?	0	yes
The following statement is in German langauge and a native german speaker annotated this as hateful: @ChristianHelms Dumm hat seine Aufgabe tatsächlich noch erledigt bekommen. Aber ich habe die Dummheit von Dümmer mal wieder unterschätzt.. Is the given statement hateful?	0	yes.
The following statement is in German langauge and a native german speaker annotated this as hateful: @Garfieldine @SexismObserver @zeitonline @SPIEGELONLINE Hop Hop ab in die Küche. Is the given statement hateful?	0	yes.
The following statement is in German langauge and a native german speaker annotated this as hateful: Türken sliden bei ihrer Cousine mit „Kennt man sich? 😏💦“ in die DMs. Is the given statement hateful?	0	yes
The following statement is in German langauge and a native german speaker annotated this as hateful: @yung_arkan2 Also stimmt die Lieferzeit? Kann dann direkt wieder stornieren bin ab 9.6 weg. Is the given statement hateful?	0	no
The following statement is in German langauge and a native german speaker annotated this as hateful: Als satiriker war er mal interessant. Als politiker wirkt er nur noch dumm. Schuster bleib bei deinen leisten. Furc… https://t.co/hVjZcw0qN1. Is the given statement hateful?	0	yes
The following statement is in German langauge and a native german speaker annotated this as hateful: was erzählt die „presse“ denn da bitte für eine dumme scheisse? 🙄 welcher chefredakteur holt sich darauf einen run… https://t.co/pSsl4bs3gH. Is the given statement hateful?	1	yes
The following statement is in German langauge and a native german speaker annotated this as hateful: @Die_Gruenen Jetzt müssten die Grünen Politiker nurnoch zu ihren ursprünglichen Grundwerten zurückkehren, dann wäre… https://t.co/cEB3luyLlq. Is the given statement hateful?	0	no
The following statement is in German langauge and a native german speaker annotated this as hateful: @lijusolid Die Nazis meinten auch, sich zu Herren über das Leben anderer aufschwingen zu können.. Is the given statement hateful?	0	yes.
The following statement is in German langauge and a native german speaker annotated this as hateful: Linke Idioten kann man nur noch blocken. #Vatertag https://t.co/ZMjScHXMNT. Is the given statement hateful?	0	yes
The following statement is in German langauge and a native german speaker annotated this as hateful: PETITION IST EINGESTÄNDNIS,DAß MOSLEMS ZU DUMM FÜR MATHE SIND !!! Kopftuch-Muslima startet Petition gegen Mathe-Ab… https://t.co/s7AjMsUS1r. Is the given statement hateful?	1	yes
The following statement is in German langauge and a native german speaker annotated this as hateful: RT @pinkcrazypony: Der Reporter redet von der Berliner Kriminalitätsstatistik und der junge Mann redet vom Islam. Besser könnte man einen…. Is the given statement hateful?	0	yes
The following statement is in German langauge and a native german speaker annotated this as hateful: @Ma_Heller @welt Grüne und Feinstaub sauber. Is the given statement hateful?	0	yes.
The following statement is in German langauge and a native german speaker annotated this as hateful: @ZDF Deutschen sind Schädlingen. Is the given statement hateful?	1	yes
The following statement is in German langauge and a native german speaker annotated this as hateful: Dinge die ich nach meinem Studium nie wieder machen werde: Schaltpläne in LaTeX zeichnen. Was ein Scheiß.. Is the given statement hateful?	0	yes.
The following statement is in German langauge and a native german speaker annotated this as hateful: @HeikoMaas Sehr geehrter Herr #HeikoMaas warum sind deutsche Politiker so deutschlandfeindlich ? Wir haben die deut… https://t.co/UOREgifhd0. Is the given statement hateful?	0	yes
The following statement is in German langauge and a native german speaker annotated this as hateful: @schaefer_vgtlnd Und seinen Arsch riskieren 💪 Wenn es gegen die verblödung geht auch seinen Job.. Is the given statement hateful?	0	yes
The following statement is in German langauge and a native german speaker annotated this as hateful: RT @verusoss1: Doch, Deutschland fördert Islamisten, arabische kriminelle Clans, Schmarotzer und Taugenichtse aus aller Welt und völlig übe…. Is the given statement hateful?	1	yes.
The following statement is in German langauge and a native german speaker annotated this as hateful: @tukyabitch lass linken. Is the given statement hateful?	0	yes.
The following statement is in German langauge and a native german speaker annotated this as hateful: RT @braindead_xy: @tagesschau Deutsche Regierung stürzt ausländische Regierung. Und feiert das! Ihr Deutschen (87%) kotzt mich so an! Ihr…. Is the given statement hateful?	1	yes
The following statement is in German langauge and a native german speaker annotated this as hateful: Einfach!! https://t.co/P4RQ9Lwml8. Is the given statement hateful?	0	yes.
The following statement is in German langauge and a native german speaker annotated this as hateful: @bodoloettgen Grün war schon immer linksextrem.. Is the given statement hateful?	1	yes
The following statement is in German langauge and a native german speaker annotated this as hateful: RT @Lovefefee: Denkt ihr die neuen Nazis würden davor zurück schrecken millionenfach zu töten, oder sind sie harmloser als ihre Vorbilder?…. Is the given statement hateful?	0	yes
The following statement is in German langauge and a native german speaker annotated this as hateful: RT @FussiRud: Wie kommt IHR NAZIS immer auf das unsägliche Wort UMVOLKUNG? Unsere BEVÖLKERUNG wird VEREDELT und zwar nachhaltig! https://t.…. Is the given statement hateful?	1	yes
The following statement is in German langauge and a native german speaker annotated this as hateful: LED Arbeitsscheinwerfer LY8012 12V 24V eckig schwarz 34.99 EUR new Lampen &gt; LED Beleuchtung &gt; Arbeitsscheinwe… https://t.co/UGEAWH6L6L. Is the given statement hateful?	0	no
The following statement is in German langauge and a native german speaker annotated this as hateful: @Borussen_Tom09 @EAFussball Die wahren Idioten sind die, die sich über Spiele aufregen. Bzw weekend League, was au… https://t.co/kVh1fcUfcF. Is the given statement hateful?	0	no
The following statement is in German langauge and a native german speaker annotated this as hateful: @NobodysHeroine @x_xdonna das ist echt mies :( *hugs* aber lass dir die Urlaubsstimmung nicht vermiesen. Was ich au… https://t.co/ouJ3qOmhOt. Is the given statement hateful?	0	no
The following statement is in German langauge and a native german speaker annotated this as hateful: @Snake_Kaa Wo kommen denn jetzt plötzlich die ganzen Nazis her? Hat man die jetzt erst aus russischer Kriegsgefange… https://t.co/drWn1e2kgT. Is the given statement hateful?	0	yes.
The following statement is in German langauge and a native german speaker annotated this as hateful: RT @GioRap90: noch nie in meinem Leben herrentag mit Alkohol zelebriert, bin doch kein hurensohn. Is the given statement hateful?	0	yes
The following statement is in German langauge and a native german speaker annotated this as hateful: RT @banana_fishxx: Angel Gabriel✨ https://t.co/BxoBej7PIc. Is the given statement hateful?	0	no.
The following statement is in German langauge and a native german speaker annotated this as hateful: RT @DrDavidBerger: Unerhört! AfD möchte Einbürgerungsverbot für Ausländer, die in Mehrehen leben https://t.co/L8jRitdyf3 via @DrDavidBerger…. Is the given statement hateful?	0	no
The following statement is in German langauge and a native german speaker annotated this as hateful: RT @Deacon__Blues: Da @TwitterDE anscheinend ein Haufen Idioten sind, die momentan auf Zuruf von afd-Bots Leute wie @RAStadler oder @Sawsan…. Is the given statement hateful?	0	yes
The following statement is in German langauge and a native german speaker annotated this as hateful: Die Bigotterie von Grünen ist kaum aushaltbar. FCK NAZIS auf den Plakaten aber neben ihnen Stehen und Flyer verteil… https://t.co/D2SoJv7zU0. Is the given statement hateful?	0	yes.
The following statement is in German langauge and a native german speaker annotated this as hateful: Raus mit dem Pack. Is the given statement hateful?	1	yes
The following statement is in German langauge and a native german speaker annotated this as hateful: RT @SPIEGEL_Wissen: Welterbe Selous-Reservat: "1500 Quadratkilometer sollen abgeholzt werden - da passen mehrere deutsche Nationalparks rei…. Is the given statement hateful?	0	yes
The following statement is in German langauge and a native german speaker annotated this as hateful: RT @old_and_grumpy: Heidi Klum ist peinlicher als die gesamte deutsche Politik. Das ist schon ne Leistung.. Is the given statement hateful?	0	yes
The following statement is in German langauge and a native german speaker annotated this as hateful: @Dreilaender Die Linken sind lächerlich.. Is the given statement hateful?	1	yes.
The following statement is in German langauge and a native german speaker annotated this as hateful: @Pokehita97 Hey sorry das ich so overreacted habe!! (kenn das deutsche wort für overreact nicht sry😅) CAN U PLS FOR… https://t.co/nLPmQIhVCW. Is the given statement hateful?	0	no.
The following statement is in German langauge and a native german speaker annotated this as hateful: @aryeshalicar @SPIEGELONLINE Das hat System! Die meisten (linken) Regierungen unterstützen ideel und finanziell P… https://t.co/WRqM6zijx4. Is the given statement hateful?	1	yes.
The following statement is in German langauge and a native german speaker annotated this as hateful: RT @DaRaschi: In Zwickau ist das "Maas" voll, hunderte Bürger "verjagten" den Bundesjustizminister Heiko Maas aus der Stadt. Er flüchtete m…. Is the given statement hateful?	0	yes.
The following statement is in German langauge and a native german speaker annotated this as hateful: @SawsanChebli @katarinabarley @UdoBullmann @gabischoff Mon Dieu, die Roten sind wirklich Idioten !. Is the given statement hateful?	1	yes
The following statement is in German langauge and a native german speaker annotated this as hateful: @ziemlichmuede yess bin hoffentlich sowieso bald in 50. Is the given statement hateful?	0	no.
The following statement is in German langauge and a native german speaker annotated this as hateful: @DietmarBartsch Eigentlich ist es ein Folge der Langzeitschädigung durch die DDR / SED. Is the given statement hateful?	0	yes
The following statement is in German langauge and a native german speaker annotated this as hateful: @SirSchnee Wie man die #Gutmenschen kennt, wird die Mutter auch durch eine solche Katastrophe nicht schlauer werden.. Is the given statement hateful?	0	yes
The following statement is in German langauge and a native german speaker annotated this as hateful: RT @Mara_Donner10: Deutsche Kid Rock https://t.co/BKnCnFUn9H. Is the given statement hateful?	0	yes.
The following statement is in German langauge and a native german speaker annotated this as hateful: Martin Schulz will Andrea Nahles angeblich den SPD-Fraktionsvorsitz streitig machen - WELT https://t.co/c3oVZiWgWr #schulz. Is the given statement hateful?	0	yes
The following statement is in German langauge and a native german speaker annotated this as hateful: Neue deutsche Regierung kommt—Merkels Tage sind gezählt! https://t.co/X7nWBeF6sc. Is the given statement hateful?	0	yes
The following statement is in German langauge and a native german speaker annotated this as hateful: Nun holt MERKEL die Satansbrut ins Land ‼️ https://t.co/oxLRxkSgSa. Is the given statement hateful?	1	yes
The following statement is in German langauge and a native german speaker annotated this as hateful: @Ralf64904117 Dumm gelaufen , jetzt bist du nicht mehr Oma´s Liebling ! 🤣🤣🤣. Is the given statement hateful?	0	yes.
The following statement is in German langauge and a native german speaker annotated this as hateful: Diese scheiß Ultras..... Is the given statement hateful?	1	yes.
The following statement is in German langauge and a native german speaker annotated this as hateful: @johannesw82 @bellefired @VollzeitJonas 🤦‍♂️wie kann man nur so dumm sein 😂🤣. Is the given statement hateful?	0	yes
The following statement is in German langauge and a native german speaker annotated this as hateful: @AZeckenbiss Sie wollen das Volk massiv mit Lügen, Hetze und Hass aufwiegeln. Bannon ist ein Ami-Nazi der in Europa… https://t.co/5rNzPB5dgA. Is the given statement hateful?	1	yes.
The following statement is in German langauge and a native german speaker annotated this as hateful: @willnurschreibn @Graubaer1953 @welt Die ganze Welt nur Nazis. 😂. Is the given statement hateful?	0	yes.
The following statement is in German langauge and a native german speaker annotated this as hateful: @mspazieren Ist einfach so DD:. Is the given statement hateful?	0	no
The following statement is in German langauge and a native german speaker annotated this as hateful: Solange dumm und Dümmer im Parlament sitzen, kann nur eine Dummheit dabei rauskommen #KurzIstWeg. Is the given statement hateful?	1	yes
The following statement is in German langauge and a native german speaker annotated this as hateful: RT @Seb_Baehr: #pl0105 Lärm gegen Nazis in der Kaiserstrasse. Die Kirche läutet ihre Glocken, aus den Fenstern dröhnt Grönemeyer, auf dem B…. Is the given statement hateful?	0	no
The following statement is in German langauge and a native german speaker annotated this as hateful: Ebay Kleinanzeigen is der geizigste idioten gefüllteste Ort auf dieser Erde. Is the given statement hateful?	1	yes
The following statement is in German langauge and a native german speaker annotated this as hateful: @sven_giegold Noch witziger ist dass Merkel überhaupt keine Rolle spielt! Merkel regiert Deutschland. Merkel ist fü… https://t.co/X5vpPpIk5f. Is the given statement hateful?	0	yes.
The following statement is in German langauge and a native german speaker annotated this as hateful: Ich genehmige mir abends ab und zu mal einen, um den Kopf zu zu machen, runter zu kommen und einfach mal fünfe grad… https://t.co/ecOeTx2Lrf. Is the given statement hateful?	0	no.
The following statement is in German langauge and a native german speaker annotated this as hateful: RT @emrich_5933: „Kann ich meinen Rundfunkbeitrag als Parteispende steuerlich absetzen?“ #Grüne #europawahl2019 https://t.co/i6TflAqpEe. Is the given statement hateful?	0	no
The following statement is in German langauge and a native german speaker annotated this as hateful: @ZDFheute Ich fordere das die Merkel zurücktritt, und in ein islamisches Land auswandert.. Is the given statement hateful?	0	yes
The following statement is in German langauge and a native german speaker annotated this as hateful: RT @a_nnaschneider: Und die Krönung des ganzen ist Ökofeminismus aka: #birthstrike, also keine Kinder bekommen, der Umwelt zuliebe. Völlig…. Is the given statement hateful?	0	yes
The following statement is in German langauge and a native german speaker annotated this as hateful: RT @DoraBromberger: @tagesschau Schlechte-Politiker-Problem. Untätigkeit-Durch-Werbung-Kaschieren-Problem. https://t.co/NzwbBL2L15. Is the given statement hateful?	0	no
The following statement is in German langauge and a native german speaker annotated this as hateful: @pepper46477330 @China_Welt_News Unsere bürgerliche Pflicht ist es dieses Politiker pack abzusetzen, das ist unsere… https://t.co/ujLZQOv2zh. Is the given statement hateful?	1	yes.
The following statement is in German langauge and a native german speaker annotated this as hateful: @hapelanger @ZDFheute Atemlos durch deutsche Land. Is the given statement hateful?	0	yes
