# Supplementary material
Source: ML conference proceedings conference paper supplement (https://aclanthology.org/2024.emnlp-main.886)
Supplement: software [file PH_5.xlsx]

## Sheet: Sheet1
text	label	gpt
The following statement is in Hindi langauge and a non-native hindi annotated this as hateful: RT @Avinash78729927: @manishpune2000 @rishikeshlaw अरे भाई इन पांडु से क्या बात करते हो, ये लोग गन्ने को चूसकर फेक गए सिट्ठी है साले । इन क…. Is the given statement hateful?	1	yes
The following statement is in Hindi langauge and a non-native hindi annotated this as hateful: @yourfavnowar 2al ya3ny elwad gab el 99% hhhh. Is the given statement hateful?	0	no.
The following statement is in Hindi langauge and a non-native hindi annotated this as hateful: RT @Raghu__Charan: मरी हुयी दादी की नाक वोट बटोरने के लिए इस्तेमाल किया जा सकता है,पर मरे हुए घोटालेबाज और कातिल बाप का इतिहास याद दिलाना…. Is the given statement hateful?	1	yes
The following statement is in Hindi langauge and a non-native hindi annotated this as hateful: @DrKumarVishwas छोड़िए इन बेकार के लोगों के बातो को. Is the given statement hateful?	0	no.
The following statement is in Hindi langauge and a non-native hindi annotated this as hateful: RT @AnantGJ: "एक मोदी के पीछे सारी दुनिया हाथ धोकर पड़ गई है. मतबल साफ़ है बंदे में सिर्फ़ दम ही नहीं, सारी दुनिया को अपने पीछे नचाने की ता…. Is the given statement hateful?	0	yes
The following statement is in Hindi langauge and a non-native hindi annotated this as hateful: RT @saitanBacha: @Kanatunga हाथ के कलर से दलित लग रहे हो 😅😅😂😂😂😂. Is the given statement hateful?	1	yes.
The following statement is in Hindi langauge and a non-native hindi annotated this as hateful: कांग्रेस के नारे 'अब होगा न्याय' का अर्थ यही है कि वो कबूल रहे है कि 60 सालो तक उन्होने अन्याय किया - मान. #नरेंद्र_मोदी_जी #HarVoteModiKo #PhirEkBaarModiSarkar #MainBhiChowkidar #ModiAgain #ModiHaiToMumkinHai https://t.co/gQd2bmXyG7. Is the given statement hateful?	1	no
The following statement is in Hindi langauge and a non-native hindi annotated this as hateful: RT @TheTiya_: देश का चुनाव है दिल्ली का नहीं... शेर का चुनाव है बिल्ली का नहीं #अबकी_बार_400_पार #आयेगा_तो_मोदी_ही. Is the given statement hateful?	0	no
The following statement is in Hindi langauge and a non-native hindi annotated this as hateful: RT @TheRitamApp: तत्कालीन सरकार के इशारे पर पूरे हिन्दू समाज को बदनाम करने की लिए, मुझे फंसाने की साजिश चल रही थी और इसमें सभी जांच एजेंसि…. Is the given statement hateful?	0	no
The following statement is in Hindi langauge and a non-native hindi annotated this as hateful: @kapsology @Aam_Nationalist सबक नहीं सीखाया मुसलमानों का नरसंहार किया. Is the given statement hateful?	1	yes.
The following statement is in Hindi langauge and a non-native hindi annotated this as hateful: RT @ashokshrivasta6: नेताओं के हल्के-फुल्के पल/चुनाव में या यूं भी दिखाना हमेशा होता रहा है। इसमें कुछ गलत नहीं। लेकिन दिक्कत ये है कि मोदी…. Is the given statement hateful?	0	no
The following statement is in Hindi langauge and a non-native hindi annotated this as hateful: RT @SengarAjay505: @ANI कोई दिक्कत नही, दीदी का चुनाव भाजपा का हर कार्यकर्ता लड़ेगा और जीतेगा भी. Is the given statement hateful?	0	no
The following statement is in Hindi langauge and a non-native hindi annotated this as hateful: RT @KamleshDassi1: #BlackSpotOnJudiciary इस भ्रष्ट सरकार ने मीडिया से मिलकर एक बार भी नहीं सोचा कि 2014 मैं 18 नवंबर को जो बरवाला कांड करवा…. Is the given statement hateful?	1	no
The following statement is in Hindi langauge and a non-native hindi annotated this as hateful: RT @Rundayadav: @RishiDarshan एसिडिटी मिटानी हो तो वज्रासन में बेठे और श्वास बाहर निकाल और पेट को अंदर बाहर किया इससे एसिडिटी मिट जायेगी।#…. Is the given statement hateful?	0	no
The following statement is in Hindi langauge and a non-native hindi annotated this as hateful: @sardanarohit गढ़चिरौली के शहीदों की शहादत पर आपका खून क्यों नही खोल रहा!!! आपकी आतंकवाद के प्रति लड़ाई फ़र्ज़ी है कोई DP ब्लैक नही, कोई मोमबत्ती गैंग नही सड़कों पर कोई नारेबाजी जुलूस नही क्यों???? आखिर क्यों???? कुछ मिस है, फील नही आ रहा, क्या मिसिंग है वो????????. Is the given statement hateful?	1	no
The following statement is in Hindi langauge and a non-native hindi annotated this as hateful: @VinodCh37510957 @DrAshish_A1 @Deepak08463847 रोज मार कर भगा रहे है, क्योकि यूपी बिहारी यो ने थोड़ी भी खाली जगह देखली तो वहाँ पर ठेला लगाकर गंदगी फैलाना शुरू कर देते है. Is the given statement hateful?	1	yes
The following statement is in Hindi langauge and a non-native hindi annotated this as hateful: , @INCIndia 1. 1984- हुआ तो हुआ 2. 1984-भगाया तो भगाया (भोपाल गैस) 3. 1986- गए तो गए (विराट पिकनिक) 4. 1988 - ली तो ली (बोफोर्स) 5. 1990- काटा तो काटा (कश्मीरी पंडित) 6. 2008- मरे तो मरे ( 26/11) 7. 2009-2014- लूटा तो लूटा (2G, Coal &amp; CWG) @ABHM4GUJARAT #HuaToHua. Is the given statement hateful?	1	yes, the given statement
The following statement is in Hindi langauge and a non-native hindi annotated this as hateful: RT @dev_kundan: @yadavtejashwi @laluprasadrjd कितना भी कुछ कर लीजिए बिहार की जनता अब पहले वाली नही है , 7 सीट से ज्यादा नही आने वाली है ,…. Is the given statement hateful?	0	no
The following statement is in Hindi langauge and a non-native hindi annotated this as hateful: RT @maliniawasthi: बंगाल में जिस तरह हर फ़ेज़ में चुनावी हिंसा देखने को मिल रही है,यह लोकतंत्र की हत्या है!आश्चर्य है कि बात बात पर असहिष्…. Is the given statement hateful?	1	no
The following statement is in Hindi langauge and a non-native hindi annotated this as hateful: @irvpaswan @narendramodi @iramvilaspaswan मा.बहन जी ध्दारा @narendramodi की जाती को लेकर आलोचना करना तूम जैसे दलालों के पीछवाडे पर लात मारना है कुछ समझे की नाहीं बुड़बक।. Is the given statement hateful?	1	yes
The following statement is in Hindi langauge and a non-native hindi annotated this as hateful: @ANI जिस तरह से कांग्रेस बौखला गई है दिल मिला रही है इससे यह साबित हो गया है कांग्रेस का सूपड़ा साफ है कांग्रेस खत्म हो चुकी है अब भविष्य में कभी भी कांग्रेस की सरकार नहीं बनने वाली है जिस तरह की यह भाषा का उपयोग कर रहे हैं वह भाषा साबित कर रही है यह लोग चुनाव हार गए. Is the given statement hateful?	1	no
The following statement is in Hindi langauge and a non-native hindi annotated this as hateful: RT @Gujju_Er: एक आतंकी जिसे कांग्रेस ने 'शांतिदूत' करार दिया था https://t.co/MS6gZRBTfc. Is the given statement hateful?	1	no.
The following statement is in Hindi langauge and a non-native hindi annotated this as hateful: RT @Aastha9305: दो हजार छेदों वाली टोपी को पहने नेताओं को देखने के लिए आंखें तरस रही हैं, कहाँ छुपे हुए हो धूर्त निकम्मे धोखेबाज़ छद्म से…. Is the given statement hateful?	1	yes
The following statement is in Hindi langauge and a non-native hindi annotated this as hateful: RT @agrey_sangita: कुछ चमचें Twitter पर तमंचे और बंदूक लिए फोटो डालते हैं 🙄🙄🙄 ये वहीं चमचें हैं जो पूछते हैं चच्चा ये 🐕…. Is the given statement hateful?	1	no
The following statement is in Hindi langauge and a non-native hindi annotated this as hateful: RT @BLUEE_BL00D: डेटा तो ऐसे गिना रही हो मैडम जैसे उनके 1 सफेद कुर्ता पजामा को तुम ही रोज जाकर धोकर इस्त्री करके अगली रैली के लिए तैयार कर…. Is the given statement hateful?	0	yes
The following statement is in Hindi langauge and a non-native hindi annotated this as hateful: RT @gchordia57: इस्लामिक लोग आतकवादी लोगों का विरोध करो आतकवादी को धर्म का सहारा मत दो इनको जलाओ https://t.co/P5rOuP7YO9. Is the given statement hateful?	1	yes
The following statement is in Hindi langauge and a non-native hindi annotated this as hateful: RT @BJP4India: राजस्थान में शर्मसार करने वाली घटनाएं हो रही हैं। वहां कांग्रेस सरकार आने के बाद 27 घटनाएं दलितों पर अत्याचार की हुई हैं: श्…. Is the given statement hateful?	1	no
The following statement is in Hindi langauge and a non-native hindi annotated this as hateful: RT @MPRakeshSingh: आज संयुक्त राष्ट्र ने आतंकी #MasoodAzhar को अंतर्राष्ट्रीय आतंकवादी घोषित कर दिया है। यह मोदी सरकार की विदेश और कूटनीति…. Is the given statement hateful?	0	no
The following statement is in Hindi langauge and a non-native hindi annotated this as hateful: शुरू में तो इंजन ही स्टार्ट नहीं हो रहा था, मैंने कहा थोड़ा सा टेढ़ा करके फिर किक मारो तो स्टार्ट हो जाएगा, फिर एक अफसर बोला की सर इसमें किक मारने की जरूरत नहीं पड़ती है बटन दबने से काम चल जाता है, तो मैंने कहा कोई बात... https://t.co/AyRXV7MHwi. Is the given statement hateful?	0	no.
The following statement is in Hindi langauge and a non-native hindi annotated this as hateful: RT @DhananjayPraj15: @MendheNarendra @siddhpal हिंदू साधु संतों को बदनाम करने की पुरजोर साजिश चल रही है क्योंकि भारत में कई करोड़ जनता हिं…. Is the given statement hateful?	1	no
The following statement is in Hindi langauge and a non-native hindi annotated this as hateful: RT @DrRutvij: हर वर्ग के लोग इस सरकार से त्रस्त हैं और आने वाली 19 मई को जनता गुंडा राज से मुक्ति पाने के लिए पुनः लोकतंत्र की स्थापना हो ए…. Is the given statement hateful?	1	no
The following statement is in Hindi langauge and a non-native hindi annotated this as hateful: @kottayimavoor दिल्ली वालो आप के सातों को हरा दो ये कजरी के सपोर्टर हारने चाहिए. Is the given statement hateful?	1	yes.
The following statement is in Hindi langauge and a non-native hindi annotated this as hateful: RT @ArunbajpaiRajan: चमचो की हालत उस पीड़ित पत्नी जैसी है, जिसका पति दारू पीता है, जुआ खेलता है, मारता-पीटता है, पर वो कहती है, मेरा प…. Is the given statement hateful?	1	yes
The following statement is in Hindi langauge and a non-native hindi annotated this as hateful: ये मुस्कराहट सलामत रखना मेरे मौला ये फलीस्तीन पैगम्बरों की ज़मी है बंज़र जरूर है लेकिन बुज़दिल पैदा नहीं करती।। https://t.co/VliwD8Vjbu. Is the given statement hateful?	0	no.
The following statement is in Hindi langauge and a non-native hindi annotated this as hateful: RT @KundanTiwary12: देश हित में जरूर वोट करें-- https://t.co/ZWWcjessag. Is the given statement hateful?	0	no
The following statement is in Hindi langauge and a non-native hindi annotated this as hateful: RT @Aman_Yadav0912: @DesiStupides चुनाव आयोग नही, चमचा आयोग।. Is the given statement hateful?	1	no.
The following statement is in Hindi langauge and a non-native hindi annotated this as hateful: कहां भाग गया लालू का लाल। बहुत गुंडागर्दी फैलाई है लालू ने और आज उसका असर समाज को झेलना पड़ रहा है।. Is the given statement hateful?	1	no
The following statement is in Hindi langauge and a non-native hindi annotated this as hateful: @narendramodi हिम्मत तो बस आम के खेत जाने वाले में है ।हमारे यहाँ तो आम के बाग होते हैं ।और इन हिम्मत के पहलवान को जनता और लोगों के बीच में कभी नहीं देखा ।इतनी हिम्मत है पहलवान में कि अपने देश की जनता के बीच नहीं जा सकते ।. Is the given statement hateful?	0	no
The following statement is in Hindi langauge and a non-native hindi annotated this as hateful: RT @BJP4India: ये चुनाव गरीबों के लिए दिन रात मेहनत करने वाले हम लोग और सामने अहंकार में डूबकर हर बात पर हाथ ऊपर कर देना और यही कहना- 'हुआ…. Is the given statement hateful?	0	no
The following statement is in Hindi langauge and a non-native hindi annotated this as hateful: कश्मीर' में पाकिस्तानी तो रह सकता है, मगर भारतीय नहीं । ये कानून बनाने वाली कांग्रेस कहती है ।। अब होगा न्याय । 😊😊😊 https://t.co/cfpDZOOOah. Is the given statement hateful?	0	yes
The following statement is in Hindi langauge and a non-native hindi annotated this as hateful: RT @SChaudharyINC: BJP ने मुझे चुनाव न लड़ने के लिए 20 करोड़ का ऑफर दिया था और बोला गया की अगर में चुनाव में नही बैठा तो अंजाम बुरा होगा, प…. Is the given statement hateful?	1	no
The following statement is in Hindi langauge and a non-native hindi annotated this as hateful: @aajtak Desh ka sath or vikash kariye g. Is the given statement hateful?	0	no.
The following statement is in Hindi langauge and a non-native hindi annotated this as hateful: RT @BJP4India: भ्रष्टाचार हो, महंगाई हो या 1984 में हजारों सिखों का कत्ल हुआ हो इनका जवाब यही होता है- 'हुआ तो हुआ'। जिस अहंकार में ये लोग…. Is the given statement hateful?	1	yes.
The following statement is in Hindi langauge and a non-native hindi annotated this as hateful: @_The_Daredevil @kamaalrkhan @KRKBoxOffice @msdhoni IPL पैसों के लिए हो रहा है, देश के लिए नही. Is the given statement hateful?	0	no
The following statement is in Hindi langauge and a non-native hindi annotated this as hateful: RT @Mkdas34900947: #Allah_Kabir पूर्ण ब्रह्म कबीर साहिब चारों युग परवान झूठे गुरुवा मर गए हो गए भूत मसान परमात्मा कबीर साहेब चारों युगों…. Is the given statement hateful?	0	no.
The following statement is in Hindi langauge and a non-native hindi annotated this as hateful: RT @drdineshbjp: आतंकी मसूद अजहर को संयुक्त राष्ट्र संघ द्वारा अंतरराष्ट्रीय आतंकी घोषित किया जाना, भारत की बड़ी और कूटनीतिक सफलता है। यह न…. Is the given statement hateful?	0	no
The following statement is in Hindi langauge and a non-native hindi annotated this as hateful: @AmbivertForever पिन कर दूंगा इस ट्वीट को ताकि लोगों को पता चलता रहे की ऐसा भी कर सकते हैं 😁😬😁😬😸. Is the given statement hateful?	0	no.
The following statement is in Hindi langauge and a non-native hindi annotated this as hateful: ऊना में बंदरों के आतंक से लोग परेशा, ग्रामीणों ने सड़क पर दिया धरना #HimachalPradesh #HimachalNews https://t.co/UwhB2YsfA3. Is the given statement hateful?	0	yes
The following statement is in Hindi langauge and a non-native hindi annotated this as hateful: आखिरकार सच मान ही लिया संसद की लोक लेखा समिति(पीएसी)कमेटी ने कि ऑगनबाडी बहिनें बहुत ही कम (नाम मात्र) 4500/-रू•मानदेय पर कार्य कर रही है।और जब चुनाव आते है तो झूठा आश्वासन देकर हर दल इनके साथ छलावा करता है।अब भी न्याय न मिले तो धिक्कार है केंद्र और राज्य सरकार पर https://t.co/prThdDuNLX. Is the given st…	1	no
The following statement is in Hindi langauge and a non-native hindi annotated this as hateful: RT @myogiadityanath: भारत की आतंक के खिलाफ वैश्विक मुहिम में कूटनीतिक सफलता, #UNSC ने आखिरकार जैश के मुखिया और पुलवामा के दोषी मसूद अजहर को…. Is the given statement hateful?	0	no
The following statement is in Hindi langauge and a non-native hindi annotated this as hateful: RT @rishibagree: ऐसा पहली बार हो रहा है कि आज़मगढ़ की 140 बूथों पर बूथ कैप्चरिंग नहीं हो पा रही है। अखिलेश यादव जब ये कहते पाए गए कि आज़मग…. Is the given statement hateful?	0	no
The following statement is in Hindi langauge and a non-native hindi annotated this as hateful: @MajorPoonia :) copying n changing with masoom केजरीवाल का अगला भाषण “मोदी जी, 300 सीटों के लिए और कितने मासूमो को बैन कराओगे” #MasoodAzhar. Is the given statement hateful?	0	no.
The following statement is in Hindi langauge and a non-native hindi annotated this as hateful: RT @ShaliniSaffron: आज तो चमचों केलिए बहुत बुरा दिन था.. और बाकी पूरे भारत केलिए खुशी की!! 💥#GST अब तक कि सबसे यशस्वी tax reform बना, अब त…. Is the given statement hateful?	0	no
The following statement is in Hindi langauge and a non-native hindi annotated this as hateful: @ReallySwara @dilipkpandey @AAPDelhi कठुआ मामले में सड़को पर उतरे तमाम तथाकथित #बुद्धिजीवी, #Celebs इस बार वो तेजी या वो आक्रोश नहीं दिखा रहे हैं ,,😠😠😠 कश्मीर में 3 साल की बच्ची से बलात्कार.. बलात्कारी का नाम ताहिर अहमद जिसने रोज़ा इफ्तारी से पहले दिखाई थी टॉफी!!. Is the given statement hateful?	1	yes
The following statement is in Hindi langauge and a non-native hindi annotated this as hateful: पैदा करती है परवरिश करती है बोलना सिखाती है अफ़सोस की तुम्हारी गालियों में उसी का नाम आता है. Is the given statement hateful?	0	no
The following statement is in Hindi langauge and a non-native hindi annotated this as hateful: RT @Hindinama2: जितना तुमने उसे प्रेम किया अब उससे उतनी ही नफ़रत कर डालो इसी तरह भूल पाओगी तुम उसे और फिर एक दिन सब शांत हो जायेगा उसके लिए…. Is the given statement hateful?	0	yes
The following statement is in Hindi langauge and a non-native hindi annotated this as hateful: RT @Virende72294454: #WednesdayWisdom #वेद_मेरा_भेद_है क्या आप जानते है ? कबीर परमेश्वर तीसरे मुक्ति धाम में अर्थात सतलोक में रहते है, जन…. Is the given statement hateful?	0	no
The following statement is in Hindi langauge and a non-native hindi annotated this as hateful: RT @iArmySupporter: सौगंध मुझे इस मिट्टी की मैं देश नहीं झुकने दूंगा। संयुक्त राष्ट्र द्वारा मसूद अजहर को ग्लोबल आतंकवादी घोषित किया जाना…. Is the given statement hateful?	0	no
The following statement is in Hindi langauge and a non-native hindi annotated this as hateful: @sunita_omguru "अपनाइए बेहतरीन 11 useful #SummerHealthTipsByBapuji गर्मी भगाने हेतु, इन्हें अपना कर आप गर्मियों में बने रह सकते हैं सुरक्षित ! https://t.co/R8tBLllHpZ". Is the given statement hateful?	0	no
The following statement is in Hindi langauge and a non-native hindi annotated this as hateful: RT @satishchoubey7: UN द्वारा मसूद अजहर को ग्लोबल आतंकी घोषित करने के खिलाफ कांंग्रेस जा सकती है निर्वाचन आयोग, ये आचार संहिता के उल्लंघन…. Is the given statement hateful?	0	no
The following statement is in Hindi langauge and a non-native hindi annotated this as hateful: @BaghiKumar अन्य पत्रकारों को भक्त कहने वाले महान पत्रकार ने राहुल से नेशनल हेरल्ड पर एक भी सवाल नहीं किया । इससे बड़ा सबूत और क्या चाहिए की यह इस ख़ानदान का ही चमचा है. Is the given statement hateful?	1	no.
The following statement is in Hindi langauge and a non-native hindi annotated this as hateful: मेरी निष्ठा, मेरी नीयत और मेरी नीति का आकलन कम ज्यादा तो हो सकता है, लेकिन कोई खोट नहीं निकाल सकता, ये मैं विश्वास के साथ कह सकता हूं। ऐसा इसलिए है क्योंकि मैं जनता के बीच में रहता हूं, जनता से निरंतर संवाद करता हूं : प्रधानमंत्री श्री नरेन्द्र मोदी #MeraVoteModiKo. Is the given statement hateful?	0	no.
The following statement is in Hindi langauge and a non-native hindi annotated this as hateful: @BJP4India @AmitShah कांग्रेस वंशवादी पार्टी 70 सालों से देश के संसाधनों की लूट करके अपने ऐशों आराम के लिए ही इस्तेमाल कर रही है और अपने चमचों को देश के तूकडे-तूकडे कर देश की बोटि या खिला रही है। जब कोई देश के लिए जी-जान लगाने की बात करता है, तो कुछ भ्रष्टाचारी, लोभी लोमड़ियो को डर लगने लगता है।. Is the…	1	no
The following statement is in Hindi langauge and a non-native hindi annotated this as hateful: @MamataOfficial हमारे देश की रक्षा के लिए इस ममता बनर्जी को पश्चिम बंगाल से हटाओ पश्चिम बंगल बचाओ यह सिर्फ राउडी असम करा है. Is the given statement hateful?	1	yes
The following statement is in Hindi langauge and a non-native hindi annotated this as hateful: RT @PRAN_JAL_80: #DeshModiKeSaath #AvengersEndame #वेद_मेरा_भेद_है कबीर परमात्मा कवियों की भूमिका करके अपना तत्वज्ञान प्रदान करता है उसकी…. Is the given statement hateful?	0	no
The following statement is in Hindi langauge and a non-native hindi annotated this as hateful: RT @mithleshkumarmi: शरीर से प्रेम है तो व्यायाम करें, आत्मा से प्रेम है तो ध्यान करें, देश से प्रेम है तो मतदान अवश्य करें। 🙏…. Is the given statement hateful?	0	no.
The following statement is in Hindi langauge and a non-native hindi annotated this as hateful: RT @Zakirh04: ' भाई टुकड़े -टुकड़े गैंग की बौखलाहट बता रही है की इनका सूपड़ा साफ है हताशा ,निराशा , मुरझायाचेहरा करोड़ो की मशरूम खाए थे सा…. Is the given statement hateful?	1	yes
The following statement is in Hindi langauge and a non-native hindi annotated this as hateful: RT @Jignesh05410960: @DrKumarVishwas जब जब भारत माँ के बेटे बटे, तब तब भारत माँ की भुजा ए कटी। मातृ दिवस की हार्दिक शुभकामनायें ।🙏🙏🙏 https:…. Is the given statement hateful?	0	no
The following statement is in Hindi langauge and a non-native hindi annotated this as hateful: RT @AbdulHa06460548: हमारे यहां एक गरीब चच्चा हैं जो 35 वर्षों से फटे पुराने बैग सिल रहे हैं जनाब मुफ्तआवास और गैस कनेक्शन लेने के बाद भी…. Is the given statement hateful?	0	no.
The following statement is in Hindi langauge and a non-native hindi annotated this as hateful: RT @Amod19739497: #ThursdayThoughts जो अनमोल ज्ञान हमारे शास्त्रो में हजारों वर्षों से वर्णित है उसे यह नकली ढोंगी गुरु नहीं समझ सके वे अ…. Is the given statement hateful?	1	no
The following statement is in Hindi langauge and a non-native hindi annotated this as hateful: RT @DaasJai: #WednesdayWisdom श्री कृष्ण के मरने के बाद में गोपियों को भीलों ने लूटा और अर्जुन को भी पीटा फिर भी लोग कृष्ण को ही भगवान मान…. Is the given statement hateful?	1	no.
The following statement is in Hindi langauge and a non-native hindi annotated this as hateful: RT @SudarshanNewsTV: श्रीराम की जन्मभूमि पर आत्महत्या कर लेगा एक मुसलमान… अगर फिर से मोदी न आये तो https://t.co/BYyQBpYYqC. Is the given statement hateful?	1	yes
The following statement is in Hindi langauge and a non-native hindi annotated this as hateful: RT @MamtaDaasi: #वेद_मेरा_भेद_है नकली धर्मगुरुओं को ज्ञान होता तो ,ब्रह्मा ,विष्णु, महेश के माता पिता का नाम बता देते इन को कुछ भी ज्ञान न…. Is the given statement hateful?	1	no
The following statement is in Hindi langauge and a non-native hindi annotated this as hateful: RT @aroraups: एक कटवे बूढ़े दिव्यांग चिचा (Lucknow वाले) जो हिंदू हिंदू बोल कर अपनी दुकान चला रहें है मेरे लिए बहुत दिनो से बकवास कर रहे है…. Is the given statement hateful?	1	yes
The following statement is in Hindi langauge and a non-native hindi annotated this as hateful: RT @ColdCigar: "इंजीनियर लोग शायद सड़क पे डिवाइडर बनाना भूल गए, देश के लिये मैं खुद ही खड़ा हो जाता हूँ।" #DividerInChief https://t.co/zFb…. Is the given statement hateful?	1	no
The following statement is in Hindi langauge and a non-native hindi annotated this as hateful: RT @tarsemkpahi: लोकतंत्र की ऐसी की तैसी 😳 EVM मशीनों को अगवा करने की अब जरूरत नही, धन बल के ज़ोर पर EVM का गला शरेआम घोंटा जा रहा है, लग…. Is the given statement hateful?	1	no
The following statement is in Hindi langauge and a non-native hindi annotated this as hateful: आतंकवाद खत्म करने वाले खा रहे खीर: अखिलेश - https://t.co/RyFlW6hZWu https://t.co/of29bVliCT. Is the given statement hateful?	1	no
The following statement is in Hindi langauge and a non-native hindi annotated this as hateful: @shrialokmishra @yadavakhilesh 23 मई के लिए आँसु बचा कर रखना कही बादलों में ना छुप जाए. Is the given statement hateful?	0	no.
The following statement is in Hindi langauge and a non-native hindi annotated this as hateful: RT @AmitShah: Divide and Rule का इतिहास कांग्रेस का रहा है। Divide and Rule तब हुआ जब कांग्रेस ने अपने वोटबैंक के लिए हिंदू आतंकवाद की फ़…. Is the given statement hateful?	1	yes
The following statement is in Hindi langauge and a non-native hindi annotated this as hateful: RT @BJP4UP: कांग्रेस सरकार की नीयत सही होती तो वो अलवर में जो हुआ, उसे छिपाने में, दबाने में नहीं लगती। लेकिन नहीं, इनके पास तो एक ही जवाब…. Is the given statement hateful?	1	no
The following statement is in Hindi langauge and a non-native hindi annotated this as hateful: RT @anuraagmuskaan: मसूद अज़हर को ग्लोबल आतंकी घोषित करवाने का क्रेडिट मोदी को नहीं जाता, ये कहने वाले अगली ही लाइन में ये भी कह रहे हैं की…. Is the given statement hateful?	0	no.
The following statement is in Hindi langauge and a non-native hindi annotated this as hateful: @PremShuklaBJP @RahulGandhi सर, इस पर भी पप्पू सबूत माँगेगे।।. Is the given statement hateful?	0	no.
The following statement is in Hindi langauge and a non-native hindi annotated this as hateful: RT @FunKeyBaat: #भगवा वस्त्र पहन कर मतदान नही कर सकते लेकिन बुरखा पहन के कर सकते हैं @yadavakhilesh ? ये आज़मगढ़ है और यहाँ से "टोटी चोर"…. Is the given statement hateful?	1	yes
The following statement is in Hindi langauge and a non-native hindi annotated this as hateful: RT @VishalGaur1111: हजारो लोग मरे, मीडिया ने नहीं दिखाया 🤔 किसी को कानो-कान खबर नही हुई और फिर भी मोदीजी को पता चल गया?पर कैसे? सर आप इतना…. Is the given statement hateful?	0	no
The following statement is in Hindi langauge and a non-native hindi annotated this as hateful: RT @subodh_tailang: कांग्रेस अपनी हार सामने देखकर इतनी बोखला गई है कि कोंग्रेस समर्थक पीठासीन अधिकारी ने अमेठी में गौरगंज के गूजरटोला बूथ…. Is the given statement hateful?	1	no
The following statement is in Hindi langauge and a non-native hindi annotated this as hateful: RT @ashupariharofc: नोटबन्दी के बाद.... खान शाहरूख, खान सलमान, खान आमिर कि कितनी फिल्में हिट हुई ..?...राज क्या है।. Is the given statement hateful?	0	no
The following statement is in Hindi langauge and a non-native hindi annotated this as hateful: RT @narpat57: @smritiirani इनके मा बाप के संस्कार है बच्चो में बाट रही है पिक्की. Is the given statement hateful?	0	yes.
The following statement is in Hindi langauge and a non-native hindi annotated this as hateful: @IshikaSiingh प्यार अपने धर्म मे करौ तौ अच्छा हॊता हैं. Is the given statement hateful?	1	no.
The following statement is in Hindi langauge and a non-native hindi annotated this as hateful: RT @AagayiNavya: वाह संघी मच्छर वाह... संघियों की बची हुई चाय में से दूध निकाल कर पेडिग्री के साथ खाने वाला भाजपा का पालतू Pइल्लॉ सिन्हा भी…. Is the given statement hateful?	1	yes
The following statement is in Hindi langauge and a non-native hindi annotated this as hateful: RT @TejBahudur: SP/BSP गटबंधन से टिकट मिलते ही मे भारतीय जवान देशद्रोही हो गया। और भाजपा से टिकट मिलते ही आतंकी प्रज्ञा देशभक्त हो गई! 😡. Is the given statement hateful?	1	yes
The following statement is in Hindi langauge and a non-native hindi annotated this as hateful: गुजरात उन पांच राज्यों में से एक है जिसमें हालिया दलितों पर अत्याचार में बढ़ोतरी दर्ज हुई हैं गुजरात: बारात में हुई घुड़चढ़ी तो दलितों के साथ किये तरह तरह के अत्याचार! https://t.co/U1OSpgs03w. Is the given statement hateful?	1	no
The following statement is in Hindi langauge and a non-native hindi annotated this as hateful: RT @sambit_swaraj1: अगर हिन्दु असहिष्णु है तो सिर्फ़ काश्मिरी पंडित हि क्यो विस्थापित है.. कश्मिरी मुसलमान क्यो नहि? अगर हिन्दु असहिष्…. Is the given statement hateful?	1	yes
The following statement is in Hindi langauge and a non-native hindi annotated this as hateful: RT @GraphicsMahi: दुष्यंत चौटाला जी को 5 साल बाद समझ आ ही गया कि #barwala में जो नरसंहार हुआ उसके लिए दोषी हरियाणा की भाजपा सरकार है.... ht…. Is the given statement hateful?	1	no
The following statement is in Hindi langauge and a non-native hindi annotated this as hateful: RT @piyushakak4: समझ में नहीं आ रहा कि देश में चुनाव हो ही क्यों रहा है.... सभी संस्थाएं, सारी एजेंसियां तो मोदी जी के पास है ही, वह अपने…. Is the given statement hateful?	1	no.
The following statement is in Hindi langauge and a non-native hindi annotated this as hateful: अक्सर देखा गया है आतंकवादी से लेकर कई गुनहित प्रवृत्ति के लोग बुर्के की आड़ में गलत काम करते पकडे जाते हैं, अगर बुर्के की आड़ में देशविरोधी काम या फर्जी वादा हो रहा हो तो उसे फ़ौरन प्रतिबंधित करना ही देश हित में है जिन्हे ये मांग सही लगता है वो अधिक से अधिक रीट्वीट करें 🙏. Is the given statement hateful?	1	no
The following statement is in Hindi langauge and a non-native hindi annotated this as hateful: RT @Pinkimishr: श्रीलंका की मस्जिदों में इतने हथियार निकल रहे हैं जबकि वहाँ पे मुसलमानों की संख्या 9.7% है! हमारे देश में क्या हालात हों…. Is the given statement hateful?	1	no
The following statement is in Hindi langauge and a non-native hindi annotated this as hateful: @ijokani गलत सुना है. Is the given statement hateful?	0	no.
The following statement is in Hindi langauge and a non-native hindi annotated this as hateful: RT @JitendraRishu: #वेद_मेरा_भेद_है तत्वज्ञानी रामपाल जी अमृत ज्ञान वर्षा करते हुए बताते है कि परमात्मा सहशरीर है उस का नाम कबीर है वह धू-…. Is the given statement hateful?	0	no
The following statement is in Hindi langauge and a non-native hindi annotated this as hateful: RT @sudhir94700: जब राजदीप सरदेसाई से ममता बनर्जी बोलीं- आप लोग तो नरेंद्र मोदी के पूरे दलाल बन गए हैं... https://t.co/KRYNpPSBBa Source :…. Is the given statement hateful?	1	yes
The following statement is in Hindi langauge and a non-native hindi annotated this as hateful: RT @LakhanKori6: #Ramzan2019 #RamadhanKareem मांस खाने का आदेश अल्लाह का नहीं है। हजरत आदम के शरीर में कोई पित्तर आ कर प्रवेश करता था। वही…. Is the given statement hateful?	0	no
The following statement is in Hindi langauge and a non-native hindi annotated this as hateful: और जो ब्यूटीफुल नहीं है उनके लिए क्या 😡😡😡😡😡😡😡😡😡😡😡😡😡😡😡😡😡😡😡😡😡😡😡😡😡😡. Is the given statement hateful?	0	yes.
The following statement is in Hindi langauge and a non-native hindi annotated this as hateful: यार क्या दिमाग पाया है भक्तो के गुरु ने नाली से गैस बनाते बनाते बादलों मे फाइटर जेट छीपाने का यंत्र भी खोज लिया,अब बस बाकी है भक्तो के दिमाग से गोबर गैस बनाना।. Is the given statement hateful?	1	yes.
The following statement is in Hindi langauge and a non-native hindi annotated this as hateful: RT @MadhuTripat14: चीन ने मसूद अजहर को आतंकी घोषित करके आचार संहिता का उल्लंघन किया .. मोदी जी को लाभ पहुंचाने के लिए सूरजेवाला ऐसा न…. Is the given statement hateful?	0	no
The following statement is in Hindi langauge and a non-native hindi annotated this as hateful: RT @I_Am_Narendra_: भाजपा और संघ की देशभक्ति केवल थोथी है ये दोगले लोग देश विरोधी नारों तक का बेजा इस्तेमाल कर रहे हैं ये देश की आन बान शान…. Is the given statement hateful?	1	yes
The following statement is in Hindi langauge and a non-native hindi annotated this as hateful: बंगाल में हिंसा रुक नहीं रही,TMC के गुंडों ने चुनाव के दिन भाजपा के 2 कार्यकर्ताओं की हत्या कर दी,जहां की मुख्यमंत्री खुद हत्याएं करवा रही है,जरा सोचो वहाँ लोग किस हाल में जी रहे होंगे !! सुनलो ममता सत्ता क्या तुम्हें तो नर्क में भी जगह नहीं मिलेगी !! #VotingRound6. Is the given statement hateful?	1	yes
The following statement is in Hindi langauge and a non-native hindi annotated this as hateful: RT @sakshijoshii: कौन किसको क्या गाली देता है कौन कैसे घर में रहता है किसके पिता कौन थे या माता कौन है क्या इन सब स्वार्थी बातों से मतदाता…. Is the given statement hateful?	0	no
The following statement is in Hindi langauge and a non-native hindi annotated this as hateful: RT @PaunMahesh_INC: भाजपा के शासन में यह कैसा लोकतंत्र ? गुजरात के ज़ुनागढ़ में मीडिया कर्मीओ पर जमकर लाठीया चलाई गई । ज़िम्मेवार के ख़िला…. Is the given statement hateful?	1	no
The following statement is in Hindi langauge and a non-native hindi annotated this as hateful: RT @guptaravinder71: सुनो जरा वेस्ट दिल्ली लोकसभा की टिकट 6 करोड में @ArvindKejriwal ने बेची ऎसा मेरा नही @AamAadmiParty के उम्मीदवार बल…. Is the given statement hateful?	0	no
The following statement is in Hindi langauge and a non-native hindi annotated this as hateful: नाम कमल हसन ,धर्म ईसाई,और गली देता है हिंदू धर्म को, ऐसा ही सैकुलर ह तो मुस्लिमों को आतंकवादी क्यों नहीं बोलता जो हर दिन कही ना कहीं बम फोड़ कर मानवता को शर्मसार कर रहे हैं । क्या उनसे इस दोगले भड़वे की फटती ह. Is the given statement hateful?	1	yes
The following statement is in Hindi langauge and a non-native hindi annotated this as hateful: इस्लाम एक रोज #mothers_day बना कर फरोमिटी निभाने नही बल्कि हर दिन Mothers के नाम करने कहता है. Is the given statement hateful?	0	no
The following statement is in Hindi langauge and a non-native hindi annotated this as hateful: वोट जरूर दें...✌ चाहे बीजेपी को, चाहे कमल को, चाहे मोदीजी को... पर मतदान जरूर करें..!! @RahulGandhi @ArvindKejriwal @MamataOfficial. Is the given statement hateful?	0	no.
The following statement is in Hindi langauge and a non-native hindi annotated this as hateful: RT @Aaliya11_: मुस्लिम_ईसाईयों की जबरन नसबंदी कर देनी चाहिए साध्वी ठाकुर मैडम जब अपनी जमीन बंजर हो तो दूसरों की खड़ी फसल देखक…. Is the given statement hateful?	1	yes
The following statement is in Hindi langauge and a non-native hindi annotated this as hateful: RT @JagratiGupta3: @sardanarohit अगर अभी ये कार्य BJP शासित राज्य में हुआ होता,तो पूरा विपक्ष और हर मीडिया चैनल इसको प्रमुखता से दिखाता।। प…. Is the given statement hateful?	1	no
The following statement is in Hindi langauge and a non-native hindi annotated this as hateful: RT @rahul_advo: एकरा के त टोटी जादो देखि के बौरा जइहें,दादा ई त भक्तन के भी भगत बा,मने निरहू के। फिर काहे न कहे निरहुवा टोटी बबुवा रोवा य…. Is the given statement hateful?	0	yes
The following statement is in Hindi langauge and a non-native hindi annotated this as hateful: RT @SheelaDasi5: #RamadanMubarak मांस खाने का आदेश अल्लाह का नहीं है। हजरत आदम के शरीर में कोई पित्तर आ कर प्रवेश करता था। वही माँस खाने का…. Is the given statement hateful?	1	no
The following statement is in Hindi langauge and a non-native hindi annotated this as hateful: @RPDULAR @SUBHASH_SHARMA1 अगर रोहंगिया मुसलमानों को भगाया नही गया तो,श्रीलंका में आज जो हो रहा है उससे कहीं ज्यादा भयानक भारत में होगा और यह होना निश्चित है. Is the given statement hateful?	1	yes
The following statement is in Hindi langauge and a non-native hindi annotated this as hateful: RT @BJPLive: 300 से ज्यादा लोक सभा क्षेत्र का दौरा करते-करते आज मैं अमृतसर आया हूं। पूरब-पश्चिम उत्तर-दक्षिण मैं जहां-जहां गया वहां भाषा ब…. Is the given statement hateful?	0	no
The following statement is in Hindi langauge and a non-native hindi annotated this as hateful: RT @ZeeNewsHindi: #Exclusive: भ्रष्टाचार के खिलाफ थी मेरी लड़ाई, मुझे ही देशद्रोही बना दिया गया- #TejBahadurYadav #AbkiBaarKiskiSarkar h…. Is the given statement hateful?	0	no
The following statement is in Hindi langauge and a non-native hindi annotated this as hateful: RT @HandsomAbhishek: रामचरित मानस में साफ लिखा है....... "जब जब होहिं धरम पर हानि बाढ़ाहिं असुर अधम अभिमानी तब तब प्रभु धरि मनुज शरीरा हर…. Is the given statement hateful?	0	no.
The following statement is in Hindi langauge and a non-native hindi annotated this as hateful: @sambitswaraj ऐसे लोगों को सबक जनता सिखाने जा रही है 😄😄. Is the given statement hateful?	0	no.
The following statement is in Hindi langauge and a non-native hindi annotated this as hateful: RT @ashokmistry4545: कभी कभी इंसान चिंता और तनाव में इंसान तब भी होता हैं, जब वो खुद के लिए कम और दूसरों के लिये ज्यादा सोचता/समझता है..!!…. Is the given statement hateful?	0	no
The following statement is in Hindi langauge and a non-native hindi annotated this as hateful: RT @Mohamma58796854: @I_am_Anil_Tyagi @MaheshP13388352 टाइम मैगज़ीन के विरोध में भक्तो की इतनी सुलगी हुई हे की कोई अगर टाइम भी पूछता हे…. Is the given statement hateful?	0	no
The following statement is in Hindi langauge and a non-native hindi annotated this as hateful: RT @BJP4India: जब इन्हें मौका मिला, तो इन लोगों ने अपने लिए लाखों-करोड़ों के बंगले बना लिए। जब मुझे सेवा का अवसर मिला तो मैंने मेरा बंगला…. Is the given statement hateful?	1	no
The following statement is in Hindi langauge and a non-native hindi annotated this as hateful: पहले लोग झूठ बोलते थे तो मीडिया सच ढूंढ कर लाती थी अब मीडिया झूठ बोलती है और सोशल मीडिया सच ढूंढकर सामने लाती है 😂😂😂. Is the given statement hateful?	0	no.
The following statement is in Hindi langauge and a non-native hindi annotated this as hateful: @gops333 @Khaleeluddink12 राजीव गांधी के पी एम होते जब पहली बार क्रूड के दाम कम हुए थे तो ये कहा गया कि बचत से पेट्रोल, डीज़ल के दाम कम नहीं किये जायेंगे, बल्कि जनता की भलाई के काम में लगाये जायेंगे।जहाॅं तो प्योर हिसाब का सवाल है। अगर 10 रु 5 लोगों में बाॅंटा जाय तो 2 रु हर एक को मिलेगा।ठीक से सुनिये न…	0	no
The following statement is in Hindi langauge and a non-native hindi annotated this as hateful: RT @PrakashJavdekar: फिर भी हमें विश्वास है की लोग गंभीरता से वोट कर रहे है और वोट करेंगे और पश्चिम बंगाल से इस बार बहुत ही अलग नतीजे आयें…. Is the given statement hateful?	0	no.
The following statement is in Hindi langauge and a non-native hindi annotated this as hateful: RT @BJP4India: कांग्रेस के एक बयान बहादुर, मुंहफट ने कहा कि मोदी को ऐसा छक्का मारो कि सीमा पार मरे। कांग्रेस वालों को आपके मोदी से इतनी नफ…. Is the given statement hateful?	1	yes
The following statement is in Hindi langauge and a non-native hindi annotated this as hateful: RT @Pinkimishr: हम रात को जाग जाग कर मोदी के लिये लिखते हैं। तो पागल मत समझो...!!! हम आने वाले पाँच साल चैन से सोने का इंतजाम कर रहे है 😊…. Is the given statement hateful?	0	no.
The following statement is in Hindi langauge and a non-native hindi annotated this as hateful: RT @devtimes: @SheilaDikshit @ArvindKejriwal आप के बारे में अफवा फैला कर तो बंदा CM बन गया😊😊😊. Is the given statement hateful?	0	no
The following statement is in Hindi langauge and a non-native hindi annotated this as hateful: RT @KeshavKarn11: वामपंथी और नेहरूवादी मीडिया हाउस की कथित ‘निष्पक्षता’ खतरे में है।सोशल मीडिया मुख्यधारा के पत्रकारों के पूर्वाग्रहों को उ…. Is the given statement hateful?	1	no
The following statement is in Hindi langauge and a non-native hindi annotated this as hateful: RT @VivekmMisra: घर आँगन छत देहरी सूनी, सूना है मन तुम बिन माँ ! तुम्ही नहीं तो क्या घर आँगन कैसी वर्षा, कैसा सावन माँ था अपार विस्तार तु…. Is the given statement hateful?	0	no.
The following statement is in Hindi langauge and a non-native hindi annotated this as hateful: RT @Sunil_rajsharma: हम मेहनत करके निकले हुए लोग हैं, मजदूर आदमी को जितना मान सम्मान मिलता है, उतना हमको भी मिलता है। हम मान सम्मान के लिए…. Is the given statement hateful?	0	no.
The following statement is in Hindi langauge and a non-native hindi annotated this as hateful: RT @himanis494: @shankarjio Narayan Sai व Sant Shri Asaram Bapu Ji के विरुद्ध कितनी भयंकर साजिश हुई है कि इतने सारे सबूतों को दरकिनार कर स…. Is the given statement hateful?	1	yes
The following statement is in Hindi langauge and a non-native hindi annotated this as hateful: इस्लामिक आतंकवाद को छुपाने के लिए किस प्रकार कांग्रेसी डायन ने हिन्दूओं को आतंकवादी घोषित करने का षड्यंत्र रचा, तथ्यों के साथ खुद देखिए... और निर्णय लीजिए कि आप झूठे और अधर्मी कांग्रेसी मानसिकता के साथ हैं या सत्य और धर्म के साथ @rajnathsingh @RahulGandhi @Hitler_Sona @Silpiii https://t.co/Ey1eM2LsDj. I…	1	yes
The following statement is in Hindi langauge and a non-native hindi annotated this as hateful: RT @SarojGi28026442: हिंदुस्तानी सावधान रहें अपने ही धर्मगुरुओं पर लगे आरोप सच्चा मानकर हंसी मजाक नही उड़ाये और अपने धर्म का नाश नही क…. Is the given statement hateful?	0	yes
The following statement is in Hindi langauge and a non-native hindi annotated this as hateful: RT @MahilaCongress: कांग्रेस के कार्यकर्ताओं के बिना, मैं कौन हूँ! कोई भी नहीं। कांग्रेस का मैं सिर्फ एक छोटा हिस्सा हूँ। कांग्रेस हर उस व्…. Is the given statement hateful?	0	no
The following statement is in Hindi langauge and a non-native hindi annotated this as hateful: RT @SherniPunjabi: अब डर सताने लगा है बांटने वालों को, हिंदुस्तान में गूंज रहे 'श्री राम' का, ऐक बंदे ने हिंदू, हिंदू से जोड़ दिया, बिना…. Is the given statement hateful?	0	yes
The following statement is in Hindi langauge and a non-native hindi annotated this as hateful: RT @BasicShiksha: सीबीएसई: डिजिलॉकर से डाउनलोड करें 10वीं व 12वीं की मार्कशीट, यह होगा डाउनलोड का तरीका #savecutoff90_97 https://t.co/E4V8F…. Is the given statement hateful?	0	no
The following statement is in Hindi langauge and a non-native hindi annotated this as hateful: RT @Megha15120179: #SundayMotivation दुर्गा देवी पुराण में दुर्गा अपनी भक्ति ना करने के लिए कह रही है वह केवल ओम की भक्ति करने के लिए कहती…. Is the given statement hateful?	0	no
The following statement is in Hindi langauge and a non-native hindi annotated this as hateful: RT @prakashsony13: राहुल के भूतपूर्व जीजा मसूद अजहर ग्लोबल आतंकी घोषित चमचो अब मत कहना मोदी ने क्या किया है जो नेहरू और गूंगा सरकार नही कर…. Is the given statement hateful?	0	yes
The following statement is in Hindi langauge and a non-native hindi annotated this as hateful: RT @muskanRai857600: सबसे प्यारा है मेरी माँ का प्यार सबसे दुलारा है मेरी माँ का प्यार लाभ न आये किसी माँ की आंख में आंसू ईश्वर हर माँ…. Is the given statement hateful?	0	no
The following statement is in Hindi langauge and a non-native hindi annotated this as hateful: बूथ पे जाओ मोदी लाइन लगी है @narendramodi_in @MLekhiOffice. Is the given statement hateful?	0	no.
The following statement is in Hindi langauge and a non-native hindi annotated this as hateful: तुम जैसे गाद्दर जब तक देश मे मौजूद हे तब तक इन नक्सलियों का आतंक जारी रहेगा जब तुम लोग जनता का विश्वास नही जीत पाये तो अब तुमने आतंकवाद ओर नक्सलियों का सहारा लेकर मोदिजी को बदनाम करना सुरु कर दिया।. Is the given statement hateful?	1	yes
The following statement is in Hindi langauge and a non-native hindi annotated this as hateful: RT @Anand_1226: कुछ दर्द ऐसे होते हैं, जिन्हें सिर्फ सह सकते हैं... किसी से कह नहीं सकते..!! #dil_ki_bat. Is the given statement hateful?	0	no.
The following statement is in Hindi langauge and a non-native hindi annotated this as hateful: गद्दारों की छाती पर चोट करके आया हूं राष्ट्रहित में वोट करके आया हूँ....🇮🇳😆 मैं भाजपा की ईमानदार सरकार को वोट करके आया हू https://t.co/aOni4GOiPB. Is the given statement hateful?	0	no.
The following statement is in Hindi langauge and a non-native hindi annotated this as hateful: RT @kalpeshjsolanki: गुजरात दलितों के लिए बना नर्क लगातार चौथे दिन घोडी चढने के मामले में दलितों पर जुल्म-अत्याचार। अभी ईस वक्त गुजरात…. Is the given statement hateful?	1	yes
The following statement is in Hindi langauge and a non-native hindi annotated this as hateful: @AkhileshPSingh तुम ससुर बुड़बक ही रहोगे ,अरे उ जहाज़वा है न उ बादलवा में छुप जाएगा तो कैसे दिखेगा बुड़बक. Is the given statement hateful?	0	yes.
The following statement is in Hindi langauge and a non-native hindi annotated this as hateful: @ashokgehlot51 जी @SachinPilot जी अब शराब बन्द कब कर रहे हो राजस्थान में ।नशा मुक्त कर दो राजस्थान को।. Is the given statement hateful?	0	no
The following statement is in Hindi langauge and a non-native hindi annotated this as hateful: मुर्खों से कौन बहस कर सकता है।. Is the given statement hateful?	0	no.
The following statement is in Hindi langauge and a non-native hindi annotated this as hateful: RT @KailashOnline: मीडिया ने देखा हिंसा का तांडव !!! #TMC ने आज देश के प्रमुख मीडिया को अपना असली चेहरा दिखा दिया! मतदाताओं को #BJP को वोट…. Is the given statement hateful?	1	no
The following statement is in Hindi langauge and a non-native hindi annotated this as hateful: RT @insa_jagriti: #SpiritualSunday12thMay @derasachasauda @Gurmeetramrahim इंसान जब सत्संग में आता है तो उसके बुरे कर्म ख़त्म होते चले जाते…. Is the given statement hateful?	0	no
The following statement is in Hindi langauge and a non-native hindi annotated this as hateful: पानी की कमी से संकट में मरीज डेंटल कॉलेज में टालनी पड़ी सर्जरी https://t.co/HsTuYezgzy. Is the given statement hateful?	0	no
The following statement is in Hindi langauge and a non-native hindi annotated this as hateful: RT @Great_Legion: जैसे तड़ीपार , मर्डर कर के सबूत मिटा देता है, वैसे ही @BJP4Gujarat भी अनपढ़ जाहिल की रडार टेक्नोलॉजी वाली डिलीट कर देते…. Is the given statement hateful?	0	yes
The following statement is in Hindi langauge and a non-native hindi annotated this as hateful: RT @RJDforIndia: जिसे हमारे सैन्य बल रडार समझ रहे थे वो DTH की छतरी निकली जो बादलों में काम नहीं करते! 😊 पूरे इंटरव्यू में बस 39वें सेकंड…. Is the given statement hateful?	0	no
The following statement is in Hindi langauge and a non-native hindi annotated this as hateful: RT @yadavdimples: @RahulGandhi भाजपा भी गजब पार्टी है: ◆ आतंकी इनकी साध्वी है ◆ आसाराम इनका संत है ◆ रामरहीम इनका गुरु है ◆ कुलदीप सेंगर इन…. Is the given statement hateful?	1	yes
The following statement is in Hindi langauge and a non-native hindi annotated this as hateful: RT @narendramodi_in: पाकिस्तान के पाले पोसे आतंकी जब यहां हमला करते थे तो ये निर्दोषों को जेलों में ठूंस देते थे। हिंदु आतंकवाद का कुतर्क…. Is the given statement hateful?	1	yes
The following statement is in Hindi langauge and a non-native hindi annotated this as hateful: ना आमिर औन ना सलमान-शाहरुख, करीना कपूर को ने बताया इस अभिनेता को सबसे बड़ा खान https://t.co/6mEZHEu0ia. Is the given statement hateful?	0	no
The following statement is in Hindi langauge and a non-native hindi annotated this as hateful: RT @MLArajeshSP: मुझे हराने वाला कोई पैदा नही हुआ, भगवान् के विधान को बदलने की ताकत है मुझमें - #निहुरवा ये सुनते ही मोदी ने #निरहुआ को जीत…. Is the given statement hateful?	0	no
The following statement is in Hindi langauge and a non-native hindi annotated this as hateful: RT @EvmAnti: Up में महागठबंधन ने जुमलो के बादलो के बीच स्ट्राइक कर दी और मोई जी के राडार को खबर भी न हुई https://t.co/SQ0Mjb1Crv. Is the given statement hateful?	1	no
The following statement is in Hindi langauge and a non-native hindi annotated this as hateful: RT @imsiddhu4u: 400 सीटें पाने के लिए और कितने लोगों को संघ से जोड़ोगे मोदी जी:- केजरीवाल…😂 https://t.co/HTv6jIJTzp. Is the given statement hateful?	0	no
The following statement is in Hindi langauge and a non-native hindi annotated this as hateful: RT @shakilpatel86: इलाहाबाद कमलानेहरू अस्पतालमें ट्यूमरसे जूझरही एकबच्ची निजी विमान छहसीटर होनेके वजहसे बच्चीऔर उसके मातापिताके साथ मोहम्मद…. Is the given statement hateful?	0	no
The following statement is in Hindi langauge and a non-native hindi annotated this as hateful: RT @NishiSi33227970: ट्वीट पे ट्वीट डालने का मतलब ये नहीं कि मै बेकार बैठी हुँ बस जुनून है " कांग्रेस के चोरो को जलील करने का " 😎😎😎😂…. Is the given statement hateful?	1	yes.
The following statement is in Hindi langauge and a non-native hindi annotated this as hateful: RT @Bhakt_namo_ka: ब्रिटेन सरकार का बडा खुलासा! लंदन मे वोटिंग भी कर चुके हैं राहुल गांधी,अब तो चुल्लू भर पानी मे डूब मरो चमचों!! अग्रिम श्…. Is the given statement hateful?	1	yes
The following statement is in Hindi langauge and a non-native hindi annotated this as hateful: RT @JhaGunjesh: "ऐसा होते हुए भी संघ (RSS) एक राजनीतिक दल या राजनीतिक दल का हिस्सा नहीं बनता। वह संपूर्ण समाज का संगठन ही है। यही है भारत…. Is the given statement hateful?	0	no
The following statement is in Hindi langauge and a non-native hindi annotated this as hateful: ये वह घटनाएं हैं, जिन्होंने राजस्थान को शर्मसार किया। इन्हें रोका जा सकता था लेकिन महिला सम्मान का ढोंग करने वाली कांग्रेस अपनी असफलता को छिपाने के बहाने ढूंढती रही और पीड़ितों की चीखों को अनसुना कर दिया। कभी वोट के लालच में तो में अपनी नाकामियों के उजागर होने के डर से। https://t.co/IvOVt98IDC. Is the g…	1	yes
The following statement is in Hindi langauge and a non-native hindi annotated this as hateful: RT @Miss_Ziddi110: चोर चोर मौसेरे भाई😂😂👈 इस वक्त इन दोनों की हालत ऐसी है जैसे #शराब पीने के बाद पति अपनी पत्नी को #एक्सप्लेन करता है कि उस…. Is the given statement hateful?	1	no
The following statement is in Hindi langauge and a non-native hindi annotated this as hateful: RT @agyani_dash: झुठे सुख को सुख कहे ये मान रहा मन मोद सकल चबीना काल का कुछ मुख में कुछ गोद http://t.co/NsTSG6Fott. Is the given statement hateful?	0	no.
The following statement is in Hindi langauge and a non-native hindi annotated this as hateful: RT @RavindraGautam_: स्वर्गीय राजीव गांधी को अपमानित करने के पीछे कहीं दिल्ली और पंजाब के चुनावों में सिख वोटों को साधने की जुगत तो नहीं…. Is the given statement hateful?	0	no.
The following statement is in Hindi langauge and a non-native hindi annotated this as hateful: @ashutosh83B मोदी का #मजाक उड़ाने वाले उड़ाते रह गए और #मोदी #पीएम बनकर #करोड़ों का #दिल #उड़ा ले गए🤗😉 तुम आज अपनी औकात देखो जलनखोर, चुल्लू भर पानी में डूब मरो😜. Is the given statement hateful?	1	yes
The following statement is in Hindi langauge and a non-native hindi annotated this as hateful: जो पूरे देश को जेब में लेकर घूम रहा उससे पूछा जा रहा कि क्या आप अपने जेब में बटुआ रखते है ?. Is the given statement hateful?	0	no.
The following statement is in Hindi langauge and a non-native hindi annotated this as hateful: RT @Mimansa_Zee: मसूद अज़हर अंतरराष्ट्रीय आतंकी घोषित, मसूद हाफ़िज़ भारत को कब सौंपेगा पाकिस्तान ? 2019 के सबसे बड़े नक्सली हमले का ‘सबसे ब…. Is the given statement hateful?	0	no
The following statement is in Hindi langauge and a non-native hindi annotated this as hateful: RT @Rekhta: हम आह भी करते हैं तो हो जाते हैं बदनाम वो क़त्ल भी करते हैं तो चर्चा नहीं होता ~अकबर इलाहाबादी. Is the given statement hateful?	0	no
The following statement is in Hindi langauge and a non-native hindi annotated this as hateful: कांग्रेस के लिए ये ऐसा ही है जैसे सिर मुड़ाते ओले पड़े.... https://t.co/ybY865QWEl. Is the given statement hateful?	1	no
The following statement is in Hindi langauge and a non-native hindi annotated this as hateful: RT @KusumDasi2: #SaturdayMotivation जहां संखों लहर मेहर की उपजै,कहर नहीं जहां कोई। दास गरीब अचल अविनाशी, सुख का सागर सोई।। असली भगति वेद शा…. Is the given statement hateful?	0	no
The following statement is in Hindi langauge and a non-native hindi annotated this as hateful: RT @Pinkimishr: अलवर गैंगरेप: मोदीजी की मायावती को चुनौती, 'सच्चे दलित हितैषी हैं तो, गहलोत सरकार से समर्थन वापस लें' दलित नहीं दौलत हितै…. Is the given statement hateful?	0	no
The following statement is in Hindi langauge and a non-native hindi annotated this as hateful: @yadav_sunil @narendramodi ,💯✔️✔️✔️ सुनील भाई जी 🙏🌷 खिलता रहेगा 👍👍. Is the given statement hateful?	0	no.
The following statement is in Hindi langauge and a non-native hindi annotated this as hateful: RT @Raghu__Charan: पतन का इससे बड़ा उदाहरण क्या होगा 85% हिंदुओ के बीच खड़ा मुसलमान उनकी बहन बेटियों की चड्डी का रंग बता रहा था और वो तालि…. Is the given statement hateful?	1	yes
The following statement is in Hindi langauge and a non-native hindi annotated this as hateful: RT @AdityadasSatlok: #दहेज_मुक्त_समाज का निर्माण संत रामपाल जी महाराज कर रहे है। अब तक 30,000 से अधिक दहेज, फिजूलखर्ची और आडंबर मुक्त विवाह…. Is the given statement hateful?	0	no
The following statement is in Hindi langauge and a non-native hindi annotated this as hateful: नहीं कोई बात होती फिर भी बात होती है, कुछ रिश्तों की ऐसे भी शुरुआत होती है !!. Is the given statement hateful?	0	no
The following statement is in Hindi langauge and a non-native hindi annotated this as hateful: 1 आदमीं को मारने पर गोडसे आतंकी हो सके है तो 17000 सिखो, 5000 भोपाली, 3000 तमिलों का कत्लेआम करवाने वाला भारत रत्न कैसे हो सके है?. Is the given statement hateful?	1	yes.
The following statement is in Hindi langauge and a non-native hindi annotated this as hateful: RT @Diyasin32915347: #BlackSpotOnJudiciary हरियाणा कि सरकार ने बहुत बड़ा घुन्हा किया है एक निर्दोष संत को उम्रकैद की सजा सुना कर जिस दिन ह…. Is the given statement hateful?	1	yes
The following statement is in Hindi langauge and a non-native hindi annotated this as hateful: @ChanchalMahour @narendramodi @ArvindKejriwal @RahulGandhi @sudhirchaudhary @akv2030 @editorrishi @atulking1234 @manish_singh_k @chchakanpuri वाह😍😍. Is the given statement hateful?	0	no.
The following statement is in Hindi langauge and a non-native hindi annotated this as hateful: RT @KapilMishra_IND: AAP ने तीन राज्यसभा बेची एक भी दलित को नहीं भेजा एकमात्र दलित मंत्री राजेन्द्र गौतम के सारे विभाग छीन लिए पार्टी की…. Is the given statement hateful?	1	no
The following statement is in Hindi langauge and a non-native hindi annotated this as hateful: RT @uN5hUMittal: @rssurjewala कहा से लाते हो इतना कमीनापन। तुम कांग्रेसी । MP , राजस्थान में हत्या , अपहरण, बलात्कार की बाड़ आ गयी है।…. Is the given statement hateful?	1	yes
The following statement is in Hindi langauge and a non-native hindi annotated this as hateful: RT @Dr_Uditraj: आज मुस्लिम समाज हिन्दू कालोनियों में किराये पर मकान नहीं ले पा रहा है , वैसा ही दलित के साथ भी हो रहा है | देश की इतनी ब…. Is the given statement hateful?	1	yes
The following statement is in Hindi langauge and a non-native hindi annotated this as hateful: RT @KailashOnline: विनाशकाले विपरीत बुद्धि !!! इंदौर के खजराना गणेशजी का अपमान करना भक्तों के साथ नाइंसाफी है! अब 19 मई को वोटिंग में इसका…. Is the given statement hateful?	0	no
The following statement is in Hindi langauge and a non-native hindi annotated this as hateful: RT @khan_boy_13: तो नीचता की सारी हदें पार करते हुए आज चोकीदार ने अलवर #बलात्कार कांड पे भी वोट मांग लिए 😭 शर्म आती है यार हद है मतलब. Is the given statement hateful?	1	yes
The following statement is in Hindi langauge and a non-native hindi annotated this as hateful: @SuntiaPandit हर हर महादेव. Is the given statement hateful?	0	no.
The following statement is in Hindi langauge and a non-native hindi annotated this as hateful: @bhatnagar2016 @MamtaBanarjee अबकी बार इसके लात लगनी जरूरी है. Is the given statement hateful?	0	no
The following statement is in Hindi langauge and a non-native hindi annotated this as hateful: RT @Lohia_Krishna_: चौकीदार को चोर कहने पर राहुल गाँधी ने 1 नहीं 2 बार नाक रगड़-रगड़कर माफी माँगी... अब बताओ फेंकू कौन..??😊 #मोदी_है_तो_मुम…. Is the given statement hateful?	0	no
The following statement is in Hindi langauge and a non-native hindi annotated this as hateful: RT @ombirlakota: कांग्रेस राज में राजस्थान में अराजकता का माहौल नजर आ रहा महिलाओं पर जुल्म हो रहा कही शादी के मंडप से दुल्हन का अपहरण कही प…. Is the given statement hateful?	1	no
The following statement is in Hindi langauge and a non-native hindi annotated this as hateful: RT @Aastha9305: मायावती ने मुसलमानों को #गद्दार कहा... हम कहते हैं तो बुरा क्यों मान जाते हैं??. Is the given statement hateful?	1	no
The following statement is in Hindi langauge and a non-native hindi annotated this as hateful: RT @VikrantShukla_: @DrKumarVishwas चोट करोगे कपूतों पर तो दर्द कहीं और से उठेगा 2014 से जनता के सामने वो सारे कपूत मुखर होकर आ गए लोकतंत्…. Is the given statement hateful?	1	yes
The following statement is in Hindi langauge and a non-native hindi annotated this as hateful: RT @AmitShah: मैंने सार्वजनिक जीवन में अरविन्द केजरीवाल जितना पाले बदलने वाला आदमी नहीं देखा। अन्ना को धोका देकर राजनीति में आ गये। सरका…. Is the given statement hateful?	1	no
The following statement is in Hindi langauge and a non-native hindi annotated this as hateful: RT @AnilMis93178388: @yadavdimples @RahulGandhi मतलब विपक्ष के नेता 5 साल से नहाए भी नही है, एक ही ड्रेस पहने घूम रहे है. Is the given statement hateful?	0	yes.
The following statement is in Hindi langauge and a non-native hindi annotated this as hateful: RT @BJP4India: बंगाल से ममता दीदी का जाना सुनिश्चित हो गया है। 23 मई के बाद बंगाल के अंदर परिवर्तन का सूर्योदय होने वाला है: श्री अमित शाह…. Is the given statement hateful?	0	no.
The following statement is in Hindi langauge and a non-native hindi annotated this as hateful: RT @aruneshDas2: #Allah_Kabir पूर्ण ब्रह्म कबीर साहिब चारों युग परवान झूठे गुरुवा मर गए हो गए भूत मसान परमात्मा कबीर साहेब चारों युगों…. Is the given statement hateful?	0	no.
The following statement is in Hindi langauge and a non-native hindi annotated this as hateful: RT @mona025011: @KumariKanika1 @rcnsmlk @SomaDalal तुम्हे कौन गैर कह रहा है. लो कर लो बात. Is the given statement hateful?	0	no.
The following statement is in Hindi langauge and a non-native hindi annotated this as hateful: BJP4India: तब तो बबुआ भी बुआ के उस घोटाले की जांच कराने के ऐलान करके गए थे। लेकिन हुआ क्या? बुआ और बबुआ ने आज खुद हाथ मिला लिया है। यही इनकी सच्चाई है: पीएम #MeraVoteModiKo https://t.co/eSEDXqMo1N https://t.co/W8CqfEDFpt. Is the given statement hateful?	0	no
The following statement is in Hindi langauge and a non-native hindi annotated this as hateful: RT @Jekki_KHaN_786: दुनिया का दोगलापन इस तस्वीर से नजर आता है अगर यही तस्वीरें मुस्लिम समुदाय के बच्चों की होती वर्ल्ड की मीडिया और एजें…. Is the given statement hateful?	1	no
The following statement is in Hindi langauge and a non-native hindi annotated this as hateful: @chowkid87435826 @karanslove @Sampat_Saral @sardanarohit @vinodkapri @sakshijoshii @khanumarfa @zoo_bear @umashankarsingh @bainjal @jainendrakumar @MamataOfficial @msisodia @pankhuripathak मोदी तो चोर है इसमें कोई किन्तु परंतु नहीं है रोहिंगिया या बंगला देशी मुस्लिम ही क्यू बंगला देशी हिन्दू को भी बाहर …	1	yes
The following statement is in Hindi langauge and a non-native hindi annotated this as hateful: RT @NagarJitendra: ये पप्पुलाल चुनाव के अंतिम चरणों मे भी कॉमेडी करने से नही चुकेगा.!! दुनिया अंगुली दिखाती है, ये पुरा हाथ दिखा रहा है.!!…. Is the given statement hateful?	0	no
The following statement is in Hindi langauge and a non-native hindi annotated this as hateful: RT @sachinmaurya850: लाख समझाया की दुनिया शक करती है … पर, उसकी आदत नहीं गयी, मुस्करा के गुजरने की…. Is the given statement hateful?	0	no.
The following statement is in Hindi langauge and a non-native hindi annotated this as hateful: RT @Bsharma7: ये है दिल्ली के बलविंदर सिंह अंकल, 84 नरसंहार में इन्होंने अपना सबकुछ खो दिया, इनकी सारी संपत्ति जल गई थी और वह सड़क पर आ गए,…. Is the given statement hateful?	0	no
The following statement is in Hindi langauge and a non-native hindi annotated this as hateful: @DHARMEN012 @VeerLotus किसी ने नहीं माना है बस गुलामो को छोङ कर. Is the given statement hateful?	0	no
The following statement is in Hindi langauge and a non-native hindi annotated this as hateful: कुछ लोग अपने देश को भी अपनी मा समझते तो शायद देश मैं कभी आतंक ओर हिंसा ना हो। क्यूंकि भारत माता के पुत्र से जायदा दुश्मन ब्रहे हुए है। #happymothersday. Is the given statement hateful?	0	no
The following statement is in Hindi langauge and a non-native hindi annotated this as hateful: RT @rukasa007: मेजर प्रवीण और सूबेदार पवार का यह बयान सैन्य न्यायालय के रिकार्ड में दर्ज है यही वजह है कि सेना ले.कर्नल पुरोहित को निर्दोष…. Is the given statement hateful?	0	no
The following statement is in Hindi langauge and a non-native hindi annotated this as hateful: @dhruv_rathee कोई इनको समजाओ की वोह रडार है कोई टाटा स्काई का सेट अप बॉक्स नहीं जो बादल और बारिश में काम ना करें...... Is the given statement hateful?	0	no.
The following statement is in Hindi langauge and a non-native hindi annotated this as hateful: Breaking News बीबीसी और इंडिया टुडे द्वारा कराए गए ताज़ा राष्ट्रीय एग्जिट पोल के मुताबिक: कांग्रेस को 300 सीटे आ रही हैं ! 40 लोकसभा से और 260 गुप्ता टेंट हाउस से !. Is the given statement hateful?	1	no
The following statement is in Hindi langauge and a non-native hindi annotated this as hateful: @yadavakhilesh BJP के साथ यही होना चाहिये था । रडार से अब डर लग रहा है। तब नहीं सोचा जब "रफैल को दो पायलट से ऐक पायलट वाला बना कर भ्रष्टाचार किया" दो पायलट होते तो ऐक पाकिस्तानी रडार पर नजर रख लेता और ऐक रफैल उडा़ता। पर भ्रष्ट लोग हैं सब। अंबानी को पैसे मिल जायें बस, देश जाये भाड़ में।. Is the given sta…	1	yes
The following statement is in Hindi langauge and a non-native hindi annotated this as hateful: कोई नहीं मिला तो मैं आ जाता हूँ. Is the given statement hateful?	0	no
The following statement is in Hindi langauge and a non-native hindi annotated this as hateful: @ashokgehlot51 अपनी माँ को कोई भी डाकण नही कहता है । जनता वही है, देश वही है, कांग्रेस पार्टी जिसका पुरे भारत में एक छत्र राज था, पिछले चुनाव में 44 पर टिकी और अब कितनी छलांग लगाती है, 23 मई को सामने आ जायेगा ।इसके लिए मोदी जिम्मेवार है तो बीजेपी के लिए गर्व की बात है । राहुल की कमी नही है ।. Is the giv…	0	no
The following statement is in Hindi langauge and a non-native hindi annotated this as hateful: @YasminKidwai @Javedakhtarjadu और बुर्क़े मे आतंकबादी आकर अगर तुम्हें थोक दे तो क्या लोजिक के किदवई अना. Is the given statement hateful?	1	yes.
The following statement is in Hindi langauge and a non-native hindi annotated this as hateful: RT @SureshK89551417: 72,हूरें ,,72 हजार , 72 घण्टे,,72वर्ष ऐसा लगता है जैसे 72 वाला आसमानी किताब का ये अंक ,, हमारे देश के कुछ सेकुलर भाँ…. Is the given statement hateful?	1	yes.
The following statement is in Hindi langauge and a non-native hindi annotated this as hateful: चुनाव आयोग व बीएसएफ़ की भूमिका संदिग्ध, EC मोदी के लिए यह सबकुछ कर रहा है : SC के वकील नितिन मेश्राम https://t.co/orrZp1BMxI https://t.co/DPkG6Jl5qS. Is the given statement hateful?	0	no.
The following statement is in Hindi langauge and a non-native hindi annotated this as hateful: RT @SumanSh58123278: हिंदू मंदिर में जाने पर इसको धर्मनिरपेक्षता का दौरा पड़ जाता है, मस्जिद जाने की औकात ही नहीं है,मस्जिद तो इस्लामी होती…. Is the given statement hateful?	1	no
The following statement is in Hindi langauge and a non-native hindi annotated this as hateful: @AgrwalRani @Bhakt_namo_ka दुनिया में सारे फ़साद की जड सिर्फ सुन्नी मुसलमान है, सिर्फ और सिर्फ उनको निपटाना चाहिए उसके बाद दुनिया में शांति ही शांति होगी. Is the given statement hateful?	1	yes
The following statement is in Hindi langauge and a non-native hindi annotated this as hateful: अर्ज किया है "मत फेंको इतना कि बादलों में छेद हो जाए क्या पता .... तुम भेजो यहाँ से प्लेन, वो रेडार में कैद जाए" #EntireCloudCover. Is the given statement hateful?	0	no
The following statement is in Hindi langauge and a non-native hindi annotated this as hateful: RT @SudhinBhadoria: मोदीजी आप को आज तक मजबूरन, दलित छात्र रोहित वेमुला की आत्महत्या का दर्द नही समझ में आया,नजीब जो 2 वर्षों से घर और कॉलेज…. Is the given statement hateful?	1	no
The following statement is in Hindi langauge and a non-native hindi annotated this as hateful: RT @MajorPoonia: क्रान्तिकारी राजनीति ! वेस्ट दिल्ली के AAP उम्मीदवार के सुपुत्र कह रहे हैं- “6 करोड़ में लोकसभा टिकट बेचा केजरीवाल ने” !…. Is the given statement hateful?	0	yes
The following statement is in Hindi langauge and a non-native hindi annotated this as hateful: @pankhuripathak जब कुछ समझ मे न आये तो @BJP4India के चप्पल मार दो!. Is the given statement hateful?	1	yes
The following statement is in Hindi langauge and a non-native hindi annotated this as hateful: RT @Vaishaly_patil: एक गुजराती ठग ने पहले चाय बेची, फिर मगरमच्छ पकड़ा, फिर 35 साल भिक्षा मांग कर जीवन यापन किया। फिर दिल्ली से MA किया,…. Is the given statement hateful?	1	yes
The following statement is in Hindi langauge and a non-native hindi annotated this as hateful: RT @INCUttarPradesh: अमेठी के लोक देवता बाबा परवन तिवारी की पूजा अर्चना व सबकी खुशहाली की कामना करती कांग्रेस महासचिव श्रीमती @priyankagand…. Is the given statement hateful?	0	no.
The following statement is in Hindi langauge and a non-native hindi annotated this as hateful: RT @LalitMa54440950: जिसकी पत्नी नहीं है वो भगवान राम के पास जा कर क्या करेंगे झूठे लोगो का भगवान राम के पास कोई जगह नहीं है इसलिए भारतीय भ…. Is the given statement hateful?	0	yes
The following statement is in Hindi langauge and a non-native hindi annotated this as hateful: RT @rcgarg7: @ArvindKejriwal सड़ जी काठ की हांडी दुबारा नही चढ़ती बहुत हो गया तसल्ली कर लो यू समझो अंधे के हाँथ बटेर लग गए उसको हक न समझो. Is the given statement hateful?	0	yes
The following statement is in Hindi langauge and a non-native hindi annotated this as hateful: RT @SShaileshr71: @RubikaLiyaquat ये कांग्रेसी पिद्दी मोदी जी के विरोध में इतने अंधे हो चुके हैं कि देश जाए भाड़ में हमें तो शिर्फ़ मोदी का…. Is the given statement hateful?	1	yes
The following statement is in Hindi langauge and a non-native hindi annotated this as hateful: RT @NagarJitendra: लोग समझदार है, कहने की जरुरत नही है। इन्होने #जिंद मे भी लोकतंत्र मजबुत किया है। बस पप्पु का ध्यान रखना, दुनिया मोदी मो…. Is the given statement hateful?	0	no
The following statement is in Hindi langauge and a non-native hindi annotated this as hateful: RT @aamrapali108: एक दिन ऐसा आएगा हम नेक हृदय वाले हिन्दू सोये होंगे और ये 5 बार मस्जिद में माइक लगा के अजान करने वाले हमे चैन से सोने भी…. Is the given statement hateful?	1	no
The following statement is in Hindi langauge and a non-native hindi annotated this as hateful: @ashutosh83B ये तो उन अनपढ़ , गवारो ओर झाहिलो को समझना होगा। जो बालाकोट के ऊपर सबूत मांग रहे थे।ओर अब भी सेना के ऊपर प्रश्न लगा रहे है।मूर्खो को भी ये बात समझ आ जायेगी की अगर कोई विमान नीचे उड़े तो राडार तो नही पकड़ेगा। लेकिन आँखे उसको पकड़ सकती है। पत्रकार इतना अनपढ़ होगा सोचा नही था कभी।. Is the given…	1	yes
The following statement is in Hindi langauge and a non-native hindi annotated this as hateful: RT @atulkanakk: लोग भी यों ही बात का बतंगड़ बना देते हैं/ अब कोई मूँगफली बेचने के लिए तो राजनीति में नहीं आता ना! 🤣 https://t.co/yLTAb7y8Jv. Is the given statement hateful?	0	no.
The following statement is in Hindi langauge and a non-native hindi annotated this as hateful: ए जेलर बाबू.. तनी देखिए त.. ई कैदी न० 420 के नाम पे के ट्वीटिया रहा है।. Is the given statement hateful?	0	no.
The following statement is in Hindi langauge and a non-native hindi annotated this as hateful: RT @AnkitLal: अब तो बस यही बचा है कि मोदी जी बोले कि उन्होंने हर जहाज पर खुद जाकर काला टीका लगाया था ताकि दुश्मन की बुरी नज़र से बच सके। ज…. Is the given statement hateful?	0	no
The following statement is in Hindi langauge and a non-native hindi annotated this as hateful: भारतिय सेना से दुश्मन देश थर- थर कांपती है तो देश अन्दर का दुश्मन की क्या औकाद की भारतिय सेना के सामने चुनाव लङ पाती। तेज बहादुर जिन्दाबाद तु ने साबित कर दिया की चुनाव आयोग किसी एक पार्टी की भङवा बन गई है। देश खतरे में है जनता का भविष्य भी अंधकार ही होगा।. Is the given statement hateful?	1	yes
The following statement is in Hindi langauge and a non-native hindi annotated this as hateful: RT @Saumya_Sweety: प्रकाश अम्बेडकर ने पहले ही कहा था कि हम सत्ता में आये तो चुनाव आयुक्त को जेल भेजा जाएगा. उस समय हंसी आ रही थी पर अब लग…. Is the given statement hateful?	0	no
The following statement is in Hindi langauge and a non-native hindi annotated this as hateful: RT @BJPLive: ये कितने भी हवन करा दें, ये कितने भी जनेऊ दिखा दें, पुलिस को भगवा ड्रेस भी सिलवा दें, लेकिन भगवा में जो आतंक के दाग लगाने की इ…. Is the given statement hateful?	1	yes
The following statement is in Hindi langauge and a non-native hindi annotated this as hateful: RT @bqPPYmyzm3jjXTB: आजाद भारत का पहला आतंकवादी हिन्दू था और उसका नाम नाथूराम गोडसे है: कमल हासन... सूअर+गीदड़ों की मिक्स और नाजायज औलाद कम…. Is the given statement hateful?	1	yes.
The following statement is in Hindi langauge and a non-native hindi annotated this as hateful: RT @mitalishah121: एक बाबरी ढाचा टूटी थी मुसलमान आज तक भाजपा को वोट नहीं देता। लाखों मंदिर कांग्रेस ने तुड़वाए फिर भी हिंदू समझते नहीं।।. Is the given statement hateful?	1	yes
The following statement is in Hindi langauge and a non-native hindi annotated this as hateful: RT @Mayawati: और अभी हाल में इनका जनविरोधी अहंकार इतना सर चढ़कर बोला कि इन्होंने बंगाल में तृणमूल कांग्रेस के 40 विधायक तोड़कर ममता बनर्जी…. Is the given statement hateful?	0	no
The following statement is in Hindi langauge and a non-native hindi annotated this as hateful: @Its_Dangerous1 @dcchoudhary197 अब हो गई तो हो गई. Is the given statement hateful?	0	no.
The following statement is in Hindi langauge and a non-native hindi annotated this as hateful: दिल मेरे तु दिवाना है पागल हे मेने माना है 😘😘😘😂😂. Is the given statement hateful?	0	no.
The following statement is in Hindi langauge and a non-native hindi annotated this as hateful: RT @INCMP: कुछ तो शर्म करो : - जीएसटी और नोटबंदी से धंधा चौपट करने वालों - किसानों के साथ धोखा करने वालों - जनता के टैक्स का पैसा विज्ञाप…. Is the given statement hateful?	1	no
The following statement is in Hindi langauge and a non-native hindi annotated this as hateful: RT @akhileshsharma1: चुनाव आयोग ने यह अच्छा किया कि दिल्ली में मतदान शुक्रवार या सोमवार को नहीं बल्कि रविवार को रखा। यह जरूर है कि शिमला-म…. Is the given statement hateful?	0	no
The following statement is in Hindi langauge and a non-native hindi annotated this as hateful: RT @Habib_Hasan_: भक्तो ये मोदी की जीत नहीं ये तुम्हारे जीजा की वजह से मसूद अजहर आतंकवादी घोषित हुआ इन्हे कहते हैं देश भक्त,SIR आपने कलाम…. Is the given statement hateful?	1	no
The following statement is in Hindi langauge and a non-native hindi annotated this as hateful: RT @chote_millu143: *अमेठी की जनता की राय* https://t.co/OL31B5uLET. Is the given statement hateful?	0	no.
The following statement is in Hindi langauge and a non-native hindi annotated this as hateful: RT @Republic_Bharat: कांग्रेस की कर्ज माफी स्कीम की खुली पोल, मध्य प्रदेश के गुना में ज्योतिरादित्य सिंधिया के सामने भड़के किसान - देखें VI…. Is the given statement hateful?	1	no
The following statement is in Hindi langauge and a non-native hindi annotated this as hateful: @Goldenthrust क्योंकि वह स्वयं को उनके मज़हब के प्रति आस्थावान दिखाना चाहता है या हो सकता है यह "हलाला" की पैदाइश ही हो ।. Is the given statement hateful?	0	no
The following statement is in Hindi langauge and a non-native hindi annotated this as hateful: भूखा मर गया बहादुरी बिना दिखाये रावण का साथ भी मिल गया था अब बस केवल रोने वालो की औकात देखना हाय सब मोदी ने कर डाला. Is the given statement hateful?	0	yes
The following statement is in Hindi langauge and a non-native hindi annotated this as hateful: ॐ श्री अनंत हरि प्रकाशात्मा. Is the given statement hateful?	0	no.
The following statement is in Hindi langauge and a non-native hindi annotated this as hateful: चप्पल तो बीजेपी वालो को लगने वाली हैं 23 मई को. Is the given statement hateful?	1	no.
The following statement is in Hindi langauge and a non-native hindi annotated this as hateful: @ANI यह जिंदा है अभी ?????. Is the given statement hateful?	0	no.
The following statement is in Hindi langauge and a non-native hindi annotated this as hateful: RT @SumanSh58123278: पैट्रोल इतना महंगा था कि,,,🤔 स्कूटी बेचकर, कुत्ता गाड़ी ले ली .. . ओर कुत्तो की जगह दस इतालवी लूटेरी और उसकी औलादो के…. Is the given statement hateful?	1	yes
The following statement is in Hindi langauge and a non-native hindi annotated this as hateful: हिन्दुओं कब समझोगे पहले ही पाकिस्तान खो दिया अब हिन्दुस्तान मत खोना. Is the given statement hateful?	1	yes
The following statement is in Hindi langauge and a non-native hindi annotated this as hateful: RT @BebakAawaj: @yadavakhilesh भाजपा को इस समय वोट चाहिए वो भी जनता को जाती-धर्म नेहरू-राजीव गांधी का नाम लेकर... देश की समस्याओं पर अगर…. Is the given statement hateful?	1	no
The following statement is in Hindi langauge and a non-native hindi annotated this as hateful: Ch_jiyaa Sona hai ya jagna hai 🤔. Is the given statement hateful?	0	no.
The following statement is in Hindi langauge and a non-native hindi annotated this as hateful: @Yogita_singh11 नकली गाँधियों की तरह अपने बाप के नाम पर जीने वाले सिर्फ कुत्ते होते हैं, और कुत्तों को भोंकने के अलावा कोई काम नहीं होता। राजस्थानी के नाम पर कलंक, गद्दारों के जूते चाटने वाले वही राजस्थानी हैं जिन्होंने मुगलों का साथ देकर अपने ही भाइयों को मरवाया था।. Is the given statement hateful?	1	yes
The following statement is in Hindi langauge and a non-native hindi annotated this as hateful: RT @agrwal_akhil: ये कश्मीर नहीं ये पश्चिम बंगाल जहाँ #TMC के गुंडे हिंदू नागरिकों पर पत्थर चला रहे जिससे वो वोट ना कर सके #MamataBanerjee…. Is the given statement hateful?	1	yes
The following statement is in Hindi langauge and a non-native hindi annotated this as hateful: RT @Activelado: जरा सी बात करनी बंद क्या की पुराने दोस्तों ने धीरे-धीरे साथ छोड़ दिया ऐसा लगता है, जैसे.... मेरे बात बंद करने का ही इंतज़ार…. Is the given statement hateful?	0	no
The following statement is in Hindi langauge and a non-native hindi annotated this as hateful: @MPMadanSaini जहाँ चुनाव होना बाकि हो और अपने रिस्तेदार हो तो उन्हें ये बताए. अगर हमारे समाज ने मोदी जी को ज्यादा से ज्यादा संख्या में वोट नही दिया तो विधर्मी *बांग्लादेशी मुसलमान और रोहिंग्या मुसलमान* कुछ ऐसा हाल करेंगे जैसा वे कोलकत्ता में कर रहे हैं।अभी भी वक्त है जाग जाओ! घरों से निकलो👇. Is the give…	1	yes
The following statement is in Hindi langauge and a non-native hindi annotated this as hateful: RT @GSatusingh: @RahulGandhi देश के अगले प्रधानमंत्री राहुल गांधी जिंदाबाद राहुल गांधी जिंदाबाद राहुल गांधी जिंदाबाद राहुल गांधी जिंदाबाद…. Is the given statement hateful?	0	yes
The following statement is in Hindi langauge and a non-native hindi annotated this as hateful: RT @shuklapinku: श्रीलंका में पहले बुरका बैन, फिर नकाब बैन उसके बाद अब विदेशी मौलानाओं को देश छोड़ने के लिए कहते हुए धमकी दी है कि निकल जाओ…. Is the given statement hateful?	1	no
The following statement is in Hindi langauge and a non-native hindi annotated this as hateful: RT @JhaManyu1984: 84 के दंगे मे सिख मरते गए बेटियों का बलात्कार होता रहा गुरुद्वारे जलता रहे पर कुछ सीख बेशर्म सिख पापी काँग्रेस को वोट दे…. Is the given statement hateful?	1	yes
The following statement is in Hindi langauge and a non-native hindi annotated this as hateful: #IPL2019Final is baar umpire Kahan bechne hai?. Is the given statement hateful?	0	no.
The following statement is in Hindi langauge and a non-native hindi annotated this as hateful: RT @Randhirkush: #WednesdayMotivation 33 करोड़ देवी देवताओं की आप चाहे जितने भी भक्ति कर ले इनमें से किसी भी देवता में इतनी पावर नहीं है जो…. Is the given statement hateful?	1	no.
The following statement is in Hindi langauge and a non-native hindi annotated this as hateful: कांग्रेस MC नेर चौक में करेगी सर्जिकल स्ट्राइक- BJP चेयरमैन &amp; वाईस चैयरमैन की होगी छुट्टी। कांग्रेस लायेगी अविश्वास प्रस्ताव- Advance News Himachal Buero https://t.co/OxqNPqfBkR. Is the given statement hateful?	0	no
The following statement is in Hindi langauge and a non-native hindi annotated this as hateful: भ्रष्ट राजनेताओं का काला चेहरा उजागर करने वाले ईमानदार पत्रकारों की हत्या कर दी जाती है। जनाब यहां सच बोलने की यही सजा मिलती है। https://t.co/Pcr8PGN96D. Is the given statement hateful?	0	yes
The following statement is in Hindi langauge and a non-native hindi annotated this as hateful: RT @Kirtishbhat: ये इंटरव्यू लेने वाले जब ब्रेक लेते है उस वक़्त बाथरूम में जा जाकर हँस कर आते होंगे.. Is the given statement hateful?	0	no
The following statement is in Hindi langauge and a non-native hindi annotated this as hateful: RT @Priyankajit: भक्तों के अनुसार :----- वही सैनिक देशभक्त माना जाएगा जो चुपचाप ताबूत मे बंद होकर घर आएगा वह नहीं :-- जो भ्रष्…. Is the given statement hateful?	1	no
The following statement is in Hindi langauge and a non-native hindi annotated this as hateful: RT @savita_aap: जिस पार्टी और उसके नेता ज़मीनी हकीकत से जुड़े हो और असल मुद्दे उठाते हो ऐसे नेता ही अब देश की उम्मीद है। उत्तर पूर्वी लोकस…. Is the given statement hateful?	0	no
The following statement is in Hindi langauge and a non-native hindi annotated this as hateful: RT @pargyadidi: लाहौर,मस्जिद में फटा बम कम से कम 40 मरे। "बमजान मुबारक". Is the given statement hateful?	1	yes.
The following statement is in Hindi langauge and a non-native hindi annotated this as hateful: RT @Prerna22845841: 💞रोशन है तेरे दम से मेरे इश्क का जहां जो बात तुझमें है वो किसी और में कहां💞 https://t.co/eoI73vK9Nd. Is the given statement hateful?	0	no
The following statement is in Hindi langauge and a non-native hindi annotated this as hateful: RT @BJP4India: हाल हीं में श्रीलंका में जो बम धमाके हुए थे उसके बाद वहां की सरकार ने जाकिर नाइक के टीवी चैनल पर बैन लगाने का फैसला किया है।…. Is the given statement hateful?	0	no
The following statement is in Hindi langauge and a non-native hindi annotated this as hateful: RT @OfficeofSSC: @ChouhanShivraj झूठ बोले कौवा काटे, राहुल बाबा काले कौवे से डरियो। कर्ज़ माफ किया नहीं और अब कह रहे हैं कि 72 हज़ार दे दें…. Is the given statement hateful?	0	yes
The following statement is in Hindi langauge and a non-native hindi annotated this as hateful: @AtharSky92 @ashutosh83B ओले 😁😁. Is the given statement hateful?	0	no.
The following statement is in Hindi langauge and a non-native hindi annotated this as hateful: RT @The_Hot_Summer: अगर अब किसी ने मुझे डीएम में आने को कहा या डीएम में घुस कर बकवास करने की कोशिश करी तो उसके बाद हुए हश्र के ज़िम्मेदार आ…. Is the given statement hateful?	1	yes
The following statement is in Hindi langauge and a non-native hindi annotated this as hateful: हालत ये है कि आदमी रात मे लघुशंका के लिए भी उठ रहा है, तो कांग्रेस के खिलाफ तीन चार पोस्ट डालकर ही सोता है 😜🤣😂 @ShilpiSinghINC. Is the given statement hateful?	1	no.
The following statement is in Hindi langauge and a non-native hindi annotated this as hateful: RT @ShivrajKaBhanja: गुंडे से याद आया, संजय जी, दिल्ली का जो गुंडा 2014 में मोदीजी से हारा था, वो इसबार वाराणसी से क्यों नही लड़ रहा? फट गई…. Is the given statement hateful?	1	yes
The following statement is in Hindi langauge and a non-native hindi annotated this as hateful: @Priyankajit भाजपा का यह ढंग है 100 में से 90 बेईमान फिर भी भारत देश महान. Is the given statement hateful?	1	no
The following statement is in Hindi langauge and a non-native hindi annotated this as hateful: @ModiLeDubega बेशरम नहीं तो भाजपा नहीं बेशरम नहीं तो संघी नहीं बात ख़तम. Is the given statement hateful?	1	yes
The following statement is in Hindi langauge and a non-native hindi annotated this as hateful: RT @mitalishah121: श्रीलंका की मस्जिदों में इतने हथियार निकल रहे हैं जबकि वहाँ पे मुसलमानों की संख्या 9.7% है हमारे देश में क्या हालात…. Is the given statement hateful?	1	no
The following statement is in Hindi langauge and a non-native hindi annotated this as hateful: @SandhyaDasi8 दुष्यंत चौटाला जी को 5 साल बाद समझ आ ही गया कि बरवाला में जो नरसंहार हुआ उसके लिए दोषी हरियाणा की भाजपा सरकार है..दुष्यंत जी भाजपा ने जो किया उसका खामियाजा तो उसको भुगतना ही पड़ेगा लेकिन 5 साल तक जो लोग सच जानते हुए भी चुप रहे जनता उन्हें भी कभी माफ़ नहीं कर. Is the given statement hateful?	0	yes
The following statement is in Hindi langauge and a non-native hindi annotated this as hateful: @ZeeNewsHindi ये लोगों का यह नौटंकी है, सिर्फ बीजेपी को जलील करने की.. Is the given statement hateful?	1	yes
The following statement is in Hindi langauge and a non-native hindi annotated this as hateful: RT @manojkjhadu: बेशर्म बड़बोलेपन की कोई हद नहीं...उड़ी, पठानकोट और पुलवामा के बाद भी मान्यवर @narendramodi ji अयोध्या में कहते हैं 2014 के…. Is the given statement hateful?	0	no.
The following statement is in Hindi langauge and a non-native hindi annotated this as hateful: @i_theindian @RahulGandhi भाजपा भी गजब पार्टी है: ◆ आतंकी इनकी साध्वी है ◆ आसाराम इनका संत है ◆ रामरहीम इनका गुरु है ◆ कुलदीप सेंगर इनका नेता है ◆ तड़ीपार इनका अध्यक्ष है ◆ दंगायी इनका लौह पुरुष है ◆ कायर सावरकर इनका वीर है ◆ हर आतंकी के लिए भाजपा मे जगह है #23_मई_भाजपा_गई. Is the given statement hatefu…	1	yes
The following statement is in Hindi langauge and a non-native hindi annotated this as hateful: @narendramodi Tu Nazar araha hai Kya aasman me. Is the given statement hateful?	0	no.
The following statement is in Hindi langauge and a non-native hindi annotated this as hateful: RT @KapilMishra_IND: नहीं @RubikaLiyaquat बहन वीडियो में प्रियंका गाली रुकवा नहीं रहीं, रुकवाने की नौटंकी कर रही हैं भद्दी गाली पर जिस…. Is the given statement hateful?	0	yes
The following statement is in Hindi langauge and a non-native hindi annotated this as hateful: लो जी मिल गया हिन्दू आतंकवादी 👇👇 https://t.co/gCeC5jjisI. Is the given statement hateful?	1	yes
The following statement is in Hindi langauge and a non-native hindi annotated this as hateful: RT @Dharmraj7265: CRPF के डीजी का बयान- बंगाल की जनता खूलकर करें मतदान जहां मिलेंगे ममता के गुंडे वहीं कर देंगे, उनका काम तमाम!. Is the given statement hateful?	1	yes
The following statement is in Hindi langauge and a non-native hindi annotated this as hateful: RT @keshavyadaviyc: वोट देने से पहले याद रखे शहीदों का अपमान करने वाली पार्टी बीजेपी और उसके उम्मीदवारो को मुँह की खिलानी है। #BhopalLoksa…. Is the given statement hateful?	1	yes
The following statement is in Hindi langauge and a non-native hindi annotated this as hateful: RT @Bhumika__1: जैसे शरीर मरने के बाद आत्मा इधर-उधर भटकती रहती हैं..... ठीक , उसी प्रकार 23 मई को कांग्रेस अंतिम सांस लेगी, और उसकी आत्मा…. Is the given statement hateful?	1	no
The following statement is in Hindi langauge and a non-native hindi annotated this as hateful: RT @preeti_chobey: बहुत ही दुखद खबर, लेकिन देश का चौकीदार चुंनाव प्रचार में व्यस्त है,साहेब ने तो कहा था ,नोटबन्दी से नक्सलवाद की कमर टूट…. Is the given statement hateful?	1	no.
The following statement is in Hindi langauge and a non-native hindi annotated this as hateful: @singhharvindra @Arun2981 @ArvindKejriwal अकाली-बीजेपी ने पंजाब को धर्म पर बांटने के लिए 30 बार गुरु ग्रंथ साहिब जी की बेअदबी करवाई, 56 बार गुटका साहिब की, 22 बार हिन्दू ग्रंथो की। मैं हैरान हूं तुम लोग अभी तक बचे कैसे हो। https://t.co/VVunIpU6oH. Is the given statement hateful?	1	yes.
The following statement is in Hindi langauge and a non-native hindi annotated this as hateful: RT @sureshgoyal24: हा... हा... इधर सेम पित्रोदा पार्टी की छीछालेदार करवा रहा था उधर हमारे कुछ चोटि के निष्पक्ष पत्रकार इस चिन्ता में दुब…. Is the given statement hateful?	1	no.
The following statement is in Hindi langauge and a non-native hindi annotated this as hateful: ममता के बंगाल मे जब इतनी मार पीट चुनाव के दौरान होती है तो वहाँ राष्ट्रपति शासन लगा कर चुनाव कराना चाहिए।लोगों को मार कर लोकतंत्र ला रही है ममता।चुनाव के समय राष्ट्रपति का ही शासन पूरे देश में होना चाहिए ।. Is the given statement hateful?	1	no
The following statement is in Hindi langauge and a non-native hindi annotated this as hateful: RT @AjayKum13838284: दोस्तों आज मैं एक जमीनी हकीकत बताता हूँ यहाँ बहुतो ऐसे लोग है जो दोहरी नागरिकता लेकर 2-2 राज्यो में सरकारी फायदा उठाते…. Is the given statement hateful?	1	no
The following statement is in Hindi langauge and a non-native hindi annotated this as hateful: @ArvindKejriwal Pehle jaake EC response sun lijiye fir bakiye @ArvindKejriwal. Is the given statement hateful?	0	no.
The following statement is in Hindi langauge and a non-native hindi annotated this as hateful: @laluprasadrjd हा तो एक बात बताओ 5 साल के अंदर न कोई दंगा हुआ नही कोई देश के अंदर कोई बम विस्फोट हुआ भाई लोग असलियत यही की यही लोग जातिवाद के नाम पर जहर उगलेंगे और जितने भी मुसलमान भाई है 2004 और 2004 के बाद में बिहार में अंतर देख तब किसी को सपोर्ट करो ये सब सिर्फ आपलोगो को वोट बैंक समझते है. Is the giv…	0	yes
The following statement is in Hindi langauge and a non-native hindi annotated this as hateful: RT @sambit_swaraj1: राजनीति के दंगल में अगर एक पार्टी 'चौकीदार चोर है' ट्रेंड करवा रही है और सोच रही है कि इस पर पलटवार नहीं होगा तो यह उन…. Is the given statement hateful?	1	no
The following statement is in Hindi langauge and a non-native hindi annotated this as hateful: @jayantrld नागपुर से जारी Whatsapp msg , भक्तों की दलील और जिल्लेइलाही के भाषण या साक्षात्कार तीनों में लेशमात्र भी फ़र्क़ नजर नही आता 😀😀. Is the given statement hateful?	1	no.
The following statement is in Hindi langauge and a non-native hindi annotated this as hateful: RT @uN5hUMittal: @Meenakshi7771 बताओ चमचो को कोई और काम ही नही है। मोदी जी के कपड़े गिनने के सिवा। । लगे रहो ऐसे ही।।. Is the given statement hateful?	1	yes
The following statement is in Hindi langauge and a non-native hindi annotated this as hateful: @the_hindu Communist मानसिकता है इसकी, देश में इनके जैसे लोग हो तो देश को बाहर के दुश्मनों की जरूरत है नही। shame on u.. Is the given statement hateful?	1	yes
The following statement is in Hindi langauge and a non-native hindi annotated this as hateful: RT @FrustIndian: कांग्रेस इतनी घटिया पार्टी है कि उसके नेताओं का खुद मन नही होता वोट देने का। https://t.co/nnfgIrYhuY. Is the given statement hateful?	1	yes
The following statement is in Hindi langauge and a non-native hindi annotated this as hateful: @NeHa_Ji_ कुछ तो शर्म करो बोलना है तो साफ साफ बोलो पर कम से कम सरदार बोलना है तो इज्जत से बोलो क्योकि सारा देश सरदार के नाम से सिर्फ सरदार पटेल को जनता है समझे । और दूसरे सरदार सिख है तो कम से कम ऐसा न लिखे जिससे किसी को प्रॉब्लम हो जाये ।. Is the given statement hateful?	0	no
The following statement is in Hindi langauge and a non-native hindi annotated this as hateful: RT @fatwa_man: एक सच्चे मुस्लिम को उसके मान से भटकाने के लिए शैतान घर में मँडराने लगते हैं लेकिन शैतानों को पखाने की बदबू बहुत बुरी लगती है…. Is the given statement hateful?	1	yes
The following statement is in Hindi langauge and a non-native hindi annotated this as hateful: मैच हार कर भी, लोगो के दिल जीतने वाले को #MSDhoni कहते है🙌😘 #IPLFinal2019 #CSk #Yellove #Dhoni #CSKvMI #CSKForever. Is the given statement hateful?	0	no
The following statement is in Hindi langauge and a non-native hindi annotated this as hateful: RT @gurdeepsappal: नोटबंदी पर RBI की नहीं सुनी GST पर experts की नहीं सुनी पठानकोट में ISI को बुलाया, सेना की नहीं सुनी नवाज़ शरीफ़ के घर ग…. Is the given statement hateful?	0	yes
The following statement is in Hindi langauge and a non-native hindi annotated this as hateful: RT @SohailBobby: 2-2 करोड़ की रैली सजाई जाती 50-50 लाख देकर भीड़ बुलाई जाती है लाखों का सूट-बूट पहन कर मोदी आते है 🤔और मंच से बताते है कां…. Is the given statement hateful?	0	no
The following statement is in Hindi langauge and a non-native hindi annotated this as hateful: RT @AaliaBhat_: अर्ज किया है 😂😂 एक लड़की को एक लड़का बार बार फोन करके परेशान किए जा रहा था तंग आकर लड़की ने सिम को ही निकाल कर फेंक दिया…. Is the given statement hateful?	0	no
The following statement is in Hindi langauge and a non-native hindi annotated this as hateful: RT @brawling_virago: सोचता हूँ कि वो कितने मासूम थे क्या से क्या हो गया देखते देखते https://t.co/jCLRJensWK. Is the given statement hateful?	0	no
The following statement is in Hindi langauge and a non-native hindi annotated this as hateful: RT @narendramodi_in: आज दुनिया में जो भारत की गूंज सुनाई दे रही है, देश उसके लिए भारतीय जनता पार्टी को और मोदी को वोट दे रहा है। आतंक के…. Is the given statement hateful?	0	no
The following statement is in Hindi langauge and a non-native hindi annotated this as hateful: @desh_bhkt मुझे कुछ मिले न मिले,गम नहीं, मोदी जी के हाथों में देश की बागडोर किसी खजाने से कम नही, https://t.co/dT18ZKjhcy. Is the given statement hateful?	0	no.
The following statement is in Hindi langauge and a non-native hindi annotated this as hateful: RT @AchAnkurArya: सीधे काबा में खडे होकर अल्ला से सीधे मोदी के खात्मे की यह दुआ बताती है कि मोदी को हटाना मुसलमानों के वश की बात नही, शायद…. Is the given statement hateful?	1	yes
The following statement is in Hindi langauge and a non-native hindi annotated this as hateful: RT @rukasa007: अमेरिकी राजदूत से कहने लगे कि भारत के लिए चिंता का विषय ‘हिन्दू आतंक’ है, न कि ‘जेहादी आंतक’ सिंह का दावा है कि हिन्दू आतंक…. Is the given statement hateful?	0	no.
The following statement is in Hindi langauge and a non-native hindi annotated this as hateful: @jigneshmevani80 ऐसे दबंगई दिखाने वाले गुंडो को सड़क पर सबके सामने मारना चाहिए। जो जाति के आधार पर भेदभाव करते हैं।. Is the given statement hateful?	1	yes
The following statement is in Hindi langauge and a non-native hindi annotated this as hateful: @narendramodi सारे नेता का मुँह शिर्फ इसलिए बंद हैं क्योंकि वहाँ कांग्रेस की सरकार हैं भाजपा की सरकार होती तो अभी राजस्थान सुलग रहा होता सारे हरिजन नेता वहां की सरकार की धज्जियाँ उड़ा रहे होते ✍️. Is the given statement hateful?	1	no
The following statement is in Hindi langauge and a non-native hindi annotated this as hateful: RT @shankerjoshi001: @AsaramBapuJi हर पल मे खुशी देती है मां अपनी ज़िंदगी से जीवन देती है मां, भगवान🌞क्या है !! मां की…. Is the given statement hateful?	0	no.
The following statement is in Hindi langauge and a non-native hindi annotated this as hateful: RT @QuintHindi: एक महिला ने दावा किया है कि @AtishiAAP की छवि खराब करने के लिए कैंपेन चलाने को कहा गया था. कौन है ये महिला? क्या है पूरा मा…. Is the given statement hateful?	1	no
The following statement is in Hindi langauge and a non-native hindi annotated this as hateful: RT @Victimbypolice: ग्रेटर नोएडा में दबंगो ने सड़क पर एक युवती को पीटा अपना वेतन मांगने को लेकर बीच रोड पर युवती की पिटाई दबंगो ने लाठी डं…. Is the given statement hateful?	1	yes
The following statement is in Hindi langauge and a non-native hindi annotated this as hateful: RT @VINEET4BJP: आपको क्या लगता है उन बच्चों की अम्मा ने उनको टोपी और झंड़ा लाकर दिया था कि गाली के साथ नारे लगाओ? कोई मां तो कम से कम ये न…. Is the given statement hateful?	0	yes
The following statement is in Hindi langauge and a non-native hindi annotated this as hateful: RT @Rajeshbhanjan2: जब भी कोई सिकुलर कोंग्रेसी गुलाम चाटुकार चरणचाट चमचा 'गाय' और 'बछड़े' को लेकर भाजपा पर तंज कसता हुआ दिखे तो इतिहास के झ…. Is the given statement hateful?	1	yes
The following statement is in Hindi langauge and a non-native hindi annotated this as hateful: RT @SandeepMahule: काँग्रेस का कहना है कि वो सत्ता में आयी तो देशद्रोह कानून समाप्त करेगी क्यो समाप्त करेगी ??? क्योंकि काँग्रेस ही देश…. Is the given statement hateful?	1	no
The following statement is in Hindi langauge and a non-native hindi annotated this as hateful: @smitaprakash ये बंगाल मे सबसे ज्यादा वोटिंग कैसे हों जाती है यार🤔🤔🤔. Is the given statement hateful?	0	no.
The following statement is in Hindi langauge and a non-native hindi annotated this as hateful: @Arunrjd बिहार में यादवों की संख्या लगभग 14 परसेंट है 14 परसेंट यादव सारे 12 करोड़ बिहारियों का प्रतिनिधित्व नहीं कर सकते यह लालू के पक्षधर रहे हैं और हो रहेंगे लालू यादव बिहार की राजनीति से अलग हो चुके हैं और उनका सितारा डूब चुका है अब तो सिर्फ और सिर्फ भाजपा. Is the given statement hateful?	1	no
The following statement is in Hindi langauge and a non-native hindi annotated this as hateful: RT @vibhor_anand: 1 लोक सभा टिकेट 6 करोड़, दिल्ली की 7 सीट के 42 करोड़, पर फिर भी @ArvindKejriwal को 308 करोड़ का नुक्सान हुआ। कैसे???…. Is the given statement hateful?	0	no
The following statement is in Hindi langauge and a non-native hindi annotated this as hateful: @WwSNEUhc6bsMksu @sudhirchaudhary @narendramodi बंगाल की पुलिस भी बड़ी बदमाश होता है पता नहीं अब क्या होगा कुछ ऐसा वैसा हुआ ना तो बंगाल की जनता दीदी को माफ़. Is the given statement hateful?	1	yes
The following statement is in Hindi langauge and a non-native hindi annotated this as hateful: @BJP4India अर्बन नक्सल,भारत नहीं चाहता हैं।. Is the given statement hateful?	0	no
The following statement is in Hindi langauge and a non-native hindi annotated this as hateful: जिस प्रकार से देश में दलितों एवं मुस्लिमों पर अत्याचार हो रहा है इससे साफ पता चलता है कि भाजपा एक दोगली राजनीतिक पार्टियों में अव्वल है ।. Is the given statement hateful?	1	no
The following statement is in Hindi langauge and a non-native hindi annotated this as hateful: RT @KGalouri: #वेद_मेरा_भेद_है #jesus इस पूरी पृथ्वी ही नहीं बल्कि 21 ब्रह्मांड में संत रामपालजी के अलावा खुदा कहो राम कहो अल्लाह कहो गुरु…. Is the given statement hateful?	0	no.
The following statement is in Hindi langauge and a non-native hindi annotated this as hateful: @manakgupta @rajnathsingh बिल्कुल सही✔✔✔✔. Is the given statement hateful?	0	no.
The following statement is in Hindi langauge and a non-native hindi annotated this as hateful: @miss_dynamic__ तारीफ तो करो😐😐😐. Is the given statement hateful?	0	no.
The following statement is in Hindi langauge and a non-native hindi annotated this as hateful: @sheriff_eye Bharat Mein Jo Deshdrohi Hai. Is the given statement hateful?	1	yes.
The following statement is in Hindi langauge and a non-native hindi annotated this as hateful: RT @JyotsnaTak: गुज़र जाते है दिन रोज़ी रोटी कमाने में #फ़ुर्सत के वो पल अब नहि मिलते #GoodNight. Is the given statement hateful?	0	no.
The following statement is in Hindi langauge and a non-native hindi annotated this as hateful: और आपको अगर निकाल न दिया जाता तो अभी तक कॉमेडी कर रहे होते।. Is the given statement hateful?	0	no.
The following statement is in Hindi langauge and a non-native hindi annotated this as hateful: RT @BabakiJadeBoote: बिना वारंट के कोर्ट के मना करने के बाद भी वडोदरा क्राइम ब्रांच वाले भाजपा के नेताओं के कहने पर जुबेर पठान को रात के 2…. Is the given statement hateful?	0	no
The following statement is in Hindi langauge and a non-native hindi annotated this as hateful: ऐसे ही थोड़ी पप्पूडो नाम रखा है...... Is the given statement hateful?	0	no.
The following statement is in Hindi langauge and a non-native hindi annotated this as hateful: @aajtak बचपन से सुनते आया हु के भारत सोने की चिड़िया का देश है. सोने की चिड़िया तो देखा नहीं पर सोने की खानदान देख लिया. जो सोते सोते भी पैसा हर रोज़ दोगुना हो जाता है. वाह रे गाँधी परिवार.. Is the given statement hateful?	0	yes.
The following statement is in Hindi langauge and a non-native hindi annotated this as hateful: RT @iyashveerraghav: केजरी से लेकर मायावती तक आज दलित - दलित खेल रहे हैं, लेकिन दलितों का भला किसने किया ? 72 घंटों में राजस्थान में 4 बला…. Is the given statement hateful?	0	no
The following statement is in Hindi langauge and a non-native hindi annotated this as hateful: लिया जनता को गुमराह करने के लिये। बहुत ही शाजिस करनेवाला और देश को लूटनेवाला और ग़द्दार परिवार है गांधी परिवार। जनता को समझना चाहिये इस परिवार के घिनौने चेहरे को और देश की राजनीति से इसका नामोनिशान मिटाना अति आवश्यक है देश को बचाने के लिये।. Is the given statement hateful?	1	yes
The following statement is in Hindi langauge and a non-native hindi annotated this as hateful: सिर्फ़ सरकारें बदलती हैं हालात नहीं बदलते l कांग्रेस शासित राजस्थान की जेल में फिर एक मुसलमान क़ैदी की हत्या (लिंचिंग) l कांग्रेस शासन में राजस्थान में तीसरी लिंचिंग हो गई कांग्रेस सिर्फ भाजपा का डर दिखाकर वोट लेती है! बोलो कांग्रेसियों क्या इसीलिए तुम्हें वोट दिया गया था?. Is the given statement hatefu…	1	yes
The following statement is in Hindi langauge and a non-native hindi annotated this as hateful: @drushayadav 23मई bjp गयी. Is the given statement hateful?	0	no.
The following statement is in Hindi langauge and a non-native hindi annotated this as hateful: RT @ashutosh83B: क्या तेज बहादुर का पर्चा किसी दबाव में कैंसिल करवाया गया?क्या चुनाव आयोग कठपुतली बन गया? ⁦@BJP4India⁩ ⁦@yadavakhilesh⁩ ⁦@…. Is the given statement hateful?	0	no
The following statement is in Hindi langauge and a non-native hindi annotated this as hateful: RT @hadappababa: मस्जिद और मदरसा के लिए जो कदम आज श्रीलंका गोवेर्नमेट उठा रही है वो भारत में 26/11 के बाद उठा लिया जाना चाहिए था। पर नहीं…. Is the given statement hateful?	0	no
The following statement is in Hindi langauge and a non-native hindi annotated this as hateful: RT @erbmjha: बच्चों को कैसी भाषा सीखा रही कांग्रेस मोदी से नफ़रत में बच्चों को तो मत बर्बाद करो https://t.co/HsMvHsY2lC. Is the given statement hateful?	0	yes
The following statement is in Hindi langauge and a non-native hindi annotated this as hateful: 2014 में मोदी ने जनता से वोट मांगा था और आज जनता मोदीजी के लिये वोट मांग रही है। कांग्रेस ने 55 साल राज किया फिर भी खुद प्रचार कर रही है मोदी जी ने सिर्फ 55 महीने काम किया पर प्रचार जनता कर रही है. Is the given statement hateful?	1	no
The following statement is in Hindi langauge and a non-native hindi annotated this as hateful: @SubhashGanga009 @ZeeNewsHindi अरे हिजड़ों अगर मुसलमानों ने अल्लाह हू अकबर शुरू कर दिया तो घरों में पाखाना फिर मारोगे बाहर नहीं निकलोगे. Is the given statement hateful?	1	yes
The following statement is in Hindi langauge and a non-native hindi annotated this as hateful: RT @anuragspparty: धूप से जलती सड़क पर स्कूटर सवार को मेट्रो की छाया..मेट्रो का एक फ़ायदा ये भी है#कामबोलताहै ⁦@yadavakhilesh⁩ ⁦@myogiadity…. Is the given statement hateful?	0	no
The following statement is in Hindi langauge and a non-native hindi annotated this as hateful: @RubikaLiyaquat ये ट्वीट किसी कार्यकर्ता ने किया होगा। इस बात का क्या प्रमाण हैं कि राहुल गांधी ने किया हैं। सही कहा ना मैंने?. Is the given statement hateful?	0	no.
The following statement is in Hindi langauge and a non-native hindi annotated this as hateful: RT @chokidarsandhya: सब बात छोड़ो चमचों😜 अब ये बताओ EVM हैक वाला पोस्ट कब से डालना है..??🤔🤔 😀😀😁😁. Is the given statement hateful?	1	no.
The following statement is in Hindi langauge and a non-native hindi annotated this as hateful: RT @Poojasocialist: वनारस मोदी की रैली में अगर आये तो पैसा घर पहुँच जाएगा 🤣 कहा है चुनाव आयोग , अब जिंदा नही होगा चुनाव आयोग https://t.co/d…. Is the given statement hateful?	1	no
The following statement is in Hindi langauge and a non-native hindi annotated this as hateful: RT @VIKASHK98936087: @RahulGandhi कोने में बैठ कर चार अंधभक्त रो रहे थे,,, मैंने पूछा क्या हुआ ? तो बोले 23 मई की तैयारी कर रहे हैं😂🤣😂…. Is the given statement hateful?	0	no.
The following statement is in Hindi langauge and a non-native hindi annotated this as hateful: @Jitendr14272284 @Pinkimishr क्या आपने किसी मुसलमान को "इस्लामिक आतंकवाद" को सच साबित करते देखा? परन्तु आपने एक हिन्दू को "भगवा आतंकवाद" को प्रमाणित करने के लिए अदालत जाते जरुर देखा होगा! यही अंतर है.. Is the given statement hateful?	1	yes.
The following statement is in Hindi langauge and a non-native hindi annotated this as hateful: @BKaurDeep मोदी ने IPL का कप धोनी से छीन कर अम्बानी की झोली में डाल दिया-- राहुल 😂😂😂😂😂. Is the given statement hateful?	0	no.
The following statement is in Hindi langauge and a non-native hindi annotated this as hateful: RT @AgrwalRani: आधे घंटे सड़क कर सड़ता रहा हमारे PMका शरीर, पर इटली की सोनिया ने नही खोलने दिया,पार्टी का मुख्यालय। देश के प्रधानमंत्री थे…. Is the given statement hateful?	1	no
The following statement is in Hindi langauge and a non-native hindi annotated this as hateful: RT @im_VMaheshwari: गौ माता की हत्या करने वाले रिजील मक्कूट्टी को क्यों प्रोत्साहित कर रहे है राहुल गाँधी और प्रियंका वाड्रा ??? https://…. Is the given statement hateful?	0	yes
The following statement is in Hindi langauge and a non-native hindi annotated this as hateful: @mishra_dhn माँ नहीं, ये किसी लड़की की सास आयी है.... Is the given statement hateful?	0	no.
The following statement is in Hindi langauge and a non-native hindi annotated this as hateful: @TimesNow @sambitswaraj ये पालतू कुत्ता @sambitswaraj झूठ बोल रहा है राहुल गांधी ने ऐसा कोई ट्वीट नहीं किया। या तो साबित करे नहीं तो पात्रा दो बाप का। @Fekoslovakian @ModiLeDubega @Nehr_who. Is the given statement hateful?	1	no.
The following statement is in Hindi langauge and a non-native hindi annotated this as hateful: @Bhavya_SKS17 @Gyan_p_mishra @_parm_4U @prakash9237 @gautammutha1 @sahajyoti3 @Rajjais65002059 @VishalSatra1 @DigvijaynathTi4 @__kashyap__ @Sanjiv_Sahib हर हर महादेव 🙏 शुभ दिन. Is the given statement hateful?	0	no.
The following statement is in Hindi langauge and a non-native hindi annotated this as hateful: RT @BJP4India: हमारा देश गलती माफ करता है लेकिन झूठ और विश्वासघात को कभी माफ नहीं करता है। यहीं इनके 70 साल से काम करने का तरीका है। पहले…. Is the given statement hateful?	0	no
The following statement is in Hindi langauge and a non-native hindi annotated this as hateful: RT @Bhootnath18: गुजरात दलीतो के लिए नर्क बन चुका है #Gujrat #DalitLivesMatter. Is the given statement hateful?	1	yes.
The following statement is in Hindi langauge and a non-native hindi annotated this as hateful: @MeeratTariq1 He said irfan not affan yar😂😂😂😂😂 tumhe bus usi ka naam sunayi deta hai aj kal kya?🤣🤣🤣. Is the given statement hateful?	0	yes.
The following statement is in Hindi langauge and a non-native hindi annotated this as hateful: RT @RajaniSi4: अब जहर खाने के अलावा कोई रास्ता नही है 😁😁😁😁 https://t.co/DkHFNv7QX2. Is the given statement hateful?	0	no.
The following statement is in Hindi langauge and a non-native hindi annotated this as hateful: RT @BJPLive: मोदी जी वो नेता हैं जनता जिनकी 70 साल से राह देख रही थी, ऐसा नेता जो देश की जनता की चिंता करे, देश के गरीबों, किसानों, पिछड़ों…. Is the given statement hateful?	0	no
The following statement is in Hindi langauge and a non-native hindi annotated this as hateful: RT @AjayKum13838284: TMC को आतंकी संघठन घोषित करने का टाइम आ गया है 23 मई के बाद बंगाल को ममता से मुक्ति कभी भी बंगाल की ममता सरकार को बर्…. Is the given statement hateful?	1	no
The following statement is in Hindi langauge and a non-native hindi annotated this as hateful: इस बार ये चुनाव मोदी या भाजपा नहीं लड़ रही है बल्कि ये पहला चुनाव मैं देख रहा हूं जो देश की जनता लड़ रही है, देश का गरीब लड़ रहा है। अपने इस सेवक की सरकार को वापस लाने के लिए आज जनता मैदान में उतरी है: पीएम श्री नरेन्द्र मोदी #MeraVoteModiKo. Is the given statement hateful?	0	no.
The following statement is in Hindi langauge and a non-native hindi annotated this as hateful: RT @bharathmali3: विकास तुम जहां कहीं भी हो आकर अपने पापा को गुजरात ले जाओ. अब उनकी हालत पागलों जैसी हो गई है कुछ भी अनाप शनाप बके जा रहे…. Is the given statement hateful?	0	no
The following statement is in Hindi langauge and a non-native hindi annotated this as hateful: @narendramodi अपने इंदौर आ कर हमारा सबका दिल जीत लिया काल आप के आने का स्वगात इतना जबरजस्त था आज तक इतने नेता आये पर कभी भी इतनी भीड़ नही देखी ! हर मोदी https://t.co/JSsrNdxPlw. Is the given statement hateful?	0	no.
The following statement is in Hindi langauge and a non-native hindi annotated this as hateful: RT @Aartisharma23: आएगा तो मोदी ही, नहीं आया तो घसीटकर लाया जाएगा मोदी को राष्ट्रपति के पास। इस्तीफा देने के लिए! 😂. Is the given statement hateful?	0	no.
The following statement is in Hindi langauge and a non-native hindi annotated this as hateful: मसूद को अन्तर्राष्ट्रीय आतंकी घोषित कराने में कांग्रेस का भी हाथ है-- चिदंबरम! भाई हमने कब मना किया? कश्मीर की समस्या की शुरुआत कर आतंकवादी बनाने से लेकर मसूद को 'जी' रत्न अगर आप ना देते तो ये आतंकी घोषित ही ना होता!. Is the given statement hateful?	1	no
The following statement is in Hindi langauge and a non-native hindi annotated this as hateful: 23 मई को विजय चौक दिल्ली फाँसी लगाएगा चोकीदार चोर जी भासन में कहा कांग्रेस 40 सीट से ज्यादा आया आत्म हत्या करेंगे नितीस फाँसी का जल्लाद रहेगा @INCIndia @Lakhisaray @RahulGandhi @Prahladyadavrjd @SujeetK96842296 @ModiLeDubega @priyankagandhi @biharanantsingh. Is the given statement hateful?	1	yes
The following statement is in Hindi langauge and a non-native hindi annotated this as hateful: RT @fakruddienkhan: विकास पूछ रहा है अच्छे दिन कहा है!! अब की बार विकास की बत्ती गूल है!! https://t.co/soxPLqX9c5. Is the given statement hateful?	0	no
The following statement is in Hindi langauge and a non-native hindi annotated this as hateful: tmc का आतंग कब का सहेंगे हम. Is the given statement hateful?	1	yes
The following statement is in Hindi langauge and a non-native hindi annotated this as hateful: RT @RajeshChaubey12: 🍁🍁 शीशा और पत्थर संग संग रहे तो बात नही घबराने की, शर्त इतनी है कि बस दोनों ज़िद ना करे टकराने की..!!! रिश्ता होने से…. Is the given statement hateful?	0	no.
The following statement is in Hindi langauge and a non-native hindi annotated this as hateful: @UrmileshJ दलाल मीडिया के कारण देश में नफरत फैल रही है. Is the given statement hateful?	1	no
The following statement is in Hindi langauge and a non-native hindi annotated this as hateful: मोदी हैं तो सब कुछ मुमकिन है. Is the given statement hateful?	0	no.
The following statement is in Hindi langauge and a non-native hindi annotated this as hateful: RT @Dilsedesh: अमेठी में @priyankagandhi से पूछे बेतुके सवाल जनता पगला गयी पीटते पीटते बचा @sardesairajdeep खुद देख लो 😂😂🙏🙏 https://t.co/…. Is the given statement hateful?	0	yes
The following statement is in Hindi langauge and a non-native hindi annotated this as hateful: RT @BJP4Bihar: चुनावों में अपनी हार स्पष्ट देख कर महामिलावटी दल गुंडागर्दी पर उतर आये हैं। बेतिया में #NDA प्रत्याशी श्री @sanjayjaiswalMP…. Is the given statement hateful?	1	no
The following statement is in Hindi langauge and a non-native hindi annotated this as hateful: @Sukhdev00831680 भाई! ऐसा तथाकथित भ्रष्टाचार कभी होता था! पर अभी पिछले १५-२० सालों में ऐसा कुछ नहीं है! बहुत सुधार है! एक आध जगह कुछ होता भी है तो बहुत चैनल है जहां इसकी शिकायत की जाती है! पर मीडिया में इतने छोटे सी चीज के लाने का मतलब कुछ और होता है भाई! वरना हम जैसे सैनिक इसका खुद समर्थन करते!. Is the…	0	no
The following statement is in Hindi langauge and a non-native hindi annotated this as hateful: RT @yogrishiramdev: कम्युनिस्टों,ईसाइयों व मुगलों ने अपने राज्य विस्तार के लिए न्याय व कानून के नाम पर 50 करोड़ निर्दोष लोगों का कत्ल किया…. Is the given statement hateful?	1	yes
The following statement is in Hindi langauge and a non-native hindi annotated this as hateful: RT @iashwathama: एक बार बिहार वालों ने गलती से लालू को चुन लिया, उसके बाद बिहार सबसे पिछड़ा राज्य बना। ठीक वही गलती यूपी वालों ने माया-मुला…. Is the given statement hateful?	0	yes
The following statement is in Hindi langauge and a non-native hindi annotated this as hateful: RT @RssKanishk: मौलाना मसूद अजहर पर बैन लगवाने से कुछ नही होगा मोदी जी जबतक "हिना रब्बानी" को भारत नही ले आते तबतक हम नही मानेंगे!…. Is the given statement hateful?	0	no
The following statement is in Hindi langauge and a non-native hindi annotated this as hateful: RT @RamBach63967607: ➡️IBM 1951 में भारत आयी थी, तब राजीव गांधी 7 वर्ष के थे और अंगूठा चूसते थे, ➡️HCL का गठन 1976 में हुआ था, जब राजीव गां…. Is the given statement hateful?	0	no
The following statement is in Hindi langauge and a non-native hindi annotated this as hateful: RT @XSAGAR16: मृतयुद्ंड नहीं तो कम्सेकम बेघर किजीए जैसे 46000 परिवार को इसने किया है । शुरुआत मे आपने कहा था पैसे रिक्वर करने के लिए हम आप…. Is the given statement hateful?	0	no
The following statement is in Hindi langauge and a non-native hindi annotated this as hateful: RT @shaktisinhgohil: भाजपा के शासन में यह कैसा लोकतंत्र ? गुजरात के ज़ुनागढ़ में मीडिया कर्मीओ पर जमकर लाठीया चलाई गई । ज़िम्मेवार के ख़िला…. Is the given statement hateful?	1	no
The following statement is in Hindi langauge and a non-native hindi annotated this as hateful: RT @abhishekprsnl: बादलो के नीचे से प्रतिभा पे छुप के हमला करने वाले दो शख्स।। https://t.co/RJXHEhXUW9. Is the given statement hateful?	0	no
The following statement is in Hindi langauge and a non-native hindi annotated this as hateful: RT @Bhartiya_Darpan: गुजरात के गांव ओ में जातिवादी ओ का आतंक। उपर से पोलिस भी जातिवादी ओ के साथ। @Mayawati #DalitLivesMatter. Is the given statement hateful?	1	yes
The following statement is in Hindi langauge and a non-native hindi annotated this as hateful: BJP4Gujarat: आपको याद होगा की विधानसभा चुनाव के दौरान एक नामदार यहां आकर कह गए थे कि मेक इन इंदौर और मेक इन मंदसौर फ़ोन बनाऊंगा, इतना गाजे बाजे से कहा और यहां की मीडिया ने उसे छापा भी। लेकिन कांग्रेस के पूरे मेनिफेस्टो में इसका उल्लेख तक नहीं है : पीएम… https://t.co/qLIFiW3Jx8. Is the given statement ha…	1	no.
The following statement is in Hindi langauge and a non-native hindi annotated this as hateful: माना दुनियाँ बुरी है सब जगह धोखा है, लेकिन हम तो अच्छे बन सकते है हमें किसने रोका है..!! रिश्ते, प्यार और मित्रता हर जगह पाये जाते हैं, परन्तु ये ठहरते वहीं हैं – जहां पर इन्हें आदर मिलता है ।। कई बार तबियत दवा लेने से नहीं, हाल पूछने से भी ठीक हो जाती है!!. Is the given statement hateful?	0	no
The following statement is in Hindi langauge and a non-native hindi annotated this as hateful: RT @ArnabSpeaks_: आज 133 साल पुरानी कांग्रेस पार्टी "ताश की गड्डी" बनकर रह गई है जिसमें "बेगम" भी है,"गुलाम" भी है, और "जोकर" तो है ही 😃. Is the given statement hateful?	1	no.
The following statement is in Hindi langauge and a non-native hindi annotated this as hateful: @rahatindori अपनी कहानी तुम्हें अच्छी नहीं लगी बात करता था मोहब्बत की पर बदनामी अच्छी नहीं लगी. Is the given statement hateful?	0	no.
The following statement is in Hindi langauge and a non-native hindi annotated this as hateful: RT @beingAAPian: जंगल जाना तेरे बस का नहीं, वहाँ वीर जाते है वाकवीर नही और वैसे भी तुम विलासिता मे इतने लीन हो गये हो की बहुत शीघ्र लक्ष्मी…. Is the given statement hateful?	0	no
The following statement is in Hindi langauge and a non-native hindi annotated this as hateful: RT @Tiya_loveme: कभी नहीं टूटता वो रिश्ता.. जहां निभाने की चाहत दोनो तरफ़ से हो. #thoughts. Is the given statement hateful?	0	no.
The following statement is in Hindi langauge and a non-native hindi annotated this as hateful: पूरी हरामखोर टीम!. Is the given statement hateful?	1	yes
The following statement is in Hindi langauge and a non-native hindi annotated this as hateful: @ppbajpai जब कोई १९८४ दंगे के लिए माफ़ी की दरख्वास्त करता है तो क्या उसे २००२ के दंगों के लिए माफी नहीं मांगनी चाहिए ???? नागरिक तो दोनों ही हैं।. Is the given statement hateful?	1	no
The following statement is in Hindi langauge and a non-native hindi annotated this as hateful: @RealHistoryPic अगर रडार वाला ट्वीट कहीं राहुल गांधी ने किया होता तो अब तक भक्तों ने चड्डी सिर पर पहनकर,मुँह से गोमूत्र के फूफ़ारे छोड़ते हुए नागपुर तक नागिन डान्स किया होता. Is the given statement hateful?	1	yes.
The following statement is in Hindi langauge and a non-native hindi annotated this as hateful: लो, यह अब जाग गये!. Is the given statement hateful?	0	no.
The following statement is in Hindi langauge and a non-native hindi annotated this as hateful: RT @Mdhaka5: कांग्रेसी कितने भी हवन करें, भगवा में आतंकवाद के दाग लगाने के पाप से नहीं बच पाएंगे : पीएम मोदी https://t.co/pPfyEa84fR. Is the given statement hateful?	1	no
The following statement is in Hindi langauge and a non-native hindi annotated this as hateful: RT @Mj0359: चमचो को समझ आने लगा है। #Haryanavotefornation #jhajjar https://t.co/noHoTDi7VN. Is the given statement hateful?	1	no
The following statement is in Hindi langauge and a non-native hindi annotated this as hateful: RT @Jekki_KHaN_786: दिल्ली के चुनाव आये तो 1984 दंगो में सिखों का कत्लेआम याद दिलवा दिया, लेकिन 2002 गुजरात दंगों में मुस्लिमों का कत्ले…. Is the given statement hateful?	1	yes
The following statement is in Hindi langauge and a non-native hindi annotated this as hateful: @kunalkamra88 हरे रंग को खुश करने में, तुमने भगवा को नीलाम किया, अरे सियासी कलमुहो ये बहुत घिनोना काम किया, खत्म करनी तुम्हारी नोटनकी है, #भगवा मेरी जान है.. Is the given statement hateful?	1	yes
The following statement is in Hindi langauge and a non-native hindi annotated this as hateful: RT @RajaRajmani: जहाज स्टार्ट नही हो रहा था। सब परेशान थे, फिर मेरे दिमाग लगाया मैने कहा हल्का सा "निरुहा" करके किक मारो, तुरंत जहाज…. Is the given statement hateful?	0	no.
The following statement is in Hindi langauge and a non-native hindi annotated this as hateful: RT @Cruelsmoker: @sardanarohit @aajtak मोदी का ‘माया’जाल! मीडिया बनी हुई है दलाल 😁. Is the given statement hateful?	0	yes.
The following statement is in Hindi langauge and a non-native hindi annotated this as hateful: @VoiceofmyBharat आपके पेट मे मरोड़ कियू हो रहा है।अपनेे पैसे का पहनते है किसी का लूट के तो नही पहनते है।. Is the given statement hateful?	0	yes
The following statement is in Hindi langauge and a non-native hindi annotated this as hateful: किस देश कि बात कर रही है यहां चमचों और दलालो कि भीड़ ने खुद को गुलाम मान लिया है. Is the given statement hateful?	1	yes.
The following statement is in Hindi langauge and a non-native hindi annotated this as hateful: RT @SudarshanNewsTV: इधर देश चुन रहा भारत भाग्य विधाता उधर सेना ने कश्मीर में खामोश किया लश्कर के 2 दुर्दांत इस्लामिक आतंकियों को #Shopian…. Is the given statement hateful?	1	no
The following statement is in Hindi langauge and a non-native hindi annotated this as hateful: आप भी जिस चैनल में जाते हैं, वहां की स्क्रिप्ट भी तय रहती है।. Is the given statement hateful?	0	no.
The following statement is in Hindi langauge and a non-native hindi annotated this as hateful: जूते से मारो मोदी, योगी जैसे दलालों को! कमीने एक सैनिक को चुनाव लड़ने से रोकता हैं! @yadavakhilesh @adgpi @ArvindKejriwal @Mayawati @MamataOfficial. Is the given statement hateful?	1	yes
The following statement is in Hindi langauge and a non-native hindi annotated this as hateful: @2Suhana25 @sardanarohit सुहाना सुलग तो तेरी रही है और अपना गणित सही करो 25 मई नहीं 23 मई। इसी दिन सभी चमचें आत्महत्या कर लेंगे जिसमे तेरा नाम भी होगा। #फिरएकबारमोदीसरकार. Is the given statement hateful?	1	yes.
The following statement is in Hindi langauge and a non-native hindi annotated this as hateful: RT @IIGoDMomll: लो ये दो कौड़ी के आपिये बोल रहे है इनका भाव 10 करोड़ है लेकिन इनका मालिक कांग्रेस के सामने गठबंधन के लिए भीख माँगकर टीवी पर…. Is the given statement hateful?	1	no
The following statement is in Hindi langauge and a non-native hindi annotated this as hateful: @parvtyagi07 @muftitayyib2 @SharwanLakhani @Mayawati सुना है श्रीलंका मे पिछवाङा उठाना मना कर दिया गया है😂😂😂😂😂😂. Is the given statement hateful?	1	no.
The following statement is in Hindi langauge and a non-native hindi annotated this as hateful: @ZeeNewsHindi रावण और उसकी भीम सेना का नकाब उतर गया ये सिर्फ भारत में जातिवाद का जहर घोलने वाले है इनको मतलब नहीं दलित बेटियों की ईज्जत सरेआम विडियो बनाकर लूटी जाती है तो लूटी जाऐ इन्होने चूं तक नहीं की । सरकार और दूसरी जातियों पर लांछण जितने मर्जी लगवा लो देश में फूट डलवा लो बस. Is the given statement …	1	yes
The following statement is in Hindi langauge and a non-native hindi annotated this as hateful: RT @1995KUMARVIJAY: आतंकी मसूद अज़हर के दिन अब लद ही गए। ग्लोबल आतंकी घोषित करने के प्रस्ताव को लेकर चीन ने अड़ंगा डालने वाला रुख़ बदला। क…. Is the given statement hateful?	0	no
The following statement is in Hindi langauge and a non-native hindi annotated this as hateful: @BhimKiBeti भाभी उंगली कैसी है । सुना फैक्चर हो गया था. Is the given statement hateful?	0	no.
The following statement is in Hindi langauge and a non-native hindi annotated this as hateful: एक तन्हा रात में तुम्हारी याद आ गयी, याद भुलाने के लिए हमने एक शमां जला दी, क्या कायनात दिखा दी उस शमां ने हमको, उसके उठते धुएं ने तुम्हारी तस्वीर ही बना दी…. Is the given statement hateful?	0	no
The following statement is in Hindi langauge and a non-native hindi annotated this as hateful: RT @narendramodi_in: किसानों का 2 लाख तक का कर्ज माफ होना था। किसानों के घर आज पुलिस आ रही है, बैंक किसानों को कर्ज नहीं दे रहे, और ये कह…. Is the given statement hateful?	0	no
The following statement is in Hindi langauge and a non-native hindi annotated this as hateful: @ppbajpai वाजपेई जी अभी तो चुनाव में खड़े हो रहे हैं शख्स का नामांकन ही रद हो रहा है अगर 5 साल और भाजपा रही ना तो सांस लेने रोड में चलने सब पर पाबंदी लग जाएगी Television पर सिर्फ नमो टीवी का कबजा होगा और चाह कर भी कोई कुछ नहीं देख पाएगा सच हमेशा के लिए विलुप्त हो जाएगा. Is the given statement hateful?	1	no
The following statement is in Hindi langauge and a non-native hindi annotated this as hateful: RT @rjdevenderkumar: यह पहली बार वोट देने जा रही है और इन्हें लगता है कि केंद्र में बदलाव जरूरी है.. दिल्ली के युवा जो पहली बार वोट दे र…. Is the given statement hateful?	0	no
The following statement is in Hindi langauge and a non-native hindi annotated this as hateful: @ameytirodkar फेकेंन्द्र रडार महाराज की जय हर हर रडार घर घर रडार भक्त है तो मुनकीन है 🙏😀😎🙏 https://t.co/W7XRaefLNp. Is the given statement hateful?	1	no.
The following statement is in Hindi langauge and a non-native hindi annotated this as hateful: छुटकी दीदी जरूरी नहीं कि अगर मायके से छुट्टियों में आने के लिए फोन ना आए, तो आप आने का कोई प्लान बनाएं ही ना। बोलिए कब की टिकट बनाई है अपनी?" भाभी ने फोन पर कहा। https://t.co/0pPd5E9rTT. Is the given statement hateful?	0	no
The following statement is in Hindi langauge and a non-native hindi annotated this as hateful: RT @devender_bjp: हर वोट की अहमियत है, हर वोट खास है, वोट सिर्फ ठप्पा नहीं, हमारी आवाज है। #shahkishaan4nahan #ShahKishan4Chamba…. Is the given statement hateful?	0	no.
The following statement is in Hindi langauge and a non-native hindi annotated this as hateful: @msisodia Agar offer diya hai to le lo bhaiyon. Baad main chavanni bhi nahin milegi. Is the given statement hateful?	0	no.
The following statement is in Hindi langauge and a non-native hindi annotated this as hateful: RT @NkumarAAP: बुराड़ी विधानसभा में SMS Public School के बूथ पर EVM को शील नहीं किया है बूथ एजेंट को जबरदस्ती साइन करा के बाहर निकाल दिया…. Is the given statement hateful?	1	no.
The following statement is in Hindi langauge and a non-native hindi annotated this as hateful: @minesh_jsn @krishak_sandeep @RubikaLiyaquat सब प्रियंका वाड्रा का ड्रामा है. Is the given statement hateful?	0	no
The following statement is in Hindi langauge and a non-native hindi annotated this as hateful: RT @ajitanjum: इंडिया टुडे पर तुरंत देशद्रोह का मुकदमा दर्ज होना चाहिए .ऐसी कवर स्टोरी कोई पाकिस्तानी ही छाप सकता है कि करोड़ से ज्यादा नौ…. Is the given statement hateful?	1	yes
The following statement is in Hindi langauge and a non-native hindi annotated this as hateful: RT @NehaBishwas: मीडिया वाले भी कम फ़िल्मी नहीं हो गए है...सवाल करेंगे जैसे सामने प्रधानमंत्री नहीं कोई बच्चा हो और जवाब ऐसे सुनेंगे जैसे…. Is the given statement hateful?	1	no
The following statement is in Hindi langauge and a non-native hindi annotated this as hateful: RT @RudraTheStorm: साला ऐसा प्रचार तो अपने यहां हुआ ही नहीं,ये तो जनता के साथ चीटिंग है, EC फिर से इलेक्शन कराओ: https://t.co/4Ymim0gfqF. Is the given statement hateful?	0	no
The following statement is in Hindi langauge and a non-native hindi annotated this as hateful: RT @AjayKum13838284: जिसतरह मुसलमानों और देश के हिन्दू विरोधी नेताओ ने 1990 में कश्मीरी पंडितों को घर से भगाया और बहू बेटियों के साथ दुष्क…. Is the given statement hateful?	1	yes
The following statement is in Hindi langauge and a non-native hindi annotated this as hateful: RT @TV9Bharatvarsh: मुझे हराने वाला कोई पैदा नहीं हुआ, ईश्वर के लिखे लेख को भी मैं मिटा सकता हूं- @nirahua1 #Phase6 #AadeshDeshKa #VotingRo…. Is the given statement hateful?	0	no
The following statement is in Hindi langauge and a non-native hindi annotated this as hateful: RT @Hindinama2: सच है विपत्ति जब आती है कायर को ही दहलाती है सूरमा नहीं विचलित होते क्षण एक नहीं धीरज खोते विघ्नों को गले लगाते हैं काँटों…. Is the given statement hateful?	0	no
The following statement is in Hindi langauge and a non-native hindi annotated this as hateful: @J23958447 साथ चलेंगे कदम से कदम मिलाकर चलेंगे. Is the given statement hateful?	0	no.
The following statement is in Hindi langauge and a non-native hindi annotated this as hateful: अगर मतदान के दिन आपकी ऊँगली पर स्याही का निशान नहीं है तो अगले पाँच साल तक, आपको किसी के ऊपर ऊँगली उठाने का अधिकार नहीं है। *उठिए और मतदान करें ।*. Is the given statement hateful?	0	no.
The following statement is in Hindi langauge and a non-native hindi annotated this as hateful: RT @DrGPradhan: "वसुंद्र तेरी खैर नहीं" बोलने वाले NOTA वीरों देखो @rahulgandhi के राज में गरीब किसानों के खेत नीलाम हो रहे है ये है @inc…. Is the given statement hateful?	1	yes
The following statement is in Hindi langauge and a non-native hindi annotated this as hateful: बी जे पी तो मुफ़्त मे भी ना ख़रीदे ये तो इन गिरगिटों की अपनी बिकने की क़ीमत बताने का तरीक़ा है ताकि अगर कोई ख़रीदना चाहे तो ख़रीद सकता है. Is the given statement hateful?	1	no
The following statement is in Hindi langauge and a non-native hindi annotated this as hateful: @MajorPoonia @narendramodi @priyankagandhi अधूरा वीडियो बनाकर पहले से ही गुमराह लोगों को और क्यों गुमराह कर रहे हो।. Is the given statement hateful?	0	no.
The following statement is in Hindi langauge and a non-native hindi annotated this as hateful: @kamleshtiwari03 कमलेश जी इन सुरो से दोगली कोम दुनिया भर में कोई नहीं इन सालो सारी आजादी हिन्दुस्तान में ही चाहिए अमेरिका में नंगे होंगे चीन में सुअर का मांस खाने को मजबूर लंका में इनकी लंका ही कर डाली म्यामांर में इनकी माँ बहन एक करदी आजादी हिन्दुस्तान में ही चाहिए. Is the given statement hateful?	1	yes
The following statement is in Hindi langauge and a non-native hindi annotated this as hateful: @AabidShaikh77 @TarekFatah नहीं बे तेरा मोहम्मद अपनी माँ को पहली बार ठोका बोला हर औरत मेरी माल है तबसे इस्लाम में हलाला के नाम पर किसी को पेल देते हैं 😂😂😂😂😂😂😂😂😂😂😂😂😂😂😂😂😂😂😂😂😂😂😂😂. Is the given statement hateful?	1	yes.
The following statement is in Hindi langauge and a non-native hindi annotated this as hateful: रखा है क्या दस करोड तो तेरे लिये हरी झंडी है । कमा लेना सौ करोड ये गुलामो की मन्डी है ।। ऎसा फायदा तब पाएगा । जब राजनीति मे आएगा ।।. Is the given statement hateful?	0	yes
The following statement is in Hindi langauge and a non-native hindi annotated this as hateful: RT @NAgarwal8: कांग्रेस और कांग्रेसी राजस्थान के अलवर दुष्कर्म कांड पर कुछ नहीं बोलते इतने भयंकर कांड को इन्होंने वोट की खातिर दबाया क्यों?…. Is the given statement hateful?	1	no
The following statement is in Hindi langauge and a non-native hindi annotated this as hateful: RT @iamNileshDubey: जब प्रियंका अमेठी में बोल रही थी कि मोदी झूठ बोलता है । उस वक़्त राहुल गांधी कोर्ट में झूठ बोलने पर माफीनामा दे रहा था🖕…. Is the given statement hateful?	0	yes
The following statement is in Hindi langauge and a non-native hindi annotated this as hateful: वोट जरुर करें। धूप हो या छांव हो, वोट करें राष्ट्र के निर्माण में, राष्ट्र के सम्मान में, प्रजातंत्र के अभिमान में, अपना योगदान दें। वोट जरुर करें https://t.co/2WPgJGemMZ. Is the given statement hateful?	0	no.
The following statement is in Hindi langauge and a non-native hindi annotated this as hateful: भगतसिंह, चंद्रशेखर, सरदार पटेल, मोरारजी देसाई , सुभाषचंद्र बोस , जैसे क्रांतिकारियों के साथ अन्याय करनेवालों का न्याय कर आई हूं देश की चाबी सुरक्षित हाथो में सौंप कर आई हूं भ्रष्टाचारियों के किस्मत के दरवाज़े बंद करके आई हूं सर्जिकल स्ट्राइक के सबूत मंगनेवालो के सबूत नष्ट . https://t.co/KqwPzuIrLn. Is t…	0	no
The following statement is in Hindi langauge and a non-native hindi annotated this as hateful: ऐसा लग रहा है जैसे पं बंगाल मे रक्षस राज चल रहा है...ममता सरकार राक्षसों की तरह व्यवहार कर रही है और उनके कार्यकर्ता नरभक्षी हो चुके है...सैकड़ों जानें सिर्फ चुनाव जीतने के लिए ले लिया गया है।. Is the given statement hateful?	1	yes
The following statement is in Hindi langauge and a non-native hindi annotated this as hateful: @msisodia 10-10 करोड़ 😱😱😱 फिर से चेक करो। १० हजार कहा होगा।. Is the given statement hateful?	0	no
The following statement is in Hindi langauge and a non-native hindi annotated this as hateful: RT @iamsolanki_: हर कोई उंगली पे स्याही लगा कर राहुल गांधी औऱ उनके चमचो को उंगली कर रहा है 😂🤣😂😂 #DeshKeDilMeiModi #VotingRound6. Is the given statement hateful?	1	yes
The following statement is in Hindi langauge and a non-native hindi annotated this as hateful: कांग्रेसी भारत से भागने ना पाये उनको जेल बन्द कर रोज कोडा मारना है. Is the given statement hateful?	1	yes.
The following statement is in Hindi langauge and a non-native hindi annotated this as hateful: 1984 के सिख दंगों को लेकर UP के पूर्व डीजीपी ने फेसबुक पर डाली ये पोस्ट, मिली ये प्रतिक्रिया https://t.co/yMHYocxSgU. Is the given statement hateful?	0	no
The following statement is in Hindi langauge and a non-native hindi annotated this as hateful: UNSC के द्वारा आतंकी मसूद अजहर को global terrorist घोषित किए जाने पर अब हो सकता है कई लोग इसे भी BJP की चाल बता दे। हो सकता है कि ये लोग पूछ ले कि चुनाव दौरान ही क्यों UNSC ने ये घोषणा कि। अपनी आदत से बाज थोड़ी ना आयेंगे ये। #BJP4India #beatAjhar ##BeatTerror #BeatPakistan #Badla. Is the given statement…	1	no
The following statement is in Hindi langauge and a non-native hindi annotated this as hateful: RT @mntlive: बुर्का बैन को साध्वी प्रज्ञा ने बताया राष्ट्रहित में जरूरी, BJP ने किया विरोध https://t.co/HMqwM93Idg @ali786_rahim @ALIMUKTED…. Is the given statement hateful?	1	no
The following statement is in Hindi langauge and a non-native hindi annotated this as hateful: RT @SinghAwantika: अभी तक यह इन लोगो ने नही कहा था तो मुझे चिंता होने लगी थी कि AAP चुनाव लड़ भी रही है या नही? अभी चिंता का एक और विषय है…. Is the given statement hateful?	0	no.
The following statement is in Hindi langauge and a non-native hindi annotated this as hateful: RT @sanjay_dimpy: कांग्रेस अब बहुत पीछे जा चुकी है बेहतर है भाजपा को हराने के लिए आप को वोट करें।. Is the given statement hateful?	1	no
The following statement is in Hindi langauge and a non-native hindi annotated this as hateful: @narinderwaraich @Sayed_Baqur @democraticdon @NarinderKBharaj @BhagwantMann सरदार जी canada जाने की जगह कभी खेतो में भी चले जाए पता लाग जाएगा कि आग क्यू लगाई गई थी।. Is the given statement hateful?	1	no.
The following statement is in Hindi langauge and a non-native hindi annotated this as hateful: RT @I_am_Anil_Tyagi: डॉक्टरों ने सुमित्रा महाजन का माइक छीना, बोले- BJP की आयुष्मान योजना ने पेशे को बर्बाद कर दिया है https://t.co/U4vp255…. Is the given statement hateful?	1	no.
The following statement is in Hindi langauge and a non-native hindi annotated this as hateful: स्मृति मैडम — क़र्ज़ा तो माफ़ हो गया , क्यूँकि —कांग्रेस का वचन था ,जो पूरा किया !! लेकिन —मोदी जी के १५, लाख , किसानो की दोगुनी आय , और २, करोड़ नौकरियों का क्या हुआ , उनके बारे तो पूछ लेती !@OfficeOfKNath @RahulGandhi @priyankagandhi https://t.co/rMSU6CI3Ia. Is the given statement hateful?	0	no.
The following statement is in Hindi langauge and a non-native hindi annotated this as hateful: RT @P_K_G17: @SarojMi86385397 फालो कर ले साहब,,आप का ही वही पुराना हरी ऊँ हूँ,. Is the given statement hateful?	0	no.
The following statement is in Hindi langauge and a non-native hindi annotated this as hateful: https://t.co/2L9TfHl2f5 Inko हमारे देश मे दोगले लोग सेक्युलर कहते है..... या to ye दोगले लोग अंधे है या तैमूर के नाज़ायज़ औलाद है जिनका naam हिन्दू है... और मौका पाते ही खतना कराने को तैयार है https://t.co/2L9TfHl2f5. Is the given statement hateful?	1	yes.
The following statement is in Hindi langauge and a non-native hindi annotated this as hateful: RT @RakeshS90711255: #माँ का दिन नही होता #माँ से ही दिन होता है❤ सब पोस्ट कर रहे है लव यू माँ वास्तव मे सच्चाई क्या है? घर के चाहे माँ…. Is the given statement hateful?	0	no
The following statement is in Hindi langauge and a non-native hindi annotated this as hateful: @girirajsinghbjp यहाँ सहिष्णु,अहिंसक,सर्व धर्म समभाव हिंदू हैं...हमारी विनम्रता को कमजोरी समझा गया| और कुछ स्वार्थी राजनीतिज्ञ जिस थाली में खाते हैं उसी में छेद कर रहे हैं....जितनी उदारता यहाँ है विश्व में और कहीं नहीं मिलेगी |. Is the given statement hateful?	1	no
The following statement is in Hindi langauge and a non-native hindi annotated this as hateful: RT @AB_BJP: श्री @RahulGandhi और @sherryontopp के लिए संस्कृत का एक दोहा याद आ रहा है 👇 उष्ट्राणां च विवाहेषु गीतं गायन्ति गर्दभा:। परस्प…. Is the given statement hateful?	0	no
The following statement is in Hindi langauge and a non-native hindi annotated this as hateful: @SumitBajoria @boomboxheto @iAnkurSingh @iamnarendranath किया सृजन भूमि घोटाला, पकड़े जाने, जेल जाने के डर से ठग से चिपका है अभी कूर्मीलाला, छोड़ेगा फिर भाजपा को, मारेगा पल्टी और मिलेगा जादो से, गुजर कर हलाला!!. Is the given statement hateful?	1	yes.
The following statement is in Hindi langauge and a non-native hindi annotated this as hateful: RT @SoniyaGupta69: अब अच्छा लग रहा है, प्लीज़ अब रुकना मत और जोर से मुझे चूत में खुजली हो रही है। https://t.co/7ncQQvbMhZ https://t.co/…. Is the given statement hateful?	0	yes
The following statement is in Hindi langauge and a non-native hindi annotated this as hateful: कांग्रेस का हरामीपन देखिये, सिखों का नरसंहार करके भी सरदार मनमोहन सिंह से ही माफी मंगवाई, नेहरू परिवार ने माफ़ी नही मांगी।. Is the given statement hateful?	1	yes
The following statement is in Hindi langauge and a non-native hindi annotated this as hateful: RT @KulwantDass3: #SundayMotivation #jesus इस पूरी पृथ्वी ही नहीं बल्कि 21 ब्रह्मांड में संत रामपालजी के अलावा खुदा कहो राम कहो अल्लाह क…. Is the given statement hateful?	0	no.
The following statement is in Hindi langauge and a non-native hindi annotated this as hateful: @KajalPandeyIND @AlkaSaxena22 बाप ने चारा बाहर खाया गोबर जेल में कर रहा है कह रहा है शेर का बेटा हु। कोई न कोई लफड़ा है. Is the given statement hateful?	0	yes.
The following statement is in Hindi langauge and a non-native hindi annotated this as hateful: #SayNoToStubbleBurning खेतों में पराली जलाने के बहुत से नुकसान है, इस से मिट्टी की उपरी सतह जल जाती है, जिससे भुमि की उपजाऊ शक्ति कम हो जाती है, अगली फसल के लिए ज्यादा पानी, खाद कीट्नाशक दवाईयो का इस्तेमाल करना पड़ता है! @Gurmeetramrahim @Derasachasauda https://t.co/wOVeYc0zSo. Is the given statement ha…	0	no.
The following statement is in Hindi langauge and a non-native hindi annotated this as hateful: RT @Virende72294454: #WednesdayMotivation तंबाकू रूपी जानलेवा लत से छुटकारा पाने के लिए तंबाकू मुक्त नशा मुक्त अभियान चलाया जा रहा है जिस…. Is the given statement hateful?	0	no
The following statement is in Hindi langauge and a non-native hindi annotated this as hateful: @Amitshah कमाल है ये वर्तमान #भारत_सरकार जनता छाती पीट-पीटकर दिनरात इनसे #भ्रष्टाचार के स्यापे कर रही है और ये क्या कह रहे है⁉ यानि जनता की औकात बतारहेहैं⁉ रोतीरहे/पिटतीरहे जनता..‼ये अति पॉवरफुल सत्ताधारी खुद को #गरीब #दलित #पिछडा ...बता बताकर सिंपैथी गेन गेम में लगे हुए है. Is the given statement hatef…	1	yes
The following statement is in Hindi langauge and a non-native hindi annotated this as hateful: RT @AvantikaDs: पाकिस्तानी लेखक ने बिल्कुल सही लिखा.. मोदी ने देशभक्त और देशद्रोहियों के बीच विभाजन कर दिया है..!!. Is the given statement hateful?	0	yes
The following statement is in Hindi langauge and a non-native hindi annotated this as hateful: RT @Bengalan_kudi01: एक घर में I miss you और I love you रहते थे एक दिन Miss you छोङ कर चला गया तो बताओ कौन बचा????😭😭 😢😢😢😢 #No_bad_comment…. Is the given statement hateful?	0	no
The following statement is in Hindi langauge and a non-native hindi annotated this as hateful: RT @TheRightster: @theskindoctor13 "अगर बात छेड़ी तो वो तुम्हें कहीं का नहीं छोड़ेगी |". Is the given statement hateful?	0	no
The following statement is in Hindi langauge and a non-native hindi annotated this as hateful: @AMISHDEVGAN @News18India @GDuttTweets @sambitswaraj @CNBC_Awaaz पत्रकार नहीं बीजेपी चमचा है, दिमाग में कीचड़ है इसी लिए इसे लगता है कमल खिला है |. Is the given statement hateful?	1	no
The following statement is in Hindi langauge and a non-native hindi annotated this as hateful: RT @mahendra899: पूरा विडियो देंखे और कांग्रेस की हिंदुओ के प्रति नफरत का खुद ही मूल्यांकन करें। https://t.co/78Jlytchxr. Is the given statement hateful?	1	no.
The following statement is in Hindi langauge and a non-native hindi annotated this as hateful: RT @Gaytri100: #TuesdayThoughts ज्ञान है यह ऐसा 21 ब्रह्मांड में भी नहीं है ऐसा? जिसे सुनकर पूरे भारत क्या विश्व में खलबली मची हुई है यह…. Is the given statement hateful?	0	no
The following statement is in Hindi langauge and a non-native hindi annotated this as hateful: @ManishSharmash9 @RubikaLiyaquat @Denipatel_ @RahulGandhi क्यूकि एक आतंकवादी घोषित हो गया। बेचारे रो रहे होंगो. Is the given statement hateful?	1	no
The following statement is in Hindi langauge and a non-native hindi annotated this as hateful: RT @BJP4India: जब इन लोगों को मौका मिला तो इन्होंने NRHM घोटाला कर दिया, एंबुलेंस में घोटाला कर दिया। जब मुझे सेवा का अवसर मिला तो देश के…. Is the given statement hateful?	1	yes
The following statement is in Hindi langauge and a non-native hindi annotated this as hateful: RT @50b3c5c9649b4e0: 28 साल पहले राजीव गांधी INS विक्रांत पर छुट्टीयां बिता रहे थे ये पता है, मगर पुलवामा मे RDX कौन लेकर आया यह अभी तक पता…. Is the given statement hateful?	0	no
The following statement is in Hindi langauge and a non-native hindi annotated this as hateful: RT @Pinkimishr: एक बाबरी टूटी थी मुसलमान आज तक भाजपा को वोट नहीं देता। लाखों मंदिर कांग्रेस ने तुड़वाए फिर भी हिंदू समझते नहीं।।. Is the given statement hateful?	1	yes
The following statement is in Hindi langauge and a non-native hindi annotated this as hateful: @kamaalrkhan आखिरकार मोदी &amp; कं. दिल्ली १९८४ सिख दंगों का ठीकरा कांग्रेस के ऊपर की जगह खुद आरएसएस के ऊपर आते देखकर शांत होना पड़ा। और यही कारण है कि आज दिल्ली में हो रही वोटिंग में कांग्रेस की टक्कर में कोई नहीं दिख रहा था।. Is the given statement hateful?	1	no
The following statement is in Hindi langauge and a non-native hindi annotated this as hateful: RT @kiran_patniak: तेजबहादुर के वकील बोले- नरेंद्र मोदी के लिए 'चुनाव आयोग' ने सारे नियमों की धज्जियाँ उड़ा दी!! सड़कों पे बड़ी लड़ाई जरू…. Is the given statement hateful?	1	no
The following statement is in Hindi langauge and a non-native hindi annotated this as hateful: आदमखोर भी दिल की बात करने लगा । बस कर !. Is the given statement hateful?	1	no.
The following statement is in Hindi langauge and a non-native hindi annotated this as hateful: RT @NuhCongress_SC: लोकतंत्र का पर्व मतलब चुनाव हैं। मैं इस चुनाव का हिस्सा बन देश को मज़बूत बनाने के लिए अपना वोट #कांग्रेस को कर आया हूँ।…. Is the given statement hateful?	0	no
The following statement is in Hindi langauge and a non-native hindi annotated this as hateful: RT @AmitAgarwal9: राजस्थान में कांग्रेस जनता को मूर्ख बना रही है। 72,000 वाला फ़र्ज़ी फॉर्म बांटकर लोगों को कांग्रेस को वोट देने की भीख मां…. Is the given statement hateful?	1	no
The following statement is in Hindi langauge and a non-native hindi annotated this as hateful: क्यूँकि हर वोट है ज़रूरी #DelhiVotes #BattleOf2019 मताधिकार का प्रयोग करें... @DDNewsLive https://t.co/dCJfQx3EH2. Is the given statement hateful?	0	no
The following statement is in Hindi langauge and a non-native hindi annotated this as hateful: RT @Crahul34493715: 23/05/2019 के दिन पूरा देश इसी तरह TV देखेगा 😂🤣 https://t.co/ZU6k2x2RuK. Is the given statement hateful?	0	no
The following statement is in Hindi langauge and a non-native hindi annotated this as hateful: RT @Avantika_Pandit: #आज_का_ज्ञान😌😌 हर जगह बहस मत करो... . . . . . मारो पीटो, और बात ख़तम करो...😉😉. Is the given statement hateful?	0	no.
The following statement is in Hindi langauge and a non-native hindi annotated this as hateful: RT @kavmayor: केजरी को घूसा CONGress aka आतंकवादियो का टेंटुआ दबा के आयी हू हाँ, मै कमल खिला के आयी हूँ https://t.co/TKPJd6kKzQ. Is the given statement hateful?	1	yes
The following statement is in Hindi langauge and a non-native hindi annotated this as hateful: @shuklapinku जब मुड बिगड़ जाता हैं. Is the given statement hateful?	0	no.
The following statement is in Hindi langauge and a non-native hindi annotated this as hateful: @SanjayAzadSln @ArvindKejriwal @AtishiAAP आप वाले अब सच्चे आरोप भी लगाएंगे तो जनता झूठ समझेगी किउंकि आपियों ने झूठ बोल बोल के अपनी इमेज ही ऐसी बना ली है इसे कहते हैं अपने हाथ से अपनी कब्र खोदना ......भेड़िया आया ....भेड़िया आया वाली कहानी तो याद होगी ?. Is the given statement hateful?	1	yes
The following statement is in Hindi langauge and a non-native hindi annotated this as hateful: RT @msisodia: मोदीवाद को राष्ट्रवाद बताने वालों से मैं पूछना चाहता हूँ- - क्या बिना मजबूत शिक्षा व्यवस्था के कोई राष्ट्र मजबूत हो सकता है?…. Is the given statement hateful?	0	no.
The following statement is in Hindi langauge and a non-native hindi annotated this as hateful: RT @Bsharma7: कांग्रेस 40 सीट जीती तो मोदी लगाएंगे फाँसी-खड़गे कांग्रेसियों तुम्हारे पास गिनती के ही दिन बचे है बकवास करने के लिए।23 मई के…. Is the given statement hateful?	1	no
The following statement is in Hindi langauge and a non-native hindi annotated this as hateful: साल में सिर्फ पांच घंटे ही खुलता है ये मंदिर,एक साथ दी जाती है हजारों बकरो की बलि https://t.co/sQXweSwkXh via Dailyhunt डाउनलोड करें: https://t.co/QdScFADMW6. Is the given statement hateful?	1	yes
The following statement is in Hindi langauge and a non-native hindi annotated this as hateful: आपको देखकर लगता हैं मोटा होना भी बीर नहीं हैं ..☺️ @Radhika_Khera जी. Is the given statement hateful?	0	no.
The following statement is in Hindi langauge and a non-native hindi annotated this as hateful: RT @Binakahelunga: वो भक्त शालीन रहा होगा मैं होता तो जवाब देता मुल्लों का बाप 😝 https://t.co/MZSCt1dmZW. Is the given statement hateful?	1	yes
The following statement is in Hindi langauge and a non-native hindi annotated this as hateful: जनरल नालेज का सवाल IPhone का जो थोड़ा सा सेब कटा हुआ है उसको किसने खाया ??? किसी के पास जवाब हो तो बताना.. 😀😀😀. Is the given statement hateful?	0	no.
The following statement is in Hindi langauge and a non-native hindi annotated this as hateful: 1984 में सिखों के साथ अत्याचार हुआ, कत्लेआम हुआ, ये कहते हैं- हुआ तो हुआ। भोपाल में हजारों लोगों को जहरीली गैस के हवाले कर दिया गया। इस पर भी ये यही कहेंगे- हुआ तो हुआ। 2014 से पहले इनकी तुष्टिकरण की नीति के कारण आतंकवाद ने हज़ारों जानें लीं।आज ये कह रहे हैं- हुआ तो हुआ: पीएम https://t.co/zTKVgVUWjk. Is…	1	yes
The following statement is in Hindi langauge and a non-native hindi annotated this as hateful: @rakeshupbjp @SheilaDikshit @ArvindKejriwal जी भईया. Is the given statement hateful?	0	no.
The following statement is in Hindi langauge and a non-native hindi annotated this as hateful: RT @aapsukhpalsingh: मार मोहरिया तान के झाड़ू के निशान पे .. #Vote4Jhaadu @ArvindKejriwal https://t.co/izVGP3TaQM. Is the given statement hateful?	0	yes
The following statement is in Hindi langauge and a non-native hindi annotated this as hateful: @BBCHindi अब जनता भेज रही है बादलों में. Is the given statement hateful?	0	no.
The following statement is in Hindi langauge and a non-native hindi annotated this as hateful: @DrSanja15467398 सर जरूर आप इस्लाम मे दाखिला लीजिए आपका तहे दिल से इस्तकबाल करते है लेकिन सर इस्लाम मे दाखिले की शर्त है कि आप सहर्ष बिना किसी दबाव के सच्चे दिल से इस्लाम को कबूल करेंगे तो ही आपका इस्लाम मे दाखिला होगा अल्लाह आपकी इस्लाम कबूल करने की हिम्मत मे और ईजाफा करे आमीन. Is the given statement h…	0	no.
The following statement is in Hindi langauge and a non-native hindi annotated this as hateful: काग्रेसी कहा मर गये् उनका जवाई आंतकी साबित हो गया. Is the given statement hateful?	1	yes
The following statement is in Hindi langauge and a non-native hindi annotated this as hateful: RT @sumitsingh4331: ये मंदिर में पूजा के लिए दिए गए रैट है अब समझ नही आता भगवान को पैसा चाहिए या भगवान के नाम पर आप ओर हम लोग को लूटे जा र…. Is the given statement hateful?	1	yes
The following statement is in Hindi langauge and a non-native hindi annotated this as hateful: @Mayawati मुसलमान को भी अपील कर दो, किसे वोट देना है. Is the given statement hateful?	1	no
The following statement is in Hindi langauge and a non-native hindi annotated this as hateful: @kiittu_ @JKS2019 देशभक्त कह सकते है..!. Is the given statement hateful?	0	no.
