# Supplementary material
Source: ML conference proceedings conference paper supplement (https://aclanthology.org/2024.emnlp-main.886)
Supplement: software [file Readme_file_guide.xlsx]

## Sheet: RQ 1
z Value		Prompt Code	<H/N>		Prompt Code	<H/N>
-		P_base	-		-	-
0		P1_1	H		P2_1	N
25		P1_2	H		P2_2	N
50		P1_3	H		P2_3	N
75		P1_4	H		P2_4	N
100		P1_5	H		P2_5	N

## Sheet: RQ 2
c Value		Prompt Code
-		P_base
United States		P1
Australia		P2
United Kingdom		P3
South Africa		P4
Singapore		P5

## Sheet: RQ 3
Persona		Prompt Code	<H/N/A>		Prompt Code	<H/N/A>		Prompt Code	<H/N/A>
male		P1_1	H		P2_1	A		P3_1	N
female		P1_2	H		P2_2	A		P3_2	N
Non-binary		P1_3	H		P2_3	A		P3_3	N
asian		P1_4	H		P2_4	A		P3_4	N
black		P1_5	H		P2_5	A		P3_5	N
hispanic		P1_6	H		P2_6	A		P3_6	N
middle eastern		P1_7	H		P2_7	A		P3_7	N
white		P1_8	H		P2_8	A		P3_8	N
liberal		P1_9	H		P2_9	A		P3_9	N
indepedent		P1_10	H		P2_10	A		P3_10	N
conservative		P1_11	H		P2_11	A		P3_11	N
christian		P1_12	H		P2_12	A		P3_12	N
buddhism		P1_13	H		P2_13	A		P3_13	N
islam		P1_14	H		P2_14	A		P3_14	N
judaism		P1_15	H		P2_15	A		P3_15	N
hinduism		P1_16	H		P2_16	A		P3_16	N
irreligious		P1_17	H		P2_17	A		P3_17	N
level less than high schoo		P1_18	H		P2_18	A		P3_18	N
high school		P1_19	H		P2_19	A		P3_19	N
college		P1_20	H		P2_20	A		P3_20	N
bachelor		P1_21	H		P2_21	A		P3_21	N
master's		P1_22	H		P2_22	A		P3_22	N
PhD		P1_23	H		P2_23	A		P3_23	N

## Sheet: ML
Context		Prompt Code	<H/N>		Prompt Code	<H/N>
-		PA_base	-		-	-
Arabic		PA_1	-		-	-
Arabic + Muslim		PA_2	H		PA_6	N
Arabic + Non-Muslim		PA_3	H		PA_7	N
Arabic + Native		PA_4	H		PA_8	N
Arabic + Non-Native		PA_5	H		PA_9	N
-		PF_base	-		-	-
French		PF_1	-		-	-
French + French Descent		PF_2	H		PF_6	N
French + mediterranean descent		PF_3	H		PF_7	N
French + Native		PF_4	H		PF_8	N
French + Non-Native		PF_5	H		PF_9	N
-		PG_base	-		-	-
German		PG_1	-		-	-
German + Native German		PG_2	H		PG_6	N
German + Non-Native German		PG_3	H		PG_7	N
German + Native		PG_4	H		PG_8	N
German + Non-Native		PG_5	H		PG_9	N
-		PH_base	-		-	-
Hindi		PH_1	-		-	-
Hindi + Upper Caste		PH_2	H		PH_6	N
Hindi + Lower Caste		PH_3	H		PH_7	N
Hindi + Native		PH_4	H		PH_8	N
Hindi + Non-Native		PH_5	H		PH_9	N
