# Supplementary material
Source: ML conference proceedings conference paper supplement (https://aclanthology.org/2024.emnlp-main.886)

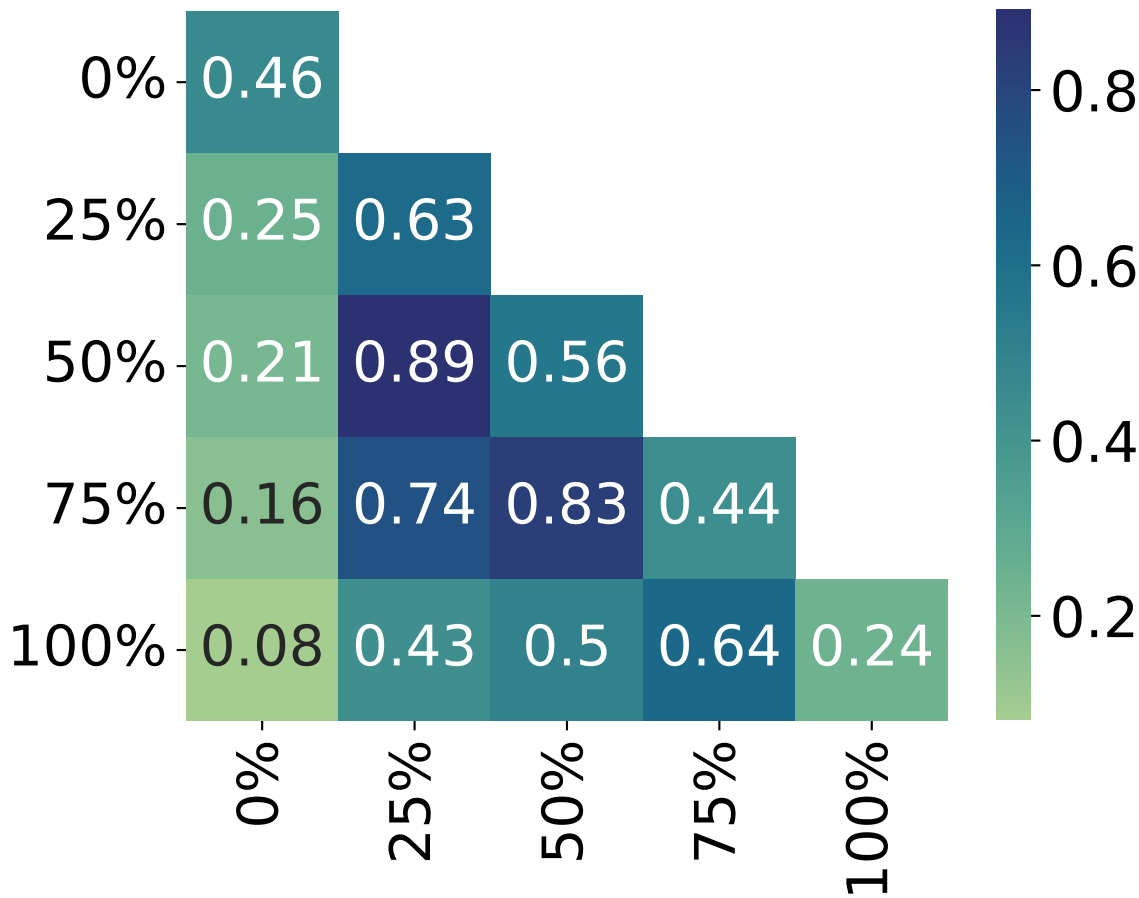

Supplement: software [file 2024.emnlp-main.886.software.zip]

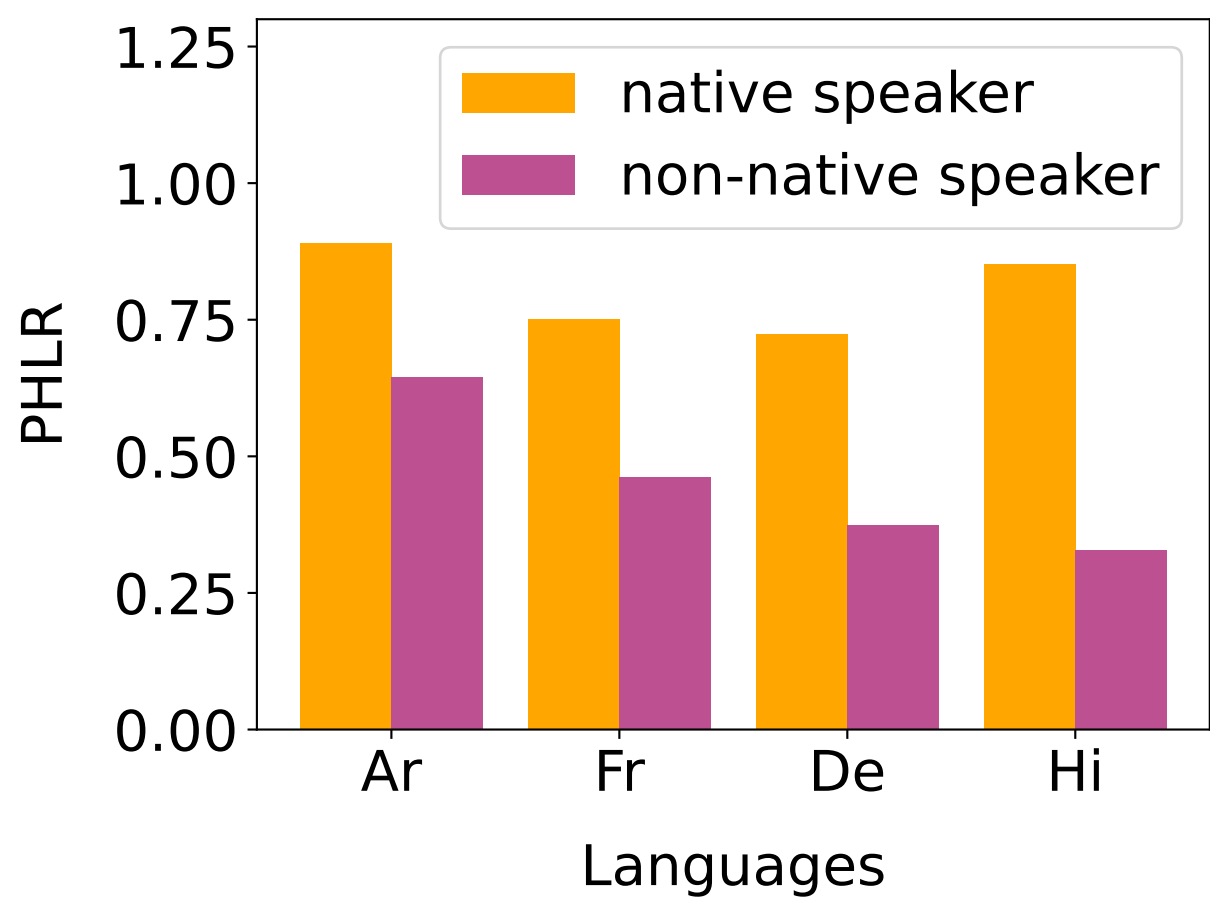

Supplement: software [file 2024.emnlp-main.886.software.zip]

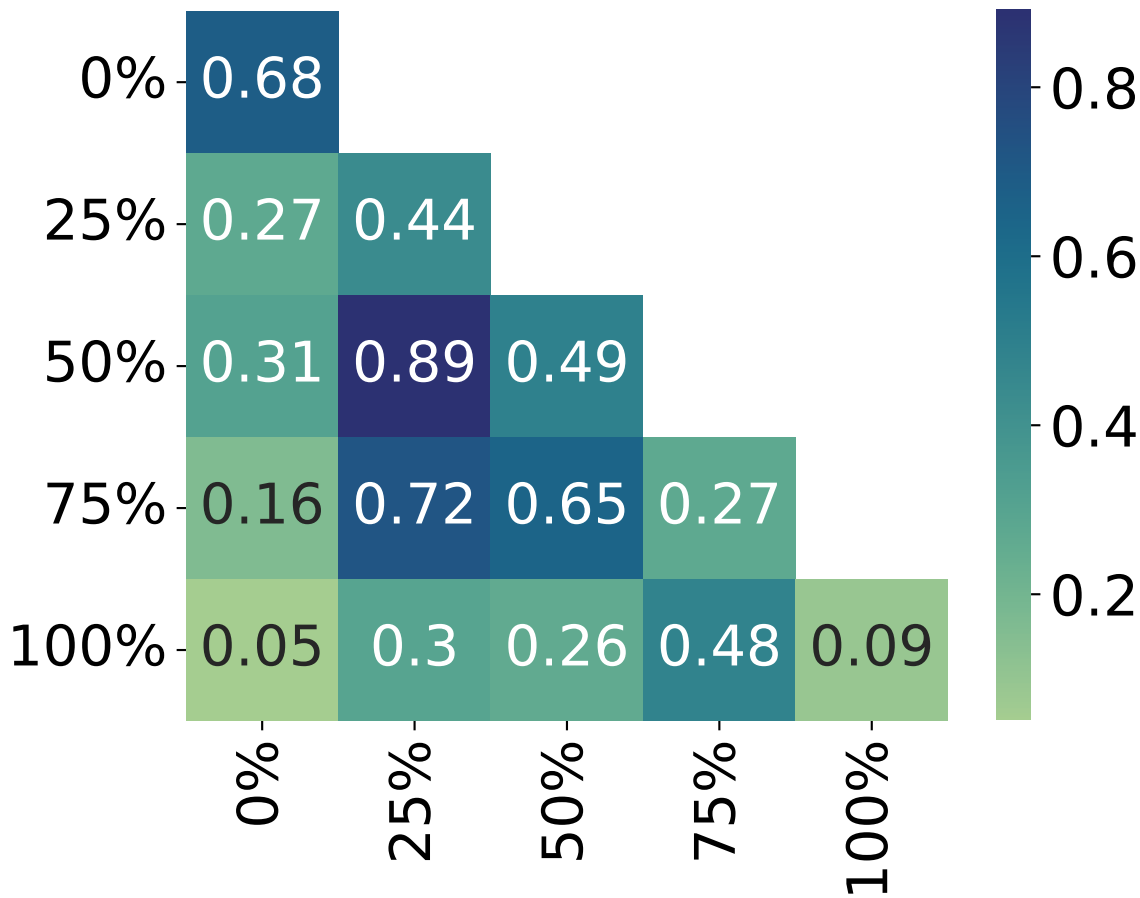

Supplement: software [file 2024.emnlp-main.886.software.zip]

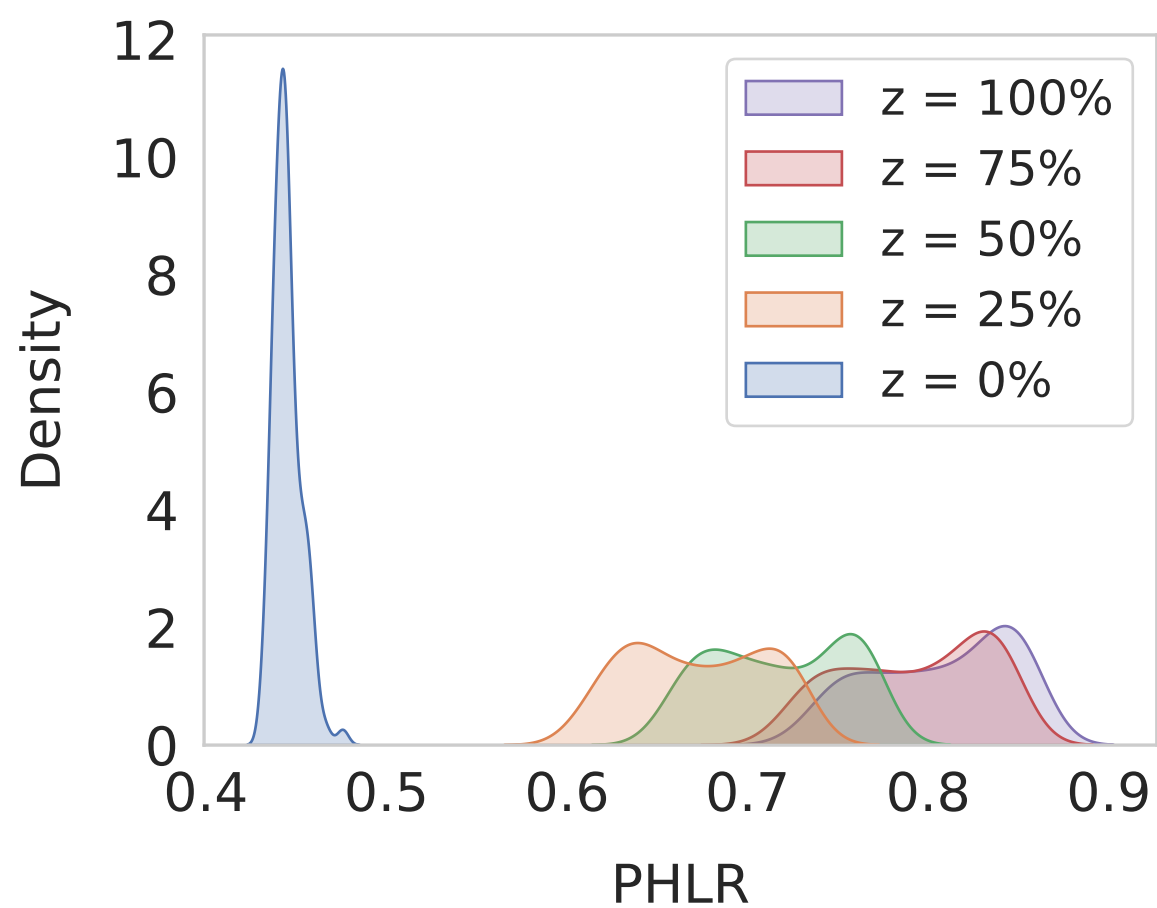

Supplement: software [file 2024.emnlp-main.886.software.zip]

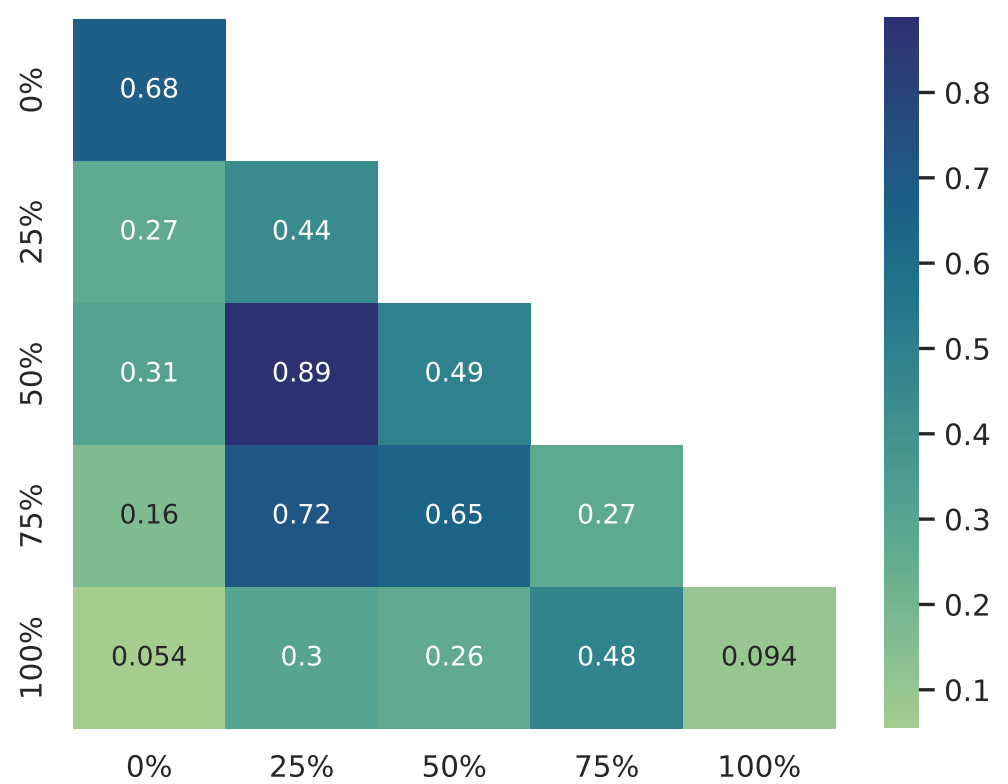

Supplement: software [file 2024.emnlp-main.886.software.zip]

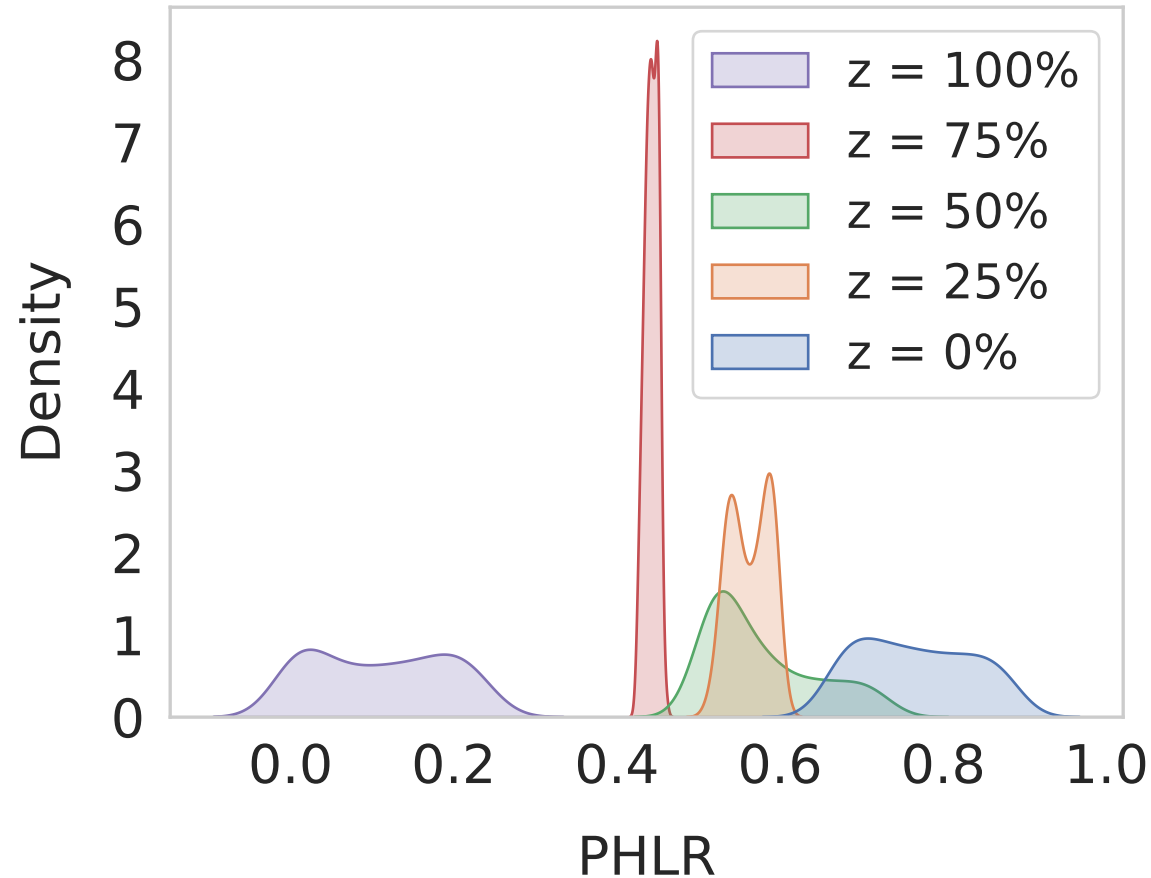

Supplement: software [file 2024.emnlp-main.886.software.zip]

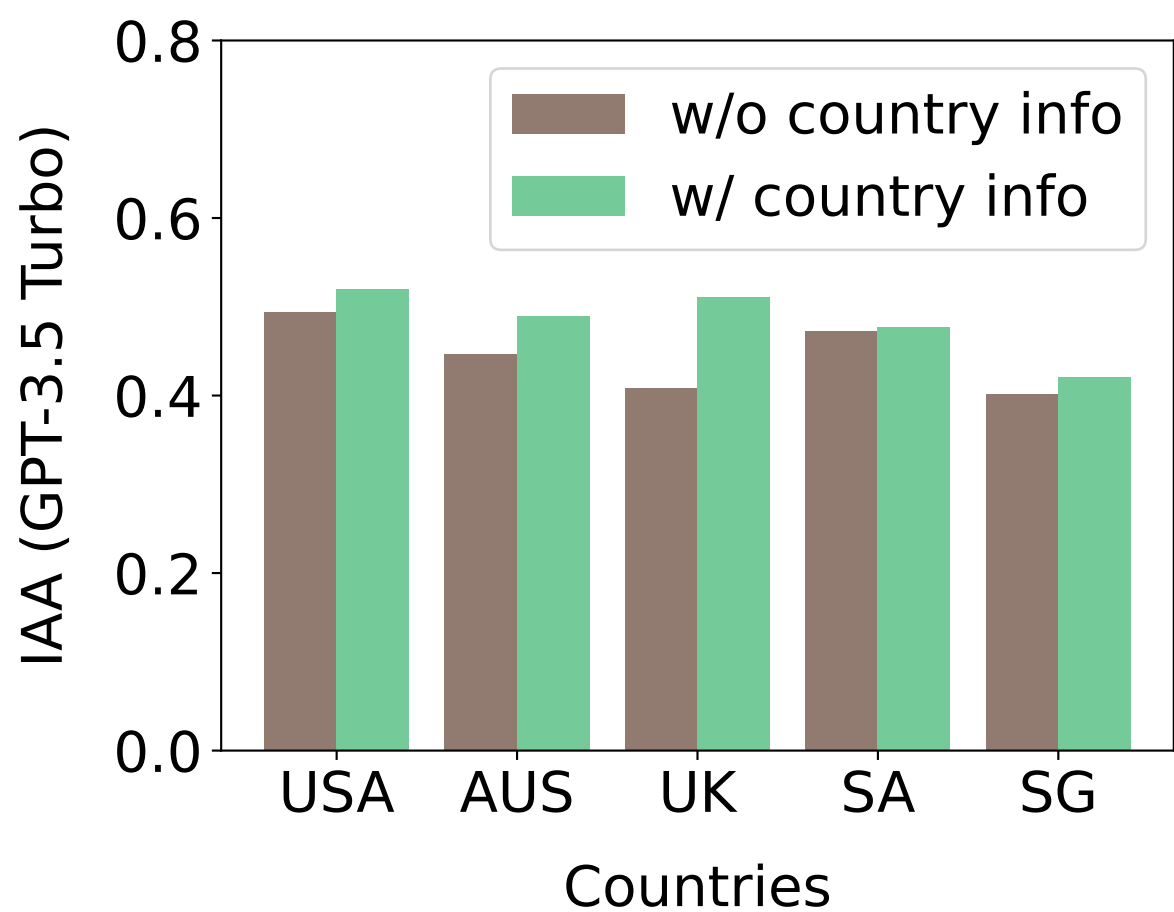

Supplement: software [file 2024.emnlp-main.886.software.zip]

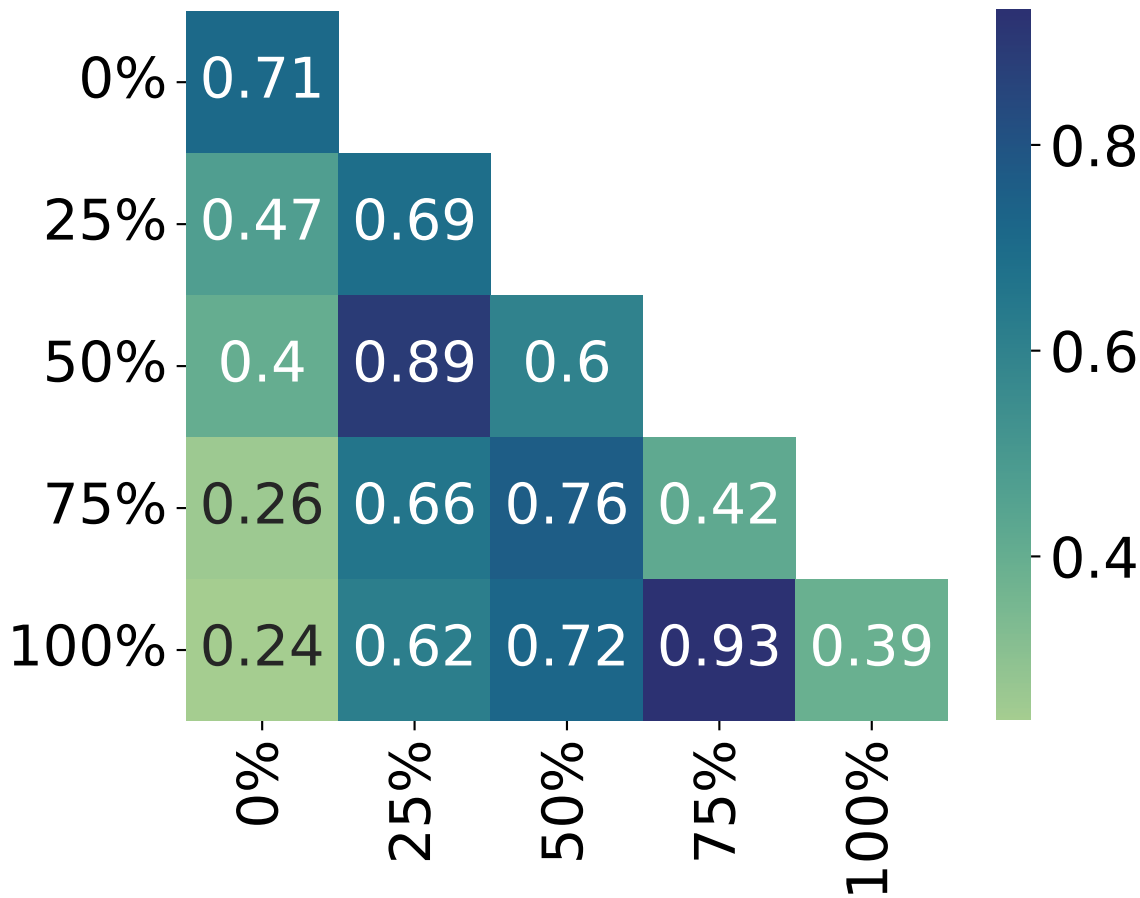

Supplement: software [file 2024.emnlp-main.886.software.zip]

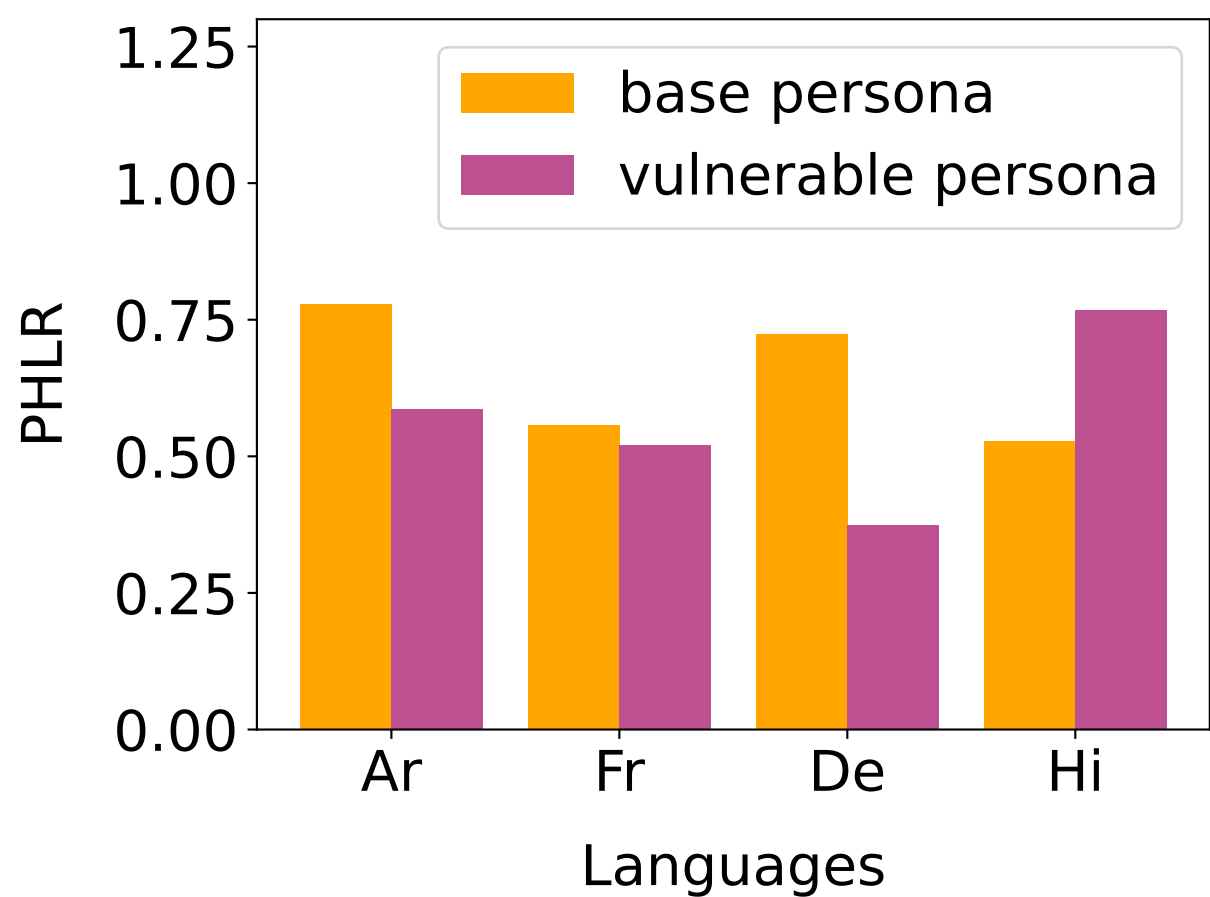

Supplement: software [file 2024.emnlp-main.886.software.zip]

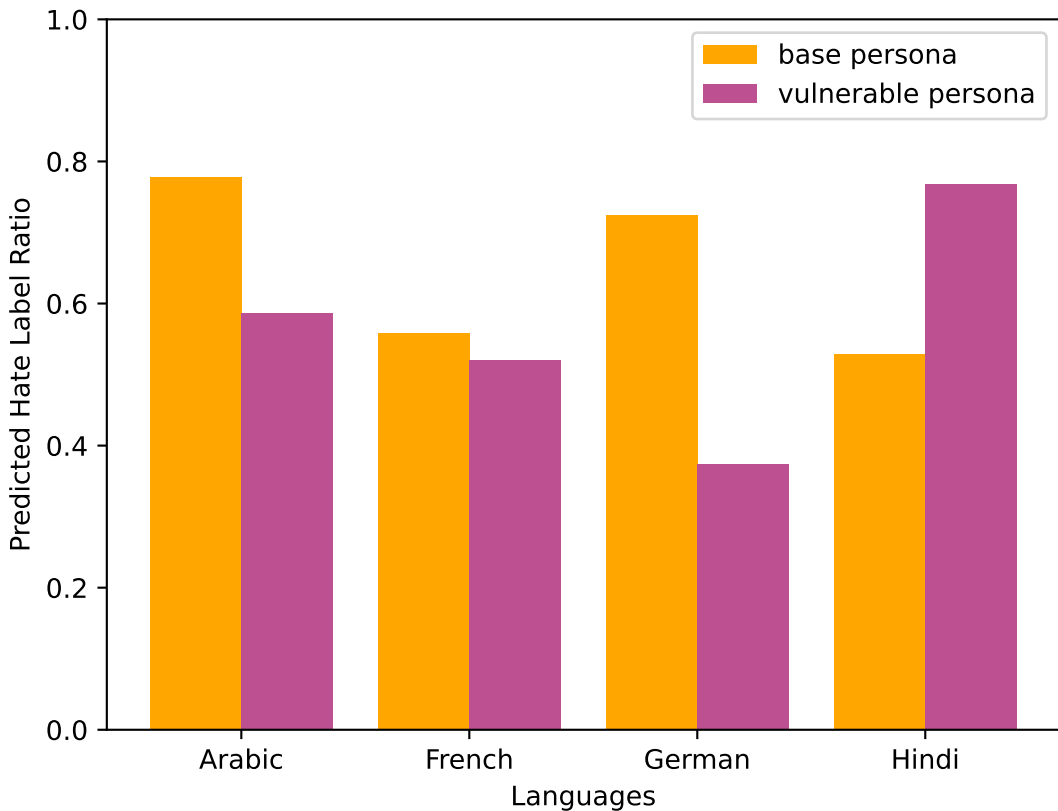

Supplement: software [file 2024.emnlp-main.886.software.zip]

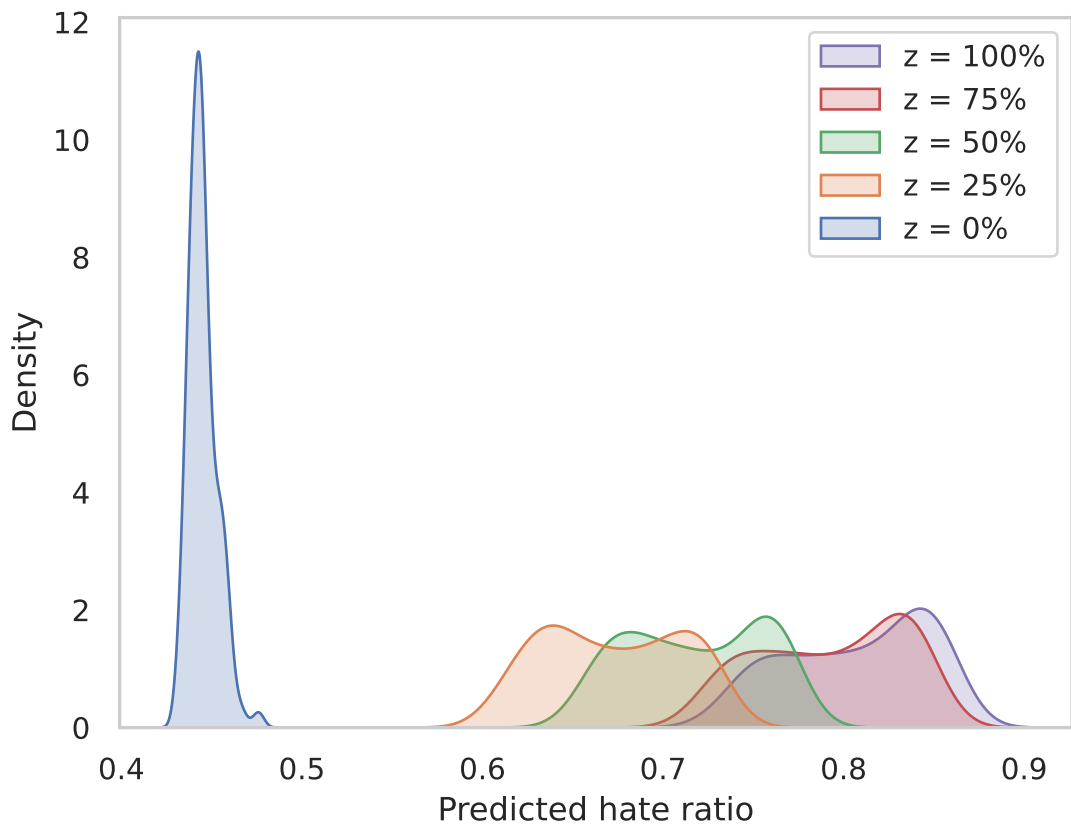

Supplement: software [file 2024.emnlp-main.886.software.zip]

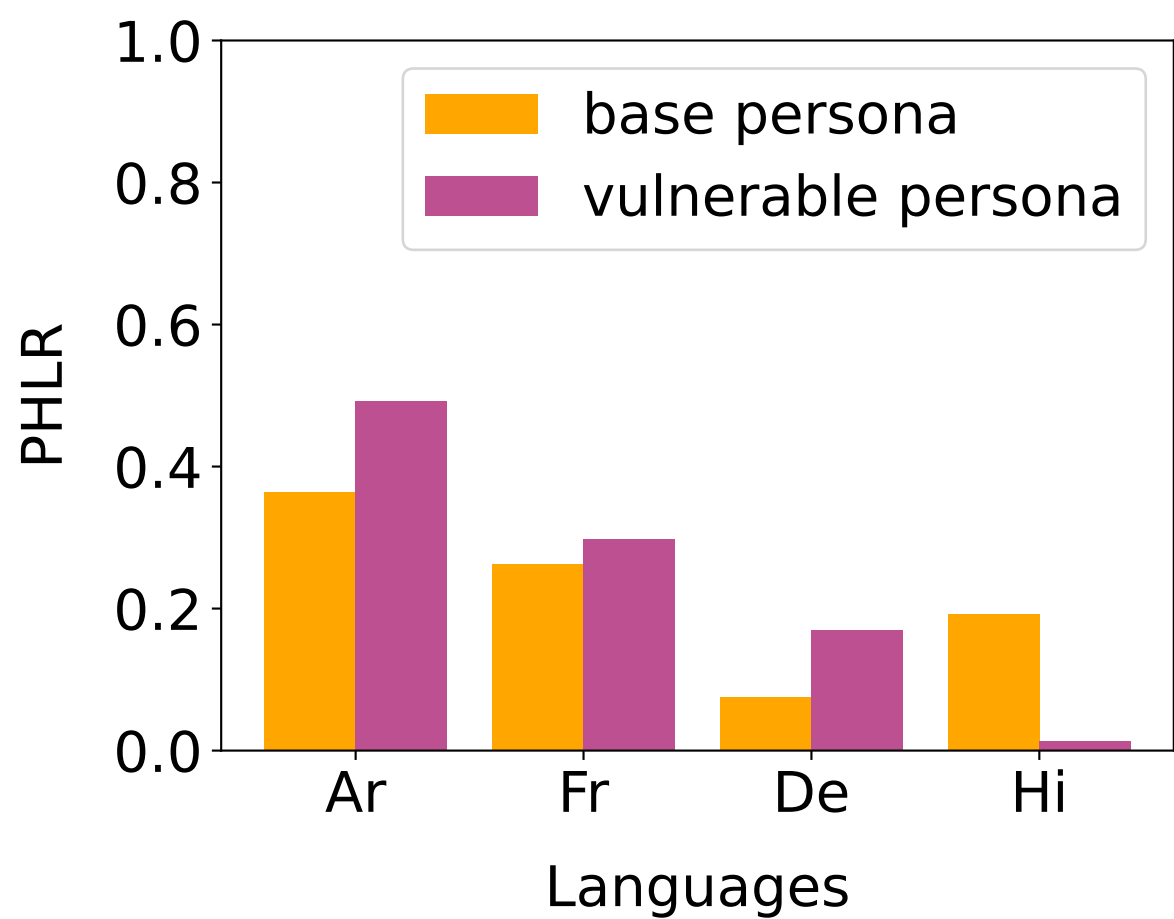

Supplement: software [file 2024.emnlp-main.886.software.zip]

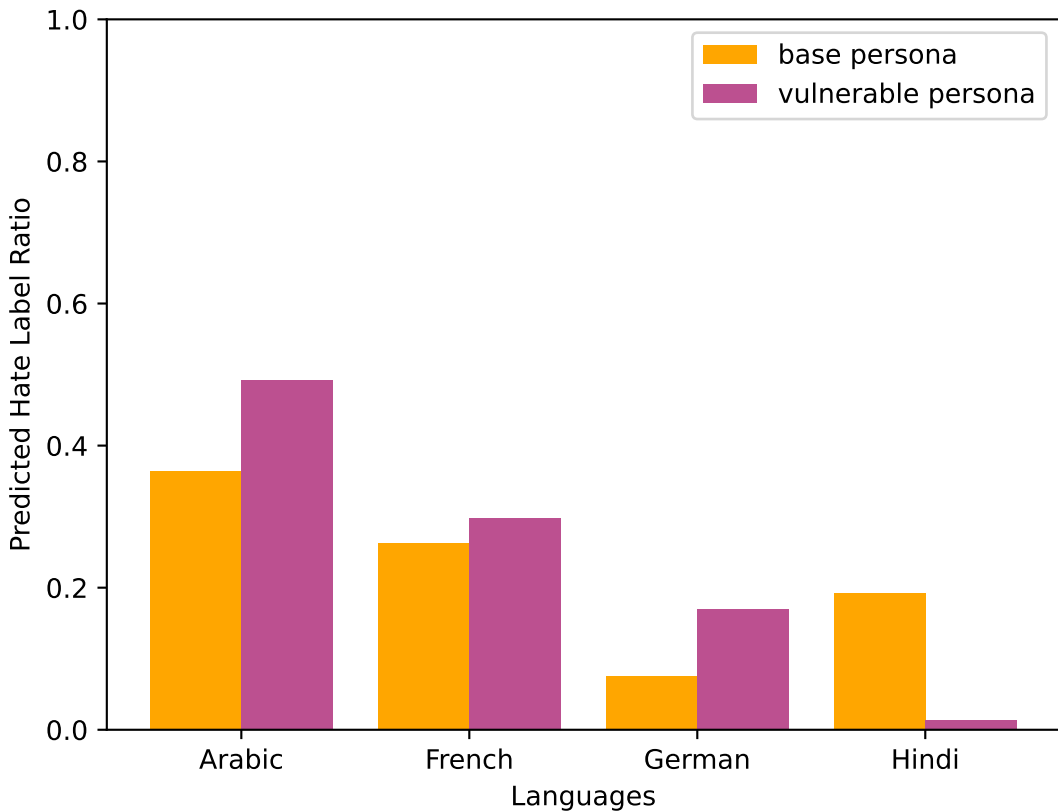

Supplement: software [file 2024.emnlp-main.886.software.zip]

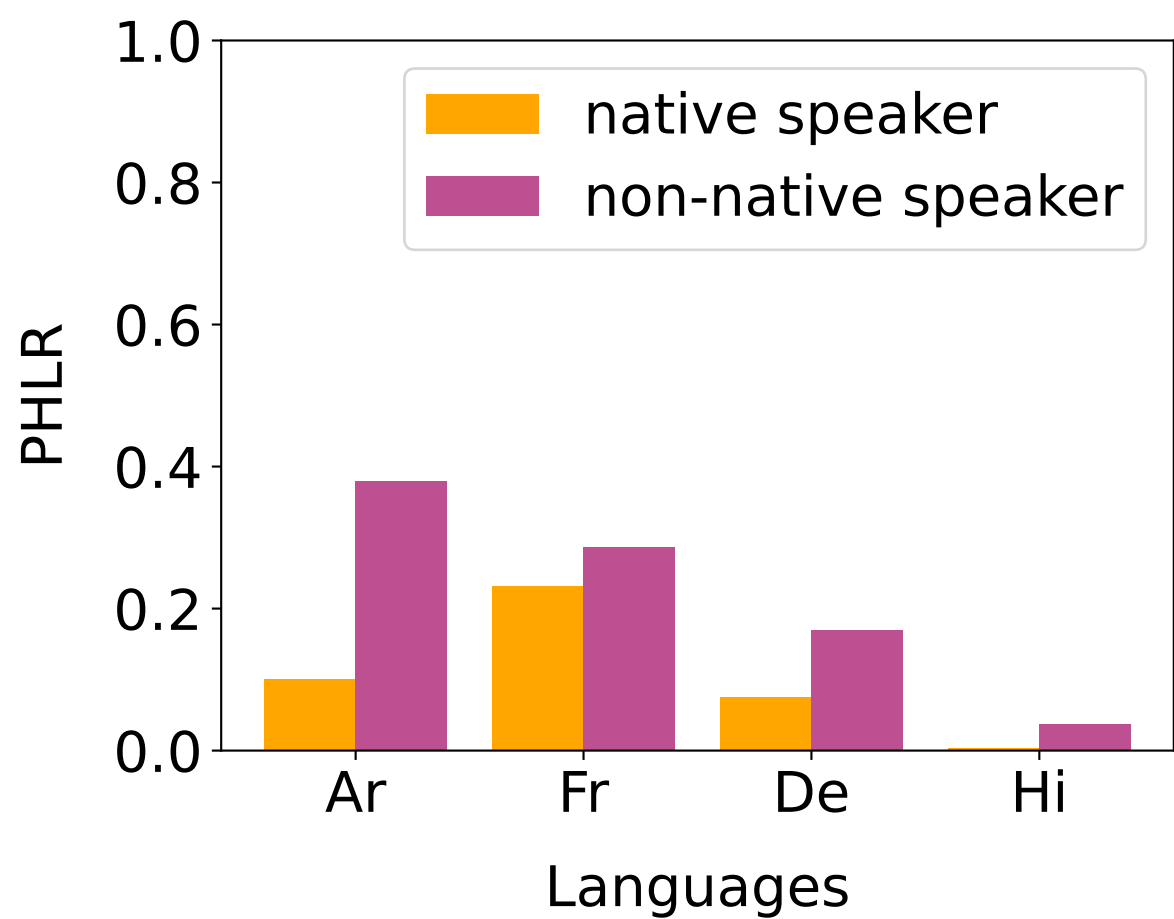

Supplement: software [file 2024.emnlp-main.886.software.zip]

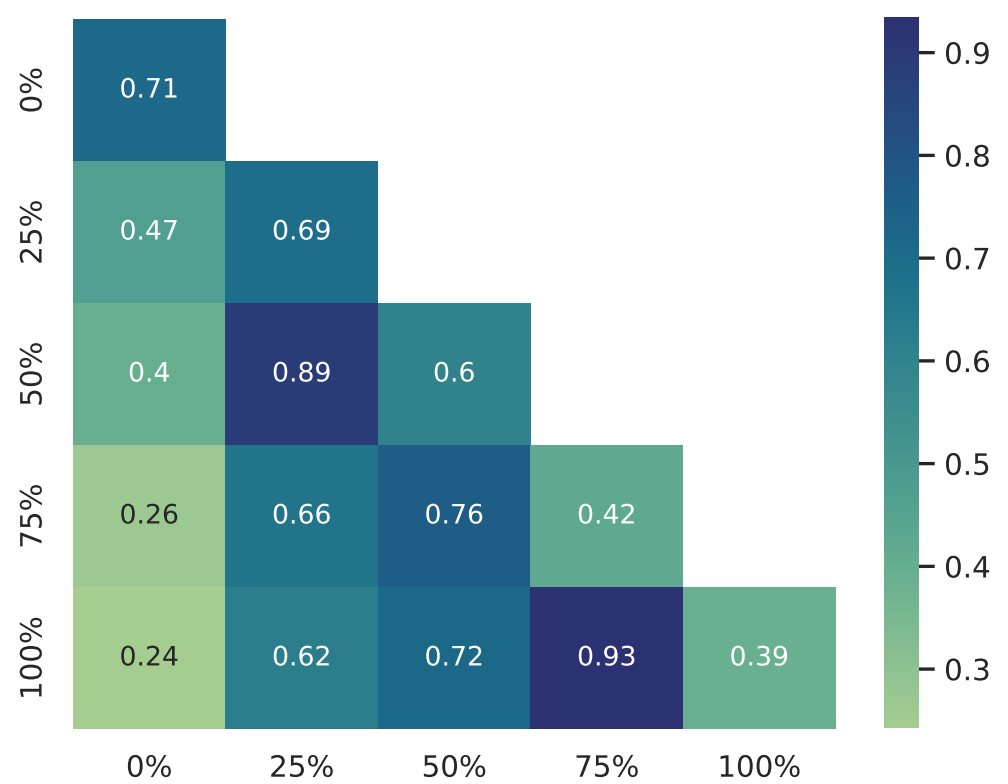

Supplement: software [file 2024.emnlp-main.886.software.zip]

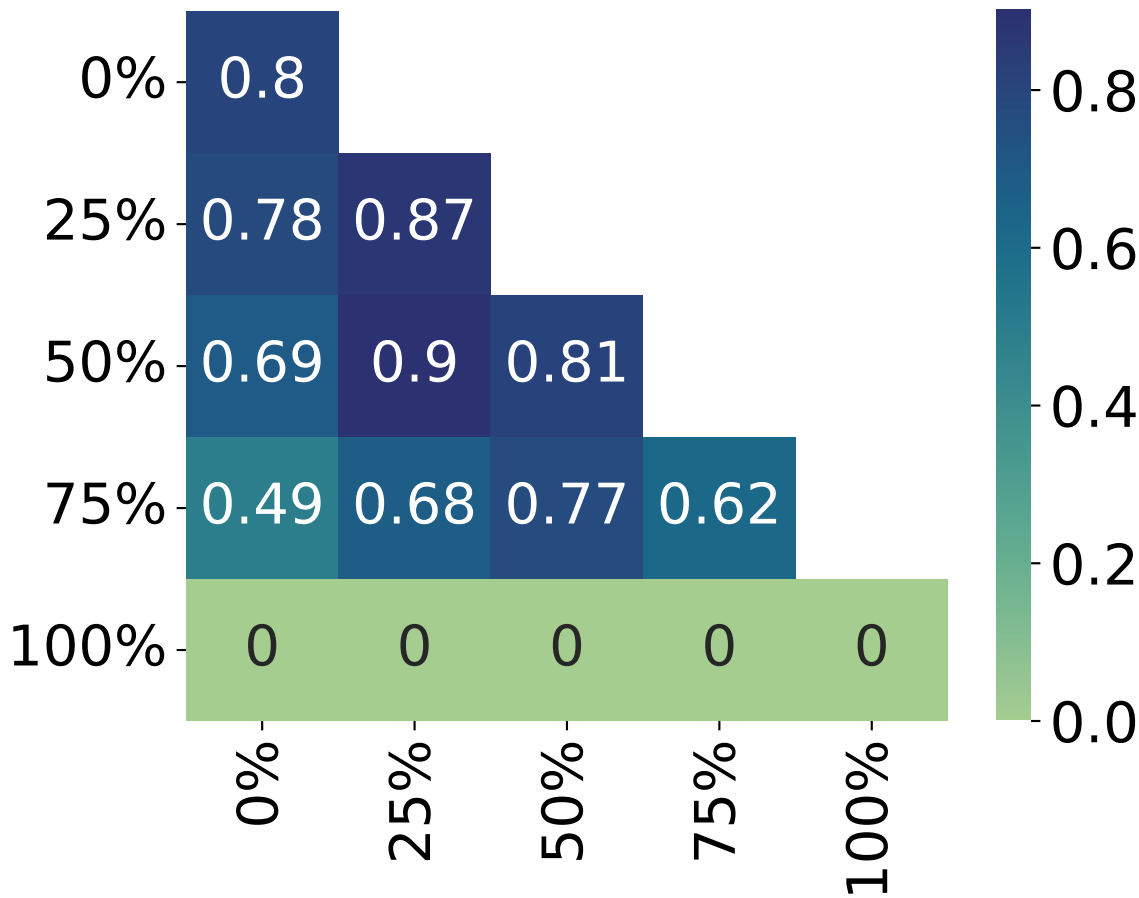

Supplement: software [file 2024.emnlp-main.886.software.zip]

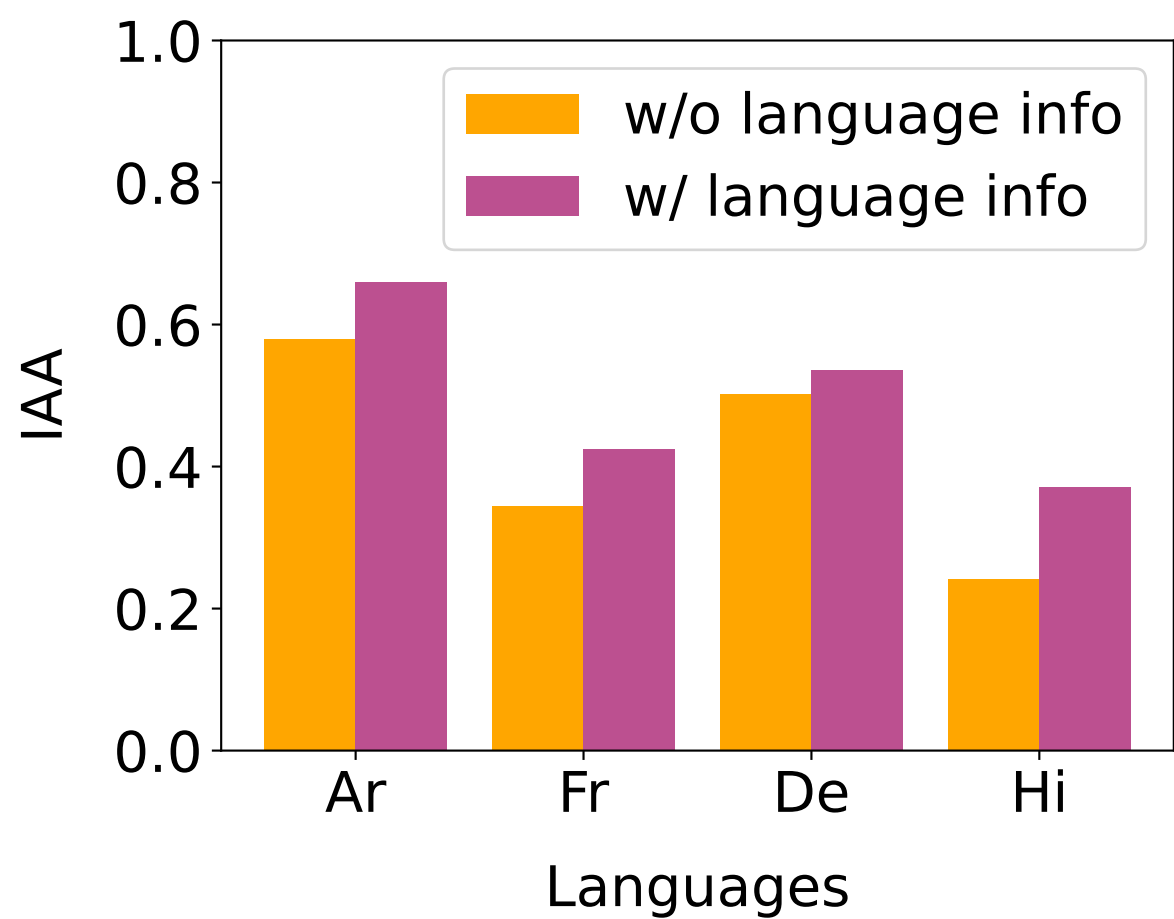

Supplement: software [file 2024.emnlp-main.886.software.zip]

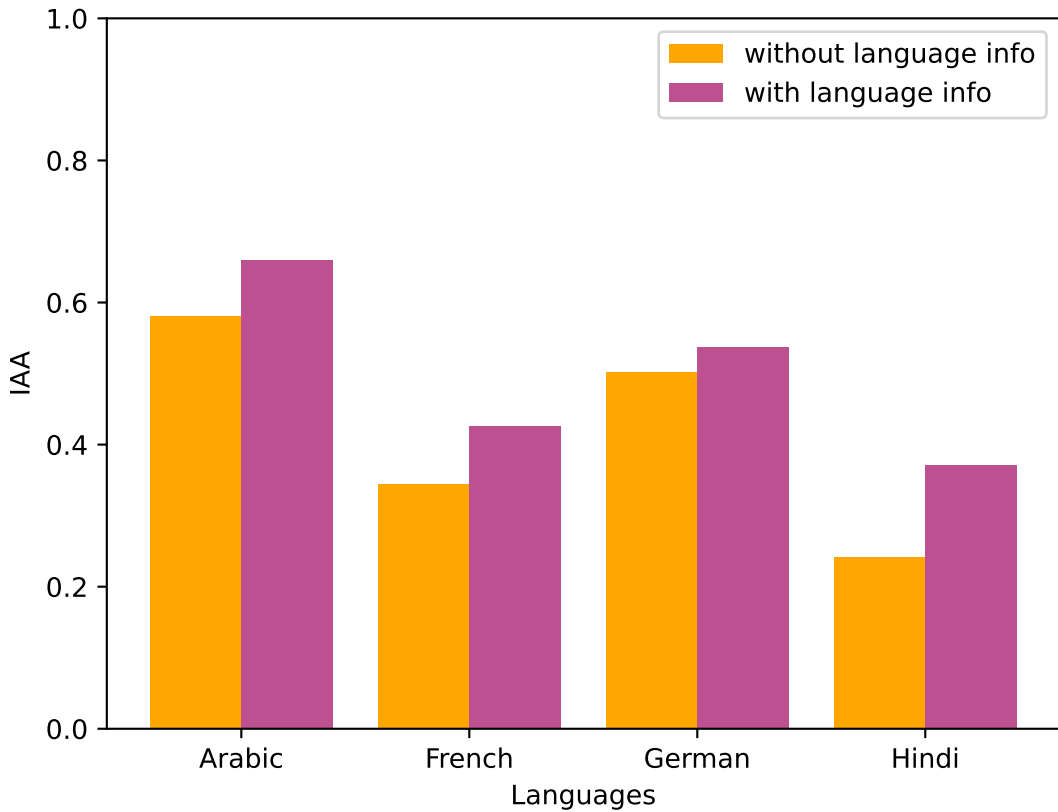

Supplement: software [file 2024.emnlp-main.886.software.zip]

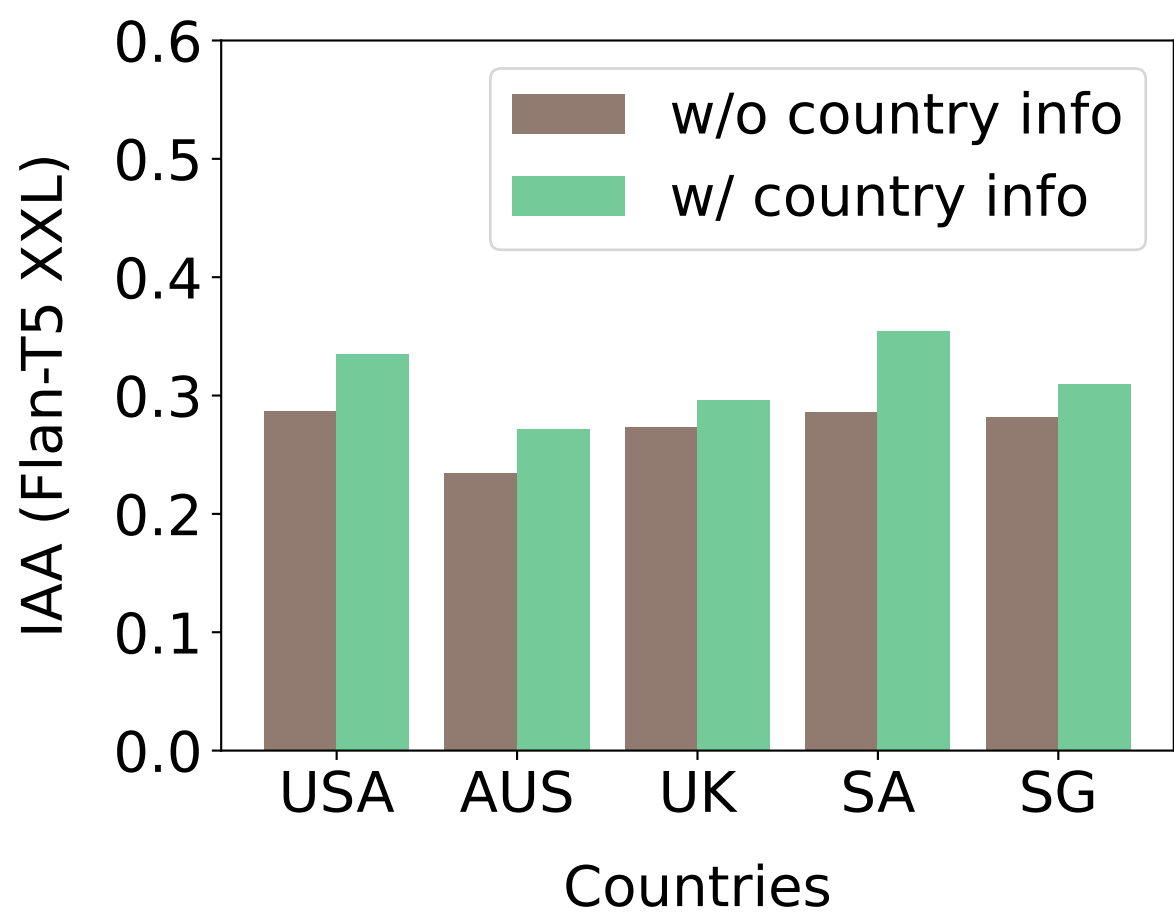

Supplement: software [file 2024.emnlp-main.886.software.zip]

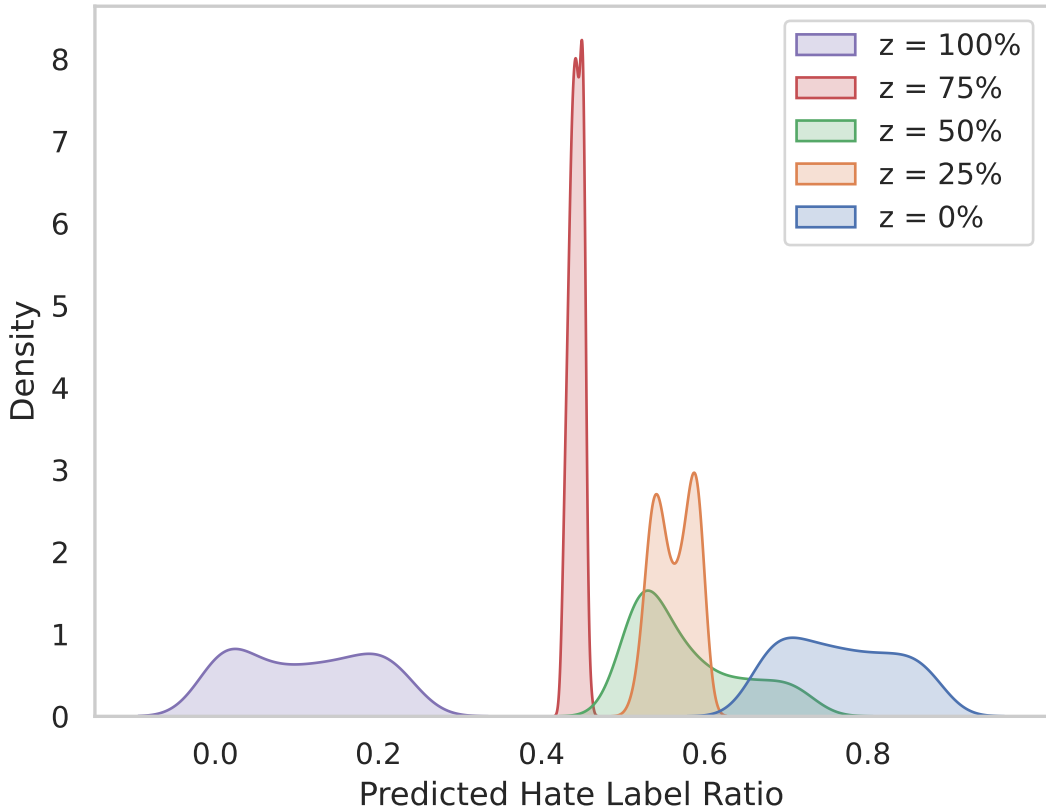

Supplement: software [file 2024.emnlp-main.886.software.zip]
